# Supplementary material for: Energetic Features of H-bonded and π-stacked Assemblies in Pyrazole-based Coordination Compounds of Mn(II) and Cu(II): Experimental and Theoretical Studies
Source: Preprints.org preprint supplement (doi:10.20944/preprints202403.0550.v1), 2024-03-11

Structure factors have been supplied for datablock(s) shelx

No syntax errors found. CIF dictionary Interpreting this report

|                 |                  |                    |               |
|-----------------|------------------|--------------------|---------------|
| Bond precision: | C-C = 0.0032 A   | Wavelength=1.54178 |               |
| Cell:           | a=19.2401 (10)   | b=12.1579 (7)      | c=10.1312 (6) |
|                 | alpha=90         | beta=90            | gamma=90      |
| Temperature:    | 100 K            |                    |               |
|                 | Calculated       | Reported           |               |
| Volume          | 2369.9 (2)       | 2369.9 (2)         |               |
| Space group     | P b c n          | P b c n            |               |
| Hall group      | -P 2n 2ab        | -P 2n 2ab          |               |
| Moiety formula  | C24 H28 Mn N4 O5 | ?                  |               |
| Sum formula     | C24 H28 Mn N4 O5 | C24 H28 Mn N4 O5   |               |
| Mr              | 507.44           | 507.44             |               |
| Dx, g cm-3      | 1.422            | 1.422              |               |
| Z               | 4                | 4                  |               |
| Mu (mm-1)       | 4.893            | 4.893              |               |
| F000            | 1060.0           | 1060.0             |               |
| F000'           | 1060.97          |                    |               |
| h, k, lmax      | 23, 14, 12       | 23, 14, 12         |               |
| Nref            | 2171             | 2136               |               |
| Tmin, Tmax      | 0.256, 0.294     | 0.253, 0.753       |               |
| Tmin'           | 0.088            |                    |               |

Data completeness= 0.984                      Theta (max)= 68.225

```
R(reflections)= 0.0414( 2037)      wR2(reflections)=
S = 1.086                        0.1133( 2136)
Npar= 161
```

---

The following ALERTS were generated. Each ALERT has the format

**test-name\_ALERT\_alert-type\_alert-level.**

Click on the hyperlinks for more details of the test.

---

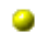

### Alert level C

|                   |             |                             |                |                   |          |         |        |
|-------------------|-------------|-----------------------------|----------------|-------------------|----------|---------|--------|
| PLAT220_ALERT_2_C | NonSolvent  | Resd 1                      | C              | Ueq(max)/Ueq(min) | Range    | 3.3     | Ratio  |
| PLAT250_ALERT_2_C | Large U3/U1 | Ratio for <U(i,j)>          | Tensor(Resd 1) |                   |          | 2.7     | Note   |
| PLAT911_ALERT_3_C | Missing FCF | Refl Between Thmin & STh/L= | 0.600          |                   |          | 32      | Report |
|                   | 0 4 0,      | 2 2 0,                      | 3 5 0,         | 8 12 0,           | 10 0 0,  | 15 9 0, |        |
|                   | 16 8 0,     | 17 9 0,                     | 19 5 0,        | 0 2 1,            | 1 2 1,   | 4 1 1,  |        |
|                   | 5 1 1,      | 6 1 1,                      | 4 6 2,         | 8 12 2,           | 12 0 2,  | 20 0 2, |        |
|                   | 6 2 3,      | 13 11 3,                    | 16 8 3,        | 0 0 4,            | 11 9 4,  | 20 0 4, |        |
|                   | 13 7 7,     | 15 7 7,                     | 12 2 9,        | 8 0 10,           | 10 0 10, | 0 2 11, |        |
|                   | 8 2 11,     | 0 0 12,                     |                |                   |          |         |        |

---

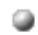

### Alert level G

|                   |                                                            |        |              |
|-------------------|------------------------------------------------------------|--------|--------------|
| PLAT002_ALERT_2_G | Number of Distance or Angle Restraints on AtSite           | 3      | Note         |
| PLAT007_ALERT_5_G | Number of Unrefined Donor-H Atoms .....                    | 3      | Report       |
|                   | H1A H1B H2                                                 |        |              |
| PLAT176_ALERT_4_G | The CIF-Embedded .res File Contains SADI Records           | 1      | Report       |
| PLAT232_ALERT_2_G | Hirshfeld Test Diff (M-X) Mn1 --O2 .                       | 5.4    | s.u.         |
| PLAT300_ALERT_4_G | Atom Site Occupancy of H1A Constrained at                  | 0.5    | Check        |
| PLAT300_ALERT_4_G | Atom Site Occupancy of H1B Constrained at                  | 0.5    | Check        |
| PLAT779_ALERT_4_G | Suspect or Irrelevant (Bond) Angle(s) in CIF ...           | 10.30  | Deg.         |
|                   | H1A -O1 -H1B 1_555 1_555 3_655 ..... #                     | 17     | Check        |
| PLAT779_ALERT_4_G | Suspect or Irrelevant (Bond) Angle(s) in CIF ...           | 10.30  | Deg.         |
|                   | H1B -O1 -H1A 1_555 1_555 3_655 ..... #                     | 19     | Check        |
| PLAT860_ALERT_3_G | Number of Least-Squares Restraints .....                   | 1      | Note         |
| PLAT883_ALERT_1_G | No Info/Value for _atom_sites_solution_primary .           |        | Please Do !  |
| PLAT899_ALERT_4_G | SHELXL2018 is Deprecated and Succeeded by SHELXL           | 2019/3 | Note         |
| PLAT910_ALERT_3_G | Missing # of FCF Reflection(s) Below Theta(Min).           | 3      | Note         |
|                   | 1 1 0, 2 0 0, 1 1 1,                                       |        |              |
| PLAT913_ALERT_3_G | Missing # of Very Strong Reflections in FCF ....           | 3      | Note         |
|                   | 2 0 0, 0 2 1, 5 1 1,                                       |        |              |
| PLAT933_ALERT_2_G | Number of HKL-OMIT Records in Embedded .res File           | 8      | Note         |
|                   | 0 2 1, 5 1 1, 4 1 1, 1 1 0, 0 0 4, 20 0 2,                 |        |              |
|                   | 1 2 1, 12 0 2,                                             |        |              |
| PLAT965_ALERT_2_G | The SHELXL WEIGHT Optimisation has not Converged           |        | Please Check |
| PLAT969_ALERT_5_G | The 'Henn et al.' R-Factor-gap value .....                 | 3.61   | Note         |
|                   | Predicted wR2: Based on SigI**2 3.14 or SHELX Weight 10.84 |        |              |
| PLAT978_ALERT_2_G | Number C-C Bonds with Positive Residual Density.           | 3      | Info         |

---

- 0 **ALERT level A** = Most likely a serious problem - resolve or explain  
0 **ALERT level B** = A potentially serious problem, consider carefully  
3 **ALERT level C** = Check. Ensure it is not caused by an omission or oversight  
17 **ALERT level G** = General information/check it is not something unexpected

- 1 ALERT type 1 CIF construction/syntax error, inconsistent or missing data  
7 ALERT type 2 Indicator that the structure model may be wrong or deficient  
4 ALERT type 3 Indicator that the structure quality may be low  
6 ALERT type 4 Improvement, methodology, query or suggestion  
2 ALERT type 5 Informative message, check
-

---

It is advisable to attempt to resolve as many as possible of the alerts in all categories. Often the minor alerts point to easily fixed oversights, errors and omissions in your CIF or refinement strategy, so attention to these fine details can be worthwhile. In order to resolve some of the more serious problems it may be necessary to carry out additional measurements or structure refinements. However, the purpose of your study may justify the reported deviations and the more serious of these should normally be commented upon in the discussion or experimental section of a paper or in the "special\_details" fields of the CIF. checkCIF was carefully designed to identify outliers and unusual parameters, but every test has its limitations and alerts that are not important in a particular case may appear. Conversely, the absence of alerts does not guarantee there are no aspects of the results needing attention. It is up to the individual to critically assess their own results and, if necessary, seek expert advice.

### **Publication of your CIF in IUCr journals**

A basic structural check has been run on your CIF. These basic checks will be run on all CIFs submitted for publication in IUCr journals (*Acta Crystallographica*, *Journal of Applied Crystallography*, *Journal of Synchrotron Radiation*); however, if you intend to submit to *Acta Crystallographica Section C* or *E* or *IUCrData*, you should make sure that full publication checks are run on the final version of your CIF prior to submission.

### **Publication of your CIF in other journals**

Please refer to the *Notes for Authors* of the relevant journal for any special instructions relating to CIF submission.

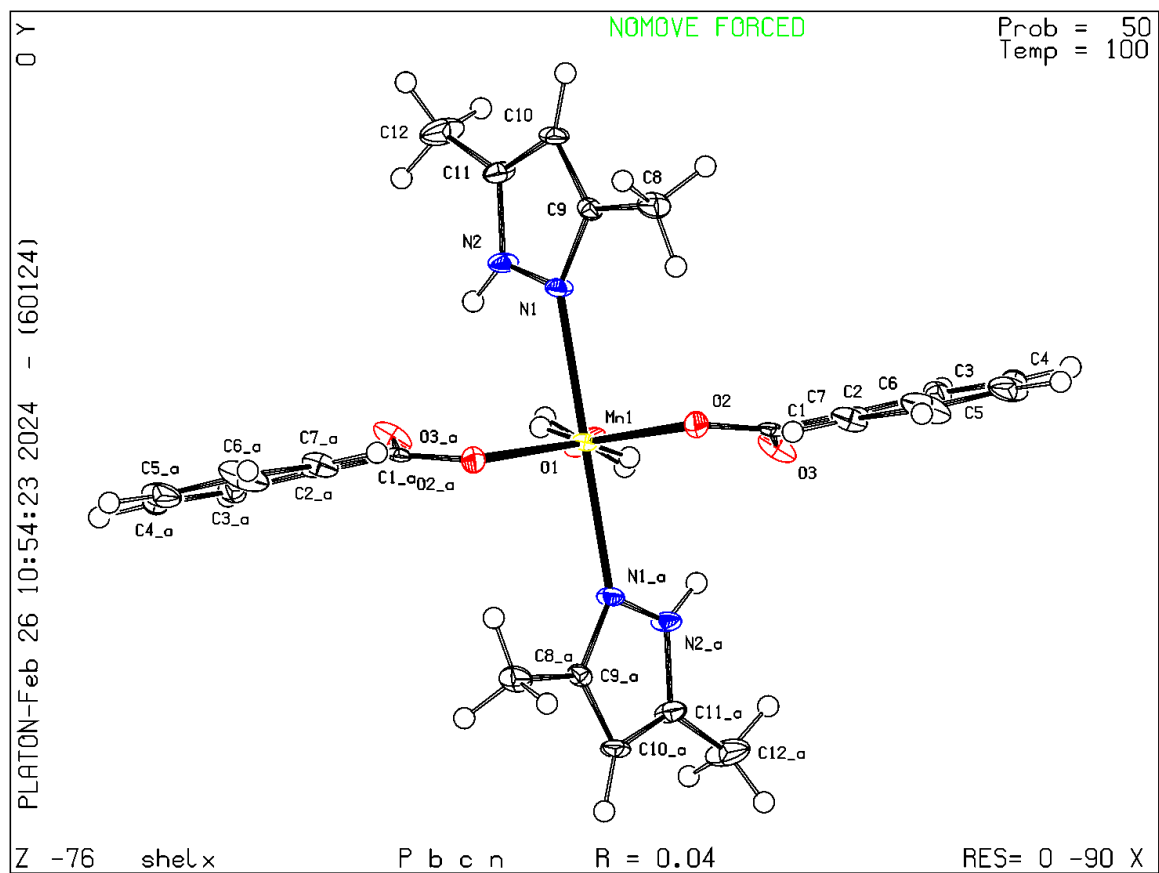

Supplement: Supplementary file 1 [file supplementary]
