# Supplementary material for: Energetic Features of H-bonded and π-stacked Assemblies in Pyrazole-based Coordination Compounds of Mn(II) and Cu(II): Experimental and Theoretical Studies
Source: Preprints.org preprint supplement (doi:10.20944/preprints202403.0550.v1), 2024-03-11
Supplement: Supplementary file 1 [file supplementary]

Supplementary Information

**
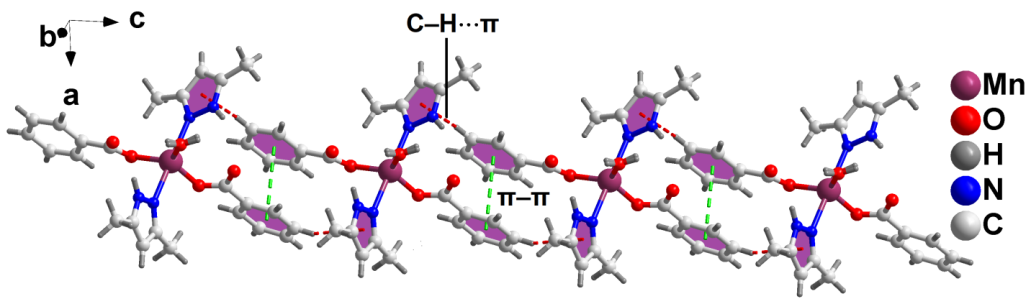
**

**FigureS1** 1D chain of compound 1 involving intermolecular C‒H⋯π and π-stacking interactions along the crystallographic c axis


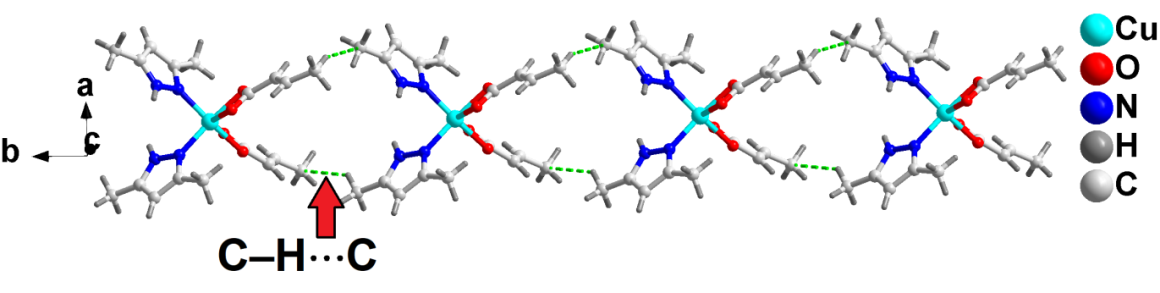


**FigureS2** 1D supramolecular chain of compound **2** assisted by non-covalent C‒H⋯C interactions along the crystallographic b axis


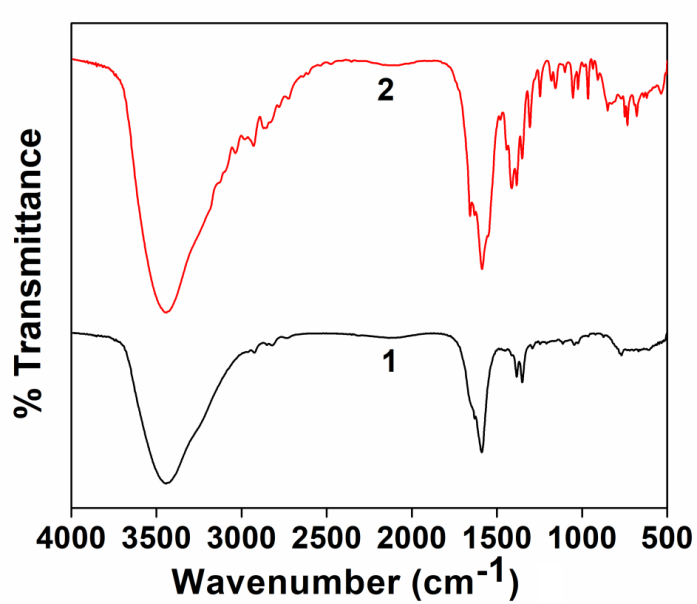


**FigureS3** FT-IR spectra of compounds **1** and **2**

**
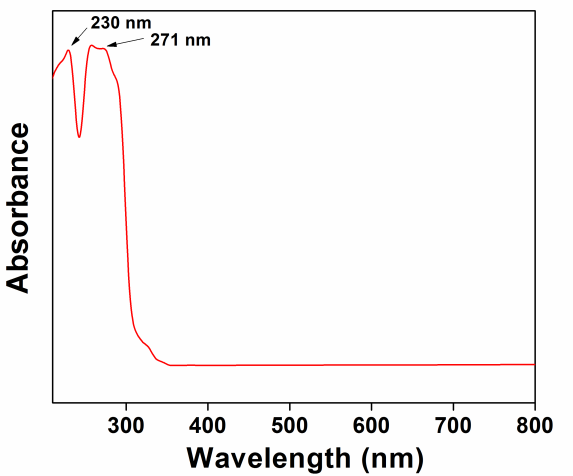

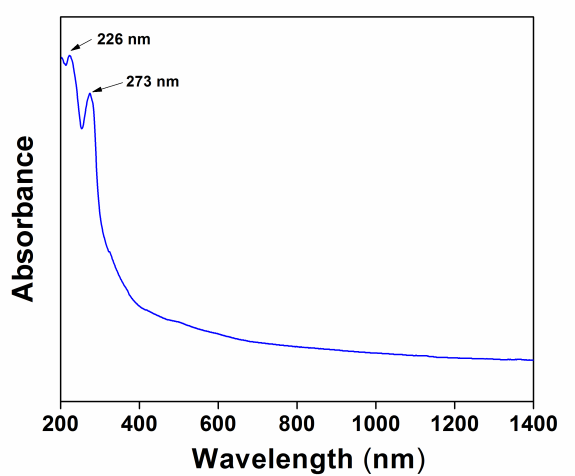
**

**FigureS4**(**a**)UV-Vis-NIR spectrum of compound 1 (**b**) UV-Vis spectrum of 1

**
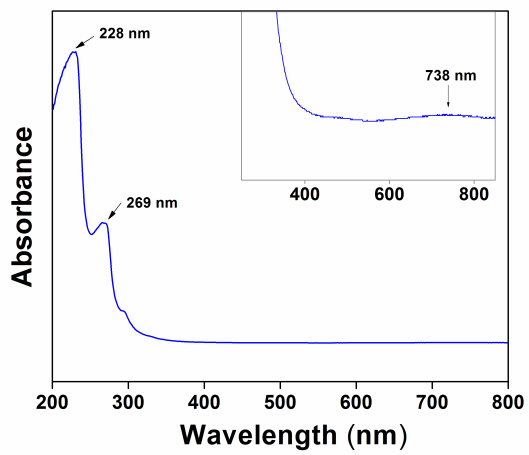

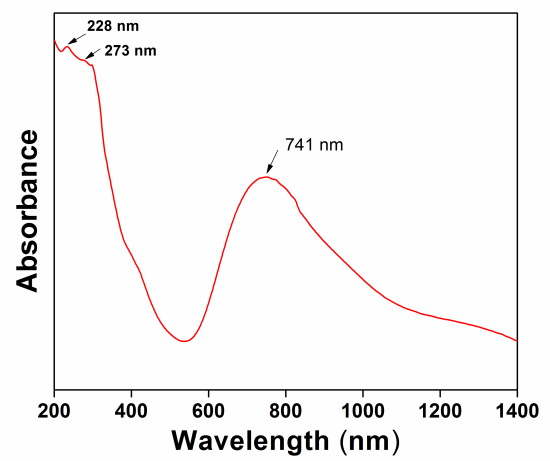
**

**FigureS5**(**a**) UV-Vis-NIR spectrum of compound **2** (**b**) UV-Vis spectrum of **2**.

**
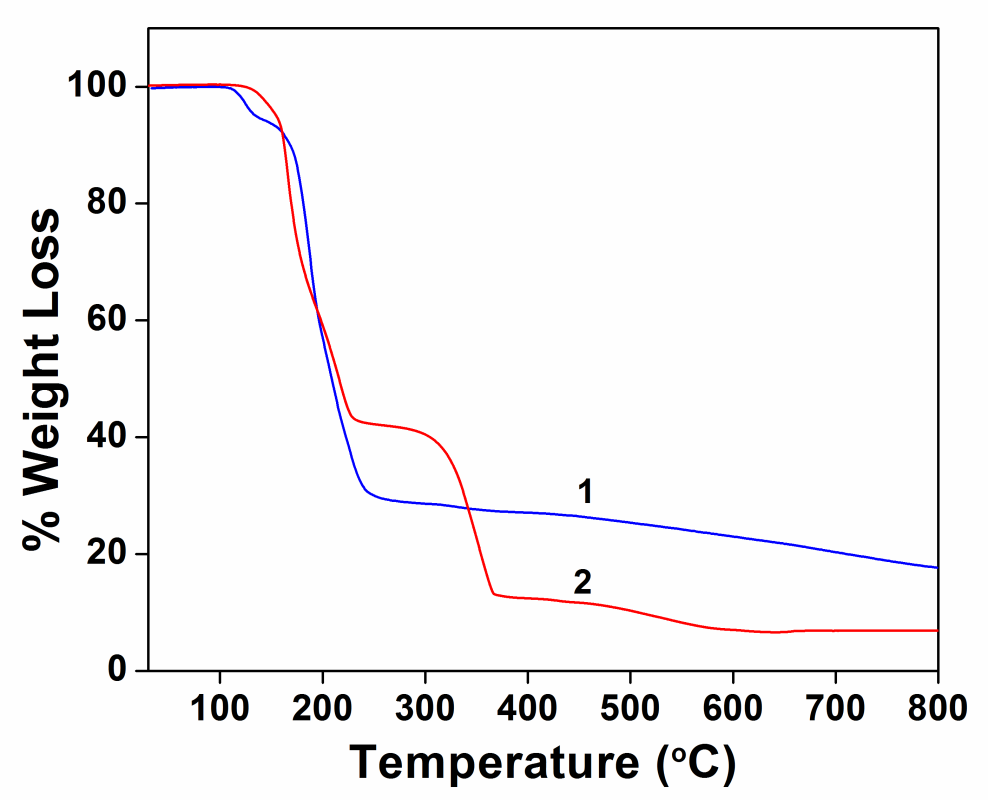
**

**FigureS6** Thermogravimetric curves of the compounds **1** and **2**.
