# Supplementary material for: Energetic Features of H-bonded and π-stacked Assemblies in Pyrazole-based Coordination Compounds of Mn(II) and Cu(II): Experimental and Theoretical Studies
Source: Preprints.org preprint supplement (doi:10.20944/preprints202403.0550.v1), 2024-03-11
Supplement: Supplementary file 3 [file supplementary]

Archive with 5 entries (5 files):
- CuCl2_crotonate_DMP.cif
- CuCl2_crotonate_DMP.pdf
- MnCl2_DMP_bz.cif
- MnCl2_DMP_bz.pdf
- Supplementary Information.docx
