# Supplementary material for: Energetic Features of H-bonded and π-stacked Assemblies in Pyrazole-based Coordination Compounds of Mn(II) and Cu(II): Experimental and Theoretical Studies
Source: Preprints.org preprint supplement (doi:10.20944/preprints202403.0550.v1), 2024-03-11
Supplement: Supplementary file 3 [file supplementary › CuCl2_crotonate_DMP.cif]

 
data_shelx
 
_audit_creation_method            'SHELXL-2018/3'
_shelx_SHELXL_version_number      '2018/3'
_chemical_name_systematic         ?
_chemical_name_common             ?
_chemical_melting_point           ?
_chemical_formula_moiety          ?
_chemical_formula_sum
 'C18 H26 Cu N4 O4' 
_chemical_formula_weight          425.97

loop_
 _atom_type_symbol
 _atom_type_description
 _atom_type_scat_dispersion_real
 _atom_type_scat_dispersion_imag
 _atom_type_scat_source
 'C'  'C'   0.0181   0.0091
 'International Tables Vol C Tables 4.2.6.8 and 6.1.1.4'
 'H'  'H'   0.0000   0.0000
 'International Tables Vol C Tables 4.2.6.8 and 6.1.1.4'
 'Cu'  'Cu'  -1.9646   0.5888
 'International Tables Vol C Tables 4.2.6.8 and 6.1.1.4'
 'N'  'N'   0.0311   0.0180
 'International Tables Vol C Tables 4.2.6.8 and 6.1.1.4'
 'O'  'O'   0.0492   0.0322
 'International Tables Vol C Tables 4.2.6.8 and 6.1.1.4'


_vrf_PLAT230_shelx
;
PROBLEM:  Hirshfeld Test Diff for C7 --C8 . 8.7 s.u.
RESPONSE: Some of the atoms were not ideally shaped due to thermal disorder. 
However, this doesn't indicate an incorrect atom-type assignment.
;

 _space_group_crystal_system       orthorhombic
_space_group_IT_number            60
_space_group_name_H-M_alt         'P b c n'
_space_group_name_Hall            '-P 2n 2ab'
 
_shelx_space_group_comment
;
The symmetry employed for this shelxl refinement is uniquely defined
by the following loop, which should always be used as a source of
symmetry information in preference to the above space-group names.
They are only intended as comments.
;
 
loop_
 _space_group_symop_operation_xyz
 'x, y, z'
 '-x+1/2, -y+1/2, z+1/2'
 '-x, y, -z+1/2'
 'x+1/2, -y+1/2, -z'
 '-x, -y, -z'
 'x-1/2, y-1/2, -z-1/2'
 'x, -y, z-1/2'
 '-x-1/2, y-1/2, z'
 
_cell_length_a                    15.6899(5)
_cell_length_b                    10.7161(3)
_cell_length_c                    11.3062(4)
_cell_angle_alpha                 90
_cell_angle_beta                  90
_cell_angle_gamma                 90
_cell_volume                      1900.96(11)
_cell_formula_units_Z             4
_cell_measurement_temperature     100(2)
_cell_measurement_reflns_used     9590
_cell_measurement_theta_min       2.82
_cell_measurement_theta_max       68.22
 
_exptl_crystal_description        BLOCK
_exptl_crystal_colour             BLUE
_exptl_crystal_density_meas       ?
_exptl_crystal_density_method     ?
_exptl_crystal_density_diffrn     1.488          
_exptl_crystal_F_000              892
_exptl_transmission_factor_min    ?
_exptl_transmission_factor_max    ?
_exptl_crystal_size_max           0.320
_exptl_crystal_size_mid           0.150
_exptl_crystal_size_min           0.140
_exptl_absorpt_coefficient_mu     1.897
_shelx_estimated_absorpt_T_min    0.582
_shelx_estimated_absorpt_T_max    0.777
_exptl_absorpt_correction_type    multi-scan
_exptl_absorpt_correction_T_min   0.6584
_exptl_absorpt_correction_T_max   0.7531
_exptl_absorpt_process_details    
;
SADABS-2016/2 (Bruker,2016/2) was used for absorption correction.
wR2(int) was 0.0875 before and 0.0584 after correction.
The Ratio of minimum to maximum transmission is 0.8743.
The \l/2 correction factor is Not present.
;
_exptl_absorpt_special_details    ?
_diffrn_ambient_temperature       100(2)
_diffrn_radiation_wavelength      1.54178
_diffrn_radiation_type            CuK\a
_diffrn_source                    ?
_diffrn_measurement_device_type   'Bruker D8 Venture'
_diffrn_measurement_method        '\f and \w scans'
_diffrn_detector_area_resol_mean  ?
_diffrn_reflns_number             29490
_diffrn_reflns_av_unetI/netI      0.0214
_diffrn_reflns_av_R_equivalents   0.0509
_diffrn_reflns_limit_h_min        -18
_diffrn_reflns_limit_h_max        18
_diffrn_reflns_limit_k_min        -12
_diffrn_reflns_limit_k_max        12
_diffrn_reflns_limit_l_min        -13
_diffrn_reflns_limit_l_max        13
_diffrn_reflns_theta_min          6.351
_diffrn_reflns_theta_max          68.325
_diffrn_reflns_theta_full         67.679
_diffrn_measured_fraction_theta_max   0.988
_diffrn_measured_fraction_theta_full  0.988
_diffrn_reflns_Laue_measured_fraction_max    0.988
_diffrn_reflns_Laue_measured_fraction_full   0.988
_diffrn_reflns_point_group_measured_fraction_max   0.988
_diffrn_reflns_point_group_measured_fraction_full  0.988
_reflns_number_total              1721
_reflns_number_gt                 1696
_reflns_threshold_expression      'I > 2\s(I)'
_reflns_Friedel_coverage          0.000
_reflns_Friedel_fraction_max      .
_reflns_Friedel_fraction_full     .
 
_reflns_special_details
;
 Reflections were merged by SHELXL according to the crystal
 class for the calculation of statistics and refinement.
 
 _reflns_Friedel_fraction is defined as the number of unique
 Friedel pairs measured divided by the number that would be
 possible theoretically, ignoring centric projections and
 systematic absences.
;
 
_computing_data_collection        ?
_computing_cell_refinement        ?
_computing_data_reduction         ?
_computing_structure_solution     ?
_computing_structure_refinement 'SHELXL-2018/3 (Sheldrick, 2018)'
_computing_molecular_graphics     ?
_computing_publication_material   ?
_refine_special_details           ?
_refine_ls_structure_factor_coef  Fsqd
_refine_ls_matrix_type            full
_refine_ls_weighting_scheme       calc
_refine_ls_weighting_details
'w=1/[\s^2^(Fo^2^)+(0.0690P)^2^+4.0042P] where P=(Fo^2^+2Fc^2^)/3'
_atom_sites_solution_primary      ?
_atom_sites_solution_secondary    ?
_atom_sites_solution_hydrogens    geom
_refine_ls_hydrogen_treatment     constr
_refine_ls_extinction_method      none
_refine_ls_extinction_coef        .
_refine_ls_number_reflns          1721
_refine_ls_number_parameters      126
_refine_ls_number_restraints      0
_refine_ls_R_factor_all           0.0482
_refine_ls_R_factor_gt            0.0475
_refine_ls_wR_factor_ref          0.1402
_refine_ls_wR_factor_gt           0.1395
_refine_ls_goodness_of_fit_ref    1.143
_refine_ls_restrained_S_all       1.143
_refine_ls_shift/su_max           0.000
_refine_ls_shift/su_mean          0.000
 
loop_
 _atom_site_label
 _atom_site_type_symbol
 _atom_site_fract_x
 _atom_site_fract_y
 _atom_site_fract_z
 _atom_site_U_iso_or_equiv
 _atom_site_adp_type
 _atom_site_occupancy
 _atom_site_site_symmetry_order  
 _atom_site_calc_flag
 _atom_site_refinement_flags_posn
 _atom_site_refinement_flags_adp
 _atom_site_refinement_flags_occupancy
 _atom_site_disorder_assembly
 _atom_site_disorder_group
Cu1 Cu 0.500000 0.58503(5) 0.250000 0.0164(2) Uani 1 2 d S T P . .
O1 O 0.57932(12) 0.72013(18) 0.30316(18) 0.0205(5) Uani 1 1 d . . . . .
O2 O 0.50686(13) 0.6576(2) 0.4592(2) 0.0257(5) Uani 1 1 d . . . . .
N1 N 0.40832(16) 0.4576(2) 0.2375(2) 0.0185(5) Uani 1 1 d . . . . .
N2 N 0.40725(15) 0.3636(2) 0.1568(2) 0.0193(5) Uani 1 1 d . . . . .
H2 H 0.448945 0.347409 0.107072 0.023 Uiso 1 1 calc R U . . .
C1 C 0.33415(19) 0.2986(3) 0.1630(3) 0.0213(6) Uani 1 1 d . . . . .
C6 C 0.55808(17) 0.7313(3) 0.4114(3) 0.0191(6) Uani 1 1 d . . . . .
C4 C 0.33448(18) 0.4491(3) 0.2966(3) 0.0206(6) Uani 1 1 d . . . . .
C3 C 0.2864(2) 0.3504(3) 0.2522(3) 0.0235(7) Uani 1 1 d . . . . .
H3 H 0.231639 0.324210 0.278224 0.028 Uiso 1 1 calc R U . . .
C7 C 0.5931(2) 0.8391(3) 0.4781(3) 0.0279(7) Uani 1 1 d . . . . .
H7 H 0.636698 0.887794 0.442328 0.034 Uiso 1 1 calc R U . . .
C2 C 0.3154(2) 0.1923(3) 0.0814(3) 0.0320(7) Uani 1 1 d . . . . .
H2A H 0.279394 0.221612 0.016231 0.048 Uiso 1 1 calc R U . . .
H2C H 0.285551 0.126359 0.124910 0.048 Uiso 1 1 calc R U . . .
H2B H 0.368912 0.159254 0.049541 0.048 Uiso 1 1 calc R U . . .
C5 C 0.3154(2) 0.5375(3) 0.3953(3) 0.0312(8) Uani 1 1 d . . . . .
H5B H 0.322834 0.494688 0.471240 0.047 Uiso 1 1 calc R U . . .
H5A H 0.256425 0.566871 0.388408 0.047 Uiso 1 1 calc R U . . .
H5C H 0.354287 0.608863 0.391121 0.047 Uiso 1 1 calc R U . . .
C8 C 0.5660(3) 0.8711(4) 0.5869(4) 0.0465(10) Uani 1 1 d . . . . .
H8 H 0.526960 0.815528 0.623773 0.056 Uiso 1 1 calc R U . . .
C9 C 0.5906(3) 0.9850(4) 0.6562(4) 0.0540(11) Uani 1 1 d . . . . .
H9C H 0.632766 1.033203 0.611450 0.081 Uiso 1 1 calc R U . . .
H9B H 0.615191 0.959588 0.732164 0.081 Uiso 1 1 calc R U . . .
H9A H 0.539999 1.036461 0.670210 0.081 Uiso 1 1 calc R U . . .
 
loop_
 _atom_site_aniso_label
 _atom_site_aniso_U_11
 _atom_site_aniso_U_22
 _atom_site_aniso_U_33
 _atom_site_aniso_U_23
 _atom_site_aniso_U_13
 _atom_site_aniso_U_12
Cu1 0.0161(4) 0.0178(4) 0.0151(4) 0.000 0.0006(2) 0.000
O1 0.0221(10) 0.0222(10) 0.0172(10) 0.0016(8) 0.0008(8) -0.0043(8)
O2 0.0290(11) 0.0272(12) 0.0210(11) -0.0010(9) 0.0042(8) -0.0096(9)
N1 0.0209(12) 0.0199(12) 0.0147(12) -0.0017(9) 0.0000(9) 0.0008(10)
N2 0.0223(12) 0.0192(12) 0.0164(11) -0.0021(9) 0.0009(9) 0.0017(9)
C1 0.0260(14) 0.0174(14) 0.0203(14) 0.0026(11) -0.0044(12) -0.0018(11)
C6 0.0188(13) 0.0192(14) 0.0194(14) 0.0026(11) -0.0029(11) 0.0003(11)
C4 0.0207(14) 0.0232(14) 0.0178(14) -0.0002(12) 0.0018(11) -0.0014(11)
C3 0.0214(15) 0.0244(15) 0.0245(16) 0.0018(12) 0.0009(11) -0.0038(12)
C7 0.0349(17) 0.0278(16) 0.0211(15) 0.0008(12) -0.0024(13) -0.0119(13)
C2 0.0394(18) 0.0257(16) 0.0310(17) -0.0083(14) -0.0008(14) -0.0053(14)
C5 0.0278(16) 0.0365(19) 0.0293(17) -0.0124(14) 0.0098(13) -0.0068(13)
C8 0.046(2) 0.045(2) 0.048(2) 0.0016(19) -0.0062(18) -0.0064(18)
C9 0.061(3) 0.056(3) 0.045(2) 0.002(2) -0.014(2) -0.005(2)
 
_geom_special_details
;
 All esds (except the esd in the dihedral angle between two l.s. planes)
 are estimated using the full covariance matrix.  The cell esds are taken
 into account individually in the estimation of esds in distances, angles
 and torsion angles; correlations between esds in cell parameters are only
 used when they are defined by crystal symmetry.  An approximate (isotropic)
 treatment of cell esds is used for estimating esds involving l.s. planes.
;
 
loop_
 _geom_bond_atom_site_label_1
 _geom_bond_atom_site_label_2
 _geom_bond_distance
 _geom_bond_site_symmetry_2
 _geom_bond_publ_flag
Cu1 N1 1.989(3) . ?
Cu1 N1 1.989(3) 3_655 ?
Cu1 O1 2.001(2) . ?
Cu1 O1 2.002(2) 3_655 ?
O1 C6 1.274(4) . ?
O2 C6 1.250(4) . ?
N1 C4 1.341(4) . ?
N1 N2 1.359(3) . ?
N2 C1 1.344(4) . ?
N2 H2 0.8800 . ?
C1 C3 1.373(4) . ?
C1 C2 1.495(4) . ?
C6 C7 1.486(4) . ?
C4 C3 1.393(4) . ?
C4 C5 1.495(4) . ?
C3 H3 0.9500 . ?
C7 C8 1.346(6) . ?
C7 H7 0.9500 . ?
C2 H2A 0.9800 . ?
C2 H2C 0.9800 . ?
C2 H2B 0.9800 . ?
C5 H5B 0.9800 . ?
C5 H5A 0.9800 . ?
C5 H5C 0.9800 . ?
C8 C9 1.501(6) . ?
C8 H8 0.9500 . ?
C9 H9C 0.9800 . ?
C9 H9B 0.9800 . ?
C9 H9A 0.9800 . ?
 
loop_
 _geom_angle_atom_site_label_1
 _geom_angle_atom_site_label_2
 _geom_angle_atom_site_label_3
 _geom_angle
 _geom_angle_site_symmetry_1
 _geom_angle_site_symmetry_3
 _geom_angle_publ_flag
N1 Cu1 N1 93.24(14) . 3_655 ?
N1 Cu1 O1 165.45(9) . . ?
N1 Cu1 O1 91.47(9) 3_655 . ?
N1 Cu1 O1 91.47(9) . 3_655 ?
N1 Cu1 O1 165.45(9) 3_655 3_655 ?
O1 Cu1 O1 87.34(12) . 3_655 ?
C6 O1 Cu1 101.16(17) . . ?
C4 N1 N2 105.9(2) . . ?
C4 N1 Cu1 129.5(2) . . ?
N2 N1 Cu1 124.46(19) . . ?
C1 N2 N1 111.1(2) . . ?
C1 N2 H2 124.5 . . ?
N1 N2 H2 124.5 . . ?
N2 C1 C3 107.1(3) . . ?
N2 C1 C2 122.1(3) . . ?
C3 C1 C2 130.8(3) . . ?
O2 C6 O1 121.6(3) . . ?
O2 C6 C7 120.7(3) . . ?
O1 C6 C7 117.6(3) . . ?
N1 C4 C3 109.9(3) . . ?
N1 C4 C5 120.2(3) . . ?
C3 C4 C5 129.9(3) . . ?
C1 C3 C4 106.0(3) . . ?
C1 C3 H3 127.0 . . ?
C4 C3 H3 127.0 . . ?
C8 C7 C6 123.0(3) . . ?
C8 C7 H7 118.5 . . ?
C6 C7 H7 118.5 . . ?
C1 C2 H2A 109.5 . . ?
C1 C2 H2C 109.5 . . ?
H2A C2 H2C 109.5 . . ?
C1 C2 H2B 109.5 . . ?
H2A C2 H2B 109.5 . . ?
H2C C2 H2B 109.5 . . ?
C4 C5 H5B 109.5 . . ?
C4 C5 H5A 109.5 . . ?
H5B C5 H5A 109.5 . . ?
C4 C5 H5C 109.5 . . ?
H5B C5 H5C 109.5 . . ?
H5A C5 H5C 109.5 . . ?
C7 C8 C9 127.0(4) . . ?
C7 C8 H8 116.5 . . ?
C9 C8 H8 116.5 . . ?
C8 C9 H9C 109.5 . . ?
C8 C9 H9B 109.5 . . ?
H9C C9 H9B 109.5 . . ?
C8 C9 H9A 109.5 . . ?
H9C C9 H9A 109.5 . . ?
H9B C9 H9A 109.5 . . ?
 
loop_
 _geom_torsion_atom_site_label_1
 _geom_torsion_atom_site_label_2
 _geom_torsion_atom_site_label_3
 _geom_torsion_atom_site_label_4
 _geom_torsion
 _geom_torsion_site_symmetry_1
 _geom_torsion_site_symmetry_2
 _geom_torsion_site_symmetry_3
 _geom_torsion_site_symmetry_4
 _geom_torsion_publ_flag
C4 N1 N2 C1 1.1(3) . . . . ?
Cu1 N1 N2 C1 -174.80(19) . . . . ?
N1 N2 C1 C3 -1.1(3) . . . . ?
N1 N2 C1 C2 178.1(3) . . . . ?
Cu1 O1 C6 O2 7.3(3) . . . . ?
Cu1 O1 C6 C7 -169.8(2) . . . . ?
N2 N1 C4 C3 -0.7(3) . . . . ?
Cu1 N1 C4 C3 174.9(2) . . . . ?
N2 N1 C4 C5 178.4(3) . . . . ?
Cu1 N1 C4 C5 -6.0(4) . . . . ?
N2 C1 C3 C4 0.6(3) . . . . ?
C2 C1 C3 C4 -178.5(3) . . . . ?
N1 C4 C3 C1 0.0(3) . . . . ?
C5 C4 C3 C1 -178.9(3) . . . . ?
O2 C6 C7 C8 -7.0(5) . . . . ?
O1 C6 C7 C8 170.1(3) . . . . ?
C6 C7 C8 C9 -173.3(4) . . . . ?
 
loop_
 _geom_hbond_atom_site_label_D 
 _geom_hbond_atom_site_label_H 
 _geom_hbond_atom_site_label_A 
 _geom_hbond_distance_DH 
 _geom_hbond_distance_HA 
 _geom_hbond_distance_DA 
 _geom_hbond_angle_DHA 
 _geom_hbond_site_symmetry_A 
 _geom_hbond_publ_flag
N2 H2 O2  0.88 1.90 2.736(3) 157.2 7_565 yes
 
_refine_diff_density_max    0.366
_refine_diff_density_min   -0.626
_refine_diff_density_rms    0.096

_shelx_res_file
;
TITL 1_a.res in Pbcn
    shelx.res
    created by SHELXL-2018/3 at 16:42:41 on 06-Jul-2022
CELL  1.54178  15.6899  10.7161  11.3062   90.000   90.000   90.000
ZERR     4.00   0.0005   0.0003   0.0004    0.000    0.000    0.000
LATT   1
SYMM  1/2 - X, 1/2 - Y, 1/2 + Z
SYMM  - X,   Y, 1/2 - Z
SYMM  1/2 + X, 1/2 - Y, - Z
SFAC  C    H    CU   N    O
UNIT  72 104 4 16 16
MERG   2
EQIV $1 +X,1-Y,-0.5+Z
HTAB  N2 O2_$1
MORE -1
FMAP   2
PLAN    5
SIZE     0.140   0.150   0.320
ACTA
BOND
BOND   $H
CONF
LIST   4
L.S.  10
TEMP  -173.15
WGHT    0.069000    4.004200
FVAR       0.62819
CU1   3    0.500000    0.585031    0.250000    10.50000    0.01613    0.01783 =
         0.01514    0.00000    0.00058    0.00000
O1    5    0.579320    0.720129    0.303160    11.00000    0.02214    0.02217 =
         0.01716    0.00161    0.00079   -0.00426
O2    5    0.506865    0.657566    0.459197    11.00000    0.02900    0.02724 =
         0.02098   -0.00102    0.00424   -0.00959
N1    4    0.408321    0.457565    0.237491    11.00000    0.02088    0.01991 =
         0.01468   -0.00171   -0.00004    0.00076
N2    4    0.407250    0.363576    0.156825    11.00000    0.02228    0.01924 =
         0.01643   -0.00210    0.00094    0.00171
AFIX  43
H2    2    0.448945    0.347409    0.107072    11.00000   -1.20000
AFIX   0
C1    1    0.334145    0.298562    0.163021    11.00000    0.02597    0.01745 =
         0.02033    0.00264   -0.00435   -0.00178
C6    1    0.558082    0.731272    0.411405    11.00000    0.01883    0.01922 =
         0.01939    0.00259   -0.00293    0.00029
C4    1    0.334479    0.449070    0.296611    11.00000    0.02073    0.02315 =
         0.01779   -0.00019    0.00178   -0.00135
C3    1    0.286361    0.350359    0.252166    11.00000    0.02144    0.02445 =
         0.02449    0.00180    0.00093   -0.00384
AFIX  43
H3    2    0.231639    0.324210    0.278224    11.00000   -1.20000
AFIX   0
C7    1    0.593132    0.839143    0.478087    11.00000    0.03486    0.02782 =
         0.02113    0.00078   -0.00237   -0.01191
AFIX  43
H7    2    0.636698    0.887794    0.442328    11.00000   -1.20000
AFIX   0
C2    1    0.315385    0.192295    0.081396    11.00000    0.03939    0.02571 =
         0.03103   -0.00827   -0.00079   -0.00526
AFIX 137
H2A   2    0.279394    0.221612    0.016231    11.00000   -1.50000
H2C   2    0.285551    0.126359    0.124910    11.00000   -1.50000
H2B   2    0.368912    0.159254    0.049541    11.00000   -1.50000
AFIX   0
C5    1    0.315361    0.537483    0.395343    11.00000    0.02784    0.03654 =
         0.02932   -0.01238    0.00977   -0.00685
AFIX 137
H5B   2    0.322834    0.494688    0.471240    11.00000   -1.50000
H5A   2    0.256425    0.566871    0.388408    11.00000   -1.50000
H5C   2    0.354287    0.608863    0.391121    11.00000   -1.50000
AFIX   0
C8    1    0.565953    0.871063    0.586876    11.00000    0.04580    0.04526 =
         0.04844    0.00162   -0.00624   -0.00643
AFIX  43
H8    2    0.526960    0.815528    0.623773    11.00000   -1.20000
AFIX   0
C9    1    0.590618    0.984966    0.656192    11.00000    0.06116    0.05607 =
         0.04491    0.00222   -0.01356   -0.00515
AFIX 137
H9C   2    0.632766    1.033203    0.611450    11.00000   -1.50000
H9B   2    0.615191    0.959588    0.732164    11.00000   -1.50000
H9A   2    0.539999    1.036461    0.670210    11.00000   -1.50000
AFIX   0
HKLF    4


REM  1_a.res in Pbcn
REM wR2 = 0.1402, GooF = S = 1.143, Restrained GooF = 1.143 for all data
REM R1 = 0.0475 for 1696 Fo > 4sig(Fo) and 0.0482 for all 1721 data
REM 126 parameters refined using 0 restraints

END

WGHT      0.0690      4.0042

REM Highest difference peak  0.366,  deepest hole -0.626,  1-sigma level  0.096
Q1    1   0.4458  0.5100  0.2536  11.00000  0.05    0.37
Q2    1   0.5730  0.7883  0.4351  11.00000  0.05    0.33
Q3    1   0.2992  0.4102  0.2620  11.00000  0.05    0.32
Q4    1   0.5930  0.9265  0.4206  11.00000  0.05    0.31
Q5    1   0.5593  0.6717  0.2725  11.00000  0.05    0.29
;
_shelx_res_checksum   55652

_shelx_hkl_file
;
   0  -1   0    5.40    1.10
   0  -2   0  255.07   10.70
   0  -3   0    1.30    2.50
   0  -3   0   -0.70    2.40
   0  -4   0  841.72   34.30
   0  -5   0    0.80    3.00
   0  -5   0    0.90    2.30
   0  -6   0   44.40    7.00
   0  -6   0   33.60    7.20
   0  -7   0    5.50    4.40
   0  -7   0   12.30    5.00
   0   7   0   -1.50    2.00
   0  -8   0  273.37   18.40
   0   8   0  283.87   15.30
   0  -8   0  291.77   19.80
   0  -8   0  271.87   22.20
   0  -8   0  282.27   18.40
   0  -9   0    3.30    5.30
   0  -9   0    0.50    7.10
   0  -9   0    1.90    4.70
   0 -10   0  128.89   15.70
   0 -10   0  141.49   17.50
   0 -10   0  153.88   15.30
   0  11   0    3.70    3.20
   0 -11   0    2.30    4.60
   0 -11   0    1.10    4.50
   0 -12   0    6.90    5.40
   0  -2  -1  172.08    8.10
   0  -2  -1  178.38    8.40
   0  -2  -1  180.88    8.00
   0  -3  -1    2.60    2.40
   0  -4  -1  295.87   14.30
   0  -4   1  276.37   14.60
   0  -5  -1    5.00    3.10
   0  -5   1    0.20    2.70
   0   5   1    2.30    1.80
   0   6   1   73.49    6.10
   0  -6   1   76.79   11.00
   0   6   1   77.09    6.30
   0  -6   1   74.89    7.80
   0  -7  -1    1.30    3.40
   0  -7  -1   -0.60    1.60
   0  -7   1    4.50    3.50
   0  -7   1    4.40    3.70
   0  -7   1    1.20    3.10
   0  -7   1    4.00    3.60
   0   7   1   -1.00    2.00
   0  -7   1    1.40    3.40
   0  -8  -1 3204.38  117.29
   0  -8  -1 3164.58  118.19
   0  -8  -1 3087.89  111.19
   0  -8  -1 2964.00  119.99
   0  -8   1 3185.48  118.69
   0  -8   1 3087.79  116.39
   0  -8   1 3128.49  118.79
   0  -8   1 3104.39  116.39
   0  -9  -1   -1.80    4.50
   0  -9  -1   -0.20    5.60
   0  -9  -1    6.70    5.10
   0   9   1   -1.20    2.70
   0  -9   1    0.40    4.20
   0  -9   1    4.50    4.20
   0  -9   1   -0.20    3.80
   0   9   1   -0.40    3.10
   0 -10  -1   98.89   14.50
   0 -10  -1  125.89   15.60
   0 -10  -1  118.09   15.90
   0 -10   1  132.19   15.50
   0  10   1  126.39    9.30
   0 -10   1   98.39   15.20
   0 -11  -1    5.50    5.70
   0 -11  -1    1.30    4.60
   0  11   1    6.40    5.00
   0 -11   1    0.00    3.90
   0 -11   1    5.40    5.30
   0  11   1    0.80    3.30
   0  11   1   12.00    4.00
   0 -12  -1   60.89   10.30
   0  12   1   48.30    6.90
   0  12   1   68.29    6.40
   0 -12   1   58.59    9.40
   0  12   1   85.69    8.30
   0  -1   2    2.00    3.80
   0  -3  -2    1.10    1.50
   0  -3   2    2.80    2.40
   0  -4  -2  113.19    8.00
   0  -4  -2  127.79    8.80
   0  -4   2  122.09    8.70
   0  -5  -2    0.20    2.80
   0  -5   2   -3.80    2.00
   0   5   2    2.90    2.40
   0  -6  -2 3674.53  129.89
   0   6   2 3470.05  126.29
   0   6   2 3795.52  127.49
   0  -6   2 3520.15  130.99
   0   6   2 3392.46  124.89
   0  -7  -2    1.50    3.10
   0  -7   2    0.80    2.30
   0  -7   2    8.10    6.80
   0  -7   2    1.60    3.50
   0  -7   2   -3.60    3.10
   0  -7   2    5.30    6.60
   0  -7   2    3.00    3.20
   0   7   2    1.40    2.70
   0   7   2   -1.80    2.50
   0  -8  -2  373.36   22.70
   0  -8  -2  360.66   22.70
   0  -8  -2  395.36   19.70
   0  -8   2  351.86   21.50
   0  -8   2  365.36   21.90
   0   8   2  339.47   21.80
   0   8   2  372.56   22.20
   0  -8   2  400.06   24.20
   0  -8   2  396.76   24.30
   0   8   2  366.46   20.10
   0  -8   2  342.27   24.00
   0  -8   2  374.36   23.10
   0  -8   2  392.96   22.50
   0   8   2  372.16   17.90
   0  -9  -2    0.90    4.10
   0  -9  -2    3.50    2.50
   0  -9  -2    2.60    5.20
   0  -9  -2   -0.10    5.60
   0   9   2    3.10    3.30
   0  -9   2    7.90    5.00
   0  -9   2    3.90    4.50
   0   9   2   -2.40    2.50
   0  -9   2    8.00    6.10
   0   9   2    1.80    3.00
   0 -10  -2  103.39   15.10
   0 -10  -2   60.39   11.30
   0 -10  -2   75.59   13.00
   0  10   2   67.99   10.90
   0  10   2   73.59    9.80
   0 -10   2   88.99   12.70
   0  10   2  109.39    9.00
   0 -10   2   85.69   16.70
   0 -10   2   93.59   13.00
   0 -10   2   95.49   14.80
   0 -11  -2   13.20    6.30
   0 -11  -2   -2.70    3.40
   0  11   2    0.20    3.10
   0 -11   2   -0.90    4.10
   0  11   2   -0.90    2.20
   0 -11   2    5.90    4.60
   0  11   2    4.20    4.00
   0 -12  -2    2.50    5.20
   0  12   2    5.20    3.60
   0  12   2    0.20    2.10
   0  12   2    4.40    2.90
   0 -12   2    1.00    3.90
   0  -1   3   -0.70    5.40
   0  -3   3    0.20    2.00
   0  -4  -3 1058.49   42.20
   0  -4  -3 1124.89   43.70
   0  -4   3 1239.18   44.70
   0  -5  -3    6.30    3.50
   0  -5   3    1.70    3.10
   0  -6  -3  621.04   29.30
   0  -6   3  563.34   29.10
   0   6   3  607.84   27.30
   0  -7  -3   -0.70    3.90
   0  -7  -3    6.20    4.30
   0  -7  -3    0.10    2.70
   0  -7   3   -0.30    3.50
   0  -7   3   -1.00    2.30
   0  -7   3    2.40    4.10
   0  -7   3    2.10    3.40
   0  -7   3    2.90    4.40
   0   7   3   -1.40    2.40
   0  -7   3    1.00    3.00
   0   7   3    1.40    2.70
   0  -7   3    6.90    4.50
   0  -8  -3 2994.30  106.29
   0  -8  -3 2896.01  108.99
   0   8   3 2902.31  106.79
   0  -8   3 2875.21  111.19
   0  -8   3 2795.52  111.89
   0   8   3 2777.32  106.79
   0  -8   3 2837.22  108.09
   0  -8   3 2838.72  109.69
   0  -8   3 2886.41  107.29
   0  -8   3 2816.42  110.99
   0  -8   3 2777.52  107.69
   0   8   3 2841.72  102.79
   0  -9  -3    6.20    5.40
   0  -9  -3   -3.70    3.30
   0  -9  -3   -1.70    2.90
   0  -9   3   -1.80    3.70
   0   9   3    2.10    2.90
   0   9   3    1.90    3.40
   0  -9   3   -0.20    4.30
   0  -9   3   -2.30    4.10
   0   9   3   -2.90    3.30
   0  -9   3    6.30    4.70
   0 -10  -3  589.94   31.60
   0 -10  -3  586.44   32.20
   0  10   3  523.45   28.60
   0  10   3  509.15   27.30
   0  10   3  540.15   27.40
   0 -10   3  532.05   28.70
   0 -10   3  556.64   31.10
   0 -10   3  567.94   29.40
   0 -10   3  548.05   34.80
   0  10   3  555.24   25.30
   0 -11  -3    5.80    5.70
   0 -11   3    0.40    4.70
   0  11   3   -0.30    3.50
   0  11   3    1.20    2.90
   0  11   3    5.90    3.60
   0 -12  -3   41.60    8.40
   0  12   3   33.10    5.10
   0  12   3   50.09    7.50
   0 -12   3   42.80    7.20
   0   3  -4    0.60    1.80
   0  -3   4   -1.60    2.20
   0   4  -4 1232.18   48.30
   0  -4   4 1228.38   48.10
   0   5  -4    1.70    2.50
   0  -5  -4    4.30    3.10
   0  -5   4   -3.80    2.40
   0   6  -4  514.85   24.10
   0  -6  -4  527.35   27.30
   0  -6  -4  617.04   34.50
   0  -6  -4  507.65   26.70
   0  -6   4  517.85   27.30
   0  -6   4  562.74   27.10
   0  -6   4  548.25   31.40
   0   6   4  552.64   28.00
   0  -6   4  525.15   27.80
   0  -6   4  502.45   25.90
   0  -7  -4    4.20    4.00
   0  -7  -4    1.40    4.30
   0  -7  -4   -0.40    3.20
   0   7   4    0.30    2.40
   0  -7   4   -0.70    3.00
   0  -7   4   -0.30    3.20
   0  -7   4   -0.40    2.50
   0   7   4    0.40    2.60
   0  -7   4   -0.50    4.30
   0  -7   4    0.50    3.50
   0   7   4   -3.30    1.60
   0  -7   4    3.40    4.20
   0  -7   4    0.90    4.10
   0  -8  -4  593.14   29.00
   0  -8   4  570.04   30.90
   0  -8   4  624.14   32.50
   0   8   4  514.95   32.50
   0  -8   4  567.04   29.70
   0  -8   4  538.25   33.00
   0  -8   4  589.94   30.10
   0   8   4  596.24   26.30
   0  -8   4  546.85   31.60
   0   8   4  569.24   29.20
   0  -8   4  573.24   30.60
   0  -8   4  545.55   25.70
   0  -9  -4    4.40    5.20
   0  -9  -4    5.10    4.00
   0  -9   4   10.60    6.70
   0  -9   4   -1.20    3.60
   0   9   4    2.60    3.50
   0  -9   4    1.80    3.90
   0   9   4    4.00    2.90
   0  -9   4    0.70    4.30
   0   9   4   -2.70    3.30
   0  -9   4    4.00    4.60
   0   9   4    1.80    3.50
   0 -10  -4   14.30    8.10
   0 -10  -4   28.90    5.50
   0 -10  -4   15.60    7.60
   0 -10   4   21.60    9.70
   0  10   4   24.10    6.20
   0 -10   4   37.60    8.70
   0 -10   4   24.00    7.80
   0  10   4   39.00    7.00
   0 -11  -4    3.80    5.30
   0 -11  -4   14.40    6.40
   0 -11   4    3.30    3.80
   0 -11   4    6.50    7.80
   0  11   4   -3.00    3.60
   0  11   4    1.20    2.90
   0  11   4    4.90    3.60
   0 -12  -4  453.15   24.30
   0  12   4  488.05   21.20
   0  12   4  465.55   21.40
   0   2  -5 3687.23  132.69
   0   3  -5    0.40    1.80
   0   3  -5    3.10    3.30
   0  -3   5    0.80    2.60
   0   4  -5   38.20    4.90
   0   4  -5   26.20    6.00
   0  -4   5   34.10    6.30
   0   5  -5    3.40    2.60
   0  -5   5    4.10    3.00
   0  -5   5    5.60    3.60
   0  -5   5    0.70    2.10
   0  -5   5    5.50    4.10
   0  -5   5    3.30    3.80
   0   6  -5  216.48   14.10
   0  -6  -5  204.48   15.50
   0   6   5  210.48   14.10
   0  -6   5  190.98   15.00
   0  -6   5  204.28   14.80
   0  -6   5  212.38   15.20
   0  -6   5  205.08   16.50
   0  -6   5  219.98   15.60
   0  -6   5  213.28   16.10
   0  -6   5  204.68   15.00
   0  -6   5  187.58   26.50
   0  -6   5  206.08   14.70
   0   6   5  221.68   14.90
   0  -7  -5   -0.60    3.30
   0  -7  -5    4.20    4.40
   0  -7   5   -3.50    2.80
   0   7   5    4.60    3.20
   0  -7   5    0.40    3.90
   0   7   5    3.70    3.70
   0  -7   5    6.30    4.10
   0  -7   5   -0.40    3.90
   0  -7   5   -0.70    3.60
   0  -7   5   -0.10    4.10
   0   7   5    1.20    3.00
   0  -7   5    3.00    4.10
   0  -7   5    4.10    3.80
   0  -8  -5 1205.28   51.69
   0  -8  -5 1165.28   55.29
   0  -8   5 1228.58   52.29
   0  -8   5 1171.08   50.29
   0  -8   5 1241.48   52.19
   0  -8   5 1116.49   54.79
   0  -8   5 1181.88   53.39
   0   8   5 1187.68   50.39
   0   8   5 1216.58   50.79
   0  -8   5 1225.98   48.20
   0   8   5 1186.68   52.79
   0  -8   5 1207.98   54.09
   0  -9  -5    0.20    3.50
   0  -9  -5    0.30    4.30
   0  -9   5   -1.90    3.30
   0  -9   5    1.70    4.60
   0  -9   5   -1.70    6.10
   0   9   5   -2.00    2.80
   0   9   5    3.60    3.70
   0  -9   5   -3.20    4.50
   0  -9   5    5.40    4.80
   0  -9   5   -1.10    3.00
   0 -10  -5  252.27   15.20
   0 -10  -5  266.27   19.10
   0 -10   5  234.48   16.00
   0 -10   5  237.28   18.10
   0 -10   5  245.18   21.40
   0  10   5  258.17   16.00
   0 -10   5  233.58   17.10
   0 -11  -5    5.50    4.80
   0 -11  -5   11.10    5.40
   0  11   5    3.10    3.50
   0  11   5   -0.40    2.20
   0 -12  -5    0.80    3.80
   0  12   5    0.30    3.30
   0  12   5    0.40    2.60
   0   2  -6 1035.60   43.20
   0   2  -6 1080.99   39.20
   0  -2   6 1000.00   39.50
   0  -2   6  907.81   38.30
   0   3  -6    0.90    2.00
   0   3  -6   -0.30    2.90
   0  -3   6    2.80    2.80
   0   4  -6  289.67   18.00
   0  -4   6  275.77   18.00
   0  -4   6  280.47   17.70
   0  -4   6  273.77   16.40
   0  -4   6  276.97   17.80
   0  -4   6  287.07   18.00
   0  -4   6  282.07   16.30
   0  -4   6  281.47   18.00
   0  -5   6    7.60    4.10
   0  -5   6   -0.50    2.30
   0  -5   6    5.40    4.10
   0  -5   6   11.10    5.10
   0  -5   6    6.50    4.20
   0  -5   6   -2.90    2.40
   0  -5   6    3.30    3.60
   0  -5   6    3.60    3.40
   0   6  -6 1335.57   56.49
   0  -6  -6 1365.86   58.49
   0  -6   6 1281.37   60.19
   0  -6   6 1430.56   59.09
   0   6   6 1308.57   56.89
   0  -6   6 1258.57   53.99
   0  -6   6 1403.76   56.89
   0  -6   6 1317.97   57.19
   0  -6   6 1372.06   57.29
   0  -6   6 1355.26   55.79
   0  -6   6 1395.06   57.39
   0  -6   6 1359.16   54.59
   0   6   6 1424.26   55.69
   0  -7  -6   -3.40    3.50
   0  -7  -6    8.70    6.40
   0  -7   6    6.10    3.80
   0  -7   6    0.40    3.40
   0  -7   6    4.10    4.40
   0  -7   6    4.20    3.90
   0  -7   6    4.00    4.30
   0  -7   6    3.10    4.00
   0  -7   6    3.70    4.50
   0   7   6    1.10    3.80
   0   7   6    5.30    4.20
   0  -7   6    6.90    4.50
   0  -7   6   -2.00    4.30
   0  -8  -6  139.99   18.90
   0  -8  -6  144.99   13.60
   0  -8   6  152.38   14.30
   0  -8   6  141.69   14.90
   0  -8   6  168.78   18.80
   0  -8   6  140.19   12.00
   0  -8   6  147.29   11.60
   0   8   6  168.28   13.00
   0  -8   6  201.08   14.00
   0  -8   6  144.79   13.90
   0   8   6  143.29   13.60
   0  -8   6  167.78   14.30
   0  -8   6  138.79   14.30
   0  -9  -6    1.30    4.60
   0  -9  -6    2.80    4.10
   0  -9   6    1.90    3.70
   0  -9   6    4.00    4.90
   0  -9   6    0.80    3.30
   0  -9   6    3.10    3.90
   0  -9   6    3.00    2.80
   0  -9   6   -1.70    6.80
   0   9   6   -2.10    2.60
   0  -9   6    0.10    3.80
   0 -10  -6    1.30    4.20
   0 -10  -6    0.40    3.10
   0 -10   6    3.50    5.70
   0  10   6    6.90    4.30
   0 -10   6   -5.80    3.70
   0  10   6    3.40    2.80
   0 -10   6    1.80    3.90
   0 -11  -6    2.50    4.10
   0  11   6   -1.10    3.20
   0  11   6    2.10    2.60
   0  -2   7 1325.17   53.79
   0  -2   7 1273.07   53.09
   0  -2   7 1263.17   56.89
   0  -2   7 1183.88   48.80
   0  -2   7 1305.17   53.59
   0   3  -7   -5.00    2.50
   0   3  -7    1.00    2.50
   0   3  -7    2.30    2.60
   0  -3   7    6.90    3.20
   0  -3   7   -0.90    2.90
   0  -3   7    2.10    5.40
   0  -3   7    3.80    3.00
   0  -3   7    7.30    4.80
   0  -3   7    2.60    3.40
   0   4  -7  994.50   44.40
   0  -4   7  970.10   42.20
   0  -4   7  987.80   47.70
   0  -4   7  957.00   40.80
   0  -4   7  973.50   43.90
   0  -4   7  955.10   43.70
   0  -4   7  964.40   41.10
   0  -4   7  987.70   43.60
   0  -4   7  904.21   41.00
   0  -4   7  920.01   43.30
   0   5  -7    7.00    4.30
   0  -5   7    1.10    4.10
   0  -5   7    3.80    3.90
   0   5   7    0.60    2.50
   0  -5   7    7.90    4.60
   0  -5   7    3.60    4.80
   0  -5   7    0.00    2.80
   0  -5   7    0.60    3.10
   0  -5   7    1.10    4.20
   0  -5   7    4.30    3.50
   0  -5   7    0.70    3.70
   0   6  -7    5.90    4.30
   0   6   7    5.50    3.70
   0  -6   7    6.40    4.50
   0  -6   7    6.80    4.20
   0  -6   7   12.10    4.90
   0  -6   7    1.30    4.50
   0  -6   7    1.60    4.50
   0  -6   7    0.40    2.70
   0  -6   7   17.10    9.30
   0   6   7    2.50    3.60
   0  -6   7   11.50    4.70
   0  -6   7   -4.20    3.90
   0  -7  -7    6.50    5.50
   0  -7  -7    5.00    4.80
   0  -7   7    1.70    3.90
   0  -7   7   -2.00    3.70
   0  -7   7   -6.90    3.30
   0  -7   7    7.00    4.00
   0   7   7    0.80    3.70
   0   7   7    1.10    3.10
   0  -7   7   -2.00    3.90
   0  -7   7    3.60    4.00
   0  -7   7    5.80    5.20
   0  -7   7    1.10    3.20
   0  -7   7    2.50    3.40
   0  -8  -7  788.72   37.40
   0  -8   7  738.13   40.20
   0  -8   7  698.53   34.20
   0  -8   7  776.62   36.30
   0  -8   7  698.23   35.50
   0  -8   7  788.12   37.40
   0  -8   7  727.13   38.00
   0   8   7  798.82   34.80
   0  -8   7  722.73   32.90
   0  -8   7  755.02   33.90
   0  -9  -7   -1.60    3.30
   0  -9  -7    1.70    4.40
   0   9   7   -1.90    2.80
   0  -9   7    1.40    4.50
   0  -9   7    7.10    4.10
   0  -9   7    4.60    4.00
   0  -9   7   -0.30    5.10
   0  -9   7    7.50    3.40
   0  -9   7   -1.40    3.60
   0  -9   7   -1.10    3.70
   0 -10  -7  155.28   15.00
   0  10   7  157.98   13.50
   0 -10   7  172.48   14.30
   0 -10   7  167.08   14.10
   0 -11  -7   -3.40    3.10
   0  11   7   -0.30    1.90
   0  11   7    2.30    3.00
   0   0   8  675.83   33.40
   0  -1   8    2.00    3.10
   0  -1   8    8.60    4.10
   0  -1   8   -0.90    2.10
   0   2  -8 1695.63   66.49
   0  -2   8 1674.43   68.79
   0  -2   8 1673.03   66.39
   0  -2   8 1785.92   69.99
   0  -2   8 1697.33   69.29
   0   3  -8   -1.50    2.50
   0   3  -8    6.60    3.70
   0  -3   8   -1.10    3.00
   0  -3   8    5.40    4.70
   0  -3   8    8.30    4.10
   0  -3   8    2.40    2.50
   0  -3   8    0.70    3.00
   0  -3   8    1.90    3.30
   0  -3   8    2.40    4.10
   0  -3   8    4.60    4.00
   0   4  -8  718.03   36.90
   0   4  -8  672.13   30.30
   0  -4   8  713.03   35.40
   0  -4   8  732.33   39.50
   0  -4   8  717.83   36.00
   0  -4   8  766.62   37.40
   0  -4   8  701.03   33.70
   0  -4   8  722.43   35.80
   0  -4   8  695.33   33.30
   0   5  -8    3.10    3.70
   0  -5   8   -4.20    2.00
   0  -5   8   -2.90    3.20
   0  -5   8    0.80    4.50
   0  -5   8    2.70    4.40
   0  -5   8    0.80    3.70
   0  -5   8   -1.50    4.40
   0  -5   8   -3.50    3.30
   0   6  -8  344.07   26.00
   0  -6  -8  303.17   16.80
   0  -6   8  328.67   20.20
   0  -6   8  334.77   21.40
   0  -6   8  321.77   20.20
   0  -6   8  319.57   21.00
   0  -6   8  291.67   18.60
   0  -6   8  309.57   21.80
   0  -7  -8    3.30    4.80
   0  -7  -8   -3.40    2.90
   0  -7   8    3.10    3.80
   0  -7   8   -2.20    2.70
   0  -7   8    1.70    4.10
   0  -7   8   -1.90    2.20
   0  -7   8    1.10    3.60
   0  -7   8    0.90    4.50
   0  -7   8    3.70    4.30
   0   7   8    2.40    2.80
   0  -8  -8   45.30    9.00
   0   8   8   55.29    7.70
   0  -8   8   46.30    9.60
   0  -8   8   42.30   10.20
   0  -8   8   29.30    7.40
   0  -8   8   62.59   10.00
   0  -8   8   46.40    7.40
   0  -8   8   60.29   10.30
   0  -9  -8   -4.80    3.40
   0  -9  -8   -2.90    3.10
   0  -9   8    3.10    3.40
   0  -9   8   -2.90    3.80
   0   9   8   -3.50    2.30
   0  -9   8   -3.00    2.70
   0  -9   8   11.00    6.20
   0 -10  -8   13.10    4.80
   0 -10  -8    9.30    3.90
   0 -10   8    3.60    3.50
   0  10   8    1.50    2.40
   0   0   9    3.70    3.50
   0   0   9   -0.10    2.80
   0  -1   9   11.90    5.20
   0  -1   9    2.70    3.50
   0   1   9    2.10    3.80
   0  -1   9    5.20    4.30
   0   2  -9   13.30    4.90
   0   2  -9    1.60    3.80
   0  -2   9    5.20    4.00
   0  -2   9    8.50    4.80
   0  -2   9    5.30    4.10
   0   3  -9    9.10    4.60
   0   3  -9   -0.90    3.20
   0   3  -9    0.60    3.80
   0  -3   9    1.20    2.20
   0  -3   9    1.90    4.40
   0  -3   9    3.50    4.40
   0  -3   9   -3.90    2.70
   0  -3   9   -1.50    3.10
   0   4  -9 1848.72   70.39
   0   4  -9 1876.71   78.59
   0  -4   9 1876.31   72.89
   0  -4   9 1778.72   73.29
   0  -4   9 1817.22   72.99
   0   4   9 1840.52   68.99
   0  -4   9 1770.42   75.79
   0  -4   9 1910.71   76.59
   0  -4   9 1941.31   76.39
   0  -5  -9    1.30    4.70
   0   5  -9   10.40    6.00
   0  -5   9    8.80    5.10
   0  -5   9    3.90    4.20
   0  -5   9    1.40    4.20
   0  -5   9   -3.70    3.00
   0   5   9    3.50    3.20
   0  -5   9    5.40    4.30
   0  -5   9   -0.20    3.50
   0  -6  -9   91.29   13.00
   0  -6   9   89.39   12.40
   0  -6   9   87.09   11.00
   0  -6   9   94.49   13.80
   0  -6   9   95.49   12.70
   0  -6   9   96.49   12.70
   0   6   9  100.19    8.90
   0  -6   9  100.59   13.00
   0  -7  -9   -1.00    3.80
   0   7   9    0.80    3.00
   0  -7   9    1.70    3.40
   0  -7   9    1.30    4.40
   0  -7   9    1.20    2.70
   0  -7   9   -1.80    3.20
   0  -7   9    5.30    5.80
   0  -7   9   -1.70    2.80
   0  -7   9    1.00    3.70
   0  -8  -9  146.49   13.40
   0  -8   9  145.49   12.20
   0   8   9  158.78   10.60
   0  -8   9  175.88   13.30
   0  -8   9  188.08   15.20
   0  -8   9  153.48   12.80
   0  -8   9  154.48   10.90
   0  -8   9  149.79   13.00
   0  -9  -9    5.00    4.20
   0  -9   9    5.20    3.60
   0  -9   9   -0.80    3.10
   0  -9   9    6.70    4.50
   0   0  10  880.01   40.80
   0   0  10  781.42   38.50
   0   1 -10   -1.10    3.00
   0  -1  10    8.20    5.20
   0   1  10    2.90    4.20
   0  -1  10    0.30    3.90
   0  -1  10    0.60    3.60
   0   2 -10  303.87   20.00
   0   2 -10  302.27   19.00
   0  -2  10  298.27   18.50
   0  -2  10  333.37   21.20
   0  -2  10  288.67   20.20
   0  -2  10  311.17   20.90
   0   2  10  311.27   20.80
   0   3 -10    2.60    3.60
   0   3 -10   11.30    5.80
   0   3 -10    3.50    3.70
   0  -3  10    1.10    3.60
   0  -3  10    0.80    3.70
   0  -3  10   -0.40    2.90
   0  -3  10    2.80    3.80
   0   3  10    3.20    4.20
   0  -3  10    1.00    3.30
   0  -3  10    5.10    4.30
   0   4 -10  955.70   48.80
   0   4 -10 1007.60   39.10
   0   4 -10  876.21   40.20
   0  -4  10  969.90   42.00
   0  -4  10  955.50   42.10
   0  -4  10  996.70   44.70
   0  -4  10 1019.90   45.90
   0  -4  10  935.61   44.40
   0  -4  10  962.00   41.80
   0  -5  10    5.60    3.80
   0  -5  10    1.00    3.40
   0  -5  10   -4.30    3.00
   0  -5  10    7.30    4.50
   0  -5  10    0.40    2.30
   0  -5  10   -0.10    4.00
   0  -5  10    4.30    4.60
   0  -6 -10    1.60    4.20
   0  -6  10    8.50    5.40
   0  -6  10    0.10    3.00
   0  -6  10    3.70    4.10
   0  -6  10    5.20    4.40
   0  -6  10    9.10    4.70
   0  -6  10   -1.80    2.70
   0  -7 -10    1.10    5.00
   0  -7  10    3.80    3.60
   0  -7  10    1.70    3.40
   0  -7  10   12.50    5.80
   0  -7  10   -1.90    2.60
   0  -7  10   -1.40    3.00
   0  -8 -10    7.00    4.70
   0  -8  10   10.60    4.20
   0  -8  10   10.30    4.90
   0  -8  10    8.50    3.30
   0  -8  10    1.50    3.20
   0   0  11    2.00    3.70
   0   0  11    8.60    5.00
   0   1 -11    4.00    4.30
   0  -1  11    4.10    3.40
   0  -1  11    0.40    3.90
   0   1  11    5.10    4.60
   0  -1  11    0.10    3.50
   0   2 -11   58.79    9.50
   0  -2 -11   67.29   10.30
   0  -2  11   35.50    8.00
   0  -2  11   32.20    8.40
   0  -2  11   35.80    6.60
   0   2  11   51.79    9.60
   0  -2  11   46.30    8.30
   0   3 -11    5.60    4.50
   0   3 -11    5.70    4.80
   0  -3  11   -0.30    3.50
   0  -3  11    6.70    4.80
   0   3  11    2.60    3.90
   0  -3  11    4.90    3.20
   0  -3  11    3.90    4.00
   0  -3  11   13.60    5.00
   0   4 -11  647.94   30.20
   0   4 -11  649.14   29.90
   0   4 -11  649.24   28.10
   0  -4  11  671.03   29.10
   0  -4  11  639.54   31.70
   0  -4  11  612.84   29.00
   0  -4  11  599.04   31.70
   0  -4  11  619.34   29.10
   0   5 -11    6.10    4.90
   0  -5  11    6.00    4.20
   0  -5  11   14.10    6.60
   0  -5  11   -0.90    3.00
   0  -5  11   -0.50    3.40
   0  -5  11   -3.10    3.50
   0   5  11    0.60    3.30
   0  -5  11    4.00    3.30
   0  -6 -11    7.10    5.00
   0  -6  11    6.20    3.70
   0  -6  11    3.70    3.90
   0  -6  11   12.70    4.30
   0  -6  11    7.10    3.80
   0  -7 -11    6.10    3.90
   0  -7  11    0.20    2.70
   0  -7  11   -1.90    2.60
   0   7  11    2.00    2.20
   0  -7  11   10.70    7.00
   0  -7  11    2.60    3.00
   0   0 -12 1162.58   47.60
   0   0  12 1101.69   49.20
   0   0  12 1136.59   48.40
   0   0  12 1177.28   45.80
   0   1 -12    1.50    3.80
   0   1  12    3.30    3.70
   0  -1  12   -2.30    3.20
   0   1  12   -1.90    3.50
   0  -1  12    2.30    2.40
   0  -1  12   -0.10    3.10
   0   2 -12   16.40    5.90
   0   2  12   25.60    6.50
   0   2  12   16.20    5.30
   0  -2  12   19.20    5.80
   0  -2  12   26.70    6.80
   0   3 -12    7.60    4.00
   0  -3  12    0.50    3.80
   0   3  12    0.60    2.80
   0  -3  12    3.90    3.80
   0   4 -12   99.59   10.10
   0   4 -12  102.49   16.70
   0  -4  12   86.69    8.90
   0  -4  12   94.79    8.80
   0  -4  12  100.79    9.90
   0  -4  12   96.89    7.60
   0   4  12  107.09    9.00
   0   5 -12   14.30    5.40
   0  -5  12   -1.80    2.80
   0  -5  12   -0.60    3.40
   0   5  12    2.90    2.40
   0  -5  12   -2.90    2.70
   0  -6 -12  106.39    9.50
   0  -6  12  104.29    8.20
   0   6  12  108.79    9.90
   0  -6  12  114.99    9.00
   0  -6  12  111.19    7.90
   0   0 -13    3.10    3.50
   0   0  13    1.10    3.00
   0   0  13    3.90    3.20
   0   1 -13   -5.30    2.80
   0  -1 -13   -0.40    3.20
   0   1  13    3.20    2.70
   0   1  13    5.50    3.80
   0  -1  13   -1.90    3.10
   0  -1  13    4.30    3.10
   0   1  13    9.00    3.20
   0  -2 -13   52.69    7.50
   0   2 -13   65.19    7.80
   0   2  13   52.69    6.40
   0  -2  13   56.99    7.30
   0   2  13   47.30    7.00
   0  -2  13   47.60    6.90
   0   2  13   67.99    6.60
   0   3 -13    6.40    3.50
   0   3  13    7.50    3.10
   0   3  13    2.10    2.50
   0  -3  13   -0.80    2.20
   0   3  13   -0.80    2.30
   0  -3  13    0.50    2.80
   1 -12   0   -0.10    3.90
  -1  12   0    5.60    3.80
  -1  11   0   66.59    7.60
   1 -11   0   64.59   10.60
   1 -11   0   62.39   11.00
  -1  11   0   53.29    9.60
   1 -10   0   -1.60    4.50
  -1  10   0    1.00    2.30
   1 -10   0    1.40    4.40
   1  -9   0    4.00    4.70
   1  -9   0    6.80    5.20
  -1   9   0    7.60    3.90
  -1   9   0   12.10    5.00
   1  -8   0   -1.30    5.00
   1  -8   0    6.20    4.70
   1  -8   0    1.20    4.30
  -1   8   0    2.40    2.80
   1  -8   0    5.10    4.30
   1  -7   0 2179.58   83.69
   1  -7   0 2210.88   86.89
   1  -6   0   -3.40    2.90
  -1   6   0    1.20    2.00
   1  -5   0  329.57   18.10
   1  -4   0    4.20    2.90
   1  -3   0 1350.86   49.90
   1   0   0   14.60    1.10
  -1  -2   0    2.10    5.40
  -1  -3   0 1421.86   52.59
  -1  -4   0    4.00    2.90
  -1  -5   0  282.77   16.40
  -1  -5   0  310.47   16.80
  -1  -5   0  286.87   14.70
  -1  -6   0    4.20    2.80
  -1  -7   0 1995.90   79.09
  -1  -7   0 1953.40   78.09
  -1  -7   0 2150.18   81.49
  -1  -7   0 2123.79   78.79
  -1  -7   0 2098.29   79.49
  -1  -8   0    8.70    4.50
  -1  -8   0   -1.70    4.50
  -1  -8   0    1.70    6.10
  -1  -8   0    3.20    4.20
  -1  -8   0    0.80    4.40
  -1  -9   0    4.90    5.50
  -1  -9   0    7.90    7.00
  -1  -9   0   12.40    6.30
  -1 -10   0    3.90    4.80
  -1 -10   0   10.20    5.90
  -1 -10   0    2.40    5.20
  -1 -11   0   50.49    9.60
  -1 -11   0   42.90    9.10
  -1 -11   0   73.49   12.90
  -1 -12   0    5.20    5.90
   1  12   0    5.80    4.20
   1 -12  -1    3.00    4.30
  -1  12   1    2.40    3.20
  -1  12   1    9.90    3.70
   1 -12   1   -1.80    4.60
  -1  12   1    8.70    3.40
   1 -11  -1  154.68   15.00
   1 -11  -1  147.89   13.90
  -1  11   1  153.08   10.80
   1 -11   1  155.88   14.00
  -1  11   1  159.08   12.10
   1 -11   1  169.68   15.50
   1 -10  -1   14.40    6.40
   1 -10  -1   12.00    6.70
   1 -10  -1    1.80    4.30
   1 -10   1   20.40    7.60
  -1  10   1   17.20    4.90
  -1  10   1   14.00    5.00
  -1  10   1   17.50    4.90
   1 -10   1   25.80    8.20
   1  -9  -1 1308.87   58.09
   1  -9  -1 1370.16   57.19
   1  -9   1 1302.07   57.99
   1  -9   1 1291.47   55.99
   1  -9   1 1354.86   56.89
  -1   9   1 1344.27   54.19
   1  -8  -1  163.98   14.40
   1  -8  -1  166.98   14.30
   1  -8  -1  165.08   16.50
   1  -8  -1  155.48   10.80
   1  -8   1  172.08   14.90
   1  -8   1  188.98   16.60
   1  -8   1  158.98   14.20
  -1   8   1  168.78   11.90
   1  -8   1  160.48   13.50
   1  -8   1  160.58   13.90
  -1   8   1  179.78   10.70
   1  -7  -1 1458.75   59.89
   1  -7  -1 1489.15   57.09
   1  -7   1 1387.06   59.09
  -1   7   1 1427.56   54.79
  -1   7   1 1620.74   57.09
   1  -7   1 1521.05   62.19
   1  -7   1 1463.15   59.39
   1  -7   1 1527.45   63.39
   1  -7   1 1506.05   61.89
   1  -6  -1   94.19   12.20
   1  -6   1  100.79   10.10
  -1   6   1   95.39    7.10
   1  -5  -1  996.10   40.70
   1  -5  -1  948.61   38.00
  -1   5   1  940.11   36.20
   1  -5   1  943.41   39.60
   1  -4  -1  225.88   13.20
   1  -4  -1  241.18   11.80
   1  -4   1  205.48   12.20
   1  -3  -1   50.09    4.50
   1  -3   1   32.10    4.70
   1  -2  -1  501.65   18.40
   1  -2  -1  471.35   17.90
  -1   1  -1  989.10   32.90
   1  -1  -1  857.81   32.60
  -1   0   1    0.50    0.70
  -1   0   1    1.50    0.80
  -1  -1   1 1085.19   37.90
  -1  -3   1   41.10    5.20
  -1  -4  -1  230.28   12.60
  -1  -4   1  220.68   12.70
  -1  -5  -1  794.52   32.90
  -1  -5   1  800.22   31.80
  -1  -6  -1  102.39    9.10
   1   6   1  110.29    7.70
  -1  -6   1   92.09    8.00
   1   6   1  110.29    7.30
  -1  -6   1  112.19   10.70
  -1  -6   1   89.89    9.70
  -1  -7  -1 1325.77   56.99
  -1  -7  -1 1487.15   58.39
  -1  -7  -1 1436.36   54.29
  -1  -7  -1 1494.65   59.59
  -1  -7   1 1436.96   57.79
  -1  -7   1 1437.46   56.19
  -1  -7   1 1469.15   59.99
   1   7   1 1352.96   54.09
  -1  -7   1 1455.95   59.39
  -1  -7   1 1434.36   57.59
  -1  -8  -1  170.78   14.50
  -1  -8  -1  194.78   18.10
  -1  -8  -1  166.28   15.20
  -1  -8   1  187.68   14.70
  -1  -8   1  193.98   16.20
   1   8   1  183.48   12.20
  -1  -8   1  167.98   16.60
  -1  -8   1  160.78   13.90
  -1  -9  -1 1344.87   58.69
  -1  -9  -1 1284.77   56.39
  -1  -9  -1 1377.16   60.99
  -1  -9   1 1282.07   55.89
  -1  -9   1 1362.46   56.49
  -1  -9   1 1268.57   61.19
   1   9   1 1320.87   53.49
  -1  -9   1 1263.87   62.99
  -1  -9   1 1346.37   59.49
   1   9   1 1349.07   50.49
  -1 -10  -1   20.90    8.70
  -1 -10  -1    5.50    5.30
  -1 -10  -1    8.70    6.30
  -1 -10   1   17.20    6.40
  -1 -10   1   21.10    8.10
   1  10   1   16.80    7.00
   1  10   1   25.80    5.40
  -1 -10   1   25.90    7.60
  -1 -11  -1  160.18   14.60
  -1 -11  -1  180.58   16.30
   1  11   1  150.28   10.20
  -1 -11   1  147.79   15.10
  -1 -11   1  160.48   13.90
   1  11   1  153.08   12.80
  -1 -12  -1    1.70    4.60
   1  12   1    5.00    3.00
  -1 -12   1    4.70    4.50
   1  12   1    4.30    3.30
   1 -12  -2   11.00    5.40
  -1  12   2    8.30    3.20
  -1  12   2    5.40    3.50
   1 -12   2   -0.10    3.50
  -1  12   2   10.30    3.40
   1 -11  -2   30.60    7.80
   1 -11  -2   48.50    9.90
  -1  11   2   42.90    7.50
   1 -11   2   48.90    9.60
   1 -11   2   60.59   10.20
  -1  11   2   48.50    9.10
  -1  11   2   54.39    7.50
   1 -10  -2   95.59   13.90
   1 -10  -2   79.79   12.50
   1 -10  -2   64.49   12.00
  -1  10   2   61.49    9.10
   1 -10   2  116.39   15.90
   1 -10   2   69.79   11.70
   1 -10   2   87.69   12.40
  -1  10   2   96.79    8.60
   1  -9  -2   17.10    7.80
   1  -9  -2   -0.70    3.80
   1  -9  -2    0.40    4.20
   1  -9  -2    3.00    2.90
   1  -9   2   11.40    5.90
   1  -9   2    6.90    5.20
  -1   9   2    3.50    3.70
   1  -9   2   11.20    5.90
  -1   9   2   -0.60    2.60
  -1   9   2   11.70    4.90
   1  -8  -2   11.90    6.00
   1  -8  -2   10.80    4.00
   1  -8   2   10.40    6.90
   1  -8   2   16.80    6.40
   1  -8   2   15.10    5.60
   1  -8   2    9.90    5.30
   1  -8   2    4.30    4.80
  -1   8   2    9.00    4.30
   1  -8   2    4.60    4.10
  -1   8   2   10.70    4.70
   1  -7  -2 1708.63   84.39
   1  -7   2 1841.72   85.99
   1  -7   2 1854.61   75.99
  -1   7   2 1911.71   70.99
   1  -7   2 1978.10   78.99
   1  -7   2 1845.82   76.19
   1  -7   2 1840.22   74.89
  -1   7   2 1908.41   68.59
   1  -6  -2   29.70    6.70
   1  -6   2   21.70    6.30
  -1   6   2   25.60    4.60
  -1   6   2   24.10    4.80
   1  -5  -2  983.30   39.80
  -1   5   2  979.60   38.30
   1  -5   2 1001.10   41.00
   1  -4  -2  150.48    9.40
   1  -4   2  129.39    9.40
   1  -3  -2  232.68   10.70
   1  -3  -2  232.78   10.60
   1  -3  -2  220.78   11.10
  -1   3  -2  227.68   10.60
   1  -3   2  225.88   11.70
  -1   0   2  757.62   27.10
  -1  -1   2 9261.37  318.37
  -1  -3   2  273.97   13.00
  -1  -4  -2  120.69    9.00
  -1  -4   2  150.08    9.30
  -1  -5  -2  911.11   40.30
  -1  -5  -2 1045.40   41.60
  -1  -5   2 1053.89   41.70
  -1  -6  -2   12.90    4.30
  -1  -6  -2   11.10    5.20
  -1  -6   2   27.10    4.90
  -1  -6   2   24.80    6.80
   1   6   2   16.50    4.00
  -1  -6   2   21.80    5.00
   1   6   2   21.10    4.40
  -1  -7  -2 1736.63   70.89
  -1  -7  -2 1697.63   72.79
  -1  -7   2 1829.22   73.69
  -1  -7   2 1794.02   70.39
  -1  -7   2 1905.91   71.19
   1   7   2 1995.30   69.39
  -1  -7   2 1858.91   73.39
  -1  -7   2 1894.81   73.79
   1   7   2 1765.92   65.89
  -1  -7   2 1717.93   68.09
  -1  -7   2 1710.43   75.49
  -1  -8  -2    6.60    5.20
  -1  -8  -2   13.30    4.00
  -1  -8  -2    9.00    5.70
  -1  -8   2    3.00    3.40
  -1  -8   2   21.00    7.80
   1   8   2    9.90    4.40
  -1  -8   2   12.40    5.60
   1   8   2   11.50    5.00
  -1  -8   2    7.40    4.90
   1   8   2   11.20    4.50
  -1  -8   2    3.40    3.90
  -1  -8   2   10.50    4.90
  -1  -8   2    4.00    4.70
  -1  -9  -2    0.80    4.60
  -1  -9  -2   12.80    7.40
  -1  -9  -2   13.30    6.70
  -1  -9   2    8.00    5.70
  -1  -9   2   10.80    6.40
   1   9   2    5.50    3.70
  -1  -9   2    8.40    5.70
   1   9   2    6.50    3.70
  -1  -9   2    2.40    5.10
  -1  -9   2    4.90    6.90
   1   9   2   10.60    4.80
  -1 -10  -2   98.09   13.70
  -1 -10  -2   86.79   13.70
  -1 -10  -2   93.79   15.00
  -1 -10   2   98.69   17.50
   1  10   2   72.49    9.70
   1  10   2  100.19    8.90
  -1 -10   2  104.99   13.20
   1  10   2  108.79   11.20
  -1 -10   2  102.29   15.60
  -1 -11  -2   50.39   10.00
  -1 -11  -2   47.70   10.60
  -1 -11   2   42.00    8.60
   1  11   2   62.09    9.70
  -1 -11   2   41.00    9.70
   1  11   2   58.79    8.00
   1  11   2   55.39    8.00
  -1 -12  -2   -0.70    4.30
   1  12   2    3.40    3.10
   1  12   2    8.70    4.00
  -1 -12   2   14.40    5.70
   1  12   2    6.70    3.20
   1 -12  -3   33.90    7.80
  -1  12   3   30.60    6.30
  -1  12   3   34.80    6.60
  -1  12   3   23.50    4.30
   1 -11  -3   11.50    6.30
   1 -11  -3   11.30    5.60
   1 -11   3   19.00    6.30
   1 -11   3    6.30    7.50
  -1  11   3   21.70    5.40
   1 -10  -3   33.40    9.50
   1 -10  -3   24.10    7.70
   1 -10  -3   21.20    7.20
   1 -10   3   21.50    7.40
  -1  10   3   19.30    5.80
  -1  10   3   26.90    6.20
  -1  10   3   25.80    6.30
   1 -10   3   37.90    8.70
   1 -10   3   24.40    8.20
   1  -9  -3 1406.36   59.39
   1  -9  -3 1434.06   60.29
   1  -9  -3 1392.96   55.19
   1  -9   3 1369.26   57.99
  -1   9   3 1457.25   57.49
  -1   9   3 1185.08   56.19
  -1   9   3 1388.26   57.19
  -1   9   3 1459.15   53.79
   1  -9   3 1381.46   58.09
   1  -9   3 1361.46   60.69
   1  -9   3 1293.27   59.39
   1  -8  -3   -0.80    3.80
   1  -8  -3    0.20    3.80
   1  -8   3    8.50    5.00
   1  -8   3    1.80    3.00
   1  -8   3    1.60    5.10
   1  -8   3    0.80    4.60
   1  -8   3    1.00    4.60
   1  -8   3    2.10    3.90
   1  -8   3   -0.30    5.00
  -1   8   3    0.40    2.90
  -1   8   3    1.40    4.40
  -1   8   3    1.10    2.70
   1  -7  -3 1326.57   53.49
   1  -7  -3 1309.87   54.69
   1  -7  -3 1315.87   54.59
   1  -7   3 1267.57   53.49
   1  -7   3 1258.87   53.79
  -1   7   3 1435.96   53.59
   1  -7   3 1277.77   55.19
  -1   7   3 1331.47   53.59
   1  -7   3 1294.07   53.29
   1  -7   3 1322.57   56.79
   1  -7   3 1363.46   56.09
  -1   7   3 1126.09   52.69
   1  -6  -3    2.40    3.70
   1  -6   3    1.10    3.20
  -1   6   3    3.90    2.60
  -1   6   3    3.70    3.00
   1  -5  -3   10.20    4.20
   1  -5   3    1.70    3.00
  -1   5   3    0.40    2.10
   1  -4  -3   27.30    5.40
   1  -4  -3   24.60    4.50
   1  -4  -3   27.60    4.10
  -1   4  -3   25.10    4.30
  -1   4   3   23.10    4.30
   1  -4   3   28.00    5.40
  -1   3  -3  946.11   37.10
   1  -3   3  995.40   37.60
  -1   2  -3   83.79    6.40
  -1   1  -3  150.48    7.20
  -1  -1   3  128.69   12.10
  -1  -2   3   73.69    7.40
  -1  -4   3   23.20    4.80
  -1  -5   3    5.40    3.60
  -1  -5   3   10.00    3.70
  -1  -6  -3    3.20    3.90
   1   6   3    2.40    2.60
  -1  -6   3    4.80    4.10
  -1  -6   3    4.50    2.50
  -1  -7  -3 1341.67   54.09
  -1  -7  -3 1295.07   55.59
  -1  -7  -3 1365.46   57.39
   1   7   3 1308.87   54.19
  -1  -7   3 1370.86   56.19
  -1  -7   3 1358.76   57.79
  -1  -7   3 1371.26   57.19
   1   7   3 1292.67   52.49
  -1  -7   3 1292.67   57.69
  -1  -7   3 1275.77   54.69
   1   7   3 1400.96   54.09
  -1  -7   3 1308.07   55.49
  -1  -7   3 1377.46   55.09
  -1  -8  -3    7.60    4.90
  -1  -8  -3   12.60    5.80
  -1  -8  -3    3.10    3.50
  -1  -8   3   11.70    6.00
   1   8   3    4.90    3.10
  -1  -8   3    4.90    4.50
  -1  -8   3    4.20    4.30
  -1  -8   3    4.60    4.80
   1   8   3    4.10    3.10
  -1  -8   3    6.90    5.40
  -1  -8   3    4.30    4.30
  -1  -8   3    1.40    4.00
  -1  -9  -3 1360.26   54.19
  -1  -9  -3 1401.16   60.39
  -1  -9  -3 1412.76   59.39
   1   9   3 1400.86   56.39
   1   9   3 1465.15   57.69
  -1  -9   3 1297.47   57.49
   1   9   3 1314.37   56.29
  -1  -9   3 1245.08   59.29
   1   9   3 1310.57   56.39
   1   9   3 1354.96   53.19
  -1  -9   3 1333.77   60.89
  -1  -9   3 1406.66   57.19
  -1  -9   3 1381.06   64.79
  -1  -9   3 1400.26   60.59
  -1 -10  -3   40.70    9.60
  -1 -10  -3   54.59   11.40
   1  10   3   29.50    7.00
  -1 -10   3   23.90    7.40
   1  10   3   38.40    7.20
  -1 -10   3   31.20    8.10
   1  10   3   35.30    8.40
  -1 -10   3   34.80   10.90
   1  10   3   38.20    7.30
  -1 -10   3   16.10    7.40
  -1 -11  -3    7.70    5.70
  -1 -11  -3   25.20    8.00
   1  11   3   21.40    5.10
   1  11   3   18.00    5.90
  -1 -11   3   13.60    5.50
  -1 -12  -3   28.60    7.40
   1  12   3   34.00    5.00
   1  12   3   23.60    5.80
   1  12   3   38.80    6.50
   1 -12  -4   49.20    7.80
  -1  12   4   46.80    5.60
  -1  12   4   33.70    6.40
   1 -11  -4  266.77   18.70
   1 -11  -4  261.57   17.50
  -1  11   4  246.08   15.90
  -1  11   4  262.77   15.60
  -1  11   4  245.78   14.30
   1 -11   4  256.17   16.50
   1 -10  -4   17.70    7.30
   1 -10  -4   12.90    6.30
   1 -10  -4   21.60    5.10
   1 -10   4   13.10    6.60
  -1  10   4   14.30    4.70
  -1  10   4   16.20    5.00
   1 -10   4   13.60    6.10
   1  -9  -4   28.00    6.50
  -1   9   4   19.90    6.90
  -1   9   4   18.50    5.70
   1  -9   4   29.50    8.80
   1  -9   4    9.80    5.50
   1  -9   4   17.10    6.50
   1  -9   4   21.10    8.20
   1  -9   4   29.50    8.60
   1  -9   4   22.80   11.20
  -1   9   4   16.50    5.10
  -1   9   4   23.90    8.20
   1  -8  -4   56.29    9.30
   1  -8  -4   52.29   10.60
   1  -8  -4   77.79   12.30
   1  -8   4   51.39    8.50
   1  -8   4   53.69   10.70
   1  -8   4   57.99   10.60
  -1   8   4   62.49    9.40
   1  -8   4   55.29   10.70
   1  -8   4   47.20    8.60
  -1   8   4   62.99    9.50
   1  -8   4   64.49   11.30
  -1   8   4   74.79   10.30
   1  -7  -4  618.94   32.50
   1  -7  -4  636.24   31.50
   1  -7  -4  641.74   31.90
  -1   7   4  616.34   30.20
   1  -7   4  658.83   34.00
   1  -7   4  662.23   33.50
  -1   7   4  657.33   31.30
   1  -7   4  617.24   30.30
   1  -7   4  646.54   29.40
   1  -7   4  665.23   32.00
   1  -7   4  680.13   31.80
   1  -7   4  595.64   31.70
   1  -6  -4    1.00    4.50
   1  -6  -4    5.60    3.90
   1  -6   4    9.20    4.40
   1  -6   4    4.10    4.40
   1  -6   4   23.80    6.20
  -1   6   4    6.40    3.50
   1  -6   4    6.90    3.60
   1  -6   4   11.50    4.80
  -1   6   4    6.30    4.40
   1  -6   4   16.90    5.10
  -1   5  -4  836.92   35.00
   1  -5  -4  807.92   35.20
   1  -5   4  869.71   37.30
  -1   5   4  941.61   36.80
  -1   4  -4    8.00    3.50
   1  -4   4    1.80    2.80
  -1   3  -4  310.77   15.70
  -1   2  -4   66.69    4.90
  -1  -1   4 5240.78  188.98
   1   2  -4   61.69    5.20
   1   3  -4  342.77   15.30
  -1  -3   4  333.57   15.70
  -1  -4   4    5.60    3.40
  -1  -5   4  803.62   36.20
  -1  -5   4  942.51   37.40
  -1  -6  -4    3.80    4.50
  -1  -6  -4    8.40    4.10
   1   6  -4    5.20    3.00
  -1  -6   4    3.30    3.60
  -1  -6   4    9.60    4.80
  -1  -6   4    9.60    4.10
  -1  -6   4    8.00    4.40
  -1  -6   4    7.90    4.20
  -1  -7  -4  669.63   34.20
  -1  -7  -4  644.24   31.40
  -1  -7   4  613.64   31.30
  -1  -7   4  691.53   32.90
  -1  -7   4  546.95   34.30
  -1  -7   4  702.23   32.20
  -1  -7   4  646.94   38.10
  -1  -7   4  622.74   35.30
  -1  -7   4  648.64   30.70
  -1  -7   4  643.84   35.50
  -1  -7   4  655.13   33.80
  -1  -7   4  645.94   31.60
  -1  -7   4  675.63   33.80
   1   7   4  647.74   30.70
   1   7   4  685.13   31.50
  -1  -8  -4   52.79    8.80
  -1  -8   4   69.79   12.10
  -1  -8   4   80.19   14.00
   1   8   4   52.79    9.00
  -1  -8   4   62.59   11.20
  -1  -8   4   59.39    9.90
  -1  -8   4   81.49   11.70
  -1  -8   4   75.99   11.50
   1   8   4   47.70    7.90
   1   8   4   39.50    8.80
  -1  -8   4   74.49   11.80
  -1  -9  -4   19.80    5.30
  -1  -9  -4   17.50    7.50
  -1  -9   4   26.50    6.90
   1   9   4   26.10    8.30
   1   9   4   14.30    5.60
  -1  -9   4   32.30   11.70
  -1  -9   4   24.10    7.60
  -1  -9   4   21.10    7.10
   1   9   4   24.20    5.60
   1   9   4   20.70    6.10
  -1  -9   4   22.80    6.70
  -1  -9   4   32.60    8.70
  -1  -9   4   25.40    8.60
  -1 -10  -4    6.40    6.30
  -1 -10  -4   17.30    4.80
  -1 -10  -4   17.90    6.50
   1  10   4   16.40    6.10
   1  10   4    9.00    3.90
  -1 -10   4   15.50    6.20
  -1 -10   4   16.30    6.60
  -1 -10   4   21.90    6.50
  -1 -10   4   15.10    7.70
  -1 -11  -4  262.47   18.80
  -1 -11  -4  263.57   22.30
   1  11   4  274.27   16.70
   1  11   4  257.17   14.60
  -1 -12  -4   40.10    8.00
   1  12   4   31.80    4.50
   1  12   4   42.80    6.80
   1 -11  -5  110.59   15.70
   1 -11  -5  140.69   12.60
   1 -11   5  136.89   11.10
  -1  11   5  140.79    9.90
  -1  11   5  130.89   10.00
   1 -10  -5   47.10   10.00
   1 -10  -5   37.40    6.60
  -1  10   5   56.89    8.60
   1 -10   5   41.90    9.10
   1 -10   5   43.50    8.50
  -1  10   5   55.79    8.60
  -1  10   5   62.09   10.00
   1 -10   5   42.40    9.40
   1  -9  -5  270.67   17.60
  -1   9   5  276.07   17.40
   1  -9   5  281.97   18.30
  -1   9   5  253.27   17.60
   1  -9   5  219.58   20.10
   1  -9   5  275.67   24.10
   1  -9   5  245.48   18.10
   1  -9   5  278.57   20.60
   1  -9   5  289.07   19.80
   1  -8  -5    7.20    5.30
   1  -8  -5    4.30    4.00
   1  -8   5   -1.00    4.10
   1  -8   5    8.20    5.20
   1  -8   5    6.20    5.10
  -1   8   5   13.90    5.00
   1  -8   5    6.50    4.20
  -1   8   5    3.00    3.00
   1  -8   5    6.30    5.40
  -1   8   5   11.70    5.50
  -1   8   5    4.30    3.60
   1  -8   5   11.50    5.00
   1  -8   5    8.70    5.10
   1  -7  -5  257.77   18.20
   1  -7  -5  272.77   19.40
  -1   7   5  266.47   16.80
   1  -7   5  234.48   18.50
   1  -7   5  248.28   17.30
   1  -7   5  237.68   18.30
  -1   7   5  276.77   17.70
   1  -7   5  243.18   16.80
   1  -7   5  244.18   15.40
   1  -7   5  227.68   17.30
   1  -7   5  259.47   16.70
   1  -7   5  262.27   18.10
  -1   6  -5   46.60    7.60
   1  -6  -5   69.29   10.10
   1  -6  -5   68.29   11.00
   1  -6   5   60.99    9.20
   1  -6   5   58.49   10.20
  -1   6   5   63.49    9.90
   1  -6   5   63.09    9.40
   1  -6   5   75.69   11.20
   1  -6   5   54.49    9.40
   1  -6   5   55.79    8.90
   1  -6   5   62.39   10.40
  -1   6   5   69.49    9.20
   1  -6   5   50.99   10.00
  -1   5  -5  250.07   15.00
   1  -5  -5  244.98   15.20
   1  -5   5  208.28   15.50
   1  -5   5  248.08   15.60
   1  -5   5  245.88   15.90
   1  -5   5  263.07   16.20
   1  -5   5  278.17   17.40
  -1   4  -5  614.64   28.80
   1  -4   5  661.13   28.90
  -1   4   5  625.34   28.40
  -1   3  -5 1584.74   59.99
   1  -3   5 1483.85   57.89
  -1   2  -5   28.00    4.10
  -1  -2   5   27.80    4.40
   1   3  -5 1558.14   58.19
  -1  -3   5 1580.94   58.29
   1   4  -5  652.13   26.60
  -1  -4   5  711.43   28.50
  -1  -4   5  538.85   27.30
   1   5  -5  237.68   13.30
   1   5  -5  257.57   16.50
  -1  -5   5  272.27   17.50
  -1  -5   5  268.97   15.30
  -1  -5   5  284.37   16.60
  -1  -5   5  258.17   17.10
  -1  -5   5  286.77   20.30
  -1  -5   5  267.17   16.80
   1   6  -5   68.19   10.20
  -1  -6   5   70.79   14.50
   1   6   5   52.39    8.20
  -1  -6   5   48.90   10.00
  -1  -6   5   71.29   10.10
  -1  -6   5   50.59    8.20
  -1  -6   5   70.19   10.20
   1   6   5   47.90    8.50
  -1  -6   5   61.59   10.20
  -1  -6   5   63.89   10.40
  -1  -6   5   68.79   10.90
  -1  -6   5   49.30   12.20
  -1  -6   5   88.39   11.70
  -1  -7  -5  237.68   17.40
  -1  -7   5  249.18   20.10
  -1  -7   5  278.97   17.80
  -1  -7   5  267.27   15.70
  -1  -7   5  250.97   16.30
  -1  -7   5  241.68   20.90
   1   7   5  239.08   16.40
  -1  -7   5  269.37   19.20
   1   7   5  265.07   17.80
  -1  -7   5  251.97   17.50
  -1  -7   5  247.28   19.80
   1   7   5  255.87   16.10
  -1  -7   5  231.48   19.70
  -1  -7   5  249.08   18.80
  -1  -7   5  251.37   17.60
  -1  -7   5  269.17   18.50
  -1  -8  -5    6.90    4.50
  -1  -8  -5    3.30    6.00
  -1  -8   5   11.50    4.90
  -1  -8   5   19.50    6.70
  -1  -8   5   19.20    6.20
  -1  -8   5   19.70    8.70
  -1  -8   5   13.60    6.00
  -1  -8   5    8.40    5.50
  -1  -8   5    8.20    4.90
   1   8   5   12.00    4.60
   1   8   5    2.20    3.00
  -1  -8   5   13.50    7.10
  -1  -8   5    0.40    4.00
  -1  -9  -5  247.58   19.00
  -1  -9  -5  280.67   17.70
   1   9   5  243.88   17.50
  -1  -9   5  250.37   19.40
   1   9   5  267.07   17.20
  -1  -9   5  259.27   19.10
  -1  -9   5  301.17   19.40
  -1  -9   5  266.67   17.10
  -1  -9   5  262.77   18.50
  -1  -9   5  267.97   22.20
  -1 -10  -5   33.40    9.80
  -1 -10  -5   39.90    8.80
  -1 -10  -5   34.40    6.30
   1  10   5   48.30    7.80
  -1 -10   5   43.50    9.30
   1  10   5   33.30    6.60
  -1 -10   5   33.60    9.50
  -1 -10   5   49.00    8.50
  -1 -10   5   40.40    9.10
  -1 -11  -5   78.19   13.70
  -1 -11  -5  144.39   13.80
   1  11   5  125.29    9.60
   1  11   5  124.39    9.60
   1 -11  -6  196.18   14.20
   1 -11  -6  180.88   13.40
  -1  11   6  185.48   11.50
  -1  11   6  188.28   11.80
   1 -10  -6    9.90    5.50
   1 -10  -6    2.50    3.60
  -1  10   6    5.60    3.30
   1 -10   6    0.30    4.00
   1 -10   6    5.80    4.50
  -1  10   6    4.90    3.70
   1 -10   6    4.20    4.70
   1  -9  -6   16.80    5.40
  -1   9   6   14.70    5.10
   1  -9   6   23.60    7.50
   1  -9   6   26.30    7.20
   1  -9   6   21.40    9.60
   1  -9   6   18.60    6.20
   1  -9   6   34.90    8.10
   1  -8  -6   -1.40    3.30
   1  -8  -6    3.50    4.30
   1  -8   6   -3.60    3.30
   1  -8   6    2.90    3.40
   1  -8   6   -0.20    3.40
   1  -8   6    3.40    4.60
  -1   8   6    0.80    3.20
  -1   8   6    1.40    3.20
   1  -8   6    5.90    4.90
   1  -8   6    8.90    6.10
   1  -8   6    2.20    3.80
   1  -7  -6  625.34   33.90
   1  -7  -6  590.24   32.20
   1  -7   6  597.64   37.80
  -1   7   6  675.83   30.70
   1  -7   6  579.24   31.80
   1  -7   6  624.64   28.90
   1  -7   6  598.24   32.70
   1  -7   6  612.74   30.90
   1  -7   6  614.34   31.70
   1  -7   6  596.24   30.70
  -1   7   6  575.94   31.60
   1  -7   6  613.64   29.70
   1  -6  -6    8.60    3.90
   1  -6  -6    9.00    5.60
   1  -6  -6    0.80    3.60
   1  -6  -6    2.40    4.70
  -1   6  -6   10.40    4.60
   1  -6   6    4.90    5.00
  -1   6   6    4.30    4.00
   1  -6   6    9.00    4.90
   1  -6   6   10.30    6.00
   1  -6   6    3.70    4.10
   1  -6   6    6.20    4.20
   1  -6   6    9.20    4.60
   1  -6   6    9.10    5.00
  -1   6   6    7.90    4.40
   1  -6   6   11.00    4.80
   1  -6   6   -0.90    3.70
  -1   5  -6  500.15   25.30
   1  -5  -6  464.65   23.30
   1  -5  -6  448.66   29.70
   1  -5   6  504.05   25.40
  -1   5   6  519.95   25.00
   1  -5   6  507.45   25.80
   1  -5   6  476.95   28.90
   1  -5   6  500.55   24.60
   1  -5   6  527.65   27.50
   1  -5   6  500.65   26.50
  -1   5   6  500.95   25.60
   1  -5   6  456.75   23.80
   1  -5   6  498.95   26.60
   1  -5   6  493.15   25.50
  -1   4  -6   61.39    9.80
   1  -4   6   63.49    9.70
   1  -4   6   52.99    8.30
   1  -4   6   62.79    9.00
   1  -4   6   72.59   10.30
   1  -4   6   62.69    9.60
   1  -4   6   45.80    9.70
   1  -4   6   57.09    8.00
   1  -4   6   57.99    8.50
  -1   3  -6  881.71   33.40
  -1   3  -6  836.72   37.70
  -1   3  -6  836.62   33.50
   1  -3   6  809.12   38.00
   1  -3   6  865.91   35.70
  -1   2  -6   31.70    4.90
   1   2  -6   36.50    5.80
   1   2  -6   30.60    4.70
   1   3  -6  922.11   39.70
   1   3  -6  842.92   35.40
  -1  -3   6  821.42   36.30
  -1  -3   6  904.61   35.30
   1   4  -6   80.39   11.60
   1   4  -6   77.29    7.00
  -1  -4   6   82.39   10.10
  -1  -4   6   83.79   11.00
  -1  -4   6   83.49   10.30
  -1  -4   6   73.59    7.70
  -1  -4   6   75.49   11.00
  -1  -4   6   81.99   11.00
   1   5  -6  522.45   27.10
  -1  -5   6  541.85   25.50
  -1  -5   6  485.25   38.00
  -1  -5   6  515.35   23.50
  -1  -5   6  515.75   27.40
  -1  -5   6  539.65   26.80
  -1  -5   6  488.15   25.10
  -1  -5   6  494.65   25.60
  -1  -5   6  505.05   27.10
  -1  -5   6  497.25   27.30
   1   6  -6    5.60    4.10
  -1  -6   6    5.30    3.90
  -1  -6   6   12.70    5.00
  -1  -6   6    6.00    4.70
  -1  -6   6   12.00    5.50
  -1  -6   6    6.30    4.60
  -1  -6   6   13.60    5.90
  -1  -6   6    4.20    3.80
  -1  -6   6   12.60    5.00
  -1  -6   6   23.50    7.20
  -1  -6   6   11.80    5.50
   1   6   6    3.20    2.90
  -1  -7  -6  585.84   31.30
  -1  -7   6  579.04   34.70
  -1  -7   6  623.24   35.00
  -1  -7   6  556.64   31.50
  -1  -7   6  564.74   30.10
  -1  -7   6  566.14   31.20
  -1  -7   6  576.14   34.30
   1   7   6  572.74   30.90
   1   7   6  589.64   29.30
  -1  -7   6  607.54   28.20
  -1  -7   6  637.14   32.80
  -1  -7   6  604.04   30.50
  -1  -7   6  614.34   30.70
  -1  -8  -6   -1.70    2.90
  -1  -8  -6    2.80    5.40
  -1  -8   6   -1.20    2.80
  -1  -8   6   -0.20    4.50
  -1  -8   6    3.20    4.80
  -1  -8   6    2.60    4.20
   1   8   6    1.40    2.50
  -1  -8   6    3.90    3.40
  -1  -8   6   -1.20    3.20
  -1  -8   6    7.20    4.20
   1   8   6    4.20    3.60
  -1  -8   6   12.10    7.50
  -1  -8   6    5.00    3.50
  -1  -9  -6   10.30    5.90
  -1  -9  -6   27.10    6.70
  -1  -9   6   34.00    6.30
  -1  -9   6   28.40    9.60
   1   9   6   19.00    5.30
  -1  -9   6   12.20    6.20
  -1  -9   6   24.60    7.70
  -1  -9   6   34.00    7.00
  -1  -9   6   21.20    6.80
  -1  -9   6   19.30    6.50
  -1 -10  -6   -1.70    3.30
  -1 -10  -6    1.20    4.80
  -1 -10   6   10.80    6.50
  -1 -10   6    9.10    4.00
   1  10   6    6.80    3.50
   1  10   6    7.00    3.70
  -1 -10   6    6.20    5.00
  -1 -10   6   -0.30    3.50
  -1 -11  -6  166.18   14.30
  -1 -11  -6  191.48   14.10
   1  11   6  189.98   11.50
   1  11   6  185.18   11.90
   1 -11  -7    0.40    3.50
  -1  11   7   -1.20    2.80
  -1  11   7    6.60    2.70
   1 -10   7    4.00    4.20
  -1  10   7    1.30    4.20
   1  -9  -7  528.55   28.40
   1  -9  -7  505.45   27.40
   1  -9   7  535.85   28.60
   1  -9   7  527.75   25.70
   1  -9   7  531.55   29.30
   1  -9   7  527.95   27.40
  -1   9   7  566.34   26.30
   1  -8  -7    2.30    4.90
   1  -8   7    1.00    3.70
   1  -8   7    7.00    6.00
   1  -8   7    8.00    4.50
   1  -8   7   19.70    5.80
  -1   8   7    8.90    4.60
   1  -8   7   10.00    5.40
   1  -8   7    3.70    4.10
   1  -7  -7  524.65   30.80
   1  -7  -7  570.04   32.90
   1  -7   7  555.04   27.20
   1  -7   7  592.54   31.80
  -1   7   7  495.45   30.20
   1  -7   7  580.64   27.90
   1  -7   7  571.34   29.80
   1  -7   7  511.95   31.00
   1  -7   7  573.34   29.10
   1  -7   7  571.44   29.60
  -1   7   7  577.14   28.30
   1  -7   7  589.04   30.90
  -1   6  -7  146.09   13.70
   1  -6  -7  154.58   15.10
   1  -6  -7  141.09   10.60
   1  -6   7  129.69   12.10
  -1   6   7  150.88   13.60
   1  -6   7  144.29   16.10
   1  -6   7  132.99   13.90
   1  -6   7  144.79   13.60
  -1   6   7  166.48   12.60
   1  -6   7  152.68   14.20
   1  -6   7  145.29   13.20
   1  -6   7  155.98   14.10
   1  -6   7  154.58   13.80
  -1   5  -7  814.72   38.00
   1  -5  -7  754.02   38.20
   1  -5   7  840.12   41.70
   1  -5   7  798.62   38.20
   1  -5   7  798.22   36.80
  -1   5   7  768.32   37.20
   1  -5   7  849.61   37.40
   1  -5   7  833.22   36.00
   1  -5   7  778.02   38.60
   1  -5   7  697.63   34.20
  -1   5   7  810.12   35.50
   1  -5   7  776.52   38.00
   1  -5   7  796.62   37.20
  -1   4  -7  244.88   17.30
   1  -4  -7  210.78   17.70
   1  -4   7  235.48   17.20
   1  -4   7  246.78   15.70
   1  -4   7  241.58   19.10
   1  -4   7  234.98   15.70
   1  -4   7  283.47   18.00
   1  -4   7  247.78   15.00
   1  -4   7  240.28   15.90
   1  -4   7  230.98   16.70
   1  -4   7  218.68   15.40
  -1   3  -7  937.51   38.00
  -1   3  -7  963.10   43.40
  -1   3  -7  896.41   38.50
   1  -3   7  969.70   46.50
   1  -3   7  942.91   40.20
   1  -3   7  930.71   40.90
   1  -3   7  977.80   43.20
   1  -3   7  918.21   44.50
   1  -3   7 1020.60   42.90
   1  -3   7  982.10   44.00
   1  -2   7  490.15   29.80
   1  -2   7  490.25   25.70
   1  -2   7  480.55   28.70
   1   2  -7  484.35   23.40
  -1  -2   7  478.05   25.60
  -1  -2   7  484.65   25.60
  -1  -2   7  470.85   24.10
  -1  -2   7  439.26   28.20
  -1  -2   7  493.75   25.50
   1   3  -7  958.60   38.30
   1   3  -7 1007.00   44.00
   1   3  -7  963.50   39.80
  -1  -3   7  973.90   45.30
  -1  -3   7  843.92   38.20
  -1  -3   7  924.41   43.00
  -1  -3   7 1098.19   53.09
  -1  -3   7  987.40   43.70
  -1  -3   7  953.80   50.89
  -1  -3   7  903.81   44.70
  -1  -3   7  948.31   41.60
   1   4  -7  239.98   17.70
  -1  -4   7  222.28   14.20
  -1  -4   7  250.87   19.80
  -1  -4   7  232.08   16.00
  -1  -4   7  234.38   16.70
  -1  -4   7  219.68   16.70
  -1  -4   7  236.88   16.50
  -1  -4   7  279.47   35.90
  -1  -4   7  233.78   15.60
  -1  -4   7  230.98   13.70
   1   5  -7  819.42   39.80
  -1  -5   7  836.62   39.60
  -1  -5   7  832.52   39.50
  -1  -5   7  848.92   43.30
  -1  -5   7  858.71   37.50
  -1  -5   7  786.02   38.70
  -1  -5   7  725.23   39.50
  -1  -5   7  826.72   36.70
  -1  -5   7  842.32   38.10
  -1  -5   7  798.92   36.90
   1   6  -7  172.08   14.90
  -1  -6   7  172.88   14.40
  -1  -6   7  167.38   14.60
  -1  -6   7  178.58   14.50
  -1  -6   7  160.28   16.40
  -1  -6   7  146.79   13.80
  -1  -6   7  139.79   13.50
  -1  -6   7  177.18   13.40
  -1  -6   7  166.08   15.10
  -1  -6   7  152.18   15.70
  -1  -7  -7  576.34   31.20
  -1  -7   7  579.64   27.80
  -1  -7   7  554.54   29.60
   1   7   7  563.34   28.20
  -1  -7   7  537.45   30.90
  -1  -7   7  600.84   30.30
  -1  -7   7  588.64   31.20
  -1  -7   7  580.64   30.20
   1   7   7  581.04   31.50
  -1  -7   7  569.44   27.40
  -1  -7   7  562.44   32.90
  -1  -8  -7   12.50    5.60
  -1  -8  -7   11.70    5.90
  -1  -8   7    3.50    4.20
  -1  -8   7    7.60    5.20
  -1  -8   7    8.60    4.30
   1   8   7    6.80    4.20
  -1  -8   7    8.40    4.40
  -1  -8   7    7.10    4.30
  -1  -8   7    5.90    4.20
  -1  -8   7    8.80    4.30
  -1  -8   7    7.80    7.00
  -1  -8   7    0.00    3.80
  -1  -9  -7  529.75   28.60
  -1  -9  -7  534.35   27.50
   1   9   7  510.95   25.60
  -1  -9   7  543.15   27.70
  -1  -9   7  534.75   23.90
  -1  -9   7  579.64   28.10
  -1  -9   7  542.95   29.80
  -1  -9   7  517.05   29.30
  -1  -9   7  524.75   28.30
  -1 -10  -7    7.90    5.30
  -1 -11  -7    8.70    4.40
   1  11   7    3.30    2.40
   1  11   7    2.20    3.20
   1 -10  -8   48.70    6.80
   1 -10   8   53.59    7.90
  -1  10   8   51.69    6.00
   1 -10   8   36.80    7.10
   1  -9  -8    0.50    3.50
   1  -9  -8    6.40    4.60
  -1   9   8    8.40    3.20
   1  -9   8    2.50    3.60
   1  -9   8    9.10    4.80
   1  -9   8    1.10    4.30
   1  -8  -8    3.20    3.90
   1  -8   8   -0.90    3.90
   1  -8   8    6.30    4.90
   1  -8   8    2.90    4.00
   1  -8   8    6.30    3.80
   1  -8   8    4.70    6.50
  -1   8   8    3.40    3.30
   1  -8   8    2.00    3.20
   1  -8   8    0.70    3.30
   1  -7  -8  179.48   17.70
   1  -7  -8  204.98   17.30
   1  -7   8  202.58   16.80
   1  -7   8  199.28   14.90
   1  -7   8  233.68   14.70
   1  -7   8  186.98   15.10
   1  -7   8  192.98   16.00
   1  -7   8  214.68   16.50
  -1   7   8  208.18   14.10
   1  -7   8  198.38   13.90
   1  -6  -8   37.20    6.60
   1  -6  -8   35.70    8.90
   1  -6   8   20.30    6.50
   1  -6   8   17.60    6.20
   1  -6   8   22.20    6.70
   1  -6   8   28.90    8.20
   1  -6   8   43.50    9.20
   1  -6   8   33.20    7.10
   1  -6   8   34.00    8.00
  -1   6   8   16.60    5.40
   1  -6   8   18.10    7.30
   1  -5  -8 1092.29   51.89
  -1   5  -8 1151.68   57.89
  -1   5   8 1106.29   46.20
   1  -5   8 1082.89   49.20
   1  -5   8 1180.48   49.10
   1  -5   8 1141.59   47.60
   1  -5   8 1140.89   50.39
   1  -5   8 1133.59   50.79
   1  -5   8 1102.39   50.69
   1  -5   8 1068.59   48.50
  -1   4  -8  165.88   11.50
  -1   4  -8  187.38   16.10
   1  -4   8  176.08   14.90
   1  -4   8  172.58   16.30
   1  -4   8  173.48   12.80
   1  -4   8  169.08   15.30
   1  -4   8  181.78   14.10
   1  -4   8  174.08   14.10
   1  -4   8  171.08   13.90
  -1   4   8  171.68   11.90
  -1   3  -8  215.28   13.80
  -1   3  -8  227.98   13.70
  -1   3  -8  215.98   12.70
   1  -3   8  220.88   14.70
   1  -3   8  224.98   15.10
   1  -3   8  227.08   15.30
   1  -3   8  210.78   15.90
  -1   3   8  218.18   12.80
   1  -3   8  237.18   17.30
   1  -3   8  225.18   16.70
  -1   2  -8   19.30    4.90
   1  -2   8   12.30    5.00
  -1   2   8   18.10    5.30
   1  -2   8   14.50    5.60
   1  -2   8   16.40    4.80
   1  -1   8  959.00   44.40
   1  -1   8  958.10   43.40
   1  -1   8  967.10   43.30
  -1   0   8  255.07   17.00
  -1   0   8  255.97   18.10
   1   0   8  270.27   17.90
   1   1  -8  829.72   42.70
   1   1  -8  926.61   40.00
  -1  -1   8  958.60   42.50
  -1  -1   8  958.80   47.30
  -1  -1   8  979.70   43.40
  -1  -1   8  973.00   43.50
   1   2  -8   14.10    4.50
  -1  -2   8   18.90    6.80
  -1  -2   8   18.70    4.50
  -1  -2   8   26.80    6.70
  -1  -2   8   22.70    7.10
  -1  -2   8   22.70    7.10
  -1  -2   8   18.80    6.00
   1   3  -8  231.38   15.00
   1   3  -8  232.88   18.90
   1   3  -8  229.88   14.00
  -1  -3   8  255.47   17.60
  -1  -3   8  204.88   16.50
  -1  -3   8  222.28   13.90
  -1  -3   8  258.57   20.50
  -1  -3   8  235.18   16.80
  -1  -3   8  229.98   15.90
  -1  -3   8  220.58   15.90
   1   4  -8  157.38   15.50
   1   4  -8  163.08   12.30
  -1  -4   8  185.98   15.70
  -1  -4   8  162.38   16.60
  -1  -4   8  190.08   16.00
  -1  -4   8  164.28   13.90
  -1  -4   8  173.38   14.70
   1   5  -8 1044.40   50.79
  -1  -5   8 1031.70   48.90
  -1  -5   8 1151.98   47.30
  -1  -5   8 1025.60   49.10
  -1  -5   8 1140.49   54.09
  -1  -5   8 1182.88   47.00
  -1  -5   8 1115.59   50.09
  -1  -5   8 1075.49   47.50
   1   6  -8   23.50    8.30
  -1  -6  -8   20.30    6.50
  -1  -6   8   36.20    8.30
  -1  -6   8   18.50    6.10
  -1  -6   8   30.70    8.40
  -1  -6   8   27.30    7.70
  -1  -6   8   28.50    7.40
  -1  -6   8   26.80    7.80
  -1  -6   8   31.50    8.30
  -1  -7  -8  251.37   18.40
  -1  -7   8  220.58   17.20
  -1  -7   8  221.78   19.20
  -1  -7   8  201.78   17.70
  -1  -7   8  165.68   14.90
  -1  -7   8  224.38   16.50
  -1  -7   8  203.58   16.40
  -1  -7   8  221.98   16.10
  -1  -7   8  199.58   14.20
  -1  -8  -8   -1.80    3.90
  -1  -8   8    4.00    4.10
  -1  -8   8    5.40    4.20
  -1  -8   8    2.00    4.10
   1   8   8   -3.90    2.60
  -1  -8   8    4.20    3.70
  -1  -8   8    5.70    5.60
  -1  -8   8    9.40    3.90
  -1  -8   8    2.00    4.00
  -1  -9  -8    4.10    3.90
  -1  -9   8    6.60    4.80
  -1  -9   8    8.30    4.70
  -1  -9   8   10.80    4.70
  -1  -9   8   10.10    3.80
  -1  -9   8    7.40    4.60
   1   9   8   13.90    4.10
  -1 -10  -8   45.90    8.40
  -1 -10  -8   49.40    6.60
  -1 -10  -8   41.80    6.70
  -1 -10   8   43.30    6.90
   1  10   8   44.40    5.80
   1  -9  -9  365.76   19.90
   1  -9   9  367.46   20.50
   1  -9   9  364.06   19.80
  -1   9   9  390.26   17.00
   1  -9   9  371.46   19.50
   1  -8  -9   22.20    6.60
  -1   8   9   25.90    5.00
   1  -8   9   16.50    5.40
   1  -8   9   21.60    4.90
   1  -8   9   21.20    6.50
   1  -8   9   11.50    5.20
   1  -8   9   17.30    7.50
   1  -7  -9   24.00    7.30
   1  -7   9   25.30    6.40
   1  -7   9   30.00    6.80
   1  -7   9   23.50    6.70
  -1   7   9   20.30    5.30
   1  -7   9   16.30    6.50
   1  -7   9   20.10    6.70
   1  -6  -9   -1.10    4.50
   1  -6   9   10.10    5.10
   1  -6   9    1.70    4.50
  -1   6   9   -1.30    2.60
   1  -6   9    0.40    4.00
   1  -6   9    1.50    4.50
   1  -6   9    4.30    4.50
   1  -6   9    1.50    3.80
   1  -5  -9  149.99   12.40
  -1   5  -9  158.98   16.70
   1  -5   9  176.38   13.90
   1  -5   9  166.38   15.10
   1  -5   9  183.08   15.10
   1  -5   9  170.88   14.60
  -1   5   9  169.48   11.50
   1  -5   9  169.68   13.60
   1  -5   9  192.48   15.30
  -1   4  -9  130.39   10.10
  -1   4  -9  139.09   15.00
   1  -4   9  126.29   11.70
  -1   4   9   93.49    8.50
   1  -4   9  147.09   12.70
   1  -4   9  120.19   12.40
   1  -4   9  109.99   14.30
   1  -4   9   94.49   13.10
   1  -4   9  127.29   15.50
  -1   3  -9 1696.73   64.39
  -1   3  -9 1626.44   61.89
   1  -3   9 1576.64   65.29
   1  -3   9 1595.54   64.89
   1  -3   9 1643.74   67.19
   1  -3   9 1656.23   68.49
   1  -3   9 1670.83   68.79
  -1   2  -9   52.49    9.20
   1  -2   9   43.40    9.30
   1  -2   9   53.49    9.30
   1  -2   9   63.59   10.30
   1  -2   9   45.60    9.40
  -1   1   9  107.59   14.90
  -1   1   9   68.09   10.00
   1  -1   9  105.19   13.60
   1  -1   9   84.99   11.70
  -1   0   9    2.10    3.90
  -1   0   9    2.60    3.10
  -1   0   9    3.60    4.10
   1   0   9   -0.40    2.60
   1   1  -9   77.49   10.80
  -1  -1   9   85.99   12.70
  -1  -1   9   90.19   12.30
  -1  -1   9   84.79   12.20
   1   1   9  109.49   13.90
   1   2  -9   61.19    9.30
   1   2  -9   44.60    8.30
   1   2  -9   43.50    8.60
  -1  -2   9   64.29   10.50
  -1  -2   9   64.39   11.20
  -1  -2   9   52.49    9.90
  -1  -2   9   62.49    9.00
  -1  -2   9   56.79   10.10
  -1  -2   9   52.59    9.70
   1   3  -9 1686.73   64.19
   1   3  -9 1646.34   71.59
   1   3  -9 1646.84   76.39
   1   3  -9 1623.94   61.79
  -1  -3   9 1615.34   62.59
  -1  -3   9 1560.94   65.59
  -1  -3   9 1651.13   68.79
  -1  -3   9 1651.13   68.39
  -1  -3   9 1617.04   67.79
   1   4  -9  140.19   15.30
   1   4  -9  125.99   10.50
  -1  -4   9  125.99   13.00
  -1  -4   9  124.09   13.10
  -1  -4   9  128.59   14.30
  -1  -4   9  128.39   12.20
  -1  -4   9  107.39   13.80
  -1  -4   9  128.59   13.00
  -1  -4   9  133.89   15.40
   1   5  -9  217.08   18.70
  -1  -5   9  151.88   14.70
  -1  -5   9  175.68   13.80
  -1  -5   9  163.78   15.00
  -1  -5   9  156.58   13.50
  -1  -5   9  182.68   14.70
  -1  -5   9  169.78   15.00
  -1  -6  -9    5.00    4.70
  -1  -6   9    1.70    4.40
  -1  -6   9    8.30    5.10
  -1  -6   9    3.60    3.70
  -1  -6   9    1.60    3.50
  -1  -6   9    1.00    3.50
  -1  -6   9    2.10    3.70
  -1  -7  -9   30.90    7.80
   1   7   9   19.50    5.00
  -1  -7   9   24.90    6.80
  -1  -7   9   21.50    5.90
  -1  -7   9   25.30    7.90
  -1  -7   9   30.30    6.90
  -1  -7   9   26.10    6.70
  -1  -7   9   19.50    6.50
  -1  -7   9   14.00    6.00
  -1  -8  -9   21.50    6.50
  -1  -8   9   13.80    5.40
   1   8   9   23.30    5.00
  -1  -8   9   15.20    5.60
  -1  -8   9   19.90    6.20
  -1  -8   9   22.50    6.50
  -1  -8   9    9.00    5.00
  -1  -9  -9  376.46   19.90
   1   9   9  387.16   17.20
  -1  -9   9  404.86   19.60
  -1  -9   9  350.16   20.00
  -1  -9   9  366.16   20.00
   1  -8 -10   33.40    6.90
   1  -8  10   29.20    6.30
   1  -8  10   18.10    5.50
   1  -8  10   19.70    4.70
   1  -7 -10    2.10    3.90
   1  -7  10    7.80    5.70
   1  -7  10   -1.60    2.40
   1  -7  10    7.40    5.10
   1  -7  10    0.60    3.50
   1  -7  10    5.60    3.20
   1  -7  10   10.40    5.60
   1  -6 -10   -1.00    3.90
   1  -6  10    3.80    4.20
   1  -6  10    2.90    3.50
   1  -6  10    2.50    3.60
   1  -6  10    8.00    4.60
   1  -6  10    8.30    5.10
   1  -5 -10  745.73   39.00
   1  -5 -10  756.42   33.50
   1  -5  10  779.12   35.10
   1  -5  10  789.92   36.70
   1  -5  10  808.02   37.60
   1  -5  10  765.32   34.50
   1  -5  10  701.63   34.60
   1  -5  10  767.22   37.90
   1  -4 -10   19.90    7.70
  -1   4 -10   14.70    4.70
  -1   4 -10   15.10    6.20
  -1   4 -10   16.60   10.30
  -1   4 -10   14.10    5.20
   1  -4  10    7.80    4.40
   1  -4  10   13.60    5.50
   1  -4  10   11.40    5.70
   1  -4  10   13.60    5.90
   1  -4  10    3.00    4.10
   1  -4  10   17.50    5.80
  -1   3 -10  276.27   22.60
  -1   3 -10  256.67   17.30
  -1   3 -10  281.47   16.90
  -1   3 -10  259.37   17.90
  -1   3 -10  257.37   15.40
   1  -3  10  250.37   16.40
   1  -3  10  250.17   18.90
   1  -3  10  256.27   18.50
   1  -3  10  274.77   17.20
   1  -3  10  291.87   19.60
  -1   2 -10   95.59   12.10
   1  -2 -10   72.29   11.10
   1  -2  10   96.19   12.90
  -1   2  10   87.09   13.40
   1  -2  10  118.59   15.70
   1  -2  10   88.39   12.40
   1  -1  10  879.11   40.90
  -1   1  10  901.21   42.20
   1  -1  10  809.82   40.00
  -1   1  10  837.72   41.80
   1  -1  10  839.62   41.30
   1   0 -10  113.99   13.80
  -1   0  10   85.59   13.10
   1   0  10   77.59   11.70
  -1   0  10   95.59   12.70
  -1   0  10   96.69   13.20
   1   1 -10  811.62   38.90
   1   1 -10  808.02   38.50
  -1  -1  10  846.82   40.60
  -1  -1  10  870.71   41.20
   1   1  10  860.11   40.40
  -1  -1  10  931.41   42.20
   1   2 -10   95.69   12.70
   1   2 -10   86.09   11.50
   1   2 -10   70.29   10.50
  -1  -2  10   65.19   10.80
  -1  -2  10   77.39   12.00
  -1  -2  10   82.99   12.80
   1   3 -10  255.37   16.50
   1   3 -10  243.78   16.80
  -1  -3  10  272.07   19.00
  -1  -3  10  290.97   19.70
  -1  -3  10  257.87   19.20
  -1  -3  10  251.77   17.00
  -1  -3  10  305.37   18.00
  -1  -3  10  256.57   16.50
   1   4 -10    8.20    5.20
   1   4 -10   20.30    9.10
  -1  -4  10    4.20    4.40
  -1  -4  10    5.80    4.90
  -1  -4  10   15.10    5.30
  -1  -4  10   19.80    6.20
  -1  -4  10   -1.50    4.40
  -1  -4  10    1.30    4.10
  -1  -4  10   19.30    6.70
  -1  -5  10  835.82   39.50
  -1  -5  10  815.02   39.00
  -1  -5  10  815.32   36.30
  -1  -5  10  774.52   38.20
  -1  -5  10  845.72   37.30
  -1  -5  10  767.82   33.60
  -1  -5  10  799.02   35.90
  -1  -6  10   -2.80    2.80
  -1  -6  10    4.90    4.10
  -1  -6  10    2.40    4.20
  -1  -6  10   -5.30    2.40
  -1  -6  10    0.40    3.10
  -1  -6  10    9.30    4.80
  -1  -7 -10   22.50    7.30
  -1  -7  10    1.50    3.40
  -1  -7  10    5.40    4.20
  -1  -7  10    7.40    4.30
  -1  -7  10    3.70    3.90
  -1  -7  10    7.40    4.30
  -1  -8 -10   20.60    5.90
  -1  -8  10   32.10    6.40
   1   8  10   31.90    5.20
  -1  -8  10   24.90    4.60
  -1  -8  10   24.10    6.00
  -1  -8  10   47.80    7.10
  -1  -8  10   23.30    5.60
   1  -7 -11  229.28   15.50
   1  -7  11  257.87   15.40
  -1   7  11  244.98   13.90
   1  -7  11  251.27   13.90
   1  -7  11  230.58   14.10
   1  -7  11  237.18   13.00
   1  -6 -11   31.50    7.30
  -1   6  11   40.00    6.90
   1  -6  11   27.80    7.30
   1  -6  11   31.80    6.30
   1  -6  11   31.20    6.20
   1  -5 -11  241.78   17.90
  -1   5 -11  233.88   15.30
   1  -5 -11  195.88   12.70
   1  -5  11  221.88   18.40
  -1   5  11  219.38   15.40
   1  -5  11  215.18   14.00
   1  -5  11  198.78   15.50
   1  -5  11  216.68   16.90
   1  -5  11  213.98   15.10
  -1   4 -11    4.40    4.20
   1  -4 -11    9.10    6.30
  -1   4 -11   12.90    6.10
  -1   4  11   -0.20    3.10
   1  -4  11    4.70    4.10
   1  -4  11    7.50    3.90
   1  -4  11    9.50    5.10
   1  -4  11    5.90    4.90
   1  -4  11    4.70    3.70
   1  -3 -11  425.76   23.30
  -1   3 -11  402.46   22.40
   1  -3  11  442.46   22.80
   1  -3  11  385.16   21.20
   1  -3  11  417.56   21.90
   1  -3  11  443.06   24.20
  -1   3  11  431.26   25.00
   1  -3  11  418.06   24.80
  -1   3  11  440.76   25.00
  -1   3  11  436.66   23.80
  -1   2 -11   15.60    5.70
   1  -2 -11   -3.60    4.50
  -1   2  11   -2.30    2.60
   1  -2  11    4.50    4.20
  -1   2  11   -2.40    3.10
   1  -2  11   -1.20    3.20
   1  -1 -11  109.19   13.60
  -1   1  11  125.19   15.10
   1  -1  11  136.09   13.20
   1  -1  11  105.99   11.20
  -1   1  11  124.49   12.70
   1   0 -11   -1.40    3.70
  -1   0  11    7.40    4.40
   1   0  11   -0.10    4.10
   1   0  11    1.70    3.60
  -1   0  11   -1.20    2.80
  -1   0  11    1.80    3.30
   1   1 -11  123.39   12.00
   1   1 -11  116.09   11.70
  -1  -1  11  122.79   10.50
  -1  -1  11  116.09   11.70
   1   1  11  120.69   11.70
  -1  -1  11  115.99   12.00
  -1  -1  11  127.09   12.70
   1   2 -11    3.60    4.10
  -1  -2  11   -0.80    2.90
  -1  -2  11   11.10    3.80
  -1  -2  11   10.90    4.90
  -1  -2  11   -2.20    2.90
   1   2  11    6.10    4.30
  -1  -2  11   11.50    5.60
   1   3 -11  425.66   22.90
  -1  -3  11  422.26   22.20
  -1  -3  11  409.56   24.50
  -1  -3  11  404.76   21.70
  -1  -3  11  447.86   25.10
  -1  -3  11  403.06   24.20
   1   4 -11    2.20    6.60
   1   4 -11    2.90    4.70
   1   4 -11    5.90    3.60
  -1  -4  11    4.10    3.90
  -1  -4  11   -2.20    3.50
  -1  -4  11    0.70    4.40
  -1  -4  11    4.10    3.40
  -1  -4  11   25.80    8.80
  -1  -4  11   -0.80    2.90
   1   5 -11  202.68   16.10
  -1  -5 -11  215.38   12.30
  -1  -5  11  200.18   15.10
  -1  -5  11  207.68   13.10
  -1  -5  11  202.38   14.90
  -1  -5  11  210.68   12.00
  -1  -5  11  200.88   14.80
  -1  -5  11  224.28   14.20
  -1  -5  11  194.58   13.40
  -1  -6  11   51.99    7.20
  -1  -6  11   39.40    6.80
  -1  -6  11   27.90    6.40
  -1  -6  11   33.80    7.10
   1   7  11  203.78   13.00
  -1  -7  11  271.87   14.30
  -1  -7  11  225.88   13.80
  -1  -7  11  237.78   14.30
  -1  -7  11  235.68   12.70
   1  -6 -12   10.60    4.10
   1  -6  12    4.30    3.20
  -1   6  12    6.80    2.70
   1  -6  12    7.90    3.70
  -1   6  12    6.60    2.80
   1  -5 -12  245.68   16.30
   1  -5  12  230.18   13.00
  -1   5  12  249.48   13.80
   1  -5  12  234.68   13.80
   1  -5  12  207.98   14.20
  -1   5  12  227.88   13.90
  -1   4 -12    4.90    3.50
   1  -4 -12    2.70    3.90
  -1   4  12    0.20    2.80
   1  -4  12    3.70    3.40
   1  -4  12    6.40    4.40
  -1   4  12    8.60    4.00
  -1   3 -12   14.50    4.80
   1  -3 -12   12.50    4.90
   1  -3  12    6.60    4.20
  -1   3  12    5.80    3.80
  -1   3  12    6.40    4.80
   1  -3  12   13.50    6.30
   1  -2 -12   82.59   10.40
  -1   2  12   68.99   10.00
  -1   2  12   63.89    9.70
  -1   2  12   84.89    9.90
   1  -1 -12  175.58   13.50
  -1   1  12  165.08   13.70
  -1   1  12  171.28   13.70
   1   0 -12   13.20    6.10
  -1   0  12   22.50    6.40
   1   0  12   29.30    7.40
  -1   0  12   28.80    6.10
   1   0  12   18.70    5.70
   1   0  12   21.90    5.00
  -1   0  12   22.20    6.00
   1   1 -12  155.58   12.60
  -1  -1  12  177.88   11.40
  -1  -1  12  168.98   13.40
  -1  -1  12  173.78   11.40
   1   1  12  146.89   13.20
  -1  -1  12  150.58   13.10
   1   1  12  166.88   12.60
  -1  -2  12   99.79   12.10
  -1  -2  12   67.89    9.90
   1   3 -12   10.40    3.90
  -1  -3  12   13.20    4.90
  -1  -3  12    8.50    4.50
  -1  -3  12    3.90    3.50
  -1  -3  12    8.70    3.70
   1   4 -12    5.60    4.50
   1   4 -12    4.60    3.30
   1   4 -12    5.40    3.70
  -1  -4  12    4.50    2.90
  -1  -4  12   -2.10    2.40
  -1  -4  12    6.00    3.60
  -1  -4  12    2.80    3.60
  -1  -4  12   -1.00    2.60
   1   5 -12  231.18   14.10
  -1  -5  12  232.28   14.30
  -1  -5  12  213.28   13.90
  -1  -5  12  233.58   13.10
  -1  -6  12    8.90    3.70
  -1  -6  12    5.00    3.00
  -1  -6  12    2.20    2.80
  -1   3 -13  178.38   10.70
   1  -3 -13  160.78   10.40
  -1   3 -13  175.88   12.70
  -1   3  13  158.58   10.10
  -1   3  13  166.58   12.30
   1  -3  13  161.08   11.50
  -1   3  13  158.88   10.30
   1  -3  13  173.28   11.60
   1  -2 -13   31.90    6.20
  -1   2  13   26.60    5.40
   1  -2  13   39.40    5.50
   1  -2  13   26.40    5.70
  -1   2  13   22.40    4.80
  -1   2  13   23.40    4.70
   1  -1 -13   50.79    7.60
  -1   1  13   58.69    6.90
  -1   1  13   42.40    6.70
  -1   1  13   51.39    7.60
   1   0 -13    5.00    3.80
  -1   0  13    0.50    3.00
   1   0  13    0.00    2.30
   1   0  13   -0.60    3.20
  -1   0  13    0.40    3.10
  -1   0  13    2.60    2.80
   1   1 -13   45.60    6.90
  -1  -1  13   49.80    7.50
   1   1  13   50.79    7.40
  -1  -1  13   46.40    7.20
   1   2 -13   28.20    5.40
  -1  -2  13   27.50    5.60
   1   2  13   26.20    5.60
  -1  -2  13   20.90    5.00
   1   2  13   30.00    4.80
   1   3 -13  168.78   10.60
  -1  -3  13  153.48   10.70
  -1  -3  13  164.88   11.20
  -1  -3  13  187.38   10.00
   2 -12   0  461.55   27.70
   2 -12   0  441.96   23.70
  -2  12   0  442.96   22.30
  -2  12   0  488.65   20.60
   2 -11   0    1.40    4.20
  -2  11   0    8.10    5.20
  -2  11   0   -1.20    3.70
   2 -11   0   12.20    5.70
  -2  10   0    6.40    3.70
   2 -10   0    9.40    6.00
  -2  10   0   13.60    4.70
   2 -10   0   21.00    7.20
   2  -9   0    0.00    3.60
  -2   9   0   -0.90    2.20
   2  -9   0    1.00    3.90
   2  -9   0    2.40    4.30
  -2   8   0   51.69    7.10
   2  -8   0   35.10    8.30
   2  -8   0   47.50    8.80
   2  -8   0   56.19   10.80
   2  -7   0    8.40    6.00
   2  -7   0    1.40    1.90
  -2   7   0    4.60    3.20
   2  -7   0    5.10    3.90
  -2   7   0    1.00    2.10
   2  -6   0 1525.45   61.59
  -2   6   0 1499.85   55.49
   2  -5   0    5.40    4.00
  -2   5   0    2.20    2.00
   2  -4   0 1471.65   55.69
   2  -1   0   25.20    2.40
   2  -1   0   24.70    2.30
   2   1   0   23.80    2.00
   2   1   0   28.00    2.20
  -2  -2   0   10.60    7.90
  -2  -3   0   -3.90    8.10
  -2  -4   0 1319.57   56.29
  -2  -5   0    2.00    2.10
  -2  -5   0    9.20    4.90
  -2  -6   0 1330.07   52.79
  -2  -6   0 1373.66   54.89
  -2  -7   0    0.40    2.50
  -2  -7   0    3.30    3.20
  -2  -7   0    3.30    3.50
  -2  -7   0    3.90    4.20
  -2  -7   0    4.80    4.50
  -2  -8   0   54.59   12.00
  -2  -8   0   49.60   10.20
  -2  -8   0   58.29   10.10
  -2  -8   0   45.20    8.40
  -2  -8   0   48.00    8.50
  -2  -9   0    0.60    6.60
  -2  -9   0   -3.30    4.70
   2   9   0    4.60    2.80
  -2  -9   0   -3.70    4.10
  -2  -9   0    0.30    3.20
  -2 -10   0    4.40    6.70
  -2 -10   0    8.40    7.20
  -2 -10   0   15.20    6.90
  -2 -11   0    8.70    5.50
  -2 -11   0    3.40    5.90
  -2 -12   0  455.05   25.30
   2  12   0  439.16   21.50
   2 -12  -1   44.10    8.10
  -2  12  -1   35.20    7.10
   2 -12   1   31.50    7.60
  -2  12   1   34.80    6.80
  -2  12   1   30.20    5.30
  -2  12   1   38.70    7.30
   2 -11  -1   64.59   10.70
   2 -11  -1   50.89    9.60
   2 -11   1   53.69   10.00
  -2  11   1   77.79    8.60
   2 -11   1   60.89   10.70
  -2  11   1   70.29    9.30
  -2  11   1   72.29   10.70
   2 -10  -1  205.38   16.90
   2 -10  -1  206.98   17.10
  -2  10   1  207.28   12.70
  -2  10   1  198.78   14.50
  -2  10   1  207.18   15.00
   2 -10   1  210.98   17.50
   2 -10   1  206.48   16.40
   2  -9  -1   59.79   11.10
   2  -9  -1   78.59   12.50
  -2   9   1   86.79    9.80
   2  -9   1   72.39   12.00
   2  -9   1   72.19   11.90
   2  -9   1   76.79   11.70
  -2   9   1   59.89    9.00
   2  -8  -1 1115.79   48.10
   2  -8  -1 1083.79   43.70
   2  -8   1 1152.48   52.59
   2  -8   1 1087.09   48.20
   2  -8   1 1011.20   46.30
   2  -8   1 1171.38   49.90
  -2   8   1 1090.19   45.00
  -2   8   1 1065.19   42.50
   2  -8   1 1074.49   47.40
   2  -7  -1   81.69   11.00
  -2   7  -1   68.19    6.20
   2  -7  -1   68.69    8.30
   2  -7   1   72.49   10.90
  -2   7   1   72.09    7.10
  -2   7   1   66.19    6.30
   2  -7   1   70.49   11.70
   2  -7   1   70.79   11.60
   2  -7   1   78.89   11.30
   2  -6  -1   14.70    5.40
  -2   6   1   10.60    3.30
   2  -6   1    1.70    3.30
  -2   6   1    9.90    3.20
   2  -5  -1    1.50    2.50
   2  -5  -1   -0.60    3.40
   2  -5   1    2.50    2.90
  -2   5   1    1.60    2.00
  -2   5   1    1.40    2.10
   2  -4  -1   72.19    8.50
   2  -4  -1   62.59    5.40
   2  -4   1   59.69    6.50
   2  -3  -1   85.19    5.50
  -2   1  -1  122.09    5.40
   2  -1  -1  113.29    5.80
  -2   1  -1  128.19    6.10
   2  -1   1  114.79    5.70
  -2   0   1    0.70    1.00
  -2   0   1    1.50    1.20
  -2  -2   1 7116.89  244.98
   2   3   1  103.39    6.00
  -2  -3   1   99.39    7.10
  -2  -4  -1   58.99    5.80
  -2  -4   1   57.29    6.30
   2   4   1   63.69    5.00
   2   4   1   59.59    4.60
  -2  -5  -1    3.50    2.60
   2   5   1    2.00    1.90
   2   5   1   -2.00    1.70
  -2  -5   1   -0.20    2.60
  -2  -5   1    3.60    3.30
  -2  -6  -1    8.20    3.50
  -2  -6   1    7.80    3.70
  -2  -6   1    9.10    4.40
  -2  -6   1    7.80    3.10
   2   6   1    9.30    2.80
  -2  -7  -1   65.59    9.60
  -2  -7  -1   75.89   10.20
  -2  -7  -1   53.89   10.10
  -2  -7  -1   68.19   10.60
  -2  -7  -1   77.29    6.70
  -2  -7   1   70.39   10.50
   2   7   1   81.09    7.40
  -2  -7   1   97.69   12.50
  -2  -7   1   61.79    9.50
   2   7   1   72.29    6.90
  -2  -7   1   58.49    8.50
  -2  -7   1   84.29   11.90
  -2  -7   1   66.39   10.50
  -2  -7   1   59.29    9.20
  -2  -8  -1 1090.09   48.60
  -2  -8  -1 1104.59   47.10
  -2  -8  -1 1046.90   50.49
   2   8   1 1047.80   43.40
  -2  -8   1 1048.80   46.30
  -2  -8   1 1065.59   49.40
  -2  -8   1 1098.39   50.99
  -2  -8   1 1057.79   46.20
  -2  -8   1  992.00   44.80
  -2  -9  -1   60.49   12.00
  -2  -9  -1   66.99   13.90
  -2  -9  -1   57.59   10.70
  -2  -9   1   59.99   10.60
   2   9   1   48.70    7.80
  -2  -9   1   55.39   11.80
   2   9   1   83.89    9.10
  -2  -9   1   49.00   12.90
  -2  -9   1   83.09   14.50
  -2 -10  -1  228.88   20.20
  -2 -10  -1  189.98   17.90
  -2 -10  -1  201.18   16.40
   2  10   1  218.28   12.50
   2  10   1  207.88   14.40
  -2 -10   1  207.38   18.30
  -2 -10   1  181.78   17.90
   2  10   1  154.08   16.10
  -2 -10   1  188.88   15.50
  -2 -11  -1   70.99   11.70
  -2 -11  -1   47.50   10.70
   2  11   1   97.79   10.10
   2  11   1   80.69    7.60
  -2 -11   1   65.09   11.90
  -2 -11   1   70.79   10.50
  -2 -11   1   50.69    9.90
  -2 -12  -1   36.30    8.40
   2  12   1   34.90    5.40
  -2 -12   1   30.20    7.90
   2  12   1   43.70    7.10
   2 -12  -2   65.29   10.00
  -2  12   2   72.79    7.90
   2 -12   2   60.39    9.20
  -2  12   2   64.09    7.40
  -2  12   2   73.89    6.90
   2 -11  -2  118.59   14.20
   2 -11  -2   90.39   12.30
   2 -11   2   95.69   17.10
  -2  11   2  135.79   10.80
  -2  11   2  103.29   10.80
   2 -11   2   89.49   12.40
  -2  11   2  124.19    9.40
   2 -10  -2  742.13   37.60
   2 -10  -2  786.62   37.00
   2 -10   2  707.33   35.90
  -2  10   2  809.92   34.90
  -2  10   2  747.23   40.80
   2 -10   2  722.33   35.40
  -2  10   2  728.33   31.60
   2 -10   2  674.63   36.30
   2  -9  -2  409.36   20.80
   2  -9  -2  431.86   25.70
   2  -9  -2  428.96   26.20
   2  -9  -2  483.45   26.50
   2  -9   2  442.56   25.10
   2  -9   2  392.36   23.70
  -2   9   2  431.96   20.60
   2  -9   2  408.76   25.50
   2  -9   2  403.36   28.00
  -2   9   2  406.36   23.10
  -2   9   2  402.46   23.10
   2  -8  -2  226.08   14.70
   2  -8  -2  184.28   16.00
  -2   8   2  235.08   13.50
  -2   8   2  197.78   14.70
   2  -8   2  235.78   16.60
  -2   8   2  226.38   15.00
   2  -8   2  224.38   19.10
  -2   8   2  232.68   15.20
   2  -8   2  237.78   17.80
   2  -8   2  250.07   16.80
   2  -8   2  250.47   17.60
   2  -7  -2    8.30    4.30
   2  -7  -2    7.40    4.10
   2  -7   2   20.90    5.40
   2  -7   2   17.80    7.00
  -2   7   2   15.20    4.80
   2  -7   2   13.80    5.40
  -2   7   2   12.40    3.80
   2  -7   2   19.20    7.00
   2  -6  -2 3723.13  137.69
  -2   6   2 3926.91  136.69
   2  -6   2 3878.71  140.89
   2  -5  -2  177.18   11.20
  -2   5   2  204.48   11.00
   2  -5   2  169.48   12.30
   2  -4  -2  408.76   19.50
   2  -4  -2  399.76   17.90
   2  -4   2  372.46   18.70
  -2   3  -2 1033.80   37.70
   2  -3  -2  977.40   37.90
   2  -3  -2 1043.20   38.00
  -2   2  -2 2848.52   99.29
  -2   1  -2  272.07   12.00
  -2   1  -2  268.87   10.60
   2  -1  -2  238.68   11.20
  -2  -2   2 3117.19  109.49
  -2  -3   2 1190.48   44.30
  -2  -4   2  415.06   19.50
  -2  -5  -2  198.48   12.70
  -2  -5   2  200.28   13.10
  -2  -6  -2 3444.06  128.89
  -2  -6  -2 3505.65  128.59
  -2  -6   2 3464.55  127.39
  -2  -6   2 3736.03  129.99
  -2  -6   2 3448.75  125.89
   2   6   2 3945.11  126.69
  -2  -6   2 3194.18  128.09
  -2  -7  -2    9.30    4.60
  -2  -7  -2   19.50    4.60
  -2  -7  -2   11.20    5.10
  -2  -7  -2    5.20    4.20
  -2  -7   2   18.40    6.00
   2   7   2   10.60    3.90
  -2  -7   2   13.00    4.90
  -2  -7   2   16.20    6.10
  -2  -7   2   16.70    6.50
  -2  -7   2   17.20    6.50
  -2  -7   2   12.60    4.90
  -2  -7   2    3.90    4.10
  -2  -7   2   15.00    4.40
   2   7   2   13.30    4.00
  -2  -7   2   19.20    5.80
  -2  -7   2   17.70    5.40
  -2  -8  -2  236.48   18.10
  -2  -8  -2  233.88   13.90
  -2  -8  -2  226.78   17.00
  -2  -8  -2  242.28   16.90
  -2  -8   2  197.48   18.00
   2   8   2  211.88   25.60
  -2  -8   2  229.08   15.90
  -2  -8   2  203.88   14.40
  -2  -8   2  214.18   15.80
   2   8   2  241.48   15.00
   2   8   2  251.47   15.20
  -2  -8   2  204.78   16.10
  -2  -8   2  230.08   19.20
  -2  -8   2  244.98   18.20
  -2  -8   2  225.68   16.80
  -2  -9  -2  414.66   26.00
  -2  -9  -2  402.26   27.60
  -2  -9  -2  409.36   24.70
   2   9   2  393.56   22.10
  -2  -9   2  426.16   29.30
   2   9   2  399.46   22.50
  -2  -9   2  391.96   27.00
  -2  -9   2  412.26   24.20
  -2  -9   2  431.76   27.30
  -2  -9   2  377.86   23.00
   2   9   2  404.36   19.80
  -2 -10  -2  711.13   39.80
  -2 -10  -2  734.03   38.50
   2  10   2  747.63   33.70
  -2 -10   2  739.33   39.50
  -2 -10   2  752.22   35.60
  -2 -10   2  683.93   37.60
   2  10   2  703.03   34.40
   2  10   2  733.03   31.50
   2  10   2  819.52   39.30
  -2 -11  -2  108.59   15.10
  -2 -11  -2  122.19   16.40
   2  11   2  112.19   11.40
  -2 -11   2  121.19   11.70
   2  11   2  117.49    9.30
  -2 -11   2  103.09   15.00
   2  11   2  122.49   11.00
  -2 -12  -2   76.79   11.60
  -2 -12   2   73.29   10.40
   2  12   2   79.99    7.10
   2  12   2   82.09    7.80
   2  12   2   58.59    7.70
   2 -12  -3   27.70    7.00
  -2  12   3   24.80    4.80
  -2  12   3   31.50    5.40
   2 -12   3   21.90    5.90
  -2  12   3   29.20    5.00
  -2  12   3   31.30    6.10
   2 -11  -3   11.90    5.70
   2 -11   3   15.80    9.20
  -2  11   3    8.00    4.70
   2 -11   3    3.30    4.60
  -2  11   3   17.80    7.90
  -2  11   3    7.50    3.80
   2 -10  -3  454.95   25.90
   2 -10  -3  441.36   26.20
   2 -10  -3  413.26   25.50
   2 -10   3  414.96   24.40
   2 -10   3  418.46   24.70
  -2  10   3  408.66   21.10
  -2  10   3  459.75   23.70
   2  -9  -3   20.50    6.90
   2  -9  -3   13.00    5.20
  -2   9   3    7.40    4.00
   2  -9   3   13.40    7.30
   2  -9   3   21.00    7.00
  -2   9   3    8.10    4.50
   2  -9   3   12.80    5.80
  -2   9   3   16.20    5.60
   2  -9   3   20.70    7.10
  -2   9   3    9.10    4.00
   2  -9   3    5.10    5.30
   2  -8  -3  589.94   30.60
   2  -8  -3  597.74   30.10
  -2   8   3  598.94   28.50
   2  -8   3  555.44   29.80
   2  -8   3  593.14   32.50
   2  -8   3  557.54   31.10
   2  -8   3  580.44   31.70
  -2   8   3  574.84   28.90
  -2   8   3  560.44   28.90
  -2   8   3  529.95   28.50
   2  -8   3  603.34   33.80
   2  -7  -3   30.90    6.80
   2  -7  -3   30.10    7.50
   2  -7   3   29.30    7.80
   2  -7   3   23.50    6.60
  -2   7   3   26.50    5.90
   2  -7   3   32.90    7.20
   2  -7   3   19.10    5.30
  -2   7   3   25.00    6.20
   2  -7   3   37.00    8.00
  -2   7   3   33.00    5.50
   2  -7   3   24.70    6.50
  -2   7   3   22.30    5.80
   2  -6  -3   61.99    9.00
  -2   6   3   49.50    7.40
   2  -6   3   57.19   10.00
   2  -5  -3 1546.05   59.39
  -2   5   3 1563.64   58.79
   2  -5   3 1523.25   60.69
   2  -4  -3 1288.47   49.10
   2  -4  -3 1308.77   49.90
  -2   4  -3 1296.27   49.30
   2  -4  -3 1424.86   50.99
   2  -4   3 1368.66   51.89
   2  -3  -3  385.66   17.20
  -2   3  -3  370.06   17.00
   2  -3  -3  409.06   17.50
   2  -3  -3  381.66   17.40
   2  -3   3  361.36   17.60
  -2   1  -3  732.53   27.30
  -2  -1   3  807.42   36.50
  -2  -2   3 4132.09  142.39
  -2  -3   3  420.46   18.20
  -2  -4   3 1501.45   56.59
  -2  -5  -3 1295.97   55.29
  -2  -5   3 1372.46   53.79
  -2  -5   3 1395.96   55.19
  -2  -5   3 1532.15   55.79
  -2  -6  -3   36.70    7.10
   2   6   3   53.09    6.90
  -2  -6   3   55.19    9.10
  -2  -6   3   48.10    6.50
  -2  -6   3   44.80    7.10
  -2  -6   3   51.69    6.90
  -2  -7  -3   25.90    5.40
  -2  -7  -3   33.30    8.20
  -2  -7   3   33.70    6.90
  -2  -7   3   29.90    7.30
  -2  -7   3   24.90    7.00
  -2  -7   3   29.30    8.80
   2   7   3   25.70    5.90
  -2  -7   3   28.40    8.70
  -2  -7   3   19.70    4.60
  -2  -7   3   24.20    7.30
  -2  -7   3   18.00    5.40
  -2  -7   3   30.50    7.00
  -2  -7   3   16.10    6.00
   2   7   3   25.40    5.80
  -2  -7   3   36.80    7.60
  -2  -8  -3  580.44   28.00
  -2  -8  -3  530.15   33.90
  -2  -8   3  541.85   32.20
  -2  -8   3  594.74   29.60
  -2  -8   3  589.74   29.00
   2   8   3  560.74   28.60
   2   8   3  592.54   28.20
  -2  -8   3  594.44   39.90
  -2  -8   3  627.64   32.80
   2   8   3  585.24   28.90
  -2  -8   3  555.64   33.80
   2   8   3  544.55   28.10
  -2  -8   3  560.24   32.80
  -2  -9  -3   11.70    6.20
  -2  -9  -3   11.30    4.50
  -2  -9   3   12.00    5.80
  -2  -9   3    9.70    5.30
  -2  -9   3   13.10    7.40
  -2  -9   3   15.90    7.20
  -2  -9   3   12.00    5.60
   2   9   3    9.50    4.60
  -2  -9   3   13.90    6.80
  -2  -9   3   12.00    5.90
   2   9   3   14.80    6.30
   2   9   3   13.10    4.50
   2   9   3    9.20    5.50
   2   9   3   13.00    4.70
  -2 -10  -3  429.26   28.50
  -2 -10  -3  434.76   26.70
   2  10   3  451.55   21.50
   2  10   3  433.06   24.30
   2  10   3  408.76   23.40
  -2 -10   3  421.26   23.80
   2  10   3  439.16   23.00
  -2 -10   3  423.26   28.50
  -2 -10   3  418.56   25.30
  -2 -10   3  413.46   27.30
  -2 -11  -3   16.90    8.00
  -2 -11  -3   15.10    6.80
  -2 -11   3    4.80    4.40
   2  11   3    9.90    5.40
  -2 -11   3   10.80    6.30
   2  11   3    8.70    3.30
   2  11   3   18.30    5.90
  -2 -12  -3   26.80    5.90
  -2 -12  -3   27.80    7.30
   2  12   3   30.00    5.30
   2  12   3   19.10    4.10
   2  12   3   23.00    5.40
   2 -12  -4  180.58   13.50
  -2  12   4  198.68   11.10
   2 -12   4  184.18   12.20
  -2  12   4  172.38   11.40
   2 -11  -4    0.70    4.40
   2 -11   4    8.70    5.10
  -2  11   4    3.60    3.00
  -2  11   4    2.50    4.80
  -2  11   4    6.20    3.50
  -2  11   4   -2.60    3.70
   2 -11   4    4.40    4.40
   2 -10  -4  200.58   16.60
   2 -10  -4  200.28   13.10
   2 -10  -4  204.78   16.50
  -2  10   4  208.18   13.20
   2 -10   4  179.38   15.20
  -2  10   4  211.88   14.50
   2 -10   4  199.48   15.60
   2  -9  -4   44.90    8.40
  -2   9   4   49.99    9.10
   2  -9   4   75.39   11.90
  -2   9   4   48.90    8.10
   2  -9   4   50.29    9.70
   2  -9   4   36.00    9.50
  -2   9   4   45.10    9.10
   2  -9   4   55.39   10.00
   2  -8  -4  636.74   33.60
   2  -8  -4  655.13   32.30
   2  -8  -4  630.04   32.80
  -2   8   4  700.33   31.90
   2  -8   4  599.14   35.30
   2  -8   4  642.94   32.40
   2  -8   4  684.33   35.00
  -2   8   4  624.04   33.10
   2  -8   4  651.63   33.70
   2  -8   4  623.04   31.60
  -2   8   4  623.84   39.00
   2  -7  -4   13.90    5.40
   2  -7  -4   13.80    5.40
   2  -7  -4   23.30    6.80
   2  -7   4   14.00    6.30
   2  -7   4   11.10    5.10
   2  -7   4   21.50    6.70
   2  -7   4   13.60    6.00
   2  -7   4   24.00    5.80
   2  -7   4   12.50    5.50
  -2   7   4   11.80    4.00
  -2   7   4   19.30    5.40
  -2   7   4    9.40    4.20
   2  -7   4   11.50    5.40
   2  -6  -4  939.51   41.80
   2  -6  -4  962.00   42.20
   2  -6   4  942.21   41.80
  -2   6   4  858.11   39.80
   2  -6   4  989.50   42.80
   2  -6   4  895.81   39.90
   2  -6   4  971.30   42.50
  -2   5  -4 1018.50   41.60
   2  -5  -4 1074.09   44.20
  -2   5   4 1089.49   43.90
   2  -5   4 1088.59   45.10
   2  -4  -4  226.08   13.20
   2  -4  -4  212.88   12.70
  -2   4  -4  249.58   13.10
   2  -4  -4  228.58   13.60
  -2   4   4  238.38   13.70
   2  -4   4  259.07   14.50
  -2   3  -4  851.81   34.90
   2  -3  -4  842.42   34.70
   2  -3  -4  862.41   34.60
   2  -3   4  874.91   35.10
  -2   2  -4 1185.28   41.20
   2  -2   4 1058.99   42.70
  -2   1  -4 1140.69   41.10
  -2  -1   4 1165.68   51.29
   2   2  -4 1241.98   46.40
  -2  -3   4  952.20   36.50
  -2  -4   4  222.88   12.10
  -2  -4   4  274.17   13.90
  -2  -5   4 1094.49   43.60
  -2  -5   4 1000.90   40.60
  -2  -6   4  835.32   36.70
  -2  -6   4  936.51   38.50
  -2  -6   4  946.71   41.00
  -2  -6   4  867.71   39.40
  -2  -6   4  879.71   37.50
  -2  -6   4  959.30   41.60
  -2  -6   4  948.71   41.40
  -2  -6   4  996.80   42.40
  -2  -6   4 1023.90   41.80
   2   7  -4   16.90    5.70
  -2  -7  -4   13.40    4.90
  -2  -7   4   19.00    6.90
  -2  -7   4   12.80    5.40
   2   7   4   14.50    4.80
  -2  -7   4   15.30    5.40
   2   7   4   12.00    4.60
  -2  -7   4   10.80    5.20
  -2  -7   4   20.50    6.60
  -2  -7   4    6.30    5.00
  -2  -7   4   10.80    4.60
  -2  -7   4   13.90    5.30
  -2  -7   4   21.00    6.00
  -2  -7   4   12.30    6.20
   2   7   4   15.50    5.00
  -2  -8  -4  675.33   34.00
  -2  -8  -4  634.64   31.10
  -2  -8   4  651.43   33.50
  -2  -8   4  685.53   32.80
   2   8   4  634.44   30.70
  -2  -8   4  636.24   34.00
  -2  -8   4  636.84   41.70
  -2  -8   4  676.43   32.60
   2   8   4  585.94   30.30
   2   8   4  585.94   36.50
  -2  -8   4  621.94   31.20
  -2  -8   4  650.23   35.80
  -2  -9  -4   53.59    8.60
  -2  -9  -4   46.40    9.90
  -2  -9   4   57.59   10.90
  -2  -9   4   43.80    8.30
  -2  -9   4   59.99   10.60
  -2  -9   4   41.80   11.30
   2   9   4   51.99    9.30
  -2  -9   4   46.00    9.70
   2   9   4   54.59    9.50
  -2  -9   4   38.70    8.80
  -2  -9   4   60.89   12.10
  -2  -9   4   59.79   10.70
   2   9   4   54.39    8.70
  -2 -10  -4  202.38   17.10
  -2 -10  -4  212.98   18.90
  -2 -10   4  214.48   18.60
  -2 -10   4  175.28   14.00
   2  10   4  199.18   13.00
  -2 -10   4  187.88   15.10
  -2 -10   4  172.48   16.90
   2  10   4  199.08   13.80
  -2 -11  -4   -0.80    4.80
  -2 -11   4    3.80    3.70
   2  11   4    0.60    2.90
   2  11   4    3.70    4.40
   2  11   4    1.80    3.60
  -2 -12  -4  164.88   11.70
  -2 -12  -4  188.08   14.00
   2  12   4  157.28   10.50
   2  12   4  180.58   11.30
   2 -11  -5    4.00    4.90
  -2  11   5   -1.90    1.90
   2 -11   5    7.20    5.10
  -2  11   5    4.00    3.10
   2 -11   5   -1.00    3.50
   2 -10  -5  256.77   18.40
   2 -10  -5  250.27   15.60
   2 -10   5  238.68   18.20
   2 -10   5  267.27   17.50
   2 -10   5  247.88   23.00
   2 -10   5  266.67   18.20
  -2  10   5  284.47   15.40
  -2  10   5  255.47   16.30
   2  -9  -5    7.10    4.20
   2  -9   5   -1.10    3.30
   2  -9   5   -1.20    3.80
  -2   9   5    5.20    4.40
  -2   9   5    5.20    3.50
  -2   9   5    2.60    3.70
  -2   9   5    7.00    4.80
   2  -9   5   -0.30    4.10
   2  -9   5    3.90    5.70
   2  -9   5    4.70    5.30
   2  -8  -5   96.39   12.40
   2  -8  -5   80.79   13.00
   2  -8   5  109.99   14.00
  -2   8   5   90.99    8.70
  -2   8   5   65.99   10.40
   2  -8   5  101.69    9.20
   2  -8   5   97.49   14.10
  -2   8   5   91.29   11.50
  -2   8   5   83.39   11.80
   2  -8   5   85.79   14.20
   2  -8   5  100.99   13.90
   2  -8   5   78.39   11.20
   2  -8   5   82.39   12.40
   2  -7  -5  243.98   17.80
   2  -7  -5  221.08   17.60
   2  -7   5  253.37   19.10
   2  -7   5  207.58   17.10
   2  -7   5  247.58   16.60
  -2   7   5  246.38   16.40
   2  -7   5  238.48   15.10
   2  -7   5  251.17   18.20
   2  -7   5  235.88   16.20
  -2   7   5  250.97   17.20
   2  -7   5  248.48   17.70
   2  -7   5  253.17   18.50
   2  -6  -5  689.73   34.60
   2  -6  -5  663.13   33.90
   2  -6   5  696.53   33.60
   2  -6   5  713.03   35.20
   2  -6   5  663.83   33.30
   2  -6   5  745.03   35.50
  -2   6   5  736.23   33.70
   2  -6   5  744.03   34.10
  -2   6   5  713.73   32.90
   2  -6   5  740.43   34.70
   2  -6   5  738.93   31.80
   2  -6   5  678.53   32.30
   2  -5  -5  103.99    9.30
  -2   5  -5  114.49    9.40
   2  -5   5  115.49   10.60
  -2   5   5  118.59    9.80
   2  -5   5  120.09   12.90
   2  -5   5  103.29   10.20
  -2   5   5  104.19    9.80
   2  -5   5  133.59   11.70
   2  -5   5  108.69   10.20
   2  -5   5  129.09   10.60
  -2   4  -5  382.56   20.00
   2  -4  -5  392.36   19.70
   2  -4  -5  355.56   16.90
   2  -4  -5  421.76   20.70
   2  -4   5  403.36   20.80
  -2   3  -5   13.70    4.70
   2  -3  -5   12.20    4.10
   2  -3   5   15.20    4.60
  -2   2  -5 4954.10  170.28
  -2   2   5 4915.21  172.78
  -2  -2   5 5636.04  202.18
   2   3  -5   18.10    4.10
  -2  -3   5   17.90    3.70
   2   4  -5  468.65   21.00
  -2  -4   5  425.86   19.90
  -2  -4   5  468.75   21.20
   2   5  -5  109.09    8.60
  -2  -5   5  113.99   11.40
  -2  -5   5  109.49    8.40
  -2  -5   5  113.49   10.60
  -2  -5   5   98.89    7.90
  -2  -5   5  116.69   11.00
  -2  -5   5  132.39   11.20
  -2  -5   5  111.99    9.90
  -2  -5   5  110.99    8.60
   2   6  -5  697.43   30.20
  -2  -6   5  772.12   35.10
  -2  -6   5  726.13   31.60
  -2  -6   5  749.23   33.50
  -2  -6   5  702.83   33.90
  -2  -6   5  630.14   29.20
  -2  -6   5  638.64   31.10
  -2  -6   5  711.03   34.00
  -2  -6   5  695.53   37.90
  -2  -6   5  720.63   33.80
  -2  -6   5  720.03   33.00
  -2  -6   5  640.54   35.80
  -2  -7  -5  260.97   17.70
   2   7  -5  244.68   17.90
  -2  -7   5  236.38   19.60
  -2  -7   5  259.77   20.70
  -2  -7   5  222.58   17.10
  -2  -7   5  245.78   15.50
  -2  -7   5  260.87   16.60
   2   7   5  267.97   16.70
   2   7   5  272.47   17.80
  -2  -7   5  281.87   18.50
  -2  -7   5  265.77   18.90
  -2  -7   5  267.97   18.50
  -2  -7   5  262.17   17.80
  -2  -7   5  230.58   19.60
  -2  -7   5  258.37   20.60
  -2  -8  -5   94.59   12.00
  -2  -8  -5   86.89   12.40
  -2  -8   5  106.99    9.40
  -2  -8   5   91.49   11.60
  -2  -8   5   92.29   12.80
  -2  -8   5   99.29   14.30
  -2  -8   5  113.79   10.80
   2   8   5   78.79   11.10
  -2  -8   5   93.29   13.10
  -2  -8   5   97.09   16.30
  -2  -8   5   89.19   14.60
  -2  -8   5   65.89   12.70
   2   8   5   70.29   10.40
   2   8   5   85.49   11.00
  -2  -8   5  101.09   13.70
  -2  -8   5   92.79   13.10
  -2  -9  -5    4.40    5.20
  -2  -9  -5   -1.40    3.50
  -2  -9   5    1.60    4.80
   2   9   5    4.70    4.30
  -2  -9   5   10.10    6.30
  -2  -9   5   11.70    7.10
  -2  -9   5    2.20    5.20
  -2  -9   5    2.50    4.50
  -2  -9   5   12.00    5.20
   2   9   5    6.40    4.30
   2   9   5    5.90    3.50
  -2  -9   5   21.50    6.30
  -2  -9   5   12.60    6.60
  -2 -10  -5  243.08   20.90
  -2 -10  -5  262.07   15.10
  -2 -10  -5  243.78   18.90
  -2 -10   5  253.57   17.70
  -2 -10   5  283.57   20.20
   2  10   5  272.17   16.40
  -2 -10   5  288.27   16.50
  -2 -11  -5    5.00    5.70
   2  11   5    1.30    2.50
   2 -11  -6    8.70    4.60
  -2  11   6    6.50    2.90
   2 -11   6   10.90    4.30
  -2  11   6    0.20    3.40
   2 -11   6    5.10    4.40
   2 -10  -6  184.88   14.90
   2 -10  -6  159.48   12.10
   2 -10   6  162.48   13.80
  -2  10   6  178.38   12.50
   2 -10   6  198.18   13.70
  -2  10   6  181.48   11.90
   2 -10   6  152.68   14.00
   2  -9  -6   58.29    9.60
   2  -9   6   42.70    8.60
   2  -9   6   41.80    9.00
  -2   9   6   54.89    8.60
   2  -9   6   51.49   10.70
   2  -9   6   38.40    9.00
   2  -9   6   39.20   11.90
   2  -8  -6   89.69   14.50
   2  -8  -6   79.09   11.50
  -2   8   6   82.09   13.20
   2  -8   6   93.89   13.30
   2  -8   6   94.19   13.80
   2  -8   6   96.39   12.50
  -2   8   6   92.09   12.00
   2  -8   6   80.79   12.20
  -2   8   6  122.19   10.90
   2  -8   6   80.69   13.90
   2  -8   6   80.99   12.00
   2  -8   6  102.39   11.50
   2  -7  -6   93.19   13.80
   2  -7  -6  105.99   14.20
   2  -7   6  132.79   15.90
   2  -7   6  115.19   10.90
  -2   7   6  111.49   11.90
   2  -7   6  131.69   13.70
   2  -7   6  108.29   14.00
  -2   7   6  118.09   11.00
   2  -7   6  123.29   15.10
   2  -7   6  104.89   13.70
   2  -7   6  110.29   12.60
   2  -7   6  122.19   11.80
   2  -6  -6 2195.88   85.69
   2  -6  -6 2245.18   86.09
   2  -6  -6 1999.30   78.19
  -2   6   6 2133.79   83.79
   2  -6   6 2114.19   80.79
   2  -6   6 2097.09   83.49
   2  -6   6 2155.08   83.39
   2  -6   6 2218.58   85.59
   2  -6   6 1980.20   81.19
   2  -6   6 2099.99   83.19
  -2   6   6 2222.28   82.29
   2  -6   6 2104.29   84.39
   2  -6   6 2212.88   86.09
   2  -5  -6   60.99   10.50
   2  -5  -6   53.49    8.00
   2  -5  -6   51.69    9.40
  -2   5  -6   52.79    9.30
  -2   5   6   47.80    7.50
   2  -5   6   52.39    9.20
  -2   5   6   39.00    7.60
   2  -5   6   50.59    9.60
   2  -5   6   48.50    8.50
   2  -5   6   44.00    8.10
   2  -5   6   59.39    9.00
   2  -5   6   43.70    8.10
   2  -5   6   49.90    8.70
   2  -5   6   48.90    8.20
   2  -5   6   70.09   10.90
  -2   4  -6   70.29   10.20
   2  -4  -6   71.09    9.00
  -2   4   6   65.09    9.30
   2  -4   6   63.79   10.00
   2  -4   6   88.79   11.60
   2  -4   6   72.39    9.90
   2  -4   6   66.79   10.50
   2  -4   6   60.09    9.10
   2  -4   6   77.49   10.60
  -2   4   6   79.09    9.50
   2  -4   6   68.39    9.90
  -2   3  -6   38.20    5.30
   2  -3   6   51.19    8.00
  -2   3   6   33.80    6.30
   2  -3   6   29.00    6.50
  -2   2  -6  382.36   17.10
  -2   2  -6  370.36   15.90
  -2   2  -6  346.27   16.60
  -2   2   6  315.77   17.40
   2   0  -6  819.82   33.90
   2   2  -6  390.36   19.50
   2   3  -6   32.20    5.90
  -2  -3   6   40.20    6.40
  -2  -3   6   25.20    4.60
   2   4  -6   78.69    7.40
  -2  -4   6   82.79   10.80
  -2  -4   6   75.49   10.30
  -2  -4   6   73.09   12.20
  -2  -4   6   67.29    6.90
  -2  -4   6   88.09   10.10
  -2  -4   6   92.29   11.30
  -2  -4   6   81.89   10.60
  -2  -4   6   67.39   10.00
  -2  -4   6   68.79    6.40
   2   5  -6   48.40    7.20
   2   5  -6   49.00    9.90
  -2  -5   6   40.00    6.40
  -2  -5   6   48.60    8.40
  -2  -5   6   44.10    7.70
  -2  -5   6   57.19    8.80
  -2  -5   6   52.49    9.20
  -2  -5   6   46.00    8.50
  -2  -5   6   52.49    9.50
  -2  -5   6   44.20    7.50
  -2  -5   6   58.99   11.10
  -2  -5   6   68.29   18.40
  -2  -5   6   41.50    8.00
   2   6  -6 2346.17   87.69
  -2  -6   6 2210.08   86.79
  -2  -6   6 2367.56   87.49
  -2  -6   6 2242.28   83.49
  -2  -6   6 2133.39   91.29
  -2  -6   6 1994.60   84.39
  -2  -6   6 2308.07   85.09
  -2  -6   6 2057.99   80.49
  -2  -6   6 2331.37   85.59
  -2  -6   6 2025.60   88.29
  -2  -6   6 2085.39   88.29
  -2  -6   6 2235.38   86.89
  -2  -7  -6  108.69   13.50
  -2  -7   6  103.79   14.10
  -2  -7   6  125.29   10.90
  -2  -7   6  115.79   14.90
  -2  -7   6  120.39   12.50
  -2  -7   6  100.69   13.10
  -2  -7   6   87.49   14.10
  -2  -7   6  126.19   12.50
  -2  -7   6  138.39   13.60
  -2  -7   6  144.69   15.30
  -2  -8  -6   70.39   10.80
  -2  -8  -6   81.79   12.30
  -2  -8   6  103.29   14.30
  -2  -8   6  103.99   14.00
  -2  -8   6  108.99   14.10
  -2  -8   6  110.59   12.60
  -2  -8   6   97.39   15.00
   2   8   6   78.89   11.00
  -2  -8   6  104.19   13.50
   2   8   6   98.89   13.30
  -2  -8   6  109.69    9.60
  -2  -8   6   99.49   10.30
  -2  -8   6   99.39   14.40
   2   8   6   76.79   10.10
  -2  -8   6  119.49   10.70
  -2  -9  -6   41.80    9.10
  -2  -9  -6   37.00    7.90
  -2  -9   6   42.10    9.10
   2   9   6   49.20    7.90
  -2  -9   6   53.79    9.80
  -2  -9   6   46.00   10.70
  -2  -9   6   50.39   10.20
  -2  -9   6   56.09    8.80
  -2  -9   6   43.30    8.90
  -2 -10  -6  181.38   12.10
  -2 -10  -6  184.48   17.30
  -2 -10  -6  192.58   15.30
   2  10   6  179.68   12.40
  -2 -10   6  177.38   14.00
  -2 -10   6  166.18   14.00
  -2 -11  -6   13.90    6.30
  -2 -11  -6    1.20    4.40
   2  11   6    5.80    3.00
   2  11   6    8.80    4.50
   2 -10  -7  142.79   10.90
   2 -10  -7  137.19   12.40
  -2  10   7  148.99   10.90
   2 -10   7  127.89   11.70
   2 -10   7  121.89    9.90
   2 -10   7   99.89   15.40
   2  -9  -7    8.40    4.50
   2  -9   7   12.70    5.20
  -2   9   7    5.50    3.50
   2  -9   7    7.90    4.80
   2  -9   7   13.50    6.60
   2  -9   7   10.90    5.20
   2  -8  -7  577.24   30.70
   2  -8   7  541.35   26.30
   2  -8   7  559.84   31.30
   2  -8   7  546.55   29.50
   2  -8   7  608.34   31.10
   2  -8   7  564.44   27.90
   2  -8   7  522.05   29.30
  -2   8   7  579.04   28.10
   2  -7  -7  113.89   16.10
   2  -7  -7  169.08   15.70
   2  -7   7  152.58   12.50
  -2   7   7  178.98   13.40
   2  -7   7  167.28   14.50
   2  -7   7  160.68   15.80
   2  -7   7  181.48   15.90
   2  -7   7  154.78   14.30
   2  -7   7  160.08   14.20
   2  -7   7  187.38   13.90
  -2   7   7  123.19   16.60
   2  -6  -7  422.76   25.70
   2  -6  -7  400.66   25.20
   2  -6  -7  404.56   19.20
   2  -6   7  342.97   20.50
  -2   6   7  359.86   23.30
   2  -6   7  370.26   22.60
  -2   6   7  417.76   21.60
   2  -6   7  357.16   23.10
   2  -6   7  367.86   20.80
   2  -6   7  348.57   23.60
   2  -6   7  407.96   23.50
   2  -6   7  359.36   22.20
   2  -5  -7   11.70    6.50
  -2   5  -7   21.10    6.60
   2  -5  -7    7.20    3.90
   2  -5   7   12.20    4.80
   2  -5   7   10.00    5.30
  -2   5   7    5.90    4.00
   2  -5   7    0.90    3.90
   2  -5   7   13.80    4.90
   2  -5   7    4.50    3.80
   2  -5   7    7.50    4.60
   2  -5   7   10.60    5.80
  -2   5   7    1.90    3.30
   2  -5   7    9.30    4.80
  -2   4  -7  671.23   28.10
   2  -4  -7  668.63   33.10
  -2   4  -7  675.83   33.40
   2  -4  -7  659.73   31.70
   2  -4  -7  638.54   34.80
   2  -4   7  687.43   30.80
   2  -4   7  604.84   30.80
   2  -4   7  672.63   32.60
   2  -4   7  635.64   31.60
   2  -4   7  627.54   31.00
   2  -4   7  635.24   31.40
   2  -4   7  714.93   33.90
  -2   4   7  683.03   30.00
   2  -4   7  704.13   33.80
  -2   3  -7   24.50    5.00
  -2   3  -7   24.10    7.40
   2  -3  -7   33.90    6.60
  -2   3  -7   25.80    5.00
   2  -3   7   22.60    6.20
  -2   3   7   23.40    5.20
   2  -3   7   27.50    6.40
   2  -3   7   22.70    6.40
   2  -3   7   16.70    5.50
   2  -3   7   30.80    7.00
  -2   2  -7  487.25   21.20
   2  -2  -7  460.25   23.80
  -2   2  -7  506.85   22.50
   2  -2   7  465.65   23.30
   2  -2   7  505.05   26.10
   2   0  -7    5.80    3.80
   2   1  -7  558.84   27.50
  -2  -1   7  612.54   33.50
  -2  -1   7  590.64   29.60
   2   2  -7  540.25   28.80
   2   2  -7  541.35   25.20
  -2  -2   7  557.44   27.70
  -2  -2   7  518.15   26.60
  -2  -2   7  495.45   25.10
  -2  -2   7  466.85   26.30
  -2  -2   7  486.75   26.60
  -2  -2   7  471.75   24.20
  -2  -2   7  547.65   31.00
   2   3  -7   20.70    6.60
   2   3  -7   17.80    4.30
   2   3  -7   21.00    5.70
  -2  -3   7   37.60    6.50
  -2  -3   7   31.10    6.90
  -2  -3   7   46.40   10.10
  -2  -3   7   27.80    8.00
  -2  -3   7   31.10    8.40
  -2  -3   7   28.30    6.90
  -2  -3   7   17.20    5.40
   2   4  -7  725.73   36.50
   2   4  -7  679.93   31.50
  -2  -4   7  702.83   33.80
  -2  -4   7  707.23   32.60
  -2  -4   7  748.53   33.30
  -2  -4   7  747.73   39.50
  -2  -4   7  690.83   35.00
  -2  -4   7  740.13   35.10
  -2  -4   7  728.33   34.80
  -2  -4   7  689.73   30.70
  -2  -4   7  670.73   36.60
   2   5  -7    5.20    3.00
   2   5  -7   11.40    5.30
  -2  -5   7    0.10    3.50
  -2  -5   7    5.70    3.30
  -2  -5   7   11.00    5.10
  -2  -5   7   14.60    6.00
  -2  -5   7    5.40    4.10
  -2  -5   7    7.20    5.60
  -2  -5   7   13.40    5.00
  -2  -5   7    7.30    5.50
  -2  -5   7    8.60    4.50
  -2  -6   7  410.66   22.20
  -2  -6   7  410.86   23.70
  -2  -6   7  415.96   23.50
  -2  -6   7  381.36   24.00
  -2  -6   7  398.86   27.70
  -2  -6   7  416.46   28.00
  -2  -6   7  402.26   24.70
  -2  -6   7  392.66   24.20
  -2  -7   7  175.38   17.10
  -2  -7   7  157.18   14.30
  -2  -7   7  187.38   15.00
  -2  -7   7  178.78   16.40
  -2  -7   7  181.58   13.30
   2   7   7  141.59   14.20
  -2  -7   7  156.28   14.60
  -2  -7   7  165.78   16.60
  -2  -7   7  171.58   15.50
  -2  -7   7  155.98   14.00
  -2  -8  -7  546.45   30.10
  -2  -8   7  559.84   31.50
  -2  -8   7  611.44   31.00
  -2  -8   7  579.24   31.50
  -2  -8   7  564.64   29.70
  -2  -8   7  572.14   29.40
  -2  -8   7  549.05   26.40
  -2  -8   7  542.55   30.60
  -2  -8   7  612.14   29.80
  -2  -9  -7   14.10    5.80
  -2  -9  -7    9.10    5.70
  -2  -9   7   16.90    6.80
  -2  -9   7   13.30    4.40
   2   9   7   11.60    4.60
  -2  -9   7    4.50    4.80
  -2  -9   7   11.70    5.80
  -2  -9   7   11.20    5.10
  -2  -9   7    6.80    5.00
  -2 -10  -7  143.79   10.20
  -2 -10  -7  128.19   11.80
  -2 -10  -7  141.69   14.30
   2  10   7  142.79   10.20
  -2 -10   7  113.79   10.80
   2 -10  -8  231.88   12.90
   2 -10  -8  209.98   14.00
   2 -10   8  217.58   13.50
  -2  10   8  209.78   11.50
   2 -10   8  195.68   13.40
   2  -9  -8    6.10    4.60
   2  -9  -8    3.90    3.70
   2  -9   8   10.60    4.20
   2  -9   8   -3.60    2.30
  -2   9   8    0.40    2.70
   2  -9   8    3.20    3.80
   2  -9   8    2.70    4.10
   2  -8  -8  247.78   17.90
   2  -8   8  239.18   14.50
   2  -8   8  218.98   17.50
   2  -8   8  236.68   17.00
   2  -8   8  229.28   16.80
  -2   8   8  238.58   14.80
   2  -8   8  251.97   15.20
   2  -7  -8   13.40    6.60
   2  -7   8   21.90    7.30
   2  -7   8   17.90    5.90
   2  -7   8   15.80    6.40
  -2   7   8   14.00    4.80
   2  -7   8   16.60    6.10
   2  -7   8   13.00    5.70
   2  -7   8   11.60    5.00
   2  -6  -8  720.83   31.00
   2  -6  -8  716.03   38.40
   2  -6  -8  672.43   37.30
   2  -6   8  764.62   36.60
  -2   6   8  719.93   32.60
   2  -6   8  708.33   32.80
   2  -6   8  697.63   34.60
   2  -6   8  780.02   36.10
   2  -6   8  633.34   36.10
   2  -6   8  751.92   35.50
   2  -6   8  733.93   33.40
   2  -5  -8   11.90    5.90
  -2   5  -8   13.60    6.00
   2  -5  -8   15.70    5.80
   2  -5   8   12.90    5.70
   2  -5   8   10.30    5.40
   2  -5   8   12.90    5.30
   2  -5   8   11.50    5.70
   2  -5   8   16.70    6.60
   2  -5   8    6.80    4.70
   2  -5   8    9.50    5.20
  -2   5   8    6.20    3.50
   2  -5   8   16.70    6.20
  -2   4  -8   94.29    8.90
  -2   4  -8  108.59   12.60
   2  -4  -8  112.79   10.60
   2  -4  -8  119.99   15.40
   2  -4   8  114.19   18.40
   2  -4   8  121.69   15.30
   2  -4   8   94.39   12.50
   2  -4   8  108.09   10.20
  -2   4   8  112.49    9.30
   2  -4   8  107.79   13.60
   2  -4   8  114.59   11.50
  -2   3  -8    1.20    2.60
  -2   3  -8   -0.40    4.00
  -2   3  -8    2.10    3.30
   2  -3   8    0.90    3.30
   2  -3   8   -0.40    2.50
   2  -3   8    3.10    3.20
   2  -3   8    6.60    4.40
   2  -3   8   11.90    4.80
   2  -3   8    7.60    4.20
   2  -3   8   -0.30    2.50
   2  -3   8    8.20    4.10
  -2   3   8   10.20    3.60
   2  -2  -8  713.43   34.20
  -2   2  -8  776.42   34.70
  -2   2  -8  748.13   33.00
   2  -2   8  831.72   36.20
  -2   2   8  676.43   34.60
  -2   2   8  663.63   33.80
   2  -2   8  754.92   36.10
   2  -2   8  794.62   36.90
   2  -1  -8  152.38   13.30
   2  -1  -8  151.08   12.30
   2  -1   8  143.99   12.60
   2   0  -8  319.27   19.90
   2   0  -8  351.16   19.90
   2   0  -8  334.47   20.10
  -2   0   8  336.77   20.80
  -2   0   8  348.67   21.50
  -2   0   8  327.37   20.10
   2   1  -8  150.18   12.50
   2   1  -8  126.59   11.80
   2   1  -8  154.38   11.90
  -2  -1   8  142.49   12.90
  -2  -1   8  143.49   12.50
  -2  -1   8  172.08   13.70
  -2  -1   8  160.48   15.70
  -2  -1   8  179.88   14.40
   2   2  -8  736.13   34.70
   2   2  -8  780.92   33.70
  -2  -2   8  774.42   34.70
  -2  -2   8  733.63   35.20
  -2  -2   8  717.93   33.30
  -2  -2   8  793.72   36.90
  -2  -2   8  715.53   32.30
  -2  -2   8  781.22   37.10
  -2  -2   8  783.92   41.30
  -2  -2   8  752.82   36.80
   2   3  -8    5.10    4.40
   2   3  -8    1.30    3.00
   2   3  -8    9.60    4.10
  -2  -3   8    1.80    3.20
  -2  -3   8    4.80    4.40
  -2  -3   8    2.00    4.00
  -2  -3   8    7.70    4.50
  -2  -3   8    1.10    1.90
  -2  -3   8    1.20    2.90
  -2  -3   8    2.50    4.40
   2   4  -8  126.19   11.50
   2   4  -8  126.29   18.50
  -2  -4   8  113.49   16.90
  -2  -4   8  132.39   17.30
  -2  -4   8  120.69   12.40
  -2  -4   8  115.49   15.90
  -2  -4   8  130.89   10.20
  -2  -4   8  133.29   11.70
   2   5  -8    8.30    5.80
  -2  -5   8    9.20    5.60
  -2  -5   8    7.50    5.30
  -2  -5   8   12.30    5.60
  -2  -5   8   -0.10    3.50
  -2  -5   8    1.60    3.90
  -2  -5   8   19.00    6.40
  -2  -5   8    1.50    3.40
  -2  -5   8    5.20    4.90
   2   6  -8  725.13   39.30
  -2  -6   8  755.92   34.60
  -2  -6   8  818.92   38.40
  -2  -6   8  744.73   37.50
  -2  -6   8  744.53   36.60
  -2  -6   8  756.62   35.60
  -2  -6   8  798.72   42.10
  -2  -6   8  701.03   36.90
  -2  -7   8   15.40    5.20
  -2  -7   8    7.20    5.40
  -2  -7   8   27.10    7.20
  -2  -7   8   18.40    6.40
  -2  -7   8    9.50    5.40
  -2  -7   8   16.40    5.90
  -2  -7   8   16.60    6.40
  -2  -7   8   16.80    7.20
  -2  -8  -8  219.78   16.80
  -2  -8   8  243.78   16.40
  -2  -8   8  247.48   16.90
  -2  -8   8  224.38   16.50
  -2  -8   8  227.28   17.20
  -2  -8   8  236.08   15.90
  -2  -8   8  218.88   14.00
  -2  -9  -8   -1.30    3.90
   2   9   8    5.10    3.10
  -2  -9   8    5.20    2.90
  -2  -9   8    5.20    3.80
  -2  -9   8    1.70    2.70
  -2  -9   8    6.60    5.50
  -2  -9   8    6.60    4.30
  -2 -10  -8  212.58   12.50
  -2 -10  -8  214.58   15.80
   2  10   8  243.28   12.30
   2  -9  -9   16.40    4.90
   2  -9   9   18.30    5.10
  -2   9   9   20.90    3.80
   2  -8  -9   31.90    7.70
   2  -8   9   38.60    8.10
   2  -8   9   42.30    7.90
   2  -8   9   34.50    7.40
  -2   8   9   39.20    5.90
   2  -7  -9   26.20    7.30
   2  -7   9   20.20    5.50
   2  -7   9   17.70    5.80
   2  -7   9   18.40    6.30
   2  -7   9   11.60    5.90
  -2   7   9   25.10    5.20
   2  -7   9   16.00    5.50
   2  -6  -9   58.59   11.60
   2  -6   9   71.59   10.80
   2  -6   9   70.49   11.10
   2  -6   9   63.99    9.40
   2  -6   9   65.09   10.90
  -2   6   9   73.99    7.30
   2  -6   9   61.89    9.50
   2  -6   9   71.29   11.00
   2  -5  -9  147.39   12.10
   2  -5  -9  186.28   17.00
   2  -5  -9  162.58   19.30
   2  -5   9  159.18   13.90
   2  -5   9  140.39   16.40
   2  -5   9  153.48   13.90
  -2   5   9  136.49   10.10
   2  -5   9  138.99   13.80
   2  -5   9  129.89   12.40
   2  -5   9  144.29   12.40
   2  -5   9  134.79   11.20
   2  -4  -9  193.28   14.70
  -2   4  -9  182.58   12.00
  -2   4  -9  197.78   17.10
   2  -4  -9  187.78   17.70
  -2   4  -9  185.68   12.50
   2  -4   9  159.38   14.40
   2  -4   9  156.58   15.10
   2  -4   9  165.68   12.80
   2  -4   9  189.48   16.10
   2  -4   9  170.98   15.10
   2  -4   9  182.78   13.90
   2  -4   9  171.78   13.70
   2  -4   9  163.48   14.30
  -2   3  -9   42.60    7.30
   2  -3  -9   69.19   11.50
  -2   3  -9   50.79    7.90
  -2   3  -9   41.60   12.70
   2  -3   9   62.99    9.60
   2  -3   9   50.19    9.70
   2  -3   9   49.90    8.50
   2  -3   9   48.10    9.00
   2  -3   9   60.29   10.60
   2  -3   9   32.30    8.10
  -2   2   9  699.03   32.80
   2  -1  -9  226.88   17.10
   2  -1  -9  185.88   15.60
   2  -1  -9  222.58   17.20
  -2   1   9  225.98   18.50
   2  -1   9  192.88   15.50
   2  -1   9  230.38   17.80
  -2   1   9  246.28   16.50
   2   0  -9    0.10    3.60
   2   0  -9    3.20    3.60
   2   0  -9   -3.80    2.50
  -2   0   9    1.30    3.30
  -2   0   9    9.50    3.90
   2   0   9    8.10    4.40
  -2   0   9   -0.90    2.90
   2   1  -9  201.38   16.00
   2   1  -9  217.88   15.50
   2   1  -9  224.58   15.70
  -2  -1   9  221.08   17.20
  -2  -1   9  205.78   17.30
   2   2  -9  740.43   36.40
   2   2  -9  740.03   35.40
   2   2  -9  745.93   32.70
   2   2  -9  806.82   35.60
  -2  -2   9  765.62   34.00
  -2  -2   9  729.43   37.30
  -2  -2   9  738.93   36.80
  -2  -2   9  823.52   43.40
  -2  -2   9  806.92   38.30
  -2  -2   9  729.73   40.10
  -2  -2   9  817.02   35.90
   2   3  -9   52.79    7.90
   2   3  -9   71.39   10.00
   2   3  -9   62.79    9.90
   2   3  -9   71.09   14.30
  -2  -3   9   55.09   10.30
  -2  -3   9   67.59   13.60
  -2  -3   9   74.39   10.60
  -2  -3   9   47.80    9.50
  -2  -3   9   73.39   12.00
  -2  -3   9   77.09    9.50
  -2  -3   9   73.29   11.20
  -2  -3   9   72.59   11.70
   2   4  -9  166.78   14.20
   2   4  -9  180.88   12.50
  -2  -4   9  170.48   15.30
  -2  -4   9  187.48   18.20
  -2  -4   9  181.58   15.80
  -2  -4   9  195.28   14.60
  -2  -4   9  204.48   14.20
  -2  -4   9  174.28   14.90
  -2  -4   9  183.18   15.80
   2   5  -9  214.78   22.90
  -2  -5   9  167.28   14.80
  -2  -5   9  133.49   13.50
  -2  -5   9  154.58   13.10
  -2  -5   9  129.79   12.70
  -2  -5   9  143.29   12.60
  -2  -5   9  154.48   16.40
  -2  -5   9  134.89   13.70
  -2  -6   9   77.99   11.90
  -2  -6   9   73.69   11.20
  -2  -6   9   65.49    9.80
  -2  -6   9   75.99   11.40
  -2  -6   9   80.39   11.50
  -2  -6   9   69.19   12.30
  -2  -6   9   74.09   10.50
  -2  -6   9   53.19   11.00
  -2  -7   9   13.50    5.80
  -2  -7   9   30.90    7.20
  -2  -7   9   15.70    5.90
  -2  -7   9   16.80    5.90
  -2  -7   9   24.50    6.30
  -2  -7   9   27.10    7.00
  -2  -8  -9   36.20    7.80
  -2  -8   9   34.30    7.10
  -2  -8   9   37.00    6.60
  -2  -8   9   29.20    7.20
  -2  -8   9   36.50    7.40
   2   8   9   38.70    6.00
  -2  -9  -9   17.80    5.30
   2   9   9   21.40    3.90
  -2  -9   9   26.30    6.00
  -2  -9   9   12.90    4.60
  -2  -9   9   24.90    5.60
   2  -8 -10  140.39   11.80
   2  -8  10  152.38   10.90
   2  -8  10  138.19   11.20
   2  -7 -10   10.00    5.70
   2  -7  10   12.80    5.00
   2  -7  10   10.60    5.80
   2  -7  10   15.30    5.50
   2  -7  10   15.90    6.80
   2  -7  10   10.40    4.20
   2  -6 -10  162.58   14.70
   2  -6  10  155.48   12.90
   2  -6  10  164.98   12.10
   2  -6  10  159.58   13.00
   2  -6  10  162.78   13.90
   2  -6  10  153.18   12.30
   2  -5 -10    4.80    4.40
   2  -5 -10   15.10    6.10
  -2   5 -10   10.10    4.90
   2  -5  10   14.00    5.80
   2  -5  10   16.00    5.90
   2  -5  10    1.20    3.50
   2  -5  10    7.00    4.00
   2  -5  10    4.40    4.30
  -2   4 -10  198.18   14.90
  -2   4 -10  209.58   13.80
  -2   4 -10  201.28   14.80
   2  -4 -10  204.28   15.30
  -2   4 -10  220.68   13.90
   2  -4  10  238.38   17.80
   2  -4  10  195.58   14.30
   2  -4  10  242.88   15.40
   2  -4  10  232.28   16.60
  -2   3 -10  163.18   12.30
   2  -3 -10  133.19   13.00
  -2   3 -10  155.38   12.50
   2  -3  10  156.48   12.50
   2  -3  10  150.58   11.90
   2  -3  10  161.48   14.00
   2  -3  10  140.59   13.90
   2  -2 -10  784.92   40.60
   2  -2 -10  817.12   37.90
   2  -2 -10  760.92   38.90
  -2   2  10  811.12   39.60
  -2   2  10  848.12   40.80
   2  -1 -10   34.00    8.50
   2  -1 -10   44.70    9.60
  -2   1  10   30.90    7.10
   2  -1  10   37.50    9.20
   2  -1  10   17.00    5.70
  -2   1  10   21.10    7.10
  -2   1  10   24.20    7.30
   2   0 -10  871.21   42.40
   2   0 -10  895.61   40.60
   2   0 -10  870.21   41.10
  -2   0  10  851.21   40.90
  -2   0  10  914.91   43.00
  -2   0  10  918.21   42.50
   2   0  10  889.31   41.00
   2   1 -10   25.40    7.10
   2   1 -10   34.30    7.40
   2   1 -10   41.60    9.00
  -2  -1  10   32.60    7.40
  -2  -1  10   28.60    7.90
  -2  -1  10   35.40    8.70
  -2  -1  10   28.70    7.40
   2   2 -10  773.32   36.50
   2   2 -10  800.72   38.70
   2   2 -10  794.02   36.90
  -2  -2  10  809.92   35.40
  -2  -2  10  805.52   38.90
  -2  -2  10  826.72   39.80
  -2  -2  10  799.02   39.30
  -2  -2  10  780.92   36.70
   2   3 -10  164.48   14.90
   2   3 -10  149.99   12.30
   2   3 -10  160.88   15.90
   2   3 -10  139.29   12.60
  -2  -3  10  134.79   13.60
  -2  -3  10  165.18   11.70
  -2  -3  10  165.68   14.90
  -2  -3  10  182.38   14.20
  -2  -3  10  164.98   14.40
  -2  -3  10  166.78   13.40
   2   4 -10  210.08   13.80
   2   4 -10  229.38   13.60
  -2  -4  10  213.18   14.50
  -2  -4  10  208.18   16.70
  -2  -4  10  200.58   16.70
  -2  -4  10  189.78   14.60
  -2  -4  10  214.38   15.10
  -2  -4  10  192.28   15.90
  -2  -5  10   -1.10    3.40
  -2  -5  10    7.50    3.40
  -2  -5  10   -1.10    3.20
  -2  -5  10    8.70    5.20
  -2  -5  10    6.40    4.50
  -2  -5  10    0.90    3.80
  -2  -5  10    4.70    4.30
  -2  -6  10  166.98   13.90
  -2  -6  10  187.18   13.00
  -2  -6  10  164.18   13.20
  -2  -6  10  167.48   13.90
  -2  -6  10  174.88   14.20
  -2  -6  10  170.08   12.70
  -2  -7  10   10.60    4.60
  -2  -7  10   12.30    4.60
  -2  -7  10   13.80    5.40
  -2  -7  10   12.70    5.10
  -2  -7  10   21.10    5.60
  -2  -8  10  151.68    9.40
  -2  -8  10  170.28   11.30
  -2  -8  10  141.19   11.10
  -2  -8  10  121.99   10.50
   2  -7 -11   28.60    6.40
   2  -7  11   21.50    4.50
  -2   7  11   23.50    4.80
  -2   7  11   21.20    5.10
   2  -7  11   31.20    6.00
   2  -7  11   27.00    5.90
   2  -6 -11   26.20    6.70
   2  -6  11   36.00    6.80
   2  -6  11   23.80    6.00
   2  -6  11   22.70    5.50
   2  -6  11   28.70    5.70
  -2   6  11   33.80    7.00
   2  -5 -11   39.20    9.30
   2  -5 -11   44.00    6.90
  -2   5 -11   40.30    6.80
   2  -5  11   22.40    6.40
   2  -5  11   38.50    7.30
   2  -5  11   43.90    7.80
   2  -5  11   30.50    6.40
  -2   5  11   33.70    7.70
   2  -4 -11  248.88   15.30
  -2   4 -11  221.78   14.10
  -2   4 -11  232.98   19.00
  -2   4  11  238.88   16.40
  -2   4  11  217.58   16.70
   2  -4  11  230.28   16.80
   2  -4  11  240.18   14.90
   2  -4  11  223.78   15.60
   2  -3 -11    2.20    5.10
  -2   3 -11    3.00    4.10
   2  -3  11    6.00    4.30
  -2   3  11    0.00    3.30
   2  -3  11   -4.10    2.70
   2  -3  11    1.70    3.60
  -2   3  11    7.20    4.20
   2  -2 -11  422.46   23.40
  -2   2  11  404.36   24.20
  -2   2  11  395.76   24.50
   2  -1 -11   38.00    8.30
   2  -1  11   41.20    8.30
   2  -1  11   51.79   10.10
  -2   1  11   39.10    8.40
  -2   1  11   41.50    8.60
   2   0 -11    0.30    4.30
   2   0 -11    1.00    3.60
  -2   0  11    0.40    3.00
   2   0  11    4.40    3.80
  -2   0  11    2.50    3.60
  -2   0  11    0.80    4.60
  -2   0  11    2.90    2.90
   2   1 -11   55.99    9.70
  -2  -1  11   40.80    8.20
  -2  -1  11   46.30    8.70
  -2  -1  11   49.10    9.00
  -2  -1  11   38.70    8.40
  -2  -1  11   45.60    7.80
   2   2 -11  361.96   20.70
  -2  -2  11  351.46   20.10
  -2  -2  11  340.27   19.70
  -2  -2  11  364.06   22.50
  -2  -2  11  359.96   22.10
  -2  -2  11  379.26   19.20
  -2  -2  11  378.06   22.40
   2   3 -11    5.40    3.80
  -2  -3  11    6.00    4.20
  -2  -3  11    0.20    2.10
  -2  -3  11   -3.50    2.90
  -2  -3  11   -3.70    3.20
  -2  -3  11    0.60    3.80
  -2  -3  11   -1.00    3.10
   2   4 -11  303.47   20.70
   2   4 -11  259.87   26.10
  -2  -4  11  247.68   17.20
  -2  -4  11  235.28   17.10
  -2  -4  11  233.48   15.60
  -2  -4  11  220.88   15.10
  -2  -4  11  250.37   17.20
  -2  -5  11   27.70    6.60
  -2  -5  11   44.80    8.20
  -2  -5  11   44.50    8.10
  -2  -5  11   37.00    6.90
  -2  -5  11   31.80    7.40
  -2  -5  11   32.70    5.70
  -2  -6  11   28.10    6.20
  -2  -6  11   28.20    5.70
  -2  -6  11   16.50    5.20
  -2  -6  11   28.20    6.10
  -2  -6  11   16.10    4.60
  -2  -7  11   29.30    5.30
  -2  -7  11   20.40    4.60
  -2  -7  11   24.20    4.80
  -2  -7  11   17.10    4.40
  -2   5 -12    7.80    4.50
   2  -5 -12   19.20    6.00
   2  -5  12   -0.60    2.70
   2  -5  12    2.80    3.20
   2  -5  12    8.70    4.40
   2  -5  12    1.50    2.30
  -2   5  12    4.70    2.80
  -2   5  12   -2.40    2.40
  -2   4 -12   20.90    5.10
  -2   4 -12   23.60    5.30
   2  -4 -12   17.00    4.80
   2  -4  12    4.50    3.30
  -2   4  12    8.00    3.80
  -2   4  12    9.90    4.20
   2  -4  12    8.20    4.30
   2  -3 -12   21.30    5.70
  -2   3 -12   22.30    6.00
   2  -3  12   12.00    4.50
  -2   3  12   19.30    5.10
  -2   3  12   13.00    5.40
   2  -3  12   14.80    5.70
  -2   3  12   16.80    5.30
  -2   3  12   26.70    7.40
   2  -2 -12  420.76   21.70
  -2   2  12  378.46   20.10
  -2   2  12  396.26   22.40
  -2   2  12  384.66   21.60
   2  -1 -12  209.38   15.10
   2  -1  12  180.78   13.60
  -2   1  12  233.98   14.30
  -2   1  12  226.08   15.70
  -2   1  12  197.58   13.60
  -2   1  12  218.18   15.10
   2   0 -12  160.88   13.40
  -2   0  12  185.68   13.80
  -2   0  12  180.18   14.10
  -2   0  12  191.98   12.50
   2   0  12  156.38   12.10
   2   0  12  152.98   13.60
   2   1 -12  224.68   15.10
  -2  -1  12  215.78   13.10
  -2  -1  12  204.38   14.90
  -2  -1  12  213.48   15.50
   2   2 -12  399.46   21.10
   2   2 -12  422.66   22.20
  -2  -2  12  364.26   18.90
  -2  -2  12  368.56   21.60
  -2  -2  12  421.96   22.80
  -2  -2  12  394.56   18.70
   2   3 -12   26.80    5.80
  -2  -3  12   11.70    4.30
  -2  -3  12   28.50    5.50
  -2  -3  12   21.10    6.10
   2   4 -12   26.10    6.80
   2   4 -12   13.40    4.30
   2   4 -12   10.50    3.80
  -2  -4  12   12.30    4.80
  -2  -4  12    8.70    3.70
  -2  -4  12   16.40    4.50
  -2  -4  12    9.20    4.30
   2   5 -12   17.80    5.10
  -2  -5  12    1.10    3.20
  -2  -5  12    1.20    2.70
  -2  -5  12    4.10    2.50
  -2  -5  12    0.00    2.90
   2  -3 -13   -1.10    3.00
  -2   3 -13   10.20    4.10
   2  -3  13    4.20    3.10
   2  -3  13    6.60    2.30
  -2   3  13    2.20    2.70
  -2   3  13    4.20    2.20
  -2   3  13    6.20    3.10
   2  -2 -13  206.38   12.40
   2  -2  13  188.38   10.90
  -2   2  13  199.18   12.50
  -2   2  13  209.18   11.80
  -2   2  13  192.88   11.90
   2  -1 -13  148.59   11.00
  -2   1  13  157.48   10.20
  -2   1  13  163.58   11.30
   2  -1  13  157.08    9.70
  -2   1  13  139.69   10.30
   2   0 -13    0.90    3.50
  -2   0  13   -0.60    3.00
   2   0  13   -1.50    2.90
  -2   0  13   -0.90    2.50
   2   0  13    5.00    2.60
  -2   0  13   -0.20    3.10
   2   1 -13  172.88   11.10
  -2  -1  13  153.98   11.50
   2   1  13  147.79    9.10
  -2  -1  13  138.59   10.40
   2   2 -13  194.98   12.80
   2   2 -13  184.28   11.60
  -2  -2  13  189.68   12.50
   2   2  13  191.28   11.60
  -2  -2  13  169.98   11.70
   2   3 -13    7.80    3.10
  -2  -3  13    1.70    2.70
  -2  -3  13    6.50    2.90
  -2  -3  13    6.70    4.10
   3 -12   0    2.20    4.30
  -3  12   0    0.60    2.60
  -3  12   0    5.30    4.00
  -3  12   0    6.00    3.90
  -3  11   0  840.72   36.60
   3 -11   0  790.92   38.50
  -3  11   0  850.61   34.00
  -3  11   0  820.72   37.30
   3 -11   0  845.42   39.00
  -3  10   0    5.30    4.50
  -3  10   0    2.90    3.90
   3 -10   0    7.70    5.20
   3 -10   0    6.90    6.00
   3  -9   0   24.40    7.00
   3  -9   0   20.80    7.50
  -3   9   0   36.60    6.60
   3  -9   0   24.70    6.90
  -3   9   0   15.30    4.50
  -3   8   0    7.50    3.30
   3  -8   0    5.20    5.30
   3  -8   0    3.80    3.70
   3  -8   0    4.90    5.00
   3  -8   0    7.20    4.50
  -3   7   0  361.66   17.60
  -3   7   0  333.77   16.60
   3  -7   0  355.56   17.50
   3  -7   0  377.76   23.60
  -3   6   0    1.60    2.30
  -3   6   0    2.60    2.40
   3  -6   0    2.40    3.40
  -3   5   0  982.50   38.80
  -3   5   0 1022.10   38.90
   3  -5   0 1105.39   43.40
  -3   4   0    4.10    2.40
   3  -4   0    4.30    3.10
  -3   3   0 2875.21   99.99
   3  -2   0   20.40    3.00
   3  -1   0  181.88    8.20
   3   1   0  198.98    8.70
   3   1   0  198.18    8.50
   3   2   0   18.20    2.60
   3   2   0   19.20    2.60
  -3  -3   0 2992.10  112.39
  -3  -4   0  -14.00   12.00
  -3  -5   0  981.60   39.20
  -3  -6   0    9.80    4.50
  -3  -6   0    0.10    2.40
  -3  -6   0    4.00    3.40
   3   7   0  351.66   16.80
  -3  -7   0  354.16   19.70
  -3  -7   0  302.17   21.70
  -3  -7   0  344.07   23.80
  -3  -7   0  332.07   19.00
  -3  -8   0    1.40    3.60
  -3  -8   0    7.20    5.80
  -3  -8   0    5.30    4.30
   3   8   0    8.40    3.40
  -3  -8   0   12.10    5.50
  -3  -8   0    3.50    4.40
  -3  -8   0    6.70    6.30
  -3  -9   0   20.40    6.10
  -3  -9   0    8.50    5.10
  -3  -9   0   24.50    8.30
   3   9   0   20.40    4.70
  -3  -9   0   17.90    8.50
  -3 -10   0   -0.60    5.60
  -3 -10   0    5.40    6.00
  -3 -10   0    1.30    4.60
  -3 -11   0  845.42   42.10
  -3 -11   0  807.82   40.20
  -3 -12   0   -4.30    4.00
   3 -12  -1   12.90    5.50
  -3  12  -1   15.00    5.10
   3 -12  -1   13.50    5.80
  -3  12   1   14.80    5.60
  -3  12   1   11.90    4.30
   3 -12   1    5.80    4.80
  -3  12   1   10.40    3.60
   3 -11  -1   72.19   11.30
   3 -11  -1   56.09   10.20
  -3  11  -1   69.69   11.20
  -3  11   1   66.59    9.30
   3 -11   1   77.69   13.10
  -3  11   1   89.79    8.00
  -3  11   1   93.19   10.00
   3 -11   1   81.79   11.50
   3 -10  -1   11.80    6.00
  -3  10  -1   14.50    6.10
   3 -10  -1   11.90    6.50
   3 -10   1   10.50    5.80
  -3  10   1   14.30    5.00
  -3  10   1   10.40    5.30
   3 -10   1   13.10    6.00
  -3  10   1   15.30    5.00
  -3   9  -1  759.12   32.90
   3  -9  -1  800.02   37.40
   3  -9  -1  782.32   37.50
   3  -9   1  759.72   37.00
   3  -9   1  684.23   40.40
  -3   9   1  746.93   34.60
   3  -9   1  698.53   36.30
  -3   9   1  784.62   32.30
  -3   9   1  735.63   34.70
   3  -9   1  786.22   36.20
   3  -8  -1  294.37   19.40
   3  -8  -1  305.37   16.60
  -3   8  -1  303.57   15.90
  -3   8   1  333.07   17.90
   3  -8   1  314.67   19.50
   3  -8   1  266.17   19.00
   3  -8   1  300.07   18.80
  -3   8   1  290.97   15.50
   3  -8   1  338.17   23.60
  -3   8   1  285.07   16.90
  -3   8   1  239.58   17.70
   3  -7  -1   16.50    4.40
   3  -7  -1   28.40    8.10
  -3   7  -1   24.70    4.60
  -3   7   1   27.80    5.50
  -3   7   1   22.40    5.10
   3  -7   1   25.30    6.60
   3  -7   1   24.10    6.40
   3  -7   1   25.90    7.40
   3  -7   1   26.10    6.90
  -3   7   1   33.30    5.60
  -3   6  -1  536.75   22.70
   3  -6  -1  525.15   28.20
  -3   6   1  543.85   23.70
   3  -6   1  565.54   28.00
  -3   6   1  541.35   23.70
   3  -5  -1  419.46   21.60
  -3   5  -1  418.06   17.40
   3  -5   1  392.86   20.80
  -3   5   1  393.46   17.90
  -3   5   1  418.36   18.30
  -3   4  -1  146.89    7.70
   3  -4  -1  154.78   10.20
  -3   4   1  154.08    8.40
  -3   4   1  130.49    8.10
   3  -4   1  128.99    9.60
   3  -3  -1 2417.26   87.29
   3  -3   1 2564.74   89.09
   3  -2  -1 1992.00   70.29
   3  -2  -1 2027.10   69.59
  -3   2  -1 1955.40   69.79
   3   0  -1    3.30    1.70
   3   0  -1    5.60    1.90
  -3   0   1    1.50    1.40
  -3  -2   1 2161.68   80.59
   3   3   1 2894.11   99.09
   3   3   1 2792.32   99.49
   3   4   1  154.48    8.30
   3   4   1  157.28    8.50
   3   4   1  136.99    7.40
  -3  -4   1  141.09    9.00
  -3  -5  -1  339.87   18.80
  -3  -5   1  389.86   21.20
   3   5   1  423.76   17.40
   3   5   1  419.86   18.00
  -3  -5   1  407.16   18.90
   3   5   1  390.06   16.20
  -3  -6  -1  490.75   25.00
  -3  -6  -1  545.15   28.60
  -3  -6   1  497.95   24.00
  -3  -6   1  505.55   26.70
  -3  -6   1  530.55   24.40
   3   6   1  526.25   22.90
   3   6   1  537.25   22.50
  -3  -7  -1   24.10    6.50
  -3  -7  -1   29.60    7.10
  -3  -7  -1   19.80    5.80
  -3  -7  -1   27.70    7.60
  -3  -7  -1   32.20    5.30
  -3  -7   1   35.70    7.40
   3   7   1   21.00    4.40
  -3  -7   1   27.70    6.90
  -3  -7   1   24.40    7.60
  -3  -7   1   28.70    6.30
  -3  -7   1   23.20    7.00
  -3  -7   1   13.90    4.60
  -3  -7   1   20.80    6.10
   3   7   1   17.80    4.30
  -3  -7   1   24.20    6.40
  -3  -7   1   37.80    9.80
  -3  -8  -1  311.87   23.50
  -3  -8  -1  312.57   19.60
  -3  -8  -1  280.97   19.30
  -3  -8  -1  317.07   20.00
  -3  -8  -1  306.37   22.90
  -3  -8  -1  308.87   21.30
  -3  -8   1  299.97   18.70
  -3  -8   1  269.27   18.60
  -3  -8   1  302.47   18.70
   3   8   1  316.07   15.50
  -3  -8   1  318.77   19.90
  -3  -8   1  302.27   22.50
  -3  -8   1  321.27   22.60
  -3  -8   1  308.97   23.50
   3   8   1  302.97   17.50
  -3  -9  -1  691.53   36.10
  -3  -9  -1  761.82   41.70
  -3  -9  -1  719.33   35.70
  -3  -9  -1  776.92   39.30
   3   9   1  692.83   33.10
   3   9   1  733.23   30.90
  -3  -9   1  770.42   40.50
  -3  -9   1  779.92   35.90
  -3  -9   1  772.02   41.40
  -3 -10  -1   10.30    8.20
  -3 -10  -1    3.20    5.90
  -3 -10   1   15.40    8.00
  -3 -10   1   17.80    8.10
  -3 -10   1    7.50    5.50
   3  10   1    9.70    4.10
   3  10   1    8.70    5.20
   3  10   1    9.30    6.10
  -3 -11  -1   52.59   10.60
  -3 -11  -1   73.79   13.10
   3  11   1   82.79    7.70
  -3 -11   1   69.39   11.50
  -3 -11   1   81.69   13.60
  -3 -12  -1   11.00    6.30
  -3 -12   1    6.80    6.00
   3 -12  -2   15.10    5.40
  -3  12   2   14.50    3.90
  -3  12   2   11.40    4.60
   3 -12   2   12.20    5.10
   3 -11  -2  500.75   26.60
   3 -11  -2  481.35   26.70
   3 -11   2  454.15   31.80
  -3  11   2  483.95   24.90
  -3  11   2  494.95   25.30
  -3  11   2  506.75   24.50
   3 -11   2  482.65   26.00
   3 -10  -2  103.09   14.20
   3 -10  -2   97.99   13.20
  -3  10   2  110.79   10.50
  -3  10   2  102.39    9.40
   3 -10   2  123.49   14.50
  -3  10   2   79.39   10.90
   3 -10   2   88.19   13.10
  -3  10   2  111.39   11.50
   3  -9  -2  298.07   20.20
   3  -9  -2  309.27   17.30
   3  -9   2  319.07   24.20
   3  -9   2  313.47   20.40
  -3   9   2  305.07   19.40
   3  -9   2  311.17   21.00
   3  -9   2  296.57   19.60
  -3   9   2  283.97   18.50
  -3   9   2  272.97   18.70
  -3   9   2  305.57   16.40
   3  -8  -2   29.20    6.20
   3  -8  -2   41.40    8.80
  -3   8   2   37.90    6.60
  -3   8   2   26.60    6.20
   3  -8   2   31.70    7.60
   3  -8   2   34.90    8.30
   3  -8   2   29.70    8.60
   3  -8   2   22.20    7.10
  -3   8   2   23.50    5.60
   3  -8   2   35.20    8.00
  -3   8   2   15.20    4.80
   3  -7  -2  925.91   39.20
   3  -7  -2  910.31   40.90
  -3   7   2  910.21   37.80
   3  -7   2  924.51   41.90
   3  -7   2  863.01   42.50
  -3   7   2  953.80   36.60
   3  -7   2  857.11   41.10
   3  -7   2  866.91   39.60
   3  -7   2  907.91   42.00
  -3   7   2  926.71   38.60
   3  -6  -2   83.59    7.90
  -3   6   2   79.99    7.60
  -3   6   2   90.39    7.10
  -3   6   2  101.49    8.20
   3  -6   2   91.79   12.00
   3  -5  -2 3035.30  111.49
   3  -5  -2 3173.58  114.99
   3  -5   2 3108.19  114.49
  -3   5   2 3259.87  111.59
  -3   5   2 3056.79  110.89
   3  -4  -2   15.20    3.90
   3  -4  -2   16.40    4.80
   3  -4   2   13.60    4.20
  -3   4   2   20.60    4.10
  -3   4   2   16.60    3.50
   3  -3  -2 2417.56   86.19
   3  -3  -2 2395.36   85.19
   3  -3  -2 2381.76   84.89
   3  -2  -2 1534.45   56.49
   3  -2  -2 1642.94   57.29
  -3   2  -2 1573.04   55.99
   3  -2  -2 1618.14   57.09
  -3   2  -2 1606.44   57.09
   3  -2  -2 1590.44   57.39
  -3   2   2 1584.84   56.99
  -3   1  -2    6.40    2.70
   3  -1  -2    8.70    2.60
  -3   0   2 2620.54   90.69
   3   1  -2    5.40    1.80
  -3  -3   2 2635.34   91.59
  -3  -3   2 2534.75   91.39
  -3  -4   2   17.00    3.70
  -3  -5  -2 2755.22  103.59
  -3  -5   2 2933.11  102.19
  -3  -6  -2  113.99   10.10
  -3  -6   2   95.39    8.10
   3   6   2   95.99    8.30
  -3  -6   2  104.89    8.60
  -3  -7  -2  890.01   40.90
  -3  -7  -2  974.90   42.90
  -3  -7  -2  912.11   41.40
  -3  -7  -2  837.02   40.50
  -3  -7  -2  917.21   38.30
  -3  -7   2  943.61   46.40
  -3  -7   2  869.81   39.50
  -3  -7   2  891.01   38.70
   3   7   2  974.30   39.30
  -3  -7   2  941.61   40.80
  -3  -7   2  950.80   43.80
   3   7   2  900.21   38.10
   3   7   2  881.41   36.00
  -3  -7   2 1016.50   43.10
  -3  -7   2  946.61   44.10
  -3  -7   2  911.21   38.80
  -3  -7   2  846.02   41.20
  -3  -8  -2   25.40    6.60
  -3  -8  -2   21.60    6.60
  -3  -8  -2   23.40    8.50
  -3  -8  -2   30.20    7.90
  -3  -8  -2   27.90    5.50
  -3  -8   2   29.30    6.60
   3   8   2   19.70    6.00
  -3  -8   2   40.00   10.60
  -3  -8   2   38.60    9.20
  -3  -8   2   28.30    9.40
   3   8   2   25.70    6.20
  -3  -8   2   30.40    7.10
   3   8   2   24.70    5.20
  -3  -8   2   28.30    6.50
  -3  -8   2   33.30    8.60
   3   8   2   24.00    5.60
   3   8   2   27.40    7.30
  -3  -8   2   22.00    7.40
  -3  -8   2   31.00   10.00
  -3  -8   2   36.90    7.80
  -3  -9  -2  331.37   22.70
  -3  -9  -2  334.07   24.60
  -3  -9   2  263.07   18.90
   3   9   2  281.97   19.00
   3   9   2  325.17   16.60
   3   9   2  301.27   18.50
   3   9   2  301.77   18.40
  -3  -9   2  286.97   22.90
  -3  -9   2  314.57   23.70
  -3  -9   2  326.27   24.50
  -3 -10  -2   87.79   13.90
  -3 -10  -2   99.79   16.30
   3  10   2  117.69    9.30
   3  10   2  103.09    9.80
   3  10   2  101.19   10.60
  -3 -10   2   84.59   13.90
  -3 -10   2  109.09   16.40
  -3 -10   2   98.29   12.80
   3  10   2   97.89   10.20
  -3 -11  -2  478.85   29.00
  -3 -11  -2  473.05   28.80
  -3 -11   2  494.85   30.60
  -3 -11   2  511.35   29.80
   3  11   2  505.85   24.10
   3  11   2  499.25   24.80
  -3 -12  -2   13.20    6.10
  -3 -12  -2   21.30    6.30
   3  12   2   24.00    4.50
   3  12   2   17.80    4.70
  -3 -12   2   25.60    7.20
   3  12   2   18.40    5.20
   3 -12  -3   12.30    5.30
  -3  12   3   12.50    4.90
  -3  12   3   19.20    4.20
   3 -12   3   14.80    5.10
  -3  12   3   20.70    4.40
   3 -11  -3   51.19    9.80
   3 -11   3   39.10    8.60
  -3  11   3   59.69    8.00
  -3  11   3   49.50    7.50
  -3  11   3   43.30    8.50
   3 -10  -3   14.80    6.40
   3 -10  -3   12.00    3.90
   3 -10  -3   18.50    6.60
  -3  10   3   21.90    6.00
  -3  10   3   28.20    6.50
  -3  10   3   23.60    7.10
   3 -10   3   13.00    6.00
   3 -10   3   18.90    6.60
   3  -9  -3  183.08   13.50
   3  -9  -3  175.38   15.10
  -3   9   3  163.68   12.00
  -3   9   3  174.08   14.00
  -3   9   3  153.58   13.50
   3  -9   3  179.58   16.00
  -3   9   3  196.58   14.40
   3  -9   3  187.08   15.60
   3  -9   3  181.48   18.20
   3  -9   3  186.28   15.10
   3  -8  -3  249.38   16.50
   3  -8   3  263.87   22.00
   3  -8   3  233.68   20.00
   3  -8   3  238.18   17.60
  -3   8   3  233.68   14.20
   3  -8   3  263.37   19.00
  -3   8   3  240.28   15.90
  -3   8   3  263.57   17.50
  -3   8   3  233.58   16.20
   3  -7  -3  213.88   15.30
   3  -7  -3  200.18   14.80
   3  -7  -3  174.08   15.90
   3  -7   3  194.28   14.70
   3  -7   3  200.18   15.50
  -3   7   3  217.68   14.40
   3  -7   3  196.28   15.10
  -3   7   3  222.38   14.50
   3  -7   3  203.18   14.80
  -3   7   3  204.88   13.70
   3  -7   3  189.88   16.30
   3  -7   3  221.28   21.20
   3  -6  -3  389.56   21.90
   3  -6  -3  404.66   21.40
   3  -6   3  403.36   22.20
   3  -6   3  402.86   21.70
   3  -6   3  437.16   24.00
  -3   6   3  417.66   20.30
   3  -6   3  429.56   23.80
   3  -6   3  426.86   23.10
  -3   6   3  445.16   21.60
   3  -5  -3 1570.44   59.69
  -3   5   3 1587.44   59.39
   3  -5   3 1638.84   61.89
  -3   5   3 1458.65   57.19
   3  -4  -3  322.27   16.10
   3  -4  -3  334.47   16.00
   3  -4   3  328.87   17.50
  -3   4   3  334.17   16.20
   3  -3  -3 6851.81  235.08
  -3   2  -3   33.90    5.20
  -3   2  -3   36.50    3.40
   3  -2  -3   30.30    4.60
   3  -2  -3   23.40    4.10
   3  -2  -3   32.30    4.40
  -3   1   3   91.69    6.00
  -3   1   3   93.19    5.70
   3   1  -3   96.19    5.60
  -3  -2   3   30.70    8.00
  -3  -3   3 8842.21  304.77
  -3  -4   3  382.96   18.40
  -3  -5   3 1546.45   60.59
  -3  -5   3 1690.93   62.99
  -3  -5   3 1631.94   62.59
  -3  -6  -3  408.46   21.60
  -3  -6   3  365.36   23.60
   3   6   3  427.96   24.70
  -3  -6   3  451.55   22.40
  -3  -6   3  486.45   25.10
   3   6   3  411.86   20.20
  -3  -6   3  386.56   19.80
  -3  -6   3  408.96   20.00
  -3  -7  -3  207.18   16.00
  -3  -7  -3  199.18   13.90
  -3  -7  -3  173.98   17.30
  -3  -7   3  215.28   15.00
   3   7   3  176.58   13.70
  -3  -7   3  196.38   30.20
  -3  -7   3  196.68   15.20
  -3  -7   3  197.18   15.00
  -3  -7   3  229.08   14.50
   3   7   3  189.18   13.80
  -3  -7   3  190.48   12.90
  -3  -7   3  208.08   13.60
  -3  -7   3  219.48   16.40
  -3  -7   3  208.58   18.00
  -3  -7   3  203.78   17.40
  -3  -7   3  218.98   18.30
  -3  -7   3  218.58   14.50
  -3  -7   3  223.58   15.40
   3   7   3  195.98   13.20
  -3  -7   3  191.98   14.60
  -3  -8  -3  239.88   15.60
  -3  -8  -3  245.38   19.00
   3   8   3  210.18   15.20
  -3  -8   3  251.87   20.20
  -3  -8   3  255.87   18.60
   3   8   3  240.58   16.30
   3   8   3  261.17   17.10
  -3  -8   3  232.08   20.00
  -3  -8   3  234.98   20.40
  -3  -8   3  240.38   20.30
  -3  -8   3  243.88   17.50
   3   8   3  261.47   16.00
  -3  -8   3  224.88   15.90
  -3  -9  -3  196.78   19.70
  -3  -9  -3  188.78   12.40
  -3  -9  -3  154.68   15.90
  -3  -9   3  185.48   14.50
   3   9   3  154.28   11.80
  -3  -9   3  204.18   18.60
   3   9   3  164.48   13.70
   3   9   3  173.98   14.30
  -3  -9   3  190.88   15.50
  -3  -9   3  162.18   15.80
  -3  -9   3  191.18   18.50
   3   9   3  185.58   13.60
  -3  -9   3  204.68   18.90
  -3  -9   3  186.58   14.60
  -3 -10  -3   12.50    8.10
  -3 -10  -3   20.30    7.50
   3  10   3   27.40    6.10
  -3 -10   3   20.60    6.70
   3  10   3   15.70    5.80
   3  10   3   27.70    6.00
  -3 -10   3   22.40    8.10
  -3 -10   3   26.00    6.90
  -3 -11  -3   31.80    9.50
  -3 -11  -3   29.20    8.40
   3  11   3   34.20    6.10
  -3 -11   3   28.50    8.90
   3  11   3   35.80    6.30
   3  11   3   45.60    8.50
  -3 -12  -3   18.70    6.40
   3  12   3   23.20    4.30
   3  12   3   19.70    4.80
   3  12   3   16.80    4.10
   3 -12  -4  166.48   12.00
   3 -12   4  149.49   10.60
  -3  12   4  142.09   10.10
  -3  12   4  145.19    9.50
   3 -11  -4  276.17   18.60
   3 -11   4  297.07   18.10
   3 -11   4  287.57   19.60
  -3  11   4  293.77   15.60
  -3  11   4  279.77   17.20
   3 -10  -4    2.50    4.00
   3 -10  -4    3.40    4.10
   3 -10  -4    5.20    4.00
  -3  10   4    9.10    4.40
   3 -10   4    2.10    5.20
   3 -10   4   13.90    6.10
  -3  10   4    3.60    3.30
  -3  10   4    9.80    5.00
   3  -9  -4    4.00    3.90
   3  -9  -4    2.20    4.60
  -3   9   4   11.00    4.80
   3  -9   4    8.00    5.40
  -3   9   4    0.00    3.50
   3  -9   4   -1.50    3.80
  -3   9   4    8.50    4.50
  -3   9   4    2.40    5.00
   3  -9   4    6.80    5.50
   3  -9   4    7.10    4.50
   3  -8  -4    4.00    4.00
   3  -8  -4   12.90    6.00
   3  -8  -4    4.50    4.60
   3  -8   4    3.90    4.40
   3  -8   4    4.70    4.60
  -3   8   4    5.40    4.10
   3  -8   4    5.90    5.30
  -3   8   4    9.10    4.30
  -3   8   4    0.10    2.50
   3  -8   4    4.70    5.30
   3  -8   4    4.70    4.00
  -3   8   4    2.90    3.90
   3  -7  -4  580.94   29.50
   3  -7  -4  562.54   28.80
   3  -7  -4  533.25   28.10
   3  -7   4  544.75   25.90
   3  -7   4  519.75   27.70
   3  -7   4  576.94   29.90
  -3   7   4  543.05   28.20
  -3   7   4  556.74   25.10
   3  -7   4  601.44   30.80
  -3   7   4  572.34   27.00
   3  -7   4  548.75   31.20
   3  -7   4  540.95   28.20
   3  -7   4  561.74   35.70
   3  -7   4  553.94   29.00
  -3   7   4  542.45   27.90
   3  -6  -4   16.30    5.30
   3  -6   4   19.90    5.00
   3  -6   4   11.40    6.00
   3  -6   4   25.00    6.60
  -3   6   4   18.10    5.50
   3  -6   4   11.70    5.80
   3  -6   4   25.70    7.20
   3  -6   4   26.10    9.20
   3  -6   4   24.20    6.40
  -3   6   4   19.20    5.30
  -3   6   4   27.00    6.20
   3  -5  -4  934.71   36.10
   3  -5  -4  926.31   39.50
  -3   5   4  949.90   39.50
   3  -5   4  906.21   40.60
  -3   5   4  933.51   38.10
   3  -4  -4   85.59    8.10
  -3   4  -4   80.99    7.50
   3  -4  -4   97.29    7.80
   3  -4  -4   88.49    7.50
  -3   4   4  101.59    8.20
   3  -4   4   87.29    8.60
   3  -3  -4  150.48    9.80
  -3   3  -4  129.89    9.40
   3  -3  -4  145.59    8.50
  -3   3  -4  135.19    7.60
   3  -3   4  137.39   10.00
  -3   2  -4  570.64   24.80
  -3   2  -4  574.44   22.30
  -3   2   4  530.45   21.90
  -3   1  -4 2628.24   90.29
   3  -1  -4 2704.33   92.79
  -3   1   4 2428.16   91.49
   3   0  -4  809.52   32.20
  -3  -2   4  591.84   24.70
  -3  -3   4  151.78    8.60
  -3  -3   4  167.38    9.30
  -3  -4   4   95.99    7.80
  -3  -4   4   93.09    7.30
  -3  -5   4  890.91   37.70
  -3  -5   4  878.21   37.80
  -3  -5   4 1016.50   39.30
  -3  -5   4  917.01   37.10
  -3  -6  -4   26.40    6.50
  -3  -6   4   19.50    7.00
  -3  -6   4   23.80    5.20
  -3  -6   4   24.60    6.10
  -3  -6   4   15.40    4.60
  -3  -6   4   16.00    7.10
  -3  -6   4   19.80    8.70
  -3  -6   4   24.60    5.20
  -3  -6   4   13.30    5.40
  -3  -7  -4  548.85   28.20
  -3  -7   4  578.94   29.20
  -3  -7   4  521.55   26.80
   3   7   4  536.05   27.30
  -3  -7   4  546.25   26.20
  -3  -7   4  613.04   34.60
  -3  -7   4  551.84   26.20
   3   7   4  565.04   28.30
  -3  -7   4  599.94   29.10
  -3  -7   4  495.65   31.70
  -3  -7   4  569.44   28.50
  -3  -7   4  564.24   31.80
  -3  -7   4  601.74   33.30
  -3  -7   4  560.74   29.20
  -3  -7   4  577.04   30.10
  -3  -8  -4    1.90    5.00
  -3  -8  -4    9.60    4.30
  -3  -8   4   10.00    4.90
  -3  -8   4    6.40    4.10
  -3  -8   4    2.70    4.90
  -3  -8   4    4.70    4.50
  -3  -8   4    9.10    7.50
  -3  -8   4    1.70    4.00
  -3  -8   4   13.40    7.90
  -3  -8   4    4.60    3.90
   3   8   4    0.80    3.10
  -3  -8   4    0.50    4.20
   3   8   4    5.10    3.60
  -3  -9  -4    2.00    4.60
  -3  -9  -4    2.80    3.60
  -3  -9   4   10.80    5.10
  -3  -9   4   10.60    5.80
  -3  -9   4    3.30    4.50
   3   9   4    5.80    3.50
  -3  -9   4    6.30    4.60
  -3  -9   4   11.00    5.60
  -3  -9   4   -1.10    3.90
   3   9   4   11.10    5.00
  -3  -9   4    9.00    4.50
   3   9   4    7.80    4.30
  -3  -9   4    2.90    4.10
  -3  -9   4   10.10    7.00
  -3 -10  -4   14.60    7.10
  -3 -10  -4   11.70    6.80
   3  10   4    8.40    3.70
   3  10   4    6.60    4.10
  -3 -10   4   11.50    4.50
  -3 -10   4    5.10    6.60
  -3 -10   4    7.40    5.40
  -3 -11  -4  275.07   19.80
   3  11   4  275.97   15.80
  -3 -11   4  272.17   18.30
   3  11   4  310.17   15.70
  -3 -12  -4  142.39   12.00
  -3 -12  -4  140.59   11.00
   3  12   4  130.69    8.70
   3  12   4  140.39    9.80
   3 -11  -5  295.67   18.40
  -3  11   5  297.77   16.70
  -3  11   5  265.77   15.60
   3 -11   5  262.37   21.50
   3 -11   5  324.77   17.70
   3 -11   5  285.07   16.80
   3 -10  -5   10.90    4.00
   3 -10  -5   11.40    5.80
  -3  10   5   15.90    5.00
   3 -10   5   17.30    6.30
  -3  10   5   20.30    5.40
   3 -10   5   10.50    5.60
   3 -10   5   15.40    6.10
   3  -9  -5  233.38   15.90
   3  -9   5  185.58   19.20
   3  -9   5  190.38   16.70
  -3   9   5  193.48   13.10
   3  -9   5  235.28   16.60
  -3   9   5  181.18   15.70
   3  -9   5  221.68   16.70
   3  -8  -5  245.48   17.50
   3  -8  -5  199.58   17.20
   3  -8   5  220.68   17.60
  -3   8   5  222.98   15.70
   3  -8   5  207.88   18.70
   3  -8   5  249.48   17.70
   3  -8   5  207.68   16.80
  -3   8   5  217.88   16.80
  -3   8   5  228.38   14.20
   3  -8   5  208.18   16.10
   3  -7  -5   58.89   10.20
   3  -7  -5   59.09   11.80
   3  -7   5   51.89   11.40
  -3   7   5   58.29    9.80
   3  -7   5   32.10    9.40
  -3   7   5   74.59    9.20
   3  -7   5   73.29   15.60
   3  -7   5   72.79   12.40
   3  -7   5   57.39    8.70
   3  -7   5   63.19   18.30
   3  -6  -5    7.10    4.40
   3  -6  -5   10.80    5.50
   3  -6   5    6.50    5.20
   3  -6   5    8.20    4.60
  -3   6   5    2.90    3.00
  -3   6   5    2.60    3.40
   3  -6   5    8.10    4.40
   3  -6   5    3.80    4.60
   3  -6   5    2.80    3.40
   3  -6   5    6.70    4.20
   3  -6   5   13.40    5.50
   3  -5  -5   25.40    6.50
   3  -5  -5   13.70    4.10
   3  -5  -5   15.60    4.20
   3  -5  -5   17.40    5.60
  -3   5  -5   28.90    5.80
   3  -5   5   15.80    5.00
   3  -5   5   28.80    7.30
   3  -5   5   23.20    5.80
  -3   5   5   21.70    5.40
   3  -5   5   16.60    5.50
  -3   5   5   12.80    4.20
   3  -5   5   21.60    6.60
   3  -5   5   36.40    7.90
   3  -5   5   22.10    5.30
  -3   4  -5  150.48   11.10
   3  -4  -5  142.79   11.30
   3  -4  -5  139.09   10.50
   3  -4  -5  143.49   10.90
  -3   4   5  141.79   10.70
   3  -4   5  145.49   11.50
  -3   3  -5 2572.04   93.89
   3  -3  -5 2620.74   93.79
  -3   3  -5 2593.44   90.19
   3  -3  -5 2374.76   90.39
   3  -3   5 2529.35   93.49
  -3   2  -5    1.20    2.00
   3  -2  -5    1.90    2.80
   3  -2  -5    1.50    2.90
   3  -1  -5 1909.71   68.89
  -3   1   5 1786.92   67.19
   3   0  -5    4.10    2.70
   3   0  -5   -0.40    2.40
   3   1  -5 2028.90   75.29
   3   1  -5 2101.59   77.29
   3   1  -5 2181.88   76.19
   3   2  -5    0.30    2.10
   3   2  -5    0.10    2.40
  -3  -2   5    4.40    2.60
   3   3  -5 2943.71  101.69
  -3  -3   5 2663.53  100.09
   3   4  -5  156.18   10.50
  -3  -4   5  147.59    9.80
  -3  -4   5  157.68   10.50
   3   5  -5   13.70    4.00
  -3  -5   5   15.70    4.60
  -3  -5   5   18.90    6.80
  -3  -5   5   26.30    6.80
  -3  -5   5   18.70    4.80
  -3  -5   5   20.50    5.60
  -3  -5   5   27.70    8.70
  -3  -5   5   24.90    4.90
  -3  -5   5   20.10    5.70
  -3  -5   5   25.70    4.90
  -3  -5   5   18.40    5.30
  -3  -5   5   14.10    4.30
   3   6  -5    6.00    3.40
  -3  -6   5    4.00    3.00
  -3  -6   5    2.90    4.10
  -3  -6   5    6.20    3.10
  -3  -6   5    6.40    4.20
  -3  -6   5   11.70    4.50
  -3  -6   5    7.40    4.50
  -3  -6   5   12.10    5.60
  -3  -6   5    7.80    4.40
  -3  -6   5    7.90    3.00
  -3  -6   5   11.80    6.70
  -3  -6   5    7.80    3.60
  -3  -6   5    1.10    5.40
  -3  -6   5    5.20    4.30
   3   7  -5   70.49   11.60
   3   7  -5   52.29    8.00
  -3  -7   5   69.59   13.50
  -3  -7   5   60.49   12.10
  -3  -7   5   48.70    8.20
  -3  -7   5   84.79   11.50
  -3  -7   5   73.09   13.00
  -3  -7   5   41.70   10.70
  -3  -7   5   57.79   11.70
  -3  -7   5   53.79    8.30
  -3  -8  -5  190.78   16.90
  -3  -8  -5  218.58   16.20
  -3  -8   5  213.28   16.70
  -3  -8   5  194.78   18.30
  -3  -8   5  230.38   17.90
  -3  -8   5  209.08   19.20
  -3  -8   5  225.18   19.10
   3   8   5  194.48   14.60
  -3  -8   5  231.18   19.50
  -3  -8   5  240.08   17.10
   3   8   5  199.18   16.10
  -3  -8   5  218.08   15.80
  -3  -8   5  241.88   15.30
   3   8   5  208.38   14.90
  -3  -8   5  240.08   17.00
  -3  -8   5  225.18   14.00
  -3  -9  -5  219.88   15.30
  -3  -9  -5  203.48   17.10
  -3  -9   5  225.58   17.70
  -3  -9   5  233.78   16.80
  -3  -9   5  235.98   19.20
  -3  -9   5  221.48   18.90
  -3  -9   5  245.48   18.20
  -3  -9   5  211.98   16.60
  -3  -9   5  218.08   14.70
  -3  -9   5  236.28   17.00
   3   9   5  194.58   14.40
  -3  -9   5  182.48   17.30
   3   9   5  226.18   17.20
  -3 -10  -5   11.80    4.50
  -3 -10  -5    7.50    6.30
   3  10   5    6.40    3.80
  -3 -10   5   18.80    7.00
  -3 -10   5   -1.20    5.50
  -3 -11  -5  297.37   20.40
  -3 -11  -5  357.86   20.50
   3  11   5  297.37   15.50
   3  11   5  291.47   15.90
   3  11   5  270.37   16.30
   3 -11  -6  365.86   19.60
   3 -11   6  336.07   17.30
   3 -11   6  337.47   22.20
   3 -11   6  343.67   18.30
  -3  11   6  359.76   17.20
  -3  11   6  343.47   16.90
   3 -10  -6   -4.00    2.60
   3 -10  -6    0.80    3.90
   3 -10   6   -2.10    3.00
  -3  10   6    9.20    4.00
   3 -10   6   -1.30    4.10
  -3  10   6    0.00    2.70
   3 -10   6   -0.50    3.50
   3  -9  -6   71.49   11.00
  -3   9   6   64.09    9.20
   3  -9   6   59.69   10.00
   3  -9   6   67.79   11.60
   3  -9   6   81.39   11.50
   3  -9   6   47.20    9.60
   3  -8  -6   -3.10    3.40
  -3   8   6   10.10    4.70
   3  -8   6    2.60    4.50
   3  -8   6    2.30    3.30
   3  -8   6   -5.90    4.10
  -3   8   6    3.50    4.20
  -3   8   6   11.90    6.70
   3  -8   6    4.30    5.40
   3  -8   6    2.30    3.80
   3  -7  -6 1316.47   59.79
   3  -7  -6 1321.47   59.39
  -3   7   6 1411.46   56.59
  -3   7   6 1337.17   53.29
   3  -7   6 1353.16   57.59
   3  -7   6 1373.76   56.49
   3  -7   6 1417.56   58.59
   3  -7   6 1451.65   60.19
   3  -7   6 1369.96   57.29
   3  -7   6 1368.46   54.49
  -3   7   6 1267.57   62.69
   3  -7   6 1316.27   60.69
   3  -6  -6   28.80    5.40
   3  -6  -6   21.60    6.50
   3  -6  -6   31.50    8.30
   3  -6   6   37.30    8.40
  -3   6   6   22.50    6.40
   3  -6   6   23.40    6.00
  -3   6   6   19.80    5.40
   3  -6   6   34.50    7.80
   3  -6   6   25.20    7.20
   3  -6   6   21.40    7.50
  -3   6   6   26.50    6.30
   3  -6   6   27.40    7.10
   3  -6   6   27.10    6.50
   3  -6   6   34.50    8.10
   3  -5  -6  212.38   15.00
   3  -5  -6  253.47   17.50
   3  -5  -6  219.28   17.50
  -3   5  -6  269.07   16.20
   3  -5  -6  241.68   14.70
  -3   5   6  234.18   15.20
   3  -5   6  243.98   15.60
  -3   5   6  206.98   15.30
   3  -5   6  254.97   15.50
   3  -5   6  250.77   16.60
   3  -5   6  247.08   16.50
   3  -5   6  223.68   15.80
   3  -5   6  218.18   15.90
   3  -5   6  249.78   17.40
   3  -5   6  276.37   18.20
  -3   4  -6   77.89    7.00
   3  -4  -6  103.89   13.10
  -3   4  -6   89.59    9.70
   3  -4  -6   93.09    8.90
   3  -4  -6  103.49   16.50
   3  -4  -6   87.89    9.40
   3  -4   6   99.39   12.40
  -3   4   6  133.99   18.00
   3  -4   6   98.69    9.20
   3  -4   6   92.69   11.90
   3  -4   6   78.89   11.00
   3  -4   6   73.99   10.20
   3  -4   6  104.09   12.80
   3  -3  -6  334.87   19.10
   3  -3  -6  292.27   17.60
   3  -3   6  309.67   17.90
  -3   2  -6  167.68   12.70
  -3   2  -6  148.49    9.60
  -3   2  -6  131.19    8.50
   3   0  -6 1056.39   46.10
   3   0  -6 1069.19   43.40
   3   1  -6 1094.59   44.40
   3   1  -6 1239.68   45.80
   3   1  -6 1185.88   47.20
   3   2  -6  153.68    9.50
   3   2  -6  160.58   10.90
   3   2  -6  138.49    8.80
  -3  -2   6  146.79    9.90
   3   3  -6  336.47   17.70
  -3  -3   6  299.67   15.90
   3   4  -6  109.69    9.50
  -3  -4   6   87.09   12.40
  -3  -4   6  116.09   14.80
  -3  -4   6   93.29    8.60
  -3  -4   6  111.89   10.60
  -3  -4   6  109.99   13.50
  -3  -4   6  103.49   15.70
  -3  -4   6  112.89   13.30
   3   5  -6  233.18   14.80
  -3  -5   6  217.08   16.20
  -3  -5   6  255.67   17.30
  -3  -5   6  248.78   20.40
  -3  -5   6  242.78   14.20
  -3  -5   6  264.87   17.60
  -3  -5   6  232.28   15.50
  -3  -5   6  249.78   20.70
  -3  -5   6  219.58   13.20
  -3  -5   6  241.98   17.50
  -3  -5   6  247.68   20.00
  -3  -5   6  243.48   15.70
   3   6  -6   33.40    8.50
   3   6  -6   18.50    5.70
  -3  -6   6   40.60    9.70
  -3  -6   6   17.70    7.30
  -3  -6   6   29.60    7.30
  -3  -6   6   24.60    6.70
  -3  -6   6   44.40    8.70
  -3  -6   6   31.50    5.80
  -3  -6   6   29.10    8.80
  -3  -6   6   32.20    7.30
  -3  -6   6   15.60    5.50
  -3  -6   6   20.00    6.40
  -3  -6   6   25.40    7.50
   3   7  -6 1370.46   61.39
  -3  -7   6 1276.97   61.49
  -3  -7   6 1451.45   59.49
  -3  -7   6 1480.25   60.69
  -3  -7   6 1307.27   55.39
  -3  -7   6 1465.85   61.09
  -3  -7   6 1260.17   60.39
  -3  -7   6 1402.16   63.19
  -3  -7   6 1496.35   58.69
  -3  -7   6 1470.35   60.29
  -3  -7   6 1488.35   65.69
  -3  -8  -6    4.70    4.50
  -3  -8   6    7.70    3.40
  -3  -8   6   10.70    6.30
  -3  -8   6    4.50    3.90
  -3  -8   6    4.90    5.30
  -3  -8   6    3.80    5.20
  -3  -8   6   10.50    5.40
  -3  -8   6   15.20    5.90
  -3  -8   6    0.60    3.90
   3   8   6    5.20    3.80
  -3  -8   6    0.00    3.20
  -3  -8   6    3.20    4.90
   3   8   6    2.10    3.40
  -3  -9  -6   55.89    9.00
  -3  -9  -6   69.09   11.00
  -3  -9   6   72.89   11.20
  -3  -9   6   79.49   11.70
  -3  -9   6   51.49    9.00
  -3  -9   6   67.89   10.70
  -3  -9   6   70.79    9.00
  -3  -9   6   49.90    9.80
   3   9   6   69.09    7.90
   3   9   6   71.19    9.60
  -3 -10  -6    5.40    6.50
  -3 -10  -6    0.80    4.40
  -3 -10  -6   -2.10    3.10
   3  10   6   -3.70    1.70
  -3 -11  -6  351.66   19.80
  -3 -11  -6  317.67   20.40
   3  11   6  347.47   16.90
   3 -10  -7   67.49    8.40
   3 -10  -7   57.39    9.00
  -3  10   7   74.89    7.60
   3 -10   7   69.69    9.50
   3 -10   7   75.09    8.70
   3 -10   7   71.09    9.70
  -3  10   7   56.59    7.20
   3  -9  -7  469.65   24.90
   3  -9   7  446.86   25.10
   3  -9   7  442.76   23.10
  -3   9   7  450.05   22.80
   3  -9   7  440.66   24.40
   3  -9   7  433.76   25.40
   3  -8  -7   10.50    5.60
   3  -8   7   20.00    6.70
   3  -8   7   19.60    6.70
   3  -8   7   15.30    6.50
   3  -8   7   16.70    5.60
  -3   8   7   17.30    7.30
  -3   8   7   18.20    5.50
   3  -7  -7  656.93   33.90
   3  -7  -7  570.34   33.40
   3  -7   7  588.14   31.10
  -3   7   7  600.84   29.20
   3  -7   7  592.84   28.30
   3  -7   7  536.35   32.80
   3  -7   7  614.84   31.00
   3  -7   7  607.74   29.70
   3  -7   7  582.34   30.50
   3  -7   7  617.34   32.70
   3  -6  -7    6.00    3.70
   3  -6  -7    7.00    4.90
   3  -6  -7    5.80    4.40
   3  -6   7    6.60    5.10
  -3   6   7    8.30    4.30
   3  -6   7   13.10    5.50
   3  -6   7    4.40    4.40
   3  -6   7   14.60    6.30
   3  -6   7    6.80    5.80
   3  -6   7   13.00    5.30
   3  -6   7    7.30    4.80
   3  -5  -7  156.98   11.90
   3  -5  -7  146.29   14.20
   3  -5  -7  147.39   14.60
  -3   5  -7  167.68   13.70
   3  -5   7  139.99   13.20
   3  -5   7  166.88   14.60
   3  -5   7  160.68   13.40
   3  -5   7  143.29   13.20
   3  -5   7  144.19   13.00
   3  -5   7  137.39   12.10
   3  -5   7  139.39   12.60
  -3   5   7  124.19   11.10
   3  -5   7  140.89   11.90
  -3   4  -7  219.48   16.70
   3  -4  -7  222.18   15.70
  -3   4  -7  239.08   13.50
   3  -4  -7  228.48   15.30
   3  -4  -7  231.18   18.40
   3  -4   7  215.48   14.60
  -3   4   7  230.78   13.90
  -3   4   7  270.97   15.10
   3  -4   7  204.18   15.00
   3  -4   7  226.28   13.80
   3  -4   7  232.48   16.00
   3  -4   7  235.28   15.30
   3  -4   7  248.88   17.50
   3  -4   7  234.08   16.60
   3  -4   7  245.38   16.60
   3  -4   7  229.18   16.40
   3  -3  -7  595.04   27.60
   3  -3  -7  653.13   31.50
   3  -3  -7  606.94   29.90
   3  -3  -7  670.53   31.20
   3  -3   7  687.13   32.60
   3  -3   7  653.83   31.60
   3  -3   7  662.53   34.70
  -3   3   7  583.64   27.70
   3  -2  -7  108.99   12.60
   3  -2  -7  102.29    9.90
   3  -2  -7  109.19   10.00
   3  -2   7  107.19   17.90
   3   0  -7    2.10    3.20
   3   0  -7    4.20    3.80
  -3   0   7    4.70    3.90
   3   1  -7    9.40    4.20
   3   1  -7   18.80    5.20
  -3  -1   7   12.40    4.80
  -3  -1   7   19.20    5.20
  -3  -1   7   18.20    5.50
  -3  -1   7   19.40    6.70
   3   2  -7  111.09   10.10
   3   2  -7   96.39    8.70
  -3  -2   7  149.39   14.30
  -3  -2   7  122.09   10.90
  -3  -2   7  108.99   11.10
  -3  -2   7  129.39   20.60
  -3  -2   7  115.39    9.20
  -3  -2   7  117.39   11.40
  -3  -2   7  126.19   12.60
   3   3  -7  671.73   35.10
   3   3  -7  640.34   30.80
  -3  -3   7  688.13   33.30
  -3  -3   7  672.33   32.60
  -3  -3   7  651.03   28.90
  -3  -3   7  691.03   37.60
  -3  -3   7  655.73   33.20
  -3  -3   7  641.74   35.60
  -3  -3   7  674.13   32.40
  -3  -3   7  699.93   31.70
  -3  -3   7  660.23   29.70
   3   4  -7  247.08   15.80
   3   4  -7  246.88   19.30
  -3  -4   7  253.97   20.90
  -3  -4   7  267.47   16.10
  -3  -4   7  254.27   18.10
  -3  -4   7  246.38   17.30
  -3  -4   7  226.78   13.80
  -3  -4   7  273.57   20.90
  -3  -4   7  258.47   17.70
  -3  -4   7  243.08   14.80
  -3  -4   7  255.77   17.50
  -3  -4   7  271.97   17.00
   3   5  -7  144.69   14.90
   3   5  -7  170.08   13.00
  -3  -5   7  179.58   15.10
  -3  -5   7  172.38   13.60
  -3  -5   7  177.48   17.40
  -3  -5   7  167.08   14.50
  -3  -5   7  160.08   11.60
  -3  -5   7  166.48   14.90
  -3  -5   7  180.48   14.00
  -3  -5   7  200.28   15.30
  -3  -5   7  185.98   17.70
   3   6  -7   18.00    7.00
  -3  -6   7    8.00    6.30
  -3  -6   7    4.60    4.10
  -3  -6   7    0.10    2.50
  -3  -6   7    9.10    5.20
  -3  -6   7   15.30    4.60
  -3  -6   7    6.80    5.60
  -3  -6   7    2.20    3.20
  -3  -6   7   11.70    5.50
  -3  -6   7   13.10    5.80
  -3  -6   7    7.10    5.50
  -3  -6   7   15.80    6.70
  -3  -6   7   11.50    5.80
  -3  -7   7  573.44   30.80
  -3  -7   7  595.64   32.20
  -3  -7   7  635.74   32.20
  -3  -7   7  646.54   29.30
  -3  -7   7  645.24   36.40
  -3  -7   7  603.14   30.40
  -3  -7   7  548.05   33.60
  -3  -7   7  609.24   32.50
  -3  -8  -7   22.40    6.50
  -3  -8   7    9.90    5.40
  -3  -8   7   32.50    9.10
  -3  -8   7   13.30    4.80
  -3  -8   7   16.60    5.00
  -3  -8   7   27.70    7.70
  -3  -8   7   16.10    6.00
  -3  -8   7   10.80    5.60
  -3  -8   7   17.90    6.10
  -3  -9  -7  426.96   22.90
  -3  -9   7  413.46   23.10
  -3  -9   7  434.96   23.20
  -3  -9   7  386.16   23.50
  -3  -9   7  430.36   19.70
  -3  -9   7  416.96   23.70
  -3  -9   7  420.96   21.10
  -3  -9   7  427.66   23.70
  -3 -10  -7   62.99   10.90
  -3 -10  -7   60.49    7.50
   3  10   7   61.49    7.50
   3 -10  -8   15.60    4.90
   3 -10  -8   23.00    4.70
   3 -10   8    9.60    4.60
  -3  10   8   14.40    3.40
   3 -10   8   14.90    4.40
   3  -9  -8   10.70    4.70
   3  -9   8   13.80    5.70
  -3   9   8   18.80    4.60
   3  -9   8   16.40    5.90
   3  -9   8   32.50    6.10
   3  -8  -8    5.10    4.50
   3  -8   8   13.10    5.80
   3  -8   8   23.30    7.30
  -3   8   8   16.50    5.40
  -3   8   8   13.10    4.30
   3  -8   8   20.30    5.80
   3  -8   8   14.10    5.60
  -3   8   8   18.70    7.80
   3  -7  -8  568.04   30.90
   3  -7   8  534.75   28.20
   3  -7   8  545.75   29.90
   3  -7   8  509.85   28.00
   3  -7   8  543.05   26.50
  -3   7   8  546.75   26.20
   3  -7   8  518.95   26.00
   3  -7   8  512.35   28.00
   3  -6  -8  170.38   19.70
   3  -6  -8  161.58   11.10
   3  -6  -8  159.98   18.20
   3  -6   8  147.19   12.50
   3  -6   8  145.19   13.50
   3  -6   8  154.78   14.70
   3  -6   8  152.98   13.40
   3  -6   8  153.98   12.80
   3  -6   8  164.28   14.70
  -3   6   8  166.08   12.20
   3  -6   8  118.49   16.50
  -3   6   8  164.88   12.70
   3  -5  -8  689.73   37.50
  -3   5  -8  682.13   35.20
   3  -5  -8  643.54   31.40
   3  -5  -8  657.63   36.80
   3  -5   8  765.82   36.40
   3  -5   8  709.23   34.20
   3  -5   8  711.33   35.70
   3  -5   8  670.63   31.50
  -3   5   8  675.83   30.90
   3  -5   8  656.63   32.70
   3  -5   8  660.83   31.80
  -3   4  -8 1166.28   46.70
   3  -4  -8 1156.08   49.40
   3  -4  -8 1130.59   59.09
  -3   4  -8 1181.28   45.80
  -3   4  -8 1131.89   51.89
   3  -4  -8 1087.29   53.99
   3  -4   8 1260.57   52.09
   3  -4   8 1175.18   52.69
   3  -4   8 1172.28   48.90
   3  -4   8 1140.59   50.89
  -3   4   8 1154.38   51.69
   3  -4   8 1093.39   49.80
   3  -4   8 1239.48   49.10
   3  -4   8 1148.19   53.39
   3  -4   8 1256.87   52.99
   3  -3  -8  145.89   12.10
   3  -3  -8  144.49   12.80
   3  -3  -8  132.19   13.20
   3  -3   8  120.59   11.70
  -3   3   8  135.89    9.20
   3  -3   8  109.49   13.90
   3  -1   8  524.65   27.10
   3   0  -8   10.40    4.20
   3   0  -8    5.10    4.50
   3   0  -8    8.40    4.60
  -3   0   8    6.40    3.60
  -3   0   8   16.30    7.00
  -3   0   8   11.10    4.50
  -3   0   8    9.40    4.20
  -3   0   8   15.20    5.30
   3   1  -8  470.75   25.90
   3   1  -8  528.85   27.20
   3   1  -8  520.45   25.90
  -3  -1   8  510.35   27.10
  -3  -1   8  492.55   26.80
  -3  -1   8  538.15   28.70
  -3  -1   8  535.15   28.10
  -3  -1   8  515.55   25.10
  -3  -1   8  551.54   32.40
   3   2  -8   34.90    6.80
   3   2  -8   42.00    8.50
  -3  -2   8   43.50   10.90
  -3  -2   8   50.99    9.40
  -3  -2   8   37.30    8.00
  -3  -2   8   28.10    6.10
  -3  -2   8   45.90    9.40
  -3  -2   8   37.70    7.40
  -3  -2   8   36.00    8.00
   3   3  -8  123.09   10.50
   3   3  -8  157.78   12.70
  -3  -3   8  170.08   13.30
  -3  -3   8  143.89   10.60
  -3  -3   8  140.89   11.10
  -3  -3   8  153.58   12.20
  -3  -3   8  140.89   13.20
  -3  -3   8  142.99   13.50
  -3  -3   8  147.59   13.30
  -3  -3   8  130.19   15.60
  -3  -3   8  143.89   12.70
   3   4  -8 1147.79   50.99
   3   4  -8 1272.87   59.79
  -3  -4   8 1241.48   52.99
  -3  -4   8 1235.68   53.49
  -3  -4   8 1184.88   49.99
  -3  -4   8 1190.68   53.19
  -3  -4   8 1275.47   59.59
  -3  -4   8 1241.78   49.30
  -3  -4   8 1216.88   54.49
  -3  -4   8 1233.78   51.59
   3   5  -8  677.83   33.50
   3   5  -8  672.43   37.90
  -3  -5   8  712.83   35.30
  -3  -5   8  721.13   38.70
  -3  -5   8  723.83   34.10
  -3  -5   8  744.63   41.20
  -3  -5   8  713.03   35.90
  -3  -5   8  768.92   34.00
  -3  -5   8  672.33   35.50
  -3  -5   8  765.42   37.50
   3   6  -8  176.98   16.80
  -3  -6   8  166.58   17.30
  -3  -6   8  130.19   17.60
  -3  -6   8  146.49   10.90
  -3  -6   8  153.78   14.20
  -3  -6   8  163.08   13.70
  -3  -6   8  162.48   14.60
  -3  -6   8  138.19   13.20
  -3  -6   8  133.89   12.30
  -3  -6   8  147.59   13.80
  -3  -7   8  537.15   29.20
  -3  -7   8  570.14   27.50
  -3  -7   8  552.94   33.30
  -3  -7   8  623.54   29.30
  -3  -7   8  614.44   30.80
  -3  -7   8  539.85   30.20
  -3  -7   8  572.74   30.50
  -3  -8   8   17.30    5.10
  -3  -8   8   16.30    5.40
  -3  -8   8    6.40    4.70
  -3  -8   8    8.70    5.00
  -3  -8   8   14.10    5.90
  -3  -8   8   14.00    5.20
  -3  -8   8   12.10    4.30
  -3  -9  -8   16.00    5.00
  -3  -9   8   15.90    3.70
  -3  -9   8    8.10    4.80
  -3  -9   8   10.10    4.70
  -3  -9   8   14.40    4.90
   3   9   8   18.60    4.40
  -3  -9   8   12.00    5.10
  -3 -10  -8   21.00    4.50
   3  10   8   19.10    4.00
   3  -9  -9   70.29    8.50
   3  -9   9   64.49    8.60
   3  -9   9   57.69    8.20
   3  -8  -9    8.50    6.20
   3  -8   9    3.40    4.00
   3  -8   9   11.00    5.50
  -3   8   9    5.90    3.00
   3  -7  -9  122.79   15.40
  -3   7   9  118.99    9.00
   3  -7   9  115.39   10.20
   3  -7   9  123.49   11.50
   3  -7   9  137.39   10.70
   3  -7   9  127.19   12.40
   3  -7   9  120.39   14.30
   3  -6  -9    3.50    5.60
   3  -6   9    7.60    4.30
   3  -6   9    5.00    4.50
   3  -6   9   -2.30    3.20
   3  -6   9    9.60    5.10
   3  -6   9    8.50    4.40
   3  -6   9    6.40    5.30
  -3   6   9    6.60    3.00
  -3   5  -9   32.60    6.00
   3  -5  -9   11.00    5.50
   3  -5  -9   21.70    6.20
   3  -5   9   11.00    6.80
  -3   5   9   25.80    5.00
   3  -5   9   20.60    6.50
   3  -5   9   14.00    5.90
   3  -5   9   11.90    5.80
   3  -5   9   18.80    6.00
  -3   4  -9   12.30    5.70
  -3   4  -9   19.00    5.20
   3  -4  -9   13.50    6.70
   3  -4  -9   17.60    6.90
  -3   4  -9   22.80    5.50
  -3   4  -9    7.10    6.60
   3  -4   9   13.00    5.60
   3  -4   9   14.10    4.70
   3  -4   9    7.10    4.80
   3  -4   9   10.70    5.20
   3  -4   9   13.60    5.30
   3  -4   9   10.50    5.30
   3  -4   9    9.70    5.40
   3  -3  -9 1077.89   47.70
   3  -3  -9 1076.79   54.39
   3  -3   9 1146.99   50.29
   3  -1   9  273.77   18.50
   3   0  -9    1.10    3.20
   3   0  -9    3.30    3.80
   3   0  -9   -3.50    3.20
  -3   0   9    3.70    3.80
  -3   0   9    7.00    4.30
  -3   0   9    0.40    4.50
  -3   0   9    3.70    6.40
   3   1  -9  272.07   17.40
   3   1  -9  281.47   22.70
   3   1  -9  267.27   17.70
  -3  -1   9  240.28   15.90
  -3  -1   9  276.27   17.60
  -3  -1   9  266.27   18.60
  -3  -1   9  252.17   19.20
  -3  -1   9  283.07   19.70
  -3  -1   9  271.27   22.30
   3   2  -9    3.10    4.00
   3   2  -9    2.30    3.60
   3   2  -9    9.70    5.20
  -3  -2   9    8.70    4.90
  -3  -2   9    4.20    4.30
  -3  -2   9    0.60    3.60
  -3  -2   9    5.40    4.70
  -3  -2   9   11.20    5.00
  -3  -2   9    8.10    5.60
  -3  -2   9   11.40    6.00
   3   3  -9 1093.39   44.60
   3   3  -9 1062.19   48.70
   3   3  -9 1158.78   47.40
  -3  -3   9 1155.38   46.40
  -3  -3   9 1177.68   51.09
  -3  -3   9 1100.29   55.39
  -3  -3   9 1143.49   48.50
  -3  -3   9 1103.99   49.10
  -3  -3   9 1091.09   49.60
  -3  -3   9 1129.29   50.99
   3   4  -9   19.20    8.80
   3   4  -9   12.40    5.40
  -3  -4   9   18.10    7.70
  -3  -4   9   13.20    5.60
  -3  -4   9    9.50    5.60
  -3  -4   9   20.00    5.60
  -3  -4   9    8.50    5.10
  -3  -4   9   15.70    6.10
  -3  -4   9    8.70    4.70
  -3  -4   9    9.80    4.80
  -3  -4   9   10.20    5.30
   3   5  -9   27.20    9.00
  -3  -5   9   17.60    7.00
  -3  -5   9   18.90    5.70
  -3  -5   9   28.50    7.20
  -3  -5   9   14.10    5.80
  -3  -5   9   16.80    6.40
  -3  -5   9   27.70    7.70
  -3  -5   9   25.10    8.30
  -3  -5   9   16.70    5.50
  -3  -6   9    2.60    3.20
  -3  -6   9    4.10    4.30
  -3  -6   9    1.00    3.90
  -3  -6   9    1.40    4.30
  -3  -6   9    8.00    3.40
  -3  -6   9    7.30    4.80
  -3  -6   9    6.20    4.60
  -3  -6   9    4.80    4.40
  -3  -7   9  127.89   12.00
  -3  -7   9  141.39   12.60
  -3  -7   9  150.38   12.10
  -3  -7   9   94.69   12.20
  -3  -7   9  125.59   13.50
  -3  -7   9  106.89   11.40
  -3  -7   9   95.59   11.20
  -3  -8   9   17.40    7.00
  -3  -8   9    6.40    4.30
  -3  -8   9    8.60    3.80
  -3  -8   9   21.20    5.90
  -3  -8   9   10.40    3.70
  -3  -8   9    3.80    3.40
  -3  -9   9   69.79    8.50
  -3  -9   9   52.19    7.80
  -3  -9   9   54.29    7.90
   3   9   9   73.09    5.90
   3  -8 -10   29.50    6.30
   3  -8  10   31.30    5.70
   3  -8  10   30.80    6.60
   3  -8  10   23.90    5.50
   3  -7 -10  123.89   12.20
   3  -7  10  113.19   11.40
   3  -7  10  131.39   10.70
  -3   7  10  126.19   11.60
   3  -6 -10   99.09   13.30
   3  -6  10   93.89   11.30
   3  -6  10   89.29   11.80
   3  -6  10  103.19   12.90
   3  -6  10   79.79   10.60
   3  -5 -10  523.05   30.00
   3  -5 -10  487.85   24.00
   3  -5  10  517.95   26.60
   3  -5  10  439.26   22.60
   3  -5  10  497.55   24.50
   3  -5  10  494.65   27.60
   3  -5  10  494.75   24.80
   3  -5  10  478.15   25.70
  -3   4 -10   23.90    5.40
   3  -4 -10   19.30    8.10
  -3   4 -10   42.30    8.50
  -3   4 -10   29.70    7.30
  -3   4 -10   24.80    6.40
   3  -4 -10   31.80    7.40
   3  -4  10   22.70    5.70
   3  -4  10   16.80    6.30
   3  -4  10   26.40    6.70
   3  -4  10   36.40    7.70
   3  -4  10   39.30    7.30
   3  -3 -10  113.69   16.00
   3  -3 -10   58.19   15.80
   3  -3 -10  112.99   14.60
   3  -3  10   77.99   10.40
   3  -3  10  118.39   15.00
   3  -3  10  111.19   11.20
  -3   1  10 1018.20   45.40
   3  -1  10  957.90   45.60
   3  -1  10  941.81   43.00
   3   0 -10  133.79   12.60
   3   0 -10  131.39   12.80
   3   0 -10  139.39   16.70
  -3   0  10  122.09   12.30
  -3   0  10  132.09   13.80
  -3   0  10  122.39   12.40
   3   0  10  136.29   12.10
   3   1 -10  906.71   42.00
   3   1 -10  915.81   43.00
   3   1 -10  880.41   43.80
  -3  -1  10  991.90   41.80
  -3  -1  10  934.11   41.20
  -3  -1  10  997.20   45.80
  -3  -1  10  987.50   44.60
  -3  -1  10  934.41   42.10
  -3  -1  10  950.60   43.40
  -3  -1  10  971.70   41.00
   3   2 -10   91.99   12.20
   3   2 -10   92.29   13.40
   3   2 -10   82.59   10.80
  -3  -2  10   82.29   12.70
  -3  -2  10   77.49   11.50
  -3  -2  10   75.49   10.50
  -3  -2  10   77.79   10.90
  -3  -2  10   74.39   11.80
  -3  -2  10   89.89   12.00
   3   3 -10   66.39   10.10
   3   3 -10   75.69   12.50
   3   3 -10   98.79   12.00
   3   3 -10  123.79   19.50
  -3  -3  10   80.09    9.90
  -3  -3  10   92.69   12.30
  -3  -3  10   97.19   12.30
  -3  -3  10   86.89   11.80
  -3  -3  10   69.89   11.30
  -3  -3  10   83.09   11.90
   3   4 -10   32.30    6.20
   3   4 -10   20.50    5.00
  -3  -4  10   31.50    7.70
  -3  -4  10   33.00    7.80
  -3  -4  10   22.80    6.30
  -3  -4  10   26.60    7.00
  -3  -4  10   30.70    8.30
  -3  -5  10  492.55   27.90
  -3  -5  10  541.05   28.00
  -3  -5  10  566.64   29.50
  -3  -5  10  491.85   24.00
  -3  -5  10  501.35   27.00
  -3  -5  10  542.45   26.40
  -3  -5  10  507.55   24.40
  -3  -6  10  105.39    9.70
  -3  -6  10   93.59   11.50
  -3  -6  10   75.19   10.10
  -3  -6  10   79.69   11.40
  -3  -6  10   81.19   10.50
  -3  -6  10   88.19   11.50
  -3  -6  10   54.09    7.30
  -3  -7  10  106.29   10.50
  -3  -7  10  143.39   11.30
  -3  -7  10  157.18   14.00
  -3  -7  10  120.49   10.60
  -3  -7  10  101.29   12.10
  -3  -7  10  123.19    9.80
  -3  -8  10   22.10    5.30
  -3  -8  10   20.50    5.40
  -3  -8  10   24.30    4.40
  -3  -8  10   26.70    5.40
   3  -7 -11   39.90    7.00
   3  -7  11   25.70    5.50
   3  -7  11   21.80    4.70
  -3   7  11   26.20    5.40
   3  -7  11   21.90    5.10
  -3   7  11   21.50    3.80
   3  -6 -11  152.48   12.80
   3  -6  11  147.79   11.00
  -3   6  11  133.89    9.80
   3  -6  11  132.79   10.20
   3  -6  11  123.19   10.80
  -3   6  11  111.99   10.50
   3  -5 -11   27.90    7.80
   3  -5 -11   35.80    9.00
  -3   5 -11   30.70    6.60
  -3   5  11   21.70    5.40
  -3   5  11   15.40    5.20
   3  -5  11   34.00    6.50
   3  -5  11   32.60    7.10
   3  -5  11   30.30    6.20
   3  -5  11   19.90    5.80
   3  -4 -11    6.50    4.50
   3  -4  11    5.60    3.90
  -3   4  11    2.20    3.70
  -3   4  11    8.30    4.00
   3  -4  11    6.30    5.00
   3  -4  11   -2.00    3.60
   3  -4  11    4.10    4.40
   3  -3 -11  274.07   17.30
  -3   3 -11  251.57   16.60
  -3   3  11  238.48   16.60
   3  -3  11  236.18   15.90
   3  -3  11  251.67   17.90
  -3   3  11  250.77   18.30
   3  -2 -11    4.80    4.50
  -3   2  11    9.30    4.70
  -3   2  11    5.70    4.70
   3  -1 -11  464.35   24.90
  -3   1  11  457.65   26.30
   3  -1  11  410.66   25.60
   3  -1  11  442.86   23.80
  -3   1  11  432.26   24.50
   3   0 -11   -0.90    4.10
  -3   0  11    3.80    3.70
  -3   0  11   -0.70    2.50
  -3   0  11    4.00    5.00
  -3   0  11    5.10    4.20
   3   0  11    1.20    2.80
  -3   0  11    5.00    3.50
   3   1 -11  433.26   23.70
  -3  -1  11  444.76   24.60
  -3  -1  11  427.26   22.40
  -3  -1  11  424.26   24.60
  -3  -1  11  422.16   25.40
   3   2 -11   13.50    4.70
  -3  -2  11    0.00    3.60
  -3  -2  11   12.70    4.50
  -3  -2  11   13.50    5.20
  -3  -2  11    4.60    4.10
  -3  -2  11    6.90    4.60
  -3  -2  11    3.60    3.70
   3   3 -11  227.28   15.60
  -3  -3  11  248.68   17.70
  -3  -3  11  211.68   15.30
  -3  -3  11  250.17   16.70
  -3  -3  11  241.98   17.40
  -3  -3  11  240.48   13.90
  -3  -3  11  229.58   15.30
   3   4 -11    9.60    5.90
  -3  -4  11    7.50    5.70
  -3  -4  11    0.90    3.90
  -3  -4  11    1.30    3.80
  -3  -4  11   -4.10    3.10
  -3  -4  11    2.70    3.80
  -3  -4  11    4.90    4.10
  -3  -5  11   14.50    5.20
  -3  -5  11   21.70    6.00
  -3  -5  11   25.40    6.10
  -3  -5  11   28.80    6.70
  -3  -5  11   39.00    6.00
  -3  -5  11   17.10    5.50
  -3  -6  11  151.48   11.20
  -3  -6  11  133.39   10.00
  -3  -6  11  130.09   11.10
  -3  -6  11  138.69   11.00
  -3  -6  11  147.69   11.50
  -3  -7  11   18.40    4.50
  -3  -7  11   20.00    4.40
  -3  -7  11   20.80    4.30
  -3  -7  11   20.20    4.50
  -3   5 -12  259.27   20.00
   3  -5 -12  237.58   18.50
  -3   5  12  243.38   14.10
  -3   5  12  265.57   14.40
   3  -5  12  226.38   14.20
   3  -5  12  219.88   12.40
  -3   5  12  205.98   11.80
  -3   4 -12   60.49    8.00
  -3   4 -12   69.69    8.70
   3  -4 -12   67.09    7.90
   3  -4  12   71.99    8.20
  -3   4  12   59.59    7.20
  -3   4  12   68.69    9.20
   3  -4  12   71.99    6.90
  -3   4  12   79.39    9.40
   3  -4  12   58.89    8.60
   3  -3 -12  133.09   10.90
  -3   3 -12  131.89   10.70
  -3   3 -12  167.98   13.40
  -3   3  12  161.48   11.60
   3  -3  12  142.69   10.50
  -3   3  12  118.69   15.60
   3  -3  12  128.99   11.70
  -3   3  12  132.49   10.40
   3  -2 -12   76.29    9.90
  -3   2  12   80.49    9.90
  -3   2  12   90.89   11.80
   3  -1 -12  179.08   13.80
  -3   1  12  164.68   12.40
  -3   1  12  183.08   14.20
   3  -1  12  189.98   12.70
   3  -1  12  184.68   14.40
  -3   1  12  179.88   13.30
   3   0 -12   32.90    7.00
  -3   0  12   34.90    6.50
  -3   0  12   15.70    5.20
   3   0  12   14.80    4.50
  -3   0  12   13.00    4.80
   3   0  12   24.70    6.50
   3   1 -12  199.28   13.80
  -3  -1  12  194.18   12.30
  -3  -1  12  150.38   12.50
  -3  -1  12  162.48   11.50
  -3  -1  12  198.58   14.50
   3   2 -12   82.99   10.10
  -3  -2  12   78.69   11.10
  -3  -2  12   79.19   10.20
  -3  -2  12   73.69   10.20
  -3  -2  12   89.09    8.50
  -3  -2  12   94.19    8.00
   3   3 -12  136.69   10.70
  -3  -3  12  126.29   12.30
  -3  -3  12  138.59   10.10
  -3  -3  12  130.39   10.80
  -3  -3  12  133.39   11.60
   3   4 -12   68.29    7.90
  -3  -4  12   45.80    7.00
  -3  -4  12   45.00    6.70
  -3  -4  12   65.69    7.80
  -3  -4  12   57.09    8.50
  -3  -4  12   76.29    9.40
   3   5 -12  243.58   13.80
  -3  -5  12  232.48   14.30
  -3  -5  12  219.28   13.20
  -3  -5  12  217.58   12.70
  -3  -5  12  248.58   13.30
  -3   3 -13   69.19    7.60
   3  -3 -13   66.19    7.10
  -3   3 -13   81.59    9.60
  -3   3  13   47.80    4.90
  -3   3  13   53.39    6.90
  -3   3  13   68.89    6.40
   3  -3  13   67.19    7.80
   3  -2 -13  152.98   10.70
  -3   2 -13  162.78   11.00
  -3   2  13  149.39   10.80
   3  -2  13  158.48   11.30
  -3   2  13  149.59    9.30
  -3   2  13  184.88   10.60
   3  -1 -13  140.39   10.20
  -3   1  13  127.39   10.30
  -3   1  13  135.89    9.20
  -3   1  13  153.88    9.70
   3  -1  13  139.19   10.80
   3   0 -13    2.90    3.10
  -3   0  13   -1.70    2.70
  -3   0  13   -2.00    2.70
   3   0  13   -0.90    3.00
  -3   0  13    9.70    3.80
   3   1 -13  148.19   10.10
  -3  -1  13  139.79   10.70
  -3  -1  13  133.49   10.70
  -3  -1  13  134.59   11.40
  -3  -1  13  130.79   10.60
   3   2 -13  153.98   13.20
  -3  -2  13  163.88   11.30
  -3  -2  13  153.68    9.80
   3   3 -13   78.29    6.60
  -3  -3  13   59.19    7.30
  -3  -3  13   63.09    5.80
  -3  -3  13   77.69    6.60
   4 -12   0  880.71   37.40
  -4  12   0  855.91   35.00
  -4  12   0  894.51   34.80
  -4  12   0  818.12   35.50
   4 -11   0    1.40    4.40
  -4  11   0    1.80    3.00
  -4  11   0    9.30    5.30
   4 -11   0    7.60    5.40
  -4  10   0  108.09   10.50
   4 -10   0  125.79   15.30
  -4  10   0  103.49   10.20
   4 -10   0  133.79   13.00
  -4  10   0  116.59   11.70
  -4  10   0  114.09    9.60
  -4   9   0    3.00    2.80
  -4   9   0    2.10    3.80
   4  -9   0   15.90    5.70
   4  -9   0    1.60    5.20
  -4   9   0    0.20    3.50
   4  -9   0    0.30    4.80
  -4   9   0    6.00    5.30
  -4   8   0   55.79    7.90
   4  -8   0   70.39   11.10
   4  -8   0   61.59    7.50
   4  -8   0   53.19   11.40
  -4   8   0   63.09    8.30
   4  -8   0   75.19   10.90
   4  -7   0    7.40    2.80
  -4   7   0    8.50    3.70
   4  -7   0   20.10    7.10
  -4   7   0    8.50    3.20
  -4   7   0    9.20    3.90
   4  -7   0   10.80    4.90
  -4   6   0  834.82   33.10
   4  -6   0  834.32   37.80
  -4   6   0  790.32   32.10
  -4   6   0  793.22   33.10
  -4   5   0    0.40    2.20
   4  -5   0   -1.60    2.60
  -4   5   0    1.80    2.20
  -4   4   0 2849.22  100.49
  -4   4   0 2829.82  100.29
   4  -4   0 2865.91  102.99
  -4   3   0    2.90    2.60
   4  -3   0    2.50    2.40
   4  -2   0    2.90    1.80
   4  -2   0    3.00    2.20
   4  -2   0    2.20    2.30
   4  -1   0   39.90    4.40
   4   0   0    5.80    2.20
   4   1   0   40.70    4.30
   4   1   0   41.50    4.00
   4   2   0    2.10    1.70
   4   3   0    3.00    1.90
   4   4   0 3009.20  102.09
  -4  -4   0 2803.02  103.99
  -4  -5   0    4.20    2.80
   4   5   0    1.60    1.90
   4   6   0  897.91   34.70
  -4  -6   0  849.22   37.30
  -4  -6   0  834.52   36.60
  -4  -7   0    3.30    6.30
  -4  -7   0   12.40    4.90
  -4  -7   0   14.40    5.60
  -4  -7   0    5.20    4.60
  -4  -7   0    4.60    3.90
  -4  -7   0   10.30    3.90
  -4  -7   0   18.90    5.50
  -4  -8   0   48.10   10.70
   4   8   0   49.99    6.80
  -4  -8   0   63.29   10.10
  -4  -8   0   59.89   11.90
  -4  -8   0   54.79   13.50
  -4  -8   0   80.69   13.50
  -4  -8   0   50.89    9.30
  -4  -9   0    1.10    6.10
  -4  -9   0    2.80    5.80
  -4  -9   0    0.30    2.80
  -4  -9   0    4.30    3.70
  -4  -9   0    2.50    4.80
  -4  -9   0   -0.70    3.20
  -4 -10   0   99.19   16.50
  -4 -10   0   86.59   15.00
  -4 -11   0    6.60    6.20
  -4 -11   0    3.30    5.80
   4  12   0  797.62   34.10
  -4 -12   0  815.72   38.30
  -4  12  -1   10.10    4.00
  -4  12  -1    7.10    2.90
   4 -12  -1    3.80    4.40
  -4  12   1    6.70    3.60
   4 -12   1   -4.30    3.50
  -4  12   1    3.90    3.60
  -4  12   1    6.20    3.20
   4 -11  -1   14.40    5.70
   4 -11  -1   31.40    7.70
  -4  11  -1   39.30    7.80
  -4  11  -1   27.20    5.50
  -4  11   1   29.80    7.00
   4 -11   1   23.30    7.00
   4 -10  -1  301.17   20.60
  -4  10  -1  338.87   17.10
  -4  10  -1  321.97   18.50
   4 -10  -1  317.87   20.90
   4 -10   1  316.97   21.00
  -4  10   1  333.77   17.30
   4 -10   1  298.77   20.20
  -4  10   1  331.77   19.40
  -4  10   1  315.97   20.00
  -4  10   1  309.87   19.10
  -4   9  -1    6.80    4.10
   4  -9  -1    0.40    3.50
  -4   9  -1    7.30    3.50
   4  -9  -1    6.80    5.50
   4  -9   1    8.70    5.80
   4  -9   1    4.90    4.30
  -4   9   1    0.30    2.40
  -4   9   1    6.30    4.10
  -4   9   1    3.70    4.00
   4  -9   1    4.50    4.60
   4  -9   1    3.30    4.70
  -4   8  -1  349.27   17.50
   4  -8  -1  334.07   21.00
   4  -8  -1  312.67   17.90
   4  -8   1  276.07   22.50
  -4   8   1  356.56   18.90
   4  -8   1  297.07   19.10
   4  -8   1  327.17   20.40
   4  -8   1  307.77   20.00
  -4   8   1  292.27   18.90
  -4   8   1  311.37   16.70
  -4   8   1  336.87   19.00
   4  -7  -1  100.89   14.60
   4  -7  -1  100.99   12.30
  -4   7  -1   78.09    9.50
  -4   7  -1   86.59    7.80
   4  -7  -1   91.19    8.70
   4  -7   1   87.59    7.20
  -4   7   1   93.89    7.90
   4  -7   1  125.99   19.20
  -4   7   1   94.19    8.60
   4  -7   1   94.39   14.30
  -4   7   1   81.69    8.20
   4  -7   1  103.19   12.30
   4  -7   1  103.69   12.60
  -4   6  -1   18.60    4.30
  -4   6  -1   19.00    4.20
   4  -6  -1    9.10    5.30
   4  -6   1   13.20    5.50
  -4   6   1    9.30    3.70
  -4   6   1   12.50    4.10
  -4   6   1    9.70    3.90
  -4   5  -1   40.80    5.60
   4  -5  -1   25.50    6.50
  -4   5  -1   42.60    5.40
  -4   5   1   23.40    4.50
  -4   5   1   31.50    5.50
   4  -5   1   37.50    7.10
  -4   4  -1 3085.89  106.99
   4  -4  -1 3106.19  110.19
  -4   4  -1 2942.21  107.09
  -4   4   1 2985.70  107.39
  -4   4   1 3030.40  107.69
   4  -4   1 3161.38  110.39
  -4   3  -1  472.85   19.50
   4  -3  -1  500.75   19.20
   4  -3  -1  477.05   19.90
  -4   3  -1  462.65   19.60
  -4   3  -1  487.75   19.50
   4  -3  -1  477.85   21.00
   4  -3   1  460.55   21.00
  -4   3   1  528.05   20.10
   4  -2  -1 5006.40  172.78
   4  -1  -1 5925.71  214.68
   4   0  -1    3.00    2.00
   4   0  -1    4.60    2.10
  -4   0   1    2.70    1.90
  -4   0   1    3.40    1.90
   4   3   1  505.25   21.80
   4   3   1  541.55   21.90
   4   3   1  504.65   21.10
  -4  -3   1  586.84   23.20
   4   4   1 3018.90  109.69
   4   4   1 3123.29  110.69
   4   4   1 3339.57  111.59
  -4  -5  -1   27.90    5.50
   4   5   1   33.30    4.60
   4   5   1   36.90    5.30
  -4  -5   1   25.40    5.20
  -4  -6  -1   19.00    5.00
  -4  -6  -1   13.90    4.80
  -4  -6  -1   22.10    5.40
   4   6   1    9.80    3.10
  -4  -6   1   11.60    4.20
   4   6   1   14.00    3.80
   4   6   1   15.20    3.40
  -4  -7  -1   82.89   12.10
  -4  -7  -1   79.79   10.70
  -4  -7  -1   67.19    9.80
  -4  -7  -1   78.89   11.30
  -4  -7  -1   86.89    7.70
  -4  -7  -1   96.29   15.40
  -4  -7   1   83.99   13.60
  -4  -7   1   90.89   12.00
  -4  -7   1   77.29   13.50
  -4  -7   1   89.59    9.10
  -4  -7   1   78.09   12.90
   4   7   1   95.29    8.40
  -4  -7   1   87.79    8.40
  -4  -7   1   78.09   12.70
  -4  -7   1   75.89   11.20
  -4  -7   1   90.59   11.50
  -4  -7   1   98.99   17.00
   4   7   1   98.69    8.10
  -4  -8  -1  337.37   25.30
  -4  -8  -1  347.67   21.40
  -4  -8  -1  344.47   23.10
  -4  -8  -1  362.96   21.60
  -4  -8  -1  323.47   21.30
  -4  -8  -1  344.47   25.20
  -4  -8   1  304.57   23.20
  -4  -8   1  320.87   19.80
   4   8   1  329.07   18.50
  -4  -8   1  310.27   19.90
  -4  -8   1  359.06   19.80
   4   8   1  336.27   16.40
  -4  -8   1  354.86   25.70
  -4  -8   1  316.87   19.70
  -4  -8   1  300.37   23.20
  -4  -9  -1   12.20    5.80
  -4  -9  -1    2.40    6.10
  -4  -9  -1    1.60    3.80
  -4  -9  -1    8.80    8.50
   4   9   1    3.50    3.30
  -4  -9   1   13.10    8.00
  -4  -9   1    6.10    6.00
  -4  -9   1    6.60    4.50
   4   9   1    3.00    3.40
  -4  -9   1    6.40    4.70
  -4  -9   1    3.90    3.70
  -4  -9   1    0.80    3.30
  -4 -10  -1  332.37   25.00
  -4 -10  -1  388.56   25.70
  -4 -10   1  291.47   23.40
   4  10   1  341.07   19.40
   4  10   1  344.77   17.30
  -4 -10   1  330.57   24.80
   4  10   1  308.37   19.60
  -4 -11  -1   35.70    9.80
  -4 -11  -1   21.30    8.30
  -4 -11   1   27.30    8.80
  -4 -11   1   32.70    9.00
   4  11   1   31.10    6.70
  -4 -12  -1    6.00    3.80
  -4 -12  -1    0.90    4.70
  -4 -12   1    2.20    4.90
   4  12   1    9.50    3.90
   4  12   1    7.50    3.20
  -4  12  -2  478.65   24.30
   4 -12  -2  512.05   24.50
  -4  12   2  497.55   23.40
   4 -12   2  515.65   24.70
  -4  12   2  528.05   23.10
  -4  12   2  539.35   22.30
   4 -11  -2  334.67   20.60
   4 -11  -2  344.27   20.50
  -4  11   2  336.87   17.30
  -4  11   2  325.27   18.60
   4 -11   2  330.77   20.30
   4 -11   2  284.47   25.00
  -4  11   2  340.47   19.30
   4 -10  -2  298.77   20.40
   4 -10  -2  328.67   20.80
   4 -10   2  288.07   19.10
  -4  10   2  338.77   17.40
   4 -10   2  318.67   20.70
  -4  10   2  293.57   20.10
  -4  10   2  317.97   19.90
  -4  10   2  311.27   19.00
   4  -9  -2   51.79    7.90
   4  -9  -2   58.19   10.60
  -4   9   2   59.59    9.00
  -4   9   2   50.99    7.90
   4  -9   2   53.79    9.50
  -4   9   2   53.29    8.80
   4  -9   2   42.00    9.80
   4  -9   2   65.29   14.30
  -4   9   2   54.29   10.30
   4  -8  -2   38.30    8.70
   4  -8  -2   41.40   11.70
  -4   8  -2   51.49    6.90
  -4   8   2   40.10    7.50
   4  -8   2   38.80   10.30
   4  -8   2   84.19   12.10
  -4   8   2   52.19    8.70
   4  -8   2   51.49    9.50
  -4   8   2   32.80    6.90
  -4   8   2   53.39    7.90
   4  -7  -2    1.00    2.70
  -4   7  -2    1.90    3.00
   4  -7  -2    9.10    4.90
   4  -7   2    5.30    4.50
   4  -7   2   -1.20    3.80
  -4   7   2    1.30    2.40
  -4   7   2    3.20    3.30
  -4   7   2    3.70    3.20
   4  -7   2    7.10    3.70
  -4   7   2    3.60    3.30
   4  -7   2    3.90    2.80
  -4   6  -2 1326.67   48.60
   4  -6  -2 1204.08   53.89
   4  -6  -2 1220.28   51.59
  -4   6   2 1362.46   51.09
   4  -6   2 1272.97   52.49
  -4   6   2 1261.47   50.19
   4  -6   2 1348.57   54.79
   4  -5  -2  171.28   13.40
   4  -5  -2  182.58   11.10
  -4   5  -2  206.68   10.40
  -4   5   2  180.08   11.20
  -4   5   2  173.78   11.00
   4  -5   2  196.88   13.50
   4  -4  -2 1539.95   57.09
   4  -4  -2 1511.75   57.29
   4  -4   2 1574.74   59.89
  -4   4   2 1600.44   57.29
   4  -3  -2  151.58    9.00
   4  -3  -2  145.59    8.10
   4  -3  -2  148.49    8.50
  -4   3  -2  132.69    8.30
   4  -3   2  140.49    9.80
  -4   3   2  155.88    8.60
   4  -2  -2  261.57   12.60
  -4   2  -2  246.18   11.50
  -4   2  -2  254.57   12.60
   4  -2  -2  268.57   12.20
   4  -1  -2 3940.51  136.39
   4   0  -2  115.39    6.80
   4   0  -2  124.19    6.70
  -4   0   2  113.89    6.10
  -4   0   2  121.39    6.30
  -4  -2   2  263.57   19.30
  -4  -3   2  148.09    9.10
  -4  -4   2 1653.13   61.29
  -4  -5   2  185.58   11.50
  -4  -6  -2 1240.08   50.09
  -4  -6  -2 1226.88   51.89
  -4  -6   2 1263.77   49.99
   4   6   2 1308.27   48.60
  -4  -6   2 1229.28   49.50
   4   6   2 1329.67   50.19
  -4  -6   2 1190.28   48.40
  -4  -7  -2   -1.80    2.80
  -4  -7  -2    7.30    5.00
  -4  -7  -2    5.40    3.90
  -4  -7  -2    2.90    3.40
  -4  -7   2   10.00    4.00
  -4  -7   2    4.60    5.00
   4   7   2    1.80    2.40
  -4  -7   2    4.80    4.10
  -4  -7   2    4.50    3.00
  -4  -7   2    4.80    4.70
  -4  -7   2    6.30    3.50
  -4  -7   2    9.20    5.60
   4   7   2    5.00    2.90
  -4  -7   2    7.80    3.90
   4   7   2    1.00    2.90
  -4  -7   2    1.40    4.20
  -4  -7   2    0.40    3.60
  -4  -7   2   -1.90    3.80
  -4  -8  -2   64.49    8.20
  -4  -8  -2   43.50    9.20
  -4  -8  -2   51.59   10.00
   4   8   2   46.70    7.60
   4   8   2   42.80    7.00
  -4  -8   2   53.59    9.30
   4   8   2   48.30    8.40
  -4  -8   2   40.80   10.70
   4   8   2   58.59   10.60
  -4  -8   2   41.70   10.70
  -4  -8   2   29.40    8.30
  -4  -8   2   57.79   10.60
  -4  -8   2   33.70    7.20
  -4  -8   2   57.99    9.60
   4   8   2   47.50    7.90
  -4  -8   2   46.70    8.40
  -4  -9  -2   47.90   10.60
  -4  -9  -2   55.49   10.70
  -4  -9  -2   47.60   10.50
  -4  -9  -2   61.09   14.20
   4   9   2   49.80    9.40
  -4  -9   2   44.20   11.00
   4   9   2   49.50    8.50
  -4  -9   2   60.29    9.40
  -4  -9   2   45.30    8.90
  -4  -9   2   69.69   14.20
   4   9   2   45.90    7.90
  -4  -9   2   55.39   10.00
   4   9   2   55.59    7.90
  -4 -10  -2  319.07   24.60
  -4 -10  -2  343.37   24.10
   4  10   2  304.57   19.40
  -4 -10   2  280.87   22.30
   4  10   2  329.37   19.30
  -4 -10   2  326.07   24.20
   4  10   2  287.67   16.50
   4  10   2  296.87   17.80
  -4 -10   2  309.67   19.50
  -4 -11  -2  369.16   23.50
  -4 -11  -2  287.87   22.20
   4  11   2  295.27   16.20
  -4 -11   2  331.57   22.90
   4  11   2  323.17   17.50
  -4 -12  -2  474.15   25.60
  -4 -12  -2  516.75   27.50
  -4 -12   2  501.95   26.60
   4  12   2  534.35   23.60
   4  12   2  543.85   22.70
   4  12   2  534.95   22.50
   4 -12  -3   88.89    8.80
  -4  12   3   61.29    8.10
  -4  12   3   69.29    6.50
   4 -12   3   68.99    8.70
   4 -11  -3  168.78   14.10
  -4  11   3  179.18   13.10
  -4  11   3  170.18   11.40
   4 -11   3  188.28   14.30
  -4  11   3  176.68   15.40
   4 -10  -3  189.08   16.00
   4 -10  -3  232.98   17.00
   4 -10  -3  211.28   12.90
   4 -10   3  234.28   17.20
  -4  10   3  215.48   14.80
   4 -10   3  189.78   15.10
  -4  10   3  210.68   13.30
   4  -9  -3  140.89   13.50
   4  -9  -3  132.99   11.70
  -4   9   3  115.29   12.00
   4  -9   3  130.39   18.60
  -4   9   3  148.19   12.70
  -4   9   3  132.09   13.10
   4  -9   3  142.49   13.10
   4  -9   3  153.88   14.30
   4  -9   3  165.88   14.30
  -4   9   3  138.59   12.80
   4  -8  -3  816.72   36.60
   4  -8  -3  792.62   37.30
   4  -8   3  779.42   38.50
  -4   8   3  786.42   33.00
  -4   8   3  758.02   35.90
  -4   8   3  746.93   36.60
   4  -8   3  759.42   36.50
   4  -8   3  772.92   36.50
  -4   8   3  707.33   34.90
   4  -8   3  789.92   41.50
   4  -7  -3   10.90    4.50
   4  -7  -3   11.40    4.40
   4  -7  -3   13.70    5.30
   4  -7   3   13.60    5.90
  -4   7   3    6.00    3.60
  -4   7   3    6.20    3.80
   4  -7   3    3.90    3.60
  -4   7   3    5.20    3.90
   4  -7   3    8.10    4.40
  -4   7   3   12.80    4.30
   4  -7   3    9.50    5.70
   4  -7   3   14.20    5.70
   4  -6  -3  188.28   13.50
   4  -6  -3  181.38   12.20
   4  -6   3  189.08   14.30
   4  -6   3  142.49   12.50
  -4   6   3  174.28   10.90
  -4   6   3  183.98   13.30
   4  -6   3  172.58   13.40
   4  -6   3  198.08   14.10
  -4   6   3  162.68   11.70
   4  -6   3  167.38   14.30
  -4   5  -3  571.64   23.30
   4  -5  -3  555.84   25.50
  -4   5   3  565.94   25.00
  -4   5   3  571.84   25.70
  -4   5   3  529.95   23.60
   4  -5   3  592.84   28.10
   4  -4  -3 5264.37  184.98
   4  -4  -3 5326.67  185.28
   4  -3  -3 1515.55   55.59
  -4   3  -3 1482.65   55.39
  -4   3  -3 1507.35   53.69
   4  -3  -3 1462.55   55.39
  -4   3   3 1509.45   54.89
  -4   3   3 1455.05   53.99
   4  -3   3 1510.25   56.79
  -4   3   3 1477.65   55.39
  -4   2  -3  268.07   12.00
   4  -2  -3  258.77   13.30
  -4   2  -3  270.97   13.70
   4  -2  -3  280.07   13.30
  -4   2   3  254.07   12.90
  -4   2   3  270.67   12.60
  -4   2   3  253.77   11.90
   4  -1  -3  121.29    6.80
  -4   1  -3  112.79    8.40
   4  -1  -3  110.09    7.60
  -4   1   3  111.89    7.10
  -4   1   3  121.39    6.70
   4   0  -3    1.60    1.80
   4   1  -3  132.79    7.10
   4   1  -3  106.39    6.10
   4   1  -3  124.19    6.80
  -4  -2   3  257.47   13.00
  -4  -3   3 1690.33   63.09
  -4  -4   3 5662.03  197.28
  -4  -5   3  531.15   27.80
  -4  -5   3  588.74   25.40
  -4  -5   3  550.14   26.80
  -4  -5   3  540.95   24.70
   4   5   3  598.34   26.30
  -4  -6  -3  166.28   12.60
  -4  -6  -3  175.38   13.90
   4   6   3  167.78   11.50
  -4  -6   3  174.88   16.20
  -4  -6   3  183.18   13.20
  -4  -6   3  181.68   12.20
   4   6   3  174.08   12.40
  -4  -6   3  206.08   13.90
  -4  -6   3  170.18   15.50
  -4  -6   3  215.68   14.80
   4   6   3  172.58   10.80
  -4  -6   3  201.18   17.90
  -4  -6   3  177.38   12.00
  -4  -6   3  178.38   14.20
  -4  -6   3  157.88   12.70
  -4  -6   3  171.88   11.30
  -4  -7  -3    7.00    4.10
  -4  -7   3   12.80    5.30
   4   7   3    8.30    4.10
  -4  -7   3    8.40    5.50
   4   7   3   12.80    5.60
  -4  -7   3   10.00    4.50
  -4  -7   3    6.40    3.60
   4   7   3    9.50    4.00
  -4  -7   3   10.80    4.20
  -4  -7   3    8.20    4.80
   4   7   3    7.40    3.80
  -4  -7   3    4.40    3.60
  -4  -7   3   11.50    4.60
  -4  -7   3    7.30    3.10
  -4  -7   3    7.00    5.10
  -4  -7   3    7.60    6.30
   4   7   3    3.90    3.00
  -4  -7   3   11.40    4.30
  -4  -7   3    6.00    3.80
  -4  -7   3    9.20    4.90
  -4  -8  -3  763.42   34.20
  -4  -8  -3  805.82   39.20
  -4  -8  -3  711.93   37.50
  -4  -8   3  696.83   39.10
  -4  -8   3  752.92   36.70
  -4  -8   3  761.32   41.30
  -4  -8   3  755.52   36.40
  -4  -8   3  790.42   36.60
  -4  -8   3  817.52   38.60
  -4  -8   3  740.53   34.50
   4   8   3  796.72   39.40
   4   8   3  780.22   39.50
  -4  -8   3  812.92   41.80
  -4  -8   3  679.13   34.00
   4   8   3  771.02   35.30
  -4  -8   3  884.51   52.99
  -4  -9  -3  160.48   16.40
  -4  -9  -3  163.68   21.50
  -4  -9  -3  157.38   15.70
  -4  -9  -3  141.19   10.90
   4   9   3  159.68   12.50
  -4  -9   3  147.29   15.50
  -4  -9   3  111.09   17.40
   4   9   3  134.89   12.60
  -4  -9   3  150.88   13.10
   4   9   3  136.89   13.00
  -4  -9   3  180.28   18.10
  -4  -9   3  151.78   12.90
  -4 -10  -3  214.18   20.60
  -4 -10  -3  216.48   18.60
  -4 -10   3  208.88   18.30
   4  10   3  199.08   14.90
   4  10   3  214.28   14.20
  -4 -10   3  211.68   19.30
   4  10   3  207.78   13.40
  -4 -11  -3  158.58   15.70
  -4 -11   3  162.18   13.70
   4  11   3  164.08   11.30
   4  11   3  168.68   11.10
  -4 -12  -3   63.49    9.90
   4  12   3   68.79    6.00
   4  12   3   71.09    7.20
  -4  12   4  302.67   17.00
  -4  12   4  292.67   14.70
   4 -12   4  274.77   15.20
  -4  11   4   57.49    7.60
  -4  11   4   65.99    7.80
   4 -11   4   62.39    9.10
   4 -11   4   48.50   12.50
   4 -10  -4  194.48   15.60
   4 -10  -4  172.98   12.10
   4 -10   4  159.08   14.40
  -4  10   4  173.08   13.80
   4 -10   4  157.88   14.00
  -4  10   4  172.98   12.00
  -4  10   4  167.28   12.90
   4  -9  -4    8.40    4.90
   4  -9  -4   23.30    7.80
   4  -9   4    4.90    5.40
  -4   9   4   21.30    7.10
  -4   9   4   12.90    5.00
   4  -9   4   27.80    7.90
   4  -9   4   21.30    7.20
  -4   9   4   22.80    7.10
   4  -9   4   23.40    9.10
  -4   9   4   12.50    5.00
   4  -8  -4    9.40    5.10
   4  -8  -4    1.40    3.00
   4  -8   4   -1.90    4.90
   4  -8   4   -1.60    2.80
  -4   8   4    2.00    4.10
  -4   8   4    5.20    4.00
  -4   8   4    4.70    3.80
   4  -8   4    4.40    4.50
   4  -8   4    1.60    4.40
  -4   8   4    1.10    2.80
   4  -8   4   -2.60    3.10
   4  -7  -4   10.20    5.00
   4  -7  -4   -1.20    3.10
   4  -7  -4    5.00    3.60
   4  -7   4   14.80    6.50
   4  -7   4    8.20    5.00
   4  -7   4    7.40    5.00
   4  -7   4    2.70    3.60
  -4   7   4   -1.10    2.00
  -4   7   4    4.00    4.40
   4  -7   4    3.90    3.10
  -4   7   4    3.90    3.40
  -4   7   4    3.30    3.60
   4  -6  -4  425.56   23.90
   4  -6  -4  406.66   24.20
   4  -6  -4  426.06   24.30
   4  -6   4  417.76   23.30
  -4   6   4  403.16   21.30
  -4   6   4  415.46   22.20
   4  -6   4  390.36   22.00
  -4   6   4  397.36   22.30
   4  -6   4  405.46   23.00
   4  -6   4  433.96   23.00
   4  -6   4  424.66   24.70
   4  -6   4  446.96   24.10
   4  -5  -4   28.50    6.50
  -4   5   4   27.20    4.80
   4  -5   4   29.10    9.60
  -4   5   4   15.50    4.70
  -4   5   4   21.70    5.50
   4  -4  -4 1561.74   60.19
  -4   4  -4 1572.74   59.39
   4  -4  -4 1463.55   59.89
  -4   4  -4 1600.14   57.29
   4  -4  -4 1540.45   59.09
  -4   4   4 1584.14   60.49
   4  -4   4 1656.03   62.09
  -4   4   4 1605.44   59.09
   4  -3  -4  283.57   14.30
   4  -3  -4  271.67   15.40
   4  -3  -4  323.07   15.90
   4  -3  -4  284.17   14.00
  -4   3   4  324.07   14.90
  -4   3   4  288.37   13.70
  -4   3   4  311.47   15.70
   4  -3   4  294.17   16.20
   4  -2  -4   75.89    6.90
   4  -2  -4   70.79    6.60
  -4   2  -4   69.49    5.50
  -4   2   4   66.39    5.80
  -4   2   4   57.59    6.00
  -4   2   4   74.09    5.10
   4  -1  -4  151.58    9.50
  -4   1   4  141.49    8.60
  -4   1   4  139.09    7.90
  -4   0   4 3979.50  153.78
   4   1  -4  130.59    8.10
   4   1  -4  137.99    9.10
   4   1  -4  153.58    8.20
  -4  -2   4   98.29   16.10
  -4  -2   4  100.29   14.90
  -4  -3   4  321.67   16.10
  -4  -4   4 1658.13   62.19
  -4  -5   4   20.10    5.10
  -4  -5   4   20.50    5.00
  -4  -5   4   22.30    5.90
  -4  -6   4  463.55   29.00
  -4  -6   4  461.65   24.80
  -4  -6   4  438.36   21.70
  -4  -6   4  435.56   23.80
  -4  -6   4  376.96   26.10
  -4  -6   4  428.86   21.30
  -4  -6   4  452.55   23.90
  -4  -6   4  452.65   23.30
  -4  -6   4  432.46   27.70
  -4  -6   4  467.85   30.20
  -4  -6   4  405.56   21.70
  -4  -6   4  422.26   20.80
  -4  -7  -4    5.20    4.90
  -4  -7  -4   -0.40    3.10
  -4  -7   4   -0.40    2.60
  -4  -7   4    8.50    4.30
   4   7   4    1.40    2.30
  -4  -7   4    7.40    6.30
   4   7   4    0.90    3.40
  -4  -7   4    6.50    3.50
  -4  -7   4    2.80    4.70
  -4  -7   4   11.20    4.50
  -4  -7   4    5.10    3.10
  -4  -7   4    4.60    3.70
  -4  -7   4    3.80    4.10
  -4  -7   4    5.00    4.20
   4   7   4    7.10    3.50
  -4  -7   4    4.10    4.20
  -4  -7   4    3.70    3.20
  -4  -7   4    4.30    3.30
  -4  -7   4   -0.80    3.60
  -4  -7   4    3.10    2.60
  -4  -8  -4    4.00    4.50
  -4  -8  -4   -0.50    4.30
  -4  -8   4    4.40    4.90
  -4  -8   4    1.60    5.50
  -4  -8   4    7.00    5.10
  -4  -8   4    8.60    4.30
  -4  -8   4    0.70    5.60
   4   8   4    4.90    3.50
  -4  -8   4    6.40    5.00
  -4  -8   4    7.50    4.20
  -4  -8   4   14.10    6.00
  -4  -8   4    3.50    4.70
  -4  -8   4    2.30    3.00
  -4  -8   4   -0.60    2.20
   4   8   4    5.70    3.50
  -4  -8   4    0.70    3.50
   4   8   4    2.30    3.30
  -4  -9  -4   17.50    7.30
  -4  -9  -4   11.30    4.70
  -4  -9  -4   11.40    8.40
  -4  -9  -4   10.80    5.70
  -4  -9   4   11.40    5.30
   4   9   4   25.40    6.10
  -4  -9   4   20.30    8.20
   4   9   4   14.90    5.40
  -4  -9   4   18.70    6.60
  -4  -9   4   11.20    5.80
  -4  -9   4   26.60    6.70
  -4  -9   4   16.10    6.10
  -4  -9   4    9.60    7.00
   4   9   4   13.00    5.40
  -4 -10  -4  161.48   20.00
  -4 -10  -4  156.28   15.70
  -4 -10   4  179.98   17.30
  -4 -10   4  181.78   16.20
   4  10   4  173.88   12.10
   4  10   4  168.58   13.10
   4  10   4  166.28   12.30
  -4 -11  -4   42.90   10.30
  -4 -11  -4   45.00    9.50
   4  11   4   59.89    7.40
   4  11   4   66.09    7.00
  -4 -11   4   71.89   10.80
   4  11   4   68.29    9.40
   4  11   4   56.99    7.20
  -4 -12  -4  286.97   16.00
  -4 -12  -4  254.57   16.40
   4  12   4  259.37   13.70
   4  12   4  245.08   12.80
   4 -11  -5    2.60    4.50
  -4  11   5    1.50    3.40
   4 -11   5    3.90    4.30
  -4  11   5    1.50    2.80
   4 -11   5    4.00    4.30
  -4  11   5    1.20    3.70
   4 -10  -5  346.17   18.80
   4 -10  -5  336.67   21.10
   4 -10   5  350.46   20.60
   4 -10   5  333.17   20.50
  -4  10   5  335.67   17.90
  -4  10   5  358.56   19.70
   4  -9  -5  104.49   12.40
   4  -9   5   88.29   13.10
  -4   9   5  108.89    9.60
  -4   9   5   83.49   10.90
   4  -9   5  138.09   15.30
   4  -9   5   93.39   13.10
   4  -8  -5   96.39   12.80
   4  -8   5  134.69   15.60
   4  -8   5  137.79   13.60
  -4   8   5  129.99   12.90
   4  -8   5  142.29   16.30
   4  -8   5  178.48   14.70
   4  -8   5  142.29   19.30
  -4   8   5  128.19   10.70
  -4   8   5  119.99   14.70
  -4   8   5  126.59   12.10
   4  -7  -5   72.99   11.60
   4  -7  -5   65.59   10.40
   4  -7   5   79.09   10.80
   4  -7   5   63.99    9.70
   4  -7   5   88.59   12.10
   4  -7   5   60.99   15.00
   4  -7   5   65.69   11.20
  -4   7   5   84.39   10.20
  -4   7   5   72.59   10.30
   4  -7   5   68.49   11.30
  -4   7   5   64.99   10.80
   4  -6  -5   98.59   13.40
   4  -6  -5   56.99   10.20
   4  -6   5   79.59    9.80
  -4   6   5   65.89    9.70
   4  -6   5   72.29   10.80
   4  -6   5   59.39   11.10
   4  -6   5   60.29    9.70
   4  -6   5   67.59   10.20
   4  -6   5   85.29   11.60
  -4   6   5   84.99   10.70
   4  -5  -5  228.48   17.10
   4  -5  -5  243.68   14.50
  -4   5  -5  247.58   13.20
   4  -5  -5  239.88   16.20
  -4   5  -5  242.78   14.60
   4  -5   5  236.48   17.80
   4  -5   5  243.68   16.50
   4  -5   5  239.38   17.00
  -4   5   5  258.57   13.70
   4  -5   5  260.77   16.60
  -4   5   5  241.48   16.00
   4  -5   5  262.67   17.70
  -4   5   5  279.37   16.20
   4  -5   5  237.58   20.60
  -4   4  -5 1426.36   53.59
   4  -4  -5 1515.25   57.79
  -4   4  -5 1438.16   56.59
   4  -4  -5 1413.06   57.39
   4  -4  -5 1445.96   56.89
  -4   4   5 1423.26   53.99
   4  -4   5 1543.65   58.89
  -4   4   5 1383.86   57.19
   4  -3  -5  739.73   31.70
   4  -3  -5  696.93   28.80
   4  -3  -5  739.93   31.70
  -4   3   5  678.93   28.10
   4  -2  -5 1838.12   69.49
   4  -2  -5 1785.72   65.69
  -4   2  -5 1731.73   64.99
   4  -2  -5 1788.92   67.79
  -4   2   5 1715.73   66.69
  -4   2   5 1855.51   65.09
   4  -1  -5   39.70    6.00
   4  -1  -5   36.80    6.40
   4  -1  -5   56.09    7.50
   4   0  -5    1.40    2.60
   4   0  -5    0.40    2.30
   4   1  -5   40.00    6.40
   4   1  -5   45.10    5.20
   4   1  -5   46.70    6.00
   4   2  -5 2082.59   73.79
   4   2  -5 1896.51   70.89
  -4  -2   5 1934.31   72.69
   4   3  -5  839.42   33.60
  -4  -3   5  731.43   32.20
  -4  -3   5  786.92   32.60
  -4  -4   5 1663.83   64.59
  -4  -4   5 1636.94   61.99
  -4  -4   5 1613.54   62.09
  -4  -5   5  275.97   17.60
  -4  -5   5  303.87   17.70
  -4  -5   5  224.98   15.60
  -4  -5   5  259.17   16.20
  -4  -5   5  242.88   19.50
  -4  -5   5  262.37   14.80
  -4  -5   5  276.97   24.40
  -4  -5   5  256.27   14.80
  -4  -6   5   90.59   12.00
  -4  -6   5   88.69   11.40
  -4  -6   5   94.49    8.50
  -4  -6   5   73.79   10.00
  -4  -6   5   90.19   15.00
  -4  -6   5   90.69   14.60
  -4  -6   5  101.09   10.00
  -4  -6   5   82.99    8.00
  -4  -6   5   88.19   12.10
  -4  -6   5   82.59    8.30
  -4  -6   5   82.39   14.30
  -4  -6   5   82.19   11.30
   4   7  -5   82.69   10.50
  -4  -7   5   69.79   13.00
  -4  -7   5   66.69    9.10
  -4  -7   5   72.89   11.60
  -4  -7   5   56.69    9.50
  -4  -7   5   63.19   10.10
  -4  -7   5   90.19   19.80
  -4  -7   5   51.79    7.90
  -4  -7   5   65.19   13.30
  -4  -7   5   75.39   11.20
  -4  -7   5   67.39   11.10
  -4  -8  -5  140.89   13.90
  -4  -8  -5  150.78   13.10
  -4  -8   5  134.69   12.60
  -4  -8   5  121.89   10.40
  -4  -8   5  125.59   12.60
  -4  -8   5  131.49   12.30
  -4  -8   5  146.09   13.90
   4   8   5  116.99   11.00
  -4  -8   5  143.99   13.20
  -4  -8   5  134.49   15.30
  -4  -8   5  120.39   11.20
   4   8   5  127.69   11.50
   4   8   5  127.89   12.50
  -4  -8   5  135.69   19.30
  -4  -8   5  113.99   17.00
  -4  -9  -5   78.39   12.00
  -4  -9  -5   88.59   10.90
  -4  -9   5   86.09   11.70
  -4  -9   5   98.59   12.80
  -4  -9   5   71.99   10.50
  -4  -9   5   71.79   13.20
   4   9   5  102.39   10.00
  -4  -9   5  101.89   12.00
  -4  -9   5  101.99   15.30
  -4  -9   5  107.89   13.80
  -4 -10  -5  311.87   23.10
  -4 -10  -5  342.67   22.00
   4  10   5  324.67   18.10
  -4 -10   5  296.67   24.10
  -4 -10   5  324.87   21.40
  -4 -11  -5    6.60    5.10
  -4 -11  -5    0.70    5.20
   4  11   5    0.70    2.40
   4  11   5   -0.40    3.60
   4 -11  -6   21.50    5.70
  -4  11   6   25.50    4.60
   4 -11   6   30.30    6.10
  -4  11   6   34.60    5.70
   4 -11   6   28.60    8.30
   4 -11   6   28.40    5.50
   4 -10  -6   93.69   12.00
   4 -10  -6  110.39    9.70
  -4  10   6   98.59    9.80
   4 -10   6   86.19   11.80
  -4  10   6  125.49    9.60
  -4  10   6  101.29    9.70
   4 -10   6   89.79   11.10
   4 -10   6  107.39   12.80
   4  -9  -6    1.80    3.10
  -4   9   6    2.20    3.50
   4  -9   6    0.30    5.00
   4  -9   6    7.50    5.00
   4  -9   6    1.90    4.60
  -4   9   6   21.70    6.10
   4  -8  -6   22.90    7.00
   4  -8   6   18.30    7.20
  -4   8   6   21.60    6.60
  -4   8   6   14.80    7.30
   4  -8   6   26.70    7.90
   4  -8   6   16.30    7.90
  -4   8   6   16.30    5.20
   4  -8   6   22.40    6.50
  -4   8   6   24.20    5.90
   4  -8   6   18.60    6.40
   4  -7  -6  208.18   17.40
   4  -7  -6  241.88   18.20
  -4   7   6  211.28   13.40
   4  -7   6  230.48   16.20
   4  -7   6  204.18   17.00
   4  -7   6  249.48   15.30
   4  -7   6  204.28   16.80
   4  -7   6  210.88   18.50
   4  -7   6  220.78   16.80
  -4   7   6  229.38   15.80
  -4   7   6  208.98   16.90
   4  -6  -6  306.17   20.80
   4  -6  -6  338.07   23.20
   4  -6  -6  306.37   16.30
  -4   6   6  332.47   16.70
  -4   6   6  303.37   18.50
   4  -6   6  305.27   21.50
   4  -6   6  322.77   20.90
  -4   6   6  276.47   19.40
   4  -6   6  286.27   19.40
   4  -5  -6   74.99   11.40
   4  -5  -6   79.99    9.70
  -4   5  -6  102.09   10.20
  -4   5  -6   67.49    7.10
   4  -5  -6  102.19   13.10
   4  -5   6   74.39   10.50
  -4   5   6   87.39   10.60
   4  -5   6   71.19   10.60
   4  -5   6   90.29   12.90
  -4   5   6  100.09   12.60
   4  -5   6   83.79   10.90
   4  -5   6   73.29   11.30
   4  -5   6   67.79   10.30
   4  -5   6   87.69   12.20
   4  -4  -6  733.83   34.30
   4  -4  -6  731.03   48.30
  -4   4  -6  736.43   34.10
   4  -4  -6  747.83   33.40
  -4   4  -6  743.43   30.80
   4  -4  -6  726.53   30.70
   4  -4  -6  768.82   35.00
   4  -4  -6  757.42   33.20
   4  -4   6  754.12   34.60
  -4   4   6  714.83   32.20
   4  -4   6  801.52   36.20
   4  -4   6  758.22   35.40
   4  -4   6  738.23   41.60
   4  -4   6  771.72   33.20
   4  -4   6  682.63   33.30
  -4   4   6  797.02   33.40
   4  -4   6  724.73   34.20
   4  -3  -6   12.20    4.80
   4  -3  -6   13.30    4.40
   4  -3  -6   12.70    4.60
   4  -3  -6    9.00    4.10
   4  -3  -6   23.50    5.10
  -4   3   6   19.60    4.70
   4  -2  -6    0.80    3.20
  -4   2  -6    2.70    3.70
   4  -2  -6   -1.00    3.20
  -4   2   6    1.20    2.40
   4  -1  -6    9.80    4.70
   4  -1  -6   11.10    4.30
   4   0  -6 4463.15  155.98
   4   0  -6 4447.96  157.18
   4   0  -6 4277.17  154.68
   4   1  -6   23.10    5.80
   4   1  -6   17.90    4.30
   4   1  -6   15.50    3.80
   4   1  -6    9.90    3.60
   4   2  -6    2.40    2.80
   4   2  -6    2.70    3.20
  -4  -2   6    4.50    2.90
   4   3  -6   11.10    5.40
  -4  -3   6   10.50    3.60
  -4  -3   6   11.00    6.20
  -4  -3   6    8.60    4.70
  -4  -3   6   13.30    4.80
  -4  -3   6   11.10    3.90
  -4  -3   6   14.00    4.90
  -4  -3   6   15.80    6.20
  -4  -3   6    4.80    3.20
   4   4  -6  819.02   36.40
  -4  -4   6  881.01   38.80
  -4  -4   6  850.01   37.90
  -4  -4   6  865.11   39.40
  -4  -4   6  832.52   36.90
  -4  -4   6  886.91   44.30
  -4  -4   6  814.42   38.00
  -4  -4   6  791.72   41.40
  -4  -4   6  817.92   35.20
  -4  -4   6  819.42   35.00
  -4  -4   6  788.72   45.30
   4   5  -6   78.09   10.20
  -4  -5   6  118.29   10.50
  -4  -5   6   85.69   11.20
  -4  -5   6   86.29   10.80
  -4  -5   6   97.09   12.50
  -4  -5   6   93.19   12.40
  -4  -5   6   80.59   13.90
  -4  -5   6   84.09    8.20
  -4  -5   6   79.19    7.80
  -4  -5   6   74.69   12.90
  -4  -5   6   72.19   13.00
  -4  -5   6  104.69   13.00
   4   6  -6  347.07   20.10
  -4  -6   6  382.56   21.00
  -4  -6   6  371.36   29.00
  -4  -6   6  362.86   25.90
  -4  -6   6  374.46   26.30
  -4  -6   6  384.76   27.30
  -4  -6   6  365.26   21.80
  -4  -6   6  339.07   18.60
  -4  -6   6  376.06   32.20
  -4  -6   6  330.47   22.30
  -4  -6   6  338.97   24.70
  -4  -6   6  329.07   18.50
  -4  -6   6  377.16   22.30
   4   7  -6  224.28   18.30
   4   7  -6  200.08   15.60
  -4  -7   6  229.78   17.20
  -4  -7   6  207.48   15.90
  -4  -7   6  247.18   20.60
  -4  -7   6  240.68   15.20
  -4  -7   6  243.38   21.10
  -4  -7   6  209.58   16.80
  -4  -7   6  234.78   20.60
  -4  -7   6  205.78   16.60
  -4  -7   6  226.28   17.00
  -4  -8  -6   21.80    6.40
  -4  -8   6   32.60    9.10
  -4  -8   6   25.50    6.80
  -4  -8   6   21.80    6.90
  -4  -8   6   17.60    6.40
  -4  -8   6   32.50    9.50
  -4  -8   6   17.20    5.20
  -4  -8   6   23.10    5.90
  -4  -8   6   26.40    7.20
  -4  -8   6   24.10    7.80
  -4  -9  -6    6.30    5.00
  -4  -9   6    8.10    3.80
  -4  -9   6   19.00    7.50
  -4  -9   6    0.90    3.70
  -4  -9   6   11.70    6.00
   4   9   6   12.00    4.30
  -4  -9   6   24.10    7.40
  -4  -9   6    1.40    4.70
  -4  -9   6   12.20    5.30
  -4  -9   6   10.70    5.40
  -4 -10  -6   79.59   13.80
  -4 -10  -6  111.69    8.60
   4  10   6  101.49    9.00
  -4 -11  -6   29.50    6.60
   4  11   6   29.10    4.80
   4 -10  -7   36.20    7.40
   4 -10  -7   33.80    6.20
   4 -10   7   49.40    7.90
  -4  10   7   42.20    6.10
   4 -10   7   56.99    8.60
   4 -10   7   40.10    6.50
  -4  10   7   59.69    7.10
   4  -9  -7    6.80    4.70
   4  -9   7    9.50    4.60
   4  -9   7   -0.40    3.50
  -4   9   7    1.60    3.20
   4  -9   7    3.70    4.60
   4  -8  -7  964.50   44.40
   4  -8   7  948.51   43.90
  -4   8   7  996.00   40.50
   4  -8   7  918.21   42.90
   4  -8   7  937.81   41.40
  -4   8   7  828.32   57.49
  -4   8   7  948.41   40.70
   4  -8   7  920.61   42.50
  -4   8   7  952.80   41.60
   4  -7  -7  194.98   17.30
   4  -7   7  206.88   16.10
   4  -7   7  165.88   13.40
  -4   7   7  228.28   18.20
   4  -7   7  212.38   16.90
   4  -7   7  180.98   16.00
   4  -7   7  192.48   15.00
  -4   7   7  206.88   14.60
   4  -6  -7  165.48   15.60
   4  -6  -7  141.19   10.80
   4  -6  -7  155.38   15.10
   4  -6   7  162.98   13.40
   4  -6   7  164.68   14.40
   4  -6   7  154.78   15.00
   4  -6   7  171.08   15.10
  -4   6   7  149.99   12.20
   4  -6   7  154.38   13.50
   4  -6   7  165.48   13.80
   4  -6   7  163.38   12.80
   4  -5  -7   61.69   11.40
  -4   5  -7   56.09   10.30
   4  -5  -7   71.79   10.50
   4  -5  -7   65.79    9.40
  -4   5  -7   53.29    7.20
   4  -5  -7   65.79   11.70
   4  -5   7   44.30    9.20
   4  -5   7   66.89   12.60
  -4   5   7   60.79    8.70
   4  -5   7   63.09    9.80
   4  -5   7   69.79   11.80
   4  -5   7   70.39   11.20
   4  -5   7   48.00    9.70
   4  -4  -7 2123.79   81.09
   4  -4  -7 2020.00   83.29
   4  -4  -7 1943.01   85.79
   4  -4  -7 2025.80   80.29
  -4   4  -7 2139.39   78.29
  -4   4  -7 2146.49   83.29
   4  -4  -7 2165.58   83.59
  -4   4   7 1904.11   79.19
   4  -4   7 2206.88   83.99
   4  -4   7 2166.68   81.49
   4  -4   7 2157.58   82.39
  -4   4   7 2165.58   79.39
   4  -4   7 2230.88   82.69
   4  -4   7 2073.99   80.39
   4  -4   7 2235.38   84.49
   4  -4   7 2103.39   80.39
   4  -3  -7  284.27   26.20
   4  -3  -7  339.27   18.80
   4  -3  -7  309.57   16.50
   4  -3  -7  323.87   20.00
  -4   3   7  306.77   16.40
   4  -2  -7   34.90    6.70
   4  -2  -7   18.50    5.80
   4  -2  -7   16.20    6.60
   4  -2  -7   41.70    8.50
   4  -1  -7  376.26   20.80
   4  -1  -7  399.76   22.10
   4  -1  -7  386.06   21.50
  -4   1   7  406.06   25.40
   4   0  -7   -1.40    2.60
   4   0  -7   -3.70    2.40
  -4   0   7    9.70    5.20
  -4   0   7    5.20    3.50
  -4   0   7    2.30    3.10
  -4   0   7    1.90    3.50
   4   1  -7  433.86   20.90
   4   1  -7  438.16   19.90
   4   1  -7  448.66   23.30
   4   1  -7  438.06   26.20
  -4  -1   7  405.46   21.30
  -4  -1   7  403.26   23.70
  -4  -1   7  482.95   29.30
  -4  -1   7  487.15   28.10
  -4  -1   7  384.16   22.10
  -4  -1   7  402.46   23.40
   4   2  -7   36.00    6.00
   4   2  -7   18.30    5.80
   4   2  -7   35.50    5.70
   4   2  -7   31.40    6.00
  -4  -2   7   43.10    9.80
  -4  -2   7   30.90    7.40
  -4  -2   7   35.30    7.70
  -4  -2   7   52.79   11.20
  -4  -2   7   40.40    7.70
  -4  -2   7   40.10    7.10
  -4  -2   7   30.10    6.20
  -4  -2   7   31.20    6.30
  -4  -2   7   33.20    7.20
   4   3  -7  378.66   18.70
   4   3  -7  384.56   21.10
  -4  -3   7  361.16   25.80
  -4  -3   7  341.57   18.90
  -4  -3   7  407.56   22.60
  -4  -3   7  353.66   20.90
  -4  -3   7  350.56   24.90
  -4  -3   7  359.16   19.10
  -4  -3   7  370.36   21.00
  -4  -3   7  374.26   22.30
  -4  -3   7  365.16   22.80
   4   4  -7 2400.06   90.39
  -4  -4   7 2379.86   93.69
  -4  -4   7 2264.07   96.79
  -4  -4   7 2393.16   99.29
  -4  -4   7 2459.55   88.59
  -4  -4   7 2462.35   92.59
  -4  -4   7 2406.86   91.59
  -4  -4   7 2224.48   88.39
  -4  -4   7 2450.95   91.99
  -4  -4   7 2281.17   87.59
  -4  -4   7 2341.97   90.29
   4   5  -7   49.20    8.60
   4   5  -7   53.29   11.50
  -4  -5   7   74.79   10.60
  -4  -5   7   67.59    8.90
  -4  -5   7   64.69   11.20
  -4  -5   7   64.49   13.00
  -4  -5   7   67.79   11.30
  -4  -5   7   55.89    8.80
  -4  -5   7   68.79   10.80
  -4  -5   7   70.69   10.40
  -4  -5   7   64.99   13.20
  -4  -5   7   66.19   12.90
   4   6  -7  138.49   14.80
   4   6  -7  143.89   12.70
  -4  -6   7  144.89   11.20
  -4  -6   7  210.18   19.10
  -4  -6   7  154.38   14.90
  -4  -6   7  180.68   15.00
  -4  -6   7  177.98   14.90
  -4  -6   7  171.08   13.50
  -4  -6   7  167.18   13.60
  -4  -6   7  171.58   17.10
  -4  -6   7  133.19   12.90
  -4  -6   7  158.68   14.60
  -4  -6   7  163.58   11.90
  -4  -6   7  177.28   18.10
  -4  -6   7  181.78   14.80
  -4  -7   7  196.48   16.00
  -4  -7   7  199.28   16.20
  -4  -7   7  208.28   19.20
  -4  -7   7  204.18   18.90
  -4  -7   7  233.28   17.00
  -4  -7   7  212.68   15.60
  -4  -7   7  186.28   17.70
  -4  -7   7  179.48   15.40
  -4  -7   7  199.18   14.00
  -4  -8   7  986.40   43.90
  -4  -8   7  974.60   44.30
  -4  -8   7  961.60   46.10
  -4  -8   7  946.31   46.90
  -4  -8   7  928.61   42.60
  -4  -8   7  990.90   43.30
  -4  -8   7  929.71   42.00
  -4  -8   7  963.40   39.80
  -4  -9  -7    3.00    3.70
  -4  -9   7   15.30    6.10
  -4  -9   7    3.40    4.10
  -4  -9   7    0.40    3.60
  -4  -9   7    9.70    4.60
  -4  -9   7    6.10    4.30
  -4  -9   7    8.40    3.60
  -4 -10  -7   58.99    7.00
   4  10   7   40.50    6.00
   4 -10  -8  121.39   10.00
   4 -10  -8  123.19    8.80
   4 -10   8  113.49    9.50
  -4  10   8  124.69    7.50
   4  -9  -8    0.70    3.30
   4  -9   8    7.80    4.00
   4  -9   8    2.20    3.50
  -4   9   8   -2.70    1.90
   4  -9   8    1.50    4.30
   4  -8  -8   52.09    9.70
  -4   8   8   41.00   15.20
  -4   8   8   50.59    7.20
   4  -8   8   59.09    9.90
   4  -8   8   70.09    9.50
   4  -8   8   45.10    7.80
   4  -8   8   51.29    9.00
   4  -7  -8  296.77   21.50
   4  -7   8  332.17   20.50
   4  -7   8  332.77   20.60
   4  -7   8  304.17   20.80
  -4   7   8  305.57   17.90
   4  -7   8  329.57   18.60
   4  -7   8  322.37   19.10
   4  -6  -8  731.63   31.80
   4  -6  -8  791.22   39.90
   4  -6   8  735.03   34.40
   4  -6   8  729.53   37.20
  -4   6   8  762.52   33.50
   4  -6   8  718.93   33.80
   4  -6   8  706.03   36.00
   4  -6   8  775.42   36.00
   4  -5  -8  277.77   17.40
  -4   5  -8  284.47   15.80
   4  -5  -8  266.77   21.30
   4  -5  -8  272.57   20.70
   4  -5   8  285.97   18.80
   4  -5   8  248.48   16.80
   4  -5   8  292.67   20.30
   4  -5   8  259.67   17.60
   4  -5   8  269.37   18.70
   4  -5   8  313.77   20.50
  -4   5   8  248.48   15.80
   4  -5   8  294.17   17.70
   4  -4  -8  222.88   19.50
  -4   4  -8  213.08   18.00
   4  -4  -8  216.38   13.20
  -4   4  -8  243.98   21.80
   4  -4  -8  225.28   17.90
   4  -4  -8  223.38   15.80
   4  -4  -8  239.58   18.10
  -4   4  -8  208.68   13.50
   4  -4   8  198.98   15.30
   4  -4   8  175.78   15.00
   4  -4   8  193.58   16.00
   4  -4   8  227.78   17.30
  -4   4   8  218.38   13.20
   4  -4   8  221.88   15.30
   4  -4   8  191.08   14.50
   4  -3  -8  136.79   13.30
   4  -3  -8  126.79   12.30
   4  -3  -8  121.59   10.40
   4  -3  -8  140.49   17.60
   4  -2  -8   79.49   10.60
   4  -2  -8   53.89   10.40
   4  -2  -8   64.19   10.20
  -4   2   8   78.79   10.50
   4  -1   8  355.56   22.20
   4  -1   8  327.77   19.70
   4   0  -8 1194.58   49.60
   4   0  -8 1174.98   48.70
   4   0  -8 1196.88   50.79
  -4   0   8 1151.28   49.80
  -4   0   8 1165.98   55.19
  -4   0   8 1109.19   49.70
  -4   0   8 1180.78   51.69
  -4   0   8 1080.79   49.60
  -4   0   8 1139.59   48.00
   4   1  -8  329.77   19.50
   4   1  -8  312.27   16.90
   4   1  -8  308.67   19.10
   4   1  -8  350.46   21.20
  -4  -1   8  342.77   19.60
  -4  -1   8  347.07   21.20
  -4  -1   8  347.97   25.10
  -4  -1   8  337.97   21.10
  -4  -1   8  311.67   19.70
  -4  -1   8  319.27   21.20
   4   2  -8   65.59    9.30
   4   2  -8   75.69   11.60
   4   2  -8   80.49    9.40
   4   2  -8   81.39   13.00
  -4  -2   8   67.29    9.80
  -4  -2   8   75.19   10.20
  -4  -2   8   91.19   12.30
  -4  -2   8   79.19   12.00
  -4  -2   8   70.59   11.20
  -4  -2   8   77.69   13.80
  -4  -2   8   84.69   11.80
   4   3  -8  139.19   15.80
   4   3  -8  134.89   11.00
   4   3  -8  130.89    9.60
   4   3  -8  131.89   12.40
  -4  -3   8  142.79   11.00
  -4  -3   8  155.28   14.40
  -4  -3   8  128.89   12.10
  -4  -3   8  144.89   14.40
  -4  -3   8  138.99   18.00
  -4  -3   8  158.08   18.20
  -4  -3   8  121.59   10.80
   4   4  -8  261.17   21.50
  -4  -4   8  254.27   18.20
  -4  -4   8  277.07   22.90
  -4  -4   8  229.38   16.60
  -4  -4   8  269.97   19.60
  -4  -4   8  245.88   17.30
  -4  -4   8  262.57   21.30
  -4  -4   8  267.07   18.50
  -4  -4   8  286.67   16.40
  -4  -4   8  210.38   16.80
   4   5  -8  310.57   23.30
   4   5  -8  311.67   20.00
  -4  -5   8  302.47   21.50
  -4  -5   8  332.77   19.10
  -4  -5   8  336.27   21.00
  -4  -5   8  358.06   26.30
  -4  -5   8  291.97   22.10
  -4  -5   8  282.77   20.30
  -4  -5   8  335.07   21.00
  -4  -5   8  299.37   19.30
  -4  -5   8  332.67   24.20
  -4  -5   8  319.67   17.60
   4   6  -8  757.52   45.70
  -4  -6   8  797.42   37.70
  -4  -6   8  791.92   38.20
  -4  -6   8  821.42   35.60
  -4  -6   8  724.93   36.40
  -4  -6   8  776.62   38.80
  -4  -6   8  757.72   35.30
  -4  -6   8  769.82   33.60
  -4  -6   8  723.53   40.00
  -4  -6   8  797.72   43.00
  -4  -7   8  337.57   21.30
  -4  -7   8  282.77   22.10
  -4  -7   8  344.87   24.90
  -4  -7   8  340.87   21.10
  -4  -7   8  328.47   21.20
  -4  -7   8  362.56   20.50
  -4  -7   8  353.66   21.50
  -4  -7   8  340.07   19.10
  -4  -8   8   45.70    8.60
  -4  -8   8   46.10    8.10
  -4  -8   8   37.40    7.70
  -4  -8   8   54.69    7.60
  -4  -8   8   57.69   10.00
  -4  -8   8   64.69    8.90
  -4  -8   8   55.89    8.70
  -4  -9   8   -1.30    3.30
  -4  -9   8    1.50    2.30
  -4  -9   8    2.20    3.40
  -4  -9   8    4.60    3.90
   4  10   8  120.49    7.90
   4  -9  -9   26.40    5.50
   4  -9  -9   33.10    6.00
   4  -9   9   33.10    5.90
   4  -9   9   39.90    6.90
   4  -8  -9  156.48   12.90
   4  -8   9  146.49   11.50
   4  -8   9  144.49   10.50
   4  -8   9  163.08   16.50
   4  -8   9  203.38   25.80
   4  -8   9  142.89   12.00
  -4   8   9  143.09    8.90
   4  -7  -9   63.59   10.50
   4  -7   9   43.10    7.90
   4  -7   9   50.39    9.50
  -4   7   9   66.29   10.30
   4  -7   9   48.40    8.10
   4  -7   9   36.50    7.90
  -4   7   9   48.50    6.30
   4  -6  -9    0.90    4.20
   4  -6   9   -2.60    2.50
   4  -6   9    8.00    4.80
  -4   6   9    5.80    2.90
   4  -6   9    7.80    5.90
   4  -6   9    0.10    3.80
   4  -6   9   -0.10    3.60
   4  -5  -9   51.99    8.40
   4  -5  -9   47.20   10.10
   4  -5  -9   67.89   13.30
  -4   5  -9   36.20    7.30
   4  -5  -9   40.00    7.30
   4  -5   9   27.80    7.70
   4  -5   9   47.80    8.40
   4  -5   9   28.50    7.10
   4  -5   9   26.90    7.90
   4  -5   9   38.60    8.00
   4  -5   9   30.30    8.00
  -4   4  -9  120.89   14.30
  -4   4  -9  125.79   14.00
   4  -4  -9  118.69   11.70
  -4   4  -9  109.29   11.50
   4  -4  -9   90.79   14.70
   4  -4  -9  137.89   17.70
  -4   4  -9  129.09   10.30
   4  -4   9  124.19   11.80
   4  -4   9  117.09   11.00
   4  -4   9  125.59   10.90
   4  -4   9  124.09   13.80
   4  -4   9  135.29   16.40
  -4   4   9  132.59   12.00
   4  -4   9   91.49   13.20
   4  -3  -9    4.20    4.50
   4  -3  -9   13.40    6.90
   4  -3  -9   16.70    7.30
   4  -3  -9    7.50    5.20
  -4   3  -9   23.00    6.10
   4  -3   9   10.80    5.70
  -4   3   9   13.30    5.50
   4  -3   9    3.80    3.60
   4  -3   9   15.80    6.40
   4  -2   9 1525.25   64.29
   4  -2   9 1470.75   61.49
   4  -1   9    9.50    4.30
   4   0  -9    3.00    3.50
   4   0  -9    3.60    4.00
   4   0  -9    0.50    3.80
  -4   0   9    6.30    4.60
  -4   0   9    4.80    4.80
  -4   0   9    1.60    3.70
  -4   0   9    2.00    4.10
  -4   0   9    2.40    3.20
  -4   0   9    0.20    2.20
   4   1  -9   14.00    5.30
   4   1  -9    6.30    6.60
   4   1  -9    3.70    4.30
  -4  -1   9   10.70    4.70
  -4  -1   9    8.20    5.40
  -4  -1   9    6.80    4.20
  -4  -1   9   14.00    5.20
  -4  -1   9    9.90    5.70
  -4  -1   9    8.40    5.10
  -4  -1   9    8.30    4.20
   4   2  -9 1243.08   56.39
   4   2  -9 1371.86   59.09
   4   2  -9 1404.46   57.39
  -4  -2   9 1440.46   60.59
  -4  -2   9 1445.86   60.29
  -4  -2   9 1330.67   58.29
  -4  -2   9 1424.76   56.19
  -4  -2   9 1364.66   58.29
  -4  -2   9 1443.26   65.89
  -4  -2   9 1381.46   57.29
   4   3  -9    6.30    4.20
   4   3  -9   10.90    4.90
   4   3  -9   11.20    4.70
   4   3  -9    6.80    5.90
  -4  -3   9    7.00    4.30
  -4  -3   9    4.60    5.70
  -4  -3   9    9.00    5.90
  -4  -3   9    8.20    5.10
  -4  -3   9   18.10    6.30
  -4  -3   9    5.90    3.40
  -4  -3   9    1.50    3.70
   4   4  -9  125.29   10.50
   4   4  -9  131.49   12.90
   4   4  -9  103.39   17.60
  -4  -4   9  128.59   10.50
  -4  -4   9  121.49   17.80
  -4  -4   9  140.19   12.90
  -4  -4   9  119.89   12.70
  -4  -4   9  128.99   13.40
  -4  -4   9  110.59   14.30
  -4  -4   9  133.69   12.60
   4   5  -9   35.30   11.30
  -4  -5   9   49.40    9.70
  -4  -5   9   39.00    9.90
  -4  -5   9   47.30   11.30
  -4  -5   9   33.60    7.30
  -4  -5   9   39.00    7.20
  -4  -5   9   38.60    8.40
  -4  -5   9   32.00    6.80
  -4  -5   9   28.00    7.30
  -4  -5   9   39.60    8.80
  -4  -6   9    1.40    3.30
  -4  -6   9    0.00    3.90
  -4  -6   9   -1.30    2.80
  -4  -6   9    1.00    3.90
  -4  -6   9    2.50    3.80
  -4  -6   9    5.90    4.50
  -4  -6   9    6.60    3.50
  -4  -6   9   -2.70    3.60
  -4  -7   9   49.50    8.60
  -4  -7   9   38.40    9.00
  -4  -7   9   53.09    9.20
  -4  -7   9   51.49    8.80
  -4  -7   9   37.80    8.10
  -4  -7   9   58.59    9.10
  -4  -7   9   42.10    7.20
  -4  -8   9  150.18   14.60
  -4  -8   9  125.19    9.30
  -4  -8   9  131.89   11.10
  -4  -8   9  125.59   11.40
  -4  -8   9  148.99   11.10
  -4  -9   9   36.90    6.40
  -4  -9   9   22.10    4.70
   4   9   9   38.00    4.70
   4  -8 -10  100.89    9.50
   4  -8  10   87.29    8.50
   4  -8  10   89.29    8.80
   4  -7 -10   19.70    6.10
   4  -7  10   18.50    5.80
   4  -7  10   25.20    5.50
   4  -7  10   21.20    6.10
   4  -6 -10  245.88   23.60
   4  -6  10  247.38   15.60
   4  -6  10  232.58   15.90
   4  -6  10  251.87   14.20
   4  -6  10  222.98   16.20
   4  -5 -10    3.90    3.60
  -4   5 -10   16.00    5.80
   4  -5 -10    1.80    4.70
   4  -5  10   12.00    4.60
   4  -5  10   16.30    6.50
  -4   5  10    9.70    5.30
   4  -5  10    8.50    5.20
   4  -5  10    0.70    3.40
   4  -5  10    9.20    4.30
  -4   4 -10  266.47   16.30
   4  -4 -10  282.77   23.00
   4  -4 -10  256.87   17.20
  -4   4 -10  292.67   18.90
   4  -4  10  297.07   18.20
   4  -4  10  268.37   19.10
   4  -4  10  257.17   15.90
   4  -4  10  281.67   17.00
   4  -4  10  263.67   18.10
   4  -3 -10  137.29   17.80
   4  -3 -10  116.29   11.90
  -4   3 -10  134.09   22.20
   4  -3 -10  123.09   21.90
  -4   3 -10  128.39   12.10
  -4   3 -10  142.89   12.90
   4  -3  10  120.59   12.80
   4  -3  10  139.19   11.40
  -4   3  10  129.19   11.60
   4  -3  10  145.99   12.20
  -4   3  10  153.28   12.90
  -4   3  10  145.59   14.50
  -4   2 -10   35.70    7.70
   4  -2  10   28.50    6.40
   4  -2  10   16.60    8.10
   4  -2  10   21.60    6.80
   4  -1  10    0.80    3.80
   4  -1  10    2.80    4.60
   4  -1  10    7.10    4.00
   4   0 -10  857.21   39.80
   4   0 -10  810.62   40.20
   4   0 -10  875.91   41.20
   4   0 -10  863.21   42.30
  -4   0  10  840.02   38.30
  -4   0  10  873.91   38.20
  -4   0  10  879.31   40.20
  -4   0  10  817.82   39.90
  -4   0  10  858.41   39.60
  -4   0  10  891.41   42.40
   4   1 -10   -2.20    3.70
   4   1 -10    4.60    3.60
   4   1 -10    4.40    4.00
   4   1 -10   -0.10    3.20
  -4  -1  10    1.10    3.90
  -4  -1  10   14.60    6.00
  -4  -1  10    0.70    3.30
  -4  -1  10    2.50    3.40
  -4  -1  10    0.90    4.60
  -4  -1  10   12.80    5.20
  -4  -1  10    6.40    4.40
   4   2 -10   29.80    6.90
   4   2 -10   42.30    7.90
   4   2 -10   36.20    7.60
  -4  -2  10   24.00    6.90
  -4  -2  10   31.30    6.90
  -4  -2  10   27.10    8.10
  -4  -2  10   14.00    5.90
  -4  -2  10   23.70    5.90
  -4  -2  10   31.20    7.80
  -4  -2  10   25.70    6.50
   4   3 -10  163.28   12.90
   4   3 -10  154.68   11.50
   4   3 -10  169.18   17.90
   4   3 -10  134.19   12.20
  -4  -3  10  133.79   13.30
  -4  -3  10  143.19   11.50
  -4  -3  10  157.48   14.30
  -4  -3  10  145.29   13.60
  -4  -3  10  125.69   12.20
  -4  -3  10  154.28   13.20
  -4  -3  10  144.69   16.40
   4   4 -10  281.47   15.50
  -4  -4  10  248.88   18.60
  -4  -4  10  249.08   17.90
  -4  -4  10  274.87   18.00
  -4  -4  10  257.97   18.80
  -4  -4  10  243.98   16.80
  -4  -4  10  293.37   22.90
  -4  -4  10  264.67   15.20
  -4  -5  10   13.60    5.70
  -4  -5  10    8.90    4.60
  -4  -5  10    1.70    5.00
  -4  -5  10   -0.30    3.40
  -4  -5  10    0.10    2.30
  -4  -5  10   15.10    5.10
  -4  -5  10    8.20    4.80
  -4  -5  10    7.80    5.20
  -4  -5  10    6.90    3.90
  -4  -6  10  247.88   16.90
  -4  -6  10  242.48   16.50
  -4  -6  10  271.07   15.90
  -4  -6  10  246.58   17.50
  -4  -6  10  275.17   14.30
  -4  -6  10  272.47   17.00
  -4  -7  10   27.00    5.80
  -4  -7  10   23.60    5.50
  -4  -7  10   14.00    4.50
  -4  -7  10    9.60    4.60
  -4  -7  10   21.60    5.00
  -4  -8  10   86.09    8.20
  -4  -8  10  109.19    9.50
  -4  -8  10  105.49    8.90
   4  -7 -11    8.00    3.80
   4  -7  11    1.70    2.50
   4  -7  11   11.00    4.10
  -4   7  11    1.80    2.60
  -4   6 -11    8.50    4.10
   4  -6 -11    0.50    3.00
  -4   6 -11   22.40    5.80
   4  -6  11    3.50    2.40
  -4   6  11    4.20    3.60
  -4   6  11    6.50    2.70
   4  -6  11    8.40    4.50
   4  -6  11    5.50    3.70
   4  -5 -11   60.89   10.20
   4  -5 -11   51.59    6.70
  -4   5 -11   54.39    7.70
  -4   5 -11   63.09    9.60
  -4   5 -11   54.09    8.40
   4  -5  11   53.69    9.00
  -4   5  11   50.99    9.00
  -4   5  11   37.60    5.90
   4  -5  11   43.40    6.50
  -4   5  11   40.90    7.60
  -4   4 -11  247.58   15.70
  -4   4 -11  237.98   14.40
   4  -4 -11  245.68   15.20
   4  -4  11  248.38   16.40
  -4   4  11  227.48   17.00
  -4   4  11  229.88   15.10
   4  -4  11  220.28   14.50
   4  -4  11  255.97   19.80
   4  -4  11  232.08   16.40
   4  -3 -11   15.40    5.70
  -4   3 -11   22.60    7.60
  -4   3  11   23.00    6.80
  -4   3  11   21.40    5.40
   4  -3  11   22.50    5.20
   4  -3  11   21.50    6.80
  -4   2 -11  279.77   17.70
   4  -2  11  289.67   17.20
   4  -2  11  266.37   19.00
   4  -1  11  306.17   20.60
   4  -1  11  319.87   18.50
   4   0 -11    1.20    4.40
  -4   0  11    2.60    3.60
  -4   0  11    4.90    4.30
  -4   0  11   -1.40    3.70
  -4   0  11    0.10    2.70
  -4   0  11    1.50    3.50
  -4   0  11   12.00    4.50
  -4   0  11   -0.60    3.80
   4   1 -11  325.67   19.70
   4   1 -11  315.27   18.40
  -4  -1  11  372.06   26.20
  -4  -1  11  334.57   20.80
  -4  -1  11  293.07   17.40
  -4  -1  11  346.77   18.90
  -4  -1  11  324.77   19.50
  -4  -1  11  268.77   18.10
  -4  -1  11  342.07   21.70
   4   2 -11  246.58   16.50
  -4  -2  11  249.58   16.90
  -4  -2  11  255.27   17.90
  -4  -2  11  255.87   16.10
  -4  -2  11  244.78   16.50
  -4  -2  11  285.17   16.00
  -4  -2  11  241.28   17.70
   4   3 -11   23.30    6.20
  -4  -3  11   14.50    5.40
  -4  -3  11   26.00    5.60
  -4  -3  11   27.40    6.70
  -4  -3  11   22.00    6.20
  -4  -3  11   15.60    5.90
  -4  -3  11   18.90    5.90
   4   4 -11  276.57   17.30
   4   4 -11  256.57   14.00
  -4  -4  11  201.48   14.40
  -4  -4  11  198.88   15.00
  -4  -4  11  245.78   15.50
  -4  -4  11  228.78   16.50
  -4  -4  11  213.68   15.90
  -4  -5  11   41.40    7.30
  -4  -5  11   35.10    7.10
  -4  -5  11   47.70    6.30
  -4  -5  11   45.70    8.30
  -4  -5  11   41.80    7.10
  -4  -6  11    6.10    3.40
  -4  -6  11    7.70    4.10
  -4  -6  11    7.60    4.00
  -4  -6  11    0.50    2.40
  -4  -6  11    1.00    2.40
  -4  -7  11    3.30    3.10
  -4  -7  11    8.30    3.40
  -4  -7  11    7.50    3.30
  -4  -7  11   10.60    3.00
  -4   5 -12   36.20   10.10
  -4   5 -12   34.50    7.10
   4  -5  12   21.00    4.90
  -4   5  12   14.10    3.90
  -4   5  12   10.50    4.00
   4  -5  12   14.90    4.40
   4  -4 -12   25.20    5.40
  -4   4 -12   54.09    8.50
  -4   4 -12   38.90    6.80
   4  -4  12   24.70    4.40
  -4   4  12   29.30    4.30
  -4   4  12   19.70    5.30
   4  -4  12   28.50    6.40
  -4   4  12   43.00    7.30
   4  -4  12   26.20    5.70
   4  -3 -12   -1.60    3.40
  -4   3 -12    2.00    4.10
   4  -3  12    5.20    3.80
   4  -3  12   -0.50    3.30
   4  -3  12    7.60    4.50
  -4   3  12    3.00    3.20
  -4   3  12   -0.50    3.10
  -4   3  12    8.30    3.10
  -4   2 -12   88.89   10.30
   4  -2  12   79.99   10.70
   4  -2  12   96.19    8.00
  -4   1  12    4.20    4.80
   4  -1  12   13.20    3.60
  -4   1  12    7.10    3.40
   4  -1  12    4.80    4.10
   4   0 -12  113.39   10.70
  -4   0  12  120.09   10.10
  -4   0  12   98.59    9.50
  -4   0  12  119.09   11.40
  -4   0  12  106.49    8.70
  -4   0  12  102.29    9.30
   4   1 -12    4.50    5.50
   4   1 -12   13.20    4.80
  -4  -1  12   -2.20    2.90
  -4  -1  12    4.40    3.50
  -4  -1  12   11.60    4.10
   4   2 -12   85.19    9.80
   4   2 -12   83.99    9.00
  -4  -2  12   79.29    7.60
  -4  -2  12   81.89    8.20
  -4  -2  12   83.39   11.00
  -4  -2  12   85.79    8.50
   4   3 -12    3.30    3.00
  -4  -3  12    6.60    2.80
  -4  -3  12    3.50    3.70
  -4  -3  12    6.10    3.30
  -4  -3  12   -2.80    2.80
  -4  -3  12    3.90    6.60
  -4  -3  12    3.40    4.00
  -4  -3  12    5.60    3.70
   4   4 -12   26.10    4.80
   4   4 -12   35.10    6.00
  -4  -4  12   23.00    5.00
  -4  -4  12   19.50    4.90
  -4  -4  12   20.70    4.90
  -4  -4  12   25.30    5.30
  -4  -4  12   19.40    4.40
  -4  -4  12   32.90    5.90
  -4  -5  12   15.80    4.00
  -4  -5  12    7.90    3.40
  -4  -5  12   14.60    3.50
  -4  -5  12   15.90    4.20
  -4   2 -13  188.78   11.80
   4  -2  13  184.38   12.00
   4  -1 -13   -2.30    2.90
   4  -1  13    4.40    3.50
  -4   1  13    3.10    3.20
   4   0 -13    2.50    3.20
  -4   0  13    5.70    3.30
  -4   0  13    4.50    2.90
  -4   0  13   -0.40    2.80
   4   1 -13    7.60    3.70
  -4  -1  13    0.80    3.00
  -4  -1  13    5.50    2.40
  -4  -1  13    4.20    2.70
   4   2 -13  165.28   10.20
  -4  -2  13  136.89    9.00
  -4  -2  13  200.38   10.70
  -4  -2  13  185.98   11.90
  -5  12   0    9.00    3.20
   5 -12   0   -3.30    3.60
  -5  12   0    3.70    3.60
  -5  12   0    2.40    2.40
  -5  11   0  567.14   27.70
  -5  11   0  622.14   33.30
   5 -11   0  526.45   28.60
  -5  11   0  615.94   25.80
   5 -10   0    2.30    8.40
  -5  10   0   14.20    5.80
  -5  10   0    3.00    4.20
  -5  10   0    2.30    3.50
  -5  10   0    7.40    4.30
   5 -10   0    6.00    5.30
   5 -10   0    5.80    4.80
   5  -9   0  303.07   20.10
  -5   9   0  342.47   17.70
  -5   9   0  291.37   19.60
   5  -9   0  345.07   21.60
  -5   9   0  316.67   18.80
  -5   9   0  314.27   19.50
   5  -8   0   -1.30    3.90
  -5   8   0   12.60    4.30
   5  -8   0    7.70    4.30
  -5   8   0    6.60    5.30
  -5   8   0    7.00    4.30
  -5   8   0    5.70    4.30
   5  -8   0    4.00    4.70
  -5   8   0    8.30    4.20
   5  -7   0   28.30    5.90
   5  -7   0   20.00    6.50
   5  -7   0   23.80    7.80
   5  -7   0   40.80    8.20
  -5   7   0   24.80    5.50
  -5   7   0   25.40    5.70
  -5   7   0   27.40    6.00
  -5   6   0    1.00    2.90
   5  -6   0    3.30    2.40
  -5   6   0    6.20    3.20
  -5   6   0    4.10    3.80
   5  -5   0 1352.96   53.69
  -5   5   0 1248.18   49.20
  -5   5   0 1254.77   49.80
  -5   5   0 1433.66   50.39
  -5   4   0    2.00    2.70
   5  -4   0   -0.60    2.70
  -5   4   0   -0.10    2.80
  -5   4   0    3.50    2.80
   5  -3   0   60.99    5.10
  -5   3   0   66.29    5.90
  -5   3   0   59.39    5.70
   5  -3   0   74.59    6.60
   5  -2   0    4.80    2.10
   5  -2   0    6.00    2.50
   5  -2   0    4.80    2.70
  -5   0   0   77.49    6.00
   5   0   0   70.39    5.20
   5   2   0    5.50    2.40
   5   2   0    6.60    2.30
   5   2   0    6.90    2.30
   5   3   0   83.39    5.80
   5   3   0   75.79    5.40
   5   3   0   70.89    5.10
   5   4   0    2.60    2.30
  -5  -4   0    1.80    2.60
  -5  -5   0 1273.77   52.19
   5   5   0 1382.76   50.29
  -5  -6   0    4.90    3.10
   5   6   0    3.20    2.50
  -5  -6   0    4.60    3.40
  -5  -6   0    8.80    6.00
  -5  -6   0    3.60    3.80
  -5  -6   0    4.10    3.70
  -5  -7   0   39.50    6.70
  -5  -7   0   21.00    6.30
  -5  -7   0   22.70    7.60
   5   7   0   25.50    5.10
  -5  -7   0   46.80   11.20
  -5  -7   0   26.50    6.70
  -5  -7   0   27.30    8.00
  -5  -7   0   32.10    9.60
  -5  -7   0   19.60    6.10
  -5  -8   0    7.70    5.50
   5   8   0    4.00    3.40
  -5  -8   0    5.70    4.00
  -5  -8   0    5.70    5.30
  -5  -8   0    6.50    5.00
  -5  -9   0  337.07   24.00
   5   9   0  327.37   18.20
  -5  -9   0  269.07   22.70
  -5  -9   0  343.57   26.50
  -5  -9   0  344.27   21.80
  -5  -9   0  340.97   24.80
  -5 -10   0    6.40    4.70
  -5 -10   0    0.20    6.20
  -5 -10   0   -2.20    5.80
  -5 -10   0    6.90    4.50
  -5 -11   0  575.34   32.20
  -5 -11   0  552.14   31.50
  -5 -12   0   -0.50    4.40
   5  12   0    3.80    5.30
  -5  12  -1   16.30    4.90
   5 -12  -1   18.40    5.50
  -5  12   1   10.60    4.50
   5 -12   1   16.70    5.40
  -5  12   1   22.70    4.70
  -5  12   1   12.80    3.50
  -5  11  -1   29.30    5.90
   5 -11  -1   29.60    8.00
  -5  11  -1   35.60    7.50
  -5  11  -1   31.40    6.80
   5 -11  -1   26.70    6.60
  -5  11   1   26.20    5.60
  -5  11   1   37.30    7.90
   5 -11   1   24.00    7.00
  -5  11   1   45.20    7.00
  -5  10  -1   26.30    6.00
  -5  10  -1   26.30    7.30
   5 -10  -1   23.70    6.80
  -5  10  -1   24.70    6.90
   5 -10  -1   20.30    6.80
  -5  10   1   24.20    5.90
   5 -10   1   27.40    7.70
  -5  10   1   27.30    7.50
  -5  10   1   30.40    6.60
  -5   9  -1   37.90    9.00
  -5   9  -1   43.70    6.90
   5  -9  -1   45.90    9.50
   5  -9  -1   37.10    6.20
  -5   9  -1   40.10    7.10
   5  -9  -1   29.80    7.80
  -5   9   1   44.70    9.30
   5  -9   1   24.60    7.00
  -5   9   1   39.60    7.80
   5  -9   1   20.20    8.00
  -5   9   1   51.49    7.90
   5  -9   1   35.50    7.90
  -5   9   1   49.60    8.80
   5  -9   1   41.20    9.10
  -5   8  -1  111.69    9.50
   5  -8  -1  102.69    9.80
  -5   8  -1  112.49    9.60
   5  -8   1  102.69   15.90
  -5   8   1   84.99   11.20
  -5   8   1   96.19    9.60
  -5   8   1  101.79   12.20
  -5   8   1   96.79    9.10
   5  -8   1  109.09   14.00
   5  -8   1  100.59   12.60
  -5   8   1  117.09   11.90
   5  -8   1   64.39   10.00
  -5   7  -1  102.09    8.60
   5  -7  -1   90.19   14.10
  -5   7  -1  105.19    9.40
   5  -7  -1   93.09    9.20
   5  -7  -1   73.59   10.80
   5  -7   1  101.59    8.20
  -5   7   1   98.09    9.60
  -5   7   1  100.59    8.50
   5  -7   1  112.69   13.70
   5  -7   1   72.89   12.20
  -5   7   1   89.39   11.70
   5  -7   1  122.19   14.30
  -5   7   1  108.79    9.50
  -5   6  -1  218.98   12.50
   5  -6  -1  223.08   14.30
   5  -6  -1  222.18   16.80
  -5   6  -1  209.88   12.70
   5  -6   1  212.78   14.50
  -5   6   1  222.88   12.70
  -5   6   1  242.08   13.50
   5  -6   1  209.18   12.70
   5  -6   1  255.27   17.10
  -5   5  -1  450.85   22.20
  -5   5  -1  502.45   22.30
  -5   5  -1  547.25   22.80
   5  -5  -1  541.65   26.00
  -5   5   1  578.54   23.70
  -5   5   1  542.85   22.70
  -5   5   1  506.65   23.10
   5  -5   1  526.25   26.10
  -5   4  -1   70.99    6.30
  -5   4  -1   76.89    7.60
   5  -4  -1   66.69    8.50
   5  -4   1   73.59    7.60
  -5   4   1   60.69    6.10
   5  -3  -1 8833.42  303.37
  -5   2  -1   54.39    6.10
   5  -2  -1   42.90    4.70
   5  -2  -1   38.80    5.00
   5  -2  -1   39.80    4.90
   5  -2  -1   40.10    4.10
  -5   2  -1   59.29    5.00
   5  -2   1   56.19    5.40
   5  -2   1   58.59    4.60
  -5   2   1   47.80    5.30
   5  -2   1   55.59    4.20
   5  -1  -1    0.30    1.90
   5  -1  -1    3.90    2.20
   5  -1  -1    6.60    2.20
   5  -1  -1    2.70    2.00
   5  -1   1    6.90    2.50
   5  -1   1    9.20    2.90
   5   0  -1    0.40    1.90
   5   0  -1   -1.10    1.90
   5   0  -1    0.70    1.90
  -5   0   1    1.00    2.00
   5   0   1   -0.10    2.00
  -5   0   1   -1.00    1.60
   5   1  -1    1.80    2.00
   5   1  -1    2.50    1.80
   5   1  -1    1.90    1.90
   5   1   1    5.70    2.30
   5   2  -1   46.20    4.30
   5   2  -1   46.50    4.40
   5   2   1   44.40    4.30
  -5  -3   1 9999.00  352.86
   5   4   1   81.09    6.10
   5   4   1   81.29    6.60
   5   4   1   67.59    5.40
  -5  -5   1  506.55   23.80
   5   5   1  523.35   22.10
   5   5   1  499.05   22.90
  -5  -5   1  537.55   24.10
   5   5   1  513.95   21.40
  -5  -6  -1  244.08   15.90
  -5  -6  -1  202.98   16.10
  -5  -6  -1  240.78   14.00
  -5  -6   1  219.88   13.60
  -5  -6   1  251.87   18.10
  -5  -6   1  257.77   20.00
  -5  -6   1  231.38   14.80
  -5  -6   1  228.58   16.40
   5   6   1  264.17   13.40
   5   6   1  228.78   12.20
  -5  -6   1  219.98   17.40
  -5  -6   1  256.07   15.00
  -5  -7  -1  105.39   10.10
  -5  -7  -1  110.49    8.50
  -5  -7  -1  111.79   16.20
  -5  -7  -1   96.89   14.30
   5   7   1   96.09    8.70
  -5  -7   1   92.79    9.70
  -5  -7   1   97.59   15.60
   5   7   1   96.09    7.80
  -5  -7   1   98.09   10.20
  -5  -7   1  113.89   16.90
  -5  -7   1   92.79   14.50
   5   7   1   90.19    8.70
  -5  -7   1  107.29   10.30
  -5  -7   1  101.09   12.60
  -5  -7   1  101.69   12.30
  -5  -7   1  101.99    9.00
  -5  -8  -1   70.19   11.40
  -5  -8  -1  121.99   12.50
  -5  -8  -1  131.99   15.50
  -5  -8  -1  114.39   18.30
  -5  -8  -1  132.59   17.60
   5   8   1  110.59    8.60
  -5  -8   1   94.89   14.80
  -5  -8   1   95.89   15.80
  -5  -8   1   80.19   11.50
  -5  -8   1  101.49   10.40
  -5  -8   1   79.89   11.30
  -5  -8   1  106.59   16.80
   5   8   1   96.99    9.50
  -5  -9  -1   42.60   13.40
  -5  -9  -1   37.70    9.40
  -5  -9   1   40.10   11.20
  -5  -9   1   37.20    9.40
  -5  -9   1   26.70    7.70
   5   9   1   30.00    5.90
   5   9   1   38.90    7.30
  -5  -9   1   36.00   11.10
  -5 -10  -1   24.60    9.30
  -5 -10  -1   23.20   10.00
  -5 -10   1   22.70    8.90
  -5 -10   1   25.90    9.30
   5  10   1   20.30    6.50
  -5 -10   1   29.10    6.80
  -5 -10   1   22.00    7.10
   5  10   1   12.80    4.60
  -5 -11  -1   35.00   10.00
  -5 -11  -1   41.10   10.30
   5  11   1   32.50    5.60
  -5 -11   1   23.80    8.20
  -5 -11   1   20.80    7.80
   5  11   1   31.40    6.80
  -5 -12  -1    7.00    4.50
  -5 -12  -1    3.60    5.30
  -5 -12   1   13.20    4.20
   5  12   1   17.90    4.50
  -5 -12   1   13.70    6.70
  -5  12  -2    9.10    3.90
  -5  12   2    3.00    3.20
   5 -12   2    3.20    3.80
   5 -11  -2  625.84   36.40
  -5  11  -2  702.23   28.30
   5 -11  -2  680.73   31.90
  -5  11  -2  661.03   30.60
  -5  11   2  640.04   28.40
  -5  11   2  689.33   32.60
   5 -11   2  663.23   38.60
  -5  11   2  708.53   31.20
   5 -11   2  664.03   32.00
   5 -10  -2  163.58   14.50
   5 -10  -2  152.78   14.20
  -5  10  -2  174.68   11.70
  -5  10  -2  140.29   15.10
  -5  10   2  178.48   13.70
   5 -10   2  177.28   15.40
  -5  10   2  191.18   12.40
  -5  10   2  161.28   13.90
   5 -10   2  182.68   13.90
   5  -9  -2   83.19   12.50
  -5   9  -2  102.39    9.00
   5  -9  -2   78.29    9.70
   5  -9   2   91.09   12.30
  -5   9   2   78.89   10.70
  -5   9   2   89.69   11.80
   5  -9   2   75.89   14.60
   5  -9   2   71.59   12.00
  -5   9   2   94.29   12.50
  -5   8  -2   47.10    7.30
   5  -8  -2   52.89    9.80
  -5   8  -2   38.30    7.10
   5  -8  -2   62.49    9.60
  -5   8   2   40.10    7.90
   5  -8   2   43.00   11.20
  -5   8   2   48.10    9.00
   5  -8   2   49.60   11.40
  -5   8   2   30.60   10.60
   5  -8   2   37.40    8.50
  -5   8   2   68.09    9.00
   5  -8   2   40.10    8.30
   5  -7  -2 1008.10   44.30
  -5   7  -2  986.60   41.60
   5  -7  -2 1046.50   45.40
   5  -7   2  975.80   44.10
   5  -7   2 1068.19   49.10
  -5   7   2 1111.59   44.60
  -5   7   2 1047.50   43.70
  -5   7   2 1049.09   44.80
   5  -7   2 1053.09   46.60
   5  -7   2 1078.59   45.60
  -5   7   2 1030.50   41.50
  -5   6  -2  166.08   11.00
   5  -6  -2  175.68   12.90
   5  -6  -2  160.18   14.70
  -5   6  -2  173.38   10.90
  -5   6   2  161.08   11.50
   5  -6   2  187.38   14.90
  -5   6   2  168.98   12.00
   5  -6   2  190.38   13.50
   5  -5  -2 1942.81   75.69
  -5   5  -2 1937.61   71.59
  -5   5  -2 2050.09   71.49
  -5   5   2 1935.11   72.19
  -5   5   2 1824.92   70.69
  -5   5   2 1944.41   72.59
   5  -5   2 2021.90   75.79
  -5   4  -2  292.27   14.00
  -5   4  -2  266.77   14.10
   5  -4  -2  305.97   14.20
   5  -4  -2  293.67   14.80
   5  -4  -2  286.17   16.30
   5  -4  -2  289.57   13.40
  -5   4   2  298.67   14.60
   5  -4   2  281.57   16.30
   5  -3  -2  346.97   16.90
   5  -3  -2  343.77   15.70
   5  -3  -2  354.06   16.70
   5  -3  -2  350.16   16.10
  -5   3   2  384.16   16.50
   5  -2  -2    5.20    2.50
  -5   2  -2    9.90    3.40
   5  -2  -2    9.00    2.90
   5  -2  -2    6.90    2.70
  -5   2  -2   15.10    4.50
   5  -2  -2    5.90    2.80
  -5   2   2    8.20    2.80
  -5   2   2    8.80    3.10
   5  -2   2    5.40    3.00
   5  -1  -2   84.49    6.30
   5  -1  -2   79.99    6.00
   5  -1  -2   87.59    5.90
   5  -1   2   91.99    7.00
  -5   1   2   89.99    6.00
   5   0  -2  295.27   13.40
   5   0  -2  315.87   13.60
   5   0  -2  317.07   13.90
   5   0   2  299.37   14.80
  -5   0   2  297.17   13.20
   5   1  -2   96.59    5.60
   5   1  -2   96.89    6.00
   5   1  -2   92.29    6.00
   5   2  -2    7.70    2.40
   5   2  -2    8.60    2.30
  -5  -2   2    8.30    3.10
   5   3   2  371.46   15.80
   5   3   2  338.17   16.60
   5   4   2  300.87   16.00
  -5  -4   2  333.37   16.50
   5   5   2 1993.20   74.69
  -5  -5   2 2049.40   75.09
   5   5   2 2040.20   72.49
  -5  -5   2 1919.11   74.49
  -5  -6  -2  186.38   12.40
  -5  -6   2  185.38   15.40
  -5  -6   2  169.28   15.60
  -5  -6   2  178.28   11.70
  -5  -6   2  183.68   12.40
  -5  -6   2  152.78   11.90
   5   6   2  197.38   11.60
  -5  -6   2  194.18   17.40
   5   6   2  180.28   12.40
  -5  -6   2  169.58   16.70
   5   6   2  161.78   10.30
  -5  -6   2  187.58   13.50
  -5  -6   2  186.88   17.80
  -5  -7  -2 1045.10   47.20
  -5  -7  -2 1046.60   46.30
  -5  -7  -2 1020.70   42.70
  -5  -7  -2 1022.70   46.20
  -5  -7   2 1084.39   51.89
  -5  -7   2 1020.20   43.70
   5   7   2  994.90   43.60
  -5  -7   2  980.70   53.69
  -5  -7   2 1129.99   50.59
  -5  -7   2  982.60   44.40
  -5  -7   2 1030.40   50.49
  -5  -7   2 1004.50   41.80
   5   7   2 1009.40   40.70
  -5  -7   2 1034.90   48.30
   5   7   2 1081.09   44.00
  -5  -7   2 1061.79   45.00
  -5  -7   2 1073.59   44.30
  -5  -7   2 1074.19   46.10
  -5  -7   2 1000.10   43.60
   5   7   2  901.91   44.10
  -5  -8  -2   41.30   11.60
  -5  -8  -2   43.40    9.30
  -5  -8  -2   29.80    8.80
  -5  -8  -2   38.30    6.50
  -5  -8  -2   35.20    8.90
  -5  -8   2   44.60   10.20
  -5  -8   2   41.70   11.20
   5   8   2   44.00    6.70
   5   8   2   50.19    9.60
  -5  -8   2   65.79   13.70
   5   8   2   34.60    7.30
  -5  -8   2   36.10   11.60
  -5  -8   2   23.10    6.50
  -5  -8   2   27.10    6.60
  -5  -8   2   45.40   10.30
  -5  -8   2   27.80    7.10
   5   8   2   35.30    7.40
  -5  -9  -2  119.59   14.10
  -5  -9  -2   67.99   11.30
  -5  -9  -2   95.49   17.30
  -5  -9  -2  109.69   16.50
  -5  -9   2   82.49   11.90
   5   9   2   98.09   10.00
  -5  -9   2   83.79   15.30
   5   9   2   74.99   11.10
  -5  -9   2   83.19   11.70
  -5  -9   2   95.49   16.00
   5   9   2   71.29    9.40
  -5  -9   2   78.59   13.10
  -5 -10  -2  148.39   20.70
  -5 -10  -2  186.28   17.80
   5  10   2  163.88   12.90
  -5 -10   2  154.98   20.00
  -5 -10   2  168.68   17.40
  -5 -10   2  176.58   15.70
   5  10   2  156.28   11.90
   5  10   2  168.08   11.60
  -5 -11  -2  639.24   34.80
  -5 -11  -2  718.93   35.50
  -5 -11   2  630.64   33.30
   5  11   2  630.24   29.50
  -5 -11   2  645.74   34.30
   5  11   2  604.04   28.60
   5  11   2  681.03   28.00
  -5 -12  -2    0.30    4.80
  -5 -12  -2    5.20    4.10
   5  12   2    8.10    2.80
  -5 -12   2    9.00    5.30
   5  12   2    4.70    3.00
   5 -12  -3    4.70    3.30
   5 -12   3    4.70    4.10
  -5  12   3    3.50    4.00
  -5  12   3    8.40    4.10
   5 -11  -3    6.10    4.40
  -5  11   3    8.50    5.60
   5 -11   3    3.30    4.10
  -5  11   3    5.80    4.50
  -5  11   3   10.10    3.90
  -5  11   3   10.60    4.00
   5 -10  -3   14.10    6.80
   5 -10  -3    8.90    3.80
   5 -10  -3    9.80    5.50
   5 -10   3    7.60    5.20
  -5  10   3   13.70    7.00
   5 -10   3    6.90    5.70
  -5  10   3   10.60    4.20
  -5  10   3   10.70    4.40
   5  -9  -3 1294.67   54.29
   5  -9  -3 1313.47   53.09
  -5   9   3 1291.87   53.89
   5  -9   3 1245.28   53.49
   5  -9   3 1205.18   69.59
  -5   9   3 1156.38   54.59
  -5   9   3 1308.17   50.69
   5  -9   3 1254.57   54.49
  -5   9   3 1339.97   54.59
   5  -8  -3  195.88   15.50
  -5   8  -3  219.58   13.30
   5  -8  -3  196.88   15.30
   5  -8   3  184.28   15.10
  -5   8   3  163.48   12.10
   5  -8   3  172.98   15.30
  -5   8   3  207.48   14.90
   5  -8   3  177.78   15.40
  -5   8   3  208.88   15.50
   5  -8   3  206.38   18.70
  -5   8   3  203.08   14.70
  -5   7  -3  210.48   12.70
   5  -7  -3  183.28   14.60
   5  -7  -3  201.68   15.20
   5  -7   3  173.18   14.80
  -5   7   3  197.08   12.70
   5  -7   3  200.18   15.10
  -5   7   3  178.88   14.00
   5  -7   3  175.18   16.50
  -5   7   3  174.58   13.00
  -5   7   3  221.68   14.90
   5  -7   3  183.08   14.20
  -5   6  -3  146.79   12.60
   5  -6  -3  191.68   13.90
   5  -6  -3  160.08   11.50
  -5   6  -3  167.88   10.90
  -5   6   3  153.68   11.50
   5  -6   3  181.78   13.20
   5  -6   3  141.29   12.70
  -5   6   3  166.58    9.90
   5  -6   3  178.38   13.60
  -5   6   3  179.98   16.20
   5  -6   3  151.68   13.90
  -5   6   3  150.78   11.80
  -5   5  -3 1480.55   54.29
   5  -5  -3 1385.46   55.69
   5  -5   3 1479.45   60.09
  -5   5   3 1485.65   56.79
  -5   5   3 1412.86   54.29
  -5   5   3 1465.15   55.99
   5  -4  -3  578.24   25.40
   5  -4  -3  584.54   24.90
   5  -4  -3  539.65   23.30
  -5   4   3  542.05   23.40
  -5   4   3  556.84   24.50
  -5   4   3  574.74   27.50
   5  -4   3  590.34   27.00
  -5   4   3  539.85   25.00
   5  -3  -3 1231.48   47.30
   5  -3  -3 1248.28   49.50
   5  -3  -3 1352.56   49.30
  -5   3   3 1260.87   47.50
  -5   3   3 1354.06   49.40
   5  -2  -3    6.50    3.00
  -5   2  -3    8.10    3.20
   5  -2  -3   11.20    3.20
  -5   2  -3    8.40    3.90
   5  -2  -3    7.60    3.00
  -5   2   3    8.90    3.10
   5  -2   3    8.10    3.60
  -5   2   3    5.80    3.90
  -5   2   3    7.10    2.80
   5  -1  -3   35.70    4.90
   5  -1  -3   28.50    4.60
   5  -1  -3   45.10    5.60
   5  -1  -3   40.80    4.90
  -5   1   3   39.20    4.90
  -5   1   3   29.60    9.60
  -5   1   3   42.30    4.50
   5   0  -3    2.50    2.20
   5   0  -3    0.30    2.10
   5   0  -3    0.70    2.00
   5   0   3    2.40    2.60
   5   1  -3   34.20    4.00
   5   2  -3    8.10    2.50
  -5  -2   3   14.80    4.00
  -5  -3   3 1359.56   51.49
  -5  -4   3  605.94   26.30
  -5  -4   3  595.54   26.40
  -5  -5   3 1514.15   57.99
  -5  -5   3 1491.45   57.69
  -5  -6  -3  157.48   12.70
  -5  -6   3  159.88   13.80
  -5  -6   3  187.28   12.70
  -5  -6   3  179.68   13.30
  -5  -6   3  207.58   23.10
  -5  -6   3  160.78   16.00
  -5  -6   3  190.68   17.60
  -5  -6   3  192.28   12.70
  -5  -6   3  191.18   13.90
  -5  -6   3  208.78   14.80
   5   6   3  164.38   13.30
  -5  -6   3  186.38   17.00
  -5  -6   3  178.08   11.70
  -5  -7  -3  186.48   15.60
  -5  -7  -3  230.88   17.00
  -5  -7  -3  198.68   14.00
  -5  -7   3  196.18   14.60
  -5  -7   3  182.88   13.30
   5   7   3  185.38   13.70
  -5  -7   3  190.98   13.60
  -5  -7   3  211.48   19.30
  -5  -7   3  188.68   13.50
  -5  -7   3  186.18   14.60
  -5  -7   3  205.08   15.50
  -5  -7   3  204.28   14.80
  -5  -7   3  172.58   14.30
   5   7   3  163.38   13.50
  -5  -7   3  200.48   18.50
  -5  -7   3  196.98   18.80
  -5  -7   3  205.08   14.00
  -5  -7   3  188.48   16.20
  -5  -8  -3  177.98   16.20
  -5  -8  -3  193.58   17.20
  -5  -8  -3  191.68   14.00
  -5  -8   3  158.58   21.10
  -5  -8   3  202.98   19.00
  -5  -8   3  185.58   14.80
  -5  -8   3  222.08   15.00
  -5  -8   3  191.18   14.30
   5   8   3  194.68   14.90
  -5  -8   3  213.28   19.90
  -5  -8   3  203.88   15.20
  -5  -8   3  179.68   16.50
   5   8   3  210.28   14.50
  -5  -8   3  189.28   14.30
  -5  -8   3  196.48   14.70
   5   8   3  198.68   12.90
  -5  -9  -3 1199.28   59.39
  -5  -9  -3 1270.77   59.49
  -5  -9  -3 1246.28   57.49
  -5  -9  -3 1256.47   49.10
  -5  -9   3 1285.97   59.49
   5   9   3 1243.68   53.39
   5   9   3 1221.38   51.79
   5   9   3 1275.47   48.40
  -5  -9   3 1213.48   52.19
  -5  -9   3 1293.87   60.09
  -5  -9   3 1268.67   60.09
   5   9   3 1319.37   50.49
  -5 -10  -3   19.70    9.40
  -5 -10  -3   11.70    6.50
   5  10   3   11.40    5.30
  -5 -10   3   -0.80    5.80
   5  10   3   13.70    4.40
  -5 -10   3    5.40    5.30
   5  10   3    8.50    4.20
  -5 -10   3   11.10    4.80
  -5 -11  -3    3.20    5.10
   5  11   3    5.60    4.40
   5  11   3    9.40    4.00
  -5 -11   3    5.80    4.40
   5  11   3    4.60    2.90
  -5 -11   3    9.20    7.20
  -5 -12  -3    7.60    5.00
  -5 -12  -3    0.90    4.50
  -5 -12   3    2.80    3.60
   5  12   3    3.80    2.20
   5 -11  -4  302.67   18.20
   5 -11   4  298.77   17.70
   5 -11   4  300.47   16.80
  -5  11   4  282.47   15.70
  -5  11   4  298.37   16.50
  -5  11   4  306.77   17.20
   5 -10  -4   12.80    5.40
   5 -10  -4   11.80    4.40
  -5  10   4   10.60    4.20
   5 -10   4   12.60    6.60
   5 -10   4   13.30    5.80
  -5  10   4   18.00    5.40
   5  -9  -4   23.80    6.80
   5  -9  -4   18.60    6.00
   5  -9   4   24.90    7.60
  -5   9   4   25.00    6.40
   5  -9   4   30.30    7.70
  -5   9   4   31.80    6.70
   5  -9   4   28.30    9.40
  -5   9   4   23.00    6.50
   5  -9   4   32.10    8.30
   5  -8  -4   11.70    5.30
   5  -8  -4    7.10    4.50
  -5   8   4    5.00    4.10
   5  -8   4   12.80    7.30
  -5   8   4    6.00    4.20
   5  -8   4    7.80    5.20
   5  -8   4   16.60    6.30
   5  -8   4    6.10    5.10
  -5   8   4   12.50    4.90
  -5   8   4    8.60    4.40
   5  -7  -4   13.00    4.80
  -5   7  -4   13.50    4.60
   5  -7  -4    9.50    4.70
  -5   7   4    8.60    4.30
  -5   7   4    1.60    3.00
  -5   7   4    8.50    4.00
   5  -7   4   10.00    8.60
   5  -7   4    8.20    4.40
   5  -7   4   11.10    5.10
  -5   7   4    3.30    3.90
   5  -7   4   -0.80    4.00
   5  -6  -4   12.80    5.60
   5  -6  -4   17.00    5.10
   5  -6  -4   28.40    7.00
  -5   6  -4   17.80    4.60
   5  -6   4   21.30    6.20
   5  -6   4   19.90    7.30
  -5   6   4   11.00    4.80
  -5   6   4   19.60    5.10
   5  -6   4   30.70    6.90
  -5   6   4   14.10    5.00
  -5   6   4   41.40    8.60
  -5   6   4   20.90    6.40
   5  -6   4   36.60    7.90
  -5   6   4   14.90    4.90
   5  -6   4   23.50    6.30
  -5   5  -4 1577.14   57.89
   5  -5  -4 1495.95   63.19
   5  -5  -4 1550.34   60.59
   5  -5  -4 1546.95   57.89
  -5   5   4 1621.64   61.59
  -5   5   4 1584.64   61.59
   5  -5   4 1535.85   59.79
   5  -5   4 1575.14   63.69
   5  -5   4 1522.45   61.69
  -5   5   4 1600.04   82.39
   5  -5   4 1510.85   61.29
  -5   5   4 1527.05   59.69
  -5   5   4 1543.75   57.99
  -5   4  -4   77.39    7.70
   5  -4  -4   74.39    8.00
  -5   4  -4   64.29    6.40
   5  -4  -4   76.99    7.50
  -5   4  -4   67.49    6.40
   5  -4  -4   76.89    7.00
   5  -4  -4   72.59    8.80
  -5   4   4   63.69    6.20
   5  -4   4   66.89   10.20
   5  -3  -4 3754.82  133.89
   5  -3  -4 3714.23  131.09
   5  -3  -4 3663.53  131.59
   5  -3  -4 3889.91  133.59
  -5   3   4 3639.84  130.49
  -5   3   4 3818.92  131.99
  -5   3   4 3687.23  133.29
   5  -2  -4   62.19    7.20
  -5   2  -4   81.19    8.30
   5  -2  -4   61.79    5.80
  -5   2  -4   83.09    6.40
   5  -2  -4   59.29    7.50
   5  -2  -4   74.19    7.00
  -5   2   4   60.29    5.70
  -5   2   4   60.49    6.20
   5  -1  -4 1486.45   53.29
   5  -1  -4 1374.06   51.09
  -5   1   4 1439.06   51.09
  -5   1   4 1282.07   51.89
   5   0  -4   64.29    6.00
   5   0  -4   59.99    7.40
   5   0  -4   65.79    5.90
   5   0  -4   68.59    5.50
   5   1  -4 1494.15   54.19
   5   1  -4 1474.75   55.59
   5   1  -4 1423.66   52.49
   5   1  -4 1444.66   53.49
  -5  -1   4 1470.35   55.19
   5   2  -4   72.59    5.80
  -5  -3   4 3958.10  143.69
  -5  -3   4 4144.59  143.69
  -5  -4   4   89.69    8.10
  -5  -5   4 1666.23   65.49
  -5  -5   4 1648.83   72.09
  -5  -5   4 1837.92   76.09
  -5  -5   4 1675.23   65.49
  -5  -5   4 1800.92   68.39
  -5  -5   4 1658.23   73.39
  -5  -5   4 1788.62   70.29
  -5  -6   4   16.40    6.90
  -5  -6   4   33.10    7.10
  -5  -6   4   21.50    5.00
   5   6   4   15.00    4.80
  -5  -6   4   17.90    5.50
  -5  -6   4   19.90    5.00
  -5  -6   4   19.00    5.70
  -5  -6   4   26.90    6.20
  -5  -6   4   26.50    5.90
  -5  -6   4   11.30    6.40
  -5  -6   4   22.80    6.20
  -5  -6   4   24.20    7.60
  -5  -7  -4    7.50    4.90
  -5  -7   4    7.20    3.60
  -5  -7   4   10.60    6.30
  -5  -7   4   12.40    5.90
  -5  -7   4    2.50    3.00
  -5  -7   4    5.90    6.00
  -5  -7   4    6.20    4.30
  -5  -7   4    5.30    3.80
  -5  -7   4   10.00    5.50
  -5  -7   4    7.20    4.10
  -5  -7   4    8.90    4.20
  -5  -7   4    4.60    5.20
  -5  -7   4   -1.10    3.30
  -5  -8  -4   10.10    4.70
  -5  -8  -4    0.70    4.50
  -5  -8   4   11.90    4.90
  -5  -8   4    5.40    6.20
  -5  -8   4   -0.20    2.50
  -5  -8   4    7.00    6.70
   5   8   4    5.70    3.80
  -5  -8   4   10.50    4.40
  -5  -8   4    5.80    4.60
  -5  -8   4    8.60    5.30
  -5  -8   4   10.70    4.90
  -5  -8   4    4.30    4.50
  -5  -8   4    8.80    4.50
   5   8   4   10.90    4.30
  -5  -8   4    6.90    5.10
  -5  -8   4   13.90    6.10
   5   8   4   10.80    4.40
  -5  -8   4    7.30    4.80
  -5  -9  -4   21.60    9.30
  -5  -9  -4   37.90    9.60
  -5  -9  -4   32.00    9.60
  -5  -9  -4   29.30    6.20
   5   9   4   32.00    6.60
  -5  -9   4   35.60    9.90
  -5  -9   4   19.80    5.70
   5   9   4   23.20    5.40
  -5  -9   4   36.70    9.40
   5   9   4   22.70    6.40
  -5  -9   4   25.00   10.20
   5   9   4   42.10    9.10
  -5  -9   4   22.20    6.20
   5   9   4   24.90    6.30
  -5 -10  -4   15.50    8.20
  -5 -10  -4    2.40    4.90
   5  10   4   16.10    4.90
  -5 -10   4   19.80    7.60
  -5 -10   4   11.00    5.80
  -5 -10   4   14.50    6.90
   5  10   4   10.00    5.90
   5  10   4   11.90    4.20
  -5 -11  -4  291.77   19.40
  -5 -11  -4  289.57   20.00
   5  11   4  280.17   14.60
   5  11   4  274.97   15.20
   5  11   4  280.87   16.20
  -5 -11   4  242.58   18.80
  -5 -11   4  292.07   19.00
   5 -11  -5   26.00    6.30
   5 -11   5   36.80    6.90
  -5  11   5   37.20    6.70
  -5  11   5   38.00    6.10
   5 -11   5   46.70    7.30
   5 -10  -5   -0.50    3.20
  -5  10   5    0.30    2.90
   5 -10   5    3.20    4.90
   5 -10   5    0.00    4.10
  -5  10   5    5.00    3.30
   5  -9  -5  709.13   35.00
  -5   9   5  734.73   31.80
  -5   9   5  730.83   34.30
  -5   9   5  734.13   34.40
   5  -9   5  770.82   35.40
   5  -9   5  712.23   36.00
   5  -9   5  720.93   34.90
   5  -8  -5   47.80    9.30
   5  -8   5   48.70    9.80
   5  -8   5   45.40    9.80
  -5   8   5   62.29   10.10
  -5   8   5   59.79    9.60
   5  -8   5   66.79   11.40
  -5   8   5   66.29    8.70
   5  -8   5   43.00   10.50
  -5   8   5   53.99   10.30
   5  -7  -5   68.89   12.60
   5  -7  -5   83.89   12.70
   5  -7   5   60.89   11.00
  -5   7   5   82.59   10.00
   5  -7   5   67.59   12.00
   5  -7   5   68.99   11.60
  -5   7   5   77.39   12.60
   5  -7   5   65.89   12.80
   5  -7   5   70.89   10.80
  -5   7   5   81.49    9.20
  -5   7   5  104.79   12.50
  -5   7   5   90.89   12.50
  -5   7   5   80.19   11.20
  -5   6  -5   41.20    6.80
   5  -6  -5   69.29   10.80
   5  -6  -5   58.09   10.40
   5  -6   5   35.50    7.70
  -5   6   5   57.49    8.10
   5  -6   5   39.70    7.90
  -5   6   5   60.19    9.60
   5  -6   5   33.10    8.00
  -5   6   5   52.49    9.40
  -5   6   5   47.00   10.50
   5  -6   5   42.60    8.40
   5  -6   5   39.10    9.10
   5  -6   5   38.10    8.50
  -5   6   5   49.10    8.50
   5  -5  -5  886.71   36.40
   5  -5  -5  858.01   41.50
  -5   5  -5  884.11   36.00
   5  -5  -5  921.81   39.40
   5  -5  -5  834.02   36.90
   5  -5   5  893.41   39.20
  -5   5   5  842.62   42.30
   5  -5   5  896.51   39.80
   5  -5   5  875.41   39.60
  -5   5   5  856.01   35.40
  -5   5   5  903.51   39.00
  -5   5   5  891.11   39.70
   5  -5   5  896.71   37.80
   5  -5   5  979.20   42.20
   5  -5   5  847.62   47.20
   5  -5   5  904.71   40.70
  -5   4  -5  519.75   24.60
   5  -4  -5  448.96   23.00
   5  -4  -5  487.65   24.20
   5  -4  -5  554.94   24.60
   5  -4  -5  495.45   25.00
   5  -4  -5  472.15   22.80
  -5   4  -5  500.35   22.20
   5  -4  -5  538.35   26.90
   5  -4   5  501.35   25.30
  -5   4   5  499.65   24.90
   5  -4   5  506.05   26.30
   5  -4   5  491.35   23.60
  -5   4   5  476.35   21.70
  -5   4   5  480.95   24.00
  -5   4   5  534.75   24.80
   5  -3  -5 1269.27   50.59
   5  -3  -5 1254.47   51.19
   5  -3  -5 1273.07   48.80
   5  -3  -5 1283.87   48.00
  -5   3   5 1207.38   46.90
  -5   3   5 1269.87   48.60
   5  -2  -5   38.40    6.80
  -5   2   5   22.50    4.60
  -5   2   5   34.00    5.50
   5  -1  -5  258.07   14.60
   5  -1  -5  256.17   13.80
   5  -1  -5  261.57   13.00
   5  -1  -5  253.77   15.00
  -5   1   5  258.97   15.70
   5   0  -5    2.40    2.40
   5   0  -5    2.50    2.60
   5   0  -5    0.00    2.60
   5   1  -5  260.67   12.50
   5   1  -5  236.98   14.70
   5   1  -5  268.17   14.10
  -5  -1   5  280.77   14.90
  -5  -1   5  248.78   15.60
   5   2  -5   29.50    4.90
   5   2  -5   27.40    5.50
  -5  -2   5   33.20    5.80
   5   3  -5 1416.86   55.49
  -5  -3   5 1390.26   54.29
  -5  -4   5  598.14   26.60
  -5  -4   5  551.84   27.00
  -5  -4   5  632.64   34.80
  -5  -4   5  577.84   29.90
  -5  -4   5  541.55   32.00
  -5  -4   5  539.55   33.50
  -5  -4   5  579.24   29.60
  -5  -4   5  593.74   29.10
  -5  -4   5  573.24   26.20
  -5  -5   5  949.90   40.50
  -5  -5   5  910.21   47.30
  -5  -5   5  955.70   47.30
  -5  -5   5  962.60   40.90
  -5  -5   5 1009.70   42.20
  -5  -5   5  998.40   50.19
  -5  -5   5  937.61   40.20
  -5  -5   5  954.50   45.80
  -5  -5   5 1077.29   44.40
  -5  -5   5 1033.90   45.40
  -5  -5   5 1100.09   54.99
  -5  -5   5 1006.10   43.60
  -5  -6   5   54.79   11.70
  -5  -6   5   53.39    9.00
  -5  -6   5   55.79    9.20
  -5  -6   5   48.20   11.70
  -5  -6   5   49.90    8.00
  -5  -6   5   60.19   12.60
  -5  -6   5   34.90    7.80
  -5  -6   5   42.10    7.90
  -5  -6   5   43.10    8.60
  -5  -6   5   54.49    8.20
  -5  -6   5   58.69    9.90
  -5  -6   5   45.20    7.70
   5   7  -5   69.69   11.00
  -5  -7   5   81.09   14.60
  -5  -7   5   91.39   11.50
  -5  -7   5   90.99   11.20
  -5  -7   5   88.39    8.50
  -5  -7   5   97.69    9.30
  -5  -7   5   87.99   15.60
  -5  -7   5   96.89   13.10
  -5  -7   5   59.09   12.60
  -5  -7   5   72.69   11.30
  -5  -7   5   71.79   10.60
  -5  -7   5   71.39   11.10
  -5  -7   5   87.29    8.80
  -5  -7   5   75.09   11.20
   5   7   5   65.89    9.90
  -5  -8  -5   44.30    8.80
  -5  -8   5   56.99   10.30
  -5  -8   5   74.59   14.10
  -5  -8   5   53.49   12.00
  -5  -8   5   59.39    9.70
  -5  -8   5   52.79    8.80
  -5  -8   5   55.79    9.90
  -5  -8   5   56.59    8.30
   5   8   5   41.50    8.00
   5   8   5   50.19    9.10
  -5  -8   5   64.49   12.50
  -5  -8   5   48.50    9.10
   5   8   5   57.59    9.50
  -5  -9  -5  768.02   34.10
  -5  -9  -5  776.52   41.60
  -5  -9  -5  678.43   37.10
  -5  -9   5  755.32   39.30
  -5  -9   5  732.73   33.60
   5   9   5  765.12   34.30
  -5  -9   5  736.33   39.70
  -5  -9   5  765.72   39.60
  -5  -9   5  722.83   35.40
  -5  -9   5  740.43   34.90
  -5 -10  -5   -6.80    5.70
   5  10   5    2.40    3.00
  -5 -10   5   -0.80    4.20
  -5 -10   5    1.20    2.80
   5  10   5    1.80    3.50
  -5 -11  -5   38.40    9.20
  -5 -11  -5   27.40    6.80
   5  11   5   29.10    5.10
   5  11   5   32.40    6.00
   5 -11  -6   21.20    5.60
  -5  11   6   21.70    4.10
   5 -11   6   16.50    4.60
   5 -11   6   23.70    8.30
  -5  11   6   22.90    4.30
   5 -11   6   20.50    7.50
   5 -10  -6   11.70    5.50
   5 -10   6   13.30    5.90
  -5  10   6   10.40    4.70
   5 -10   6   27.10    6.90
   5  -9  -6   45.30    8.10
   5  -9   6   40.60    8.70
   5  -9   6   42.20    8.80
  -5   9   6   34.20    7.00
   5  -9   6   43.90    9.00
  -5   9   6   67.39    8.90
  -5   9   6   52.19   10.10
   5  -8  -6   26.40    6.90
   5  -8   6    8.10    4.90
  -5   8   6   26.30    8.90
   5  -8   6   37.30    8.90
   5  -8   6   30.90    8.80
  -5   8   6   24.80    5.90
  -5   8   6   16.70    5.40
   5  -8   6   17.10    9.00
   5  -8   6   20.60    6.70
   5  -7  -6   56.69   10.70
   5  -7  -6   70.79   11.60
   5  -7   6   63.19   11.70
   5  -7   6   67.19   10.90
   5  -7   6   55.49    9.60
   5  -7   6   60.79   11.90
  -5   7   6   62.19    9.60
  -5   7   6   55.69    8.90
  -5   7   6   60.59   11.90
  -5   7   6   59.69    8.00
   5  -7   6   49.90    9.70
  -5   7   6   58.39   10.30
  -5   7   6   46.00   10.00
   5  -6  -6   21.40    7.40
   5  -6  -6   13.20    4.50
   5  -6  -6    4.20    4.70
  -5   6  -6    3.20    5.00
   5  -6   6    1.00    4.30
  -5   6   6   12.30    5.70
   5  -6   6    6.60    4.70
  -5   6   6    1.50    3.50
   5  -6   6   13.70    5.90
   5  -6   6    7.00    5.50
   5  -6   6    6.30    5.00
  -5   6   6   14.60    6.00
   5  -6   6   15.40    6.30
   5  -5  -6 2003.10   80.39
   5  -5  -6 1931.11   77.19
  -5   5  -6 2117.39   75.59
   5  -5  -6 1956.00   82.89
  -5   5  -6 2076.39   76.19
  -5   5   6 2052.69   77.99
   5  -5   6 2170.48   80.89
   5  -5   6 1931.11   79.39
  -5   5   6 1917.71   79.99
   5  -5   6 2021.50   79.89
   5  -5   6 2016.50   79.19
  -5   5   6 2064.19   78.89
   5  -5   6 2093.69   82.69
   5  -5   6 2103.89   77.99
   5  -5   6 2172.38   81.79
   5  -4  -6   30.90    7.30
   5  -4  -6   27.60    6.00
   5  -4  -6   34.50    6.20
   5  -4  -6   26.50    7.80
   5  -4  -6   35.60    6.60
   5  -4  -6   43.70    8.00
   5  -4  -6   36.30    7.50
  -5   4  -6   41.00    6.60
  -5   4  -6   40.60    6.30
   5  -4  -6   25.60    6.30
  -5   4   6   33.40    6.80
   5  -4   6   35.30    7.00
  -5   4   6   39.30    7.20
   5  -4   6   50.59    8.60
   5  -4   6   52.59    9.50
   5  -4   6   47.70    8.30
  -5   4   6   30.00    5.90
   5  -4   6   45.90    9.00
  -5   4   6   34.20    9.90
   5  -3  -6  245.18   13.90
   5  -3  -6  251.77   14.80
   5  -3  -6  268.17   17.50
   5  -3  -6  237.98   16.20
   5  -3  -6  260.47   21.70
   5  -3  -6  250.87   16.70
  -5   3   6  258.27   14.80
   5  -2  -6    8.10    4.50
   5  -2  -6   14.50    5.60
   5  -2  -6    9.50    4.10
   5  -2  -6    5.60    3.40
   5  -2  -6   10.10    3.70
   5  -2  -6   12.30    5.20
   5  -1  -6  872.71   35.90
   5  -1  -6  898.51   38.70
   5  -1  -6  848.02   37.40
   5   0  -6  498.55   20.80
   5   0  -6  474.65   22.50
   5   0  -6  482.85   21.30
   5   0  -6  470.95   23.30
   5   0  -6  506.15   24.70
   5   1  -6  908.91   38.00
   5   1  -6  920.71   39.70
   5   1  -6  932.81   36.00
   5   1  -6  904.11   37.10
  -5  -1   6  892.31   38.10
  -5  -1   6  930.01   40.30
   5   2  -6   15.40    3.90
   5   2  -6    9.00    4.70
  -5  -2   6   12.50    4.00
  -5  -2   6   13.20    5.30
  -5  -2   6   10.00    4.20
  -5  -2   6   14.10    4.70
  -5  -2   6   11.40    6.30
  -5  -2   6   18.20    6.50
   5   3  -6  299.87   17.50
   5   3  -6  268.07   14.70
  -5  -3   6  295.07   18.50
  -5  -3   6  272.77   15.90
  -5  -3   6  273.37   16.00
  -5  -3   6  260.57   20.50
  -5  -3   6  301.27   24.60
  -5  -3   6  281.77   21.20
   5   4  -6   32.50    7.10
  -5  -4   6   46.90   10.10
  -5  -4   6   33.90    7.20
  -5  -4   6   43.10   10.60
  -5  -4   6   41.50   10.80
  -5  -4   6   40.90    7.60
  -5  -4   6   35.60    9.50
  -5  -4   6   52.49   10.20
  -5  -4   6   35.00    7.90
  -5  -4   6   28.90    6.70
  -5  -4   6   35.10    6.80
  -5  -4   6   30.10    6.10
   5   5  -6 2271.57   86.29
  -5  -5   6 2230.88   85.89
  -5  -5   6 2194.88   84.09
  -5  -5   6 2129.39   91.99
  -5  -5   6 2266.47   89.09
  -5  -5   6 2174.68   83.79
  -5  -5   6 2158.38   93.29
  -5  -5   6 2455.95   96.89
  -5  -5   6 2303.27   87.19
  -5  -5   6 2196.28   83.99
  -5  -5   6 2096.69   84.49
  -5  -5   6 2436.66   88.59
  -5  -5   6 2295.27   87.89
   5   6  -6    8.70    4.70
  -5  -6   6    6.90    6.00
  -5  -6   6   14.20    7.20
  -5  -6   6   16.60    5.90
  -5  -6   6   13.10    6.20
  -5  -6   6   11.50    4.20
  -5  -6   6   13.80    6.40
  -5  -6   6    7.70    4.00
  -5  -6   6   13.90    4.80
  -5  -6   6   18.60    7.80
  -5  -6   6    8.90    4.90
  -5  -6   6    7.10    5.80
  -5  -6   6    4.60    4.00
  -5  -6   6    7.20    4.40
  -5  -6   6    0.90    3.20
   5   7  -6   41.10    8.40
  -5  -7   6   58.79   10.40
  -5  -7   6   73.99   14.30
  -5  -7   6   42.70    8.40
  -5  -7   6   65.19   13.20
  -5  -7   6   45.00    8.50
  -5  -7   6   56.39   10.10
  -5  -7   6   47.70    7.90
  -5  -7   6   53.09   12.70
  -5  -7   6   62.09   10.40
  -5  -7   6   51.69    9.20
  -5  -7   6   56.99    8.70
  -5  -8   6   21.00    6.50
  -5  -8   6   27.10    9.40
  -5  -8   6   21.70    7.30
  -5  -8   6   12.20    5.00
  -5  -8   6   22.90    6.40
  -5  -8   6   13.80    5.70
  -5  -8   6   19.80    6.50
   5   8   6   11.50    4.90
  -5  -8   6   21.40    5.30
  -5  -8   6   12.50    7.80
  -5  -9  -6   43.00    7.70
  -5  -9   6   40.80    6.90
   5   9   6   40.00    7.50
  -5  -9   6   40.90    8.60
  -5  -9   6   35.60    7.70
  -5  -9   6   53.79   11.10
  -5  -9   6   37.80    7.80
  -5  -9   6   42.30   10.20
  -5 -10   6   29.20    7.10
   5  11   6   27.70    4.60
   5  11   6   24.70    5.10
   5 -10  -7   26.30    5.40
   5 -10  -7   14.30    5.50
  -5  10   7   28.70    4.80
   5 -10   7   22.90    6.20
   5 -10   7   27.60    5.80
   5  -9  -7  469.55   24.70
   5  -9   7  456.35   24.10
   5  -9   7  479.35   23.60
  -5   9   7  449.06   22.30
   5  -9   7  425.66   24.10
   5  -8  -7   27.10    7.20
   5  -8   7   16.10    5.90
  -5   8   7   31.10    7.20
   5  -8   7   28.60    7.60
   5  -8   7   27.00    7.80
   5  -8   7   23.60    6.40
  -5   8   7   26.80    6.00
   5  -7  -7   61.29   11.60
   5  -7  -7   50.89   10.10
  -5   7   7   57.29   11.80
   5  -7   7   75.09   12.10
  -5   7   7   49.90    9.00
   5  -7   7   59.19   10.20
   5  -7   7   57.79   10.10
  -5   7   7   81.49   11.40
  -5   7   7   55.59    8.70
   5  -7   7   54.99   11.60
   5  -7   7   65.59   11.20
  -5   7   7   65.39   10.50
   5  -6  -7   10.90    6.00
   5  -6  -7   24.20    7.90
   5  -6  -7    6.30    3.70
  -5   6  -7   11.40    4.20
  -5   6   7   11.80    5.30
   5  -6   7   11.70    6.60
  -5   6   7   12.70    5.30
   5  -6   7    9.50    5.40
  -5   6   7    9.70    4.40
   5  -6   7    9.60    4.90
   5  -6   7    7.90    4.60
  -5   6   7   12.80    5.30
   5  -6   7   -1.30    3.80
   5  -6   7    8.30    4.20
  -5   5  -7 1841.92   70.49
   5  -5  -7 1854.41   71.79
   5  -5  -7 1926.01   79.79
   5  -5  -7 1945.51   78.69
   5  -5  -7 1965.30   72.99
   5  -5   7 1888.71   76.39
   5  -5   7 1851.21   75.29
  -5   5   7 1844.02   72.59
   5  -5   7 1872.31   73.89
   5  -5   7 1856.61   74.69
  -5   5   7 1904.01   71.49
   5  -5   7 1850.91   77.69
   5  -5   7 1857.81   72.79
  -5   4  -7   43.80    7.00
   5  -4  -7   46.40   10.40
   5  -4  -7   43.50    8.80
   5  -4  -7   55.49    9.00
  -5   4  -7   62.89    8.40
  -5   4  -7   46.40    9.50
   5  -4  -7   51.89    9.80
   5  -4   7   54.69   10.90
   5  -4   7   42.30    9.20
   5  -4   7   45.20    8.20
   5  -4   7   46.20    7.90
   5  -4   7   54.59    9.40
   5  -4   7   47.80    8.40
  -5   4   7   67.89    9.40
  -5   4   7   58.79    7.90
   5  -4   7   40.50    8.30
   5  -3  -7 1027.60   47.10
   5  -3  -7  987.40   44.10
  -5   3  -7 1064.99   45.70
   5  -3  -7 1008.50   46.00
   5  -3   7 1067.29   44.70
  -5   3   7  997.20   41.20
   5  -3   7 1058.99   45.90
   5  -2  -7   26.70    5.80
   5  -2  -7   22.10    6.00
   5  -2  -7   29.00    6.10
   5  -2  -7   31.90    7.20
   5  -2  -7   16.10    5.80
   5  -2  -7   26.30    7.30
   5  -2   7   27.60    7.00
  -5   2   7   27.60    6.70
   5  -2   7   32.50    7.30
   5  -2   7   30.00    6.70
   5  -1  -7  170.38   13.00
   5  -1  -7  156.28   10.80
   5  -1  -7  152.58   11.50
   5  -1  -7  157.08   13.30
   5  -1  -7  147.59   14.50
  -5   1   7  172.68   16.20
  -5   1   7  175.78   14.10
  -5   1   7  147.09   12.50
   5   0  -7    4.40    3.70
   5   0  -7    2.90    3.30
   5   0  -7    3.10    2.80
   5   0  -7   -2.30    3.40
   5   0  -7   -2.70    3.20
  -5   0   7    8.80    5.80
  -5   0   7    1.30    3.30
  -5   0   7    3.70    2.90
   5   1  -7  159.18   10.80
   5   1  -7  174.38   13.70
   5   1  -7  181.98   12.80
   5   1  -7  191.28   12.40
  -5  -1   7  168.78   13.00
  -5  -1   7  190.08   17.30
  -5  -1   7  164.18   14.60
  -5  -1   7  193.08   14.90
  -5  -1   7  197.18   14.80
  -5  -1   7  177.18   12.80
   5   2  -7   37.40    8.30
   5   2  -7   28.40    5.50
   5   2  -7   27.10    5.90
  -5  -2   7   27.90    7.60
  -5  -2   7   27.30    8.60
  -5  -2   7   30.40    7.70
  -5  -2   7   36.40    8.10
  -5  -2   7   18.70    7.40
  -5  -2   7   26.30    6.80
  -5  -2   7   23.00    5.90
  -5  -2   7   28.00    6.00
   5   3  -7 1128.69   47.90
   5   3  -7 1053.89   44.60
  -5  -3   7 1115.59   48.70
  -5  -3   7 1105.69   45.80
  -5  -3   7 1194.58   49.90
  -5  -3   7 1054.79   47.30
  -5  -3   7 1078.39   53.79
  -5  -3   7 1113.09   54.99
  -5  -3   7 1162.78   47.80
  -5  -3   7 1141.79   50.29
  -5  -3   7 1112.69   45.90
   5   4  -7   68.39    9.80
  -5  -4   7   52.89    9.60
  -5  -4   7   44.80   10.60
  -5  -4   7   50.69    8.10
  -5  -4   7   57.89    9.50
  -5  -4   7   38.60    8.70
  -5  -4   7   53.29   10.00
  -5  -4   7   46.10    7.60
  -5  -4   7   49.99   11.60
  -5  -4   7   40.00    8.30
  -5  -4   7   41.10    7.90
  -5  -4   7   68.19   10.10
  -5  -5   7 2047.20   79.69
  -5  -5   7 2083.19   83.69
  -5  -5   7 1992.40   77.59
  -5  -5   7 2191.08   82.19
  -5  -5   7 2069.59   81.09
  -5  -5   7 2142.59   82.29
  -5  -5   7 2005.10   87.59
  -5  -5   7 1983.10   77.49
  -5  -5   7 1972.20   77.29
  -5  -5   7 2142.09   90.09
  -5  -5   7 1912.91   84.59
   5   6  -7   14.90    7.10
   5   6  -7   17.70    5.90
  -5  -6   7    2.70    4.90
  -5  -6   7    5.70    4.50
  -5  -6   7   11.80    5.60
  -5  -6   7   14.40    5.00
  -5  -6   7   14.10    7.30
  -5  -6   7    4.70    3.90
  -5  -6   7   13.00    5.60
  -5  -6   7    5.40    5.90
  -5  -6   7    6.60    5.30
  -5  -6   7    5.50    4.60
  -5  -6   7   12.20    5.40
  -5  -6   7   18.80    6.90
  -5  -6   7   11.80    5.80
  -5  -7   7   54.69    8.80
  -5  -7   7   41.70    8.10
  -5  -7   7   57.19    9.80
  -5  -7   7   55.79   12.30
  -5  -7   7   35.10    9.20
  -5  -7   7   59.19    7.90
  -5  -7   7   45.60   11.00
  -5  -7   7   55.89   10.10
  -5  -7   7   39.00    8.20
  -5  -7   7   47.60    8.70
  -5  -8   7   19.80    5.60
  -5  -8   7   31.60    6.00
  -5  -8   7   37.60    9.50
  -5  -8   7   37.70    7.50
  -5  -8   7   23.60    6.50
  -5  -8   7   28.20    7.10
  -5  -8   7   32.20    7.40
  -5  -8   7   36.10    9.40
  -5  -9   7  463.15   26.10
  -5  -9   7  488.65   24.40
  -5  -9   7  492.55   26.10
  -5  -9   7  460.65   24.40
  -5  -9   7  457.55   22.90
   5  10   7   26.90    4.80
   5  -9  -8   41.80    7.00
   5  -9   8   48.80    8.40
  -5   9   8   45.20    5.80
   5  -9   8   42.10    7.40
   5  -9   8   53.69    7.60
   5  -8  -8   34.40    7.60
  -5   8   8   29.80    5.50
   5  -8   8   40.10    7.70
   5  -8   8   48.30    8.30
   5  -8   8   40.70    8.90
   5  -7  -8  346.97   23.30
   5  -7   8  377.56   21.80
   5  -7   8  345.97   20.70
  -5   7   8  339.37   18.70
   5  -7   8  345.47   20.30
   5  -7   8  349.07   22.00
  -5   7   8  337.47   20.70
   5  -6  -8   81.59   13.80
   5  -6  -8   97.99   14.90
   5  -6  -8   83.29    8.40
  -5   6  -8   83.89   11.30
  -5   6  -8  103.89   10.00
   5  -6   8   87.29   13.90
   5  -6   8   95.79   12.00
   5  -6   8   96.49   12.40
   5  -6   8   96.79   13.30
   5  -6   8   78.19   11.00
  -5   6   8  101.89    9.60
   5  -6   8  117.39   15.10
  -5   6   8   86.79    8.60
  -5   6   8   88.49   12.60
   5  -5  -8  224.98   19.50
  -5   5  -8  260.47   15.40
  -5   5  -8  242.88   15.40
   5  -5  -8  253.07   19.60
   5  -5  -8  224.58   15.80
   5  -5   8  269.87   18.20
  -5   5   8  253.57   18.40
   5  -5   8  257.87   19.60
   5  -5   8  265.97   18.70
   5  -5   8  245.68   16.50
  -5   5   8  237.98   14.80
   5  -5   8  254.77   16.70
  -5   5   8  255.47   15.20
   5  -5   8  262.67   17.50
   5  -4  -8  484.95   29.90
   5  -4  -8  458.65   25.10
   5  -4  -8  457.45   29.30
   5  -4  -8  498.15   28.10
  -5   4  -8  474.45   23.30
  -5   4  -8  479.15   23.40
   5  -4  -8  474.85   24.70
  -5   4  -8  444.86   25.60
   5  -4   8  433.36   25.50
  -5   4   8  477.85   27.00
   5  -4   8  462.15   24.30
   5  -4   8  514.35   27.80
   5  -4   8  498.85   26.00
   5  -4   8  459.25   27.40
   5  -4   8  485.15   25.00
  -5   4   8  486.55   22.30
   5  -3  -8  201.18   14.90
   5  -3  -8  159.08   14.70
   5  -3  -8  176.38   12.90
  -5   3  -8  177.38   14.70
   5  -3  -8  187.98   27.90
  -5   3  -8  219.58   17.70
  -5   3  -8  200.98   13.40
   5  -3   8  200.68   14.50
   5  -3   8  170.58   13.90
   5  -3   8  184.18   15.50
  -5   3   8  193.68   13.50
   5  -3   8  208.68   15.80
   5  -2  -8    2.90    4.10
   5  -2  -8    9.90    4.40
   5  -2  -8   12.70    5.00
   5  -2  -8   15.40    6.30
   5  -2   8   10.10    4.70
  -5   2   8    7.40    5.00
  -5   2   8   14.00    5.40
   5  -2   8   12.80    5.00
  -5   2   8    9.60    4.50
   5  -2   8   12.40    4.40
   5  -1  -8  612.54   30.60
   5  -1  -8  607.44   31.10
   5  -1  -8  608.44   29.30
   5  -1  -8  568.04   32.90
  -5   1   8  578.54   30.90
  -5   1   8  550.04   29.00
  -5   1   8  583.04   34.00
  -5   1   8  589.04   29.60
  -5   1   8  576.34   30.40
   5  -1   8  547.55   28.00
  -5   1   8  546.25   27.50
   5   0  -8  277.47   19.40
   5   0  -8  288.17   18.00
   5   0  -8  259.67   18.00
   5   0  -8  279.27   16.80
   5   0  -8  291.17   16.20
  -5   0   8  284.27   19.30
  -5   0   8  279.57   17.40
  -5   0   8  309.57   22.90
  -5   0   8  274.27   19.60
  -5   0   8  259.27   17.20
  -5   0   8  263.47   19.10
  -5   0   8  280.17   18.50
  -5   0   8  274.47   18.60
   5   1  -8  567.54   28.90
   5   1  -8  584.24   26.50
   5   1  -8  599.64   28.00
   5   1  -8  551.94   30.10
   5   1  -8  551.14   28.20
  -5  -1   8  560.64   30.20
  -5  -1   8  561.64   28.40
  -5  -1   8  634.84   36.40
  -5  -1   8  637.64   29.40
  -5  -1   8  567.14   27.90
  -5  -1   8  561.74   30.40
  -5  -1   8  550.34   28.30
  -5  -1   8  583.44   31.20
   5   2  -8    8.20    4.10
   5   2  -8   11.20    7.70
   5   2  -8    5.50    3.80
   5   2  -8    5.20    4.30
   5   2  -8   10.00    5.50
  -5  -2   8    6.00    4.50
  -5  -2   8    3.30    5.00
  -5  -2   8    5.50    4.80
  -5  -2   8    7.10    5.10
  -5  -2   8    5.90    5.10
  -5  -2   8    7.00    4.10
  -5  -2   8    9.00    4.50
   5   3  -8  210.78   24.70
   5   3  -8  206.38   14.10
   5   3  -8  221.28   19.30
  -5  -3   8  198.48   19.20
  -5  -3   8  207.58   15.60
  -5  -3   8  180.88   18.60
  -5  -3   8  211.08   16.40
  -5  -3   8  210.08   16.70
  -5  -3   8  179.48   13.70
  -5  -3   8  214.58   15.40
  -5  -3   8  194.88   16.30
   5   4  -8  557.84   29.30
   5   4  -8  554.84   33.90
   5   4  -8  544.25   26.20
  -5  -4   8  563.64   29.80
  -5  -4   8  555.44   28.60
  -5  -4   8  548.85   34.90
  -5  -4   8  552.64   28.80
  -5  -4   8  541.35   26.20
  -5  -4   8  553.74   30.70
  -5  -4   8  530.65   29.10
  -5  -4   8  549.54   26.70
  -5  -4   8  527.05   33.20
   5   5  -8  241.98   21.20
   5   5  -8  275.67   18.70
  -5  -5   8  282.87   19.20
  -5  -5   8  256.67   18.00
  -5  -5   8  278.97   20.30
  -5  -5   8  313.77   24.40
  -5  -5   8  291.87   23.00
  -5  -5   8  263.17   20.80
  -5  -5   8  237.78   16.20
  -5  -5   8  265.07   17.90
  -5  -5   8  270.87   19.20
   5   6  -8  120.89   19.20
  -5  -6   8   73.39    9.60
  -5  -6   8   87.39   15.10
  -5  -6   8   92.29    8.80
  -5  -6   8   68.79   11.10
  -5  -6   8   73.19   10.80
  -5  -6   8  105.29   13.60
  -5  -6   8   79.79   11.50
  -5  -6   8  113.69   10.60
  -5  -6   8  116.89   13.00
  -5  -6   8   94.19   15.60
  -5  -6   8   77.99   11.70
  -5  -7   8  356.66   21.70
  -5  -7   8  380.76   22.50
  -5  -7   8  385.36   23.00
  -5  -7   8  352.46   24.40
  -5  -7   8  368.66   19.90
  -5  -7   8  386.66   20.50
  -5  -7   8  356.36   21.90
  -5  -7   8  378.06   26.20
  -5  -8   8   30.40    6.60
  -5  -8   8   28.00    5.90
  -5  -8   8   24.60    7.30
  -5  -8   8   23.80    6.70
  -5  -8   8   37.80    7.20
  -5  -8   8   41.70    7.40
   5   9   8   49.10    6.30
  -5  -9   8   46.20    6.20
  -5  -9   8   45.00    7.00
  -5  -9   8   50.09    8.10
   5  -9  -9  250.57   14.30
   5  -9  -9  244.98   14.20
   5  -9   9  243.18   13.80
   5  -9   9  217.88   14.70
   5  -8  -9   -0.40    3.50
   5  -8   9    5.40    3.60
   5  -8   9    3.90    7.00
   5  -8   9   -2.10    2.50
   5  -8   9    0.70    3.70
   5  -7  -9   34.50    9.10
  -5   7   9   36.40    7.50
   5  -7   9   33.00    7.80
   5  -7   9   33.20    6.70
   5  -7   9   47.20    8.90
   5  -7   9   37.70    7.80
  -5   6  -9   10.00    5.30
   5  -6  -9    9.70    5.50
  -5   6  -9   37.20    9.20
   5  -6   9   17.80    5.70
   5  -6   9    9.00    5.50
   5  -6   9   12.20    4.40
   5  -6   9   11.30    5.60
  -5   6   9    8.60    5.30
  -5   5  -9  536.15   26.10
  -5   5  -9  546.05   28.00
  -5   5  -9  532.55   27.50
   5  -5  -9  529.65   31.90
   5  -5  -9  558.14   26.80
  -5   5  -9  555.04   25.80
   5  -5   9  548.55   27.00
  -5   5   9  567.04   30.00
   5  -5   9  546.65   28.60
  -5   5   9  488.85   26.40
   5  -5   9  559.04   29.90
   5  -5   9  551.64   27.00
   5  -5   9  585.64   28.00
  -5   4  -9   19.70    6.90
   5  -4  -9   14.00    7.50
  -5   4  -9   12.20    4.50
  -5   4  -9    5.90    3.80
  -5   4  -9    8.70    5.10
  -5   4  -9    6.50    7.00
   5  -4  -9    9.00    5.80
   5  -4  -9   10.40    6.40
   5  -4   9    4.80    4.40
  -5   4   9    6.70    4.20
   5  -4   9   12.90    5.00
   5  -4   9   -2.00    4.40
  -5   4   9    1.70    4.50
   5  -4   9    2.40    4.20
   5  -4   9   -0.90    3.50
   5  -3  -9  463.25   30.10
  -5   3  -9  512.65   26.40
   5  -3  -9  513.55   26.70
   5  -3  -9  490.95   29.00
   5  -3  -9  467.45   28.60
  -5   3  -9  471.15   26.20
   5  -3  -9  503.25   27.00
   5  -3   9  502.45   25.10
  -5   3   9  467.85   26.30
   5  -3   9  493.55   24.90
   5  -3   9  474.35   25.50
  -5   3   9  517.55   28.90
   5  -3   9  463.15   27.70
   5  -3   9  521.85   28.70
   5  -2  -9   25.60    7.60
   5  -2  -9   28.30    6.90
   5  -2  -9   33.80    9.20
   5  -2  -9   22.70    7.10
  -5   2  -9   33.00    7.80
  -5   2   9   27.40    7.40
   5  -2   9   21.90    6.00
  -5   2   9   22.80    6.20
   5  -2   9   34.40    8.50
  -5   2   9   26.90    6.60
   5  -2   9   23.20    7.60
  -5   2   9   25.30    8.20
   5  -1  -9  834.82   37.20
   5  -1  -9  784.82   39.40
   5  -1  -9  747.53   35.60
   5  -1  -9  797.42   38.90
  -5   1   9  762.62   36.50
  -5   1   9  779.72   39.20
  -5   1   9  727.13   35.90
   5  -1   9  740.93   35.20
   5   0  -9   -0.40    3.10
   5   0  -9    3.10    4.00
   5   0  -9    7.70    4.30
   5   0  -9   -2.80    2.60
  -5   0   9    3.80    4.60
  -5   0   9   -3.60    3.60
  -5   0   9   -0.60    2.50
  -5   0   9    0.10    3.40
  -5   0   9    0.90    3.70
  -5   0   9    6.60    5.00
  -5   0   9    2.60    4.30
   5   1  -9  806.82   37.20
   5   1  -9  812.22   38.00
   5   1  -9  773.62   39.00
  -5  -1   9  770.02   37.90
  -5  -1   9  774.52   36.40
  -5  -1   9  749.92   36.40
  -5  -1   9  763.02   38.40
  -5  -1   9  803.22   36.30
  -5  -1   9  847.42   36.60
  -5  -1   9  795.72   39.30
  -5  -1   9  782.32   43.30
   5   2  -9   30.70    6.30
   5   2  -9   27.00    6.80
   5   2  -9   49.60    9.80
   5   2  -9   17.70    6.00
  -5  -2   9   28.10    6.70
  -5  -2   9   25.70    7.10
  -5  -2   9   25.70    7.80
  -5  -2   9   15.80    7.20
  -5  -2   9   26.80    6.20
  -5  -2   9   30.50    7.30
  -5  -2   9   20.90    8.30
  -5  -2   9   25.70    6.80
   5   3  -9  538.95   27.00
   5   3  -9  502.55   29.00
   5   3  -9  527.05   24.40
   5   3  -9  532.45   33.10
  -5  -3   9  519.95   25.50
  -5  -3   9  548.85   29.60
  -5  -3   9  529.15   27.90
  -5  -3   9  512.05   27.40
  -5  -3   9  568.94   35.30
  -5  -3   9  508.35   28.60
  -5  -3   9  522.05   29.80
  -5  -4   9   10.20    4.50
  -5  -4   9    7.40    4.30
  -5  -4   9   10.40    5.20
  -5  -4   9   -0.90    4.40
  -5  -4   9    5.70    4.80
  -5  -4   9    6.40    5.20
  -5  -4   9    4.30    3.90
  -5  -4   9    1.20    2.30
  -5  -5   9  627.54   30.40
  -5  -5   9  621.74   31.50
  -5  -5   9  579.54   30.20
  -5  -5   9  630.04   33.10
  -5  -5   9  631.04   37.70
  -5  -5   9  620.24   28.70
  -5  -5   9  585.94   31.70
  -5  -5   9  598.04   33.70
  -5  -5   9  610.94   27.90
  -5  -6   9   14.20    4.60
  -5  -6   9    9.00    4.50
  -5  -6   9    7.40    4.40
  -5  -6   9   16.60    7.30
  -5  -6   9    0.80    2.60
  -5  -6   9    8.80    4.70
  -5  -6   9   22.10    6.40
  -5  -6   9    9.70    4.30
  -5  -6   9   10.10    4.40
  -5  -7   9   34.00    7.60
  -5  -7   9   38.00    7.20
  -5  -7   9   32.80    6.90
  -5  -7   9   26.10    7.10
  -5  -7   9   28.50    6.00
  -5  -7   9   36.40    6.90
  -5  -8   9    0.80    2.30
  -5  -8   9   -0.60    2.60
  -5  -8   9    3.60    3.20
  -5  -8   9    5.30    4.10
  -5  -8   9    3.00    2.90
  -5  -9   9  245.68   13.50
  -5  -9   9  229.98   15.60
   5  -8 -10   15.60    5.30
   5  -8  10   22.70    5.40
  -5   8  10   26.20    4.20
   5  -8  10   22.80    5.40
   5  -7 -10  214.48   15.30
  -5   7 -10  201.18   14.10
   5  -7  10  236.28   14.50
   5  -7  10  210.48   14.20
  -5   6 -10   39.50    7.20
   5  -6 -10   42.60    8.60
  -5   6 -10   49.70    9.70
   5  -6  10   38.50    6.60
   5  -6  10   37.90    6.40
  -5   6  10   39.00    6.20
   5  -6  10   32.60    7.20
   5  -6  10   45.60    8.90
   5  -5 -10   45.40   10.30
  -5   5 -10   23.10    7.00
   5  -5 -10   17.60    5.00
  -5   5 -10   47.40   12.70
  -5   5 -10   27.20    6.70
   5  -5  10   26.40    6.30
   5  -5  10   15.00    6.00
   5  -5  10   17.80    6.60
   5  -5  10   27.00    5.90
   5  -4 -10   25.30    6.40
   5  -4 -10   13.40    7.20
  -5   4 -10   34.30    8.30
  -5   4 -10   39.50    8.10
  -5   4  10   27.90    6.80
   5  -4  10   27.30    7.60
   5  -4  10   30.10    6.70
   5  -4  10   48.40    8.30
   5  -4  10   20.60    5.70
   5  -4  10   40.40    8.60
  -5   4  10   26.70    5.90
   5  -3 -10  302.37   19.10
  -5   3 -10  278.27   19.00
  -5   3 -10  272.57   17.70
  -5   3  10  268.87   17.50
   5  -3  10  281.47   19.30
   5  -3  10  272.37   17.00
   5  -3  10  293.87   17.50
   5  -3  10  293.27   17.20
  -5   3  10  273.17   17.40
  -5   2 -10   25.50    6.60
  -5   2  10   13.20    4.40
   5  -2  10    7.00    5.80
   5  -2  10    6.50    5.30
   5  -2  10   17.00    5.00
  -5   2  10   14.90    4.90
   5  -1 -10  279.57   18.80
   5  -1 -10  259.27   21.60
  -5   1  10  276.17   17.80
  -5   1  10  267.37   18.10
   5  -1  10  291.87   19.90
  -5   1  10  304.37   21.00
   5  -1  10  247.98   16.50
  -5   1  10  286.67   18.20
   5   0 -10   85.19   12.70
   5   0 -10  101.39   12.30
   5   0 -10   63.19    9.70
  -5   0  10   71.49   10.40
  -5   0  10   74.09   10.40
  -5   0  10   93.29   13.10
  -5   0  10  101.39   12.30
  -5   0  10   74.69    9.90
  -5   0  10   69.69   11.30
  -5   0  10   78.59   11.30
   5   1 -10  270.47   17.00
   5   1 -10  284.67   19.50
   5   1 -10  310.47   21.90
   5   1 -10  288.67   18.60
  -5  -1  10  322.47   18.20
  -5  -1  10  284.47   18.10
  -5  -1  10  258.57   17.40
  -5  -1  10  273.97   19.30
  -5  -1  10  265.67   18.90
  -5  -1  10  296.37   20.70
  -5  -1  10  260.97   17.60
   5   2 -10   22.80    6.80
   5   2 -10   20.20    5.90
   5   2 -10   24.80    6.10
   5   2 -10   11.90    6.30
   5   2 -10   11.70    5.60
  -5  -2  10   22.50    6.00
  -5  -2  10   15.10    6.20
  -5  -2  10   15.10    6.00
  -5  -2  10   17.60    6.90
  -5  -2  10   23.00    6.20
  -5  -2  10   13.00    5.40
  -5  -2  10   20.70    5.90
  -5  -2  10   13.90    5.90
   5   3 -10  260.17   17.50
   5   3 -10  292.27   16.50
   5   3 -10  278.87   18.20
   5   3 -10  308.67   18.50
  -5  -3  10  280.17   19.00
  -5  -3  10  282.57   18.30
  -5  -3  10  275.97   23.30
  -5  -3  10  318.77   20.70
  -5  -3  10  290.17   19.60
  -5  -3  10  284.77   17.00
  -5  -3  10  294.97   18.50
   5   4 -10   34.30    6.20
   5   4 -10   27.90    7.50
  -5  -4  10   26.40    7.50
  -5  -4  10    9.20    5.40
  -5  -4  10   22.20    7.90
  -5  -4  10   19.00    5.50
  -5  -4  10   11.40    5.40
  -5  -4  10   28.30    5.90
  -5  -4  10   20.20    6.90
  -5  -5  10   21.10    5.80
  -5  -5  10   22.70    8.00
  -5  -5  10   27.10    7.20
  -5  -5  10   27.00    5.80
  -5  -5  10   20.00    4.60
  -5  -5  10   23.00    6.60
  -5  -5  10   24.70    6.90
  -5  -5  10   16.50    6.10
  -5  -5  10   33.20    8.70
  -5  -6  10   32.70    6.60
  -5  -6  10   25.10    6.30
  -5  -6  10   42.90    6.20
  -5  -6  10   41.40    9.10
  -5  -6  10   28.70    5.90
  -5  -6  10   27.40    6.40
  -5  -6  10   47.10    8.30
  -5  -7  10  205.78   14.20
  -5  -7  10  215.28   13.10
  -5  -7  10  225.68   12.80
  -5  -7  10  233.08   14.40
  -5  -7  10  210.58   13.80
  -5  -8  10   27.00    3.80
  -5  -8  10   15.90    3.50
  -5  -8  10   17.90    4.10
  -5  -8  10   17.30    4.70
  -5   6 -11   84.89   10.10
  -5   6 -11  111.39   10.60
   5  -6 -11   97.99   11.40
   5  -6  11   83.69    8.50
  -5   6  11   94.49    9.20
   5  -6  11  100.69    9.20
  -5   6  11  107.49    9.10
   5  -5 -11  143.39   23.00
  -5   5 -11  109.69    9.70
  -5   5 -11  152.18   11.50
   5  -5 -11  119.49    8.60
  -5   5 -11  135.39   12.20
   5  -5  11  115.49   10.90
   5  -5  11  125.79   10.00
   5  -5  11  129.69   11.20
  -5   5  11  125.69   11.90
  -5   4 -11   14.30    7.90
  -5   4 -11    9.90    4.40
  -5   4 -11    0.60    4.10
   5  -4 -11   -0.80    3.50
   5  -4  11    8.00    3.30
  -5   4  11   -0.30    3.30
  -5   4  11   -2.00    3.10
  -5   4  11    1.40    2.40
   5  -4  11    5.80    4.70
   5  -4  11   -1.90    3.20
   5  -3 -11  546.45   26.80
  -5   3 -11  543.75   26.50
   5  -3  11  522.25   24.50
  -5   3  11  489.05   24.50
   5  -3  11  551.64   28.30
  -5   3  11  561.54   29.30
   5  -3  11  522.55   26.60
   5  -3  11  537.15   24.80
  -5   2 -11   14.50    5.50
   5  -2  11   13.20    5.70
   5  -2  11    9.50    4.40
   5  -2  11   13.10    5.30
   5  -1  11  274.37   18.60
  -5   1  11  293.87   17.70
  -5   1  11  266.77   16.40
   5   0 -11    1.30    4.20
   5   0 -11    3.80    3.70
  -5   0  11    2.40    3.30
  -5   0  11   -2.30    3.80
  -5   0  11    5.60    4.00
  -5   0  11   -0.30    2.10
  -5   0  11    1.60    2.90
  -5   0  11   -1.10    3.50
  -5   0  11   -0.40    3.40
   5   1 -11  280.27   16.90
   5   1 -11  304.57   18.40
  -5  -1  11  285.47   19.50
  -5  -1  11  273.27   16.80
  -5  -1  11  274.37   17.70
  -5  -1  11  291.07   16.80
  -5  -1  11  295.27   17.00
  -5  -1  11  242.58   17.60
  -5  -1  11  271.57   16.90
   5   2 -11   10.80    4.80
   5   2 -11   13.20    4.70
  -5  -2  11   13.30    5.40
  -5  -2  11    4.70    4.40
  -5  -2  11    9.60    4.60
  -5  -2  11    9.40    4.10
  -5  -2  11   11.90    5.00
  -5  -2  11   17.40    6.00
   5   3 -11  587.24   27.60
  -5  -3  11  565.04   29.40
  -5  -3  11  555.54   28.00
  -5  -3  11  550.44   29.00
  -5  -3  11  563.44   25.70
  -5  -3  11  579.54   27.10
  -5  -3  11  537.25   26.80
   5   4 -11    3.00    3.80
   5   4 -11    5.80    3.60
   5   4 -11   11.90    5.40
  -5  -4  11    8.50    5.20
  -5  -4  11   -3.10    3.10
  -5  -4  11    3.20    4.20
  -5  -4  11    3.10    2.40
  -5  -4  11   -2.00    3.30
  -5  -4  11   -0.90    3.80
  -5  -4  11    2.80    2.70
  -5  -4  11   -2.20    3.10
   5   5 -11  133.19   11.70
  -5  -5  11  125.89    9.60
  -5  -5  11  113.79   10.40
  -5  -5  11  128.19    9.10
  -5  -5  11  111.49   10.30
  -5  -5  11  112.19   16.80
  -5  -6  11  105.19    9.30
  -5  -6  11   91.59    8.70
  -5  -6  11  104.69    8.40
  -5  -6  11  100.39    8.80
  -5  -6  11   84.19    7.20
  -5   5 -12  120.49    9.30
  -5   5 -12  138.29   10.60
   5  -5  12  120.29    9.10
  -5   5  12  128.59    9.40
   5  -5  12  122.19    9.30
  -5   5  12  143.69    9.10
  -5   4 -12   28.40    7.00
   5  -4 -12   29.60    5.30
  -5   4 -12   40.60    7.60
  -5   4 -12   32.40    7.70
  -5   4  12   32.50    6.30
   5  -4  12   32.80    6.30
   5  -4  12   32.60    5.80
  -5   4  12   34.30    6.00
  -5   4  12   29.00    5.40
  -5   3 -12   10.70    4.50
  -5   3 -12   13.70    6.20
   5  -3  12    6.00    4.30
   5  -3  12    6.10    3.80
  -5   3  12    3.60    3.60
   5  -2  12   19.20    5.70
  -5   1  12   65.19    6.80
   5  -1  12   78.49   10.40
   5   0 -12  100.99   17.40
  -5   0  12  103.39   10.40
  -5   0  12   83.79    7.70
  -5   0  12   89.59    8.70
  -5   0  12   86.59    7.50
  -5   0  12  100.59   10.10
   5   1 -12   84.09   10.10
   5   1 -12   97.19    8.40
  -5  -1  12   73.29    9.80
  -5  -1  12   72.99    7.30
  -5  -1  12   89.29    8.50
  -5  -1  12   78.89    8.10
  -5  -1  12   96.89    8.60
  -5  -1  12   72.89    8.60
   5   2 -12   21.20    5.40
  -5  -2  12   16.70    4.90
  -5  -2  12   19.00    4.20
  -5  -2  12   11.20    6.50
  -5  -2  12   21.10    4.30
  -5  -2  12   26.20    5.60
   5   3 -12    9.00    4.30
   5   3 -12   11.80    4.30
  -5  -3  12    2.40    3.10
  -5  -3  12    6.60    2.70
  -5  -3  12    8.70    4.00
  -5  -3  12   -1.20    2.80
  -5  -3  12    6.10    2.70
  -5  -3  12    4.50    3.50
   5   4 -12   44.90    7.50
   5   4 -12   34.20    7.80
  -5  -4  12   19.60    4.80
  -5  -4  12   24.10    5.10
  -5  -4  12   21.70    4.80
  -5  -4  12   21.70    3.90
  -5  -4  12   32.60    5.50
  -5  -4  12   28.40    5.40
  -5  -5  12  138.89    9.10
  -5  -5  12  136.59    9.90
  -5  -5  12  140.29    9.80
  -5   1  13    4.60    3.20
   5  -1  13    7.70    3.60
   5   0 -13    3.20    3.40
  -5   0  13    4.00    3.00
  -5   0  13    2.10    2.50
   5   1 -13   10.50    4.80
  -5  -1  13    6.40    3.40
  -5  -1  13   10.30    3.20
  -5  -1  13   11.00    2.60
  -6  12   0  360.26   17.00
   6 -12   0  344.77   18.20
  -6  11   0    0.20    2.80
  -6  11   0    5.90    3.60
  -6  11   0    4.80    4.40
   6 -11   0    7.70    5.30
  -6  10   0  443.76   23.60
  -6  10   0  439.26   21.70
  -6  10   0  439.76   23.90
   6 -10   0  445.06   24.80
  -6   9   0   -3.90    3.60
  -6   9   0    8.10    4.50
   6  -9   0    4.10    5.50
  -6   9   0    2.00    2.60
   6  -9   0    5.90    3.80
  -6   9   0    4.00    3.10
  -6   8   0 1549.74   59.99
  -6   8   0 1555.54   63.29
   6  -8   0 1522.55   69.79
   6  -8   0 1645.14   61.39
   6  -8   0 1567.24   64.39
   6  -7   0    3.50    4.30
  -6   7   0    9.20    4.30
  -6   7   0    3.90    3.30
  -6   7   0    7.90    5.40
   6  -7   0    7.60    3.90
  -6   7   0    5.20    3.70
  -6   6   0  591.84   26.90
   6  -6   0  624.24   28.90
   6  -6   0  584.44   30.70
  -6   6   0  599.44   27.10
  -6   6   0  578.44   25.80
   6  -5   0    0.10    3.40
  -6   5   0    0.90    2.50
  -6   5   0    1.70    2.60
   6  -3   0    6.30    3.50
  -6   3   0    4.90    3.30
   6  -3   0    6.80    2.60
  -6   2   0 1045.80   39.00
  -6   2   0 1033.50   39.00
   6  -2   0 1013.80   39.30
   6  -2   0 1026.30   39.10
   6  -2   0 1007.60   38.00
   6  -1   0    2.10    2.30
  -6   1   0    9.40    3.40
   6  -1   0    8.20    2.30
   6  -1   0    6.60    2.50
   6   0   0  297.57   13.10
   6   0   0  309.47   13.60
   6   0   0  299.27   13.70
  -6  -1   0    2.40    2.00
   6   1   0    3.60    2.10
   6   1   0    5.90    2.70
   6   2   0 1099.39   40.30
   6   2   0 1102.59   41.50
   6   3   0    8.00    2.50
   6   3   0    5.20    2.60
  -6  -3   0    3.60    3.00
   6   3   0    6.70    2.70
   6   4   0  745.53   28.40
  -6  -4   0  640.64   29.90
   6   4   0  688.43   27.60
   6   4   0  758.42   29.00
   6   5   0    1.40    2.40
   6   5   0    3.30    1.80
  -6  -6   0  566.64   30.10
   6   6   0  628.24   27.00
  -6  -6   0  585.04   28.00
  -6  -6   0  617.44   26.60
   6   6   0  658.63   26.60
  -6  -7   0   -2.50    5.20
  -6  -7   0    4.60    5.70
   6   7   0   -0.20    2.10
  -6  -7   0    3.80    4.60
  -6  -7   0    8.00    4.40
  -6  -7   0   -2.10    3.60
  -6  -8   0 1601.54   64.29
  -6  -8   0 1630.14   66.99
  -6  -8   0 1698.93   72.49
  -6  -8   0 1601.34   73.19
  -6  -8   0 1606.04   66.99
  -6  -8   0 1642.24   74.79
   6   9   0    5.40    3.10
  -6  -9   0    3.00    4.50
  -6  -9   0    2.60    8.00
  -6  -9   0    5.40    4.70
  -6  -9   0    3.50    3.50
  -6  -9   0    2.40    5.70
  -6 -10   0  400.96   27.20
  -6 -10   0  372.86   24.70
  -6 -10   0  423.56   23.70
  -6 -10   0  389.46   27.60
  -6 -11   0    6.10    6.30
  -6 -11   0    1.90    5.40
   6  11   0   10.80    4.90
  -6 -12   0  301.67   19.40
  -6 -12   0  324.67   19.70
  -6  12  -1    9.20    3.80
  -6  12  -1   10.20    3.60
   6 -12   1   14.20    5.10
  -6  12   1   10.70    3.30
  -6  12   1   10.50    4.50
  -6  11  -1   12.80    4.50
  -6  11  -1   15.20    5.60
  -6  11  -1   15.50    4.40
   6 -11  -1   18.60    6.30
   6 -11   1    6.20    5.10
  -6  11   1    7.50    3.70
  -6  11   1    9.50    6.20
  -6  11   1   11.30    4.10
  -6  10  -1  538.25   24.50
  -6  10  -1  545.85   27.80
   6 -10  -1  552.94   28.30
  -6  10  -1  577.74   27.80
   6 -10  -1  481.55   26.80
  -6  10   1  539.35   26.80
   6 -10   1  525.95   28.50
  -6  10   1  479.35   26.50
  -6  10   1  553.54   25.20
   6  -9  -1   51.69    9.20
  -6   9  -1   77.99   11.70
   6  -9  -1   49.40    7.30
   6  -9  -1   45.70    9.60
  -6   9  -1   51.19    8.00
  -6   9  -1   53.79    9.20
  -6   9  -1   86.89    9.90
  -6   9   1   72.29   11.80
   6  -9   1   61.49   10.30
  -6   9   1   64.49   10.00
  -6   9   1   50.09    8.50
   6  -9   1   57.79   13.10
  -6   9   1   68.59    9.20
   6  -9   1   65.99    9.80
  -6   8  -1    5.30    3.60
  -6   8  -1    2.30    3.90
   6  -8  -1    9.80    5.20
   6  -8  -1   13.70    7.10
  -6   8  -1    6.30    4.70
   6  -8  -1    1.30    3.60
  -6   8   1    6.60    4.00
  -6   8   1    2.50    3.80
  -6   8   1    5.70    4.80
  -6   8   1   11.60    5.40
   6  -8   1    4.80    4.80
  -6   8   1   10.60    4.80
   6  -8   1   11.40    6.30
  -6   7  -1  211.68   13.10
   6  -7  -1  205.28   18.00
  -6   7  -1  206.28   14.40
  -6   7  -1  192.68   13.10
   6  -7  -1  193.88   14.90
   6  -7  -1  221.08   14.70
   6  -7   1  208.08   15.50
  -6   7   1  221.88   14.30
  -6   7   1  178.88   14.30
   6  -7   1  209.68   13.10
   6  -7   1  201.28   14.60
  -6   7   1  206.28   12.90
  -6   7   1  204.18   13.90
   6  -7   1  195.18   16.70
   6  -6  -1  668.33   32.10
   6  -6  -1  718.13   32.00
  -6   6  -1  729.53   30.70
   6  -6  -1  706.73   35.00
  -6   6  -1  694.33   30.60
  -6   6  -1  682.63   29.50
  -6   6   1  693.03   29.60
  -6   6   1  753.52   31.40
   6  -6   1  703.63   41.40
  -6   6   1  676.03   30.60
   6  -6   1  690.43   34.60
  -6   5  -1   13.90    4.20
  -6   5  -1   19.40    5.30
   6  -5  -1   13.30    5.00
  -6   5  -1    9.20    3.70
  -6   5   1   21.70    5.20
   6  -5   1   21.20    5.70
  -6   5   1   18.00    5.00
  -6   5   1   18.50    4.60
   6  -3  -1   27.00    4.60
   6  -3  -1   26.30    6.90
   6  -3  -1   33.00    5.70
  -6   3   1   24.40    4.50
  -6   3   1   23.50    4.50
  -6   2  -1 3113.79  107.69
   6  -2  -1 3058.99  107.09
   6  -2  -1 2991.30  106.59
  -6   2  -1 3199.08  107.79
   6  -2  -1 3163.38  106.99
   6  -2  -1 3051.09  108.09
   6  -2  -1 2973.20  107.69
  -6   2   1 3257.97  107.69
  -6   2   1 2975.20  107.79
   6  -2   1 3003.50  106.59
   6  -2   1 3110.89  108.89
   6  -2   1 2853.41  107.29
  -6   2   1 2986.30  107.09
   6  -1  -1   67.79    5.20
   6  -1  -1   55.79    4.90
   6  -1  -1   70.79    5.90
   6  -1  -1   68.59    5.40
  -6   1  -1   82.39    8.20
   6  -1   1   70.19    6.10
  -6   1   1   76.29    5.90
   6  -1   1   69.29    5.70
   6  -1   1   76.49    5.50
  -6   1   1   69.79    5.40
  -6   1   1   71.49    5.80
   6   0  -1    1.90    1.90
   6   0  -1    2.20    2.10
   6   0  -1    0.10    1.60
   6   0  -1   -0.10    2.00
   6   0   1   -0.30    2.10
  -6   0   1    0.80    1.90
   6   0   1   -0.50    1.90
  -6   0   1   -0.40    2.20
   6   0   1   -0.80    2.10
   6   1  -1   62.99    5.40
   6   1  -1   68.29    5.30
   6   1  -1   59.79    4.90
   6   1   1   70.49    5.10
  -6  -1   1   56.29    6.60
   6   2  -1 3285.77  113.09
   6   2  -1 3318.87  113.79
  -6  -2   1 3109.69  115.09
   6   2   1 3165.58  113.59
   6   2   1 3394.06  114.99
   6   3  -1   28.70    4.20
   6   3  -1   22.90    3.60
   6   3  -1   25.60    4.00
  -6  -3   1   27.90    5.30
   6   3   1   17.50    3.70
   6   4  -1 2748.43   93.49
   6   4   1 2657.83   93.79
  -6  -4   1 2498.55   95.49
   6   4   1 2613.54   94.89
   6   4   1 2718.33   93.29
   6   4   1 2533.15   94.59
   6   5  -1   13.10    3.30
  -6  -5   1   22.80    5.50
  -6  -5   1   21.20    5.20
   6   5   1   11.90    3.60
   6   5   1   18.90    4.10
   6   5   1    9.10    3.20
  -6  -6  -1  674.13   33.30
  -6  -6   1  710.93   32.70
  -6  -6   1  648.84   30.80
   6   6   1  732.73   31.40
   6   6   1  708.63   30.40
   6   6   1  726.53   29.40
  -6  -6   1  762.32   40.90
  -6  -6   1  734.83   32.90
  -6  -6   1  765.42   41.20
  -6  -6   1  732.33   37.40
  -6  -7  -1  221.48   16.40
  -6  -7  -1  218.18   20.80
  -6  -7  -1  214.98   17.90
  -6  -7  -1  209.68   16.10
  -6  -7  -1  221.98   13.50
  -6  -7   1  216.48   20.40
  -6  -7   1  183.68   14.90
  -6  -7   1  208.78   15.30
   6   7   1  222.08   12.60
   6   7   1  217.48   14.00
  -6  -7   1  233.98   21.20
  -6  -7   1  214.48   15.30
  -6  -7   1  232.78   19.30
   6   7   1  199.68   13.50
  -6  -8  -1   14.10    6.90
  -6  -8  -1    9.20    5.20
  -6  -8  -1    1.40    3.60
  -6  -8  -1    3.90    5.30
  -6  -8  -1   14.70    8.50
  -6  -8   1   12.60    4.50
  -6  -8   1    5.90    7.40
  -6  -8   1    2.90    3.30
  -6  -8   1    7.40    6.20
  -6  -8   1    4.20    5.00
   6   8   1    4.20    3.80
  -6  -8   1    9.50    5.20
   6   8   1    6.00    3.70
  -6  -9  -1   61.99   14.10
  -6  -9  -1   66.49   11.40
  -6  -9  -1   69.69   12.40
  -6  -9  -1   76.49   14.50
  -6  -9  -1   55.89   11.60
  -6  -9   1   42.80    8.60
  -6  -9   1   57.99   13.50
   6   9   1   52.69    9.70
  -6  -9   1   55.59   13.40
  -6  -9   1   53.69   11.50
  -6  -9   1   59.99   10.70
   6   9   1   57.39    8.20
   6   9   1   60.59    8.00
  -6 -10  -1  460.25   29.00
  -6 -10  -1  500.25   32.70
  -6 -10  -1  543.75   28.40
  -6 -10  -1  517.35   31.70
   6  10   1  536.05   25.80
   6  10   1  533.75   23.90
  -6 -10   1  552.44   32.80
   6  10   1  515.45   26.60
  -6 -10   1  529.95   27.20
  -6 -10   1  487.95   29.30
  -6 -10   1  532.25   32.60
  -6 -11  -1    9.90    6.70
  -6 -11  -1    5.10    6.20
   6  11   1   20.90    5.70
  -6 -11   1    3.30    6.00
   6  11   1    8.50    3.20
   6  11   1    8.40    3.80
  -6 -12  -1    9.50    5.40
  -6 -12   1   15.30    5.70
  -6 -12   1   16.90    4.80
   6  12   1   14.90    4.40
  -6  12  -2  323.97   16.30
  -6  12   2  326.57   16.00
  -6  12   2  342.57   16.70
   6 -12   2  346.97   17.60
   6 -11  -2   20.50    5.20
  -6  11  -2   14.30    5.50
   6 -11  -2   17.90    6.00
  -6  11  -2   10.50    5.90
  -6  11  -2   18.10    4.70
  -6  11   2   16.80    4.60
  -6  11   2   12.40    4.00
   6 -11   2    6.50    5.10
  -6  11   2   22.40    8.10
   6 -11   2   18.20    9.30
   6 -10  -2  241.98   16.70
  -6  10  -2  232.38   15.90
  -6  10  -2  235.08   13.90
  -6  10  -2  246.98   16.70
   6 -10  -2  220.18   16.50
  -6  10   2  231.58   14.10
   6 -10   2  217.58   15.60
  -6  10   2  216.28   15.40
  -6  10   2  229.08   16.50
   6 -10   2  228.88   17.40
   6  -9  -2   53.79    9.80
   6  -9  -2   35.50    6.90
  -6   9  -2   45.60   10.00
  -6   9  -2   37.70    6.60
  -6   9  -2   49.90    8.10
  -6   9   2   31.70    7.40
  -6   9   2   47.50    7.80
  -6   9   2   28.60    7.00
   6  -9   2   33.60    8.60
  -6   9   2   28.30    7.50
   6  -9   2   36.50    8.10
  -6   8  -2  187.98   13.00
   6  -8  -2  161.08   14.70
   6  -8  -2  178.38   14.10
  -6   8  -2  188.78   13.00
  -6   8   2  188.58   12.90
  -6   8   2  164.28   13.80
   6  -8   2  206.48   15.00
  -6   8   2  185.58   15.10
  -6   8   2  168.98   14.10
  -6   8   2  202.38   14.50
   6  -8   2  201.58   15.70
   6  -8   2  195.08   18.20
   6  -7  -2    6.30    4.30
   6  -7  -2    8.50    4.80
  -6   7  -2   13.20    5.70
  -6   7  -2    5.50    3.70
   6  -7   2    7.10    4.90
  -6   7   2   12.00    5.60
   6  -7   2    3.10    4.80
  -6   7   2   12.70    4.90
  -6   7   2    6.10    3.90
  -6   7   2    8.50    4.00
   6  -7   2    6.20    5.00
  -6   7   2    4.30    3.50
   6  -7   2    4.10    2.90
   6  -7   2    9.90    5.40
  -6   6  -2 1951.10   72.09
   6  -6  -2 2002.90   78.59
  -6   6  -2 1811.02   72.69
  -6   6  -2 1955.70   72.79
   6  -6  -2 1895.51   75.49
   6  -6   2 1923.91   77.99
  -6   6   2 2023.90   74.69
   6  -6   2 1918.01   75.19
  -6   6   2 1916.81   73.59
  -6   6   2 2030.40   76.99
  -6   5  -2   26.10    5.60
   6  -5  -2   32.30    7.20
  -6   5  -2   37.10    6.40
  -6   5  -2   30.60    5.70
  -6   5   2   24.40    5.40
   6  -5   2   17.80    5.80
  -6   5   2   23.40    5.20
  -6   5   2   31.90    6.00
   6  -4  -2  858.71   36.10
   6  -4  -2  840.92   32.70
  -6   4  -2  777.72   33.60
   6  -4  -2  900.71   35.10
   6  -3  -2  204.68   11.80
   6  -3  -2  214.88   12.20
   6  -3  -2  189.98   10.80
   6  -3  -2  184.28   11.40
  -6   3   2  184.28   10.90
   6  -2  -2  708.83   29.10
   6  -2  -2  727.03   28.20
  -6   2  -2  706.83   30.60
   6  -2  -2  687.03   27.40
   6  -2  -2  727.33   28.30
   6  -2   2  701.63   29.60
   6  -2   2  676.93   27.50
  -6   2   2  669.03   27.40
  -6   2   2  758.82   28.40
   6  -1  -2   90.09    6.80
   6  -1  -2   90.99    6.20
   6  -1  -2   97.99    7.20
   6  -1  -2   97.89    6.80
  -6   1   2   87.59    6.40
   6  -1   2  103.99    7.80
   6   0  -2   25.00    3.70
   6   0  -2   19.00    3.80
   6   0  -2   18.80    3.70
  -6   0   2    9.00    3.30
  -6   0   2   13.70    2.80
  -6   0   2    7.10    2.50
   6   1  -2   98.69    6.60
   6   1  -2   92.39    6.10
   6   1  -2  102.99    6.90
  -6  -1   2   95.79    8.70
   6   2  -2  801.52   28.80
   6   2  -2  736.53   28.40
   6   2  -2  707.13   27.60
  -6  -2   2  682.23   29.80
   6   2   2  740.33   29.20
   6   3  -2  189.28    9.70
   6   3   2  165.18    9.70
  -6  -4   2  927.91   36.20
  -6  -4   2  853.01   35.50
   6   4   2  805.12   33.70
   6   4   2  879.71   35.70
  -6  -5   2   27.10    5.70
   6   5   2   19.10    4.80
  -6  -5   2   32.60    6.20
   6   5   2   25.60    5.00
  -6  -5   2   32.10    6.20
  -6  -6  -2 1855.71   76.19
  -6  -6  -2 1957.40   76.09
  -6  -6  -2 1913.61   77.79
   6   6   2 2025.60   74.99
   6   6   2 2062.09   75.99
   6   6   2 1978.40   73.29
  -6  -6   2 2039.50   78.89
  -6  -6   2 2162.28   86.59
  -6  -6   2 2051.99   82.19
  -6  -6   2 2068.29   83.79
  -6  -6   2 1905.41   75.59
  -6  -6   2 2023.60   76.49
  -6  -6   2 1908.61   77.09
  -6  -6   2 1928.51   74.59
  -6  -7  -2    1.80    4.80
  -6  -7  -2    6.50    4.20
  -6  -7  -2   16.20    8.20
  -6  -7  -2   10.80    5.70
  -6  -7   2   -0.60    2.80
  -6  -7   2   11.80    6.90
  -6  -7   2    8.60    4.60
   6   7   2   10.20    4.20
  -6  -7   2   18.60    5.70
  -6  -7   2    7.40    4.50
   6   7   2   10.20    5.10
   6   7   2    5.20    3.70
  -6  -7   2    3.90    3.30
   6   7   2    6.40    3.80
  -6  -7   2    9.70    4.00
  -6  -7   2    5.40    5.80
  -6  -7   2    9.00    4.60
   6   7   2    7.00    3.70
  -6  -8  -2  189.48   16.60
  -6  -8  -2  194.08   16.90
  -6  -8  -2  221.68   18.90
  -6  -8  -2  199.08   20.50
  -6  -8  -2  176.48   19.00
  -6  -8  -2  196.38   13.00
  -6  -8   2  210.58   14.70
   6   8   2  184.88   13.80
  -6  -8   2  187.58   19.10
   6   8   2  209.38   14.90
  -6  -8   2  186.08   19.20
  -6  -8   2  181.38   14.60
   6   8   2  187.78   12.60
  -6  -8   2  192.58   20.10
   6   8   2  200.68   14.30
  -6  -8   2  194.18   18.10
  -6  -8   2  197.38   13.30
  -6  -8   2  205.48   15.30
  -6  -8   2  186.28   14.90
  -6  -9  -2   29.00    7.30
  -6  -9  -2   41.20   10.50
  -6  -9  -2   37.70   11.50
  -6  -9  -2   36.10   10.10
   6   9   2   50.39    8.00
   6   9   2   34.70    6.50
  -6  -9   2   32.90    8.70
  -6  -9   2   28.90    7.40
  -6  -9   2   22.30    6.60
   6   9   2   36.60    7.30
   6   9   2   35.50    7.70
  -6  -9   2   39.10   10.90
  -6  -9   2   19.10    9.70
  -6 -10  -2  210.48   16.90
  -6 -10  -2  233.98   20.70
  -6 -10  -2  253.47   20.20
  -6 -10   2  192.28   18.90
   6  10   2  227.58   13.60
  -6 -10   2  234.88   15.50
   6  10   2  218.38   15.30
   6  10   2  225.28   14.80
  -6 -10   2  188.28   19.40
  -6 -10   2  181.38   16.60
  -6 -11  -2   30.10    8.70
   6  11   2   14.70    5.10
   6  11   2   11.20    3.80
   6  11   2   16.00    4.20
  -6 -11   2   14.70    6.30
  -6 -11   2   18.40    9.30
  -6 -12  -2  333.77   19.10
  -6 -12  -2  302.07   19.70
   6  12   2  289.37   14.00
   6  12   2  295.97   15.00
  -6 -12   2  289.67   19.30
   6 -11  -3   -0.80    3.40
   6 -11   3   -2.80    3.90
  -6  11   3    3.40    4.10
  -6  11   3    5.70    3.00
  -6  11   3    5.70    3.50
  -6  10  -3   85.49    9.30
   6 -10  -3   75.69   11.10
   6 -10  -3   85.19    8.20
  -6  10  -3   85.49   15.30
   6 -10  -3   80.49   10.80
   6 -10   3   73.79   10.20
  -6  10   3   99.39   13.50
   6 -10   3   92.49   12.90
  -6  10   3   92.59    8.30
  -6  10   3   68.49    9.50
   6  -9  -3    9.00    5.40
   6  -9  -3    0.60    3.40
  -6   9  -3   11.30    5.10
  -6   9  -3    2.20    2.90
   6  -9   3    4.70    4.70
  -6   9   3    0.10    3.70
  -6   9   3    5.90    4.60
   6  -9   3    1.30    4.60
  -6   9   3    0.70    4.10
  -6   9   3    4.30    5.60
  -6   9   3    3.90    3.90
   6  -9   3    2.90    5.20
   6  -8  -3  732.33   34.30
  -6   8  -3  695.03   30.80
  -6   8  -3  703.93   31.70
   6  -8  -3  808.32   35.60
  -6   8   3  645.94   33.20
   6  -8   3  661.93   38.50
   6  -8   3  715.73   35.30
  -6   8   3  732.63   31.10
  -6   8   3  675.53   34.60
  -6   8   3  707.73   33.70
   6  -8   3  661.33   33.40
   6  -8   3  690.53   34.60
  -6   7  -3    6.80    5.50
   6  -7  -3   17.30    6.10
  -6   7  -3   12.60    4.80
   6  -7  -3   19.60    6.40
  -6   7   3   25.00    6.30
   6  -7   3   14.90   10.30
   6  -7   3    6.00    3.80
  -6   7   3   17.20    5.30
  -6   7   3   13.10    5.00
  -6   7   3   21.30    5.60
   6  -7   3   11.40    5.30
   6  -7   3    9.60    6.20
  -6   6  -3  102.59   11.00
  -6   6  -3   96.49   11.60
  -6   6  -3  100.69    9.10
   6  -6  -3   94.09   11.80
   6  -6  -3  106.09   13.10
   6  -6   3  109.89   13.00
   6  -6   3   74.59   12.10
  -6   6   3   93.59   11.00
   6  -6   3  106.39   12.70
   6  -6   3   80.69   12.20
  -6   6   3  121.49   10.80
  -6   6   3   93.89    9.60
  -6   5  -3   11.30    4.00
  -6   5  -3   28.70    5.90
   6  -5  -3   24.10    5.00
   6  -5  -3   11.00    4.90
  -6   5  -3    9.90    4.60
  -6   5   3   20.50    6.00
   6  -5   3    7.10    3.90
   6  -5   3   19.70    6.30
  -6   5   3   14.90    4.30
  -6   5   3   19.30    5.90
  -6   5   3   20.60    5.10
  -6   5   3   10.70    4.00
  -6   4  -3 2964.10  106.39
   6  -4  -3 2997.20  106.29
  -6   4  -3 2933.11  106.99
   6  -4  -3 3056.29  107.79
   6  -4  -3 2995.90  108.89
  -6   4  -3 2988.30  106.69
  -6   4   3 2918.01  107.79
  -6   4   3 2927.81  106.09
  -6   4   3 2990.10  107.59
   6  -4   3 3019.80  110.49
  -6   4   3 3084.49  110.99
   6  -3  -3   59.29    5.60
   6  -3  -3   49.50    6.70
   6  -3  -3   55.99    7.30
  -6   3   3   50.39    8.40
  -6   3   3   57.89    7.30
  -6   3   3   58.49    6.50
   6  -2  -3  387.46   19.00
   6  -2  -3  413.26   18.70
   6  -2  -3  366.56   16.30
   6  -2  -3  393.46   17.10
  -6   2   3  396.96   17.70
   6  -2   3  425.86   19.80
  -6   2   3  363.06   16.60
   6  -1  -3   90.09    7.20
   6  -1  -3   83.69    6.80
   6  -1  -3   92.09    7.30
   6  -1  -3   88.89    6.30
   6  -1   3   81.19    7.60
  -6   1   3   92.09    6.50
   6   0  -3    4.20    2.50
   6   0  -3    0.40    2.20
   6   0  -3   -0.30    2.00
   6   0   3    5.30    2.00
  -6   0   3   -2.40    2.20
   6   1  -3   93.49    6.20
  -6  -1   3   94.79    7.80
   6   2  -3  438.06   18.30
   6   2  -3  383.36   17.50
  -6  -2   3  408.36   19.20
   6   3  -3   60.69    5.30
  -6  -3   3   61.09    7.40
  -6  -3   3   57.69    7.10
  -6  -4   3 3247.48  119.09
  -6  -4   3 3257.87  117.69
  -6  -5   3   18.50    6.20
  -6  -5   3   17.20    6.20
  -6  -5   3   30.00    6.90
  -6  -5   3   12.20    6.30
  -6  -5   3   16.80    4.60
  -6  -5   3   18.10    5.30
  -6  -6   3   83.89   11.00
  -6  -6   3   92.09   14.70
  -6  -6   3   96.49    9.40
  -6  -6   3  115.69   17.20
  -6  -6   3   91.69   11.60
  -6  -6   3  103.79   10.70
  -6  -6   3   96.99   11.30
  -6  -6   3  127.29   18.00
  -6  -6   3  117.19   10.00
   6   6   3   95.39    8.60
  -6  -6   3   83.89   11.30
   6   6   3   86.19    9.20
  -6  -6   3   89.19    9.50
  -6  -6   3   84.29    8.60
   6   6   3  108.09    9.70
  -6  -7   3   14.90    5.80
  -6  -7   3   24.00    9.50
   6   7   3   21.30    5.30
   6   7   3   18.80    5.80
   6   7   3   16.50    4.80
  -6  -7   3   14.60    5.00
  -6  -7   3   21.10    6.10
  -6  -7   3   18.50    5.00
  -6  -7   3   12.20    6.30
  -6  -7   3    9.90    5.60
  -6  -7   3   19.30    6.20
   6   7   3    7.10    3.50
  -6  -7   3    9.60    4.10
  -6  -7   3   20.40    8.50
  -6  -7   3   16.30    5.40
  -6  -8  -3  634.34   36.30
  -6  -8  -3  688.83   39.50
  -6  -8  -3  717.23   36.80
  -6  -8  -3  675.73   31.70
   6   8   3  698.93   32.60
  -6  -8   3  716.93   33.40
  -6  -8   3  742.83   40.00
  -6  -8   3  665.73   33.10
   6   8   3  652.33   32.30
  -6  -8   3  777.92   41.70
  -6  -8   3  696.33   32.80
  -6  -8   3  697.23   37.50
   6   8   3  692.23   33.00
   6   8   3  684.93   33.40
  -6  -8   3  692.13   39.90
  -6  -8   3  674.33   33.00
  -6  -8   3  695.03   33.70
  -6  -9  -3    3.80    4.70
  -6  -9  -3    5.10    8.60
  -6  -9  -3    3.60    5.60
   6   9   3    0.40    3.40
  -6  -9   3    6.20    4.10
   6   9   3    7.20    3.90
  -6  -9   3    7.60    4.80
  -6  -9   3    3.50    4.30
   6   9   3    5.50    3.70
  -6  -9   3   -0.40    6.10
  -6  -9   3    9.50    4.30
   6   9   3    1.30    4.10
  -6  -9   3   10.50    7.60
  -6 -10  -3   98.19   14.50
  -6 -10  -3   61.39   12.70
  -6 -10  -3   73.89   10.90
   6  10   3   83.29   11.40
   6  10   3   61.39    8.60
   6  10   3   96.09    8.80
  -6 -10   3   56.59   12.20
  -6 -10   3   73.89   11.40
  -6 -10   3   71.69   14.10
  -6 -11  -3    3.00    5.60
  -6 -11  -3    3.60    6.40
  -6 -11   3    1.20    5.50
   6  11   3    2.80    2.60
   6  11   3    7.80    3.60
  -6 -11   3    6.50    4.70
   6  11   3    8.40    4.20
   6 -11  -4   33.20    6.70
  -6  11   4   45.80    8.00
  -6  11   4   40.10    7.30
  -6  11   4   37.60    6.00
   6 -11   4   25.50    6.60
   6 -10  -4  106.79    9.50
   6 -10  -4  118.99   11.90
  -6  10   4  105.19    9.30
   6 -10   4  117.59   11.30
  -6  10   4  125.89   10.70
   6 -10   4  120.69   14.40
   6  -9  -4    3.20    3.60
   6  -9   4    7.70    5.80
   6  -9   4   10.50    5.60
  -6   9   4    7.10    6.40
  -6   9   4    7.70    5.20
  -6   9   4    4.10    4.00
   6  -9   4    5.50    4.90
  -6   9   4    5.00    4.00
   6  -8  -4   39.90    8.80
  -6   8  -4   49.50    7.50
   6  -8  -4   43.80    9.00
   6  -8   4   36.20    8.40
  -6   8   4   24.40    6.50
   6  -8   4   41.80    9.20
   6  -8   4   21.10    7.30
  -6   8   4   47.40    7.80
  -6   8   4   35.60    7.80
   6  -8   4   45.90    9.30
  -6   8   4   52.79    9.50
   6  -7  -4   64.99   11.00
   6  -7  -4   71.29   10.40
   6  -7   4  124.69   14.50
  -6   7   4   68.19   10.90
  -6   7   4   87.39   10.10
   6  -7   4   91.59   12.00
  -6   7   4   80.39   12.00
   6  -7   4   98.99   12.90
  -6   7   4   65.29   10.30
  -6   7   4   73.89   10.80
   6  -7   4   85.99   14.00
   6  -6  -4  988.80   42.50
  -6   6  -4  974.80   40.40
   6  -6  -4  971.80   44.70
  -6   6  -4  960.20   39.90
  -6   6   4  964.90   41.80
  -6   6   4  974.40   39.60
  -6   6   4  922.81   46.20
   6  -6   4  959.60   42.80
   6  -6   4 1016.50   44.50
  -6   6   4 1022.60   44.00
  -6   6   4 1028.20   43.10
   6  -6   4 1030.00   47.00
   6  -6   4 1025.90   44.20
   6  -6   4  940.31   42.60
  -6   5  -4   67.39    8.70
  -6   5  -4   59.39    7.60
   6  -5  -4   52.29    7.10
   6  -5  -4   52.09    8.20
   6  -5   4   55.89    9.00
   6  -5   4   47.50    9.30
   6  -5   4   52.59    9.80
  -6   5   4   57.09    8.30
  -6   5   4   55.69    9.10
  -6   5   4   69.79   10.80
   6  -5   4   61.99    9.70
   6  -5   4   58.99    9.20
  -6   5   4   63.19    9.00
  -6   5   4   62.59    8.90
  -6   5   4   54.79    7.20
  -6   4  -4 1248.48   47.30
   6  -4  -4 1216.88   47.60
   6  -4  -4 1226.08   47.00
   6  -4  -4 1203.48   49.50
  -6   4  -4 1171.98   46.40
  -6   4  -4 1205.48   48.60
   6  -4  -4 1273.27   49.20
   6  -4   4 1332.57   51.79
  -6   4   4 1248.78   49.40
  -6   4   4 1077.19   47.80
  -6   4   4 1205.28   48.30
  -6   4   4 1192.68   51.59
  -6   4   4 1190.28   46.00
   6  -3  -4   93.49    8.30
   6  -3  -4  124.99    9.90
   6  -3  -4  105.09    9.20
  -6   3   4  114.29    8.60
   6  -3   4  136.59   10.70
  -6   3   4  111.79    9.40
  -6   3   4  111.19    7.50
   6  -2  -4  386.96   19.10
   6  -2  -4  361.16   17.20
  -6   2  -4  391.86   20.40
   6  -2  -4  391.46   19.40
  -6   2   4  350.06   18.20
   6  -2   4  387.86   19.80
  -6   2   4  384.36   17.50
   6  -1  -4   67.39    6.20
   6  -1  -4   75.49    8.70
   6  -1  -4   66.09    6.90
   6  -1  -4   74.99    6.70
  -6   1   4   67.19    5.80
  -6   1   4   62.79    6.10
   6   0  -4  965.00   38.50
   6   0  -4 1026.60   37.80
   6   0  -4  997.60   37.10
   6   0  -4  918.81   34.90
   6   0  -4  808.82   37.40
   6   1  -4   82.09    6.80
  -6  -1   4   72.19    7.10
   6   2  -4  434.86   18.50
  -6  -2   4  374.16   18.90
  -6  -2   4  376.06   19.10
   6   3  -4  135.09    8.60
  -6  -3   4  124.69   10.60
  -6  -4   4 1328.97   61.29
  -6  -4   4 1340.97   53.69
  -6  -4   4 1465.95   63.59
  -6  -4   4 1381.26   58.69
  -6  -4   4 1356.66   53.49
  -6  -5   4   43.30    8.80
  -6  -5   4   71.09    9.50
  -6  -5   4   66.89   12.50
  -6  -5   4   68.69   12.00
  -6  -5   4   58.79   12.90
  -6  -5   4   73.29    9.80
  -6  -5   4   65.89    9.00
  -6  -5   4   66.29    9.30
  -6  -5   4   60.39    8.40
  -6  -5   4   60.19    8.70
  -6  -6   4 1037.50   44.30
  -6  -6   4 1170.08   54.59
  -6  -6   4 1067.29   46.90
  -6  -6   4 1071.39   45.60
  -6  -6   4 1074.39   45.30
  -6  -6   4 1067.29   46.00
  -6  -6   4 1082.19   47.40
  -6  -6   4 1174.88   49.80
  -6  -6   4 1106.69   45.80
  -6  -6   4 1067.49   46.90
  -6  -6   4 1164.38   55.79
  -6  -6   4 1071.19   52.59
  -6  -7   4   80.39   11.00
  -6  -7   4   81.89   14.00
  -6  -7   4   79.69   10.10
  -6  -7   4   67.49   10.70
  -6  -7   4   75.19   14.00
  -6  -7   4   74.69   10.80
  -6  -7   4   90.39   11.50
  -6  -7   4   43.30   11.10
  -6  -7   4   76.39   10.40
   6   7   4  104.69    9.90
  -6  -7   4   93.59   12.60
  -6  -7   4   70.39   14.60
  -6  -7   4   96.89    9.10
  -6  -8  -4   40.20    8.00
  -6  -8  -4   37.00    9.20
  -6  -8   4   37.70    8.00
  -6  -8   4   39.10    7.40
  -6  -8   4   45.60    8.60
   6   8   4   36.50    7.10
  -6  -8   4   26.90    8.70
   6   8   4   30.00    7.40
   6   8   4   45.10    7.80
  -6  -8   4   40.80    7.90
  -6  -8   4   51.79   10.70
  -6  -8   4   25.50    9.40
   6   8   4   40.10    7.90
  -6  -8   4   46.40    8.80
  -6  -8   4   38.60   12.00
  -6  -9  -4    9.20    6.20
  -6  -9  -4    1.70    6.60
  -6  -9  -4   -1.60    3.40
  -6  -9   4    7.80    7.00
  -6  -9   4    2.30    3.40
  -6  -9   4    8.30    4.70
  -6  -9   4    5.30    6.10
  -6  -9   4    0.20    3.10
   6   9   4    3.70    3.30
  -6  -9   4    4.40    3.40
  -6  -9   4    6.40    4.50
   6   9   4   11.20    4.90
  -6 -10  -4   95.99   11.40
  -6 -10  -4   97.99   15.30
  -6 -10  -4  109.89   14.80
  -6 -10   4   99.09   11.00
   6  10   4  126.79   11.40
  -6 -10   4  100.79   14.90
   6  10   4  100.79   10.60
  -6 -10   4  121.39   15.80
   6  10   4  112.99    9.50
  -6 -11  -4   31.50    8.80
  -6 -11  -4   38.30    7.90
   6  11   4   29.30    5.20
   6  11   4   51.59    9.20
  -6 -11   4   22.80    6.50
   6  11   4   41.80    7.10
  -6 -11   4   38.30    8.60
   6 -11  -5    8.60    4.10
  -6  11   5    6.10    3.10
  -6  11   5   15.40    4.70
   6 -11   5    5.40    3.90
   6 -10  -5  344.47   18.40
  -6  10   5  336.57   18.60
  -6  10   5  354.56   17.60
   6 -10   5  347.67   20.20
   6  -9  -5    6.20    4.70
  -6   9   5    7.40    4.10
   6  -9   5    9.90    5.10
  -6   9   5    4.80    4.90
   6  -9   5    2.50    5.00
  -6   9   5    2.40    4.00
   6  -9   5    4.40    5.20
   6  -8  -5  104.99   13.90
  -6   8  -5   99.99   13.20
   6  -8   5   91.29   12.40
  -6   8   5  126.69   14.90
  -6   8   5  151.88   13.40
  -6   8   5  125.99   10.00
   6  -8   5  114.59   14.70
  -6   8   5  118.59   11.30
   6  -8   5   99.29   16.10
   6  -8   5   83.99   12.40
  -6   7  -5   89.49   10.40
   6  -7  -5   72.49   12.00
   6  -7  -5   53.79   14.70
  -6   7   5   76.09   10.70
  -6   7   5   90.89   10.30
   6  -7   5   71.59   10.90
   6  -7   5   89.19   13.00
   6  -7   5   63.09   10.90
   6  -7   5   82.89   12.30
   6  -7   5   77.59   13.30
  -6   7   5   88.19   11.80
  -6   7   5   57.59   10.20
  -6   6  -5  462.85   23.20
  -6   6  -5  450.45   22.60
   6  -6  -5  481.45   26.00
   6  -6  -5  486.05   28.10
   6  -6   5  476.25   26.30
  -6   6   5  478.25   22.30
   6  -6   5  448.46   28.00
  -6   6   5  538.55   30.50
  -6   6   5  442.06   26.00
   6  -6   5  481.55   25.90
  -6   6   5  479.65   26.60
  -6   6   5  467.45   24.70
   6  -5  -5    2.40    3.70
  -6   5  -5    1.60    3.40
   6  -5  -5   -2.30    2.40
  -6   5  -5    4.10    3.30
  -6   5  -5   -0.90    3.80
   6  -5  -5    0.00    3.20
   6  -5  -5    1.10    3.80
   6  -5   5   10.80    4.80
   6  -5   5    2.50    4.30
   6  -5   5    2.20    3.80
  -6   5   5    6.80    3.80
  -6   5   5    7.40    3.20
   6  -5   5   -0.80    2.30
  -6   5   5    5.50    4.40
  -6   5   5    0.40    3.60
   6  -5   5    6.20    4.80
  -6   5   5    2.50    3.20
   6  -4  -5  229.58   15.00
   6  -4  -5  219.18   14.00
   6  -4  -5  205.58   17.10
   6  -4  -5  251.47   15.50
   6  -4  -5  244.08   16.10
   6  -4  -5  228.18   15.30
   6  -4  -5  251.77   16.40
  -6   4  -5  257.37   14.10
  -6   4  -5  292.37   17.10
   6  -4   5  254.77   17.40
  -6   4   5  262.77   15.80
   6  -4   5  267.67   17.20
   6  -4   5  262.27   15.40
  -6   4   5  246.48   16.30
  -6   4   5  245.58   15.20
  -6   4   5  242.98   13.20
  -6   4   5  274.07   15.20
   6  -4   5  264.67   16.60
   6  -3  -5   38.90    6.50
   6  -3  -5   64.79    8.10
   6  -3  -5   44.80    7.60
   6  -3  -5   51.69    8.10
   6  -3  -5   47.70    7.70
   6  -3  -5   59.99    7.30
  -6   3   5   43.40    6.90
  -6   3   5   36.10    7.20
   6  -3   5   59.19    8.80
  -6   3   5   45.10    6.80
   6  -2  -5 3206.78  115.09
  -6   2  -5 3272.57  116.49
   6  -2  -5 3019.40  111.79
   6  -2  -5 3250.17  115.19
  -6   2   5 3126.19  111.69
   6  -2   5 3128.69  115.49
  -6   2   5 3024.40  115.09
   6  -1  -5    4.90    3.50
   6  -1  -5   10.10    3.60
   6  -1  -5    9.20    4.10
   6  -1  -5   10.10    4.00
   6   0  -5    0.80    2.60
   6   0  -5   -1.20    2.40
   6   0  -5    0.00    2.90
   6   0  -5   -1.20    2.30
  -6   0   5    2.00    3.00
   6   1  -5    9.00    3.60
   6   1  -5    7.20    3.10
   6   1  -5   14.30    4.60
   6   1  -5    8.10    3.60
  -6  -1   5    8.30    3.80
  -6  -1   5   13.70    4.20
   6   2  -5 3417.16  119.59
   6   2  -5 3127.49  118.49
   6   2  -5 3488.35  122.09
  -6  -2   5 3333.77  120.39
  -6  -2   5 3371.76  122.99
   6   3  -5   52.09    6.70
  -6  -3   5   43.00    8.20
  -6  -3   5   42.20    9.50
  -6  -3   5   37.40    7.00
  -6  -3   5   34.20    8.60
  -6  -3   5   52.29    8.50
  -6  -3   5   51.39   11.90
  -6  -3   5   55.19   10.00
  -6  -3   5   49.30    7.50
  -6  -4   5  268.37   18.60
  -6  -4   5  286.17   22.10
  -6  -4   5  256.27   15.70
  -6  -4   5  307.67   18.80
  -6  -4   5  293.97   17.70
  -6  -4   5  240.28   15.30
  -6  -4   5  257.97   21.00
  -6  -5   5    4.50    3.70
  -6  -5   5    7.00    4.30
  -6  -5   5    1.40    3.10
  -6  -5   5    2.90    3.80
  -6  -5   5    0.60    3.80
  -6  -5   5    6.00    3.70
  -6  -5   5    2.00    5.30
  -6  -5   5    6.10    6.40
  -6  -5   5    3.60    2.90
  -6  -5   5    4.30    3.40
  -6  -5   5   -1.70    2.60
  -6  -5   5    6.00    5.50
  -6  -6   5  487.85   25.30
  -6  -6   5  486.65   35.90
  -6  -6   5  573.94   45.50
  -6  -6   5  538.75   29.50
  -6  -6   5  477.95   25.70
  -6  -6   5  545.45   27.70
  -6  -6   5  526.65   27.20
  -6  -6   5  520.35   27.40
  -6  -6   5  493.35   24.70
  -6  -6   5  516.95   25.80
  -6  -7   5   90.99   12.10
  -6  -7   5   70.39   10.70
  -6  -7   5   67.99   13.80
  -6  -7   5   80.09   10.10
  -6  -7   5   77.49   14.70
  -6  -7   5   88.19   12.30
  -6  -7   5   87.49   15.20
  -6  -7   5   82.89   10.90
  -6  -7   5  101.39    9.80
  -6  -7   5   86.59   11.90
  -6  -7   5   90.29   11.30
  -6  -7   5   83.19   11.20
  -6  -7   5   74.09   10.80
   6   8  -5   91.59   12.90
  -6  -8   5  113.69   11.50
  -6  -8   5  125.39   11.00
  -6  -8   5  128.59   12.00
  -6  -8   5  105.59   17.10
  -6  -8   5   90.89   15.00
  -6  -8   5  111.79   11.70
   6   8   5  118.59   10.80
  -6  -8   5   97.29    9.30
  -6  -8   5  124.29   18.10
  -6  -8   5  113.49   11.30
   6   8   5   71.49   16.30
  -6  -9  -5    0.30    3.50
  -6  -9  -5    1.00    6.50
  -6  -9   5    4.60    6.60
  -6  -9   5    8.60    4.80
  -6  -9   5    1.80    5.60
  -6  -9   5    3.30    4.00
  -6  -9   5    6.40    4.00
  -6  -9   5   -2.60    2.80
   6   9   5    3.00    3.70
  -6  -9   5    3.50    2.70
  -6 -10  -5  343.77   23.50
  -6 -10  -5  266.77   18.70
  -6 -10  -5  296.47   23.60
   6  10   5  337.57   17.90
  -6 -10   5  372.46   22.80
  -6 -10   5  347.97   21.40
  -6 -10   5  306.67   18.90
  -6 -11  -5   -2.10    4.50
  -6 -11  -5    8.30    4.50
   6  11   5    5.10    2.60
   6 -10  -6  123.29    9.90
   6 -10  -6  146.29   11.80
   6 -10   6  117.29   10.90
  -6  10   6  133.09    9.60
  -6  10   6  132.59    9.80
   6 -10   6  127.79   11.30
   6  -9  -6    6.00    4.10
   6  -9   6   11.50    6.00
  -6   9   6   14.10    5.20
  -6   9   6   13.50    6.00
   6  -9   6   19.00    6.10
   6  -9   6   13.30    6.20
   6  -8  -6    7.80    5.20
  -6   8   6    8.70    4.30
  -6   8   6   14.10    5.00
   6  -8   6    4.00    5.20
   6  -8   6    9.20    6.00
   6  -8   6   10.70    4.90
  -6   7  -6   19.10    5.80
   6  -7  -6   23.40    8.20
   6  -7  -6   15.00    6.30
  -6   7   6   12.30    6.80
   6  -7   6    3.50    5.50
   6  -7   6   13.20    5.60
  -6   7   6   17.40    5.60
   6  -7   6    4.70    5.70
   6  -7   6   17.60    5.50
  -6   7   6   13.00    4.80
  -6   7   6   10.30    4.30
  -6   7   6   22.20    7.20
   6  -7   6   16.20    6.80
   6  -6  -6  192.08   17.30
   6  -6  -6  220.38   17.20
  -6   6  -6  238.28   14.70
  -6   6  -6  254.47   15.60
   6  -6  -6  228.58   13.50
   6  -6   6  253.17   17.70
   6  -6   6  205.68   16.00
   6  -6   6  226.58   16.80
  -6   6   6  211.38   15.50
  -6   6   6  217.48   15.40
  -6   6   6  253.07   16.60
  -6   6   6  230.18   13.50
   6  -6   6  220.38   18.70
  -6   6   6  176.48   19.20
   6  -6   6  266.67   17.20
   6  -5  -6    6.70    4.30
   6  -5  -6    2.20    4.20
  -6   5  -6    7.70    4.10
   6  -5  -6    7.40    4.30
  -6   5  -6    6.50    4.60
   6  -5  -6    0.00    2.70
   6  -5   6    7.30    3.90
   6  -5   6   11.60    4.80
  -6   5   6    7.50    4.20
  -6   5   6    2.90    3.70
  -6   5   6    7.30    4.60
  -6   5   6   -1.10    3.20
   6  -5   6   15.70   10.10
   6  -5   6    4.80    4.80
  -6   5   6   11.60    4.80
   6  -5   6    7.60    5.20
   6  -4  -6  556.34   26.30
   6  -4  -6  541.75   28.60
  -6   4  -6  549.95   25.00
  -6   4  -6  550.44   28.70
  -6   4  -6  564.34   25.80
   6  -4  -6  526.15   25.80
   6  -4  -6  545.15   28.40
   6  -4  -6  509.35   30.50
   6  -4  -6  615.24   27.70
   6  -4  -6  520.25   24.40
  -6   4   6  563.44   26.80
  -6   4   6  538.75   25.30
   6  -4   6  557.54   29.60
  -6   4   6  535.85   28.10
   6  -4   6  550.84   28.30
   6  -4   6  522.45   27.10
   6  -4   6  559.74   26.70
   6  -4   6  571.64   29.00
   6  -3  -6   15.30    5.10
   6  -3  -6   28.90    7.00
   6  -3  -6   19.50    5.90
  -6   3  -6   23.20    6.50
  -6   3  -6   33.00    6.40
   6  -3  -6   12.00    4.70
   6  -3  -6   16.20    4.40
   6  -3  -6   23.60    6.20
  -6   3   6    9.70    3.40
   6  -3   6   18.80    5.70
   6  -3   6   32.70    7.40
  -6   3   6   22.50    5.10
  -6   3   6   21.80    6.30
   6  -3   6   27.90    7.00
   6  -2  -6  213.48   15.90
   6  -2  -6  251.77   13.90
   6  -2  -6  233.18   16.20
   6  -2  -6  238.98   14.50
   6  -2   6  268.37   16.70
  -6   2   6  245.68   16.40
   6  -1  -6   77.49   12.10
   6  -1  -6   83.39    7.60
   6  -1  -6  104.29    9.00
   6  -1  -6  104.69    9.70
   6  -1  -6   84.59   11.10
   6   0  -6 1862.81   68.09
   6   0  -6 1934.51   69.89
   6   0  -6 1890.51   72.19
  -6   0   6 1743.83   76.29
  -6   0   6 1763.72   70.69
   6   1  -6   82.89   10.80
   6   1  -6   84.79    8.60
   6   1  -6   98.19    7.70
   6   1  -6   96.19    8.40
  -6  -1   6   98.29   14.30
  -6  -1   6   89.79   12.10
  -6  -1   6   86.29    8.70
  -6  -1   6  105.09    9.90
  -6  -1   6   96.89   13.10
  -6  -1   6   82.89   13.60
  -6  -1   6   90.79   11.60
  -6  -1   6   86.79    8.50
   6   2  -6  284.97   15.50
   6   2  -6  256.47   14.60
   6   2  -6  233.68   13.10
   6   2  -6  278.47   17.10
  -6  -2   6  257.57   15.60
  -6  -2   6  268.47   17.40
   6   3  -6   18.80    5.80
   6   3  -6   18.60    4.90
  -6  -3   6   20.00    5.90
  -6  -3   6   21.20    6.20
  -6  -3   6   24.00    6.20
  -6  -3   6   28.80    8.60
  -6  -3   6   26.80    8.80
  -6  -3   6   34.20    7.80
  -6  -3   6   18.90    6.40
  -6  -3   6   19.30    5.60
  -6  -3   6   25.70    8.00
   6   4  -6  603.04   30.50
  -6  -4   6  600.94   29.60
  -6  -4   6  665.33   33.30
  -6  -4   6  625.44   28.90
  -6  -4   6  577.74   34.60
  -6  -4   6  607.04   29.00
  -6  -4   6  625.14   36.60
  -6  -4   6  659.33   31.30
  -6  -4   6  651.03   32.30
  -6  -4   6  628.74   37.70
  -6  -4   6  626.84   30.20
   6   5  -6    7.40    4.40
  -6  -5   6    8.80    5.80
  -6  -5   6    7.00    4.40
  -6  -5   6    3.30    5.20
  -6  -5   6    2.40    3.70
  -6  -5   6    7.20    7.50
  -6  -5   6    2.90    5.20
  -6  -5   6    6.70    3.70
  -6  -5   6    6.40    6.10
  -6  -5   6    3.20    3.70
  -6  -5   6    4.60    4.20
  -6  -5   6    8.90    4.50
  -6  -5   6    9.90    4.30
   6   6  -6  244.78   17.10
  -6  -6   6  233.48   21.90
  -6  -6   6  255.97   22.70
  -6  -6   6  249.68   16.70
  -6  -6   6  237.38   16.40
  -6  -6   6  265.27   22.40
  -6  -6   6  284.97   19.90
  -6  -6   6  243.78   15.80
  -6  -6   6  262.57   18.30
  -6  -6   6  255.47   16.10
  -6  -6   6  248.78   15.90
  -6  -6   6  241.58   19.70
  -6  -6   6  279.67   18.00
  -6  -6   6  275.37   18.20
   6   7  -6   14.70    5.60
  -6  -7   6   14.00    4.60
  -6  -7   6   18.60    5.30
  -6  -7   6   18.30    5.60
  -6  -7   6   14.10    7.10
  -6  -7   6   25.80    9.30
  -6  -7   6    9.40    5.20
  -6  -7   6   20.90    6.80
  -6  -7   6   10.90    6.60
  -6  -7   6    4.30    2.90
  -6  -7   6   10.90    4.80
  -6  -7   6   14.80    5.60
  -6  -7   6   12.50    6.00
  -6  -7   6   23.10    8.00
  -6  -8   6   10.60    6.20
  -6  -8   6    8.50    6.30
  -6  -8   6   12.50    5.50
  -6  -8   6    9.60    4.20
  -6  -8   6   13.60    4.20
  -6  -8   6    5.60    4.60
  -6  -8   6    1.20    2.70
  -6  -8   6   16.70    5.50
  -6  -8   6   16.20    8.10
  -6  -8   6    1.80    2.90
  -6  -9   6    4.50    5.80
  -6  -9   6   13.50    4.80
  -6  -9   6   14.60    6.00
  -6  -9   6    9.00    4.30
  -6  -9   6   17.70    8.10
  -6  -9   6    8.20    4.70
   6   9   6   13.90    4.80
   6  10   6  135.29    9.70
  -6 -10   6  128.89   11.60
  -6 -10   6  111.09    9.70
   6 -10  -7   24.10    4.70
   6 -10  -7   29.40    6.10
   6 -10   7   37.50    6.50
   6 -10   7   40.70    6.70
  -6  10   7   23.50    4.10
   6  -9  -7   30.10    6.80
  -6   9   7   24.10    5.20
   6  -9   7   35.40    7.20
   6  -9   7   27.80    7.70
   6  -8  -7  579.44   31.30
   6  -8   7  591.34   29.10
  -6   8   7  602.44   28.00
   6  -8   7  576.04   29.60
   6  -8   7  580.34   30.00
  -6   8   7  609.54   27.00
   6  -7  -7   11.80    6.00
  -6   7  -7   19.20    5.60
  -6   7   7   22.70    6.10
  -6   7   7   10.00    4.10
  -6   7   7   19.60    6.40
   6  -7   7   20.80    6.00
   6  -7   7   14.20    6.90
   6  -7   7   13.30    6.30
   6  -7   7   22.80    7.00
  -6   6  -7  861.11   38.40
   6  -6  -7  896.31   37.30
   6  -6  -7  876.71   44.50
   6  -6  -7  860.41   43.70
  -6   6   7  919.21   41.50
   6  -6   7  885.91   45.20
  -6   6   7  945.61   39.80
  -6   6   7  917.31   38.30
   6  -6   7  961.20   42.20
  -6   6   7  957.60   46.00
   6  -6   7  905.51   40.60
   6  -6   7  910.41   42.20
  -6   6   7  859.11   39.40
   6  -6   7  909.31   41.30
   6  -5  -7   46.80    8.30
  -6   5  -7   34.90    6.80
   6  -5  -7   45.40   10.00
   6  -5  -7   46.60    9.10
  -6   5  -7   38.20    8.90
  -6   5  -7   43.00    8.10
   6  -5  -7   33.50    7.00
  -6   5   7   46.50    7.60
   6  -5   7   25.10    6.50
   6  -5   7   34.80    8.10
  -6   5   7   39.30    8.00
   6  -5   7   40.90    9.70
   6  -5   7   39.40    8.60
  -6   5   7   33.60    8.30
   6  -5   7   38.80    8.10
   6  -5   7   37.10    8.80
  -6   4  -7 1543.55   60.89
   6  -4  -7 1520.85   64.59
   6  -4  -7 1528.35   67.69
  -6   4  -7 1560.94   59.99
  -6   4  -7 1589.34   65.69
   6  -4  -7 1573.44   62.49
  -6   4  -7 1450.95   62.39
   6  -4  -7 1600.14   65.29
   6  -4   7 1593.74   61.89
  -6   4   7 1482.65   60.19
   6  -4   7 1554.54   65.99
   6  -4   7 1622.04   69.89
   6  -4   7 1616.34   64.09
   6  -4   7 1542.75   62.59
  -6   4   7 1570.84   64.49
   6  -4   7 1538.15   63.49
   6  -3  -7    6.80    4.40
   6  -3  -7    5.60    4.30
   6  -3  -7    9.50    5.00
   6  -3  -7    1.10    4.00
  -6   3  -7    5.90    5.20
   6  -3  -7    7.60    4.40
   6  -3   7    4.30    4.60
  -6   3   7   -1.30    3.60
  -6   3   7    8.40    3.20
  -6   3   7    9.60    4.10
   6  -3   7    9.80    4.10
   6  -3   7    9.40    4.10
   6  -3   7    4.60    4.70
   6  -3   7   12.00    5.50
   6  -2  -7  574.54   28.10
   6  -2  -7  541.45   26.70
   6  -2  -7  543.45   25.70
   6  -2  -7  577.84   29.60
   6  -2  -7  555.54   31.00
   6  -2  -7  576.14   29.60
   6  -2   7  551.54   29.00
  -6   2   7  557.84   29.50
   6  -2   7  582.74   29.30
  -6   2   7  531.75   26.90
   6  -1  -7   33.50    7.20
   6  -1  -7   24.80    6.50
   6  -1  -7   25.80    5.80
   6  -1  -7   23.40    8.30
   6  -1  -7   10.50    5.20
   6  -1  -7   26.50    6.20
   6  -1   7   21.70    6.80
  -6   1   7   19.10    7.20
  -6   1   7   37.30    7.50
   6   0  -7    5.90    3.30
   6   0  -7    5.60    3.20
   6   0  -7    4.90    3.40
   6   0  -7   10.80    4.80
   6   0  -7   -0.10    3.70
  -6   0   7    3.50    4.30
  -6   0   7    5.20    4.10
  -6   0   7    0.90    3.40
  -6   0   7    2.70    2.90
  -6   0   7    1.40    3.70
   6   1  -7   20.80    6.60
   6   1  -7   18.10    5.50
   6   1  -7   16.30    5.40
   6   1  -7   25.10    5.70
  -6  -1   7   24.50    9.20
  -6  -1   7   33.00    7.60
  -6  -1   7   17.20    5.10
  -6  -1   7   23.10    5.90
  -6  -1   7   20.90    6.00
  -6  -1   7   25.60    6.10
  -6  -1   7   21.20    7.30
  -6  -1   7   26.10    7.90
   6   2  -7  572.14   30.10
   6   2  -7  600.14   26.20
   6   2  -7  577.34   28.10
  -6  -2   7  610.94   29.60
  -6  -2   7  631.84   36.50
  -6  -2   7  613.94   31.40
  -6  -2   7  628.34   28.70
  -6  -2   7  499.85   27.80
  -6  -2   7  658.03   31.80
  -6  -2   7  596.54   31.20
  -6  -2   7  600.44   35.00
   6   3  -7    5.40    3.40
   6   3  -7    7.40    5.20
  -6  -3   7   14.80    6.60
  -6  -3   7    3.40    4.60
  -6  -3   7    1.50    5.60
  -6  -3   7    0.60    3.30
  -6  -3   7    4.90    4.60
  -6  -3   7    5.00    3.40
  -6  -3   7    4.30    4.90
  -6  -3   7    3.50    3.80
  -6  -3   7    6.80    4.70
   6   4  -7 1770.62   72.09
  -6  -4   7 1752.62   74.19
  -6  -4   7 1694.23   70.09
  -6  -4   7 1741.53   69.09
  -6  -4   7 1870.41   79.29
  -6  -4   7 1864.11   73.09
  -6  -4   7 1764.32   68.99
  -6  -4   7 1740.33   78.69
  -6  -4   7 1751.42   71.19
  -6  -4   7 1889.91   81.29
   6   5  -7   38.10    8.30
  -6  -5   7   37.10    8.10
  -6  -5   7   42.60    7.80
  -6  -5   7   20.90    8.20
  -6  -5   7   36.20    8.80
  -6  -5   7   47.00    8.40
  -6  -5   7   42.00   11.00
  -6  -5   7   45.20    7.70
  -6  -5   7   64.59   10.70
  -6  -5   7   43.30   11.90
  -6  -5   7   37.50    7.30
  -6  -5   7   31.10    7.80
   6   6  -7 1017.20   45.40
  -6  -6   7 1002.90   49.50
  -6  -6   7  975.80   42.40
  -6  -6   7 1074.29   45.90
  -6  -6   7 1105.29   45.20
  -6  -6   7  973.80   47.60
  -6  -6   7 1027.00   47.40
  -6  -6   7  958.50   42.10
  -6  -6   7  970.30   41.80
  -6  -6   7  975.40   45.30
  -6  -6   7  987.30   52.39
  -6  -6   7 1000.10   51.39
  -6  -6   7  957.30   43.20
  -6  -7   7   17.50    4.80
  -6  -7   7   14.70    6.20
  -6  -7   7   11.50    5.00
  -6  -7   7   20.60    6.40
  -6  -7   7   10.80    7.20
  -6  -7   7   22.30    8.90
  -6  -7   7   19.40    6.20
  -6  -7   7   18.70    6.10
  -6  -7   7   14.10    6.80
  -6  -7   7   19.80    5.40
  -6  -7   7   14.10    5.20
  -6  -7   7   14.80    6.90
  -6  -8   7  662.23   31.40
  -6  -8   7  622.94   30.40
  -6  -8   7  652.53   35.40
  -6  -8   7  597.04   34.80
  -6  -8   7  627.64   30.50
  -6  -8   7  611.54   30.60
  -6  -8   7  611.64   27.50
  -6  -9   7   27.00    6.70
  -6  -9   7   30.80    7.90
  -6  -9   7   29.30    5.60
  -6  -9   7   32.60    6.00
   6  10   7   29.40    4.70
   6  -9  -8   77.69    9.50
  -6   9   8  111.79    7.10
   6  -9   8   78.39    8.20
   6  -9   8   96.79    9.50
   6  -9   8  110.29    9.10
   6  -8  -8   -2.40    3.60
   6  -8   8    3.20    4.40
  -6   8   8    5.30    2.90
   6  -8   8   -3.70    3.70
  -6   7  -8    5.50    4.90
   6  -7  -8    4.50    4.70
   6  -7   8    2.90    5.20
   6  -7   8    4.70    4.60
  -6   7   8    8.70    4.70
   6  -7   8    4.70    5.10
  -6   7   8    0.40    2.50
   6  -7   8    5.80    3.70
  -6   6  -8 1024.60   41.40
  -6   6  -8  910.71   41.10
  -6   6  -8  945.71   43.80
   6  -6  -8 1009.60   47.80
   6  -6   8  988.40   43.10
   6  -6   8  996.60   43.10
   6  -6   8  994.00   44.70
  -6   6   8  989.10   40.60
   6  -6   8  978.40   44.20
  -6   6   8 1018.80   44.20
  -6   5  -8   10.40    6.00
   6  -5  -8   16.00    7.00
   6  -5  -8   18.80    5.20
  -6   5  -8   18.40    6.50
  -6   5  -8   19.00    5.10
   6  -5  -8   18.20    6.80
  -6   5  -8    8.20    5.50
   6  -5  -8   12.70    5.80
   6  -5   8   10.80    5.60
  -6   5   8   12.80    4.00
   6  -5   8   15.40    6.30
  -6   5   8   22.40    7.30
   6  -5   8   21.50    5.70
   6  -5   8   14.10    6.00
   6  -5   8   14.00    6.10
  -6   4  -8   45.00   10.50
   6  -4  -8   29.50    8.20
  -6   4  -8   53.79   10.00
   6  -4  -8   51.59   10.70
   6  -4  -8   47.60    8.90
   6  -4  -8   38.20   10.00
  -6   4  -8   43.90    8.30
  -6   4  -8   44.50    7.70
   6  -4  -8   36.20    7.40
  -6   4  -8   52.29    8.90
   6  -4   8   46.60    8.70
  -6   4   8   45.80    6.30
   6  -4   8   43.50    8.10
   6  -4   8   39.70    8.60
   6  -4   8   47.60   10.40
  -6   4   8   46.80    9.70
   6  -4   8   48.60    8.20
   6  -4   8   38.70    8.60
   6  -3  -8    8.80    4.40
  -6   3  -8   11.30    6.00
   6  -3  -8   12.10    5.60
   6  -3  -8    5.10    3.80
   6  -3  -8    9.90    5.10
  -6   3  -8    9.40    4.20
   6  -3  -8    1.70    4.40
   6  -3  -8   13.80    6.80
  -6   3   8   17.30    6.00
   6  -3   8    9.50    5.40
   6  -3   8    9.20    5.20
  -6   3   8    3.80    4.60
   6  -3   8    8.10    4.50
   6  -2  -8   13.80    5.50
   6  -2  -8   11.10    4.80
   6  -2  -8    5.50    5.60
   6  -2  -8   10.40    6.60
   6  -2  -8    9.10    5.40
  -6   2   8   11.10    5.20
  -6   2   8   18.90    7.00
  -6   2   8   27.10    7.60
   6  -2   8    8.90    4.70
   6  -1  -8    8.30    5.20
   6  -1  -8    7.80    4.60
   6  -1  -8    9.60    4.80
   6  -1  -8   11.00    5.10
   6  -1  -8   -1.20    3.50
  -6   1   8    5.60    3.90
  -6   1   8    8.20    5.60
  -6   1   8    4.20    5.80
  -6   1   8   11.50    4.80
   6   0  -8  296.87   19.80
   6   0  -8  306.57   20.80
   6   0  -8  310.57   17.20
   6   0  -8  333.67   18.80
   6   0  -8  304.57   18.80
  -6   0   8  334.57   22.40
  -6   0   8  311.07   19.10
  -6   0   8  329.07   24.10
  -6   0   8  309.07   18.70
  -6   0   8  253.87   17.40
  -6   0   8  273.97   21.00
  -6   0   8  289.87   19.50
   6   1  -8    5.40    4.10
   6   1  -8    2.40    6.30
   6   1  -8    8.80    4.50
   6   1  -8   11.40    4.80
   6   1  -8    8.30    4.20
   6   1  -8    7.50    4.70
  -6  -1   8   13.60   12.50
  -6  -1   8    3.90    3.30
  -6  -1   8   -1.00    2.70
  -6  -1   8    7.80    4.20
  -6  -1   8    6.20    4.10
   6   2  -8   11.00    6.90
   6   2  -8    8.20    4.30
   6   2  -8    5.20    4.10
  -6  -2   8   11.20    5.20
  -6  -2   8   15.50    7.50
  -6  -2   8   12.30    4.90
  -6  -2   8   12.60    6.50
  -6  -2   8   10.70    5.20
  -6  -2   8   10.10    5.40
  -6  -2   8    9.20    5.10
  -6  -2   8   16.60    5.50
   6   3  -8    7.60    6.90
   6   3  -8    9.10    5.20
   6   3  -8   13.30    4.80
  -6  -3   8    8.60    6.00
  -6  -3   8   10.80    4.70
  -6  -3   8    4.90    5.10
  -6  -3   8   15.10    6.00
  -6  -3   8    2.10    3.50
  -6  -3   8    8.10    5.40
  -6  -3   8    9.90    4.90
  -6  -3   8   17.20    9.10
  -6  -3   8   18.60    7.10
   6   4  -8   50.59   12.60
   6   4  -8   38.00    8.70
  -6  -4   8   51.29   10.00
  -6  -4   8   45.60    9.80
  -6  -4   8   42.00   11.00
  -6  -4   8   35.10    7.00
  -6  -4   8   47.70    9.00
  -6  -4   8   55.39    9.00
  -6  -4   8   54.09   13.30
  -6  -4   8   41.80    8.90
  -6  -4   8   54.59    8.90
   6   5  -8   10.00    5.80
   6   5  -8   26.90    8.70
  -6  -5   8   19.40    5.70
  -6  -5   8   22.50    6.00
  -6  -5   8   17.60    7.70
  -6  -5   8   11.10    6.90
  -6  -5   8   18.30    6.20
  -6  -5   8   13.80    6.20
  -6  -5   8   25.90    7.60
  -6  -5   8   15.70    5.20
  -6  -5   8   12.80    8.30
  -6  -5   8   27.90    7.50
  -6  -5   8   18.30    5.10
  -6  -6   8 1092.69   52.79
  -6  -6   8 1090.39   46.20
  -6  -6   8 1112.29   48.00
  -6  -6   8 1084.59   44.50
  -6  -6   8 1111.99   48.00
  -6  -6   8 1067.09   46.50
  -6  -6   8 1053.89   44.30
  -6  -6   8 1083.69   49.70
  -6  -6   8 1103.39   54.79
  -6  -6   8 1035.90   49.40
  -6  -7   8    4.10    3.50
  -6  -7   8   -1.50    3.20
  -6  -7   8    5.20    4.20
  -6  -7   8    4.00    5.60
  -6  -7   8    3.00    4.00
  -6  -7   8    9.80    4.10
  -6  -7   8    7.40    4.90
  -6  -7   8    5.30    2.90
  -6  -7   8    0.30    2.50
  -6  -8   8   -0.90    3.50
  -6  -8   8    3.70    3.60
  -6  -8   8    2.10    3.10
  -6  -8   8    3.60    3.30
  -6  -8   8    3.10    4.90
  -6  -9  -8   80.39    8.90
  -6  -9   8   93.19    8.20
  -6  -9   8   74.79   11.00
  -6  -9   8  107.99    7.80
  -6  -9   8  105.79    9.10
  -6   8  -9   82.09   10.70
   6  -8  -9   71.89    9.40
  -6   8   9   78.79    6.50
   6  -8   9   74.49    8.40
   6  -8   9   63.89    9.10
   6  -8   9   61.09    8.00
  -6   7  -9   24.20    7.40
   6  -7  -9    4.00    5.00
   6  -7   9    6.00    5.10
   6  -7   9    7.50    5.70
   6  -7   9   -1.10    3.20
  -6   6  -9    6.00    5.50
   6  -6  -9    0.80    4.10
  -6   6  -9   13.20    5.80
  -6   6  -9    6.30    4.90
   6  -6   9    1.90    3.90
   6  -6   9    2.50    4.50
   6  -6   9   12.00    4.50
   6  -6   9    5.50    4.10
   6  -5  -9    4.60    4.20
   6  -5  -9   17.20    6.90
  -6   5  -9   10.70    5.60
  -6   5  -9   10.60    5.90
  -6   5  -9   26.80    6.80
  -6   5   9    3.80    4.30
  -6   5   9    2.30    4.50
   6  -5   9    6.00    4.60
   6  -5   9   24.30    7.20
   6  -5   9   17.40    5.00
   6  -5   9   12.00    5.20
  -6   4  -9  231.38   15.00
   6  -4  -9  203.88   17.80
   6  -4  -9  232.48   16.00
   6  -4  -9  223.28   19.80
  -6   4  -9  204.98   15.80
  -6   4  -9  228.28   13.00
   6  -4  -9  205.38   15.30
  -6   4  -9  209.98   16.50
  -6   4  -9  228.88   16.60
   6  -4   9  211.58   17.90
  -6   4   9  227.68   16.60
   6  -4   9  235.48   15.80
   6  -4   9  229.18   15.00
   6  -4   9  239.68   17.50
   6  -4   9  221.18   16.90
   6  -3  -9    8.30    5.00
   6  -3  -9   19.40    7.60
  -6   3  -9   13.10    5.30
   6  -3  -9   20.00    8.00
   6  -3  -9   12.10    5.90
   6  -3   9   22.60    7.10
  -6   3   9   12.20    6.00
  -6   3   9    3.00    3.10
  -6   3   9   13.20    4.70
   6  -3   9   17.20    6.10
   6  -3   9    4.40    3.50
   6  -3   9   11.60    5.60
   6  -2  -9 2161.28   82.79
   6  -2  -9 2101.99   85.89
   6  -2  -9 2137.69   89.39
  -6   2  -9 1979.60   81.59
   6  -2  -9 2116.79   79.89
   6  -2  -9 2117.39   82.19
   6  -2  -9 2174.18   86.49
   6  -2   9 2046.00   84.69
  -6   2   9 2087.39   83.59
   6  -2   9 2356.06   85.19
  -6   2   9 1990.20   80.49
  -6   2   9 2055.89   79.99
   6  -1  -9    8.90    5.40
   6  -1  -9    3.90    5.40
   6  -1  -9    5.10    4.90
   6  -1  -9    9.40    5.60
   6  -1  -9    3.40    4.30
   6  -1   9    3.40    4.10
  -6   1   9    5.90    5.00
  -6   1   9    5.70    3.80
  -6   1   9    3.10    4.30
  -6   1   9    4.10    4.10
  -6   1   9    0.90    4.30
  -6   1   9    3.30    4.20
   6   0  -9    5.60    4.50
   6   0  -9    3.70    3.70
   6   0  -9    4.00    3.60
   6   0  -9    1.60    4.40
   6   0  -9    0.70    4.20
  -6   0   9   -0.90    2.80
  -6   0   9    4.80    4.10
  -6   0   9   -2.00    3.10
  -6   0   9    0.80    4.10
  -6   0   9    8.40    4.50
  -6   0   9   -2.30    3.00
  -6   0   9    1.10    2.70
  -6   0   9   -1.60    3.60
   6   1  -9    4.70    4.50
   6   1  -9    6.90    4.80
   6   1  -9    6.40    4.00
   6   1  -9   14.30    7.40
   6   1  -9    6.70    4.20
  -6  -1   9    1.20    4.30
  -6  -1   9    7.90    5.20
  -6  -1   9    3.90    4.50
  -6  -1   9    5.70    3.40
  -6  -1   9    5.80    4.60
  -6  -1   9    3.70    4.70
  -6  -1   9    8.40    6.00
  -6  -1   9   10.80    5.00
   6   2  -9 2385.96   86.09
   6   2  -9 2303.87   89.89
   6   2  -9 2244.68   88.59
   6   2  -9 2321.67   92.79
  -6  -2   9 2309.27   92.09
  -6  -2   9 2361.96   99.09
  -6  -2   9 2307.77   89.29
  -6  -2   9 2148.58   87.59
  -6  -2   9 2323.27   91.79
  -6  -2   9 2314.67   87.99
  -6  -2   9 2397.86   91.39
   6   3  -9   24.70   10.10
   6   3  -9    4.90    3.90
   6   3  -9   12.10    4.60
   6   3  -9    9.30    4.50
   6   3  -9   13.70    6.20
  -6  -3   9   12.30    5.30
  -6  -3   9   12.70    8.00
  -6  -3   9    6.40    3.50
  -6  -3   9   13.00    5.70
  -6  -3   9    5.40    4.80
  -6  -3   9    8.40    6.20
  -6  -3   9    3.10    3.20
  -6  -3   9    6.10    4.90
   6   4  -9  251.57   16.30
   6   4  -9  236.08   18.20
   6   4  -9  239.78   21.60
  -6  -4   9  257.37   18.30
  -6  -4   9  224.18   21.50
  -6  -4   9  219.18   15.70
  -6  -4   9  236.68   16.80
  -6  -4   9  266.57   19.30
  -6  -4   9  241.38   15.10
  -6  -4   9  250.87   15.60
  -6  -4   9  221.98   17.50
  -6  -5   9   20.70    7.70
  -6  -5   9    9.90    5.10
  -6  -5   9    3.30    5.10
  -6  -5   9   10.00    4.90
  -6  -5   9   14.40    5.10
  -6  -5   9    8.50    4.20
  -6  -5   9    2.30    4.00
  -6  -5   9   11.30    7.70
  -6  -5   9    8.10    5.00
  -6  -6   9    8.90    4.10
  -6  -6   9   15.90    6.20
  -6  -6   9    8.10    3.50
  -6  -6   9    9.10    4.70
  -6  -6   9   10.40    4.20
  -6  -6   9   13.50    4.90
  -6  -6   9    3.40    5.60
  -6  -6   9    2.20    3.90
  -6  -6   9    8.70    4.70
  -6  -7   9    8.90    5.00
  -6  -7   9    5.10    3.20
  -6  -7   9    8.10    4.30
  -6  -7   9    0.70    3.70
  -6  -7   9    0.20    2.80
  -6  -7   9    7.80    4.60
  -6  -7   9    9.10    5.30
  -6  -8   9   66.59    8.30
  -6  -8   9   59.29    7.50
  -6  -8   9   54.29    7.90
  -6  -8   9   60.79    8.90
  -6  -8   9   77.49    6.40
   6  -7 -10    8.00    4.30
  -6   7 -10   21.90    6.00
   6  -7  10   14.80    4.70
  -6   7  10    6.30    3.30
   6  -7  10    6.50    3.30
   6  -7  10    4.60    4.00
   6  -6 -10  378.06   23.00
  -6   6 -10  393.36   19.40
  -6   6 -10  392.26   21.00
  -6   6 -10  384.56   21.90
   6  -6  10  387.26   19.30
  -6   6  10  425.46   21.70
   6  -6  10  396.66   21.20
   6  -6  10  368.86   21.20
   6  -5 -10    3.70    3.80
  -6   5 -10    8.00    7.00
   6  -5 -10   22.00    7.40
  -6   5 -10   17.80    6.20
  -6   5 -10   14.50    5.30
   6  -5  10    4.60    4.20
   6  -5  10    9.80    5.20
   6  -5  10   10.50    4.20
   6  -5  10   13.90    5.20
  -6   4 -10  113.99   11.40
   6  -4 -10  133.29   11.60
   6  -4 -10  102.19   10.50
  -6   4 -10  128.69   12.60
   6  -4  10  121.49   13.90
  -6   4  10  115.39   10.90
   6  -4  10  122.29   11.80
   6  -4  10  130.29   10.90
   6  -4  10  125.29   10.70
  -6   3 -10   52.49    9.60
  -6   3 -10   46.70    8.50
   6  -3 -10   44.50    8.70
  -6   3  10   36.60    7.60
  -6   3  10   40.70    9.00
   6  -3  10   38.40    8.70
   6  -3  10   29.30    7.10
   6  -2 -10  390.16   20.80
   6  -2 -10  396.36   22.60
  -6   2  10  398.86   22.70
  -6   2  10  359.56   22.20
   6  -2  10  396.06   23.30
  -6   2  10  385.26   24.60
  -6   2  10  336.47   19.20
   6  -1 -10   24.90   11.80
   6  -1 -10   11.10    5.40
   6  -1 -10   11.50    5.60
   6  -1 -10   10.20    5.00
   6  -1 -10   12.70    5.40
  -6   1  10   12.80    4.80
  -6   1  10    9.90    5.30
  -6   1  10   18.00    6.00
  -6   1  10    3.80    3.10
   6  -1  10    6.40    5.10
  -6   1  10    0.00    3.50
  -6   1  10    3.70    4.70
  -6   1  10    4.30    4.40
   6   0 -10  420.36   25.90
   6   0 -10  460.05   23.10
   6   0 -10  431.06   27.20
   6   0 -10  457.05   24.60
  -6   0  10  460.15   25.20
  -6   0  10  428.66   25.90
  -6   0  10  458.75   23.90
  -6   0  10  443.76   24.50
  -6   0  10  406.76   22.80
  -6   0  10  428.16   23.90
  -6   0  10  365.86   21.60
   6   1 -10   12.10    5.60
   6   1 -10    8.20    4.30
   6   1 -10   14.70    6.70
   6   1 -10    9.90    4.40
  -6  -1  10   14.70    5.80
  -6  -1  10   14.50    5.70
  -6  -1  10   11.20    5.80
  -6  -1  10    7.70    4.40
  -6  -1  10    8.30    4.90
  -6  -1  10   13.50    5.70
  -6  -1  10   14.70    4.60
   6   2 -10  382.76   22.80
   6   2 -10  357.96   19.80
   6   2 -10  383.16   21.50
  -6  -2  10  417.96   28.40
  -6  -2  10  382.86   20.60
  -6  -2  10  362.46   20.60
  -6  -2  10  359.46   22.50
  -6  -2  10  341.47   20.10
  -6  -2  10  382.56   23.50
  -6  -2  10  390.46   21.90
  -6  -2  10  369.26   23.10
   6   3 -10   40.40    8.30
   6   3 -10   43.60    7.70
   6   3 -10   42.20    7.30
  -6  -3  10   35.90    6.60
  -6  -3  10   27.50    7.60
  -6  -3  10   40.30    8.90
  -6  -3  10   22.60    6.60
  -6  -3  10   29.40    7.40
  -6  -3  10   48.50    7.60
  -6  -3  10   34.70    7.10
  -6  -3  10   34.10    9.50
   6   4 -10  125.29    9.70
   6   4 -10  118.69   11.10
  -6  -4  10  125.59   14.60
  -6  -4  10  129.59   12.60
  -6  -4  10   82.49   11.60
  -6  -4  10  115.99   13.30
  -6  -4  10  109.19    9.60
  -6  -4  10  105.69    9.70
  -6  -4  10  111.59   11.40
  -6  -5  10   12.20    6.00
  -6  -5  10    6.10    3.40
  -6  -5  10    6.10    3.50
  -6  -5  10    8.20    3.40
  -6  -5  10   10.20    4.80
  -6  -5  10   11.40    4.90
  -6  -5  10    6.50    4.30
  -6  -5  10    7.40    4.80
  -6  -6  10  394.76   22.10
  -6  -6  10  401.16   23.10
  -6  -6  10  389.36   21.20
  -6  -6  10  405.86   18.80
  -6  -6  10  385.96   19.40
  -6  -6  10  392.86   28.30
  -6  -7  10    0.30    2.80
  -6  -7  10    2.90    3.00
  -6  -7  10    3.60    3.80
  -6  -7  10    7.10    3.50
   6  -6 -11   11.40    4.40
  -6   6 -11   10.80    3.80
  -6   6 -11   13.30    5.10
  -6   6  11    3.00    3.30
  -6   6  11    7.50    3.60
   6  -6  11    4.00    3.00
   6  -6  11    8.80    4.10
  -6   6  11    3.50    2.80
  -6   5 -11   10.00    5.80
   6  -5 -11   12.90    5.10
  -6   5 -11   16.50    5.10
  -6   5  11    6.20    4.30
  -6   5  11   15.40    4.70
  -6   5  11   14.10    4.70
   6  -5  11    9.50    4.40
   6  -5  11   12.10    5.40
  -6   4 -11  430.36   21.20
   6  -4 -11  452.75   22.00
  -6   4 -11  436.96   22.20
  -6   4 -11  423.26   22.80
   6  -4  11  449.06   20.40
  -6   4  11  415.26   23.50
   6  -4  11  426.36   25.50
  -6   4  11  423.46   23.60
  -6   4  11  418.76   21.40
   6  -4  11  389.06   24.00
  -6   4  11  447.46   22.70
  -6   3 -11   26.20    6.90
  -6   3 -11   21.30    7.40
   6  -3 -11   39.50    7.70
  -6   3  11   21.50    6.00
  -6   3  11   24.30    5.70
  -6   3  11   22.10    6.10
   6  -3  11   21.40    5.40
   6  -3  11   13.80    5.50
  -6   3  11   21.60    6.50
  -6   3  11   18.60    6.10
   6  -2 -11  476.95   24.60
  -6   2 -11  438.86   23.80
  -6   2  11  493.15   24.50
   6  -2  11  446.56   24.60
  -6   2  11  427.56   23.00
  -6   2  11  440.46   25.40
   6  -2  11  441.36   22.40
   6  -1 -11    1.90    4.60
  -6   1  11    9.90    4.60
  -6   1  11    2.10    4.10
  -6   1  11    0.10    3.70
   6  -1  11   10.50    5.40
  -6   1  11   12.90    4.70
  -6   1  11   12.60    6.70
  -6   1  11    2.00    4.10
   6   0 -11    0.00    3.60
   6   0 -11    4.30    4.10
  -6   0  11   -0.20    3.60
  -6   0  11   14.20    5.00
  -6   0  11    8.80    4.60
  -6   0  11    1.50    3.90
  -6   0  11    6.90    4.20
  -6   0  11    0.70    2.90
  -6   0  11    1.50    2.80
   6   1 -11   14.20    5.40
   6   1 -11    2.90    3.90
  -6  -1  11    9.40    4.40
  -6  -1  11    6.70    4.40
  -6  -1  11    3.60    3.60
  -6  -1  11    9.40    4.20
  -6  -1  11    5.60    4.60
  -6  -1  11    1.60    2.50
  -6  -1  11    9.80    5.00
   6   2 -11  462.05   23.50
  -6  -2  11  410.76   21.00
  -6  -2  11  460.25   22.90
  -6  -2  11  441.86   23.80
  -6  -2  11  458.75   22.00
  -6  -2  11  431.06   24.30
  -6  -2  11  434.56   24.30
  -6  -2  11  428.86   22.00
   6   3 -11   25.40    5.80
   6   3 -11   21.60    5.40
  -6  -3  11   21.90    6.50
  -6  -3  11   16.50    4.40
  -6  -3  11   15.70    4.30
  -6  -3  11   26.60    6.90
  -6  -3  11   14.40    5.00
  -6  -3  11    9.00    4.30
   6   4 -11  469.75   21.10
   6   4 -11  493.55   30.20
  -6  -4  11  424.76   25.30
  -6  -4  11  445.76   21.90
  -6  -4  11  414.86   23.20
  -6  -4  11  385.76   20.20
  -6  -4  11  464.85   24.40
  -6  -4  11  473.05   21.70
  -6  -4  11  464.15   20.70
   6   5 -11   19.60    6.10
  -6  -5  11   13.40    4.90
  -6  -5  11    4.40    3.50
  -6  -5  11   10.40    4.80
  -6  -5  11    7.30    4.10
  -6  -5  11    4.50    3.60
  -6  -6  11    3.40    3.20
  -6  -6  11    8.70    3.20
  -6  -6  11    2.10    3.30
  -6  -6  11    2.90    3.00
  -6   4 -12    7.80    5.50
   6  -4 -12   -3.50    2.20
  -6   4 -12    5.90    3.70
   6  -4  12    2.00    3.30
  -6   4  12    3.50    3.20
   6  -4  12    4.90    3.10
  -6   4  12   -2.00    2.30
  -6   4  12    4.40    3.00
   6  -3 -12   43.00    6.40
  -6   3 -12   39.10    6.70
  -6   3 -12   29.40    7.60
  -6   3  12   27.30    5.20
   6  -3  12   26.50    6.00
  -6   3  12   27.40    6.00
   6  -3  12   32.10    6.10
  -6   2 -12   14.10    5.10
   6  -2 -12   17.50    5.20
   6  -2  12   12.40    4.70
   6  -1 -12   10.70    4.70
   6  -1  12   13.20    4.70
  -6   1  12   12.20    4.90
  -6   1  12    9.80    4.00
  -6   1  12   21.70    5.20
   6   0 -12   21.00    5.60
   6   0 -12   16.70    4.40
  -6   0  12   17.30    5.80
  -6   0  12   22.60    5.90
  -6   0  12   16.70    4.80
  -6   0  12   15.80    4.20
   6   1 -12    3.60    3.70
   6   1 -12   29.40    5.20
  -6  -1  12   12.60    4.20
  -6  -1  12   17.10    5.00
  -6  -1  12   18.30    5.10
  -6  -1  12   13.10    4.20
  -6  -1  12   14.30    3.90
   6   2 -12   13.60    4.30
   6   2 -12   18.10    5.10
  -6  -2  12   15.10    4.60
  -6  -2  12   12.70    4.10
  -6  -2  12    7.80    4.10
  -6  -2  12   14.30    4.40
   6   3 -12   32.30    5.20
   6   3 -12   34.40    5.70
  -6  -3  12   17.30    4.60
  -6  -3  12   49.80    7.40
  -6  -3  12   22.90    5.20
  -6  -3  12   24.60    5.70
  -6  -3  12   35.10    5.00
  -6  -3  12   27.40    5.50
   6   4 -12   12.00    4.60
  -6  -4  12    4.10    3.00
  -6  -4  12   -0.40    2.30
  -6  -4  12    4.10    2.60
  -6  -4  12    3.10    3.10
  -6  -4  12    2.80    2.70
  -7  12   0    4.70    3.10
   7 -11   0  917.61   40.10
  -7  11   0  956.20   37.40
  -7  11   0  908.21   38.90
  -7  11   0  974.60   39.40
  -7  10   0    6.20    5.20
   7 -10   0    5.90    5.10
  -7  10   0   -0.80    3.60
  -7  10   0    8.10    4.60
  -7   9   0   93.89   18.00
  -7   9   0   97.09   13.20
   7  -9   0   96.49   13.40
  -7   9   0   88.09   11.40
  -7   9   0  111.59   10.00
  -7   8   0    6.80    4.90
   7  -8   0   -0.10    3.30
   7  -8   0    1.00    5.70
  -7   8   0    2.10    4.80
  -7   8   0    2.60    4.10
   7  -8   0    8.50    5.90
  -7   8   0    7.40    4.00
  -7   8   0    2.30    3.50
  -7   7   0  111.49   10.30
   7  -7   0  117.19   15.60
  -7   7   0  109.19    9.60
   7  -7   0  108.09   10.40
  -7   7   0  102.99    8.40
   7  -7   0  116.39   13.90
  -7   7   0  115.99   10.70
  -7   7   0   96.79   12.40
  -7   7   0  106.19   11.70
   7  -6   0   -1.30    1.90
  -7   6   0    1.20    3.10
  -7   6   0    2.90    4.70
  -7   6   0    0.50    2.80
  -7   6   0    5.20    3.40
   7  -6   0    5.70    4.50
   7  -6   0    4.70    3.90
  -7   6   0   -0.10    2.80
  -7   6   0    0.20    3.60
  -7   5   0 1374.26   53.19
  -7   5   0 1352.16   52.89
  -7   5   0 1355.56   51.99
   7  -5   0 1364.96   56.09
   7  -3   0   73.39    7.30
  -7   3   0   69.79    7.70
  -7   3   0   68.39    7.70
   7  -3   0   63.79    5.70
   7  -3   0   66.79    6.30
   7  -2   0    3.90    2.70
   7  -2   0    6.40    2.20
  -7   2   0   10.70    3.50
   7  -2   0    2.90    2.70
  -7   2   0    7.40    3.60
   7  -2   0    5.10    2.90
  -7   2   0   14.30    4.40
   7  -1   0 1722.03   66.59
   7  -1   0 1852.81   68.59
   7  -1   0 1978.00   67.69
   7  -1   0 1875.11   67.99
  -7   1   0 1754.92   66.99
  -7   1   0 1992.50   68.29
  -7   1   0 1951.70   67.79
   7   0   0    3.60    2.20
   7   0   0    1.80    2.30
  -7   0   0    8.80    2.80
  -7   0   0    4.40    3.00
   7   0   0    2.00    2.30
   7   0   0    5.60    2.50
  -7   0   0    2.10    2.40
   7   1   0 1911.41   69.29
   7   1   0 1932.41   70.29
   7   1   0 1988.20   69.99
  -7  -1   0 1904.21   69.79
  -7  -1   0 1975.00   69.29
   7   2   0    2.80    2.70
   7   3   0   76.29    6.30
   7   3   0   70.79    6.70
   7   4   0   -3.00    2.00
   7   4   0    2.20    2.60
   7   4   0    4.40    2.60
  -7  -5   0 1290.87   52.59
   7   5   0 1377.86   51.39
  -7  -5   0 1317.47   58.19
  -7  -5   0 1391.56   60.09
  -7  -6   0   -1.50    3.50
  -7  -6   0    6.50    6.40
  -7  -6   0   -1.80    5.10
   7   6   0    2.70    2.40
  -7  -6   0    5.60    3.00
  -7  -6   0    3.40    3.50
   7   6   0    1.00    2.40
  -7  -7   0  106.49   18.10
  -7  -7   0  105.39   18.00
   7   7   0  109.59    8.60
  -7  -7   0  131.59   12.20
  -7  -7   0  105.29   16.50
  -7  -7   0   78.29   11.60
   7   7   0  102.29    9.10
  -7  -7   0   90.19   12.20
  -7  -7   0  111.39   10.50
  -7  -7   0  108.09   17.30
  -7  -8   0    2.60    5.90
  -7  -8   0   -2.60    3.40
  -7  -8   0    0.30    6.60
  -7  -8   0    9.10    5.50
  -7  -8   0    5.60    5.00
   7   8   0    1.80    2.70
   7   8   0    5.00    3.40
  -7  -8   0    9.60    4.80
  -7  -9   0   81.69   13.80
  -7  -9   0   83.09   12.90
  -7  -9   0  102.49   17.50
   7   9   0  117.69    9.00
  -7  -9   0   86.99   12.60
  -7  -9   0   65.89   13.20
  -7 -10   0    0.70    6.10
  -7 -10   0    5.20    6.60
  -7 -10   0    3.30    4.00
  -7 -10   0    5.20    4.10
   7  10   0   13.20    8.90
  -7 -11   0  908.51   47.40
   7  11   0  895.81   35.00
  -7 -11   0  862.91   41.90
  -7 -12   0    4.00    3.60
  -7  11  -1  141.09   10.70
  -7  11  -1  133.29    9.70
   7 -11  -1  131.89   11.10
  -7  11  -1  117.69   10.70
  -7  11   1  132.99   11.20
  -7  11   1  144.89    9.80
   7 -11   1  141.89   11.80
  -7  11   1  135.19   10.50
  -7  10  -1   11.40    4.80
  -7  10  -1   20.60    5.60
   7 -10  -1    9.40    4.60
   7 -10  -1    2.80    4.80
  -7  10  -1    9.90    5.20
  -7  10   1    9.00    4.50
   7 -10   1   -1.60    4.80
  -7  10   1    7.00    5.40
  -7  10   1    4.80    4.10
   7  -9  -1   54.99   10.30
  -7   9  -1   73.79   12.20
   7  -9  -1   68.09    9.20
  -7   9  -1   95.69   11.10
  -7   9  -1   74.89   10.50
   7  -9  -1   54.69    9.20
  -7   9   1   74.59   12.10
  -7   9   1   54.69    8.60
   7  -9   1   57.99   12.80
  -7   9   1   65.69    9.70
   7  -9   1   61.99   11.10
   7  -9   1   63.59    9.10
   7  -8  -1   49.20    9.10
  -7   8  -1   48.50   10.50
  -7   8  -1   36.80    6.80
   7  -8  -1   58.29    8.50
  -7   8  -1   49.80    9.40
   7  -8  -1   36.20    9.60
  -7   8  -1   43.70    7.90
  -7   8   1   57.49   10.60
   7  -8   1   48.00    6.80
  -7   8   1   38.90    7.70
   7  -8   1   31.60    8.90
   7  -8   1   38.80    8.60
  -7   8   1   49.30    9.30
  -7   8   1   53.79    9.70
   7  -8   1   44.20    8.50
  -7   8   1   46.90    8.20
   7  -7  -1  118.79   16.30
   7  -7  -1  100.09   18.50
  -7   7  -1  109.69   12.30
  -7   7  -1  140.09    9.40
   7  -7  -1  104.39   13.40
  -7   7  -1  120.59   10.70
  -7   7  -1  114.29   10.30
  -7   7  -1  143.39   11.80
  -7   7  -1  121.79   11.80
   7  -7  -1  102.29   12.10
   7  -7   1  118.99   10.30
   7  -7   1  136.59   14.00
  -7   7   1  130.49   11.20
  -7   7   1  117.49   11.00
  -7   7   1  108.49   11.10
   7  -7   1  131.79   12.40
  -7   7   1  106.19    9.60
  -7   7   1  111.59   11.70
   7  -7   1  119.99   11.30
  -7   6  -1   32.80    6.40
   7  -6  -1   19.50    5.00
  -7   6  -1   25.70    5.80
   7  -6  -1   18.90    6.50
  -7   6  -1   22.10    7.40
  -7   6  -1   31.10    7.70
   7  -6   1   23.10    7.30
   7  -6   1   33.60    7.30
  -7   6   1   27.10    7.50
  -7   6   1   37.10    7.50
  -7   6   1   26.90    5.80
  -7   6   1   24.40    6.00
  -7   6   1   20.10    5.50
  -7   5  -1  234.98   13.80
  -7   5  -1  250.47   14.40
   7  -5  -1  230.18   16.00
  -7   5   1  243.68   13.60
  -7   5   1  247.58   14.40
  -7   5   1  241.28   14.40
  -7   3  -1 6924.41  237.08
   7  -3  -1 6946.41  238.58
  -7   3  -1 7051.49  237.68
   7  -3  -1 6730.73  238.28
  -7   3   1 6742.13  237.98
  -7   3   1 6743.42  237.78
   7  -2  -1  581.84   24.60
   7  -2  -1  548.45   24.00
   7  -2  -1  588.24   23.30
   7  -2  -1  572.84   23.70
   7  -2  -1  535.15   22.90
  -7   2  -1  582.34   24.50
  -7   2  -1  600.44   24.40
  -7   2  -1  585.64   26.80
   7  -2   1  545.75   23.00
  -7   2   1  579.54   24.10
  -7   2   1  575.14   24.00
  -7   2   1  567.44   23.50
  -7   2   1  594.14   24.50
   7  -2   1  566.64   25.20
   7  -1  -1  350.96   15.90
   7  -1  -1  342.47   15.50
   7  -1  -1  341.77   15.60
   7  -1  -1  367.56   17.00
  -7   1  -1  340.07   16.50
  -7   1  -1  345.77   16.30
  -7   1  -1  346.27   16.50
   7  -1   1  377.16   17.30
  -7   1   1  347.57   15.50
   7  -1   1  375.86   16.80
  -7   1   1  377.76   16.70
  -7   1   1  375.76   16.30
  -7   0  -1   -2.00    2.80
   7   0  -1    1.70    2.40
   7   0  -1    1.70    2.30
   7   0  -1    0.80    2.00
   7   0   1    0.00    2.00
  -7   0   1    3.60    2.40
   7   0   1   -0.10    2.20
   7   0   1    3.40    2.60
   7   1  -1  363.46   15.60
   7   1  -1  358.16   15.50
   7   1  -1  342.47   16.10
   7   1  -1  379.26   16.70
   7   1   1  356.96   15.70
   7   2  -1  611.04   24.00
   7   2  -1  611.64   24.90
   7   2   1  622.44   25.20
   7   2   1  568.54   24.20
   7   3  -1 6674.13  238.58
   7   3  -1 7512.65  239.98
  -7  -3   1 6761.22  241.38
   7   3   1 6889.51  238.68
   7   3   1 6884.41  239.38
   7   4  -1  266.77   13.10
   7   4  -1  240.48   13.30
   7   4   1  250.07   12.90
  -7  -4   1  239.38   14.90
  -7  -4   1  242.48   14.70
   7   4   1  267.67   14.20
   7   5  -1  242.28   13.30
  -7  -5  -1  253.67   15.30
  -7  -5   1  269.77   19.20
  -7  -5   1  279.77   22.20
  -7  -5   1  242.88   15.30
   7   5   1  249.58   13.90
  -7  -5   1  264.27   15.60
  -7  -5   1  253.27   20.10
  -7  -5   1  247.38   15.10
   7   5   1  249.58   13.20
  -7  -6  -1   20.90    7.10
   7   6  -1   24.40    5.00
  -7  -6  -1   25.50    5.90
  -7  -6  -1   29.50    9.40
   7   6   1   19.20    4.60
   7   6   1   38.60    6.40
  -7  -6   1   22.80    5.60
  -7  -6   1   32.70   10.40
  -7  -6   1   29.80    9.10
   7   6   1   27.80    5.70
  -7  -6   1   22.60    6.20
  -7  -6   1   19.60    5.90
  -7  -6   1   22.10    8.60
   7   7  -1  123.59    9.70
  -7  -7  -1  129.79   10.00
  -7  -7  -1  107.39   14.00
  -7  -7  -1  123.59   20.00
  -7  -7  -1   88.59   12.60
  -7  -7  -1   99.69   13.00
  -7  -7  -1  129.19   11.60
   7   7   1  113.09   16.60
  -7  -7   1  118.19   10.50
  -7  -7   1  120.29   14.40
   7   7   1  119.89   10.20
  -7  -7   1  103.79   16.80
  -7  -7   1  124.79   19.50
  -7  -7   1   97.29   15.60
  -7  -7   1  119.59   11.70
   7   7   1  107.69    8.90
  -7  -7   1  119.99   12.00
   7   7   1  101.79    9.60
  -7  -8  -1   36.60    8.90
  -7  -8  -1   51.39   10.30
  -7  -8  -1   22.30    8.30
  -7  -8  -1   51.09   13.10
  -7  -8  -1   49.40   12.80
  -7  -8   1   61.99   13.90
   7   8   1   42.90    7.20
  -7  -8   1   39.90   10.30
   7   8   1   41.10    6.70
   7   8   1   35.70    7.50
  -7  -8   1   49.90   11.90
  -7  -8   1   46.30    9.40
  -7  -8   1   48.90    8.70
   7   8   1   49.50   10.00
  -7  -8   1   39.00    8.60
  -7  -8   1   44.40    7.80
  -7  -9  -1   59.49   11.10
  -7  -9  -1   52.19   11.30
  -7  -9  -1   75.29   15.90
  -7  -9  -1   56.09   12.50
  -7  -9  -1   59.29   10.70
  -7  -9   1   51.59    9.80
  -7  -9   1   60.99   12.80
  -7  -9   1   47.10   11.50
   7   9   1   65.79    8.40
   7   9   1   55.89    8.80
  -7  -9   1   40.00    9.00
  -7  -9   1   54.39   13.10
   7   9   1   64.89   10.20
  -7 -10  -1    9.50    8.30
  -7 -10  -1    8.70    5.00
  -7 -10  -1   13.30    5.80
  -7 -10  -1    9.80    6.40
   7  10   1   13.20    5.20
  -7 -10   1    2.00    6.00
  -7 -10   1    3.10    6.10
  -7 -10   1    6.40    4.30
  -7 -10   1    3.70    4.20
   7  10   1    7.70    4.70
   7  10   1    9.80    4.10
  -7 -11  -1  113.89   14.80
   7  11   1  120.59    9.40
  -7 -11   1   98.19   13.50
   7  11   1  122.79    8.50
   7  11   1  131.09   10.50
  -7  11  -2  640.44   28.70
  -7  11  -2  682.43   28.70
   7 -11  -2  631.24   28.70
  -7  11  -2  678.63   27.20
   7 -11   2  630.14   36.10
  -7  11   2  671.83   29.00
  -7  11   2  645.64   29.10
   7 -11   2  638.44   30.00
  -7  11   2  608.84   27.10
  -7  10  -2  214.28   26.30
  -7  10  -2  195.48   15.10
   7 -10  -2  212.08   15.20
  -7  10  -2  213.68   13.10
   7 -10  -2  208.48   14.90
  -7  10   2  209.68   13.10
  -7  10   2  225.88   15.90
  -7  10   2  200.68   14.60
   7 -10   2  196.78   16.00
  -7   9  -2   81.99   12.30
  -7   9  -2   82.79    8.90
   7  -9  -2   74.59   10.80
  -7   9  -2   93.69   11.00
  -7   9  -2   70.89   10.50
   7  -9  -2  104.99   11.90
  -7   9   2   63.59    9.90
   7  -9   2   79.19   15.10
  -7   9   2  106.09   11.40
   7  -9   2   69.49   10.80
   7  -9   2   77.09   10.50
  -7   9   2   82.99   10.80
  -7   8  -2   46.50    9.80
  -7   8  -2   36.70    8.10
   7  -8  -2   21.50    6.40
  -7   8  -2   30.10    7.80
  -7   8  -2   33.20    7.00
   7  -8  -2   16.50    6.50
  -7   8   2   28.60    8.40
  -7   8   2   23.70    6.50
   7  -8   2   25.30    7.90
  -7   8   2   26.70    6.40
   7  -8   2   26.10    9.00
  -7   8   2   33.50    7.20
   7  -8   2   30.30    7.60
  -7   8   2   17.10    5.70
   7  -7  -2 1364.96   57.79
  -7   7  -2 1469.05   56.29
  -7   7  -2 1307.87   58.19
  -7   7  -2 1386.36   57.09
   7  -7  -2 1502.15   59.79
  -7   7  -2 1396.06   58.79
  -7   7  -2 1535.55   55.39
  -7   7   2 1343.07   59.59
   7  -7   2 1322.17   56.59
  -7   7   2 1369.86   57.19
  -7   7   2 1406.66   58.29
  -7   7   2 1393.26   58.39
   7  -7   2 1389.36   58.29
   7  -7   2 1410.26   58.39
  -7   7   2 1481.95   55.09
   7  -7   2 1459.55   63.29
   7  -6  -2    9.90    5.90
  -7   6  -2    6.20    5.30
  -7   6  -2    6.50    5.70
  -7   6  -2    6.10    5.00
  -7   6  -2    5.00    4.90
  -7   6  -2    3.20    3.70
   7  -6  -2    0.50    3.00
  -7   6   2    2.70    3.90
   7  -6   2    5.20    4.00
  -7   6   2    6.20    3.90
   7  -6   2    1.50    3.00
  -7   6   2    7.40    3.70
   7  -6   2    5.50    5.40
  -7   6   2    7.60    4.00
  -7   5  -2 1545.75   57.99
  -7   5  -2 1511.25   57.09
  -7   5  -2 1556.14   57.99
   7  -5  -2 1456.45   60.69
   7  -5  -2 1426.06   60.49
   7  -5   2 1606.44   62.49
   7  -5   2 1365.96   58.89
  -7   5   2 1506.35   58.19
  -7   5   2 1563.84   60.19
  -7   5   2 1569.94   59.09
  -7   5   2 1385.76   59.19
  -7   4  -2  184.78   11.70
   7  -4   2  189.58   13.50
   7  -3  -2 1598.14   59.29
   7  -3  -2 1621.34   61.19
  -7   3  -2 1585.04   62.69
   7  -3  -2 1629.84   62.09
   7  -3  -2 1643.54   60.39
  -7   3   2 1632.54   60.79
   7  -3   2 1667.93   63.19
  -7   3   2 1672.53   59.89
   7  -2  -2  754.12   29.80
   7  -2  -2  722.33   28.60
  -7   2  -2  742.73   29.80
   7  -2  -2  683.73   30.40
   7  -2  -2  718.13   29.50
  -7   2  -2  739.93   29.70
  -7   2  -2  749.53   32.80
  -7   2   2  707.03   28.40
   7  -2   2  710.53   29.10
   7  -2   2  766.52   28.10
  -7   2   2  697.83   29.20
   7  -2   2  763.72   31.40
  -7   2   2  693.93   27.70
  -7   1  -2   70.19    7.50
   7  -1  -2   63.89    5.00
   7  -1  -2   54.39    5.40
   7  -1  -2   64.49    7.60
   7  -1  -2   62.69    6.00
   7  -1  -2   58.89    5.90
  -7   1   2   71.99    5.90
   7  -1   2   56.79    5.70
   7  -1   2   61.39    7.60
  -7   1   2   78.19    6.10
   7   0  -2   71.19    6.40
   7   0  -2   63.79    5.90
   7   0  -2   62.09    5.30
  -7   0   2   67.19    5.30
  -7   0   2   63.89    6.50
   7   0   2   55.39    4.80
  -7   0   2   63.09    5.30
   7   0   2   62.29    5.90
   7   1  -2   72.89    6.30
   7   1  -2   72.39    5.70
   7   1  -2   62.79    5.70
  -7  -1   2   79.79    7.10
   7   2  -2  741.53   28.30
   7   2  -2  737.33   29.50
   7   2  -2  768.32   29.40
  -7  -2   2  684.13   30.10
   7   2   2  727.23   29.50
   7   3  -2 1774.92   62.39
  -7  -3   2 1625.14   63.89
  -7  -3   2 1687.73   63.89
   7   3   2 1716.53   62.49
   7   4  -2  180.68   10.50
  -7  -4   2  192.18   12.50
   7   4   2  174.78   10.70
  -7  -4   2  186.48   12.10
   7   5  -2 1694.93   60.49
  -7  -5   2 1552.54   71.69
   7   5   2 1569.74   62.59
   7   5   2 1515.25   60.29
  -7  -5   2 1558.24   62.79
  -7  -5   2 1748.93   74.39
  -7  -5   2 1712.53   66.59
  -7  -5   2 1597.24   63.49
  -7  -5   2 1653.33   71.69
  -7  -6  -2    1.10    2.60
  -7  -6  -2    5.40    4.70
  -7  -6   2    5.10    5.50
  -7  -6   2    1.50    3.30
  -7  -6   2    5.00    3.80
   7   6   2    5.10    3.60
  -7  -6   2    6.80    4.10
   7   6   2   10.50    4.10
  -7  -6   2   12.20    5.30
  -7  -6   2    2.50    5.30
   7   6   2    1.60    2.90
  -7  -6   2   10.20    4.80
  -7  -6   2    2.80    4.50
  -7  -7  -2 1434.06   73.49
  -7  -7  -2 1449.15   61.59
  -7  -7   2 1383.56   58.29
  -7  -7   2 1425.36   60.09
  -7  -7   2 1433.06   59.09
   7   7   2 1472.75   58.39
  -7  -7   2 1382.76   57.39
  -7  -7   2 1414.06   58.99
  -7  -7   2 1507.65   77.09
  -7  -7   2 1365.96   64.19
  -7  -7   2 1584.14   73.19
   7   7   2 1441.66   54.09
   7   7   2 1416.96   58.19
   7   7   2 1411.26   58.99
  -7  -7   2 1649.73   75.59
  -7  -7   2 1378.16   56.89
  -7  -8  -2   38.10    6.60
  -7  -8  -2   44.20   11.60
  -7  -8  -2   32.20   10.70
  -7  -8  -2   23.10    7.60
  -7  -8  -2   20.10    6.90
   7   8   2   27.00    5.90
  -7  -8   2   30.40    6.60
  -7  -8   2   33.20    6.40
   7   8   2   21.00    5.40
   7   8   2   27.90    7.10
  -7  -8   2   25.10    6.80
  -7  -8   2   22.00    6.20
  -7  -8   2   34.20   10.30
   7   8   2   33.20    6.90
  -7  -8   2   27.10    9.60
  -7  -8   2   21.00    9.60
  -7  -8   2   38.10   11.40
  -7  -8   2   25.60    7.30
  -7  -9  -2   58.99   12.70
  -7  -9  -2   59.79   12.50
  -7  -9  -2   51.19   10.50
  -7  -9  -2   74.29   15.30
   7   9   2   68.89    9.50
  -7  -9   2   72.29   12.50
  -7  -9   2   71.59   14.20
  -7  -9   2   86.19   15.00
  -7  -9   2   55.59    9.10
   7   9   2   80.79   11.40
   7   9   2   73.39    8.90
  -7  -9   2   90.09   13.00
  -7 -10  -2  212.88   18.90
  -7 -10  -2  187.48   16.30
  -7 -10  -2  213.78   20.10
   7  10   2  205.78   12.70
  -7 -10   2  205.38   19.40
  -7 -10   2  218.98   15.70
   7  10   2  203.18   13.80
  -7 -10   2  244.88   20.70
  -7 -10   2  200.28   17.00
  -7 -10   2  218.48   15.10
   7  10   2  209.58   14.90
  -7 -11  -2  612.84   31.50
  -7 -11  -2  606.44   31.70
  -7 -11   2  591.04   31.80
  -7 -11   2  598.24   30.20
   7  11   2  567.54   25.60
   7  11   2  561.74   24.60
   7  11   2  577.84   26.40
   7 -11  -3  112.99   10.00
  -7  11  -3  156.68    9.40
   7 -11   3  141.69   11.60
  -7  11   3  129.09    9.20
  -7  11   3  116.99    9.60
  -7  11   3  142.89   10.50
  -7  10  -3   52.99    8.70
   7 -10  -3   25.00    5.30
  -7  10  -3   51.69    7.30
  -7  10  -3   55.59    9.90
   7 -10  -3   37.70    8.30
  -7  10   3   32.40    6.90
  -7  10   3   40.40    6.70
   7 -10   3   41.30    9.30
  -7  10   3   46.40    9.40
   7  -9  -3  274.97   17.50
   7  -9  -3  284.07   17.60
  -7   9  -3  247.38   15.80
  -7   9  -3  274.77   18.30
  -7   9  -3  265.67   17.70
   7  -9   3  234.68   18.10
  -7   9   3  272.17   18.30
   7  -9   3  247.28   16.80
  -7   9   3  293.07   18.30
  -7   9   3  255.37   15.40
  -7   8  -3   51.99    9.50
   7  -8  -3   55.39    9.80
  -7   8  -3   70.09   12.30
  -7   8  -3   68.39   10.30
  -7   8  -3   53.09    8.00
   7  -8  -3   67.59   10.50
  -7   8   3   61.39    9.50
   7  -8   3   61.39   10.00
  -7   8   3   51.29    8.90
   7  -8   3   54.09   10.40
  -7   8   3   44.90    8.80
   7  -8   3   74.59   10.70
  -7   8   3   56.89    8.10
   7  -8   3   44.20   10.40
  -7   7  -3  169.38   15.90
   7  -7  -3  177.88   14.90
  -7   7  -3  175.78   15.10
   7  -7  -3  185.88   15.30
  -7   7   3  183.18   14.90
   7  -7   3  199.58   17.90
  -7   7   3  186.28   12.80
   7  -7   3  189.98   15.40
  -7   7   3  183.58   14.60
  -7   7   3  180.08   14.60
   7  -7   3  188.38   14.70
   7  -7   3  181.38   14.90
  -7   6  -3   81.19   11.10
   7  -6  -3   51.69    9.00
  -7   6  -3   88.89   10.50
  -7   6  -3   82.79    8.70
   7  -6   3   82.19   11.20
  -7   6   3   68.29   10.00
  -7   6   3   88.99   11.30
   7  -6   3   90.89   14.00
  -7   6   3   84.09   12.30
   7  -6   3   88.89   11.80
   7  -6   3   67.39    9.90
  -7   6   3   60.79    9.40
  -7   5  -3  748.13   33.00
   7  -5  -3  707.23   36.30
  -7   5  -3  783.42   32.70
   7  -5  -3  700.93   31.20
  -7   5  -3  740.03   31.90
   7  -5   3  723.83   34.00
  -7   5   3  775.92   31.50
  -7   5   3  768.32   33.20
  -7   5   3  774.02   34.60
  -7   5   3  762.32   34.10
   7  -5   3  795.52   34.80
   7  -5   3  751.72   36.50
  -7   4  -3  717.13   30.90
  -7   4  -3  704.93   30.20
  -7   4  -3  692.13   30.20
   7  -4   3  758.82   35.40
  -7   3  -3 1513.65   56.59
   7  -3  -3 1498.75   56.59
  -7   3  -3 1431.86   59.19
   7  -3  -3 1540.25   57.39
   7  -3  -3 1463.95   58.19
  -7   3  -3 1512.55   56.79
   7  -3  -3 1480.25   55.39
   7  -3   3 1508.05   59.29
  -7   3   3 1563.24   56.99
  -7   3   3 1490.15   57.79
  -7   3   3 1509.45   55.59
  -7   2  -3    7.00    3.20
   7  -2  -3    8.00    3.40
   7  -2  -3   14.20    3.60
   7  -2  -3   11.00    3.90
  -7   2  -3   10.80    5.70
  -7   2   3   15.30    4.20
   7  -2   3    5.80    3.40
  -7   2   3   12.20    5.00
   7  -1  -3  182.18   10.20
   7  -1  -3  171.18   10.60
   7  -1  -3  145.69    9.50
   7  -1  -3  160.78   10.40
   7  -1   3  173.48   11.40
  -7   1   3  142.29    9.90
  -7   1   3  156.48    9.30
  -7   1   3  152.08   10.30
   7   0  -3    2.80    2.70
   7   0  -3   -0.60    2.50
   7   0  -3    1.10    2.50
  -7   0   3    1.20    2.60
   7   1  -3  165.38   10.00
   7   1  -3  173.98   10.60
  -7  -1   3  167.68   10.90
   7   2  -3    7.20    3.10
   7   2  -3   11.60    3.20
   7   2  -3   17.00    3.60
  -7  -2   3   10.40    3.80
  -7  -2   3   11.00    3.80
   7   3  -3 1682.13   58.89
   7   3  -3 1542.05   58.49
  -7  -3   3 1543.35   60.29
  -7  -3   3 1584.94   60.79
   7   4  -3  746.43   30.10
  -7  -4   3  720.93   32.50
  -7  -4   3  829.42   40.00
  -7  -4   3  751.62   38.90
  -7  -4   3  713.53   32.10
  -7  -4   3  763.12   40.30
  -7  -5   3  841.42   42.30
  -7  -5   3  791.22   36.10
  -7  -5   3  750.92   36.90
  -7  -5   3  872.11   36.40
  -7  -5   3  849.61   43.10
  -7  -5   3  852.11   39.90
  -7  -5   3  843.92   37.40
  -7  -5   3  877.91   45.10
  -7  -6  -3   68.99   12.20
  -7  -6   3   69.79    9.50
   7   6   3   71.49   10.90
  -7  -6   3   94.89   16.40
  -7  -6   3   61.79    8.80
  -7  -6   3   89.69   11.40
   7   6   3   55.89    8.50
  -7  -6   3   79.99    9.80
   7   6   3   75.79    9.90
  -7  -6   3   69.09   12.90
  -7  -6   3   94.29   11.00
  -7  -6   3   95.19   11.60
  -7  -6   3   76.79   11.20
  -7  -6   3   77.49   11.00
  -7  -6   3   72.79   13.40
   7   6   3   71.89    9.00
  -7  -7  -3  164.08   15.90
  -7  -7  -3  178.98   13.90
  -7  -7   3  210.28   16.20
  -7  -7   3  220.58   20.10
   7   7   3  167.38   15.40
  -7  -7   3  165.48   13.60
   7   7   3  184.98   14.60
  -7  -7   3  173.28   14.10
  -7  -7   3  197.08   19.60
   7   7   3  192.48   14.10
  -7  -7   3  180.28   17.20
   7   7   3  188.98   12.70
  -7  -7   3  203.78   20.30
  -7  -7   3  175.68   13.00
  -7  -7   3  205.78   14.30
  -7  -8  -3   46.40   10.10
  -7  -8  -3   37.70   11.50
  -7  -8  -3   59.99   12.40
  -7  -8  -3   58.09    8.80
  -7  -8  -3   44.10   10.20
  -7  -8   3   56.39   10.20
  -7  -8   3   50.09   11.00
   7   8   3   48.20    7.90
  -7  -8   3   69.19   11.80
   7   8   3   49.20    8.20
   7   8   3   57.39   10.00
  -7  -8   3   82.19   14.90
   7   8   3   50.49    8.90
  -7  -8   3   59.19    9.30
   7   8   3   61.29    9.30
  -7  -8   3   61.09    9.90
  -7  -8   3   52.39   13.30
  -7  -8   3   49.99   12.40
  -7  -8   3   49.60    8.30
  -7  -9  -3  272.37   20.10
  -7  -9  -3  276.07   23.90
  -7  -9  -3  257.87   22.20
  -7  -9   3  299.27   24.00
  -7  -9   3  279.27   18.00
  -7  -9   3  243.08   20.80
   7   9   3  292.47   17.20
   7   9   3  238.68   15.30
   7   9   3  261.47   17.70
  -7  -9   3  265.47   22.80
  -7  -9   3  263.67   17.70
  -7  -9   3  265.47   16.10
  -7 -10  -3   34.70    9.40
  -7 -10  -3   31.20    9.50
  -7 -10  -3   41.50   10.70
  -7 -10   3   24.70    8.80
  -7 -10   3   36.70    9.10
  -7 -10   3   24.80    6.20
   7  10   3   39.50    6.60
  -7 -10   3   31.00   10.20
  -7 -11  -3  150.68   13.80
  -7 -11  -3  120.89   14.90
   7  11   3  138.39    9.40
  -7 -11   3  113.09   14.00
   7  11   3  137.29   10.50
  -7 -11   3  137.19   12.80
   7 -11  -4  184.78   12.30
  -7  11  -4  206.08   12.40
  -7  11   4  198.58   11.90
   7 -11   4  201.38   13.20
  -7  11   4  191.98   12.20
  -7  10  -4   82.89   11.10
   7 -10  -4   40.50    7.50
   7 -10  -4   58.69    7.70
   7 -10   4   51.29    8.20
  -7  10   4   52.19    7.80
   7 -10   4   54.99    9.30
  -7  10   4   50.99    7.10
  -7  10   4   48.90    8.60
  -7   9  -4   -3.80    4.20
  -7   9  -4    7.80    6.50
   7  -9  -4   -1.50    3.00
   7  -9   4   -2.10    4.30
  -7   9   4    4.50    5.60
  -7   9   4   -0.60    3.10
  -7   9   4    6.70    4.10
   7  -9   4    8.40    5.10
  -7   8  -4    2.40    3.40
   7  -8  -4    6.00    4.80
   7  -8  -4   -2.10    4.10
  -7   8  -4    6.10    6.20
  -7   8  -4    4.00    5.00
  -7   8   4    6.60    4.80
  -7   8   4    0.80    3.30
   7  -8   4    9.50    5.20
  -7   8   4   -1.70    4.50
  -7   8   4   11.60    5.00
   7  -8   4   10.10    4.80
   7  -8   4   -1.80    4.70
  -7   7  -4  433.76   21.70
  -7   7  -4  389.26   21.20
   7  -7  -4  388.66   24.30
  -7   7  -4  382.56   30.20
   7  -7   4  442.56   24.50
   7  -7   4  382.16   26.50
   7  -7   4  400.56   23.60
  -7   7   4  366.16   23.60
  -7   7   4  404.76   20.40
  -7   7   4  413.96   23.10
  -7   7   4  406.36   22.90
  -7   7   4  402.66   23.30
   7  -7   4  384.86   22.70
  -7   6  -4   40.30    7.80
   7  -6  -4   44.00    9.40
   7  -6   4   37.40    8.10
  -7   6   4   41.10    7.70
  -7   6   4   40.60    7.40
  -7   6   4   36.90    6.80
   7  -6   4   30.60    8.50
  -7   6   4   25.00    6.30
   7  -6   4   21.50    7.30
  -7   6   4   39.70    9.00
   7  -6   4   32.30    7.20
  -7   5  -4 1051.79   41.70
   7  -5  -4  968.50   41.10
   7  -5  -4  987.50   42.40
  -7   5  -4 1036.80   46.00
  -7   5  -4  903.41   51.29
   7  -5  -4 1013.00   40.80
  -7   5  -4  987.40   42.70
   7  -5  -4 1024.40   46.50
  -7   5  -4 1115.19   42.30
   7  -5   4 1017.00   44.30
  -7   5   4 1140.89   44.70
   7  -5   4 1037.60   47.00
  -7   5   4 1050.69   43.00
   7  -5   4  946.11   43.90
   7  -5   4 1012.00   44.20
   7  -5   4 1041.70   44.20
  -7   5   4 1048.40   43.40
  -7   5   4  994.90   40.40
   7  -4  -4    8.00    3.60
  -7   4  -4    8.70    4.90
  -7   4  -4   18.20    5.40
  -7   4  -4    3.50    3.60
  -7   4  -4    8.50    4.60
   7  -4  -4    5.40    3.60
   7  -4  -4   11.40    5.80
   7  -4   4    1.20    3.80
   7  -4   4   10.00    5.00
  -7   3  -4   66.09    7.00
  -7   3  -4   77.59    9.10
   7  -3  -4   56.09    8.00
[truncated: 538,302 more chars]
