# Supplementary material for: Energetic Features of H-bonded and π-stacked Assemblies in Pyrazole-based Coordination Compounds of Mn(II) and Cu(II): Experimental and Theoretical Studies
Source: Preprints.org preprint supplement (doi:10.20944/preprints202403.0550.v1), 2024-03-11
Supplement: Supplementary file 3 [file supplementary › MnCl2_DMP_bz.cif]

 
data_shelx
 
_audit_creation_method            'SHELXL-2018/3'
_shelx_SHELXL_version_number      '2018/3'
_chemical_name_systematic         ?
_chemical_name_common             ?
_chemical_melting_point           ?
_chemical_formula_moiety          ?
_chemical_formula_sum
 'C24 H28 Mn N4 O5' 
_chemical_formula_weight          507.44

loop_
 _atom_type_symbol
 _atom_type_description
 _atom_type_scat_dispersion_real
 _atom_type_scat_dispersion_imag
 _atom_type_scat_source
 'C'  'C'   0.0181   0.0091
 'International Tables Vol C Tables 4.2.6.8 and 6.1.1.4'
 'H'  'H'   0.0000   0.0000
 'International Tables Vol C Tables 4.2.6.8 and 6.1.1.4'
 'N'  'N'   0.0311   0.0180
 'International Tables Vol C Tables 4.2.6.8 and 6.1.1.4'
 'O'  'O'   0.0492   0.0322
 'International Tables Vol C Tables 4.2.6.8 and 6.1.1.4'
 'Mn'  'Mn'  -0.5299   2.8052
 'International Tables Vol C Tables 4.2.6.8 and 6.1.1.4'
 
_space_group_crystal_system       orthorhombic
_space_group_IT_number            60
_space_group_name_H-M_alt         'P b c n'
_space_group_name_Hall            '-P 2n 2ab'
 
_shelx_space_group_comment
;
The symmetry employed for this shelxl refinement is uniquely defined
by the following loop, which should always be used as a source of
symmetry information in preference to the above space-group names.
They are only intended as comments.
;
 
loop_
 _space_group_symop_operation_xyz
 'x, y, z'
 '-x+1/2, -y+1/2, z+1/2'
 '-x, y, -z+1/2'
 'x+1/2, -y+1/2, -z'
 '-x, -y, -z'
 'x-1/2, y-1/2, -z-1/2'
 'x, -y, z-1/2'
 '-x-1/2, y-1/2, z'
 
_cell_length_a                    19.2401(10)
_cell_length_b                    12.1579(7)
_cell_length_c                    10.1312(6)
_cell_angle_alpha                 90
_cell_angle_beta                  90
_cell_angle_gamma                 90
_cell_volume                      2369.9(2)
_cell_formula_units_Z             4
_cell_measurement_temperature     100(2)
_cell_measurement_reflns_used     9948
_cell_measurement_theta_min       4.36
_cell_measurement_theta_max       68.23
 
_exptl_crystal_description        BLOCK
_exptl_crystal_colour             YELLOW
_exptl_crystal_density_meas       ?
_exptl_crystal_density_method     ?
_exptl_crystal_density_diffrn     1.422          
_exptl_crystal_F_000              1060
_exptl_transmission_factor_min    ?
_exptl_transmission_factor_max    ?
_exptl_crystal_size_max           0.450
_exptl_crystal_size_mid           0.270
_exptl_crystal_size_min           0.250
_exptl_absorpt_coefficient_mu     4.893
_shelx_estimated_absorpt_T_min    0.217
_shelx_estimated_absorpt_T_max    0.374
_exptl_absorpt_correction_type    multi-scan
_exptl_absorpt_correction_T_min   0.2530
_exptl_absorpt_correction_T_max   0.7531
_exptl_absorpt_process_details    
;
SADABS-2016/2 (Bruker,2016/2) was used for absorption correction.
wR2(int) was 0.1497 before and 0.0836 after correction.
The Ratio of minimum to maximum transmission is 0.3359.
The \l/2 correction factor is Not present.
;
_exptl_absorpt_special_details    ?
_diffrn_ambient_temperature       100(2)
_diffrn_radiation_wavelength      1.54178
_diffrn_radiation_type            CuK\a
_diffrn_source                    ?
_diffrn_measurement_device_type   'Bruker D8 Venture'
_diffrn_measurement_method        '\f and \w scans'
_diffrn_detector_area_resol_mean  ?
_diffrn_reflns_number             19422
_diffrn_reflns_av_unetI/netI      0.0377
_diffrn_reflns_av_R_equivalents   0.0568
_diffrn_reflns_limit_h_min        -23
_diffrn_reflns_limit_h_max        23
_diffrn_reflns_limit_k_min        -14
_diffrn_reflns_limit_k_max        14
_diffrn_reflns_limit_l_min        -11
_diffrn_reflns_limit_l_max        12
_diffrn_reflns_theta_min          7.285
_diffrn_reflns_theta_max          68.225
_diffrn_reflns_theta_full         67.679
_diffrn_measured_fraction_theta_max   0.984
_diffrn_measured_fraction_theta_full  0.984
_diffrn_reflns_Laue_measured_fraction_max    0.984
_diffrn_reflns_Laue_measured_fraction_full   0.984
_diffrn_reflns_point_group_measured_fraction_max   0.984
_diffrn_reflns_point_group_measured_fraction_full  0.984
_reflns_number_total              2136
_reflns_number_gt                 2037
_reflns_threshold_expression      'I > 2\s(I)'
_reflns_Friedel_coverage          0.000
_reflns_Friedel_fraction_max      .
_reflns_Friedel_fraction_full     .
 
_reflns_special_details
;
 Reflections were merged by SHELXL according to the crystal
 class for the calculation of statistics and refinement.
 
 _reflns_Friedel_fraction is defined as the number of unique
 Friedel pairs measured divided by the number that would be
 possible theoretically, ignoring centric projections and
 systematic absences.
;
 
_computing_data_collection        ?
_computing_cell_refinement        ?
_computing_data_reduction         ?
_computing_structure_solution     ?
_computing_structure_refinement 'SHELXL-2018/3 (Sheldrick, 2018)'
_computing_molecular_graphics     ?
_computing_publication_material   ?
_refine_special_details           ?
_refine_ls_structure_factor_coef  Fsqd
_refine_ls_matrix_type            full
_refine_ls_weighting_scheme       calc
_refine_ls_weighting_details
'w=1/[\s^2^(Fo^2^)+(0.0659P)^2^+1.9849P] where P=(Fo^2^+2Fc^2^)/3'
_atom_sites_solution_primary      ?
_atom_sites_solution_secondary    ?
_atom_sites_solution_hydrogens    mixed
_refine_ls_hydrogen_treatment     constr
_refine_ls_extinction_method      'SHELXL-2018/3 (Sheldrick 2018)'
_refine_ls_extinction_coef        0.0087(7)
_refine_ls_extinction_expression
 'Fc^*^=kFc[1+0.001xFc^2^\l^3^/sin(2\q)]^-1/4^'
_refine_ls_number_reflns          2136
_refine_ls_number_parameters      161
_refine_ls_number_restraints      1
_refine_ls_R_factor_all           0.0434
_refine_ls_R_factor_gt            0.0414
_refine_ls_wR_factor_ref          0.1133
_refine_ls_wR_factor_gt           0.1109
_refine_ls_goodness_of_fit_ref    1.086
_refine_ls_restrained_S_all       1.086
_refine_ls_shift/su_max           0.000
_refine_ls_shift/su_mean          0.000
 
loop_
 _atom_site_label
 _atom_site_type_symbol
 _atom_site_fract_x
 _atom_site_fract_y
 _atom_site_fract_z
 _atom_site_U_iso_or_equiv
 _atom_site_adp_type
 _atom_site_occupancy
 _atom_site_site_symmetry_order  
 _atom_site_calc_flag
 _atom_site_refinement_flags_posn
 _atom_site_refinement_flags_adp
 _atom_site_refinement_flags_occupancy
 _atom_site_disorder_assembly
 _atom_site_disorder_group
Mn1 Mn 0.500000 0.66638(3) 0.250000 0.0092(2) Uani 1 2 d DS T P . .
O2 O 0.53327(7) 0.76940(12) 0.40197(13) 0.0172(4) Uani 1 1 d . . . . .
O3 O 0.53019(7) 0.61825(11) 0.52443(16) 0.0199(4) Uani 1 1 d . . . . .
O1 O 0.500000 0.49100(18) 0.250000 0.0227(5) Uani 1 2 d GS T P . .
H1B H 0.488752 0.447620 0.314877 0.034 Uiso 0.5 1 d DG U P . .
H1A H 0.503281 0.447722 0.181904 0.034 Uiso 0.5 1 d DG U P . .
N1 N 0.61067(8) 0.65499(13) 0.16079(16) 0.0136(4) Uani 1 1 d . . . . .
N2 N 0.61925(8) 0.57118(14) 0.07311(17) 0.0168(4) Uani 1 1 d . . . . .
H2 H 0.584915 0.530095 0.043743 0.020 Uiso 1 1 calc R U . . .
C1 C 0.54285(9) 0.71992(15) 0.50959(18) 0.0111(4) Uani 1 1 d . . . . .
C9 C 0.67484(9) 0.69615(16) 0.17763(19) 0.0123(4) Uani 1 1 d . . . . .
C2 C 0.57019(9) 0.78608(15) 0.62222(19) 0.0110(4) Uani 1 1 d . . . . .
C10 C 0.72320(10) 0.63771(17) 0.10176(19) 0.0156(4) Uani 1 1 d . . . . .
H10 H 0.771838 0.650475 0.096532 0.019 Uiso 1 1 calc R U . . .
C11 C 0.68586(10) 0.55800(17) 0.0363(2) 0.0178(4) Uani 1 1 d . . . . .
C7 C 0.56447(10) 0.90010(16) 0.6170(2) 0.0190(5) Uani 1 1 d . . . . .
H7 H 0.545191 0.934165 0.540987 0.023 Uiso 1 1 calc R U . . .
C8 C 0.68911(11) 0.79105(18) 0.2671(2) 0.0187(5) Uani 1 1 d . . . . .
H8B H 0.701779 0.855583 0.214379 0.028 Uiso 1 1 calc R U . . .
H8C H 0.727502 0.772397 0.326627 0.028 Uiso 1 1 calc R U . . .
H8A H 0.647432 0.807480 0.319102 0.028 Uiso 1 1 calc R U . . .
C3 C 0.59996(11) 0.7371(2) 0.7331(2) 0.0188(5) Uani 1 1 d . . . . .
H3 H 0.604640 0.659353 0.737525 0.023 Uiso 1 1 calc R U . . .
C12 C 0.70588(12) 0.4696(2) -0.0584(3) 0.0328(6) Uani 1 1 d . . . . .
H12B H 0.730468 0.411037 -0.011112 0.049 Uiso 1 1 calc R U . . .
H12C H 0.736337 0.500328 -0.126634 0.049 Uiso 1 1 calc R U . . .
H12A H 0.663999 0.439328 -0.099795 0.049 Uiso 1 1 calc R U . . .
C4 C 0.62274(11) 0.8022(3) 0.8372(2) 0.0303(6) Uani 1 1 d . . . . .
H4 H 0.643309 0.768971 0.912519 0.036 Uiso 1 1 calc R U . . .
C6 C 0.58660(12) 0.9642(2) 0.7216(3) 0.0347(6) Uani 1 1 d . . . . .
H6 H 0.581874 1.041926 0.717795 0.042 Uiso 1 1 calc R U . . .
C5 C 0.61557(11) 0.9152(2) 0.8315(3) 0.0366(7) Uani 1 1 d . . . . .
H5 H 0.630627 0.959347 0.903384 0.044 Uiso 1 1 calc R U . . .
 
loop_
 _atom_site_aniso_label
 _atom_site_aniso_U_11
 _atom_site_aniso_U_22
 _atom_site_aniso_U_33
 _atom_site_aniso_U_23
 _atom_site_aniso_U_13
 _atom_site_aniso_U_12
Mn1 0.0063(3) 0.0074(3) 0.0140(3) 0.000 0.00039(14) 0.000
O2 0.0154(7) 0.0234(7) 0.0129(7) 0.0001(5) -0.0008(5) -0.0033(6)
O3 0.0132(7) 0.0086(7) 0.0379(9) -0.0023(6) -0.0089(6) 0.0008(5)
O1 0.0264(12) 0.0085(10) 0.0332(14) 0.000 0.0158(9) 0.000
N1 0.0078(8) 0.0156(8) 0.0175(9) -0.0032(6) 0.0017(6) -0.0027(6)
N2 0.0094(8) 0.0208(9) 0.0201(9) -0.0083(7) 0.0036(6) -0.0070(6)
C1 0.0041(8) 0.0128(9) 0.0164(10) -0.0023(7) 0.0011(7) 0.0017(7)
C9 0.0104(9) 0.0120(9) 0.0146(9) 0.0032(7) -0.0013(7) -0.0032(7)
C2 0.0044(8) 0.0134(9) 0.0153(10) 0.0001(7) 0.0029(7) -0.0023(7)
C10 0.0072(8) 0.0192(9) 0.0203(10) 0.0016(8) 0.0024(7) -0.0029(7)
C11 0.0123(9) 0.0200(10) 0.0211(10) -0.0040(8) 0.0060(8) -0.0036(8)
C7 0.0115(9) 0.0140(9) 0.0315(12) -0.0030(8) -0.0023(8) -0.0001(7)
C8 0.0148(10) 0.0159(11) 0.0253(11) -0.0029(8) 0.0007(8) -0.0051(8)
C3 0.0111(10) 0.0269(12) 0.0185(10) 0.0072(8) -0.0015(7) -0.0082(9)
C12 0.0220(11) 0.0369(14) 0.0395(14) -0.0227(11) 0.0137(10) -0.0080(10)
C4 0.0113(10) 0.0646(17) 0.0149(11) 0.0002(11) -0.0002(8) -0.0128(11)
C6 0.0159(11) 0.0261(13) 0.0621(17) -0.0277(12) -0.0056(12) 0.0022(10)
C5 0.0124(10) 0.0608(18) 0.0367(14) -0.0346(13) 0.0006(10) -0.0057(10)
 
_geom_special_details
;
 All esds (except the esd in the dihedral angle between two l.s. planes)
 are estimated using the full covariance matrix.  The cell esds are taken
 into account individually in the estimation of esds in distances, angles
 and torsion angles; correlations between esds in cell parameters are only
 used when they are defined by crystal symmetry.  An approximate (isotropic)
 treatment of cell esds is used for estimating esds involving l.s. planes.
;
 
loop_
 _geom_bond_atom_site_label_1
 _geom_bond_atom_site_label_2
 _geom_bond_distance
 _geom_bond_site_symmetry_2
 _geom_bond_publ_flag
Mn1 O2 2.0854(14) 3_655 ?
Mn1 O2 2.0854(14) . ?
Mn1 O1 2.132(2) . ?
Mn1 N1 2.3173(16) 3_655 ?
Mn1 N1 2.3173(16) . ?
O2 C1 1.259(2) . ?
O3 C1 1.269(2) . ?
O1 H1B 0.8701 . ?
O1 H1A 0.8700 . ?
O1 H1B 0.87(2) 3_655 ?
O1 H1A 0.87(2) 3_655 ?
N1 C9 1.343(2) . ?
N1 N2 1.362(2) . ?
N2 C11 1.344(2) . ?
N2 H2 0.8800 . ?
C1 C2 1.492(3) . ?
C9 C10 1.400(3) . ?
C9 C8 1.493(3) . ?
C2 C7 1.392(3) . ?
C2 C3 1.395(3) . ?
C10 C11 1.377(3) . ?
C10 H10 0.9500 . ?
C11 C12 1.492(3) . ?
C7 C6 1.382(3) . ?
C7 H7 0.9500 . ?
C8 H8B 0.9800 . ?
C8 H8C 0.9800 . ?
C8 H8A 0.9800 . ?
C3 C4 1.390(3) . ?
C3 H3 0.9500 . ?
C12 H12B 0.9800 . ?
C12 H12C 0.9800 . ?
C12 H12A 0.9800 . ?
C4 C5 1.382(4) . ?
C4 H4 0.9500 . ?
C6 C5 1.380(4) . ?
C6 H6 0.9500 . ?
C5 H5 0.9500 . ?
 
loop_
 _geom_angle_atom_site_label_1
 _geom_angle_atom_site_label_2
 _geom_angle_atom_site_label_3
 _geom_angle
 _geom_angle_site_symmetry_1
 _geom_angle_site_symmetry_3
 _geom_angle_publ_flag
O2 Mn1 O2 106.18(8) 3_655 . ?
O2 Mn1 O1 126.91(4) 3_655 . ?
O2 Mn1 O1 126.91(4) . . ?
O2 Mn1 N1 92.39(5) 3_655 3_655 ?
O2 Mn1 N1 91.72(6) . 3_655 ?
O1 Mn1 N1 86.57(4) . 3_655 ?
O2 Mn1 N1 91.72(6) 3_655 . ?
O2 Mn1 N1 92.40(5) . . ?
O1 Mn1 N1 86.57(4) . . ?
N1 Mn1 N1 173.15(8) 3_655 . ?
C1 O2 Mn1 113.42(12) . . ?
Mn1 O1 H1B 127.3 . . ?
Mn1 O1 H1A 127.2 . . ?
H1B O1 H1A 104.5 . . ?
Mn1 O1 H1B 127.3(4) . 3_655 ?
H1B O1 H1B 105.4 . 3_655 ?
H1A O1 H1B 10.3 . 3_655 ?
Mn1 O1 H1A 127.2(5) . 3_655 ?
H1B O1 H1A 10.3 . 3_655 ?
H1A O1 H1A 105.6 . 3_655 ?
H1B O1 H1A 104.5 3_655 3_655 ?
C9 N1 N2 104.49(15) . . ?
C9 N1 Mn1 140.61(13) . . ?
N2 N1 Mn1 114.23(11) . . ?
C11 N2 N1 112.68(16) . . ?
C11 N2 H2 123.7 . . ?
N1 N2 H2 123.7 . . ?
O2 C1 O3 122.68(17) . . ?
O2 C1 C2 117.16(16) . . ?
O3 C1 C2 120.16(16) . . ?
N1 C9 C10 110.61(17) . . ?
N1 C9 C8 122.29(17) . . ?
C10 C9 C8 127.10(17) . . ?
C7 C2 C3 119.25(19) . . ?
C7 C2 C1 118.70(17) . . ?
C3 C2 C1 122.03(18) . . ?
C11 C10 C9 105.95(16) . . ?
C11 C10 H10 127.0 . . ?
C9 C10 H10 127.0 . . ?
N2 C11 C10 106.27(17) . . ?
N2 C11 C12 120.70(18) . . ?
C10 C11 C12 133.03(19) . . ?
C6 C7 C2 120.5(2) . . ?
C6 C7 H7 119.7 . . ?
C2 C7 H7 119.7 . . ?
C9 C8 H8B 109.5 . . ?
C9 C8 H8C 109.5 . . ?
H8B C8 H8C 109.5 . . ?
C9 C8 H8A 109.5 . . ?
H8B C8 H8A 109.5 . . ?
H8C C8 H8A 109.5 . . ?
C4 C3 C2 119.8(2) . . ?
C4 C3 H3 120.1 . . ?
C2 C3 H3 120.1 . . ?
C11 C12 H12B 109.5 . . ?
C11 C12 H12C 109.5 . . ?
H12B C12 H12C 109.5 . . ?
C11 C12 H12A 109.5 . . ?
H12B C12 H12A 109.5 . . ?
H12C C12 H12A 109.5 . . ?
C5 C4 C3 120.2(2) . . ?
C5 C4 H4 119.9 . . ?
C3 C4 H4 119.9 . . ?
C5 C6 C7 120.0(2) . . ?
C5 C6 H6 120.0 . . ?
C7 C6 H6 120.0 . . ?
C6 C5 C4 120.2(2) . . ?
C6 C5 H5 119.9 . . ?
C4 C5 H5 119.9 . . ?
 
loop_
 _geom_torsion_atom_site_label_1
 _geom_torsion_atom_site_label_2
 _geom_torsion_atom_site_label_3
 _geom_torsion_atom_site_label_4
 _geom_torsion
 _geom_torsion_site_symmetry_1
 _geom_torsion_site_symmetry_2
 _geom_torsion_site_symmetry_3
 _geom_torsion_site_symmetry_4
 _geom_torsion_publ_flag
C9 N1 N2 C11 0.7(2) . . . . ?
Mn1 N1 N2 C11 -171.93(14) . . . . ?
Mn1 O2 C1 O3 -3.1(2) . . . . ?
Mn1 O2 C1 C2 176.96(11) . . . . ?
N2 N1 C9 C10 -0.5(2) . . . . ?
Mn1 N1 C9 C10 168.88(15) . . . . ?
N2 N1 C9 C8 179.80(18) . . . . ?
Mn1 N1 C9 C8 -10.8(3) . . . . ?
O2 C1 C2 C7 18.6(2) . . . . ?
O3 C1 C2 C7 -161.32(17) . . . . ?
O2 C1 C2 C3 -162.64(17) . . . . ?
O3 C1 C2 C3 17.4(3) . . . . ?
N1 C9 C10 C11 0.1(2) . . . . ?
C8 C9 C10 C11 179.8(2) . . . . ?
N1 N2 C11 C10 -0.6(2) . . . . ?
N1 N2 C11 C12 179.4(2) . . . . ?
C9 C10 C11 N2 0.3(2) . . . . ?
C9 C10 C11 C12 -179.8(2) . . . . ?
C3 C2 C7 C6 -1.4(3) . . . . ?
C1 C2 C7 C6 177.40(19) . . . . ?
C7 C2 C3 C4 0.7(3) . . . . ?
C1 C2 C3 C4 -178.05(18) . . . . ?
C2 C3 C4 C5 0.4(3) . . . . ?
C2 C7 C6 C5 0.9(3) . . . . ?
C7 C6 C5 C4 0.2(4) . . . . ?
C3 C4 C5 C6 -0.9(3) . . . . ?
 
loop_
 _geom_hbond_atom_site_label_D 
 _geom_hbond_atom_site_label_H 
 _geom_hbond_atom_site_label_A 
 _geom_hbond_distance_DH 
 _geom_hbond_distance_HA 
 _geom_hbond_distance_DA 
 _geom_hbond_angle_DHA 
 _geom_hbond_site_symmetry_A 
 _geom_hbond_publ_flag
O1 H1B O3  0.87 1.85 2.7063(19) 167.4 5_666 yes
O1 H1A O3  0.87 1.86 2.7063(19) 164.1 7_565 yes
N2 H2 O3  0.88 2.10 2.913(2) 153.7 7_565 yes
N2 H2 O3  0.88 2.56 3.094(2) 120.3 3_655 yes
 
_refine_diff_density_max    0.454
_refine_diff_density_min   -0.490
_refine_diff_density_rms    0.074

_shelx_res_file
;
TITL 1_a.res in Pbcn
    shelx.res
    created by SHELXL-2018/3 at 16:17:43 on 06-Jul-2022
CELL  1.54178  19.2401  12.1579  10.1312   90.000   90.000   90.000
ZERR     4.00   0.0010   0.0007   0.0006    0.000    0.000    0.000
LATT   1
SYMM  1/2 - X, 1/2 - Y, 1/2 + Z
SYMM  - X,   Y, 1/2 - Z
SYMM  1/2 + X, 1/2 - Y, - Z
SFAC  C    H    N    O    MN
UNIT  96 112 16 20 4
MERG   2
OMIT     0   2   1
OMIT     5   1   1
OMIT     4   1   1
OMIT     1   1   0
OMIT     0   0   4
OMIT    20   0   2
OMIT     1   2   1
OMIT    12   0   2
EQIV $1 1-X,1-Y,1-Z
EQIV $2 +X,1-Y,-0.5+Z
EQIV $3 1-X,+Y,0.5-Z
SADI  MN1 H1B MN1 H1A
HTAB  O1 O3_$1
HTAB  O1 O3_$2
HTAB  N2 O3_$2
HTAB  N2 O3_$3
MORE -1
FMAP   2
PLAN    5
SIZE     0.250   0.270   0.450
ACTA
BOND
BOND   $H
CONF
LIST   4
L.S.  10
TEMP  -173.15
WGHT    0.065900    1.984900
EXTI    0.008720
FVAR       0.67846
MN1   5    0.500000    0.666380    0.250000    10.50000    0.00631    0.00741 =
         0.01397    0.00000    0.00039    0.00000
O2    4    0.533270    0.769398    0.401968    11.00000    0.01542    0.02343 =
         0.01287    0.00010   -0.00081   -0.00327
O3    4    0.530188    0.618245    0.524428    11.00000    0.01317    0.00856 =
         0.03786   -0.00231   -0.00890    0.00079
AFIX   6
O1    4    0.500000    0.491003    0.250000    10.50000    0.02638    0.00853 =
         0.03318    0.00000    0.01583    0.00000
H1B   2    0.488752    0.447620    0.314877    10.50000   -1.50000
H1A   2    0.503281    0.447722    0.181904    10.50000   -1.50000
AFIX   0
N1    3    0.610671    0.654992    0.160787    11.00000    0.00784    0.01558 =
         0.01750   -0.00321    0.00166   -0.00275
N2    3    0.619249    0.571175    0.073115    11.00000    0.00938    0.02081 =
         0.02012   -0.00834    0.00365   -0.00698
AFIX  43
H2    2    0.584915    0.530095    0.043743    11.00000   -1.20000
AFIX   0
C1    1    0.542854    0.719916    0.509593    11.00000    0.00415    0.01278 =
         0.01644   -0.00231    0.00115    0.00174
C9    1    0.674843    0.696148    0.177627    11.00000    0.01043    0.01200 =
         0.01462    0.00324   -0.00127   -0.00321
C2    1    0.570194    0.786084    0.622225    11.00000    0.00439    0.01336 =
         0.01527    0.00009    0.00290   -0.00235
C10   1    0.723203    0.637714    0.101761    11.00000    0.00717    0.01924 =
         0.02029    0.00162    0.00242   -0.00286
AFIX  43
H10   2    0.771838    0.650475    0.096532    11.00000   -1.20000
AFIX   0
C11   1    0.685860    0.558004    0.036311    11.00000    0.01225    0.02004 =
         0.02114   -0.00401    0.00597   -0.00360
C7    1    0.564469    0.900102    0.617023    11.00000    0.01149    0.01396 =
         0.03146   -0.00301   -0.00230   -0.00013
AFIX  43
H7    2    0.545191    0.934165    0.540987    11.00000   -1.20000
AFIX   0
C8    1    0.689115    0.791054    0.267121    11.00000    0.01480    0.01593 =
         0.02534   -0.00286    0.00073   -0.00510
AFIX 137
H8B   2    0.701779    0.855583    0.214379    11.00000   -1.50000
H8C   2    0.727502    0.772397    0.326627    11.00000   -1.50000
H8A   2    0.647432    0.807480    0.319102    11.00000   -1.50000
AFIX   0
C3    1    0.599958    0.737054    0.733138    11.00000    0.01107    0.02694 =
         0.01846    0.00724   -0.00148   -0.00819
AFIX  43
H3    2    0.604640    0.659353    0.737525    11.00000   -1.20000
AFIX   0
C12   1    0.705883    0.469592   -0.058433    11.00000    0.02203    0.03689 =
         0.03947   -0.02268    0.01368   -0.00800
AFIX 137
H12B  2    0.730468    0.411037   -0.011112    11.00000   -1.50000
H12C  2    0.736337    0.500328   -0.126634    11.00000   -1.50000
H12A  2    0.663999    0.439328   -0.099795    11.00000   -1.50000
AFIX   0
C4    1    0.622737    0.802216    0.837187    11.00000    0.01134    0.06461 =
         0.01491    0.00024   -0.00021   -0.01277
AFIX  43
H4    2    0.643309    0.768971    0.912519    11.00000   -1.20000
AFIX   0
C6    1    0.586602    0.964211    0.721581    11.00000    0.01585    0.02613 =
         0.06215   -0.02773   -0.00557    0.00217
AFIX  43
H6    2    0.581874    1.041926    0.717795    11.00000   -1.20000
AFIX   0
C5    1    0.615567    0.915243    0.831456    11.00000    0.01240    0.06084 =
         0.03666   -0.03463    0.00058   -0.00565
AFIX  43
H5    2    0.630627    0.959347    0.903384    11.00000   -1.20000
AFIX   0
HKLF    4


REM  1_a.res in Pbcn
REM wR2 = 0.1133, GooF = S = 1.086, Restrained GooF = 1.086 for all data
REM R1 = 0.0414 for 2037 Fo > 4sig(Fo) and 0.0434 for all 2136 data
REM 161 parameters refined using 1 restraints

END

WGHT      0.0659      1.9506

REM Highest difference peak  0.454,  deepest hole -0.490,  1-sigma level  0.074
Q1    1   0.5677  0.6192  0.2479  11.00000  0.05    0.45
Q2    1   0.5728  0.7041  0.2497  11.00000  0.05    0.38
Q3    1   0.6803  0.3984 -0.0394  11.00000  0.05    0.35
Q4    1   0.5000  0.6182  0.1785  11.00000  0.05    0.33
Q5    1   0.7012  0.6798  0.1211  11.00000  0.05    0.30
;
_shelx_res_checksum   44093

_shelx_hkl_file
;
   0   0   1    3.10    0.70
   0   0  -2 2878.91  177.68
   0   0   3   -0.30    1.40
   0   0   3    1.90    1.70
   0   0  -4  470.35   30.40
   0   0   5   -0.90    2.80
   0   0   5    3.40    2.90
   0   0  -6 2451.25  150.18
   0   0  -7   -4.80    3.90
   0   0   7    5.80    5.10
   0   0   7   -0.40    4.70
   0   0  -7    1.10    3.00
   0   0  -7    6.20    3.80
   0   0  -8 1796.82  106.99
   0   0   8 1671.93  109.29
   0   0   8 1695.53  110.09
   0   0  -9   -5.50    4.40
   0   0   9   -6.30    6.70
   0   0   9   -7.00    6.90
   0   0   9   -4.40    5.30
   0   0  10  647.84   43.70
   0   0 -10  673.43   41.90
   0   0 -10  655.53   42.30
   0  -1   0    0.40    0.50
   0   1   0    0.20    0.30
   0   1   1    1.00    0.70
   0  -1   1    2.00    0.40
   0   1   1    0.90    0.70
   0   1   2    0.90    1.40
   0   1   2    0.80    0.90
   0  -1  -2    1.30    1.20
   0  -1   2    2.10    0.80
   0   1   2    0.20    1.00
   0   1  -2    0.70    0.70
   0  -1   2    0.10    1.20
   0  -1  -4    0.70    1.80
   0   1   4   -0.30    2.20
   0   1  -4    2.50    1.70
   0  -1   4    0.40    2.00
   0   1   4    0.90    2.20
   0   1   4   -0.80    2.30
   0   1  -5   -0.50    2.30
   0  -1   5    0.60    2.70
   0   1   5    0.50    2.80
   0   1   5   -0.20    3.20
   0  -1   6    0.90    3.60
   0   1   6    0.90    4.00
   0   1   6    6.30    4.10
   0  -1  -6    1.10    3.40
   0  -1   7   12.40    5.80
   0   1  -7   13.70    4.30
   0   1   7    8.30    3.60
   0  -1  -7   -1.30    4.00
   0  -1  -7    4.50    3.30
   0   1  -7    7.60    3.30
   0   1   7    0.60    5.00
   0   1  -7    7.30    4.30
   0  -1   7    4.70    5.20
   0   1   7    4.50    3.50
   0   1   8   -1.70    6.40
   0  -1   8    1.40    4.20
   0  -1  -8   -1.80    4.10
   0  -1   8    1.00    6.40
   0   1   8    3.30    4.80
   0   1   8    2.80    6.30
   0  -1  -8   -9.90    5.00
   0  -1   8    5.50    4.60
   0   1  -8    8.80    5.40
   0   1  -8   -2.90    4.50
   0   1  -8   -0.80    3.60
   0  -1   8    0.80    5.60
   0   1   9   -4.40    5.30
   0   1  -9   -0.10    4.00
   0  -1   9    6.10    6.40
   0  -1   9   13.40    5.80
   0   1   9   -0.90    5.80
   0  -1   9   -2.20    6.70
   0   1   9   -8.40    6.40
   0  -1  -9    0.10    4.80
   0   1  -9   13.90    7.00
   0   1 -10    0.70    3.50
   0  -1 -10    1.60    6.10
   0  -1 -10   -3.30    4.60
   0  -1  10  -10.60    6.00
   0  -1  11   -7.50    5.90
   0  -1 -11   -4.40    3.20
   0  -1  12   -7.50    4.40
   0   1  12   -3.80    4.20
   0   2   0 3950.00  241.78
   0   2  -1 7213.28  440.06
   0   2   2 4490.55  276.97
   0   2  -3 1258.37   76.89
   0  -2  -4  217.88   14.80
   0   2  -4  195.58   13.40
   0  -2  -4  192.98   13.80
   0   2   4  226.18   14.80
   0   2   4  209.68   14.90
   0  -2  -5  177.78   12.50
   0  -2  -5  179.78   13.40
   0   2   5  183.68   13.90
   0   2   5  187.78   13.70
   0  -2   5  164.78   13.60
   0   2  -5  165.48   12.00
   0  -2   6    7.10    4.20
   0   2   6   12.20    5.20
   0  -2   6   17.30    5.50
   0   2   6   17.30    5.40
   0  -2  -6   13.80    4.50
   0   2   7  474.35   32.20
   0   2   7  495.35   29.80
   0  -2   7  462.05   32.10
   0  -2   7  421.56   32.20
   0   2  -7  448.46   30.90
   0   2   7  442.26   31.60
   0  -2  -7  401.26   29.80
   0   2  -7  433.16   28.60
   0  -2  -7  453.55   29.40
   0  -2  -8 1431.66   98.29
   0  -2   8 1536.35   98.49
   0  -2   8 1659.73  101.39
   0  -2   8 1628.24  102.09
   0   2   8 1513.05  100.49
   0   2   8 1492.65  100.69
   0   2  -8 1636.04   97.39
   0  -2   8 1727.53   99.39
   0  -2   9  166.08   16.20
   0   2   9  150.98   17.20
   0  -2   9  175.78   14.80
   0   2  -9  183.98   17.40
   0   2  -9  178.18   12.50
   0   2  -9  175.68   12.30
   0   2   9  146.29   14.70
   0  -2   9  137.59   17.50
   0  -2  -9  178.48   14.40
   0  -2  -9  151.08   15.30
   0   2   9  129.89   16.50
   0  -2  10   25.50    7.40
   0   2  10   24.60    6.70
   0  -2 -10   19.70    5.70
   0  -2  12  707.43   45.10
   0  -3   0    1.90    1.20
   0   3   0    4.20    1.10
   0   3  -1    1.40    0.90
   0  -3   1    2.70    1.00
   0   3   1    0.30    1.20
   0  -3  -1    0.80    1.50
   0  -3   2    1.00    1.10
   0   3   2   -0.80    1.40
   0  -3  -2    2.00    1.50
   0   3  -2    2.20    1.10
   0   3   2   -0.60    1.60
   0  -3  -2    1.30    1.80
   0   3   3   -0.40    2.10
   0  -3   3    0.70    2.10
   0  -3  -3    1.40    2.40
   0  -3   3    4.10    1.40
   0   3   4    0.80    3.00
   0   3   4    3.20    2.90
   0  -3  -4    2.70    3.20
   0  -3  -4   -0.40    2.50
   0  -3   4   -3.30    3.60
   0  -3   4    0.40    3.00
   0   3  -4    0.90    1.80
   0  -3  -5   -3.20    3.00
   0   3  -5   -1.00    2.20
   0  -3   5    2.50    4.80
   0   3   5    3.10    4.20
   0   3   5    1.70    3.50
   0  -3   5    2.30    3.50
   0  -3  -5    2.90    3.20
   0  -3   6    2.00    4.10
   0   3  -6    6.20    4.00
   0  -3   6   13.50    5.80
   0   3   6    0.80    5.20
   0  -3  -6    1.80    4.00
   0   3  -6    1.10    2.80
   0   3  -7   -4.60    3.00
   0  -3  -7    3.00    3.90
   0   3   7    7.30    4.00
   0  -3  -7   -7.80    7.90
   0   3   7    9.80    6.20
   0  -3   7   -4.50    5.40
   0   3  -7   -0.40    3.20
   0   3  -7    6.60    5.60
   0   3  -7    4.50    2.60
   0   3   7   -2.60    5.80
   0  -3   7   -0.30    4.80
   0   3  -8    4.10    6.90
   0   3  -8    0.50    3.30
   0   3   8    6.60    7.00
   0  -3  -8   -4.90    5.80
   0   3  -8    3.30    3.00
   0   3   8   -2.50    4.40
   0   3  -8    1.60    3.30
   0  -3  -8   -4.20    4.80
   0  -3   8    4.00    6.60
   0   3  -9    1.50    7.60
   0  -3  -9   -3.10    5.30
   0   3   9   -1.20    6.40
   0  -3  -9   -7.20    6.60
   0  -3   9    2.40    5.30
   0  -3   9   -4.30    5.60
   0   3   9    5.70    6.60
   0   3  -9    0.70    2.20
   0  -3   9   -7.90    6.20
   0   3   9   -9.30    5.30
   0  -3  10   10.30    5.80
   0   3 -10    0.30    8.00
   0   3  10   -5.80    5.10
   0  -3 -10    6.30    7.10
   0  -3 -10   -8.60    5.00
   0  -3  10   -4.70    5.90
   0  -3 -11   -1.00    5.00
   0  -3  11   -8.30    5.10
   0   3  11   -4.50    4.50
   0   4   1  194.48   14.00
   0   4   1  220.18   14.10
   0  -4  -1  228.48   14.10
   0   4  -1  217.48   14.00
   0   4  -2  499.15   30.90
   0   4  -3 2952.10  179.68
   0   4  -4   61.99    5.20
   0  -4  -4   78.19    8.10
   0   4   4   73.89    7.30
   0  -4   4   61.29    8.90
   0  -4   4   56.19    8.70
   0  -4  -4   69.19    6.40
   0   4   4   74.89    7.90
   0  -4  -5 1987.90  118.39
   0  -4  -5 1786.32  116.49
   0  -4   5 1909.01  119.69
   0   4   6  469.95   33.10
   0  -4  -6  508.35   31.90
   0   4   6  515.05   33.70
   0   4  -6  484.65   30.20
   0  -4   6  430.56   34.30
   0  -4  -6  447.36   31.10
   0  -4  -6  503.65   31.10
   0  -4  -7  235.28   17.70
   0   4   7  205.08   18.90
   0   4  -7  226.48   15.00
   0  -4   7  248.48   21.60
   0   4   7  227.98   19.90
   0   4   7  218.98   16.80
   0   4  -7  242.88   20.80
   0  -4  -7  217.08   16.80
   0  -4  -7  250.87   16.10
   0   4  -7  231.58   15.00
   0   4   8   24.00    8.60
   0  -4  -8   33.60    8.00
   0   4   8   24.40    5.80
   0  -4   8   21.50    8.60
   0  -4  -8   18.50    5.90
   0   4  -8   26.10    9.30
   0  -4  -9  427.36   29.80
   0   4   9  461.95   33.70
   0   4   9  408.36   37.60
   0  -4   9  510.05   33.30
   0  -4  -9  387.76   30.70
   0  -4   9  409.76   30.40
   0  -4   9  436.06   37.40
   0   4   9  461.95   29.50
   0  -4  10  178.08   17.60
   0  -4  10  184.88   15.50
   0   4 -10  200.48   20.30
   0  -4 -10  166.58   14.90
   0   4  10  185.58   14.70
   0  -4 -11  454.95   30.70
   0  -4  11  496.25   32.20
   0  -5   0    1.30    2.30
   0   5   1    1.60    1.80
   0   5  -1    4.70    1.80
   0  -5  -1    2.00    2.60
   0  -5   1    2.80    2.10
   0  -5  -2    1.60    2.20
   0  -5   2    4.10    2.20
   0   5  -2    1.30    1.50
   0  -5  -2    0.50    3.10
   0   5   2   -0.80    1.80
   0   5   2   -1.00    2.30
   0   5  -3    3.40    1.70
   0   5   3   -2.70    3.00
   0  -5  -3    0.20    3.60
   0  -5  -3   -0.70    2.70
   0   5  -4    0.60    1.70
   0  -5  -4   -0.70    4.20
   0  -5  -4    3.30    3.30
   0   5   4    3.10    3.40
   0   5   4    1.90    4.00
   0  -5   4   -5.70    3.70
   0  -5   4    2.50    4.40
   0  -5  -5    5.10    3.80
   0   5   5    7.80    2.80
   0   5   5   -1.00    4.00
   0   5  -5    6.20    5.10
   0   5   5    0.60    4.90
   0  -5  -5   -3.50    4.60
   0  -5  -5    0.80    3.80
   0  -5  -6   -1.80    3.90
   0   5  -6    3.80    1.40
   0  -5  -6    1.50    4.60
   0   5   6   -4.60    5.80
   0   5   6   -1.00    3.40
   0  -5   6   -7.20    7.60
   0  -5  -6    3.30    3.60
   0   5  -6    1.10    6.60
   0   5   6    8.80    5.50
   0   5   7    5.80    6.10
   0   5   7   -1.40    6.90
   0  -5   7   -6.80    7.40
   0  -5  -7   -2.10    6.10
   0  -5  -7   -2.60    4.00
   0  -5  -7   -2.10    4.50
   0   5   8   11.60    6.80
   0  -5  -8   -2.30    5.40
   0   5   8   -6.40    4.80
   0   5  -8    0.70    8.90
   0   5   8    2.40    7.60
   0  -5   8   -2.70    7.00
   0  -5   9   -2.50    5.60
   0  -5  -9    0.70    7.20
   0   5   9   -8.60    4.50
   0   5  -9   -3.60    9.50
   0  -5  -9   -5.10    5.60
   0  -5   9    0.90    6.20
   0  -5   9    1.00    4.80
   0  -5  10   -4.30    6.00
   0  -5 -10   -3.30    4.90
   0   5 -10  -13.50    7.60
   0  -5  10    7.80    4.80
   0   5  10   -5.00    3.80
   0   5  11   -3.20    2.30
   0  -5  11   -0.10    3.80
   0  -5 -11   -6.90    3.50
   0  -6   0   60.19    6.60
   0  -6  -1   26.00    5.00
   0   6  -2 5503.65  368.46
   0  -6  -2 6627.24  369.46
   0  -6  -3  430.16   26.40
   0   6  -3  364.76   25.00
   0   6   3  397.06   26.60
   0   6   3  366.96   26.40
   0  -6  -3  455.35   28.40
   0   6   4  992.30   64.59
   0   6  -4  978.80   62.49
   0  -6   4  890.11   71.39
   0  -6  -4 1123.39   64.39
   0  -6   4 1092.09   66.49
   0   6   5   75.89    7.40
   0  -6  -5   90.29   11.90
   0  -6   5   66.39   13.80
   0   6  -5   87.69    6.40
   0   6  -5   93.59   13.70
   0  -6  -5   87.79    9.30
   0   6   5   72.99   10.80
   0  -6  -5   90.69    9.30
   0   6  -5   93.39    7.90
   0   6  -6  213.78   20.90
   0  -6   6  244.48   24.80
   0  -6  -6  195.78   15.60
   0  -6  -6  203.48   14.90
   0   6   6  182.98   14.40
   0   6   6  195.58   17.90
   0  -6  -6  195.48   16.30
   0  -6  -6  216.18   15.50
   0  -6  -7 1706.03  107.89
   0  -6   7 1802.12  113.09
   0   6   7 1667.03  108.89
   0  -6   8  330.57   28.60
   0   6   8  361.76   23.30
   0  -6  -8  331.47   25.50
   0   6   8  392.86   30.00
   0  -6  -8  308.87   23.90
   0   6  -8  350.06   30.40
   0   6   9   14.50    4.30
   0   6  -9    7.90    9.90
   0  -6   9    5.40    6.50
   0  -6  -9    7.30    5.60
   0  -6  10  763.82   50.79
   0   6 -10  804.92   52.59
   0  -6  11    7.70    2.90
   0  -6 -11    3.50    3.30
   0  -7   0    1.90    3.70
   0  -7  -1    3.60    4.20
   0  -7   1    3.50    3.50
   0  -7   2    1.50    3.40
   0  -7  -2   -2.00    4.40
   0   7   2   -1.70    2.80
   0   7  -3    1.80    2.80
   0  -7  -3    6.20    6.10
   0  -7  -3    4.30    5.70
   0   7  -3    2.40    4.70
   0  -7   3    6.40    3.80
   0   7   3   -0.30    3.90
   0   7   4   -4.20    4.50
   0  -7  -4    1.90    4.40
   0  -7  -4   -9.30    5.50
   0   7  -4   -0.10    1.90
   0  -7   4    0.90    4.90
   0  -7  -4    2.90    5.30
   0   7  -4    4.40    6.20
   0   7  -4   -0.10    3.10
   0   7  -5    3.00    7.80
   0  -7  -5   -5.20    6.10
   0  -7  -5    5.70    5.10
   0   7  -5   -0.80    3.20
   0  -7  -5    7.30    3.80
   0  -7   5    4.00    8.20
   0   7   5   -0.40    2.40
   0   7   5   -9.20    5.20
   0  -7   6   -5.10    9.70
   0   7  -6   -1.00    8.70
   0  -7  -6   -3.40    5.60
   0  -7  -6   -6.60    4.00
   0  -7  -6    1.80    4.00
   0   7   6   -7.20    7.60
   0  -7  -6   -0.40    7.50
   0  -7  -7    3.10    4.70
   0  -7  -7   -3.00    5.40
   0   7   7   -1.20    3.50
   0   7   7   -5.20    6.70
   0  -7   7   -0.40    8.10
   0   7  -7  -12.50    9.90
   0  -7  -8    1.90    5.00
   0   7   8   -1.20    3.30
   0  -7  -8    5.30   14.80
   0  -7   8    2.70    6.20
   0   7  -8  -10.10    9.00
   0  -7  -9   -0.60    5.00
   0  -7   9   -5.70    5.20
   0   7  -9   -2.90    8.10
   0   7 -10   -2.30    5.90
   0  -7 -10   -0.40    3.80
   0  -8   0  248.48   18.90
   0   8   0  236.28   16.40
   0   8   1 2061.79  134.49
   0  -8  -2  633.94   42.50
   0  -8   2  673.63   43.90
   0  -8  -2  689.23   45.20
   0   8  -2  602.94   44.20
   0   8   2  733.83   41.50
   0  -8  -3  894.71   56.29
   0   8  -3  805.62   58.09
   0   8  -3  990.20   55.89
   0  -8   3  856.71   57.59
   0  -8  -3  898.31   59.09
   0   8   4  106.49   10.50
   0   8  -4  106.69    9.40
   0  -8  -4   87.79   12.80
   0   8  -4   97.09    6.40
   0  -8   4   88.29   12.30
   0   8  -4  107.89   14.90
   0  -8  -5 2590.84  149.39
   0  -8   5 2169.68  154.28
   0  -8  -5 2492.15  153.58
   0  -8  -6   24.00    5.30
   0  -8   6   15.50   10.40
   0  -8  -6   19.60    5.40
   0  -8  -6   20.40    6.60
   0   8  -6   28.70   10.60
   0   8   6   25.40    7.10
   0  -8   7  469.05   42.00
   0  -8  -7  428.26   28.80
   0   8   7  448.36   30.40
   0   8  -7  387.46   34.20
   0  -8  -7  413.96   28.80
   0  -8  -8  215.68   16.00
   0   8  -8  177.68   20.70
   0  -8   9  244.98   19.30
   0   8  -9  276.97   22.20
   0  -8  10  359.96   25.50
   0  -8 -10  419.66   25.10
   0   8 -10  379.56   26.30
   0  -9   0    4.70    5.90
   0   9   0    8.40    3.90
   0  -9   1   11.60    5.60
   0  -9  -1    2.20    6.10
   0  -9   1    4.90    5.40
   0   9   1    4.30    3.30
   0  -9  -1    6.40    4.20
   0   9  -1    0.40    3.80
   0  -9  -2    2.80    4.60
   0   9  -2   11.70    5.90
   0  -9   2    9.10    5.20
   0   9  -2    0.80    3.90
   0  -9  -2    8.80    7.10
   0   9   2    4.10    3.00
   0  -9   3    2.20    5.40
   0   9  -3    1.20    4.00
   0   9   3    1.70    2.60
   0  -9  -3    4.10    7.10
   0   9  -3   -2.70    6.20
   0  -9  -3   -0.10    5.40
   0   9  -4   -0.90    4.20
   0  -9  -4   -2.10    5.60
   0  -9  -4   -2.10    7.10
   0   9   4    3.20    3.70
   0   9  -4   -8.50    7.00
   0  -9  -5    1.50    7.70
   0  -9   5   -2.70    7.00
   0  -9  -5   -4.20    6.20
   0   9   5    1.80    4.50
   0   9  -5   -2.10    8.40
   0  -9  -5    1.10    5.00
   0   9  -6  -10.30    8.50
   0  -9  -6    7.70    4.60
   0   9   6   -5.60    4.40
   0  -9  -6   -1.50    6.20
   0  -9  -6   -0.80    4.70
   0   9  -7   -9.80    7.90
   0  -9  -7    2.80    4.70
   0  -9   8   -5.40    4.10
   0   9  -8   -6.00    6.30
   0  -9   9    2.80    2.80
   0   9  -9   -8.30    4.70
   0  -9  -9    1.10    3.20
   0 -10   0  103.49   10.40
   0  10   0  101.99    9.80
   0 -10   0   95.19   13.20
   0 -10   1 1988.40  120.79
   0 -10   1 1840.42  117.79
   0 -10   1 1808.12  117.69
   0 -10  -1 2018.10  121.29
   0 -10  -2   55.49    7.90
   0  10  -2   63.59    8.20
   0 -10   2   62.29    9.80
   0 -10   2   48.70    9.50
   0  10   2   57.89    6.90
   0  10  -2   62.49    9.80
   0 -10   3  395.36   32.80
   0  10  -3  517.55   30.40
   0 -10  -3  489.35   31.20
   0  10  -3  454.85   33.40
   0  10   3  421.56   29.30
   0 -10  -3  467.15   34.90
   0 -10   4  213.48   21.50
   0  10  -4  268.07   18.00
   0  10  -4  249.18   22.30
   0 -10  -4  247.88   18.90
   0 -10  -4  209.18   22.40
   0 -10  -4  276.27   19.60
   0 -10   5 1427.66   94.59
   0 -10  -6  568.44   36.00
   0 -10  -6  568.64   36.70
   0  10  -6  551.74   39.90
   0 -10  -6  547.25   36.30
   0  10  -7   41.00    8.70
   0 -10  -7   63.49    8.10
   0  10  -8    2.10    5.20
   0 -10   8   10.60    3.50
   0 -10  -8   13.50    3.80
   0 -11   0    3.10    5.10
   0  11   0    8.90    4.50
   0 -11   0    3.90    6.60
   0 -11   0    0.40    4.30
   0 -11   1    4.40    6.40
   0  11  -1    7.40    4.60
   0  11   1    4.10    3.90
   0 -11  -1    4.80    4.80
   0  11  -1   12.20    7.00
   0 -11  -1   13.50    7.60
   0 -11   1    5.40    4.70
   0 -11   1   11.40    4.30
   0 -11  -1    5.00    5.40
   0 -11  -2    5.70    7.80
   0  11  -2    0.80    6.70
   0 -11   2    5.60    4.10
   0 -11  -2    2.20    5.60
   0  11  -2    9.30    5.00
   0 -11  -2    4.70    4.70
   0 -11   2    5.60    4.30
   0  11   2   -2.30    3.50
   0 -11   2    9.30    6.60
   0  11  -3   -8.10    7.20
   0 -11   3    1.00    3.60
   0  11  -3    2.00    4.20
   0 -11  -3    3.10    6.20
   0 -11   3    0.90    8.00
   0 -11   3    1.40    4.10
   0 -11  -3   -3.40    4.60
   0  11   3   -1.90    2.80
   0 -11   4   -1.60    3.40
   0 -11  -4    3.80    6.20
   0  11  -4   -7.90    7.10
   0 -11  -4    0.90    4.70
   0 -11   5    2.60    4.40
   0  11  -5   -9.10    6.70
   0 -11  -5   -0.30    5.40
   0 -11  -5    1.20    4.50
   0 -11   6   -2.20    3.80
   0  11  -6   -4.40    5.90
   0 -11  -6    0.20    4.80
   0 -11  -7   -4.90    3.10
   0 -11  -7    1.10    3.40
   0  11  -7   -5.10    4.80
   0 -11  -8    0.30    2.50
   0  11  -8   -2.50    3.30
   0 -12   0   50.29    7.30
   0 -12   0   54.29    8.60
   0  12   0   56.29    7.60
   0  12   0   55.59    9.00
   0 -12   1   34.20    6.00
   0 -12  -1   32.20    6.40
   0  12  -1   31.10    5.40
   0 -12  -1   25.80    5.50
   0 -12   1   35.10    5.60
   0  12   1   27.80    4.70
   0  12  -1   42.10    8.60
   0 -12   2 1166.68   71.89
   0 -12   2 1134.59   71.79
   0  12  -3    8.80    7.50
   0 -12   3   18.60    5.10
   0 -12  -3   13.80    5.10
   0 -12  -3   16.00    5.90
   0 -12   3   18.70    4.40
   0 -12   4  132.49   11.30
   0 -12  -4  134.09   11.80
   0 -12   4  124.29   11.30
   0  12  -4  142.69   14.80
   0 -12  -4  134.69   12.20
   0  12  -5   68.59   12.00
   0 -12   5   86.59    8.80
   0 -12  -5   90.69    9.20
   0 -12   6  668.83   41.40
   0 -12  -6  637.54   40.90
   0  12  -6  657.83   42.70
   0 -13   0    5.00    4.40
   0  13   0    2.50    5.30
   0 -13   0    3.50    3.80
   0  13  -1    3.10    5.80
   0 -13   1    2.30    3.70
   0  13   1    4.10    5.50
   0 -13   1    4.50    4.60
   0 -13  -1    6.30    4.60
   0 -13  -1    7.40    4.20
   0 -13   2    4.90    4.20
   0 -13  -2    2.50    3.90
   0 -13  -2    6.90    4.90
   0 -13   2    3.00    5.20
   0  13  -2    4.00    5.90
   0  13   2   10.30    5.10
   0  13  -3   -2.40    5.20
   0 -13  -3    4.00    4.40
   0 -13   3   -2.60    3.50
   0 -13   3    6.20    3.40
   0 -13  -3    2.20    3.60
   0 -13  -4    1.50    3.00
   0 -13  -4    5.10    4.00
   0  13  -4   -6.80    4.50
   0 -13   4    0.90    2.90
   0  13  -5    1.90    3.90
   0 -13  -5    2.00    3.00
   0 -13   5   -1.10    2.50
   0 -14   0   80.09    7.80
   0 -14   0   79.39    8.00
   0  14   0   79.09    9.40
   0  14  -1  146.59   12.50
   0 -14  -1  134.99   10.80
   0 -14   1  136.59   10.80
   0 -14   1  132.79   10.60
   0 -14  -1  139.79   10.70
   0  14   1  140.09   11.90
   0 -14  -2  104.19    8.60
   0 -14   2  100.79    8.50
   0 -14   2   92.09    8.80
   0  14  -2  106.99   10.20
   0  14   2   96.69    9.40
   0 -14  -2   95.39    8.50
   0  14   3  210.98   14.80
   0 -14  -3  171.88   12.70
   0 -14   3  183.98   13.00
   0  14  -3  205.18   14.30
   0 -14  -3  190.08   13.00
   0 -14   3  171.88   12.90
  -1   0   0    0.20    0.30
  -1   0   0    0.60    0.30
   1   0   0    0.50    0.30
   1   0   0    0.50    0.30
  -1   0   1    2.00    0.50
   1   0   1    1.60    0.90
  -1   0   1    3.50    0.60
   1   0  -2 2387.46  144.09
  -1   0  -2 2271.67  144.79
  -1   0   3    0.10    1.20
  -1   0  -3    0.00    1.30
  -1   0   3    0.60    1.30
   1   0   3    1.90    1.80
   1   0   3    0.90    1.70
   1   0  -4  173.18   12.20
  -1   0   4  206.28   13.50
   1   0   4  208.18   14.10
  -1   0   4  197.28   13.50
   1   0  -5   -0.40    2.50
  -1   0   5    0.00    2.50
   1   0   5    2.80    3.30
   1   0  -5    1.60    2.10
  -1   0   5    1.10    2.70
   1   0   5    4.70    3.40
   1   0   6   12.90    5.00
   1   0   6   10.50    4.80
   1   0  -6   13.70    3.50
  -1   0   6   13.10    4.40
  -1   0   6   10.60    4.30
  -1   0   7    1.30    4.70
  -1   0  -7   -0.60    4.00
  -1   0  -7    0.60    3.90
  -1   0   7   -0.10    4.50
   1   0   7   -5.70    4.90
   1   0  -7   11.10    4.30
   1   0   7    2.10    5.50
   1   0  -7    3.50    3.70
   1   0   7    5.70    3.80
   1   0   7    4.90    4.00
  -1   0  -7    2.80    3.30
   1   0  -7    1.60    2.90
   1   0   8   15.80    5.30
  -1   0  -8    4.30    4.40
   1   0   8    4.20    4.60
   1   0   8   -0.20    6.30
   1   0  -8    7.30    3.90
   1   0   8    9.30    7.20
  -1   0   8   -3.00    5.40
  -1   0  -8   13.80    5.50
   1   0  -8   10.50    5.20
  -1   0   8   13.30    4.50
  -1   0   8   -0.20    5.30
  -1   0  -8   -2.20    5.20
   1   0  -8    2.10    4.70
  -1   0   9    0.40    6.10
  -1   0   9    0.80    6.30
  -1   0   9    1.50    5.00
  -1   0  -9   -4.50    4.70
   1   0  -9   -3.30    4.00
   1   0   9   -5.90    5.50
   1   0   9   -0.90    7.20
   1   0   9    2.90    7.60
   1   0 -10   48.00    7.10
   1   0  10   41.90    8.30
   1   0 -10   48.40    7.10
  -1   0  10   39.60    7.20
  -1   0 -10   51.69    6.80
  -1   0 -10   55.19    7.90
  -1   0 -11    1.10    3.40
  -1   0  11   -9.60    4.70
  -1   0  12  204.58   15.90
   1   0  12  236.48   17.20
  -1   1   0 1571.04   97.09
   1   1   2  792.32   50.39
   1  -1  -2  845.52   50.19
  -1  -1   3  649.34   39.10
   1   1   3  611.54   39.10
   1  -1  -3  661.33   38.80
   1   1  -3  589.64   38.50
   1   1  -4 3295.87  200.58
   1   1   5  875.51   56.79
   1  -1  -5  979.60   56.19
   1  -1   5  969.50   57.89
   1   1  -5  799.92   55.79
   1   1   6  448.56   30.90
   1  -1  -6  410.36   28.80
   1   1   6  476.05   30.90
  -1  -1   6  419.26   30.20
  -1  -1   6  478.75   30.30
   1   1  -6  424.06   28.50
  -1   1   6  440.56   30.50
   1  -1   6  431.36   31.00
  -1   1   6  516.35   30.60
   1   1   7 1285.17   80.89
   1   1   7 1288.57   80.59
  -1  -1   7 1318.47   80.69
   1  -1  -7 1272.27   78.29
  -1  -1  -7 1184.28   78.49
   1  -1   7 1286.57   81.29
   1  -1   7 1327.27   81.09
  -1   1   7 1319.27   78.29
  -1   1   7 1092.29   77.99
  -1   1   7 1229.58   79.89
   1   1  -7 1248.98   77.69
   1  -1  -8   89.99    9.10
  -1  -1   8   94.99    9.40
   1   1   8   93.69   10.90
  -1   1  -8  109.29   11.60
  -1  -1   8   85.69   11.70
  -1   1  -8   73.09    9.80
  -1   1  -8   82.89    9.00
   1  -1  -8   85.29    9.60
   1   1   8   90.39   12.80
  -1  -1   8   81.69   12.10
   1  -1   8  100.89   13.70
   1  -1   8   92.29   10.50
   1  -1   8   84.39   11.40
  -1  -1  -8   77.69    9.30
   1  -1   8  102.89   13.70
   1   1  -8   82.29   11.10
  -1   1   8   91.09    9.90
   1   1  -8   69.79    8.50
  -1   1   8   66.09   10.70
  -1  -1  -8   72.09   10.80
  -1   1   8   85.59   11.80
   1   1  -8   85.89    8.10
   1  -1  -9   66.29    9.00
  -1  -1   9   81.19   10.50
   1   1   9   52.19    8.60
  -1  -1   9   63.69   10.90
   1   1   9   81.69   12.70
  -1   1  -9   73.29   12.40
   1   1   9   68.19   11.80
  -1   1  -9   70.59    8.90
  -1   1   9   52.59   10.40
  -1   1   9   64.39    8.30
  -1   1   9   51.69   10.70
   1  -1   9   71.29   12.70
   1  -1   9   78.99    9.90
   1  -1   9   47.10   11.30
   1   1  -9   69.69    7.50
   1   1  -9   85.99   12.30
  -1  -1  -9   61.39    8.10
  -1  -1  10  435.36   29.70
   1  -1 -10  411.66   28.60
   1   1  10  420.36   29.80
  -1   1 -10  430.36   30.80
  -1   1 -10  444.86   27.70
   1  -1 -10  414.66   27.80
   1   1 -10  423.06   26.60
   1  -1  10  450.05   31.10
  -1  -1 -10  400.96   30.60
  -1   1  10  411.56   29.10
  -1  -1 -10  404.06   28.50
   1   1  11  813.72   49.50
   1  -1 -11  676.43   48.10
  -1  -1  11  759.82   49.30
   1  -1  11  834.52   50.49
  -1   1  11  804.52   48.90
  -1  -1 -11  706.93   47.70
   1   1  12  397.06   24.70
  -1  -1  12  352.06   24.30
   1  -1  12  360.26   25.10
  -1   1  12  345.67   24.10
  -1  -2   0    2.10    0.70
   1   2   0    1.20    0.40
   1  -2   0    0.70    0.80
  -1   2   0    0.30    0.80
  -1   2  -1 1312.07   75.99
   1   2  -1 1071.99   73.39
  -1   2  -2  107.49    7.10
   1   2   2  111.99    7.20
   1   2   2  104.59    7.70
   1  -2  -2   96.89    7.10
   1  -2  -2  108.19    7.70
  -1   2   2  108.99    7.70
   1  -2   2  106.19    7.70
   1  -2   2   98.89    7.70
  -1   2   2  111.79    7.60
   1  -2  -3  650.93   39.70
  -1  -2   3  714.13   40.20
   1   2   3  638.74   39.70
  -1   2  -3  638.14   39.50
   1  -2   3  585.04   40.70
   1   2  -3  612.24   39.20
  -1  -2   4   71.69    6.90
   1  -2  -4   77.69    6.50
   1   2   4   94.59    8.00
  -1   2  -4   73.39    6.20
  -1  -2   4   91.59    6.70
   1   2   4   79.99    7.50
   1  -2  -4   79.09    7.10
   1  -2   4  101.69    9.10
  -1   2   4   94.79    7.50
   1   2  -4   83.89    6.00
   1  -2   4   69.29    7.80
  -1  -2  -4   85.09    7.80
  -1   2   4   97.19    7.80
   1  -2  -5  502.45   32.30
   1   2   5  534.35   33.70
   1   2   5  519.15   33.80
  -1  -2   5  503.45   33.10
  -1  -2  -5  516.85   33.60
  -1   2   5  512.35   33.40
  -1   2   5  510.95   33.30
   1  -2   5  521.45   34.20
   1   2  -5  454.45   31.60
   1   2   6   57.19    8.20
  -1  -2   6   57.89    7.60
   1  -2  -6   56.79    6.40
  -1  -2   6   59.49    7.50
   1   2   6   61.39    8.30
   1  -2   6   63.39    9.00
  -1  -2  -6   68.69    6.90
   1   2  -6   49.80    5.60
  -1   2   6   55.79    8.20
   1  -2   6   66.79    9.40
  -1   2   6   61.19    8.10
   1   2  -6   55.19    5.40
   1   2   7   88.99    9.10
   1   2   7   72.69   10.30
  -1   2  -7   82.09    7.50
   1   2   7   78.79   10.60
   1  -2  -7   69.89    7.90
   1  -2  -7   63.69    8.40
  -1  -2   7   57.29    8.90
  -1  -2   7   66.59    9.60
  -1   2  -7   84.49   10.30
   1  -2   7   84.29   11.80
  -1   2   7   65.89    9.80
   1   2  -7   74.99    6.50
  -1   2   7   78.69    8.60
   1  -2   7   83.49   11.50
  -1  -2  -7   62.49    8.50
   1   2  -7   82.19   10.20
  -1   2   7   63.99    9.20
  -1  -2  -7   69.09    8.20
  -1  -2   8   30.60    5.80
  -1  -2   8   34.00    8.10
   1  -2  -8   30.40    6.90
   1   2   8   26.50    8.00
   1   2   8   25.30    8.60
  -1   2  -8   22.70    5.70
   1  -2   8   20.10    8.70
  -1   2   8   45.90    8.80
  -1   2   8   29.90    5.80
  -1  -2  -8   37.30    7.60
   1  -2   8   41.60    9.70
   1   2  -8   23.40    4.40
  -1   2   8   28.70    8.20
   1  -2   8   29.20    6.50
   1  -2   8   19.50    6.30
   1   2  -8   30.40    4.20
  -1  -2   9   41.90    7.10
  -1   2  -9   36.10    6.00
   1   2   9   26.70    9.00
   1   2   9   36.00   10.00
   1  -2  -9   27.50    5.90
   1  -2  -9   32.90    7.80
  -1   2  -9   43.40    8.90
  -1  -2   9   41.60    6.80
  -1  -2   9   29.90    8.30
  -1   2  -9   32.50    5.20
   1  -2   9   41.40    8.60
   1   2  -9   37.60    5.10
   1   2  -9   32.80    4.20
  -1  -2  -9   30.50    8.20
   1  -2   9   35.30    9.60
  -1   2   9   17.30    7.80
  -1   2   9   28.80    7.70
  -1  -2  -9   23.90    6.30
   1   2  -9   30.20    8.40
   1  -2   9   32.10    7.70
   1  -2   9   21.90    9.40
  -1   2   9   26.90    6.10
   1  -2 -10   14.10    5.10
   1   2  10    8.00    6.40
  -1   2 -10   21.80    3.40
  -1  -2  10   21.40    6.50
  -1   2  10    8.00    5.30
  -1  -2 -10   38.60   12.10
   1  -2  10   20.00    8.00
  -1  -2 -10   18.50    6.00
  -1  -2  11    3.40    5.50
   1   2  11    3.20    5.30
   1  -2 -11    3.50    3.40
  -1  -2 -11    2.40    4.20
   1  -2  11  -13.60    8.10
  -1   2  11    0.00    4.60
  -1  -2  12    8.20    4.20
   1   2  12    7.60    4.00
  -1   2  12    4.30    3.60
   1  -2  12   -3.00    4.60
   1   3   0 2773.92  157.68
  -1   3   0 2321.97  157.88
   1  -3  -1  415.36   27.00
   1   3  -1  444.66   26.50
  -1   3  -2 1217.78   84.59
   1  -3  -2 1532.15   84.89
  -1  -3  -2 1485.65   84.89
   1   3  -2 1304.47   84.19
  -1  -3   3   97.19    6.80
   1  -3  -3   97.19    7.70
   1   3   3   91.89    7.60
  -1   3  -3   79.29    6.40
  -1  -3   3   92.29    6.20
   1  -3  -3   81.99    6.60
   1   3   3   97.99    7.60
  -1   3   3   80.79    7.10
   1  -3   3   79.09    7.80
   1   3  -3   88.49    6.00
  -1  -3  -3   88.59    7.90
  -1  -3  -3   87.29    6.70
  -1   3  -4 4999.70  282.87
   1   3  -4 4299.57  282.37
   1  -3  -5   99.49    8.70
  -1   3  -5  110.79    9.60
  -1  -3   5  113.19    9.60
   1  -3  -5  100.29    9.50
   1   3   5  109.99   10.10
   1   3   5   93.89   10.20
   1  -3   5   86.59   10.50
  -1  -3  -5   85.69    8.70
  -1  -3  -5  105.79   10.20
   1  -3   5  119.29   12.50
  -1   3   5  104.29    9.50
  -1  -3   6   52.79    7.80
  -1   3  -6   46.10    7.50
  -1   3  -6   45.50    6.00
   1   3   6   59.49    6.60
  -1  -3   6   41.00    6.90
   1   3   6   52.69    8.30
  -1   3   6   50.79    7.90
  -1   3   6   57.39    8.00
  -1  -3  -6   38.20    6.40
   1   3  -6   44.70    4.80
   1   3  -6   50.89    7.70
   1  -3   6   62.69   14.20
   1  -3   6   46.50    8.70
   1   3  -6   52.29    4.80
  -1   3  -7   44.30    7.90
  -1   3  -7   41.50    5.90
   1  -3  -7   37.90    5.70
   1   3   7   48.80    6.30
  -1  -3   7   35.20    7.50
   1   3   7   30.90    8.30
   1  -3  -7   45.70    9.80
   1   3   7   50.99    9.10
  -1  -3  -7   36.80    7.60
  -1  -3  -7   37.10    5.80
  -1   3   7   49.10    8.30
   1   3  -7   35.40    4.60
   1  -3   7   39.50    9.60
  -1   3   7   50.89    7.20
   1   3  -7   44.70    4.50
  -1   3   7   37.80    7.60
   1   3  -7   39.70    4.70
   1  -3   7   39.00    9.00
   1   3  -7   47.20    8.00
   1  -3  -8  452.95   30.30
  -1   3  -8  495.65   33.40
  -1  -3   8  428.56   33.10
   1   3   8  416.56   33.30
   1  -3  -8  401.76   30.80
   1   3   8  478.95   30.70
  -1   3  -8  447.06   29.50
  -1   3  -8  497.85   29.40
  -1  -3  -8  429.76   31.40
   1   3  -8  457.05   32.80
  -1   3   8  492.35   30.30
   1  -3   8  463.45   32.80
   1  -3   8  479.05   37.30
  -1   3   8  441.36   32.80
   1  -3   8  429.16   35.30
   1  -3   8  443.26   31.70
  -1  -3  -8  435.86   30.40
  -1   3  -9   38.20    5.10
   1   3   9   25.60    7.00
   1  -3  -9   48.60    8.70
  -1   3  -9   31.60    9.60
  -1  -3   9   44.60    6.80
  -1   3  -9   42.70    5.20
   1  -3  -9   26.80    6.30
  -1  -3   9   38.30    6.90
  -1   3  -9   42.20    5.90
   1   3   9   44.50   10.20
  -1  -3   9   34.20    8.70
   1   3  -9   52.19   10.60
  -1   3   9   26.70    8.30
   1  -3   9   33.10    8.20
  -1  -3  -9   23.30    6.60
  -1   3   9   23.20    5.90
  -1  -3  -9   31.00    8.90
   1  -3   9   40.60    8.10
   1  -3   9   49.20   12.10
  -1   3   9   30.80    8.40
   1   3  10  345.07   23.10
  -1  -3  10  308.77   24.00
  -1  -3  10  314.97   23.20
  -1   3 -10  339.87   27.00
  -1  -3 -10  269.07   22.70
   1  -3  10  332.77   24.40
  -1   3  10  357.56   22.90
  -1  -3 -10  268.47   24.30
   1  -3  10  363.36   26.50
   1   3 -10  347.47   27.20
   1   3  11  104.49   11.30
  -1  -3  11   80.89   10.70
  -1  -3 -11   79.89   10.70
  -1   3  11  114.29    9.80
   1  -3  11   86.69   13.20
  -1   4   0    1.30    1.40
   1  -4   0   -0.30    1.60
  -1  -4   0    1.60    1.60
  -1  -4   1   20.80    2.60
  -1  -4   1   23.90    2.70
   1  -4  -1   26.30    3.10
   1   4   1   19.50    2.60
  -1   4  -1   18.50    2.70
   1  -4  -1   27.60    3.90
   1   4  -1   20.70    2.20
  -1  -4  -1   31.60    3.90
   1  -4   1   25.90    3.30
  -1   4   1   22.10    3.10
  -1   4   1   19.30    2.90
   1  -4  -2 1947.11  115.19
  -1   4  -2 1739.23  114.89
   1   4  -2 1934.91  114.49
  -1  -4  -2 1906.41  115.19
  -1   4  -3 1328.17   83.59
  -1  -4  -3 1455.95   84.09
   1   4  -3 1308.67   82.99
  -1  -4   4  406.96   29.60
   1  -4  -4  429.56   27.50
   1   4   4  423.86   28.40
   1  -4  -4  481.55   29.10
  -1  -4   4  397.66   27.10
  -1   4   4  493.35   28.70
  -1  -4  -4  396.56   27.50
   1   4  -4  378.96   26.20
  -1   4   4  453.65   28.30
  -1  -4   5   30.90    7.30
   1  -4  -5   17.10    4.10
  -1  -4   5   13.40    5.40
  -1   4  -5   11.40    3.10
   1  -4  -5   18.30    5.10
   1   4   5   15.50    4.90
   1   4   5    7.90    5.00
  -1  -4  -5   14.30    5.30
   1  -4   5    9.10    7.70
  -1  -4  -5   21.10    4.50
   1   4  -5   16.40    2.30
  -1   4   5   20.90    4.90
  -1   4   5   13.30    5.00
   1  -4   5   12.50    6.50
   1  -4  -6   63.39    6.70
   1  -4  -6   60.09    6.30
  -1   4  -6   49.99    6.00
  -1  -4   6   78.39   10.30
  -1   4  -6   67.49    6.10
   1   4   6   53.89    8.80
   1  -4  -6   49.70    7.30
  -1   4   6   50.79    8.20
   1   4  -6   51.39    4.20
  -1  -4  -6   57.09    6.40
   1   4  -6   56.19    4.30
   1  -4   6   41.40    9.50
  -1  -4  -6   55.49    7.20
   1  -4   6   85.19   13.70
  -1  -4  -6   61.59    7.60
  -1   4   6   77.99    9.30
   1   4   7    9.70    4.50
   1  -4  -7   14.00    4.60
  -1   4  -7   14.00    3.40
   1  -4  -7    7.50    5.50
  -1  -4   7    4.10    6.00
  -1   4  -7   18.00    7.70
  -1   4  -7   19.20    4.10
   1   4   7   14.80    6.90
   1   4   7    4.10    7.10
   1   4  -7   19.80    7.40
  -1   4   7   15.60    6.40
  -1  -4  -7   18.50    6.90
   1  -4   7    3.80    8.80
   1  -4   7    9.00   12.70
  -1   4   7   17.70    7.50
  -1  -4  -7   24.00    5.40
  -1  -4  -7   15.50    4.30
  -1   4   7   13.50    4.50
   1  -4  -8   33.10    6.30
   1   4   8   30.90    9.80
   1   4   8   31.60    6.30
  -1   4  -8   38.70    9.90
  -1   4  -8   39.00    5.10
  -1  -4   8   42.10    9.00
   1  -4  -8   28.00    7.80
  -1   4  -8   33.00    4.90
  -1   4  -8   36.90    4.60
   1  -4   8   28.70    9.60
  -1  -4  -8   32.50    6.40
  -1   4   8   33.50   13.00
   1  -4   8   26.90    8.50
   1   4  -8   40.10   10.00
  -1   4   8   38.20    6.00
  -1   4   8   27.60    8.90
   1  -4   8   36.30   11.30
  -1  -4  -8   34.40    8.10
   1  -4  -9    1.20    6.70
   1  -4  -9   -6.30    5.20
  -1   4  -9    7.30    9.40
  -1  -4   9   -1.90   10.10
   1   4   9    3.20    5.30
  -1  -4   9    9.50    5.30
   1   4   9   -9.80    7.00
   1   4   9   -1.40    8.10
   1  -4   9    1.80    6.20
  -1  -4  -9   -1.10    7.00
  -1  -4  -9    3.40    6.10
   1  -4   9    4.30   10.30
   1   4  -9   12.20    9.50
  -1   4   9    5.90   10.00
   1  -4   9   -8.30    7.20
  -1   4   9   -7.30    5.00
  -1   4   9   -2.80    7.50
  -1   4 -10   17.00    8.60
   1   4  10   15.00    5.40
  -1  -4  10   30.70    7.00
   1  -4 -10    6.60    5.20
  -1  -4  10   28.20    8.70
  -1  -4 -10    8.50    5.90
   1  -4  10   23.00    7.90
   1   4 -10   26.70    9.90
   1  -4  10   31.80    7.20
  -1   4  10   14.20    5.00
   1   4  11   27.70    4.40
  -1  -4  11   26.70    5.20
   1  -4 -11   24.20    4.50
   1  -4  11   23.80    6.70
  -1  -4 -11   20.30    4.90
   1  -5   0   38.90    4.90
  -1   5   0   35.40    3.90
  -1  -5   0   40.70    4.70
  -1   5  -1 3371.56  205.48
   1  -5  -2 2376.96  147.89
  -1  -5  -2 2568.04  148.09
   1   5  -2 2311.07  147.09
  -1   5  -3 6583.04  410.26
  -1  -5  -3 6917.11  410.86
   1  -5  -4  911.61   53.79
   1   5   4  831.22   54.39
  -1   5  -4  873.41   52.79
  -1  -5   4  818.92   55.29
   1  -5   4  771.92   55.99
  -1   5   4  821.32   54.19
   1   5  -4  842.32   51.99
  -1  -5  -4  939.41   53.89
   1  -5  -5  173.68   13.30
  -1   5  -5  165.58   11.90
  -1   5  -5  206.38   16.80
   1   5   5  147.59   14.80
   1  -5  -5  194.38   13.40
   1   5   5  187.48   14.60
   1  -5  -5  152.08   14.90
   1   5   5  164.88   12.20
  -1   5   5  165.88   14.10
   1   5  -5  179.58   15.40
  -1   5   5  157.08   12.10
  -1  -5  -5  178.28   16.00
  -1  -5  -5  190.08   13.90
   1  -5   5  135.49   17.80
  -1   5   5  165.28   14.70
  -1  -5  -5  171.28   13.10
   1  -5   5  210.08   21.10
   1  -5  -6   58.19    7.40
  -1   5  -6   74.89   11.30
   1   5   6   47.50    7.20
   1  -5  -6   54.09    7.90
   1  -5  -6   57.29    7.10
  -1  -5   6   81.79   12.30
   1  -5  -6   69.99    6.20
   1   5   6   41.20    8.00
  -1   5  -6   60.09    5.80
  -1   5  -6   56.79    5.90
   1   5   6   55.19    9.50
  -1  -5  -6   61.69    8.10
  -1  -5  -6   55.89    8.30
   1  -5   6   89.59   15.60
  -1  -5  -6   62.39    8.30
   1   5  -6   74.39   10.80
  -1   5   6   47.90    7.20
  -1   5   6   64.89    9.40
  -1   5   6   63.49    9.40
   1  -5  -7  595.54   35.20
  -1   5  -7  534.55   34.20
   1   5   7  585.44   39.20
  -1   5  -7  556.14   33.90
  -1   5  -7  576.24   33.90
   1  -5  -7  539.45   36.80
   1  -5  -7  526.85   36.00
  -1  -5   7  606.24   40.00
   1   5   7  470.75   38.00
  -1   5   7  528.55   38.00
  -1   5   7  555.04   38.60
  -1  -5  -7  504.25   36.90
  -1  -5  -7  549.65   36.20
  -1  -5  -7  555.74   35.70
   1  -5  -8  293.57   21.70
  -1  -5   8  285.47   24.50
   1   5   8  299.97   21.40
   1   5   8  302.67   25.50
   1   5   8  305.37   31.30
  -1  -5  -8  293.77   22.10
   1  -5   8  327.87   28.90
  -1   5   8  278.77   23.90
   1  -5   8  290.37   26.00
   1   5  -8  333.67   27.10
  -1   5   8  330.67   25.30
  -1   5   8  311.27   21.10
  -1  -5  -8  296.57   27.30
   1  -5  -9  790.22   54.09
  -1  -5   9  773.52   54.09
   1  -5  -9  792.32   52.89
  -1   5  -9  917.11   57.79
   1   5   9  880.31   52.49
   1  -5   9  794.32   54.49
  -1  -5  -9  814.62   53.09
   1  -5   9  792.12   58.29
   1  -5   9  897.61   56.49
  -1   5   9  879.51   52.39
  -1  -5  -9  771.22   55.19
   1   5  -9  856.31   57.09
  -1   5 -10  168.08   17.90
   1  -5 -10  151.48   13.40
  -1  -5  10  160.78   14.60
   1  -5  10  148.59   14.10
  -1  -5 -10  145.89   13.60
   1  -5 -11  478.75   31.20
   1  -5  11  485.05   32.60
  -1  -5 -11  500.85   31.50
  -1  -6   0    2.40    2.90
   1  -6   0    9.60    3.60
  -1  -6   1    2.80    2.60
   1   6   1    1.60    1.60
   1  -6  -1    0.40    3.10
  -1   6  -1    3.10    2.90
   1  -6  -1    1.80    3.30
  -1   6   1    5.20    2.50
   1  -6   1    7.00    3.30
  -1  -6  -1   -0.40    3.10
   1   6   2   50.59    5.80
  -1   6  -2   42.40    5.30
   1  -6  -2   50.39    7.30
   1  -6  -2   58.39    6.10
  -1  -6   2   59.69    5.90
  -1   6   2   55.19    6.20
   1  -6   2   59.39    6.40
  -1   6   2   48.10    5.70
  -1  -6  -2   67.39    7.90
   1   6   3    0.20    2.50
  -1   6  -3    1.60    2.40
   1   6   3   -0.90    3.50
  -1  -6   3    3.70    2.80
   1  -6  -3    7.10    3.60
   1  -6  -3    2.00    4.40
  -1   6   3    1.60    3.60
   1  -6   3    7.20    3.70
  -1  -6  -3    0.90    3.60
  -1  -6  -3   -0.40    4.30
  -1   6   3   -0.10    2.90
   1  -6  -4  707.43   41.70
  -1  -6   4  606.34   43.00
   1  -6  -4  701.23   43.70
  -1   6  -4  631.64   40.30
  -1  -6  -4  682.33   41.80
   1  -6   4  620.74   44.00
   1  -6   4  576.14   44.10
  -1   6   4  634.64   43.50
  -1  -6  -4  724.93   44.20
  -1   6   4  580.34   41.80
  -1   6  -5  339.77   25.80
  -1   6  -5  341.47   20.10
  -1  -6   5  320.37   27.40
   1   6   5  261.27   21.30
  -1   6  -5  296.57   19.50
   1  -6  -5  308.97   21.80
   1  -6  -5  303.67   20.60
   1   6   5  281.57   22.60
   1  -6  -5  318.47   21.00
   1  -6  -5  318.67   24.00
   1  -6   5  254.97   27.30
  -1  -6  -5  299.57   24.20
  -1  -6  -5  300.57   21.90
  -1   6   5  299.57   20.00
  -1  -6  -5  313.97   21.40
   1   6  -5  334.37   24.90
  -1   6   5  305.47   22.60
   1   6  -5  274.67   20.20
   1  -6  -6   89.69    8.50
   1   6   6   76.59    8.30
  -1   6  -6   98.39   16.50
   1  -6  -6   93.19   14.20
   1  -6  -6   91.29    9.70
  -1  -6   6  107.49   15.20
   1   6   6   66.19   10.40
  -1   6  -6   97.59    6.90
   1  -6  -6   88.09    9.10
  -1   6   6   86.49    8.60
   1  -6   6   81.79   17.40
  -1  -6  -6  107.89    9.90
  -1   6   6   70.69   10.40
  -1  -6  -6   84.19   10.40
  -1  -6  -6   90.09   10.70
   1   6  -6  105.29   15.40
   1  -6  -7   29.40    5.60
  -1  -6   7   42.90    9.70
   1  -6  -7   28.80    5.70
  -1   6  -7   25.70   10.90
   1  -6  -7   24.20    7.80
   1   6   7   25.50    9.00
   1   6   7   22.80    4.90
  -1  -6  -7   32.30    6.00
   1  -6   7   22.30   12.10
   1   6  -7   28.50   10.10
  -1  -6  -7   27.30    6.50
  -1   6   7   30.70    8.80
  -1  -6  -7   20.90    4.80
  -1  -6  -7   41.80    8.90
  -1   6   7   20.80    4.90
   1  -6  -8   10.90    7.10
  -1   6  -8   15.50   11.50
   1   6   8    5.50    8.80
   1   6   8    5.60    4.50
   1  -6  -8   15.40    5.50
  -1  -6   8   13.70    6.80
   1  -6   8    7.80    9.20
  -1  -6  -8    8.90    4.30
  -1  -6  -8   13.80    5.60
  -1  -6  -8   27.40    8.60
  -1   6   8   14.90    4.80
  -1   6   8   17.50   11.90
   1   6  -8    5.00    9.20
  -1   6  -9   -1.50   10.10
   1  -6  -9    3.00    5.50
   1   6   9    0.90    3.80
   1  -6   9   -3.20    7.20
   1  -6   9    3.70    6.10
   1   6  -9    1.40    9.20
  -1  -6  -9   -0.60    5.10
  -1   6   9   -4.30    4.00
  -1  -6  10   55.99    8.90
   1   6  10   50.89    5.10
  -1   6 -10   39.50    9.20
   1  -6 -10   55.49    8.40
   1  -6  10   41.50    7.40
  -1  -6 -10   55.69    8.40
   1   6 -10   62.59   10.60
  -1   6  10   61.49    6.20
   1  -6  10   46.20    7.00
  -1  -6  11   39.10    5.00
   1  -6 -11   28.90    4.20
  -1  -6 -11   37.10    5.70
   1  -6  11   23.50    4.40
   1   7   0 3865.71  241.28
   1   7   1 1606.04  106.39
   1   7  -1 1622.24  107.99
  -1   7   1 1626.14  106.89
  -1   7  -2 1317.77   81.39
  -1   7  -3  370.06   29.10
   1  -7  -3  442.36   27.30
  -1  -7   3  400.26   27.70
   1  -7  -3  414.86   29.50
   1  -7  -3  384.26   28.40
  -1   7  -3  466.45   26.90
   1   7   3  432.96   27.30
   1  -7   3  388.86   28.60
   1   7  -3  376.36   28.90
  -1  -7  -3  430.46   29.80
  -1   7  -4   55.89    5.50
  -1  -7   4   46.80    8.20
  -1   7  -4   47.20    9.50
   1   7   4   58.59    8.70
   1  -7  -4   55.09    9.80
   1  -7  -4   71.99    8.30
  -1   7  -4   64.59    6.90
   1  -7  -4   60.99    8.30
   1   7  -4   62.09    9.50
   1  -7   4   60.29    9.60
  -1  -7  -4   64.89    8.30
  -1  -7  -4   59.39   10.00
  -1   7   4   50.39    7.50
  -1   7   4   59.79    5.40
   1   7   5  699.93   47.20
   1  -7  -5  784.72   49.80
   1   7   5  718.73   49.90
   1  -7  -5  757.22   52.19
  -1   7  -5  796.22   53.09
   1  -7  -5  807.02   48.60
   1  -7  -5  792.62   48.90
  -1  -7   5  715.93   54.09
   1  -7  -5  733.43   48.50
  -1   7  -5  786.62   47.30
   1   7  -5  771.02   52.39
   1   7  -5  795.82   48.30
  -1  -7  -5  809.12   49.30
  -1   7   5  722.73   49.80
  -1   7   5  790.52   47.60
  -1  -7  -5  739.83   52.29
   1  -7  -6  393.06   28.90
   1  -7  -6  402.16   27.60
   1   7   6  404.76   32.20
  -1   7  -6  391.16   33.10
  -1  -7   6  433.16   34.40
  -1   7   6  408.06   26.20
  -1  -7  -6  434.36   27.70
   1  -7   6  408.46   37.20
  -1  -7  -6  398.96   27.80
   1   7  -6  408.66   32.40
  -1   7   6  433.06   29.60
  -1  -7  -6  357.06   29.70
   1   7   7   77.49   11.40
   1  -7  -7   74.79    9.60
   1   7   7   92.49    7.80
  -1   7  -7   75.49   14.10
  -1  -7   7   92.69   13.50
   1  -7  -7   77.69    9.60
  -1  -7  -7   89.49   10.20
   1  -7   7  117.39   18.10
  -1   7   7   98.89   13.30
  -1  -7  -7   65.89   10.70
  -1  -7  -7   76.49    8.50
   1   7  -7   76.29   13.70
  -1   7   7   86.19    8.60
   1  -7  -8  626.54   38.40
   1   7   8  619.74   36.60
  -1   7  -8  573.74   43.90
  -1  -7   8  529.45   43.60
  -1  -7  -8  551.54   37.30
   1  -7   8  515.85   43.50
  -1  -7  -8  641.14   38.50
   1   7  -8  575.14   42.70
  -1   7  -9 1016.80   66.39
  -1  -7  -9 1002.70   62.49
   1  -7   9  943.31   65.09
   1   7  -9 1018.50   66.19
  -1  -7  10  171.98   13.60
   1  -7 -10  196.98   13.70
  -1   7 -10  176.88   16.70
  -1  -7 -10  186.78   13.70
   1   7 -10  171.98   16.80
   1   8   0    1.30    2.90
  -1   8   0    6.90    3.00
  -1  -8   0   -1.40    4.00
   1  -8   0    0.90    4.80
  -1  -8   1    5.90    4.60
  -1   8  -1    2.50    3.00
   1   8   1    5.50    2.80
   1  -8  -1    0.40    5.10
   1   8  -1    2.80    3.20
  -1  -8  -1    5.80    5.00
   1  -8   1    7.90    4.70
  -1   8  -2   21.30    4.40
  -1   8  -2   19.00    6.00
   1   8   2   20.20    3.60
  -1  -8   2   25.00    5.60
   1  -8  -2   13.60    6.30
   1  -8  -2   21.00    5.10
  -1   8   2   22.40    4.10
  -1  -8  -2   15.50    6.90
   1   8  -2   20.80    9.40
   1  -8   2   22.80    5.80
   1   8  -2   21.40    4.30
  -1  -8  -2   26.30    4.80
   1   8   3   25.90    4.40
   1   8   3   35.20    4.40
   1  -8  -3   38.50    6.00
  -1  -8   3   33.40    6.10
   1  -8  -3   30.00    8.50
  -1   8  -3   21.50    7.10
   1  -8   3   34.60    6.90
  -1  -8  -3   28.80    5.90
   1   8  -3   21.30    6.80
  -1  -8  -3   34.50    8.70
  -1   8   3   34.00    5.40
   1  -8   3   22.10    6.40
   1   8  -3   31.30    4.90
  -1   8  -4   92.49    8.30
   1   8   4  101.79   10.20
  -1  -8   4   88.19   11.80
  -1   8  -4   85.39   12.70
   1  -8  -4  112.09   14.00
   1  -8  -4  107.79   11.20
  -1   8  -4  121.49    9.80
  -1   8   4  121.59   11.10
   1   8  -4  107.59    9.60
   1   8  -4   95.79   13.70
  -1  -8  -4   97.09   14.00
   1  -8   4   96.59   13.00
  -1  -8  -4  108.09   11.30
   1  -8  -5  106.79   11.70
  -1   8  -5  109.29   15.20
   1  -8  -5  105.79   11.00
  -1  -8   5   84.39   14.60
   1   8   5  102.39   11.60
   1  -8  -5   90.09   14.00
   1  -8  -5  121.49   10.50
   1   8  -5  107.19   16.40
  -1  -8  -5  109.69   15.50
   1  -8   5   94.49   15.80
   1   8  -5  109.59    9.80
  -1  -8  -5  108.89   12.10
   1   8   6   34.90    7.60
  -1   8  -6   26.10   10.70
   1  -8  -6   23.70    5.40
   1  -8  -6   32.30    7.10
  -1  -8   6   36.10   11.00
   1  -8  -6   37.10    6.20
   1  -8   6   28.20   11.90
  -1  -8  -6   36.80    6.30
  -1  -8  -6   42.20    6.30
   1   8  -6   25.00    9.90
  -1  -8  -6   49.00    8.10
  -1   8   6   39.40    7.80
  -1   8   6   30.40    3.60
   1  -8  -7  123.69   11.60
  -1  -8   7  149.39   18.90
   1  -8  -7  127.99   11.90
  -1   8  -7   97.99   15.50
   1   8   7  146.69   13.80
   1   8  -7  134.59   16.50
  -1   8   7   98.19   10.60
  -1  -8  -7   97.89   10.10
  -1  -8  -7  108.39   12.50
  -1   8   7  131.89   13.40
  -1  -8  -7  131.29   11.70
   1  -8  -8   38.80    6.00
  -1   8  -8   35.60   10.90
   1   8  -8   25.10    9.10
   1  -8   8   32.90    8.00
  -1  -8  -8   31.40    5.40
  -1  -8  -8   43.00    6.20
  -1   8  -9   -3.00    6.10
  -1  -8  -9    7.10    4.50
   1   8  -9    1.20    6.70
   1  -8   9    3.60    4.80
   1  -8 -10   49.20    6.10
  -1   8 -10   43.40    6.50
   1   8 -10   43.30    6.70
  -1  -8 -10   51.99    6.10
   1  -8  10   46.40    5.90
  -1  -9   0 1566.84   97.99
   1  -9   0 1594.54   97.89
   1  -9  -1    2.80    4.20
  -1  -9   1    5.90    5.20
  -1   9  -1    6.30    4.10
   1   9   1    7.60    3.70
   1  -9  -1   18.70    7.30
  -1  -9  -1    7.80    4.20
  -1   9   1    1.70    3.30
   1   9  -1    6.80    4.10
   1  -9   1    8.80    5.80
  -1  -9  -1    6.00    6.70
  -1  -9   2 1241.58   77.59
   1  -9  -2 1212.58   78.99
  -1   9   2 1192.78   75.19
  -1  -9  -2 1269.97   79.09
   1   9  -2 1146.99   77.59
   1  -9   2 1248.28   78.09
   1  -9  -3  503.75   34.40
  -1  -9   3  492.65   35.60
   1  -9  -3  499.75   37.50
   1   9   3  513.35   33.00
  -1   9  -3  506.15   36.90
  -1   9  -3  535.85   34.00
   1   9  -3  473.35   36.20
   1   9  -3  523.05   34.00
  -1   9   3  473.95   32.70
  -1  -9  -3  540.85   34.50
  -1   9   3  575.94   33.00
   1  -9   3  586.64   37.00
  -1  -9  -3  513.15   37.70
   1  -9  -4  626.64   40.00
  -1   9  -4  608.24   43.00
   1  -9  -4  634.94   40.30
   1  -9  -4  591.34   43.80
  -1  -9  -4  661.13   40.60
   1   9  -4  639.24   39.50
  -1   9   4  605.94   41.00
   1   9  -4  590.64   43.10
  -1  -9  -4  536.45   43.40
   1  -9   4  623.64   50.29
  -1   9  -5  632.44   44.70
   1  -9  -5  592.44   40.30
   1  -9  -5  678.23   41.20
   1   9   5  605.64   39.80
   1  -9  -5  630.24   40.50
  -1  -9  -5  546.55   44.70
   1   9  -5  589.44   44.30
  -1   9   5  664.73   40.90
  -1  -9  -5  637.24   41.20
   1   9  -5  653.73   40.00
   1  -9  -6 1263.17   75.89
   1  -9  -6 1198.48   76.19
  -1  -9  -6 1172.48   76.19
  -1   9   6 1247.98   76.89
  -1   9  -7  -16.90    8.40
   1  -9  -7   -5.00    4.90
   1  -9  -7    4.10    4.40
   1  -9   7   -7.40    5.00
  -1  -9  -7    9.60    5.20
  -1  -9  -7   -9.90    4.40
  -1  -9  -7   -6.40    5.30
   1   9  -7   -8.10    8.00
  -1   9  -8  269.47   22.50
   1  -9  -8  305.97   21.10
  -1  -9  -8  267.27   18.80
   1   9  -8  228.58   21.50
   1  -9   8  276.67   20.20
  -1  -9  -8  229.18   18.00
   1  -9  -9    1.90    3.40
  -1   9  -9   -6.70    4.80
   1   9  -9   -3.00    5.00
   1  -9   9    1.20    3.40
  -1  -9  -9    1.60    3.10
  -1 -10   0    8.50    4.50
  -1 -10   0    3.40    6.50
  -1  10   0    3.60    4.20
   1 -10   0   -0.30    6.40
   1 -10   0   12.20    6.60
   1  10   0   -0.50    4.30
   1 -10  -1  116.39   15.00
   1 -10  -1  119.69   11.60
   1  10   1  126.39   10.90
  -1  10  -1  135.49   11.20
  -1 -10   1  136.09   11.10
  -1 -10   1  112.79   14.50
   1 -10  -1  124.59   12.60
   1 -10   1  129.49   12.30
  -1  10   1  121.89   10.70
   1  10  -1  140.79   11.60
   1  10  -1  128.29   14.30
   1 -10   1  113.39   11.00
  -1 -10  -1  118.19   14.60
   1 -10   1  123.59   14.60
  -1 -10   2  111.89   12.40
   1 -10  -2  100.59   11.50
   1  10   2  100.39    9.30
  -1  10  -2  117.29   14.00
   1 -10  -2  107.59   11.00
  -1  10  -2  119.29   10.60
  -1  10   2   99.29    8.90
  -1 -10  -2  107.39   11.40
   1  10  -2   87.89   13.20
  -1 -10  -2   88.89   15.20
   1  10  -2  103.99   10.60
   1 -10   2  115.29   13.60
   1 -10  -3  232.18   17.30
  -1  10  -3  247.08   16.40
  -1 -10   3  216.68   19.10
   1 -10  -3  244.18   17.90
  -1  10  -3  225.98   19.90
   1  10   3  218.38   15.40
   1 -10  -3  193.38   20.70
   1 -10   3  193.18   16.30
   1 -10   3  202.88   16.30
  -1 -10  -3  216.28   21.20
   1  10  -3  236.48   16.60
   1  10  -3  193.88   20.30
  -1 -10  -3  239.78   17.80
   1 -10   3  237.38   20.00
   1 -10  -4    2.60    5.20
   1 -10  -4    6.10    6.60
   1 -10  -4   -6.00    7.60
  -1 -10   4    4.40    6.10
  -1  10  -4   -4.80    7.40
  -1 -10  -4    1.80    6.50
   1  10  -4    1.00    4.10
   1 -10   4    2.70    6.70
  -1 -10  -4   -3.10    7.30
   1  10  -4   -3.50    8.00
   1 -10   4    1.50    3.60
   1 -10  -5   15.40    6.40
   1 -10  -5   11.70    5.20
  -1  10  -5    8.60    8.30
  -1 -10   5   27.50    8.70
   1  10  -5   13.20    8.90
  -1 -10  -5   13.50    6.60
   1 -10   5    8.80    4.40
   1 -10   5   35.30    9.90
  -1 -10  -5   14.90    5.70
   1 -10  -6   19.00    4.90
   1 -10  -6    9.40    4.20
   1 -10  -6   15.60    6.00
  -1  10  -6   10.60    8.50
  -1 -10  -6   19.20    6.20
  -1 -10  -6   13.40    4.90
   1 -10   6   10.10    5.10
   1  10  -6    6.00    8.40
   1 -10  -7    3.30    4.30
  -1  10  -7   -2.10    6.80
   1 -10  -7   -3.70    4.20
  -1 -10  -7   -4.20    4.50
   1 -10   7   -4.00    4.50
  -1 -10  -7    1.70    4.10
   1  10  -7  -10.50    6.00
   1 -10  -8    7.20    3.70
  -1  10  -8    1.00    5.50
   1 -10   8    2.80    3.80
   1  10  -8    0.90    5.10
  -1 -10  -8    5.90    3.40
  -1 -11   0  133.29   15.10
  -1 -11   0  122.19   11.90
   1 -11   0  140.79   12.40
  -1 -11   0  135.09   12.00
   1 -11   0  131.19   12.20
   1 -11   0  143.29   15.70
   1  11   0  128.49   11.60
  -1  11   0  137.59   11.50
   1 -11  -1 1508.25   94.89
  -1 -11   1 1407.76   90.99
  -1 -11   1 1485.95   91.09
  -1 -11   1 1557.94   94.29
   1 -11   1 1347.27   90.99
   1 -11   1 1573.84   94.69
  -1 -11  -1 1415.76   94.49
   1  11   2  671.53   42.70
   1 -11  -2  619.64   47.10
   1 -11  -2  741.93   43.80
  -1 -11   2  650.83   43.20
  -1 -11   2  718.23   46.60
   1 -11  -2  642.24   43.80
  -1 -11   2  621.44   43.20
   1 -11   2  697.33   46.90
   1 -11   2  661.93   43.40
  -1  11   2  679.33   42.60
  -1 -11  -2  681.13   47.50
   1  11  -2  673.23   45.90
   1 -11   2  680.63   43.50
  -1 -11  -2  739.43   44.10
  -1 -11   3   31.80    5.10
  -1  11  -3   37.20    9.40
   1  11   3   35.80    4.70
   1 -11  -3   26.20   13.00
   1 -11  -3   33.90    7.30
  -1 -11   3   31.20   10.80
   1 -11  -3   35.60    6.40
   1  11  -3   32.40    5.50
   1 -11   3   39.40    5.60
  -1 -11  -3   29.50   12.30
  -1 -11  -3   25.50    5.90
   1  11  -3   21.80    8.10
  -1 -11  -3   35.00    7.00
   1 -11   3   31.50    6.00
   1 -11  -4   29.60    6.80
  -1  11  -4   31.10    8.70
   1 -11  -4   25.00    5.70
   1 -11   4   29.40    5.10
   1 -11   4   29.80    5.90
   1  11  -4   30.40    9.20
  -1 -11  -4   24.50    5.50
  -1 -11  -4   35.00    7.00
   1 -11  -5  390.26   25.50
  -1  11  -5  384.86   28.60
   1 -11  -5  387.06   26.10
  -1 -11  -5  378.76   25.60
   1 -11   5  346.07   25.80
   1  11  -5  369.76   28.80
  -1 -11  -5  406.16   26.30
   1 -11  -6  841.62   50.49
   1 -11  -6  712.33   49.40
   1 -11  -6  858.31   50.69
  -1 -11  -6  806.52   50.49
   1  11  -6  836.02   53.09
   1 -11   6  769.12   50.99
  -1  11  -7  171.48   15.60
   1 -11  -7  171.78   16.50
   1 -11   7  213.08   15.00
  -1 -11  -7  188.48   13.40
  -1 -11  -7  178.08   13.00
   1 -11  -8   52.79    5.60
  -1  11  -8   52.99    7.40
   1  11  -8   57.59    7.30
   1 -11   8   69.19    5.90
  -1 -11  -8   71.49    7.80
   1 -12   0    2.00    4.40
   1 -12   0    2.90    5.20
  -1  12   0   12.10    6.80
  -1 -12   0    4.60    4.20
   1  12   0    3.10    4.30
  -1 -12   0    9.30    4.90
   1  12   0    9.00    6.10
   1  12   1  268.07   20.50
  -1  12  -1  302.27   22.00
   1 -12  -1  271.27   19.50
   1  12   1  264.47   18.20
  -1 -12   1  254.77   18.80
   1 -12  -1  267.57   19.40
  -1 -12   1  251.57   18.90
   1  12  -1  247.38   21.20
   1 -12   1  245.98   19.00
  -1 -12  -1  265.77   19.20
  -1 -12  -1  268.37   19.60
   1 -12   1  261.47   19.10
   1  12  -1  274.07   18.70
   1 -12  -2   11.10    5.10
  -1 -12   2   17.50    5.00
  -1  12  -2    4.00    6.80
  -1 -12   2   10.10    4.10
   1 -12  -2   18.30    6.20
   1  12   2    9.60    3.70
   1  12  -2   11.20    4.50
   1 -12   2   11.20    4.40
  -1 -12  -2   13.60    5.90
   1  12  -2    7.90    6.90
   1 -12   2   13.50    4.70
  -1 -12  -2   14.20    5.20
  -1 -12   3   28.70    4.90
  -1 -12   3   24.30    7.80
  -1  12  -3   32.70    8.30
   1 -12  -3   22.00    6.10
   1 -12  -3   17.50    5.10
  -1 -12  -3   24.10    5.40
   1 -12   3   28.10    5.50
   1  12  -3   24.40    7.60
  -1 -12  -3   26.00    6.10
   1 -12   3   21.40    4.50
  -1  12  -4   -0.70    6.00
   1 -12  -4    2.70    5.00
  -1 -12   4    1.30    3.50
   1 -12  -4    7.90    4.20
   1  12  -4    0.50    6.50
  -1 -12  -4    1.40    4.10
  -1 -12  -4    2.50    4.80
   1 -12   4   -1.90    3.90
   1 -12  -5  185.78   15.10
   1 -12  -5  181.28   13.60
  -1  12  -5  165.28   16.00
  -1 -12  -5  174.78   13.60
  -1 -12  -5  171.48   13.10
   1  12  -5  171.78   15.70
   1 -12   5  158.68   13.00
   1 -12   5  159.28   13.30
   1 -12  -6   15.60    3.70
  -1  12  -6   15.40    5.50
   1  12  -6   16.80    5.80
  -1 -12  -6   20.70    4.10
   1 -12   6   25.60    4.00
   1 -13   0  280.57   20.10
  -1  13   0  307.27   21.80
  -1 -13   0  270.37   19.90
   1  13   0  274.97   21.50
  -1 -13   0  292.97   19.80
   1 -13   0  288.47   19.90
   1 -13  -1  109.49   10.60
  -1  13  -1  124.89   13.00
   1  13   1  111.99   11.70
  -1 -13   1  108.29   10.10
   1 -13  -1  115.89   11.10
  -1 -13  -1  112.89   10.60
  -1 -13  -1  109.19   10.90
   1  13  -1  102.99   12.50
   1 -13   1  108.99   10.40
   1 -13   1  116.49   10.40
  -1 -13   2  689.73   44.10
   1  13   2  710.23   44.90
  -1 -13   2  675.33   43.90
   1  13  -2  718.53   45.80
   1 -13   2  698.43   44.00
   1 -13   2  676.13   45.60
  -1  13  -3  201.78   16.50
  -1 -13   3  177.58   13.60
  -1 -13   3  169.28   13.60
   1 -13  -3  180.68   13.50
   1 -13  -3  186.48   14.10
   1  13   3  195.58   14.60
  -1 -13  -3  178.18   13.60
   1 -13   3  173.08   13.70
  -1 -13  -3  182.38   15.00
   1  13  -3  197.68   19.60
   1 -13   3  186.18   13.60
   1 -13  -4  305.47   20.30
  -1  13  -4  323.57   22.50
   1 -13  -4  291.87   20.70
   1  13  -4  325.27   22.90
  -1 -13  -4  321.37   20.80
   1 -13   4  293.67   20.60
  -1 -13  -4  293.17   20.40
   1 -13   4  330.97   22.10
  -1 -13   5  126.79    9.80
  -1  13  -5  130.99   11.40
   1 -13  -5  130.19    9.60
   1 -13   5  131.29    9.80
   1  13  -5  138.99   11.70
  -1 -13  -5  112.39   10.10
   1 -13   5  120.59    9.90
  -1 -13  -5  133.99    9.70
   1 -14   0    3.30    3.40
   1  14   0   -1.50    3.90
  -1 -14   0    2.60    2.90
  -1 -14   0    2.20    3.30
   1 -14   0    4.80    3.30
  -1  14   0   -2.60    4.30
   1  14   1   25.60    4.70
   1 -14  -1   23.30    4.00
  -1 -14   1   24.60    3.90
  -1 -14   1   24.20    4.10
   1 -14  -1   21.20    4.20
  -1  14  -1   27.30    5.50
   1  14  -1   27.60    5.40
  -1 -14  -1   24.50    3.90
  -1  14   1   25.10    5.00
   1 -14   1   29.70    4.40
  -1 -14  -1   27.60    4.40
   1 -14   1   27.80    4.00
  -1 -14   2   77.89    7.10
   1 -14  -2   69.69    7.30
  -1 -14   2   73.19    7.20
   1 -14  -2   74.79    7.50
   1  14   2   75.59    8.00
  -1  14  -2   76.39    9.20
  -1 -14  -2   77.69    7.70
   1  14  -2   73.89    8.60
   1 -14   2   88.89    9.80
   1 -14   2   78.69    7.30
  -1 -14  -2   73.49    7.20
  -1  14   2   83.09    8.60
  -1  14  -3    1.00    3.40
  -1 -14   3   -1.80    2.50
   1 -14  -3   -1.40    2.40
   1 -14  -3    0.50    2.90
  -1 -14   3    0.90    2.40
   1  14   3   -0.10    2.70
  -1 -14  -3    1.20    3.00
   1  14  -3   -0.90    3.40
  -1  14   3    2.10    3.10
   1 -14   3   -0.20    2.20
  -1 -14  -3    0.80    2.60
  -2   0   1   10.00    1.20
  -2   0   1    7.40    0.90
   2   0   2 1463.15   92.39
   2   0  -2 1564.34   92.19
   2   0  -3    0.50    1.00
  -2   0   3    1.50    1.20
   2   0   3    0.60    2.00
  -2   0   3    2.00    1.30
  -2   0  -3    0.90    1.70
   2   0   4 2926.41  178.68
  -2   0   5    2.10    2.70
   2   0  -5    7.30    2.40
   2   0   5    5.70    4.40
  -2   0   5    3.50    2.70
   2   0   5    0.40    3.30
   2   0  -5    0.20    2.30
   2   0   5   -0.80    3.60
  -2   0   6 1257.47   79.29
   2   0  -6 1264.07   77.69
   2   0  -7    3.10    3.80
   2   0  -7    3.50    2.70
  -2   0   7   -0.80    4.30
  -2   0   7    5.00    4.60
   2   0   7    0.80    4.00
   2   0   7   -3.20    5.50
  -2   0  -7    0.10    3.80
   2   0   7    4.70    6.30
   2   0   7   12.30    4.50
   2   0  -7   -5.00    3.30
   2   0   8 3482.25  210.28
  -2   0   8 3250.67  208.48
   2   0  -8 3407.26  205.48
  -2   0  -8 3306.27  206.58
   2   0  -9    2.00    3.80
   2   0   9   -8.70    7.60
  -2   0  -9   -2.80    5.30
  -2   0   9    4.10    4.60
   2   0   9   -0.70    6.20
   2   0   9  -10.70    6.20
  -2   0   9    5.10    5.80
  -2   0   9   -5.00    5.70
   2   0  10  114.09   15.90
   2   0 -10  146.19   10.50
  -2   0 -10  148.39   15.20
  -2   0  10  129.39   13.40
  -2   0 -10  148.59   13.00
  -2   0 -11   -0.90    3.50
  -2   0  11   -7.40    4.30
  -2   0  12  674.73   45.90
   2   0  12  792.52   47.00
  -2  -1   0    1.10    0.50
  -2   1   0    0.00    0.60
  -2   1   0    1.70    0.80
   2  -1   0    2.50    0.90
   2  -1   0    1.50    0.80
   2   1   0    0.90    0.40
   2   1   1    2.90    1.00
   2  -1  -1    3.80    1.00
   2   1   1    2.60    0.80
  -2   1  -1    1.90    1.10
  -2   1   1    3.00    1.00
   2  -1   1    1.70    1.20
  -2   1   1    2.50    0.80
   2  -1   1    6.30    1.60
  -2   1  -2 2282.37  148.79
  -2  -1  -2 2485.25  149.49
   2   1   3 2017.50  124.29
   2   1  -3 2052.99  123.89
  -2  -1   4    6.10    2.00
   2   1   4    5.10    3.00
   2   1   4    7.80    3.20
   2   1   4    8.50    2.50
  -2  -1   4    7.90    2.20
   2   1  -4   10.50    1.70
  -2   1   4    9.10    2.70
  -2  -1  -4    6.90    2.90
   2   1  -4    6.60    1.70
   2  -1   4   10.90    3.90
  -2   1   4    8.80    2.60
   2  -1   4    8.30    3.30
  -2  -1   5  174.58   12.20
  -2  -1   5  160.28   12.10
   2  -1  -5  142.19   11.20
   2   1   5  154.18   12.10
   2  -1  -5  165.38   11.50
   2   1   5  184.08   13.50
   2   1   5  187.78   13.60
  -2   1   5  160.78   12.40
   2  -1   5  199.38   14.30
  -2  -1  -5  153.58   12.70
  -2   1   5  169.78   12.70
   2   1  -5  166.78   11.00
   2   1  -5  148.59   11.10
   2   1   6  196.18   16.50
  -2  -1   6  200.88   14.90
   2  -1  -6  183.98   13.60
  -2  -1   6  208.88   14.90
   2   1   6  228.48   16.70
  -2   1   6  200.28   15.10
   2  -1   6  193.98   16.70
  -2   1   6  216.88   15.60
   2   1  -6  177.48   13.10
   2  -1   6  199.18   16.80
   2   1  -6  170.68   13.40
  -2   1  -7  107.49   10.40
  -2   1  -7  121.29   11.70
   2   1   7  123.99   14.00
   2  -1  -7  122.79   10.20
   2  -1  -7  107.19    9.50
   2   1   7  137.39   13.90
   2   1   7  122.09   13.40
  -2  -1   7  120.59   11.70
  -2  -1   7  117.69   12.00
   2  -1   7  121.59   12.30
  -2  -1  -7  122.69   10.60
  -2   1   7  112.89   12.50
   2   1  -7  119.69    9.00
   2   1  -7  115.69   11.70
  -2   1   7  127.29   12.10
  -2  -1  -7  122.49   11.00
   2   1  -7  136.59   11.80
   2  -1   7  131.19   14.20
   2  -1   7  110.59   15.60
   2  -1   7  121.39   17.60
   2   1   8  393.46   31.40
   2   1   8  366.96   30.70
  -2   1  -8  416.56   27.90
   2  -1  -8  396.06   28.90
   2   1   8  424.96   28.30
  -2   1  -8  414.66   28.60
   2   1   8  456.95   28.30
  -2  -1   8  373.66   27.00
  -2  -1   8  352.86   29.20
   2  -1  -8  407.86   27.20
  -2   1   8  457.45   27.50
  -2  -1  -8  381.46   28.30
   2   1  -8  390.26   26.30
   2  -1   8  444.76   28.70
   2  -1   8  418.46   29.00
  -2  -1  -8  419.96   28.90
  -2   1   8  396.06   30.00
   2   1  -8  345.17   29.90
   2  -1   8  430.56   32.50
   2  -1   8  369.36   31.50
   2   1  -8  403.66   26.10
  -2   1   8  410.56   29.50
  -2   1  -9 2129.29  128.19
   2   1   9 1916.61  131.79
   2  -1  -9 2100.79  127.29
  -2  -1   9 1859.41  129.49
   2   1   9 1951.40  131.59
  -2   1   9 1923.21  130.39
   2   1  -9 2202.48  127.49
  -2   1   9 2017.80  129.99
   2  -1   9 2229.88  134.19
  -2  -1  -9 2159.38  129.29
   2  -1   9 2183.58  133.09
  -2   1 -10  238.08   16.90
   2  -1 -10  229.48   16.10
   2   1  10  225.28   19.50
  -2  -1  10  237.58   17.90
  -2  -1 -10  172.48   22.50
  -2   1  10  232.98   17.50
   2  -1  10  223.58   21.10
  -2  -1 -10  213.88   17.60
   2   1  11  234.18   18.70
  -2  -1 -11  223.38   16.50
   2  -1  11  227.48   20.70
   2   1  12   -8.10    4.40
  -2  -1  12   -1.40    3.40
  -2   1  12   -0.80    3.40
   2  -2  -1 1631.14   99.49
  -2   2  -2 3419.56  232.18
  -2  -2  -2 4003.60  231.28
  -2   2  -3 5962.00  403.66
  -2   2   3 6826.02  404.56
  -2  -2  -3 6886.51  405.36
   2  -2  -4   65.69    5.60
  -2   2  -4   56.19    5.90
   2   2   4   68.19    7.10
  -2  -2   4   65.59    5.70
   2  -2  -4   77.19    6.40
   2   2   4   67.79    5.80
  -2  -2   4   69.99    5.60
  -2   2   4   77.69    6.90
   2   2  -4   71.89    4.80
  -2  -2  -4   75.79    7.30
   2   2  -4   62.19    4.90
   2  -2   4   90.29    8.90
   2  -2   4   59.19    7.40
   2   2   5  103.99   10.30
  -2  -2   5  118.29    8.90
   2   2   5  112.69   10.10
   2  -2  -5   92.69    7.90
  -2  -2   5  100.79    8.60
   2   2   5   91.69    8.30
   2   2  -5   95.69    7.40
   2  -2   5  100.79   10.70
   2   2  -5  102.39    7.10
  -2  -2  -5  109.39   10.00
  -2   2   5  112.59    9.50
  -2   2   5  113.29    9.40
  -2  -2   6  330.27   24.40
   2  -2  -6  327.77   23.50
   2   2   6  369.06   26.10
   2   2   6  381.86   26.00
  -2  -2   6  389.86   24.70
  -2   2   6  349.57   24.80
   2  -2   6  334.47   26.70
   2   2  -6  343.87   22.50
  -2   2   6  361.56   25.20
   2  -2   6  397.06   27.50
  -2  -2   7 1659.33  112.39
   2   2  -7 1609.94  109.79
   2   2  -7 1861.81  110.89
  -2  -2  -7 1718.93  111.29
   2  -2   7 1970.20  115.89
   2  -2   7 1930.51  112.19
   2  -2   7 1833.92  111.89
  -2   2  -8  360.36   24.90
   2   2   8  297.47   26.90
  -2  -2   8  318.77   24.90
   2   2   8  344.17   27.10
   2  -2  -8  314.97   23.30
   2  -2  -8  335.97   23.10
  -2   2  -8  348.17   23.50
   2   2   8  349.37   25.90
   2  -2   8  378.66   25.20
  -2   2   8  331.87   25.80
   2   2  -8  339.97   21.30
   2   2  -8  309.97   25.50
   2  -2   8  335.37   25.70
  -2   2   8  347.67   25.50
   2  -2   8  363.56   28.90
   2  -2   8  305.87   28.60
   2   2  -8  327.67   21.40
  -2  -2  -8  277.07   24.10
  -2   2  -9  428.86   27.30
   2   2   9  351.66   32.00
  -2  -2   9  370.56   27.60
  -2  -2   9  425.56   28.30
   2   2   9  419.26   28.80
   2  -2  -9  424.16   27.30
   2   2   9  357.26   31.70
   2  -2  -9  425.56   28.30
  -2  -2   9  364.66   29.70
  -2   2  -9  429.26   27.90
   2  -2   9  389.66   34.40
  -2  -2  -9  412.96   28.40
  -2   2   9  418.66   27.80
   2   2  -9  387.46   29.90
   2   2  -9  417.16   25.20
  -2  -2  -9  406.76   29.50
  -2   2   9  394.26   30.40
   2  -2   9  453.75   31.20
   2  -2   9  445.16   34.70
  -2   2   9  408.16   30.90
   2  -2 -10    6.80    4.50
   2  -2 -10   12.50    8.90
  -2   2 -10   13.70    4.20
  -2  -2  10    5.40    5.10
  -2   2 -10   18.70    5.30
  -2   2  10   -2.80    4.50
  -2  -2 -10    1.40    8.10
  -2  -2 -10    4.40    6.20
  -2  -2  11  695.53   44.80
   2   2  12   43.90    6.90
  -2  -2  12   42.50    6.70
   2  -2  12   51.59    7.50
  -2   2  12   59.39    6.40
   2  -3   0    4.80    1.70
  -2   3   0    1.20    1.40
  -2   3   0    4.20    1.40
   2  -3  -1 1847.12  112.69
  -2   3  -2 2684.93  187.78
  -2   3   2 3263.57  187.08
  -2  -3   3   28.30    2.40
   2   3   3   33.40    4.50
   2  -3  -3   23.90    3.30
   2   3   3   30.50    4.20
   2  -3  -3   32.10    4.30
  -2   3  -3   20.10    3.10
  -2   3   3   24.60    3.70
   2  -3   3   26.10    4.90
  -2  -3  -3   27.60    4.60
  -2   3   3   29.80    3.90
   2  -3  -4 2165.78  124.69
  -2   3  -4 2021.60  124.49
   2   3  -4 1849.61  123.59
   2   3  -4 2105.29  123.69
   2  -3  -5   33.40    4.90
  -2   3  -5   36.60    4.90
   2   3   5   38.50    6.50
  -2  -3   5   31.40    4.80
   2   3   5   49.10    7.20
  -2  -3   5   42.90    6.10
  -2  -3  -5   29.10    6.40
   2   3  -5   28.60    3.00
  -2  -3  -5   33.50    5.00
  -2   3   5   46.90    6.30
   2  -3   5   48.20    9.20
   2   3  -5   32.20    2.90
  -2   3   5   42.90    6.20
   2  -3   5   36.30    7.70
   2   3   6  282.17   18.10
   2  -3  -6  258.17   17.80
  -2   3  -6  269.67   17.70
  -2  -3   6  294.47   19.20
   2   3   6  253.67   20.50
   2  -3  -6  239.98   17.40
   2   3   6  242.38   19.90
   2  -3   6  337.07   32.90
   2  -3   6  254.47   22.00
   2   3  -6  246.58   18.90
  -2  -3  -6  241.68   18.20
  -2   3   6  242.98   19.10
  -2   3   6  241.78   19.30
   2   3  -6  234.68   16.00
   2   3   7  191.28   17.00
   2   3   7  175.88   17.40
   2  -3  -7  167.88   14.10
  -2   3  -7  186.98   13.30
   2  -3  -7  170.98   13.50
   2   3   7  185.28   14.30
  -2   3  -7  202.68   16.60
  -2  -3   7  173.08   15.00
  -2   3   7  171.98   15.50
   2   3  -7  155.98   15.40
   2  -3   7  186.58   19.80
  -2   3   7  175.78   13.40
  -2  -3  -7  175.38   12.90
  -2  -3  -7  162.58   13.80
  -2   3   7  177.48   16.10
   2   3  -7  170.08   11.30
   2  -3   7  148.99   15.30
  -2  -3  -7  184.88   15.60
   2  -3  -8  106.79   12.30
   2  -3  -8  119.69   11.40
   2   3   8  106.59   14.60
  -2   3  -8  135.19   10.90
   2   3   8  117.39   12.70
  -2   3  -8  128.99   11.40
   2   3   8  119.89   16.40
   2  -3   8  146.29   17.70
  -2   3   8  132.29   11.40
  -2   3   8  129.59   13.80
  -2  -3  -8  119.39   12.70
   2  -3   8  123.29   18.10
   2   3  -8  135.39   14.70
  -2   3  -9   37.70    5.80
  -2   3  -9   34.00    9.00
  -2   3  -9   29.70    4.90
  -2  -3   9   38.90    6.10
  -2  -3   9   29.30    7.80
   2   3   9   33.10   10.30
   2   3   9   34.20    9.50
   2  -3  -9   31.40    6.20
   2  -3  -9   31.20    7.60
  -2  -3  -9   19.50    6.60
  -2   3   9   31.90    9.40
  -2   3   9   23.70    5.70
  -2   3   9   37.50    8.80
   2  -3   9   45.70    9.60
   2  -3   9   26.50   11.20
   2  -3   9   21.80    8.80
   2   3  -9   39.40    9.20
  -2  -3  -9   20.70    8.70
   2  -3 -10   83.09    9.70
   2  -3 -10   87.79   11.00
   2   3  10   75.29   11.20
  -2   3 -10  114.79   15.50
  -2  -3 -10   51.39   14.30
  -2  -3 -10   73.29   11.20
  -2   3  10   91.59    9.90
  -2  -3  11    7.90    4.40
   2  -3 -11    5.80    5.40
  -2  -3 -11   -1.50    7.70
   2  -3  11  -14.00    6.60
  -2   4   0   20.70    2.90
  -2  -4   0   20.70    2.90
   2  -4   0   32.40    3.80
   2  -4  -1 1654.93  101.29
  -2   4  -2   15.20    3.00
   2   4   2   17.50    3.00
   2   4   2   10.10    2.40
  -2  -4   2   13.80    1.50
  -2  -4   2   19.30    1.90
   2  -4  -2   16.20    3.40
   2  -4   2   21.90    3.40
  -2   4   2    9.70    2.80
  -2  -4  -2   18.30    3.80
  -2  -4  -2   16.70    3.20
  -2   4  -3 1837.42  123.09
   2  -4  -3 2182.28  123.39
  -2  -4  -3 2018.80  123.39
  -2  -4   4 1128.59   70.39
   2   4   4 1192.08   71.99
   2  -4  -4 1219.58   72.19
   2  -4  -4 1096.69   70.79
  -2   4  -4 1076.99   70.49
  -2  -4  -4 1152.68   70.99
   2  -4  -5 2273.37  133.99
  -2   4  -5 2117.49  131.99
   2  -4  -5 2210.88  132.49
  -2  -4  -5 2286.37  134.99
   2  -4   5 1934.01  136.39
  -2  -4  -5 2093.89  132.69
   2   4   6  132.99   10.80
   2   4   6  156.38   14.50
   2  -4  -6  138.59   11.50
   2  -4  -6  120.59   13.30
  -2  -4   6  149.39   12.80
   2   4   6  141.19   13.50
   2  -4   6  162.18   19.30
   2   4  -6  135.89   14.10
   2  -4   6  117.29   16.50
  -2   4   6  132.19   12.50
  -2  -4  -6  122.89   10.30
  -2   4   6  108.49   12.70
  -2   4   6  115.69   12.80
  -2  -4  -6  116.69   11.90
   2   4   7  324.17   26.20
   2   4   7  352.66   27.10
  -2   4  -7  374.36   22.80
   2   4   7  327.87   23.30
  -2  -4   7  363.96   25.30
  -2   4  -7  381.76   27.20
   2  -4  -7  315.17   23.00
   2  -4  -7  338.17   24.00
   2  -4   7  398.96   31.90
  -2   4   7  323.47   25.20
   2   4  -7  359.76   26.20
  -2   4   7  341.77   22.80
  -2  -4  -7  318.77   24.40
  -2   4   7  300.37   25.40
  -2  -4  -7  330.27   23.50
  -2  -4  -7  326.37   23.10
  -2   4  -8    9.70    4.40
   2   4   8    0.20    4.90
  -2   4  -8    9.20    5.50
   2  -4  -8    5.40    5.00
  -2  -4   8   14.20    6.00
   2  -4  -8    9.10    6.90
  -2   4  -8   19.60    8.70
   2   4   8    4.30    8.20
  -2   4   8   10.40    7.10
  -2   4   8   11.30    4.90
   2  -4   8    7.00   10.10
   2  -4   8    5.70    8.20
   2   4  -8   12.40    7.70
  -2  -4  -8    9.60    6.70
   2  -4   8    6.60    7.80
  -2   4   8   14.50    7.10
  -2  -4  -8    9.20    5.30
  -2   4  -9 1360.66   80.69
   2   4   9 1165.58   80.39
   2  -4   9 1323.57   80.49
   2  -4   9 1232.38   78.89
  -2   4   9 1062.69   79.39
   2   4  -9 1215.68   79.59
  -2   4   9 1167.68   79.19
   2  -4 -10  635.14   46.20
  -2   4 -10  793.82   50.19
  -2  -4  10  672.53   47.50
   2   4  10  778.12   46.40
  -2  -4 -10  651.03   46.70
  -2   4  10  768.62   46.10
   2   4 -10  806.32   50.49
   2  -4  10  711.53   48.40
   2  -4  10  756.72   50.49
   2  -4 -11  371.56   26.20
  -2  -4 -11  364.76   26.80
  -2   4  11  459.75   26.40
   2  -4  11  433.56   29.60
  -2  -5   0    0.00    2.10
  -2   5   0    2.50    2.20
   2  -5   0    3.90    2.60
   2  -5  -1   41.40    5.40
   2  -5  -1   30.50    4.00
   2   5   1   35.80    3.40
  -2   5   1   38.00    4.20
  -2  -5  -1   35.10    5.10
  -2   5   1   42.50    4.60
   2  -5  -2   68.09    6.20
   2   5   2   72.19    6.50
   2  -5  -2   89.29    7.90
  -2  -5  -2   85.49    7.90
  -2   5   2   68.59    6.60
  -2   5   2   66.99    6.50
  -2  -5  -2   65.99    6.40
   2  -5  -3 1422.16   90.29
  -2   5  -3 1480.95   90.19
   2  -5   3 1524.95   91.79
  -2  -5  -3 1431.16   90.39
   2  -5  -4  782.92   45.30
  -2   5  -4  704.63   44.80
  -2  -5   4  673.83   46.30
   2   5   4  680.33   45.90
   2   5   4  707.23   46.10
  -2  -5  -4  756.82   45.50
  -2   5   4  729.73   45.90
  -2   5   4  713.73   45.80
   2  -5   4  658.73   48.10
  -2   5  -5   40.10    7.90
  -2  -5   5   55.99    9.70
   2  -5  -5   44.60    6.30
   2  -5  -5   40.30    6.10
   2   5   5   23.20    5.90
  -2   5  -5   31.00    5.10
   2  -5  -5   33.70    6.50
  -2   5  -5   38.50    5.60
   2   5   5   27.40    7.00
   2   5   5   31.20    5.00
  -2   5   5   38.10    6.70
  -2  -5  -5   38.40    5.80
  -2  -5  -5   36.50    5.90
   2   5  -5   38.20    6.90
  -2   5   5   32.70    5.90
   2  -5   5   22.20    9.40
  -2   5   5   45.60    5.20
  -2  -5  -5   34.40    7.90
  -2  -5   6   15.80    6.40
   2  -5  -6   15.30    4.00
  -2   5  -6   12.10    3.80
  -2   5  -6    8.70    3.60
   2   5   6   15.30    3.80
   2  -5  -6   10.40    4.00
   2   5   6   15.20    6.10
   2  -5  -6    8.00    5.10
  -2   5  -6   14.10    7.70
   2   5   6    2.30    6.40
  -2   5   6   12.10    5.20
  -2  -5  -6   17.20    7.10
  -2   5   6    6.70    3.60
   2   5  -6   11.80    6.50
  -2  -5  -6    9.90    5.20
   2  -5   6   13.00    9.50
  -2   5   6    5.50    6.00
   2  -5   6   18.10   12.00
  -2  -5  -6   10.00    5.80
  -2   5  -7   41.40    6.10
   2  -5  -7   35.30    5.00
   2   5   7   31.50   10.30
   2  -5  -7   31.70    7.10
   2   5   7   27.30    7.80
  -2  -5   7   37.40    8.00
  -2   5   7   29.20    8.20
  -2   5   7   39.40    6.00
   2  -5   7   24.50   13.10
  -2  -5  -7   39.40    6.30
  -2   5   7   35.50    7.70
  -2  -5  -7   49.70    5.80
  -2  -5  -7   50.49    8.90
   2   5  -7   55.09   14.50
  -2  -5  -7   29.50    6.30
  -2   5  -8    3.80    2.50
  -2   5  -8    3.40    9.80
   2  -5  -8   -2.90    5.20
  -2  -5   8    0.30    5.00
   2   5   8    1.20    8.10
  -2   5   8   -1.30    4.30
   2  -5   8   -6.90    9.70
  -2   5   8    3.40    5.70
  -2   5   8    5.30    7.00
  -2  -5  -8    0.10    4.10
  -2  -5  -8   -7.40    5.00
   2   5  -8    1.60    8.00
   2  -5   8  -10.90    7.20
  -2   5  -9  118.69   17.40
   2   5   9   99.69   10.90
   2  -5  -9  119.89   14.90
   2  -5  -9   97.49   11.50
   2   5  -9  129.79   16.90
   2  -5   9  141.09   16.00
  -2  -5  -9  103.99   12.10
   2  -5   9  108.69   22.60
   2  -5   9  115.49   15.40
  -2   5   9  123.49   10.90
  -2   5 -10  -10.60    7.20
   2   5  10   -5.90    3.60
   2  -5 -10   -3.60    4.40
  -2   5  10   -1.70    3.80
   2  -5  10    5.00    6.30
   2  -5  10  -11.20    7.00
  -2  -5 -10   -7.60    5.10
   2   5 -10   -0.90    8.10
  -2  -5  11   19.50    3.60
   2  -5 -11   16.00    3.80
  -2  -5 -11   11.50    4.50
  -2   5  11   18.80    3.20
   2  -6   0   74.69    7.50
  -2  -6   0   61.79    6.80
   2  -6  -1    7.00    3.90
   2  -6  -1    8.10    3.60
  -2  -6   1    4.10    2.60
  -2  -6  -1    0.80    3.30
  -2   6   1    4.80    2.50
  -2   6   1   -0.20    2.20
   2  -6   1   12.60    3.60
   2  -6  -2 3566.04  211.48
  -2   6  -2 3353.46  211.28
   2  -6  -3  119.89   10.80
  -2  -6   3  103.49    8.40
   2  -6  -3  114.99    8.90
   2  -6   3   92.19    9.90
  -2  -6  -3   89.99   10.70
  -2   6   3   95.49    9.30
  -2  -6  -3   90.69   10.00
  -2   6   3   88.99    8.90
   2  -6   3  115.09   10.30
  -2   6  -4 3770.02  212.78
   2  -6  -4 3510.85  213.38
   2  -6   4 3179.78  216.18
  -2  -6  -4 3455.35  213.48
   2  -6  -5    1.70    3.90
   2  -6  -5    0.70    5.20
  -2   6  -5   11.80    3.50
   2   6   5   -1.40    5.70
   2  -6  -5    2.50    3.10
  -2  -6   5   -2.70    7.00
  -2   6  -5    6.70    7.50
   2  -6  -5    1.10    3.10
  -2   6  -5    2.10    3.40
   2   6  -5    6.60    6.20
  -2   6   5    9.10    5.10
  -2  -6  -5    8.20    5.00
  -2   6   5    7.50    5.50
   2   6  -5    4.90    3.10
  -2   6   5    1.20    2.90
  -2  -6  -5   -1.90    6.20
   2  -6   5   10.30    8.30
  -2  -6  -5    5.20    4.70
   2  -6   5   -7.30    7.90
  -2   6  -6  599.34   41.20
   2  -6  -6  571.74   34.90
   2  -6  -6  505.55   35.70
   2   6   6  474.65   38.00
  -2   6  -6  586.04   34.90
  -2   6  -6  596.84   35.10
   2  -6  -6  547.35   36.70
   2  -6  -6  561.04   35.60
  -2  -6  -6  543.25   37.10
  -2   6   6  536.55   37.70
   2   6  -6  575.04   39.50
  -2   6   6  513.75   35.00
  -2  -6  -6  538.25   36.00
  -2  -6  -6  560.64   36.50
   2  -6   6  554.44   46.20
  -2   6  -7   76.59   14.40
   2  -6  -7   70.49    8.30
   2  -6  -7   76.19    9.30
  -2   6  -7   82.29    6.50
   2  -6  -7   62.09   10.00
  -2  -6   7   86.79   11.40
   2   6   7  101.79   14.00
  -2   6   7   87.89   11.50
  -2   6   7   62.59    8.60
   2  -6   7   70.49   17.10
   2   6  -7   71.79   12.10
  -2  -6  -7   82.39    9.60
  -2  -6  -7  103.09   13.10
  -2  -6  -7   78.19    8.40
  -2  -6  -7   70.29    9.00
   2   6   8  484.95   30.30
   2  -6  -8  439.96   32.40
  -2  -6   8  448.06   33.00
  -2   6  -8  454.95   37.70
   2  -6  -8  479.85   31.40
   2  -6   8  455.25   34.50
   2  -6   8  415.96   35.60
  -2  -6  -8  486.25   31.60
   2  -6   8  472.15   40.30
  -2  -6  -8  463.55   30.80
  -2  -6  -8  498.65   33.90
   2   6  -8  467.95   36.00
  -2   6   8  499.15   30.50
   2  -6  -9   37.20    6.20
  -2   6  -9   19.20   11.00
   2   6   9   23.30    4.20
  -2  -6  -9   37.10    6.80
   2   6  -9   41.20   10.90
   2  -6   9   16.80    9.20
  -2   6   9   31.90    4.90
   2  -6   9   40.70    9.10
  -2   6 -10 1125.09   69.89
  -2  -6  10 1049.49   67.59
   2  -6  10 1048.80   68.99
   2  -6 -11   20.40    3.50
  -2  -6 -11   18.70    3.80
   2  -6  11   16.40    4.30
  -2  -7   0    9.70    4.00
   2  -7   0    3.50    4.20
   2  -7  -1  781.52   51.09
  -2  -7  -1  719.43   50.69
   2  -7   1  758.62   50.59
  -2   7   1  878.31   49.40
  -2  -7   2  275.87   18.60
   2   7   2  265.77   16.90
   2  -7  -2  257.77   20.20
  -2  -7  -2  255.07   20.20
   2  -7   2  261.57   19.40
   2  -7  -3   87.69   11.00
   2   7   3   83.99    8.30
   2  -7  -3   89.19    9.00
  -2   7  -3   94.99    7.90
  -2  -7   3   89.99    8.50
   2  -7  -3   92.09    8.50
  -2   7  -3   82.89   11.20
   2   7  -3   90.89    8.00
   2  -7   3   81.59   10.10
  -2   7   3   96.19    9.10
  -2  -7  -3   91.59   11.50
   2   7  -3   69.29   10.20
  -2   7  -4    4.90    7.00
  -2  -7   4    7.10    4.70
   2  -7  -4   12.80    6.70
   2  -7  -4   11.30    3.80
   2  -7  -4   10.30    4.60
  -2   7  -4   10.30    3.80
  -2   7  -4    8.70    3.70
   2  -7  -4   16.50    5.80
   2   7   4    2.70    4.60
   2  -7   4   16.10    6.50
  -2   7   4    4.10    4.90
  -2  -7  -4    5.30    4.90
   2   7  -4   10.20    6.20
   2  -7   4    8.70    6.00
  -2  -7  -4   13.50    8.00
   2   7  -4   13.10    3.80
  -2   7  -5    4.70    3.50
   2  -7  -5    8.20    6.70
   2  -7  -5    6.10    5.10
   2  -7  -5   11.70    3.90
   2   7   5    0.40    5.70
   2  -7  -5    5.00    4.00
  -2  -7   5   23.30    9.20
  -2   7  -5    6.80    3.30
  -2   7  -5    3.10    8.40
  -2   7   5   -2.60    5.30
   2   7  -5    6.60    7.30
   2  -7   5    1.90    8.40
   2   7  -5    8.20    3.80
  -2  -7  -5    4.30    5.80
  -2   7   5    9.50    3.20
  -2  -7  -5   -0.40    7.20
   2   7   6  671.93   47.50
   2   7   6  748.53   51.09
  -2  -7   6  778.72   53.79
  -2   7  -6  754.62   54.39
   2  -7  -6  779.02   50.49
   2  -7  -6  821.02   49.30
  -2  -7  -6  761.52   49.70
  -2   7   6  760.12   50.99
   2   7  -6  820.42   53.39
  -2  -7  -6  783.02   49.99
  -2   7   6  825.32   48.30
   2  -7  -7   93.79    9.50
   2  -7  -7   99.29   14.00
   2   7   7  105.99   14.00
  -2   7  -7   81.59   15.30
   2   7   7   72.09    7.10
  -2  -7   7   99.19   12.10
   2  -7  -7   94.69   10.00
   2  -7   7  108.39   19.20
  -2   7   7   96.89   13.20
  -2   7   7   97.29    9.00
  -2  -7  -7  102.49   10.40
  -2  -7  -7   74.99   11.00
  -2  -7  -7   73.29    9.30
   2   7  -7   72.89   12.80
   2  -7  -8   32.60    6.20
  -2   7  -8   15.20   11.30
  -2   7   8   28.20    4.60
  -2  -7  -8   24.70    5.90
  -2  -7  -8   36.70    6.40
   2  -7   8   31.20   13.10
   2  -7   8   16.20    8.10
   2   7  -8   34.20   10.70
   2  -7  -9    5.40    4.70
   2   7  -9   -6.90    7.10
  -2   7   9   -1.00    3.00
  -2  -7  -9   -0.10    4.90
   2  -7   9    0.90    5.70
  -2   7 -10   56.69    8.20
   2  -7 -10   74.89    7.90
   2  -7  10   67.99    8.10
   2   7 -10   79.99   11.40
   2  -7  10   50.89    7.30
  -2   8   0  461.85   29.60
   2  -8   0  465.55   32.10
  -2  -8   0  471.45   31.80
   2   8   0  451.35   29.70
   2  -8  -1  433.06   32.00
   2   8   1  458.15   29.40
  -2   8  -1  479.55   29.60
  -2  -8   1  466.05   31.20
  -2  -8  -1  446.86   31.90
   2   8  -1  465.55   30.90
   2  -8   1  447.86   31.60
  -2  -8   2  559.34   38.60
   2  -8  -2  566.94   40.20
   2   8   2  576.04   37.10
  -2   8  -2  640.64   37.60
  -2  -8  -2  553.34   37.80
  -2  -8  -2  602.54   40.40
   2   8  -2  622.54   37.60
   2   8  -2  512.25   43.60
   2  -8   2  640.94   39.80
   2  -8  -3 1163.88   69.89
   2   8   3  975.00   65.79
  -2   8  -3 1144.49   69.09
  -2  -8   3 1047.70   67.49
   2   8   3 1073.99   65.19
   2  -8   3 1107.49   69.09
  -2  -8  -3 1056.19   66.89
   2  -8   3 1058.59   69.29
   2   8  -3  967.40   68.29
  -2  -8  -3 1068.59   69.59
   2   8   4   73.89    8.60
   2  -8  -4   91.19    9.60
   2  -8  -4   69.19   11.50
   2  -8  -4   95.09   10.20
   2   8  -4   86.89   13.20
  -2  -8  -4   83.19   10.60
   2   8  -4   90.29    8.70
  -2  -8  -4   73.19   12.10
  -2   8   4   96.19   10.30
   2  -8   4   94.79   12.90
   2   8   5  610.84   41.80
   2  -8  -5  666.53   41.20
  -2   8  -5  617.44   45.70
   2  -8  -5  622.24   41.20
   2  -8  -5  654.03   41.60
  -2   8   5  694.33   39.80
   2   8  -5  654.43   40.90
  -2   8   5  660.13   44.20
  -2  -8  -5  640.44   42.10
  -2  -8  -5  589.74   45.40
   2   8  -5  607.64   44.90
  -2  -8   6  289.07   25.10
   2  -8  -6  299.37   20.80
   2  -8  -6  307.07   20.00
   2  -8  -6  307.87   21.00
   2   8   6  275.87   21.60
  -2   8  -6  264.47   26.80
  -2   8   6  304.17   22.40
   2  -8   6  265.47   29.20
  -2  -8  -6  280.77   21.60
  -2  -8  -6  280.77   20.50
   2   8  -6  261.77   25.40
   2   8   7  114.29   12.90
   2  -8  -7  100.59   10.70
  -2  -8   7  125.29   13.20
   2  -8  -7  120.99   11.50
  -2   8  -7   99.79   15.90
  -2  -8  -7  130.89   11.30
  -2  -8  -7   97.09   10.60
  -2  -8  -7   97.09   12.40
  -2   8   7  114.19   12.90
   2  -8   7   88.79   17.10
   2   8  -7   96.19   16.20
  -2   8   7  127.99    8.80
   2  -8  -8   53.19    7.00
  -2   8  -8   65.89   12.10
  -2  -8  -8   66.39    8.80
   2  -8   8   60.49    9.60
   2   8  -8   47.00   10.80
  -2  -8  -8   49.99    6.70
   2  -8   8   43.50   12.20
   2   8  -9  182.08   17.10
   2  -8   9  161.78   13.90
   2  -8   9  173.88   15.40
   2  -8 -10   11.60    3.30
  -2   8 -10    9.80    4.00
   2   8 -10   15.20    4.70
   2  -8  10   17.90    3.70
  -2  -8 -10   16.70    3.40
   2  -9   0   -1.60    5.70
   2   9   0    3.70    3.80
   2  -9   0    9.70    4.20
  -2   9   0    2.60    3.60
  -2  -9   0    3.00    5.30
   2  -9   0    3.10    3.60
   2  -9  -1  197.48   15.50
   2   9   1  213.18   15.00
   2  -9  -1  201.68   18.30
  -2   9  -1  220.18   15.00
   2  -9  -1  197.38   15.30
  -2  -9   1  217.78   17.30
  -2   9   1  217.68   14.60
   2   9  -1  208.08   15.30
  -2  -9  -1  186.28   17.80
   2  -9   1  195.38   15.00
  -2  -9  -1  203.88   15.40
   2  -9   1  212.18   18.00
   2  -9   1  198.38   15.00
   2  -9  -2  259.37   18.70
   2  -9  -2  250.07   21.90
   2  -9  -2  274.17   19.10
   2   9   2  253.47   17.80
  -2  -9   2  268.17   20.20
   2   9  -2  276.97   18.40
   2  -9   2  279.47   21.40
   2  -9   2  263.07   18.30
  -2   9   2  249.97   17.40
  -2  -9  -2  262.97   18.90
  -2  -9  -2  254.27   21.70
   2  -9   2  236.08   18.10
   2  -9  -3   13.50    7.70
   2   9   3   24.40    3.90
   2  -9  -3   15.00    9.00
  -2  -9   3   23.50    5.90
   2   9  -3   13.50    7.20
   2  -9   3   23.00    4.40
  -2  -9  -3   21.80    6.00
   2  -9   3   20.00    5.00
  -2   9   3   29.70    5.00
   2  -9   3   29.10    7.60
  -2  -9  -3   18.30    8.20
   2  -9   3   14.00    6.70
   2  -9  -4   16.80    5.40
  -2   9  -4   15.40    3.90
  -2   9  -4   15.00    8.50
   2  -9  -4   31.50    6.60
   2  -9  -4   23.00    8.40
  -2  -9   4   12.50    7.80
   2   9  -4   18.60    5.10
   2   9  -4   12.20    7.90
   2  -9   4   15.60    6.40
  -2  -9  -4   24.30    6.90
  -2   9   4   28.40    6.20
   2  -9   4   24.70    8.20
  -2  -9  -4   10.30    8.30
   2  -9  -5  177.68   14.00
  -2  -9   5  139.89   17.30
  -2   9  -5  154.38   19.20
   2  -9  -5  174.18   14.60
   2  -9  -5  169.78   13.40
  -2  -9  -5  176.08   15.20
   2   9  -5  144.09   18.10
   2   9  -5  175.18   13.00
  -2  -9  -5  132.79   18.10
   2  -9   5  150.48   19.40
  -2   9   5  173.68   14.30
   2  -9   5  142.19   13.60
   2  -9  -6  109.49   12.10
  -2   9  -6  101.59   17.60
   2  -9  -6  105.59   10.20
   2  -9  -6  120.89   11.20
  -2  -9   6  138.49   18.30
  -2   9   6  101.19   11.80
   2   9  -6   95.59   16.50
  -2  -9  -6  115.09   12.80
  -2  -9  -6  119.09   10.70
  -2  -9  -6  114.39   12.00
   2  -9  -7  138.49   11.70
  -2   9  -7  107.59   16.90
   2  -9  -7  124.79   10.90
  -2  -9  -7  113.49   10.40
   2  -9   7  116.99   13.50
  -2  -9  -7  144.69   12.00
  -2  -9  -7  108.89   12.40
   2   9  -7  124.59   17.00
   2  -9   7  109.19   12.80
  -2   9  -8   41.10    9.00
   2   9  -8   38.40    8.70
   2  -9   8   50.19    7.20
  -2  -9  -8   33.00    5.20
  -2  -9  -8   55.69    7.70
   2  -9   8   43.00    7.00
   2  -9  -9  164.28   11.90
  -2   9  -9  157.28   13.90
   2  -9   9  154.68   12.80
   2  -9   9  149.49   13.60
  -2  -9  -9  164.88   11.90
  -2 -10   0   24.90    5.30
  -2 -10   0   16.60    7.20
   2 -10   0   19.70    6.10
   2  10   0   29.70    5.60
   2 -10   0   15.20    7.40
  -2  10   0   20.10    4.90
   2 -10  -1 1061.39   68.79
   2  10  -1 1068.29   67.09
  -2 -10  -1  977.90   72.69
  -2 -10   2 1186.08   71.29
   2 -10  -2 1050.09   77.79
   2 -10   2 1143.69   72.19
  -2 -10  -2 1114.49   72.59
   2 -10   2 1113.69   68.99
   2  10  -2 1043.40   70.89
   2 -10   2 1094.89   68.89
   2 -10   2 1044.80   75.49
   2 -10  -3   46.50    7.60
  -2  10  -3   42.80    9.30
   2 -10  -3   42.20    9.80
   2 -10  -3   43.60    6.80
   2  10   3   45.90    6.50
  -2 -10   3   50.29    8.40
   2 -10   3   34.70    6.10
   2 -10   3   46.00    7.20
   2  10  -3   49.20    6.40
  -2 -10  -3   53.59    8.10
   2 -10   3   36.70    8.90
  -2 -10  -3   37.50   10.00
   2  10  -3   37.40    9.20
   2 -10  -4  194.58   21.10
  -2 -10   4  201.88   19.50
   2 -10  -4  261.37   17.60
   2 -10  -4  231.08   18.00
  -2  10  -4  244.08   21.60
   2 -10   4  222.78   16.80
   2  10  -4  197.98   20.70
  -2 -10  -4  197.78   21.20
   2  10  -4  247.78   16.70
   2 -10   4  212.48   17.10
   2 -10   4  214.48   21.30
  -2 -10  -4  240.68   18.20
  -2 -10   5 1192.38   74.09
   2 -10  -5 1227.68   69.89
   2 -10   5 1074.89   70.09
   2 -10   5 1020.20   74.89
   2 -10   5 1093.29   70.39
   2  10  -5 1064.19   72.49
  -2  10  -6   95.39   14.70
   2 -10  -6   83.99    8.70
   2 -10  -6  108.19   11.10
   2  10  -6   80.89   14.30
  -2 -10  -6  102.29   10.50
  -2 -10  -6  103.09   11.30
   2 -10   6   92.59   11.20
   2 -10   6   93.99   11.20
   2 -10  -7  448.06   29.50
   2 -10  -7  457.25   29.80
  -2  10  -7  474.95   31.90
  -2 -10  -7  496.25   29.40
   2 -10   7  427.56   30.20
   2 -10   7  436.26   29.80
  -2 -10  -7  427.36   29.20
   2  10  -7  387.46   31.80
  -2  10  -8    1.90    5.40
   2 -10  -8   10.20    3.50
   2  10  -8    4.60    5.50
   2 -10   8   10.70    3.60
   2 -10   8    6.50    4.40
  -2 -11   0    5.00    4.70
  -2 -11   0    1.40    6.50
   2 -11   0    4.00    7.30
   2 -11   0    9.10    5.20
  -2  11   0    6.90    4.20
   2 -11   0    2.70    4.70
   2  11   0    7.50    6.30
   2  11   0   -1.00    4.30
   2 -11  -1  656.23   41.50
  -2 -11   1  669.93   41.20
  -2 -11   1  679.43   44.20
   2 -11  -1  618.44   44.90
   2 -11  -1  657.33   41.40
   2 -11   1  549.15   44.40
   2 -11   1  634.54   41.30
   2 -11   1  680.83   45.10
  -2 -11  -1  650.03   41.50
   2 -11   1  598.74   41.10
   2  11  -1  618.94   43.00
  -2 -11  -1  636.04   44.70
   2 -11  -2   14.10    5.40
  -2  11  -2   18.60    7.80
  -2 -11   2   13.70    4.00
   2 -11  -2   13.00    5.90
   2 -11  -2    1.90    7.70
  -2 -11   2   14.80    6.50
   2  11   2    7.90    3.90
   2 -11   2   14.10    4.60
  -2 -11  -2   15.50    6.00
  -2 -11  -2    2.10    7.20
   2 -11   2    8.30    4.90
   2 -11   2    7.90    6.70
   2  11  -2   11.40    5.40
   2  11  -2    0.70    6.80
   2 -11  -3    9.50    5.40
  -2 -11   3    4.50    8.40
  -2  11  -3   -0.40    6.90
   2  11   3    0.80    3.40
   2 -11  -3   -8.00    6.70
   2 -11  -3    3.30    6.10
  -2 -11  -3   -1.50    6.80
   2  11  -3   -1.40    7.00
   2 -11   3    6.00    4.70
   2 -11   3    0.20   10.60
   2 -11   3    2.50    4.00
  -2 -11  -3   -1.00    6.10
   2  11  -3    5.50    4.70
   2 -11  -4   77.79   10.30
  -2  11  -4   91.09   12.10
   2 -11  -4   82.39   10.80
   2  11  -4   96.59    9.10
   2 -11   4   70.59    9.40
   2 -11   4   77.39    9.00
  -2 -11  -4   72.89   10.30
  -2 -11  -4   89.49   11.20
  -2  11  -5   -7.70    7.20
   2 -11  -5   -0.50    5.50
   2 -11  -5    1.70    4.00
   2 -11   5   -2.90    4.40
  -2 -11  -5   -3.20    4.30
   2 -11   5    3.00    4.10
  -2 -11  -5   -1.00    5.60
   2  11  -5   -4.10    6.60
  -2  11  -6   -5.50    5.70
   2 -11  -6    3.00    4.30
   2 -11  -6   -0.10    4.30
   2  11  -6   -9.60    5.60
  -2 -11  -6   -1.30    3.60
  -2 -11  -6   -5.80    4.70
   2 -11   6    2.80    3.90
   2 -11   6   -5.20    3.80
   2 -11  -7    8.10    4.30
   2 -11   7   10.00    3.80
  -2 -11  -7    9.60    3.80
   2  11  -7    1.40    5.40
   2 -11   7   10.60    3.80
  -2 -11  -7   12.80    3.50
  -2 -12   0  876.11   55.59
  -2 -12   0  918.81   55.79
   2  12   0  845.12   56.89
   2  12   1    4.20    4.30
   2 -12  -1   10.90    6.00
   2 -12  -1    6.80    4.90
   2  12   1    6.90    5.40
  -2 -12   1    7.00    3.90
  -2 -12   1    7.70    4.50
  -2  12  -1    6.10    6.60
   2  12  -1    6.10    5.90
  -2 -12  -1    8.60    4.60
   2  12  -1    8.10    4.50
   2 -12   1   14.50    5.20
  -2 -12  -1    8.50    5.30
   2 -12   1    8.80    4.70
  -2 -12   2 1540.15   93.49
  -2 -12   2 1474.85   93.39
   2  12   3  189.08   13.60
  -2  12  -3  207.38   17.60
   2 -12  -3  226.98   16.00
   2 -12  -3  203.98   15.30
  -2 -12   3  178.28   14.40
   2  12  -3  169.28   17.60
  -2 -12  -3  184.18   15.20
   2  12  -3  205.98   14.50
   2 -12   3  187.88   15.20
  -2 -12  -3  187.78   15.90
   2 -12   3  198.98   14.80
  -2 -12   4  323.27   24.20
   2 -12  -4  382.06   25.00
  -2  12  -4  401.46   27.30
   2 -12  -4  363.36   24.40
  -2 -12  -4  361.66   24.60
   2 -12   4  359.56   24.60
   2  12  -4  363.66   27.00
   2 -12   4  384.56   24.90
  -2 -12  -4  367.66   25.10
   2 -12  -5    4.50    4.60
  -2  12  -5    1.90    5.70
   2 -12   5    5.00    3.50
  -2 -12  -5   -0.60    3.60
  -2 -12  -5    4.90    4.30
   2 -12   5    4.10    4.00
   2  12  -5    6.40    7.70
   2 -12  -6  999.80   61.69
   2 -12  -6 1074.49   62.49
   2 -12   6  929.61   62.59
   2  12  -6  965.00   63.29
   2 -12   6 1073.39   62.29
  -2 -12  -6  966.50   61.59
   2  13   0    2.20    4.80
  -2  13   0    1.20    5.00
   2 -13   0    5.20    4.00
  -2 -13   0   -0.40    5.70
   2 -13   0    1.00    4.50
   2  13   0    6.40    3.80
  -2 -13   0    1.70    3.70
   2  13   1   32.00    6.30
  -2 -13   1   45.00    7.20
   2 -13  -1   51.99    8.10
   2 -13  -1   34.90    5.40
   2  13   1   42.60    6.00
  -2  13  -1   37.10    7.60
  -2 -13  -1   39.70    5.50
  -2 -13  -1   45.60    6.10
   2 -13   1   32.10    5.20
   2  13  -1   37.80    5.10
  -2  13   1   45.40    7.30
   2 -13   1   33.70    5.70
   2  13  -1   26.20    6.10
  -2 -13   2  109.59   10.40
   2 -13  -2  124.69   10.80
   2 -13  -2  131.49   11.30
  -2 -13   2  119.69   10.20
  -2  13  -2  122.69   13.30
   2 -13   2  137.59   11.50
  -2 -13  -2  120.39   11.20
  -2 -13  -2  118.09   10.80
   2 -13   2  117.99   10.90
   2  13  -2  109.09   12.90
   2 -13  -3    6.00    4.20
  -2 -13   3   -1.80    3.90
  -2  13  -3    0.60    5.40
   2 -13  -3    4.70    4.40
   2  13   3    2.70    3.80
  -2 -13   3    1.70    3.00
   2  13  -3    4.60    5.40
   2 -13   3    5.10    3.70
  -2 -13  -3    5.30    3.80
   2 -13   3    2.60    3.40
  -2  13  -4   -0.30    4.80
  -2 -13   4    2.00    2.90
   2 -13  -4    4.50    3.70
   2 -13  -4    1.90    2.80
   2  13   4    1.10    3.20
  -2 -13  -4    5.10    3.90
   2 -13   4    3.40    3.00
   2  13  -4    0.00    4.60
  -2 -13  -4    4.80    3.30
   2 -13   4    2.80    3.60
   2 -13  -5    8.50    3.00
  -2  13  -5    9.40    4.50
  -2 -13  -5   14.20    2.70
   2 -13   5   11.20    3.00
   2  13  -5   11.10    4.30
  -2 -13  -5    9.50    3.30
   2 -13   5   13.90    3.00
   2  14   0  181.78   14.30
  -2  14   0  220.88   15.50
  -2 -14   0  187.48   13.60
  -2 -14   0  193.28   13.60
   2 -14   0  190.88   13.80
   2 -14   0  182.38   13.70
  -2  14  -1  303.97   20.50
  -2 -14   1  285.27   18.80
   2 -14  -1  258.57   19.00
   2  14   1  256.87   19.20
   2 -14  -1  295.57   19.00
  -2 -14  -1  289.47   18.90
   2 -14   1  286.77   19.00
   2  14  -1  269.57   19.70
  -2 -14  -1  287.07   19.00
   2 -14   1  290.27   19.00
   2 -14  -2  142.59   11.10
  -2 -14   2  160.88   11.30
   2 -14  -2  152.58   11.50
  -2  14  -2  174.38   13.20
  -2 -14  -2  153.08   11.50
   2 -14   2  152.18   11.40
  -2  14   2  170.78   12.60
   2 -14   2  157.58   11.50
  -2 -14  -2  148.09   11.30
   2  14  -2  148.29   12.30
  -2  14  -3  112.89    9.70
   2 -14  -3   91.79    7.70
   2 -14  -3  101.69    8.30
   2  14   3   92.29    7.90
  -2 -14   3   93.49    7.80
  -2 -14  -3  108.89    8.20
  -2  14   3  116.69    9.30
   2 -14   3  113.99    8.90
  -2 -14  -3  106.89    8.40
   2 -14   3  113.59    8.20
   3   0   0    1.30    0.90
   3   0   0    2.90    1.00
   3   0  -1   13.60    1.10
   3   0   2 1658.33  101.29
   3   0  -3    3.00    1.10
   3   0   3    1.30    1.60
  -3   0   3    2.20    1.30
  -3   0  -3    1.40    2.10
   3   0   3   -0.10    2.30
   3   0  -3    1.70    1.80
  -3   0   3    0.50    1.20
   3   0   3    0.50    2.40
  -3   0   4   65.99    5.50
   3   0   4   67.79    7.30
   3   0   4   65.09    7.30
  -3   0   4   62.89    5.60
   3   0  -4   57.89    4.70
   3   0   4   59.79    5.60
  -3   0  -4   69.89    6.70
   3   0  -5   -0.60    1.90
   3   0   5   -1.60    3.80
   3   0   5   -2.00    4.00
  -3   0   5    5.30    2.70
   3   0  -5    1.00    2.10
   3   0   5   -0.70    3.50
  -3   0   5    1.70    2.50
   3   0  -6  580.84   40.10
  -3   0   6  630.44   41.50
   3   0   6  728.23   44.00
  -3   0   6  625.84   41.80
   3   0   6  681.13   43.90
   3   0   7   -4.30    5.90
  -3   0   7    1.30    4.30
   3   0   7   -0.90    4.90
  -3   0   7   -4.50    3.80
  -3   0  -7    6.50    4.30
   3   0   7   -2.00    6.10
   3   0  -7    4.30    2.70
   3   0  -7    2.60    3.80
  -3   0  -8    6.40    5.10
  -3   0  -8   -0.90    6.00
   3   0   8   -8.10    7.00
   3   0  -8    2.30    4.90
  -3   0   8   -0.40    5.10
   3   0   8   -1.00    5.70
   3   0   8   13.60    6.20
   3   0  -8   -0.30    3.90
  -3   0   8    2.70    5.40
   3   0   8    1.60    7.50
   3   0  -9   -5.50    4.00
  -3   0  -9   -3.80    7.30
  -3   0   9    7.50    4.40
   3   0  -9    4.00    3.40
  -3   0  -9   -7.80    5.30
   3   0   9   -1.50    8.70
   3   0   9   16.80    7.10
   3   0   9    6.10    7.50
  -3   0   9    0.30    5.80
  -3   0 -10  544.85   41.40
  -3   0  10  516.65   35.20
   3   0  10  516.35   37.50
   3   0 -10  535.85   33.30
  -3   0 -10  569.14   35.70
  -3   0  11    0.10    4.70
  -3   0 -11   -8.10    3.60
  -3   0  12  353.06   25.30
   3   0  12  439.96   26.80
   3  -1   0   21.30    2.60
   3   1   0   23.30    1.80
   3   1   0   22.20    1.60
  -3  -1   0   23.00    1.90
   3  -1   0   22.20    2.40
  -3   1  -1   97.19    7.90
   3  -1  -1  113.09    7.20
   3   1   1  120.99    7.30
  -3   1   1   98.59    7.40
  -3   1   1  100.89    7.40
   3  -1   1  121.49    8.40
  -3  -1  -1  120.19    7.90
   3   1  -1  109.19    6.90
   3  -1   1  118.99    8.10
  -3   1  -2 4624.24  308.37
  -3  -1  -2 5375.26  308.77
   3  -1  -3 1299.87   73.39
   3   1   3 1177.28   73.59
   3   1  -3 1217.08   72.99
   3  -1   3 1105.49   73.69
   3   1  -3 1189.18   72.99
   3   1   4 2963.40  176.98
   3   1  -4 2927.41  176.28
   3  -1   4 2798.72  177.08
  -3  -1   5  346.87   24.10
  -3  -1   5  368.16   24.00
   3   1   5  336.97   24.10
   3  -1  -5  361.36   23.40
   3   1   5  413.06   26.20
  -3   1   5  383.46   24.70
   3  -1   5  390.66   26.50
  -3  -1  -5  361.26   25.40
   3   1  -5  340.57   22.90
   3  -1   5  364.26   26.30
  -3   1   5  383.96   24.50
   3   1   6   48.90    8.40
   3  -1  -6   43.40    5.30
  -3  -1   6   41.70    6.10
  -3  -1   6   45.60    6.20
   3   1   6   56.59    8.70
   3   1  -6   34.80    4.90
  -3   1   6   44.70    6.50
   3  -1   6   47.90    8.60
   3  -1   6   39.50    8.10
   3   1  -6   39.90    4.50
  -3   1   6   49.80    6.70
  -3  -1   7 2190.58  140.49
   3   1  -7 2093.89  138.29
   3  -1   7 2524.55  143.79
   3   1   8 1020.30   64.49
  -3   1  -8  973.20   59.79
   3  -1  -8  893.51   57.69
   3   1   8  892.81   62.19
   3   1   8  871.91   62.49
  -3  -1   8  836.22   59.49
   3  -1   8  971.40   59.69
   3  -1   8 1045.50   64.39
  -3   1   8  862.81   59.79
  -3  -1  -8  856.41   59.19
   3  -1   8  922.41   59.79
  -3   1   8  823.72   60.19
   3  -1   8  912.61   63.69
   3   1  -8  934.51   56.89
  -3   1   8  979.80   57.99
  -3  -1   9  120.29   11.00
   3   1   9  113.69   16.70
  -3   1  -9  108.49   13.10
  -3   1  -9  100.99   11.60
   3  -1  -9  104.49    9.60
  -3  -1   9   91.39   12.30
   3  -1  -9   98.29   10.20
   3   1   9  106.69   16.00
   3  -1   9  130.09   14.40
   3  -1   9  106.49   15.50
   3  -1   9  130.99   18.60
  -3   1   9  102.09   13.10
  -3   1   9  105.89   13.50
   3   1  -9  109.29    8.00
  -3  -1  -9   88.09   13.30
  -3  -1  -9   87.29   12.00
  -3   1   9  104.09   10.60
   3  -1   9   79.09   15.10
   3  -1 -10  142.29   10.50
  -3  -1  10  148.19   12.70
  -3   1 -10  147.19   12.60
  -3   1  10  123.89   12.30
   3  -1  10   99.99   17.10
  -3  -1 -10  113.29   13.30
   3   1  11  549.45   34.20
  -3  -1  11  446.26   32.60
  -3   1  11  524.85   32.60
   3  -1  11  518.25   35.70
  -3  -1 -11  475.45   32.60
   3   1  12  296.17   18.90
  -3  -1  12  249.38   18.60
   3  -1  12  285.37   20.10
  -3   1  12  251.77   17.90
  -3   2   0    2.90    1.30
   3   2   0    2.20    0.80
  -3  -2   0    0.30    0.70
   3  -2   0    1.40    1.30
  -3  -2   0    0.90    0.60
  -3   2   0    1.90    1.30
  -3   2  -1    2.70    1.70
   3   2   1    4.80    1.30
   3  -2  -1    5.10    1.30
   3   2   1    5.60    1.70
   3  -2  -1    7.80    1.80
   3   2   1    7.40    1.30
   3  -2   1    9.50    2.10
  -3   2   1    2.10    1.20
   3  -2   1    3.60    2.10
   3  -2   1    6.90    1.90
  -3  -2  -1    3.70    1.50
   3  -2  -2  770.22   47.60
   3   2   2  777.52   47.70
   3  -2  -3  402.36   25.10
   3   2   3  397.56   25.30
  -3   2   3  386.86   25.60
  -3  -2  -3  429.56   26.60
   3  -2   3  377.16   27.10
   3  -2  -4  873.71   50.99
  -3  -2   4  857.11   51.09
  -3  -2   4  847.82   51.09
   3   2  -4  809.12   50.29
   3   2  -4  800.22   50.19
   3  -2   4  736.73   52.99
   3  -2  -5  616.44   39.00
   3   2   5  706.73   41.50
   3   2   5  616.54   39.50
  -3  -2   5  566.04   39.40
  -3  -2  -5  702.73   41.70
   3   2  -5  588.44   38.10
   3  -2   5  592.44   42.00
   3   2  -5  561.34   38.20
  -3   2   5  648.74   40.10
  -3   2   5  646.54   40.30
   3   2   6    8.40    5.50
  -3  -2   6    8.80    3.20
  -3  -2   6    6.50    3.30
   3   2   6    4.30    5.90
   3  -2  -6    6.70    3.50
   3   2   6    2.60    4.40
  -3   2   6    7.60    4.30
   3   2  -6    4.60    2.20
   3  -2   6   -3.90    5.30
   3   2  -6    4.60    2.00
  -3   2   6    5.70    4.30
   3  -2   6    1.70    6.20
  -3  -2   7   26.70    5.90
   3  -2  -7   26.60    4.50
   3   2   7   37.80    8.60
   3   2   7   22.90    8.10
   3   2   7   33.60    6.20
  -3   2  -7   28.80    5.50
   3  -2  -7   20.80    5.20
   3   2  -7   31.70    3.50
   3   2  -7   26.10    3.80
  -3  -2  -7   34.30    5.70
  -3   2   7   24.90    6.50
   3  -2   7   20.40    9.40
   3  -2   7   28.50    9.50
  -3   2   7   29.30    6.60
   3   2  -7   29.00    6.20
   3   2  -7   24.80    3.80
  -3  -2  -7   35.80    7.00
   3   2   8  108.29   14.80
  -3   2  -8  111.89   11.20
   3   2   8   95.79   11.90
   3   2   8   85.69   19.40
  -3  -2   8  100.49   11.40
   3  -2  -8   91.29    9.50
   3  -2  -8   90.29   10.70
  -3   2  -8  132.49   14.20
   3   2  -8  113.19   12.50
  -3   2   8   88.19   12.70
   3   2  -8  101.29    7.30
  -3  -2  -8   97.79   11.30
  -3   2   8  105.39   12.40
   3  -2   8  109.79   16.60
   3  -2   8  124.99   17.50
   3  -2   8  116.79   13.80
  -3  -2  -8   98.29   11.70
   3   2   9   -5.30    7.40
  -3   2  -9   22.50    7.60
  -3  -2   9    8.00    6.00
   3  -2  -9   -0.50    5.30
   3   2   9   13.80    8.60
  -3   2  -9    2.30    6.20
  -3  -2   9   14.70    4.50
  -3   2  -9    9.00    5.20
   3  -2  -9    6.00    4.50
  -3   2   9    8.80    6.70
   3  -2   9   -9.70    7.80
   3  -2   9   14.00    8.50
   3  -2   9    7.60    9.00
   3   2  -9   19.20    7.40
  -3  -2  -9   -1.70    6.10
  -3   2   9    7.70    6.80
   3  -2   9   -4.70    9.30
  -3   2   9    3.30    4.70
  -3  -2  -9    2.70    7.60
   3  -2 -10  309.77   22.20
   3  -2 -10  316.37   21.70
  -3   2 -10  363.06   22.10
  -3  -2  10  306.77   22.70
  -3   2 -10  326.97   22.20
  -3   2  10  342.37   22.40
  -3  -2 -10  307.67   25.30
  -3  -2 -10  300.77   23.60
   3  -2 -11   32.90    3.90
   3   2  11   24.00    6.30
  -3  -2  11   37.20    5.40
   3  -2  11   21.00   14.60
  -3  -2 -11   22.70    5.70
  -3   2  11   34.20    5.20
   3  -3   0 3078.69  187.48
  -3   3  -1  453.15   28.10
   3  -3  -1  451.25   27.30
   3  -3   1  406.96   27.90
   3   3   2   63.69    4.70
   3   3   2   57.19    5.30
  -3   3   2   47.30    5.20
  -3  -3  -2   55.39    5.80
   3  -3   2   54.39    5.70
   3  -3   2   64.49    6.00
  -3   3  -3 4724.43  303.47
  -3   3   3 5133.09  301.57
  -3  -3  -3 4637.84  301.97
   3   3   4 5192.78  305.07
  -3   3  -4 4820.72  304.87
   3   3   5 1080.49   65.09
   3  -3  -5  940.41   62.89
  -3  -3  -5  988.80   65.39
   3  -3   5 1059.59   67.79
   3   3   6  809.22   53.89
   3  -3  -6  757.82   51.39
   3   3   6  868.91   51.69
  -3   3  -6  893.81   53.29
   3   3   6  874.31   54.29
   3  -3  -6  775.22   50.99
  -3   3  -6  864.71   51.79
  -3   3   6  852.41   52.89
   3   3  -6  745.53   52.39
  -3  -3  -6  815.32   51.59
  -3   3   6  811.42   52.89
   3  -3   6  756.72   56.19
   3  -3   6  913.71   57.69
  -3  -3  -6  715.73   51.79
  -3   3  -7   11.00    4.70
   3   3   7   16.60    5.20
   3  -3  -7    9.50    5.20
   3   3   7    4.90    6.50
   3  -3  -7   15.50    4.40
  -3   3  -7   20.70    6.60
  -3  -3   7    9.40    4.60
   3   3   7    6.30    7.20
   3  -3   7   12.10   10.10
   3  -3   7    0.50    6.30
  -3   3   7   11.00    6.00
   3  -3   7   11.80    9.20
   3   3  -7   17.60    6.00
  -3  -3  -7   14.70    4.50
  -3   3   7    9.70    5.60
  -3   3   7   16.30    3.90
  -3  -3  -7    9.60    4.50
   3   3   8  622.84   41.80
   3  -3  -8  644.84   41.60
   3   3   8  631.64   45.60
   3  -3  -8  643.54   40.90
   3   3   8  600.84   45.10
  -3  -3   8  594.34   43.70
   3  -3   8  654.13   45.00
  -3   3   8  580.04   43.60
  -3  -3  -8  626.64   41.70
  -3   3   8  627.64   40.90
   3  -3   8  730.33   45.40
   3   3  -8  623.14   43.50
  -3  -3  -8  639.74   42.70
   3  -3   8  697.43   50.59
   3  -3   8  767.92   61.79
  -3   3  -9    0.40    4.40
  -3  -3   9    7.00    5.50
   3   3   9   -0.20    7.20
   3  -3  -9    6.10    4.90
  -3   3  -9    5.80    5.50
  -3   3  -9    7.10    7.90
   3  -3  -9   -3.20    5.50
  -3   3   9    3.20    6.30
  -3   3   9   -4.10    4.20
   3  -3   9   -4.00    8.50
   3   3  -9    1.30    6.70
  -3  -3  -9    1.10    8.20
   3  -3   9   -2.50   10.00
  -3  -3  -9   -3.10    5.60
   3  -3   9  -16.60    7.20
   3   3  10  837.82   52.09
  -3  -3  10  759.42   51.99
  -3   3  10  859.31   51.49
   3  -3  10  863.11   56.09
  -3  -3 -10  762.72   52.39
  -3  -3  11   11.30    4.00
   3  -3 -11   12.90    3.20
   3   3  11   10.70    4.60
  -3   3  11   13.10    5.70
   3  -3  11   -1.30    7.70
   3  -4   0    3.00    2.30
  -3  -4   0    4.70    1.80
  -3   4   0    1.80    1.80
  -3   4   0    3.00    2.00
   3  -4   0    2.30    2.00
  -3   4  -1  414.06   28.60
   3  -4  -1  460.15   27.70
   3   4   2    2.90    2.20
   3  -4  -2    7.30    3.00
  -3  -4  -2    4.60    2.10
  -3   4   2    3.00    2.20
  -3  -4  -2    1.70    2.70
   3  -4   2    6.40    2.80
  -3   4   2    1.10    2.30
   3  -4   2    5.90    2.60
   3  -4  -3  265.47   19.50
   3   4   3  306.57   20.50
  -3   4  -3  293.77   20.00
   3  -4  -3  333.07   20.90
   3   4   3  292.77   20.50
  -3   4   3  281.47   20.20
   3  -4   3  323.67   21.70
   3  -4   3  305.87   21.50
  -3   4   3  283.77   20.10
  -3  -4  -3  314.47   19.90
  -3  -4  -3  327.47   21.60
   3  -4  -4   91.69    8.80
  -3   4  -4   79.99    8.30
  -3  -4   4   93.89    6.60
   3   4   4   96.09    9.60
   3   4   4   84.69    8.80
   3  -4  -4   94.89    7.80
  -3  -4   4  107.39    8.90
  -3   4   4   88.79    8.30
   3  -4   4   79.89   11.20
  -3  -4  -4   90.89    8.00
  -3  -4  -4  106.29   10.60
   3  -4  -5   34.60    5.30
   3   4   5   30.20    6.30
   3   4   5   32.80    7.00
  -3  -4  -5   30.20    5.20
  -3  -4  -5   35.50    7.70
  -3   4   5   20.20    5.60
   3  -4   5   15.80    7.70
  -3   4   5   36.50    5.80
   3  -4   5   25.30    9.80
  -3   4  -6  102.59   12.90
   3   4   6   66.99    8.00
   3   4   6   73.49   10.60
   3  -4  -6   68.19    7.70
   3   4   6   80.29   10.90
  -3   4  -6   82.49    8.80
  -3  -4   6   84.89    8.70
   3  -4  -6   85.39    8.90
  -3   4   6   78.99    7.50
   3  -4   6   82.79   15.80
  -3   4   6   73.79   10.10
   3   4  -6   86.69   10.60
   3  -4   6   54.89   13.20
  -3  -4  -6   73.99    8.80
  -3  -4  -6   73.09    7.70
  -3   4   6   86.19    9.80
  -3  -4  -6   69.19    8.90
   3   4   7  327.77   25.70
   3   4   7  342.37   26.60
   3   4   7  306.17   22.30
  -3  -4   7  337.27   23.30
   3  -4  -7  311.97   22.00
   3  -4  -7  345.77   21.60
   3  -4  -7  293.77   22.40
  -3   4   7  321.47   24.20
   3   4  -7  332.97   25.00
   3  -4   7  297.67   25.40
  -3  -4  -7  318.47   23.70
  -3  -4  -7  328.57   22.60
  -3   4   7  294.77   24.30
  -3  -4  -7  314.97   22.50
   3  -4   7  388.96   32.70
  -3   4   7  306.67   21.60
   3  -4   7  387.56   32.90
  -3   4  -8  224.38   20.80
  -3  -4   8  169.28   15.70
  -3   4  -8  207.08   14.50
   3  -4  -8  190.48   15.70
   3   4   8  147.29   19.60
   3  -4  -8  173.68   14.60
  -3  -4  -8  179.38   13.50
   3  -4   8  212.38   24.60
   3  -4   8  197.68   20.00
  -3   4   8  178.68   16.90
  -3   4   8  190.58   17.90
   3   4  -8  172.08   18.30
  -3   4   8  177.58   14.30
  -3  -4  -8  180.38   15.50
  -3  -4  -8  177.48   17.00
   3  -4   8  208.98   25.10
   3   4   9   16.70    9.60
  -3   4  -9   29.70    4.40
   3   4   9   17.10    5.90
  -3   4  -9   30.30    4.50
  -3   4  -9   30.00    5.10
   3  -4  -9   26.90    7.50
  -3   4  -9   29.00    9.10
  -3  -4   9   19.70    6.30
   3  -4  -9   15.50    5.50
   3  -4   9   14.30   11.80
  -3   4   9   34.40    8.60
  -3  -4  -9   20.20    8.40
  -3   4   9   24.00    7.00
   3   4  -9   25.60    8.70
   3  -4   9   28.40   10.20
   3  -4   9   13.90   10.20
  -3   4   9   18.30    5.20
  -3  -4  -9   11.40    6.10
  -3   4 -10   86.89   14.60
  -3  -4  10  107.29    9.90
   3   4  10   74.99   10.30
   3  -4  10   98.79   14.10
   3  -4  10  113.29   15.20
   3   4 -10  125.49   16.00
  -3   4  10  101.49    9.60
   3  -4 -11   -1.70    3.10
   3   4  11   -4.40    2.60
   3  -4  11  -13.40    5.90
  -3   4  11   -2.20    3.10
  -3  -4 -11  -10.50    4.40
   3  -5  -1  590.64   37.10
   3  -5  -2 1639.04  100.69
   3  -5  -3 1265.07   80.89
  -3   5  -3 1313.47   81.19
   3  -5   3 1318.17   82.69
   3  -5   3 1337.17   82.69
  -3  -5  -3 1318.17   81.19
  -3  -5   4 1573.64   96.09
   3  -5  -4 1677.03   97.09
   3  -5  -4 1523.15   95.49
   3  -5   4 1344.27   98.29
   3  -5   4 1389.76   98.49
  -3  -5  -4 1735.13   95.99
   3   5   5 2367.16  141.39
   3  -5   5 2163.68  145.69
   3  -5  -6  942.31   59.39
   3  -5  -6 1033.00   58.39
   3   5   6  871.21   61.29
  -3   5  -6 1040.10   59.19
   3  -5  -6  870.11   58.59
   3  -5   6  972.10   68.69
  -3  -5  -6  899.91   58.99
   3  -5   6  915.91   68.29
  -3  -5  -6  951.00   59.49
  -3   5   6  935.31   60.49
  -3   5   6  949.01   60.69
   3   5  -6  940.51   61.29
  -3   5   6  862.71   58.19
  -3  -5  -6  935.21   59.99
  -3   5  -7  239.28   21.10
   3  -5  -7  217.88   18.70
   3  -5  -7  243.58   18.10
  -3  -5   7  239.38   18.80
  -3   5  -7  269.47   23.40
  -3   5   7  257.77   19.80
   3  -5   7  235.28   28.10
  -3   5   7  241.58   17.20
  -3  -5  -7  245.38   19.90
  -3  -5  -7  257.17   18.60
   3  -5   7  242.08   29.50
   3   5  -7  229.58   21.00
  -3   5  -8  721.03   43.70
   3  -5  -8  650.13   45.50
   3  -5  -8  688.73   44.70
  -3   5  -8  773.02   43.70
   3   5   8  664.93   48.70
   3   5   8  664.63   44.30
  -3  -5   8  625.94   45.70
   3  -5   8  753.42   56.49
  -3   5   8  658.13   46.90
   3  -5   8  724.23   49.10
  -3   5   8  690.33   44.10
   3   5  -8  696.13   48.40
   3  -5   8  615.44   49.30
  -3   5   8  763.82   47.80
  -3  -5  -8  729.33   45.30
  -3  -5  -8  679.03   44.30
  -3  -5  -8  743.33   46.90
   3   5   9  704.93   44.10
   3  -5  -9  785.32   49.90
   3  -5  -9  635.74   44.60
  -3   5  -9  764.12   49.40
  -3   5   9  690.43   44.10
   3  -5   9  756.52   49.00
   3  -5   9  687.13   49.90
   3   5  -9  639.84   48.00
  -3  -5  -9  677.63   45.30
  -3  -5  -9  657.73   47.10
   3  -5 -10  259.87   18.50
  -3  -5  10  262.27   18.30
  -3   5 -10  277.27   22.60
  -3  -5 -10  260.97   19.40
   3  -5  10  234.68   23.60
   3   5 -10  289.67   22.40
   3  -5  10  238.98   24.30
   3  -5 -11  335.47   22.20
  -3  -5  11  356.16   22.40
   3  -5  11  309.57   24.50
  -3  -5 -11  368.76   23.10
  -3   6   0    0.00    2.70
  -3  -6   0    1.60    2.80
   3  -6   0    3.60    3.50
   3  -6   0   -2.00    3.70
   3  -6  -1  737.33   47.50
  -3  -6   2    8.70    2.80
   3  -6  -2    5.30    4.00
  -3  -6   2    4.50    2.30
   3  -6  -2    3.00    3.00
   3   6   2    3.90    2.20
  -3   6   2    9.60    3.20
  -3   6   2   11.10    3.40
  -3  -6  -2    5.10    4.10
   3  -6   2    9.50    4.00
  -3  -6   3   63.09    5.80
   3   6   3   51.49    6.60
   3  -6  -3   73.89    8.80
   3  -6  -3   70.59    6.90
   3  -6   3   58.99    8.50
  -3   6   3   66.09    7.70
  -3  -6  -3   71.59    9.40
   3  -6   3   68.59    8.70
  -3   6   3   57.09    7.10
   3   6   4  238.08   20.70
   3  -6  -4  304.37   19.00
   3  -6  -4  288.07   21.60
  -3  -6   4  245.38   19.90
  -3   6  -4  268.27   22.60
   3  -6  -4  302.87   20.10
   3  -6  -4  319.07   19.30
   3  -6   4  252.57   22.90
  -3  -6  -4  300.17   22.80
  -3   6   4  294.57   20.50
  -3  -6  -4  276.37   19.70
  -3   6   4  257.97   20.20
   3  -6   4  224.68   26.00
  -3   6   4  296.87   18.50
   3   6  -4  319.87   22.40
  -3   6  -5  789.22   53.29
   3   6   5  672.83   50.29
   3  -6  -5  780.12   48.70
   3  -6  -5  794.82   49.70
  -3   6  -5  792.72   49.20
   3  -6  -5  855.81   48.50
   3   6  -5  759.42   48.70
  -3  -6  -5  786.72   52.89
  -3   6   5  810.62   50.39
   3   6  -5  792.12   51.59
  -3  -6  -5  786.72   49.60
  -3   6   5  725.23   50.09
   3  -6   5  677.73   55.39
  -3  -6  -5  764.62   49.99
  -3   6  -6   -0.80    8.40
   3  -6  -6    0.50    4.10
   3   6   6   -9.30    6.50
   3  -6  -6    6.20    4.20
  -3  -6   6   -0.40    4.80
   3  -6  -6   -2.00    5.20
   3   6   6    0.00    2.80
  -3   6  -6   -0.70    4.00
  -3   6  -6   -0.90    4.30
  -3  -6  -6   -1.60    6.30
   3  -6   6  -17.60   10.10
  -3  -6  -6    3.70    6.10
  -3  -6  -6   -2.50    5.60
  -3   6   6   -0.50    3.50
   3  -6   6    4.90   10.30
  -3  -6  -6    8.00    4.00
  -3   6   6   -4.50    5.70
   3   6  -6   -6.50    3.20
  -3   6   6   -0.70    5.10
   3   6  -6   -1.00    6.50
  -3  -6   7  107.19   11.00
   3  -6  -7  107.89   11.20
   3  -6  -7   92.29    8.90
  -3   6  -7   96.09   15.20
  -3   6  -7  116.59    9.00
   3  -6  -7  102.39   10.10
   3  -6   7   81.39   19.00
   3   6  -7   97.29   15.30
  -3  -6  -7  106.39   12.70
  -3   6   7   80.19   11.20
   3  -6   7   93.29   14.60
  -3  -6  -7   98.29   10.90
  -3  -6  -7   81.39   11.90
   3  -6   7   71.69   12.30
   3   6   8  118.49   18.80
   3   6   8  102.79   10.10
  -3   6  -8  121.99   16.60
   3  -6  -8  134.29   12.10
  -3  -6   8  133.09   15.30
   3  -6  -8  114.09   13.30
  -3  -6  -8  114.89   11.90
  -3   6   8  140.19   11.10
  -3  -6  -8  158.88   16.20
   3  -6   8   96.39   14.70
   3   6  -8  130.89   17.30
  -3   6   8  140.19   16.50
  -3  -6  -8  123.79   12.80
   3  -6   8  163.38   24.00
   3  -6  -9   78.29    9.50
  -3   6  -9   51.69   10.90
   3   6   9   56.49    5.90
   3  -6   9   54.39   11.30
   3   6  -9   57.49   10.40
  -3  -6  -9   76.79   10.10
   3  -6   9   88.59   12.70
  -3   6 -10  133.69   17.10
   3  -6 -10  118.69   11.60
   3   6 -10  113.49   13.70
   3  -6  10   92.49   12.40
  -3  -6 -10  121.99   14.10
  -3   6  10  132.19    9.60
   3  -6 -11   -3.30    2.70
  -3  -6 -11   -1.80    3.10
   3  -6  11   -4.70    3.50
   3   7   0 1205.88   83.69
   3   7   0 1364.36   88.89
  -3  -7   1  104.19    9.70
   3  -7  -1  112.39   11.10
  -3  -7  -1  107.19   10.80
   3  -7   1  103.79   10.60
  -3   7   1  125.09    9.60
  -3  -7   2   30.30    4.60
   3  -7  -2   18.70    6.10
  -3  -7  -2   19.40    6.00
   3  -7   2   20.30    5.40
   3   7   3  910.81   59.49
   3  -7  -3  999.40   59.99
  -3   7  -3 1028.60   62.39
   3  -7  -3  913.51   60.29
  -3  -7   3  910.61   60.19
   3  -7  -3  987.70   62.39
   3   7  -3  862.91   61.29
   3  -7   3  933.41   62.19
  -3  -7  -3  957.20   65.29
  -3  -7  -3 1079.79   61.79
   3  -7   3  966.00   62.29
   3  -7  -4  354.86   25.70
  -3   7  -4  360.96   28.60
   3  -7  -4  334.47   27.60
   3  -7  -4  380.66   25.30
   3  -7  -4  412.96   25.10
   3  -7  -4  361.56   25.40
  -3  -7  -4  403.66   25.90
   3  -7   4  351.86   29.00
   3  -7   4  357.66   29.50
  -3   7   4  385.46   26.30
   3   7  -4  386.46   24.90
  -3   7   4  405.96   24.20
  -3  -7  -4  396.66   29.00
   3   7  -4  366.06   27.50
   3  -7  -5  742.53   43.70
   3  -7  -5  652.23   44.40
   3  -7  -5  627.84   43.40
  -3   7  -5  681.43   48.30
  -3  -7   5  671.53   47.40
  -3   7  -5  655.73   43.50
   3  -7  -5  716.73   43.20
  -3   7   5  736.03   42.70
  -3  -7  -5  688.73   47.90
   3  -7   5  672.03   51.09
  -3   7   5  678.13   45.00
   3   7  -5  667.03   46.70
   3   7  -5  646.24   43.20
  -3  -7  -5  693.93   44.40
   3  -7  -6  840.22   56.39
  -3   7  -6  956.60   55.99
   3   7   6  837.02   58.29
   3  -7  -6  949.31   56.39
  -3   7  -6  962.00   55.69
  -3   7  -6  878.51   61.59
   3  -7  -6  982.90   55.69
   3  -7  -6  916.21   57.89
   3  -7   6  928.31   75.09
  -3  -7  -6  848.52   59.39
   3  -7   6  793.92   58.09
  -3   7   6  920.21   58.29
   3   7  -6  878.51   56.39
   3   7  -6  879.71   59.99
  -3  -7  -6  941.81   57.59
   3  -7   6  785.72   59.29
  -3   7  -7  397.36   25.40
   3  -7  -7  427.86   28.00
  -3   7  -7  400.56   34.20
   3  -7  -7  440.06   29.70
   3   7   7  431.06   30.70
  -3  -7   7  413.26   29.00
   3  -7  -7  413.76   26.80
  -3  -7  -7  402.56   28.70
   3  -7   7  473.05   40.00
  -3  -7  -7  418.56   28.10
   3   7  -7  393.66   32.00
  -3   7   7  430.76   30.10
  -3  -7  -7  364.36   27.50
   3  -7  -8   66.29    9.60
   3  -7  -8   68.49   10.90
  -3   7  -8   72.29   13.10
   3  -7   8   45.40   10.50
  -3  -7  -8   58.99    8.00
  -3   7   8   73.19    7.60
   3  -7   8   53.39   10.60
  -3  -7  -8   73.69    9.80
   3   7  -8   48.10   10.30
   3  -7  -9  583.94   36.70
  -3   7  -9  578.24   39.90
  -3  -7  -9  577.84   36.80
   3   7  -9  522.65   39.70
   3  -7 -10   87.09    8.50
  -3   7 -10   78.59   10.40
   3   7 -10   74.99   10.80
   3  -7  10   62.69   10.20
  -3  -7 -10   95.79    8.70
  -3   8   0    1.90    2.80
   3  -8   0    3.20    4.80
  -3  -8   0    2.60    4.60
   3  -8   0    2.90    5.10
   3   8   0    1.90    3.30
   3  -8  -1    5.40    5.60
   3  -8  -1    9.50    3.50
   3  -8  -1    5.70    3.60
  -3  -8   1   14.90    4.70
   3  -8   1    5.30    5.00
   3   8  -1    4.30    2.70
   3   8  -1    4.00    3.50
  -3  -8  -1    1.00    5.10
  -3   8   1   -1.60    2.60
  -3   8  -2   30.50    4.80
  -3  -8   2   19.80    5.00
   3  -8  -2   21.10    4.30
   3   8   2   25.80    5.10
   3  -8  -2   32.30    5.50
   3  -8  -2   25.50    7.20
  -3  -8  -2   26.90    7.30
  -3  -8  -2   29.10    5.20
  -3   8   2   32.10    5.30
   3   8  -2   19.30    6.00
   3   8  -2   23.40    3.70
   3   8  -2   30.20    4.70
   3  -8   2   24.10    6.40
   3  -8   2   35.20    7.20
   3  -8  -3    2.30    6.10
  -3  -8   3   13.60    4.40
  -3   8  -3    8.80    4.00
   3  -8  -3    3.50    4.60
   3   8   3    8.70    3.20
   3  -8  -3    2.70    3.90
   3   8  -3    4.10    5.50
   3  -8   3   11.80    5.80
  -3  -8  -3    4.50    6.80
  -3   8   3    7.50    4.60
   3  -8   3   -1.00    3.70
   3   8  -3    3.90    3.90
  -3  -8  -3    7.40    4.80
   3  -8   3    4.20    5.90
   3   8   4  290.87   18.50
   3  -8  -4  260.07   22.80
   3  -8  -4  262.97   19.20
   3  -8  -4  292.57   20.00
   3   8   4  258.27   18.40
   3  -8  -4  311.57   19.70
  -3   8  -4  295.87   24.10
  -3  -8  -4  307.67   20.70
   3   8  -4  304.37   19.40
   3  -8   4  260.07   19.40
   3  -8   4  267.37   24.10
   3  -8   4  260.57   23.80
   3  -8   4  241.68   20.00
  -3  -8  -4  256.27   23.50
   3   8  -4  272.77   22.70
   3   8   5 1780.02  108.19
   3  -8  -5 1630.54  113.39
  -3   8  -5 1856.41  107.29
  -3  -8   5 1614.14  111.59
  -3  -8  -5 1810.62  112.79
   3  -8   5 1809.62  108.79
   3  -8   5 1697.93  109.29
  -3   8  -6  146.79    9.50
   3  -8  -6  151.28   12.50
   3  -8  -6  132.29   18.20
   3  -8  -6  148.79   12.70
  -3  -8   6  142.19   14.80
   3  -8  -6  130.89   10.90
   3   8   6  110.49   12.50
  -3   8  -6  123.99   19.40
  -3  -8  -6  145.39   14.30
  -3   8   6  141.39   13.80
   3  -8   6  108.79   19.30
   3   8  -6  133.29   17.80
  -3  -8  -6  152.98   12.20
   3  -8   6  112.69   14.40
   3  -8  -7   -4.80    4.10
  -3   8  -7  -15.90    9.60
   3  -8  -7   -0.50    4.80
  -3  -8   7    6.20    4.20
   3  -8  -7    3.50    9.80
  -3  -8  -7  -11.80    6.00
   3  -8   7   -6.50    5.70
  -3   8   7    0.90    3.10
   3  -8   7   -7.40    6.60
   3  -8   7    2.10    9.30
   3   8  -7   -2.50    8.00
  -3  -8  -7   -3.80    4.50
  -3   8   7    4.40    6.60
  -3  -8  -7    6.00    4.60
  -3   8  -8  196.48   20.90
   3  -8  -8  228.78   16.10
  -3  -8  -8  189.78   15.90
   3  -8   8  218.98   19.30
   3   8  -8  190.48   19.30
   3  -8   8  190.78   18.40
  -3  -8  -8  231.98   16.20
  -3   8  -9  152.08   20.10
   3  -8  -9  190.18   15.10
  -3  -8  -9  177.38   13.20
   3  -8   9  152.48   14.20
   3   8  -9  158.88   17.90
   3  -8   9  158.18   15.00
   3  -8 -10    5.10    3.10
  -3   8 -10    2.00    3.30
   3  -8  10    6.90    3.20
   3   8 -10    2.40    3.90
  -3  -8 -10    5.60    3.40
   3  -9   0   44.10    7.20
   3  -9   0   50.39    9.30
   3   9   0   50.09    7.20
  -3  -9   0   51.79    8.40
  -3   9   0   50.79    6.60
   3  -9   0   44.00    7.20
   3  -9  -1   49.90    8.00
   3  -9  -1   49.60    9.50
  -3   9  -1   54.29    7.60
   3  -9  -1   57.39    7.90
   3   9   1   65.29    7.00
  -3  -9   1   61.89    8.80
   3  -9   1   47.30    7.40
   3  -9   1   53.79    7.40
   3  -9   1   55.29    9.70
  -3  -9  -1   67.49    7.80
   3   9  -1   53.19    7.40
  -3   9   1   64.39    6.60
  -3  -9  -1   62.59    9.70
   3  -9  -2 1904.71  118.99
   3  -9   2 1753.62  115.69
   3  -9   2 1974.10  118.99
  -3  -9  -2 1892.01  118.89
   3  -9  -3   10.10    7.00
   3   9   3    9.30    3.60
  -3   9  -3    8.90    7.30
   3  -9  -3    9.70    5.20
  -3  -9   3   13.50    5.00
   3  -9  -3    6.40    7.00
   3   9  -3    9.50    5.10
   3  -9   3   14.00    7.20
  -3  -9  -3   13.90    6.60
  -3   9   3   15.70    4.90
   3  -9   3    7.40    4.60
  -3  -9  -3   10.90    7.90
   3  -9   3   20.00    7.20
   3  -9   3   11.20    4.00
  -3   9  -4   66.39   10.70
  -3  -9   4   41.20    8.10
   3   9   4   52.39    7.60
   3  -9  -4   51.69    8.70
   3  -9  -4   61.99    9.80
   3  -9  -4   42.80   10.00
   3  -9   4   56.79    7.90
   3   9  -4   59.19    8.00
   3  -9   4   52.19    8.00
  -3  -9  -4   61.79    8.30
   3  -9   4   53.69   10.80
  -3   9   4   64.29    9.10
   3   9  -4   38.50    9.40
   3  -9  -5   12.10    4.70
  -3  -9   5   11.20    7.00
   3  -9  -5    5.60    4.70
   3  -9  -5    7.60    5.90
  -3   9  -5    8.40    3.00
  -3   9  -5    3.20    9.00
  -3   9   5   13.20    5.60
  -3  -9  -5   11.50    9.20
   3   9  -5    3.00    7.60
   3  -9   5   25.30   10.30
   3  -9   5    9.20    4.80
   3   9  -5   14.00    4.30
  -3  -9  -5    9.20    6.60
   3  -9   5   11.50    5.60
   3  -9  -6 1286.97   77.99
  -3   9   6 1385.86   80.29
   3  -9   6 1263.27   80.49
   3   9  -6 1224.88   82.09
   3  -9   6 1178.58   79.89
   3  -9   6 1274.57   87.49
  -3   9  -7    8.80    8.50
   3  -9  -7   15.70    4.60
  -3  -9  -7   26.50    5.20
   3  -9   7   18.20    6.30
   3   9  -7   19.70    9.00
  -3  -9  -7   16.40    6.40
  -3  -9  -7   15.00    4.70
   3  -9   7   25.20    7.10
  -3   9  -8  307.57   24.60
   3  -9   8  330.67   23.20
  -3  -9  -8  349.77   21.90
   3  -9   8  323.57   23.00
  -3  -9  -8  304.57   21.20
   3   9  -8  288.27   24.30
   3  -9  -9   11.40    3.40
  -3   9  -9    8.90    4.30
  -3  -9  -9    7.90    3.40
   3  -9   9    7.60    5.90
   3  -9   9   14.30    3.80
   3   9  -9    5.50    4.90
  -3  10   0    1.00    3.60
   3  10   0    1.60    4.60
   3 -10   0    3.90    4.20
  -3 -10   0    8.30    4.30
   3 -10   0    1.50    7.40
   3 -10   0   -0.80    4.90
   3  10   1   91.39    9.20
   3 -10  -1   83.29   10.20
  -3  10  -1   92.99    9.00
  -3 -10   1   66.99   10.90
   3 -10  -1   84.19   16.10
   3 -10  -1   81.79    9.80
  -3 -10  -1   85.79   13.30
   3 -10   1   75.29    9.00
   3 -10   1   72.99    9.50
  -3 -10  -1   83.39   12.50
   3  10  -1   84.19    9.70
  -3  10   1   74.49    7.80
   3 -10  -2   39.60    6.40
  -3 -10   2   37.10    7.60
   3 -10  -2   29.40    9.40
   3 -10  -2   34.50    6.70
  -3  10  -2   52.79    8.40
   3  10   2   31.40    5.60
   3  10  -2   33.40    5.90
   3 -10   2   33.10   10.10
   3 -10   2   40.00    6.50
  -3 -10  -2   32.50    6.60
   3 -10   2   47.30    7.70
  -3 -10  -2   41.50    9.70
   3 -10   2   37.00    8.80
   3  10  -2   23.30    7.30
  -3  10  -3  311.97   22.60
  -3 -10   3  279.47   21.40
   3 -10  -3  233.18   23.30
   3 -10  -3  284.07   20.10
   3  10   3  265.57   18.70
   3 -10  -3  289.47   20.40
   3 -10   3  259.47   19.40
  -3 -10  -3  245.78   23.60
   3  10  -3  289.87   19.50
  -3 -10  -3  287.77   20.60
   3  10  -3  242.98   22.40
   3 -10   3  239.68   23.20
   3 -10   3  269.47   19.60
   3  10   4  319.07   22.70
  -3  10  -4  391.06   27.80
   3 -10  -4  386.76   24.70
  -3 -10   4  317.07   26.00
  -3  10  -4  356.76   22.50
  -3 -10  -4  293.87   27.90
   3  10  -4  324.17   27.20
   3 -10   4  328.57   28.60
  -3 -10  -4  385.96   25.10
   3 -10   4  343.47   24.30
   3 -10   4  331.47   24.00
   3  10  -4  372.66   23.80
  -3 -10   5   76.99   11.10
   3 -10  -5   64.79   10.20
  -3  10  -5   72.69   11.60
   3 -10  -5   61.49    8.70
   3 -10  -5   61.29    8.80
   3 -10   5   65.89    9.00
   3 -10   5   50.39   11.40
   3 -10   5   63.69    8.60
   3  10  -5   73.79    8.10
  -3 -10  -5   74.89    9.20
   3  10  -5   45.00    9.50
  -3  10  -6  118.59   14.50
   3 -10  -6  105.29   10.90
   3 -10  -6  123.29   11.10
   3  10  -6   89.29   14.40
  -3 -10  -6  103.19   11.00
   3 -10   6  104.09   11.70
   3 -10   6  124.99   12.00
  -3 -10  -6  104.19   12.10
  -3  10  -7    2.30    5.80
   3 -10  -7   10.00    4.50
   3  10  -7    2.40    6.70
  -3 -10  -7    1.70    4.80
   3 -10   7    9.50    4.90
  -3 -10  -7   12.50    4.30
   3 -10   7    8.60    4.60
  -3  10  -8  110.99   11.90
   3 -10  -8  124.79   10.00
   3  10  -8   95.69   11.90
  -3 -10  -8  122.79    9.80
   3 -10   8  127.29   10.20
   3 -10   8  123.19   10.60
   3  11   0  509.25   32.40
   3 -11   0  464.95   36.20
   3 -11   0  492.95   32.70
   3 -11   0  509.95   32.70
  -3 -11   0  471.15   32.50
  -3 -11   0  494.65   35.50
  -3 -11   1 1477.55   88.99
   3 -11  -1 1313.77   89.89
  -3 -11   1 1443.96   86.19
   3 -11   1 1438.86   90.09
  -3 -11  -1 1550.64   89.99
   3  11  -1 1210.28   87.29
   3 -11   1 1266.37   89.89
   3 -11  -2  245.38   18.70
  -3 -11   2  251.37   20.40
   3 -11  -2  230.78   22.50
   3  11   2  264.37   17.80
   3 -11  -2  262.47   19.10
   3 -11   2  255.77   18.30
  -3 -11  -2  238.98   22.00
   3  11  -2  215.88   20.30
  -3 -11  -2  254.87   18.80
   3  11  -2  244.68   18.00
   3 -11   2  239.88   18.30
   3 -11   2  249.78   22.30
  -3 -11   3  920.71   59.49
   3  11   3  912.41   56.29
   3 -11   3  944.21   57.09
   3 -11   3  895.31   61.29
   3 -11   3  893.41   57.19
  -3 -11  -3  871.41   60.99
   3  11  -3  872.91   59.19
   3  11   4   17.60    4.10
  -3  11  -4   17.80    8.00
   3 -11  -4   30.10    6.90
   3 -11  -4   20.70    5.30
  -3 -11  -4   25.00    6.90
   3  11  -4   28.80    5.40
   3 -11   4   35.40    5.90
   3  11  -4   19.60    7.80
   3 -11   4   30.90    5.30
   3 -11  -5  903.01   55.29
   3 -11  -5  862.11   51.69
   3 -11   5  825.72   52.69
   3 -11   5  789.32   52.29
   3  11  -5  757.62   54.19
   3 -11  -6  631.94   38.90
  -3  11  -6  643.44   40.90
   3 -11   6  625.44   39.20
   3 -11   6  600.14   39.10
  -3 -11  -6  609.84   38.50
   3  11  -6  529.25   40.40
   3 -11  -7  385.96   25.80
   3 -11   7  438.16   26.30
  -3 -11  -7  395.76   25.60
   3  11  -7  365.06   27.40
   3 -11   7  404.16   26.30
  -3  12   0    9.00    6.30
   3 -12   0    8.00    4.80
   3  12   0    0.80    4.40
  -3 -12   0    8.00    5.00
  -3 -12   0    0.80    3.80
   3 -12   0    6.30    5.30
   3  12   0    3.30    5.40
   3  12   1    3.80    4.40
  -3 -12   1    8.90    4.50
   3  12   1    0.30    4.70
  -3 -12   1    8.40    3.90
  -3  12  -1   13.70    6.50
   3 -12  -1    4.20    5.70
   3 -12  -1   11.60    5.00
   3  12  -1    6.90    4.60
   3  12  -1   -1.60    5.70
   3 -12   1    4.90    4.50
  -3 -12  -1    6.50    5.10
   3 -12   1    6.90    5.30
  -3  12  -2    6.50    6.60
   3 -12  -2    8.60    5.80
   3 -12  -2    4.20    4.60
   3  12   2    3.10    4.80
   3  12   2    0.70    3.70
  -3 -12   2    9.40    3.80
  -3 -12  -2    5.50    4.60
   3  12  -2    1.50    6.10
  -3 -12  -2    4.90    5.40
   3 -12   2   10.50    4.60
   3 -12   2    6.80    5.10
   3  12  -2    4.40    4.20
   3 -12  -3   14.80    4.80
   3  12   3   19.60    3.80
  -3 -12   3   15.70    4.20
   3 -12  -3   22.30    6.10
  -3  12  -3    8.10    6.60
  -3 -12  -3   11.40    4.60
   3  12  -3   16.70    4.40
  -3 -12  -3   13.60    5.70
   3  12  -3   19.10    6.80
   3 -12   3   21.80    4.80
   3 -12   3   14.90    4.80
  -3  12  -4   -6.10    5.50
   3 -12  -4    7.60    5.00
   3 -12  -4    0.00    4.00
   3 -12   4    4.90    6.00
  -3 -12  -4    1.70    5.00
   3  12  -4   -3.00    5.80
   3 -12   4    5.80    3.80
  -3 -12  -4    3.00    3.90
  -3  12  -5   20.40    5.90
   3 -12   5   27.20    4.50
   3  12  -5   19.30    6.20
  -3 -12  -5   26.10    5.30
   3 -12  -6   25.50    3.90
   3 -12  -6   16.60    4.30
  -3  12  -6   18.60    4.60
  -3 -12  -6   18.90    4.20
  -3 -12  -6   24.10    4.20
   3  12  -6   24.90    5.60
   3 -13   0   14.40    4.40
  -3  13   0   20.30    6.10
   3  13   0   15.60    3.80
  -3 -13   0   16.90    4.20
   3  13   0   14.00    5.30
   3 -13   0   19.60    5.20
  -3 -13   0   14.70    4.90
  -3 -13   1  630.84   40.40
   3  13   1  626.24   39.90
  -3 -13   1  674.93   40.50
   3 -13   1  668.13   40.70
   3  13  -1  581.74   41.40
   3 -13   1  627.14   40.70
  -3  13  -2  512.65   32.00
   3 -13  -2  458.85   30.40
  -3 -13   2  456.45   30.00
   3 -13  -2  474.85   30.20
  -3 -13   2  443.46   29.90
   3  13   2  439.26   29.40
   3 -13   2  493.45   30.60
   3  13  -2  426.36   29.70
   3 -13   2  454.25   30.50
  -3 -13  -2  511.95   33.40
  -3 -13  -2  448.96   30.10
   3 -13  -3  246.18   18.10
   3 -13  -3  221.98   19.20
  -3 -13   3  241.78   15.90
   3 -13   3  225.68   16.10
   3 -13   3  224.28   16.10
   3  13  -3  209.68   17.60
  -3 -13  -3  219.28   17.00
  -3  13  -4  204.18   15.30
   3 -13  -4  198.48   13.70
  -3 -13   4  171.88   13.20
   3 -13  -4  172.88   12.60
  -3 -13  -4  190.08   13.80
   3 -13   4  191.18   13.50
   3 -13   4  206.58   13.80
  -3 -13  -4  195.18   13.50
   3  13  -4  174.68   14.80
   3 -13  -5  468.85   30.20
  -3  13  -5  540.55   31.50
   3 -13   5  472.65   32.30
  -3 -13  -5  444.46   29.80
   3  13  -5  443.56   31.20
   3 -13   5  505.55   30.40
   3 -14   0    4.00    3.20
  -3  14   0    1.10    3.80
   3 -14   0    2.80    3.40
   3  14   0    1.70    3.20
  -3 -14   0    1.80    2.80
  -3 -14   0    1.90    2.90
   3 -14  -1  205.78   14.10
  -3 -14   1  187.48   13.70
  -3  14  -1  227.08   15.50
   3 -14  -1  192.28   13.70
   3  14   1  182.78   15.00
  -3 -14   1  195.18   13.70
   3 -14   1  209.08   14.10
  -3 -14  -1  190.18   13.80
  -3 -14  -1  193.98   13.80
   3 -14   1  197.58   14.00
  -3  14  -2    0.90    3.80
  -3 -14   2    1.30    2.40
   3  14   2    2.80    2.20
   3 -14  -2    0.10    2.60
   3 -14  -2    6.40    3.30
   3 -14   2    0.80    2.80
  -3  14   2    4.50    3.70
   3  14  -2    0.80    3.80
   3 -14   2    1.80    2.90
  -3 -14  -2    1.10    3.00
  -3 -14  -2    1.00    2.80
   3 -14  -3   36.40    5.00
  -3 -14   3   35.80    5.00
   3  14  -3   39.70    5.50
   3 -14   3   40.50    4.90
  -3  14   3   50.19    6.50
  -3 -14  -3   36.30    4.90
   3 -14   3   42.90    5.30
  -3 -14  -3   41.50    5.30
   4   0   0  201.08   13.10
   4   0  -1    1.70    0.50
   4   0   1    2.20    1.70
   4   0   1    0.30    1.20
  -4   0   1    3.20    0.90
   4   0   1    3.70    1.60
   4   0  -1    1.30    0.90
  -4   0   1    1.70    0.90
  -4   0  -1   -0.60    1.60
   4   0  -2 1285.37   78.49
   4   0   2 1292.47   79.09
  -4   0  -3   -0.50    2.40
  -4   0   3    1.70    1.30
  -4   0   3    2.20    1.40
   4   0   3   -3.00    2.40
   4   0   3    0.60    1.90
   4   0  -3   -0.50    1.10
   4   0   3    0.60    2.80
   4   0   4 4445.66  277.87
   4   0  -4 4666.83  277.17
   4   0  -5    2.60    2.10
   4   0  -5    1.40    2.00
   4   0   5    1.80    4.30
  -4   0   5    1.50    2.40
  -4   0  -5    3.60    3.40
   4   0   5   -2.80    4.00
  -4   0   5    5.10    2.70
   4   0  -6 3051.79  207.68
   4   0  -6 3754.92  207.58
   4   0   7   -1.20    7.10
  -4   0   7    1.90    4.20
  -4   0  -7    4.40    4.00
  -4   0  -7    8.20    4.80
   4   0   7   -7.20    4.60
   4   0   7   -6.10    6.50
   4   0  -7    2.30    2.40
   4   0  -7    5.60    4.00
   4   0   7    1.00    4.90
   4   0  -7   -3.10    3.10
  -4   0   7    0.20    4.00
   4   0  -8 2752.42  165.68
   4   0   8 2779.72  171.98
   4   0   8 2861.81  172.48
  -4   0   8 2468.05  168.58
   4   0   9   14.10    7.70
   4   0  -9   -1.00    4.50
   4   0   9  -10.50    7.80
  -4   0   9    2.40    3.90
  -4   0  -9    4.70    6.10
   4   0   9    0.20    7.80
  -4   0  -9   -2.40    7.70
  -4   0   9   -1.90    5.50
   4   0  -9   -0.70    2.80
   4   0  -9    4.30    3.50
  -4   0 -10   35.40    7.30
  -4   0  10   35.50    5.70
  -4   0 -10   34.20    9.50
  -4   0  11   -8.00    3.40
  -4   0 -11   -8.40    4.10
  -4   0  12   58.79    6.70
   4   0  12   49.10    8.20
  -4  -1   0    2.30    1.20
   4   1   0   -0.50    0.80
   4  -1   0    1.10    1.20
  -4   1   0    2.70    1.30
  -4   1   0    1.20    1.20
  -4  -1   0    1.90    1.10
   4  -1   0    0.90    1.20
   4  -1   0    0.30    1.40
   4   1  -1 3816.82  234.38
  -4   1  -2  238.88   17.90
   4  -1  -2  247.68   16.60
   4   1   2  254.67   16.90
   4  -1  -2  296.47   17.00
   4   1   2  297.27   17.90
   4  -1   2  240.58   18.00
   4  -1   2  300.47   18.80
  -4  -1  -2  262.67   17.90
   4   1  -2  256.87   16.30
  -4   1  -3    5.00    2.70
   4   1   3    6.90    2.90
   4  -1  -3    2.40    1.50
   4   1   3    1.10    1.90
  -4  -1   3    1.80    1.50
  -4  -1   3    5.00    1.20
   4  -1  -3    3.20    1.40
   4   1  -3    4.30    1.00
   4  -1   3    8.30    3.50
   4  -1   3    3.10    2.50
  -4  -1  -3    1.90    2.90
  -4   1   3    2.50    1.60
   4  -1   3   -0.70    2.90
  -4   1   3    3.90    1.90
   4   1   4  287.37   18.50
  -4  -1   4  216.88   16.60
  -4  -1   4  251.27   16.40
  -4  -1   4  277.17   16.30
   4   1   4  223.78   16.60
   4  -1  -4  240.58   15.90
  -4   1  -4  267.67   17.80
   4   1  -4  238.08   15.60
   4  -1   4  241.68   18.50
   4  -1   4  214.98   16.80
   4  -1   4  287.97   19.40
  -4   1   4  246.58   16.80
  -4  -1  -4  275.07   18.50
   4   1  -4  236.48   15.50
   4  -1  -5  161.38   11.50
   4   1   5  181.38   14.70
   4   1   5  202.18   15.30
  -4  -1   5  185.48   12.20
   4   1   5  156.08   13.00
  -4  -1   5  171.18   12.30
   4   1  -5  144.29   11.10
  -4   1   5  181.48   12.90
   4  -1   5  178.18   15.50
   4  -1   5  173.98   15.40
  -4  -1  -5  160.48   14.20
   4   1  -5  158.08   11.00
  -4   1   5  176.28   12.70
  -4  -1   6   51.99    6.50
  -4  -1   6   49.20    6.30
   4   1   6   60.89    9.60
   4   1   6   53.89    9.40
   4  -1  -6   51.89    5.60
  -4   1   6   48.10    6.70
   4  -1   6   43.10    9.40
   4   1  -6   45.40    4.60
  -4   1   6   46.10    6.90
   4  -1   6   57.49    9.90
   4   1  -6   48.60    5.00
  -4  -1   7  140.49   11.90
   4  -1  -7  139.89   10.50
   4   1   7  121.59   15.50
  -4  -1   7  119.39   11.60
   4   1   7  149.09   15.60
   4  -1  -7  128.59    9.80
   4   1   7  137.59   12.60
  -4   1  -7  134.69   11.90
   4   1  -7  125.39    9.00
   4   1  -7  129.09    9.20
   4  -1   7  106.29   12.90
   4  -1   7  138.79   16.30
  -4   1   7  135.79   12.40
  -4  -1  -7  122.79   11.30
   4   1  -7  125.99   11.80
   4  -1   7  127.79   13.00
   4   1  -7  118.79    9.70
   4  -1   7  129.79   16.60
  -4  -1   8   89.29   10.80
   4   1   8   85.69   14.00
   4   1   8   71.99   12.00
   4   1   8   69.39   14.30
   4  -1  -8   83.59    9.00
   4  -1  -8   85.19    8.30
  -4   1  -8  108.19   11.40
   4   1  -8   88.29    7.30
  -4  -1  -8   92.69   10.30
   4   1  -8   96.09   11.20
  -4  -1  -8   93.49   11.80
  -4   1   8  100.29   12.00
   4   1  -8   99.59    7.10
  -4   1   8  102.19   11.60
   4  -1   8   80.99   15.50
   4  -1   8   92.19   15.20
   4   1   9  457.55   37.80
   4   1   9  493.45   39.10
  -4   1  -9  534.65   34.30
   4  -1  -9  480.85   30.90
   4   1   9  453.25   33.70
  -4  -1   9  507.45   31.90
  -4   1  -9  496.35   32.90
  -4  -1   9  433.56   33.60
   4  -1  -9  503.65   31.30
  -4   1   9  481.05   31.80
  -4   1   9  452.45   34.60
   4  -1   9  502.05   40.70
  -4  -1  -9  504.95   34.70
  -4  -1  -9  463.15   33.00
   4  -1   9  500.75   40.00
  -4   1   9  488.65   34.30
   4  -1   9  453.85   34.90
  -4   1 -10  151.28   13.40
  -4   1 -10  138.59   14.30
  -4  -1  10  126.59   12.20
   4  -1 -10  148.29   10.10
  -4  -1 -10  125.69   15.90
  -4  -1 -10  114.99   13.90
  -4   1  10  140.19   12.20
  -4  -1  11  145.49   11.40
   4   1  11  116.39   14.10
   4  -1  11  124.19   16.70
  -4  -1 -11  147.09   12.70
  -4   1  11  155.88   14.90
  -4   2   0  289.47   17.10
   4   2   0  256.47   16.20
   4  -2   0  289.17   17.40
  -4  -2   0  242.68   16.50
   4  -2   0  268.37   17.10
   4  -2   0  245.08   16.70
  -4  -2   0  242.08   16.40
   4  -2  -1  411.86   24.50
   4  -2  -1  339.77   23.70
   4   2   1  374.46   23.70
   4  -2   1  389.96   24.70
   4  -2   1  386.16   24.90
   4   2  -1  390.86   23.30
   4  -2  -2  602.94   37.50
  -4   2  -2  654.73   39.00
   4  -2   2  563.04   39.10
   4   2   3 3297.57  184.48
   4  -2   3 2741.73  184.88
  -4  -2   4   24.30    2.90
  -4  -2   4   29.10    3.00
   4   2   4   22.60    5.10
   4  -2  -4   20.90    3.30
  -4  -2   4   24.70    2.70
   4   2   4   25.90    3.90
   4   2   4   21.10    4.70
   4  -2   4   14.00    5.30
  -4   2   4   23.40    3.90
  -4   2   4   17.60    3.60
  -4  -2  -4   18.30    5.20
   4  -2   4   15.50    4.80
   4  -2   4   20.80    5.90
   4  -2  -5 1890.01  118.69
  -4  -2   5 1925.21  119.09
   4   2   5 1974.20  119.29
   4  -2  -5 2069.79  118.59
   4   2  -5 1816.52  117.59
   4   2  -5 1932.91  117.59
   4   2   6  863.11   53.39
   4   2   6  949.60   56.29
   4  -2  -6  832.32   52.59
   4   2   6  930.81   53.59
   4   2   6  789.52   53.49
  -4   2  -6  878.01   53.49
   4  -2   6  754.72   56.99
   4  -2   6  835.72   58.09
   4   2  -6  770.32   53.49
   4   2  -6  784.82   51.29
  -4   2   6  876.21   54.29
   4  -2  -7 3073.09  183.88
   4  -2   7 2922.51  189.88
   4  -2  -8   73.79    8.90
   4   2   8   73.09   13.00
   4  -2  -8   77.19    8.00
  -4   2  -8   93.39   11.50
   4   2   8   50.59   12.00
  -4   2  -8   77.29    9.20
   4   2  -8   69.39   11.10
  -4   2   8   73.49    8.30
  -4   2   8   65.39   10.90
   4  -2   8   44.20   12.60
   4  -2   8   53.89   10.00
  -4  -2  -8   67.29   10.20
  -4  -2  -8   58.39    9.30
   4  -2   8   84.99   12.90
   4  -2   8   84.09   15.90
  -4   2   8   60.49    9.60
   4  -2  -9  226.98   17.00
   4   2   9  197.08   22.10
   4  -2  -9  208.18   16.20
   4   2   9  203.38   23.70
  -4   2  -9  239.78   18.10
  -4  -2   9  242.68   16.70
  -4  -2   9  205.58   18.30
  -4   2  -9  217.38   18.90
   4  -2   9  268.17   22.60
   4  -2   9  271.77   27.70
  -4  -2  -9  204.38   19.90
   4  -2   9  203.38   21.80
  -4  -2  -9  258.07   18.60
   4   2  -9  222.08   19.50
  -4   2   9  234.28   16.90
   4  -2   9  271.07   31.00
  -4   2   9  224.78   19.40
  -4  -2  10  147.29   12.70
  -4   2 -10  145.39   13.20
   4  -2 -10  161.28   11.40
   4  -2 -10  139.49   11.80
  -4   2 -10  155.78   12.80
  -4  -2 -10  113.99   14.30
  -4   2  10  149.59   12.40
   4  -2  10  118.09   18.40
  -4  -2  11   26.10    4.40
  -4  -2 -11    9.70    7.70
   4  -3   0    1.40    1.90
   4   3   0    4.60    1.10
   4  -3   0    2.60    1.60
  -4  -3   0    1.50    1.20
  -4   3   0    3.20    1.80
   4   3   1   94.19    6.10
   4  -3  -1   78.69    6.20
  -4   3  -1   77.19    7.20
   4  -3   1   78.49    7.20
  -4  -3  -1   94.59    7.00
  -4   3   1   84.29    6.60
  -4   3   1   84.19    6.70
   4  -3   1   98.49    7.30
  -4   3  -2  581.34   35.10
   4   3   2  500.75   34.20
   4   3   2  558.84   33.90
   4  -3  -2  512.25   33.70
   4  -3   2  557.34   35.10
   4  -3   2  546.95   35.50
   4  -3  -3  316.67   21.80
   4  -3  -3  388.56   22.90
   4   3   3  328.77   22.90
   4   3   3  364.66   22.20
  -4  -3  -3  359.36   23.80
  -4   3   3  305.47   22.30
   4  -3   3  333.97   24.30
  -4   3   3  347.17   22.60
  -4  -3   4   13.60    2.30
   4   3   4   10.40    3.10
   4  -3  -4   11.60    2.90
   4   3   4    6.90    4.40
   4  -3  -4   10.40    3.20
  -4  -3   4    8.60    1.60
  -4  -3  -4    5.90    4.60
   4  -3   4    2.70    4.70
   4  -3   4    1.60    5.10
  -4   3   4   21.00    4.30
  -4   3   4    8.40    3.20
   4   3   5  168.68   12.70
   4   3   5  186.18   15.40
   4  -3  -5  166.48   12.20
  -4  -3   5  190.88   12.30
   4   3   5  176.68   14.80
  -4   3   5  171.98   13.40
   4  -3   5  132.89   16.70
  -4   3   5  159.08   13.60
  -4  -3  -5  171.18   15.50
   4  -3  -6  234.98   17.00
   4  -3  -6  270.57   16.40
  -4  -3   6  250.47   18.60
   4  -3  -6  225.58   17.50
   4   3   6  279.17   21.20
   4   3   6  226.08   20.00
  -4  -3  -6  232.18   17.70
   4   3  -6  245.38   18.30
   4  -3   6  260.17   24.10
   4  -3   6  193.58   22.40
  -4   3   6  256.17   23.10
  -4   3   6  249.28   18.50
  -4   3   6  249.78   16.60
  -4   3  -7   10.60    5.70
  -4   3  -7   -1.60    4.80
   4   3   7    2.00    6.70
   4   3   7   -4.40    7.10
   4  -3  -7   -4.60    4.40
   4   3   7   -2.50    4.40
  -4  -3   7   -0.50    3.50
   4  -3  -7    1.00    3.60
   4  -3   7   -7.60    7.90
  -4   3   7    0.50    5.10
  -4  -3  -7   -1.00    4.50
  -4  -3  -7    8.20    4.20
   4   3  -7    7.10    5.30
  -4   3   7    5.30    3.30
  -4   3   7    4.70    5.30
   4  -3   7  -15.20    9.00
   4   3   8   87.89   14.10
  -4   3  -8   80.19   10.40
   4  -3  -8   68.99    8.60
   4  -3  -8   68.69    9.70
   4   3   8   81.69   13.40
  -4  -3   8   66.09    9.40
   4   3   8   70.79    9.10
   4  -3   8   53.69   10.80
  -4  -3  -8   78.49   10.40
   4  -3   8   61.79   21.90
  -4   3   8   69.29    8.70
   4   3  -8  102.09   12.70
  -4   3   8   91.79   12.10
  -4   3   8   96.59   11.60
   4  -3   8   82.79   12.80
  -4  -3  -8   89.79   11.60
   4  -3   8   73.39   16.60
  -4   3  -9   -5.60    4.80
  -4   3  -9   -3.10    5.90
  -4  -3   9    2.50    5.10
   4  -3  -9    3.50    5.70
   4  -3  -9    0.50    4.40
   4   3   9    0.00    9.10
  -4   3  -9   -0.90    7.10
  -4   3   9    2.20    6.50
  -4   3   9    6.10    6.10
  -4   3   9    0.20    4.20
   4  -3   9  -13.20   10.00
  -4  -3  -9   -9.80    5.60
  -4  -3  -9  -11.20    7.30
   4  -3   9    0.90    9.30
   4   3  -9    4.70    6.90
   4  -3   9  -14.80    8.50
   4  -3   9    2.00    8.80
   4   3  10   19.70    6.10
   4  -3 -10   29.90    4.90
   4  -3  10   50.99   11.80
  -4   3  10   25.00    4.90
  -4  -3 -10   15.60    6.70
   4  -3  10   51.29   11.10
   4  -3 -11  145.49   10.30
   4   3  11  174.68   11.90
  -4  -3  11  160.98   11.80
   4  -3  11  150.78   17.10
  -4  -3 -11  135.99   13.50
   4  -4   0  302.47   18.70
   4  -4   0  250.57   17.70
   4  -4  -1 1841.02  109.09
   4  -4   1 1718.93  110.29
   4  -4  -2  125.59   10.10
   4  -4  -2  117.49    8.90
  -4  -4  -2  127.79   10.40
   4  -4   2  130.69   10.40
  -4   4   2  125.39    9.60
   4  -4   2  144.19   10.70
  -4   4   2  121.59    9.40
   4   4   3 1419.96   93.99
   4  -4  -3 1612.84   93.39
   4   4   4 1286.97   77.69
   4  -4  -4 1353.06   76.29
   4  -4   4 1112.99   79.19
   4  -4   4 1146.99   79.69
   4  -4  -5 3470.75  205.38
  -4  -4  -5 3242.98  205.68
   4   4   6  375.86   26.70
   4   4   6  307.97   25.50
   4   4   6  308.87   22.70
   4  -4  -6  325.47   22.40
   4  -4  -6  366.36   23.30
  -4  -4   6  354.96   23.10
  -4   4  -6  361.26   24.00
   4  -4   6  323.87   31.30
  -4  -4  -6  340.07   23.60
  -4   4   6  348.07   24.80
   4   4  -6  341.67   24.60
  -4   4   6  321.37   24.10
  -4  -4  -6  312.97   22.70
  -4  -4  -6  358.16   24.10
  -4  -4   7 1239.98   79.89
   4  -4  -7 1251.57   79.69
   4   4   7 1247.88   82.99
   4   4   7 1165.08   82.69
   4  -4   7 1392.06   90.69
   4  -4   7 1189.08   82.29
  -4  -4  -7 1337.37   80.89
   4   4  -7 1284.37   81.29
  -4   4   7 1279.97   81.09
  -4   4   7 1374.46   81.69
  -4  -4   8  310.47   21.60
   4  -4  -8  277.47   20.50
   4  -4  -8  311.77   21.60
   4   4   8  251.37   25.60
  -4   4   8  299.07   23.70
  -4  -4  -8  276.37   21.20
   4   4  -8  298.07   23.60
  -4   4   8  294.47   22.80
   4  -4   8  314.67   26.50
   4  -4   8  285.17   32.50
   4  -4   8  321.37   33.60
  -4   4   8  293.17   20.30
  -4  -4  -8  278.77   22.70
  -4  -4  -8  295.57   20.40
  -4   4  -9  163.18   12.40
   4  -4  -9  135.79   13.80
  -4  -4   9  139.69   13.30
   4   4   9  131.09   13.30
   4  -4  -9  151.08   12.80
  -4   4  -9  152.58   17.30
  -4   4  -9  164.58   12.20
   4  -4   9  169.88   20.30
   4  -4   9  119.49   16.50
   4  -4   9  180.68   24.70
  -4  -4  -9  122.29   14.00
  -4   4   9  158.38   12.50
   4   4  -9  146.89   16.90
  -4  -4  -9  161.98   17.40
   4  -4 -10   19.10    4.80
   4   4  10   21.90    4.80
  -4   4 -10   22.80    8.00
  -4  -4 -10   10.60    6.00
   4  -4  10    4.80    9.10
  -4   4  10   22.60    4.50
   4  -4  10   38.00   10.50
   4  -4 -11  241.98   16.40
  -4  -4  11  254.57   17.00
  -4  -4 -11  240.28   18.30
  -4   4  11  281.27   16.90
   4  -4  11  228.38   21.10
  -4   5   0    2.70    2.80
  -4  -5   0    1.50    2.10
   4  -5   0    0.20    2.40
   4  -5   0    3.20    2.90
  -4   5   0    3.60    2.40
   4  -5  -1  267.67   19.10
  -4  -5   1  294.97   19.00
  -4  -5   1  285.97   19.00
   4  -5  -1  309.77   20.40
  -4   5   1  325.97   19.50
   4  -5   1  296.47   20.20
   4  -5   1  252.97   20.10
  -4   5   1  306.07   19.50
  -4  -5  -1  299.37   20.10
   4  -5  -2    1.90    2.50
   4  -5  -2    2.70    3.40
  -4  -5   2    5.70    1.30
  -4  -5   2    2.70    1.30
  -4  -5  -2    3.80    3.50
  -4   5   2    0.40    2.80
   4  -5   2   12.70    3.70
  -4   5   2    4.10    2.70
   4  -5  -3   31.10    4.80
  -4  -5   3   42.00    3.00
   4  -5  -3   42.90    6.20
  -4  -5   3   43.40    3.20
   4  -5   3   36.80    6.60
  -4  -5  -3   36.50    5.40
  -4   5   3   36.00    5.30
   4  -5   3   32.00    6.20
  -4   5   3   36.60    5.50
  -4  -5  -3   44.80    7.30
  -4  -5   4  846.92   55.59
   4  -5  -4  955.70   55.99
  -4  -5   4  901.91   54.79
   4   5   4  860.81   56.89
  -4  -5  -4  877.01   56.19
   4  -5   4  886.61   59.69
  -4   5   4  903.91   56.59
   4   5   5   -1.30    5.80
   4   5   5    8.50    2.50
   4  -5  -5    8.40    3.10
  -4   5  -5    8.70    6.00
   4  -5  -5    4.90    2.90
  -4  -5   5    7.00    4.10
   4  -5  -5    6.80    4.20
   4  -5   5   -5.60    6.60
   4  -5   5   -8.70    7.30
  -4  -5  -5   12.90    5.00
   4   5  -5   10.80    4.80
  -4   5   5    1.20    5.20
  -4  -5  -5    5.60    6.30
   4   5   6  175.28   18.20
   4  -5  -6  206.48   13.70
   4  -5  -6  206.68   19.00
   4  -5  -6  188.28   14.50
  -4   5  -6  211.38   15.90
  -4   5  -6  220.78   19.90
  -4  -5   6  205.78   14.90
  -4   5   6  176.98   13.90
   4  -5   6  139.89   22.80
  -4   5   6  198.78   17.10
   4   5  -6  210.18   17.70
  -4  -5  -6  171.08   19.10
  -4  -5  -6  198.78   16.90
  -4  -5  -6  179.58   15.80
  -4   5   6  203.68   16.20
  -4  -5  -6  199.38   14.70
   4  -5   6  158.28   23.50
  -4   5  -7   22.70    9.70
   4  -5  -7   12.50    4.90
   4   5   7   -1.90    7.90
   4  -5  -7   10.00    6.30
  -4   5  -7   16.60    5.40
  -4  -5   7   17.50    4.60
   4  -5  -7   14.90    6.30
  -4  -5  -7    6.80    6.30
  -4   5   7   21.60    8.00
  -4   5   7   13.20    4.20
   4  -5   7    4.50   11.90
   4  -5   7   10.40   14.80
  -4  -5  -7   14.80    8.00
   4   5  -7   15.80    7.20
  -4   5  -8   28.60   10.10
  -4   5  -8   32.20    5.60
   4  -5  -8   37.70    6.40
   4   5   8   14.40    9.30
  -4  -5   8   36.20    6.00
   4  -5  -8   15.50    7.00
   4   5  -8   34.40    9.30
   4  -5   8   16.20   11.20
  -4   5   8   32.90    8.50
  -4   5   8   22.70    5.10
   4  -5   8   27.20   15.30
  -4  -5  -8   25.20    6.10
  -4  -5  -8   19.40    6.10
  -4  -5  -8   42.50    9.40
   4  -5  -9   62.39    9.40
  -4   5  -9   60.09   11.80
   4  -5   9   78.79   14.00
  -4   5   9   66.99    8.50
   4   5  -9   65.29   10.70
  -4  -5  -9   81.79    9.40
  -4   5 -10   -8.80    5.90
   4  -5 -10    3.40    4.20
   4  -5  10   -1.30   10.00
  -4  -5 -10   -6.60    5.30
  -4   5  10   -3.90    3.30
   4   5 -10   -0.30    7.20
   4  -5 -11    0.60    2.70
  -4   5  11    5.20    2.50
   4  -5  11   -5.40    4.90
   4  -5  11   -0.40    5.50
  -4  -5 -11    5.70    4.30
   4  -6   0 2451.65  150.38
   4  -6  -1  816.02   55.19
   4  -6   1  890.81   55.29
  -4   6   1  888.41   54.79
  -4  -6   3  108.89    8.00
   4  -6  -3   98.39    9.00
   4  -6  -3  115.69   11.10
   4   6   3   85.89    8.90
  -4  -6   3  101.19    7.50
  -4  -6  -3  112.19   11.60
   4  -6   3  130.99   11.90
  -4   6   3  101.49    9.50
  -4   6   3  113.39    9.90
   4  -6   3  113.99   11.40
   4  -6  -4 2264.07  138.79
   4  -6  -4 2346.87  140.69
   4  -6   4 2150.38  142.19
   4  -6  -5   27.00    6.20
  -4   6  -5   52.49    7.40
   4  -6  -5   36.30    5.70
  -4   6  -5   33.20    9.40
   4   6   5   42.70    4.10
   4  -6  -5   37.80    6.00
   4  -6  -5   45.30    6.40
  -4   6   5   48.10    7.60
  -4   6   5   41.50    7.30
  -4  -6  -5   52.49    7.40
  -4  -6  -5   51.29   11.40
   4  -6   5   37.40   11.20
  -4   6   5   42.10    6.00
   4   6  -5   46.00    7.90
   4  -6  -6 3069.89  172.18
   4   6   6 2682.63  173.38
   4  -6   6 3120.99  183.18
  -4  -6  -6 2784.22  176.28
   4  -6   6 2584.34  172.58
   4  -6   6 2556.94  180.48
   4  -6   6 2635.84  173.68
  -4   6   6 2920.51  173.08
   4  -6  -7  248.28   18.00
   4  -6  -7  234.08   17.10
  -4  -6   7  221.38   16.90
  -4   6  -7  230.88   23.60
   4  -6  -7  224.28   18.10
   4   6   7  191.58   20.90
   4  -6   7  236.18   30.10
  -4  -6  -7  212.58   18.60
  -4   6   7  230.78   16.30
  -4  -6  -7  239.28   17.80
  -4   6   7  203.68   18.80
   4   6  -7  238.58   20.80
  -4   6   7  225.08   19.60
   4   6   8  614.94   41.80
  -4  -6   8  519.25   39.50
  -4   6  -8  594.04   42.80
   4  -6  -8  569.54   38.90
  -4   6  -8  620.64   36.60
   4  -6  -8  569.74   37.90
  -4  -6  -8  527.55   38.20
  -4  -6  -8  630.44   38.70
  -4   6   8  626.74   40.40
   4   6  -8  602.24   41.50
   4  -6   8  540.55   42.50
   4  -6  -9  158.38   13.50
  -4   6  -9  163.18   18.50
   4   6  -9  160.08   17.50
  -4  -6  -9  182.18   14.60
   4  -6   9  145.09   18.70
   4  -6  10  541.55   38.20
   4  -6  10  564.44   39.10
   4   6 -10  594.64   42.40
  -4  -7   0    4.10    3.80
   4  -7   0    2.80    4.30
   4  -7  -1 1040.90   64.59
   4  -7   1 1023.50   64.49
  -4  -7  -1  955.00   64.09
   4   7   2  289.97   20.00
  -4  -7   2  296.97   20.40
   4  -7  -2  287.27   22.10
  -4   7  -2  299.37   20.00
   4  -7  -2  312.27   20.50
   4  -7  -2  320.67   20.10
  -4  -7  -2  284.17   22.30
   4   7  -2  301.27   19.90
   4  -7   2  282.67   21.90
   4  -7  -3   56.69    7.80
   4  -7  -3   68.69    9.80
  -4  -7   3   65.59    8.60
  -4   7   3   73.79    8.50
  -4  -7  -3   68.09   10.00
  -4  -7  -3   69.99    7.90
   4   7  -3   67.09    8.80
   4  -7   3   81.09   10.40
   4   7  -3   67.69    7.30
   4  -7   3   85.99   10.70
  -4   7   3   72.79    6.10
   4  -7  -4   77.59   11.60
   4  -7  -4   94.09    8.60
   4   7   4  100.39    7.80
  -4   7  -4   99.39   13.60
   4  -7  -4   89.89    9.80
   4  -7  -4   93.59    9.40
  -4   7   4  106.09    8.00
   4   7  -4   96.99   11.80
   4  -7   4  109.99   14.10
   4  -7   4   98.19    8.80
   4  -7   4   95.79   13.60
  -4  -7  -4   92.59   10.10
   4  -7   4   79.79    9.60
   4   7  -4   94.29    8.60
  -4  -7  -4   95.69   13.10
  -4   7   4  106.09   10.70
   4  -7  -5  221.48   16.90
   4  -7  -5  253.37   16.40
  -4   7  -5  227.28   17.80
   4  -7  -5  253.97   17.00
  -4   7  -5  235.38   22.60
   4   7   5  194.08   17.90
  -4  -7   5  243.18   19.70
  -4   7   5  246.08   18.70
   4  -7   5  204.38   17.50
  -4  -7  -5  210.98   21.50
  -4   7   5  256.17   15.90
   4  -7   5  212.38   18.70
   4   7  -5  225.98   19.70
  -4  -7  -5  242.28   18.40
   4  -7   5  273.57   25.60
   4   7  -5  223.68   16.40
   4  -7   5  200.28   23.50
  -4   7  -6   38.70   10.90
   4  -7  -6   40.80    8.30
   4  -7  -6   33.40    5.80
   4  -7  -6   41.30    6.50
  -4   7  -6   37.20    6.10
  -4   7   6   40.70    8.10
   4  -7   6   29.70    9.40
   4   7  -6   31.10    8.80
  -4  -7  -6   29.20   10.30
   4   7  -6   41.10    5.70
  -4   7   6   43.20    6.80
  -4  -7  -6   42.30    8.20
   4  -7   6   29.80   13.10
   4  -7  -7    6.40    5.00
  -4   7  -7    8.00    3.00
   4   7   7    5.30    6.90
  -4   7  -7    1.90    3.30
   4  -7  -7   -4.30    5.80
   4  -7  -7   -1.10    6.70
  -4  -7   7    7.20    3.40
   4   7  -7    0.80    7.20
  -4  -7  -7    1.40    4.70
  -4   7   7    3.00    3.80
  -4  -7  -7   -6.80    6.40
   4  -7   7   -1.00    6.70
  -4   7   7    4.90    6.30
   4  -7   7   -3.60   10.50
   4  -7   7   -7.10    7.70
  -4   7  -8  120.29   17.40
   4  -7  -8  130.59   12.20
   4   7  -8  120.39   15.40
   4  -7   8  106.09   16.40
   4  -7   8  108.39   16.20
  -4  -7  -8  106.89   12.60
  -4  -7  -8  152.58   12.70
  -4   7  -9  118.69   14.50
   4  -7  -9  109.39   10.70
   4  -7   9   96.59   14.80
   4   7  -9  111.49   14.50
   4  -7   9   95.49   13.70
  -4  -7  -9  132.39   11.30
  -4   7 -10   31.60    5.50
   4  -7 -10   32.80    4.60
   4  -7  10   41.90    8.40
   4   7 -10   33.10    6.00
  -4  -7 -10   36.70    4.90
   4  -7  10   37.90    6.30
   4  -8   0 1394.26   82.19
   4  -8   0 1259.37   79.49
   4  -8   0 1208.48   79.39
   4  -8  -1  996.70   64.29
   4  -8  -1 1052.09   65.69
   4  -8   1  974.20   62.99
  -4  -8  -1  993.50   65.19
  -4   8   1 1035.10   62.49
   4  -8   1 1012.90   63.09
   4  -8  -2  820.82   49.30
   4  -8  -2  789.32   52.09
   4  -8  -2  743.83   49.30
  -4  -8   2  760.22   49.99
   4   8   2  837.72   49.10
   4   8  -2  768.02   49.30
   4  -8   2  745.03   55.49
   4   8  -2  798.02   49.20
   4  -8   2  867.81   52.39
  -4  -8  -2  706.03   49.50
  -4  -8  -2  807.42   52.09
   4  -8   2  735.83   49.10
   4   8   3   54.39    6.30
  -4   8  -3   76.09   11.50
   4  -8  -3   62.89    8.40
  -4  -8   3   56.89    7.30
   4  -8  -3   55.19    7.70
   4  -8  -3   48.10    9.10
   4   8  -3   46.90    7.10
   4  -8   3   58.69    9.70
   4  -8   3   54.69    7.40
   4  -8   3   51.39    7.00
   4   8  -3   61.59    6.20
   4  -8   3   53.89    9.60
   4   8  -3   54.59    8.50
  -4  -8  -3   46.10    9.50
  -4  -8  -3   56.59    8.30
   4  -8  -4  352.96   28.80
   4  -8  -4  366.56   25.60
   4   8   4  408.86   24.90
   4  -8  -4  379.36   25.70
   4  -8  -4  421.76   25.60
   4  -8  -4  319.37   30.80
   4  -8   4  348.77   30.00
   4  -8   4  447.06   31.60
  -4  -8  -4  377.96   29.90
   4   8  -4  348.87   28.00
   4   8  -4  386.86   25.50
   4  -8   4  348.67   25.60
  -4  -8  -4  426.66   26.70
   4  -8   4  373.96   26.20
   4  -8  -5  758.12   51.09
  -4   8  -5  769.82   49.50
   4  -8  -5  809.52   49.60
  -4   8  -5  835.72   53.89
   4  -8  -5  851.21   49.20
   4  -8  -5  834.42   49.70
  -4   8   5  792.42   50.59
  -4  -8  -5  660.33   53.49
   4   8  -5  749.33   49.20
   4   8  -5  728.93   52.19
   4  -8   5  758.52   50.29
  -4  -8  -5  825.32   50.59
   4  -8   5  777.42   56.99
   4  -8   5  702.53   55.89
  -4   8  -6   76.39    7.90
  -4  -8   6   79.49    8.90
   4  -8  -6   72.89    9.40
   4  -8  -6   72.59    9.30
  -4   8  -6   53.99   12.20
   4  -8  -6   77.59   11.20
   4   8  -6   59.09   10.60
  -4  -8  -6   82.69   10.20
   4  -8   6   58.99   10.00
   4  -8   6   77.29   16.10
   4   8  -6   59.29    7.90
  -4   8   6   84.09    7.60
  -4   8   6   73.49   10.60
   4  -8   6   73.09   10.70
  -4   8  -7  449.36   33.60
   4  -8  -7  436.96   29.10
   4   8  -7  410.06   32.20
  -4  -8  -7  393.06   28.80
   4  -8   7  421.16   30.90
  -4  -8  -7  451.45   29.10
   4  -8   7  470.65   38.70
  -4  -8  -7  419.56   29.70
   4  -8   7  448.36   31.30
   4  -8  -8  219.18   16.80
  -4   8  -8  227.58   20.60
   4  -8   8  245.18   19.40
  -4  -8  -8  239.18   16.80
   4   8  -8  199.38   19.70
  -4  -8  -8  201.78   17.00
   4  -8   8  227.98   19.80
  -4   8  -9  158.38   14.80
   4  -8  -9  173.58   12.80
  -4  -8  -9  174.28   12.80
   4  -8   9  155.88   14.40
   4   8  -9  143.09   14.90
   4  -8   9  159.98   14.10
   4  -8 -10  156.88   11.50
  -4  -8 -10  164.88   11.60
  -4  -9   0    6.10    5.40
   4   9   0    1.50    4.10
   4  -9   0   -0.50    6.40
   4  -9   0    5.80    3.90
   4  -9   0    3.60    4.30
   4  -9  -1   22.50    4.90
  -4  -9   1   23.40    6.20
   4  -9  -1   16.30    5.20
   4  -9  -1   20.00    7.80
   4   9   1   22.90    4.60
   4  -9   1   19.30    4.80
   4  -9   1   17.00    4.30
   4   9  -1   11.80    5.30
   4  -9   1   32.00    8.20
  -4  -9  -1   24.00    4.90
  -4  -9  -1   15.60    7.10
   4   9  -1   19.90    4.80
   4  -9   1   14.50    6.40
  -4   9  -2   33.70    6.90
   4   9   2   37.30    5.30
   4  -9  -2   34.80    8.60
  -4  -9   2   23.40    5.90
   4  -9  -2   22.20    5.00
   4  -9  -2   29.90    6.00
   4  -9   2   32.50    5.60
   4   9  -2   28.10    5.30
  -4  -9  -2   21.00    8.10
   4   9  -2   20.30    6.10
   4  -9   2   29.20    7.90
  -4  -9  -2   28.20    5.80
   4  -9   2   30.20    8.20
   4  -9   2   35.30    5.20
   4   9   3   17.30    4.40
   4  -9  -3   26.70    6.10
   4  -9  -3   10.30    7.60
  -4  -9   3   22.20    5.40
  -4   9  -3   25.70    7.70
   4  -9  -3   21.80    5.20
   4  -9   3   25.00    8.20
   4  -9   3   17.60    7.70
  -4  -9  -3   24.90   10.00
  -4   9   3   17.80    5.40
   4   9  -3   21.60    7.20
   4  -9   3   19.70    4.80
   4   9  -3   19.90    5.10
  -4  -9  -3   12.90    7.50
   4  -9   3   24.20    5.60
  -4   9  -4  361.96   26.70
   4  -9  -4  318.97   23.30
   4  -9  -4  351.46   24.00
   4   9   4  320.87   22.40
   4  -9  -4  359.36   23.60
  -4  -9  -4  316.87   27.60
   4  -9   4  326.47   23.50
  -4  -9  -4  357.56   24.60
  -4   9   4  381.76   24.30
   4   9  -4  304.27   25.90
   4  -9   4  323.37   23.90
   4  -9   4  362.76   28.80
   4   9  -4  355.86   23.30
   4  -9   4  315.37   29.00
   4  -9  -5   13.40    6.00
   4  -9  -5   13.70    4.90
  -4  -9   5   13.10    5.50
  -4   9  -5   10.40    8.70
  -4   9  -5   10.20    4.10
   4  -9  -5    8.20    4.60
   4  -9   5   17.50    5.20
  -4  -9  -5    6.20    7.80
  -4  -9  -5    5.50    6.40
   4  -9   5   17.00    9.00
   4   9  -5   11.50    7.60
   4  -9   5   13.10    6.10
   4   9  -5    8.60    4.20
  -4   9   5   10.00    5.40
   4  -9  -6  342.27   22.50
  -4   9  -6  338.27   27.00
   4  -9  -6  316.67   22.50
   4   9  -6  297.37   26.00
   4  -9   6  318.97   24.00
  -4  -9  -6  325.37   23.60
   4  -9   6  312.77   23.30
   4  -9   6  315.77   29.60
   4  -9  -7  119.79   11.30
  -4   9  -7   89.29   15.30
   4   9  -7   91.39   14.60
   4  -9   7  131.99   13.00
  -4  -9  -7  101.09   10.60
  -4  -9  -7  126.99   11.60
   4  -9   7  116.59   12.50
  -4  -9  -7   98.29   12.20
  -4   9  -8   35.50    7.50
   4  -9  -8   53.99    8.40
   4   9  -8   36.80    7.80
   4  -9   8   49.10    7.40
   4  -9   8   36.80    6.40
  -4  -9  -8   41.10    5.80
  -4  -9  -8   51.39    7.30
  -4   9  -9  151.68   12.60
   4  -9  -9  159.88   11.80
   4   9  -9  136.89   13.00
   4  -9   9  172.38   12.70
  -4  -9  -9  171.68   11.70
   4  -9   9  163.88   12.30
   4  10   0   42.00    6.60
  -4 -10   0   29.40    8.30
   4 -10   0   43.70    6.40
   4 -10   0   52.79   15.20
   4 -10   0   37.90    6.50
   4 -10  -1  456.05   31.50
   4 -10  -1  482.25   37.10
  -4 -10   1  476.75   33.50
   4 -10  -1  442.16   31.30
   4  10   1  484.85   31.00
   4 -10   1  455.15   34.50
  -4 -10  -1  469.25   31.40
  -4 -10  -1  466.85   34.30
   4  10  -1  484.65   31.20
   4 -10   1  495.55   31.50
   4 -10   1  474.25   31.20
   4  10   2   57.69    7.70
   4 -10  -2   35.50    9.80
   4 -10  -2   39.30    6.70
  -4 -10   2   58.39    8.60
   4 -10  -2   59.99    9.50
  -4  10  -2   76.39   11.60
   4 -10   2   60.09    8.40
   4 -10   2   48.40    9.90
  -4 -10  -2   54.09   10.40
   4  10  -2   59.69    7.50
   4  10  -2   37.20    7.80
  -4 -10  -2   59.29    9.20
   4 -10   2   39.10    9.60
   4 -10   2   55.39    8.30
  -4  10  -3  818.92   49.40
  -4 -10   3  713.53   48.50
   4  10   3  736.43   46.50
   4 -10  -3  681.53   50.99
   4 -10   3  710.73   47.10
   4 -10   3  754.52   51.59
   4 -10   3  665.53   50.99
   4  10  -3  811.32   47.00
  -4 -10  -3  729.13   47.50
   4  10  -3  679.73   49.00
  -4 -10  -3  704.53   50.69
   4 -10   3  783.42   47.20
  -4  10  -4   43.40    9.30
  -4  10  -4   42.10    5.60
   4 -10  -4   40.00    6.30
   4 -10  -4   41.60    6.40
  -4 -10   4   35.10    7.30
   4 -10  -4   50.89    7.70
   4  10   4   44.60    6.20
  -4 -10  -4   29.90    9.50
  -4 -10  -4   51.39    8.30
   4 -10   4   31.60    9.70
   4 -10   4   56.19    8.40
   4 -10   4   42.30    7.00
   4  10  -4   25.30    8.00
   4  10  -4   49.10    6.30
   4 -10  -5  628.54   37.80
   4 -10  -5  628.64   38.50
   4 -10  -5  587.14   38.30
   4  10  -5  520.85   40.60
   4  10  -5  577.04   37.80
  -4 -10  -5  604.74   39.10
   4 -10   5  586.24   38.70
   4 -10   5  593.14   44.80
   4 -10   5  586.04   39.00
   4 -10  -6   54.39    8.40
  -4  10  -6   50.79    9.70
   4 -10  -6   57.39    8.30
  -4 -10  -6   61.39    8.10
   4 -10   6   68.49    9.40
   4 -10   6   63.99    9.50
  -4 -10  -6   43.10    6.60
   4  10  -6   56.19    9.60
   4 -10  -7  445.86   27.70
  -4  10  -7  418.86   29.60
  -4 -10  -7  397.96   27.70
   4  10  -7  360.16   29.40
   4 -10   7  440.26   28.30
  -4 -10  -7  415.66   26.70
   4 -10   7  440.56   28.40
   4 -10  -8   25.60    4.30
  -4  10  -8   21.10    5.30
   4 -10   8   25.60    4.50
   4  10  -8   16.40    4.80
   4 -10   8   25.10    4.50
  -4 -10  -8   23.60    3.80
   4 -11   0    8.20    5.10
   4 -11   0   -3.90    6.60
  -4 -11   0    6.20    4.50
   4 -11   0    6.20    5.80
  -4 -11   0    3.30    6.70
   4  11   0    5.10    5.00
   4  11   0   -0.80    4.90
   4 -11   0   -9.00    8.30
   4 -11  -1  147.39   13.40
   4  11   1  139.09   12.00
  -4 -11   1  133.29   14.90
   4 -11  -1  146.09   13.20
  -4  11  -1  155.98   14.70
   4 -11  -1  114.89   16.30
   4 -11  -1  153.58   21.80
   4 -11   1  116.69   16.10
  -4 -11  -1  145.19   12.80
   4 -11   1  138.49   12.70
   4  11  -1  130.39   12.40
  -4 -11  -1  127.49   15.60
   4 -11   1  142.59   12.60
   4 -11  -2   39.50    7.30
   4 -11  -2   37.50    6.40
   4  11   2   30.80    5.70
  -4 -11   2   45.50   12.00
  -4  11  -2   42.70    8.00
   4 -11  -2   21.70   12.40
   4 -11   2   26.40   11.20
   4 -11   2   39.20    6.70
   4 -11   2   33.10    6.00
   4 -11   2   15.90    7.90
   4  11  -2   21.80    6.80
  -4 -11  -2   35.20    6.70
   4  11  -2   33.50    6.10
  -4 -11  -2   24.90   12.20
  -4  11  -3  104.59   13.80
   4 -11  -3  112.79   12.00
  -4 -11   3   88.89   11.60
   4 -11  -3  116.19   11.20
   4  11   3   97.49    9.10
   4  11  -3  101.49   10.20
  -4 -11  -3   68.09   12.20
   4 -11   3   95.19   10.50
  -4 -11  -3   98.39   11.50
   4  11  -3   78.99   13.10
   4 -11   3   95.39   10.60
   4 -11   3   97.19   14.40
   4  11   4   -0.90    3.00
  -4  11  -4   -4.80    7.10
   4 -11  -4    0.10    4.60
   4 -11  -4    1.90    5.70
   4 -11   4    5.90    4.70
   4 -11   4    5.10    4.30
  -4 -11  -4   -1.40    5.50
   4  11  -4    6.50    4.40
   4  11  -4   -3.50    5.70
  -4  11  -5   20.90    7.40
   4 -11  -5   17.80    3.90
   4 -11  -5   25.40    5.90
   4 -11  -5   18.20    5.50
   4  11  -5   17.10    7.10
   4 -11   5   28.70    5.20
  -4 -11  -5   29.30    6.40
  -4 -11  -5   20.20    5.00
   4 -11   5   22.40    5.30
  -4  11  -6   -0.50    5.30
   4 -11  -6    1.70    4.10
   4 -11  -6   -3.30    3.50
   4 -11   6    2.40    4.10
  -4 -11  -6   -2.60    3.90
   4  11  -6   -2.40    6.40
   4 -11   6    5.40    3.80
  -4 -11  -6    0.00    4.70
   4 -11  -7  230.38   15.90
  -4  11  -7  243.38   17.30
   4 -11   7  240.18   16.30
   4 -11   7  229.98   16.20
   4  11  -7  201.48   17.10
  -4 -11  -7  233.38   15.80
   4 -12   0  128.29   12.10
  -4 -12   0  116.19   11.40
   4  12   0  120.89   11.30
   4 -12   0  112.99   12.30
  -4  12   0  146.69   13.80
   4  12   1    2.30    4.40
  -4  12  -1   10.20    6.30
   4 -12  -1   11.40    5.90
  -4 -12   1   10.10    4.10
   4  12   1    0.70    4.10
  -4 -12   1   13.20    4.60
   4 -12  -1   10.50    4.90
   4  12  -1   21.60    4.90
   4  12  -1    5.80    5.40
   4 -12   1    8.90    5.30
   4 -12   1   10.60    5.00
  -4 -12  -1   11.20    5.30
   4  12  -2 1202.48   76.29
   4  12   3  164.48   12.40
  -4  12  -3  173.38   15.90
   4 -12  -3  185.48   14.50
   4 -12  -3  185.18   13.80
   4  12  -3  135.99   15.10
   4  12  -3  173.98   13.20
   4 -12   3  175.58   13.70
   4 -12   3  155.98   13.70
  -4 -12  -3  164.48   14.20
   4 -12  -4  457.85   29.30
   4 -12  -4  429.96   28.60
  -4  12  -4  479.35   31.00
  -4 -12  -4  440.86   29.50
  -4 -12  -4  433.66   29.20
   4 -12   4  436.86   29.30
   4 -12  -5    9.30    4.00
   4 -12  -5   10.90    3.90
   4 -12   5   18.70    4.20
   4  12  -5    5.90    4.70
  -4 -12  -5   12.20    5.50
   4 -12   5   19.10    4.00
   4 -12  -6  649.83   38.60
   4 -12   6  608.74   38.50
   4 -12   6  666.83   38.80
   4  12  -6  552.94   39.30
  -4 -12  -6  578.54   38.70
   4  13   0    0.90    3.90
   4  13   0    0.20    3.30
   4 -13   0    4.60    4.80
   4 -13   0    1.80    4.20
  -4  13   0    1.80    5.00
  -4 -13   0    1.00    4.50
  -4 -13   0    2.80    3.80
   4 -13  -1  252.07   18.10
   4 -13  -1  247.18   17.60
  -4 -13   1  247.28   17.30
   4  13   1  258.57   17.10
  -4  13  -1  271.17   19.40
  -4 -13   1  233.08   17.30
  -4 -13  -1  237.48   17.70
   4 -13   1  249.48   17.90
   4 -13   1  258.87   17.80
   4  13  -1  219.88   17.00
  -4  13   1  277.37   18.70
  -4 -13  -1  234.18   17.60
   4 -13  -2  115.29   10.40
  -4  13  -2  125.29   12.40
   4 -13  -2  124.99   11.00
   4  13   2  113.09    9.10
  -4 -13   2  113.79    9.70
   4 -13   2  128.29   10.80
  -4 -13  -2  109.79   10.60
   4  13  -2  114.79    9.80
  -4 -13  -2  109.99   10.60
   4 -13   2  127.79   13.20
  -4  13  -3   98.59   11.40
   4  13   3   72.49    8.50
   4 -13  -3   88.39    9.40
   4 -13  -3   93.59    8.10
  -4 -13   3   80.29    7.80
   4 -13   3   99.79    9.00
  -4 -13  -3   96.79    9.00
   4  13  -3   71.49    9.20
   4 -13   3  105.69    8.70
  -4 -13  -3   87.69    8.50
   4 -13  -4  141.29   10.90
  -4  13  -4  158.38   12.80
   4 -13   4  149.99   10.90
  -4 -13  -4  132.09   11.30
  -4 -13  -4  130.49   10.70
   4 -13   4  151.78   11.10
  -4  13  -5   -0.80    2.90
   4 -13  -5   -1.10    2.00
   4 -13   5    1.90    3.20
  -4 -13  -5   -0.30    2.80
   4 -13   5    1.10    2.40
   4  13  -5   -0.30    2.80
  -4 -13  -5    1.00    2.40
   4 -14   0  121.99    9.30
  -4  14   0  125.29   10.70
  -4 -14   0  119.39    9.00
  -4 -14   0  106.59    9.40
   4  14   0   97.29    8.50
   4 -14   0  118.19    9.50
   4  14   1  146.69   12.30
  -4 -14   1  172.68   12.10
  -4  14  -1  197.18   13.80
   4 -14  -1  167.68   12.20
   4 -14  -1  166.98   12.50
  -4  14   1  182.68   13.30
   4 -14   1  180.08   12.50
  -4 -14  -1  169.98   12.30
  -4 -14  -1  162.38   12.20
   4 -14   1  185.08   12.50
   4 -14  -2    6.40    3.20
   4 -14  -2    8.30    2.50
  -4  14  -2    8.50    4.10
  -4 -14   2    6.10    2.20
   4  14  -2    8.50    2.60
  -4 -14  -2   11.00    3.20
  -4  14   2   13.00    3.80
  -4 -14  -2    9.40    2.90
   4 -14   2    8.50    3.20
   4 -14   2    9.00    3.00
  -5   0   0   -0.80    1.40
   5   0   0   -1.30    1.20
   5   0   0    0.30    1.20
  -5   0   0   -2.10    1.20
   5   0   1    0.30    1.90
  -5   0   1    0.80    0.90
  -5   0  -1   -1.00    1.90
   5   0  -1    1.70    1.20
   5   0   1    1.10    1.90
  -5   0   1    1.80    1.00
   5   0  -2  930.11   53.89
   5   0   2  830.42   54.59
  -5   0   3    3.20    1.60
  -5   0  -3    0.20    3.00
   5   0   3    5.20    2.30
   5   0  -3    0.80    1.40
   5   0   3    0.90    3.10
   5   0  -3    3.50    1.30
   5   0   3   -2.80    2.90
  -5   0   3    1.20    1.50
  -5   0   4   42.80    4.70
  -5   0  -4   54.89    7.20
   5   0  -4   34.40    3.80
   5   0   4   41.80    5.20
   5   0  -4   41.00    3.70
   5   0   4   56.29    7.80
   5   0   4   37.00    6.40
   5   0   5    2.30    4.00
   5   0   5   -5.70    4.40
   5   0  -5    3.90    2.30
  -5   0   5    0.10    2.50
   5   0   5   -6.20    4.40
  -5   0   5    4.90    2.70
   5   0  -5   -0.10    1.90
   5   0  -6   50.49    5.80
   5   0   6   48.90    9.90
   5   0  -6   48.60    6.70
  -5   0   6   52.79    7.00
   5   0   6   64.39   10.60
   5   0  -6   54.79    5.20
   5   0   7   -2.90    5.20
  -5   0  -7   -0.10    3.50
   5   0  -7   -3.50    3.20
  -5   0   7    2.30    4.10
   5   0  -7    0.00    2.20
   5   0  -7    0.20    3.00
   5   0  -7    4.50    4.10
  -5   0   7   -2.60    4.00
   5   0   7   -6.40    6.90
  -5   0  -7   -2.30    4.10
   5   0   7   -9.10    6.90
   5   0   7   -7.40    4.90
   5   0  -8   91.19    7.30
   5   0   8   80.09   14.50
  -5   0  -8   95.99   11.50
   5   0   8   82.49   10.60
  -5   0   8  115.39   15.90
   5   0   8   92.69   12.90
   5   0  -8   75.69    8.70
  -5   0   9    2.60    3.70
   5   0   9    7.10   10.00
   5   0   9   17.00    8.70
   5   0  -9    0.50    2.40
   5   0   9   -8.00    8.60
  -5   0   9   -2.60    5.20
  -5   0  -9   -9.20    7.80
  -5   0  -9   -5.00    6.30
  -5   0 -10  573.94   38.60
   5   0  10  499.05   37.80
  -5   0  10  546.35   35.20
  -5   0 -10  559.14   36.80
  -5   0  11   -2.10    3.20
  -5   0 -11    0.30    6.00
  -5   1   0 7890.61  483.85
   5   1  -1 7426.36  454.85
   5  -1  -2  548.15   33.30
  -5   1  -2  560.54   35.30
  -5  -1   2  522.35   33.20
   5   1   2  568.24   33.90
   5  -1  -2  508.25   34.20
   5   1  -2  495.45   33.00
   5  -1   2  568.64   35.40
  -5  -1  -2  549.74   34.90
   5   1   3 2715.53  158.28
   5  -1   3 2457.15  158.58
   5  -1  -4 1841.72  102.59
   5   1   4 1598.44  103.39
   5   1  -4 1613.84  102.19
   5   1  -4 1728.23  102.19
   5  -1   4 1600.04  103.69
   5   1   5 1376.36   86.49
   5  -1  -5 1423.26   85.29
  -5  -1   5 1378.36   86.19
   5   1  -5 1367.56   84.99
   5  -1   5 1264.07   86.89
   5   1  -5 1432.66   84.79
  -5   1   5 1417.76   86.59
  -5  -1  -5 1461.95   88.79
   5   1   6  174.48   13.90
  -5  -1   6  161.78   13.20
   5   1   6  202.48   14.20
   5   1   6  161.38   14.60
  -5   1  -6  192.48   14.00
   5  -1  -6  174.78   12.10
   5  -1  -6  162.88   11.80
   5   1   6  190.48   17.90
   5   1   6  200.18   17.30
   5   1  -6  164.58   13.20
  -5   1   6  186.98   14.80
   5   1  -6  157.68   11.60
  -5   1   6  177.78   14.00
   5  -1   6  174.48   18.10
   5  -1   6  158.78   17.30
   5   1  -6  164.48   11.30
   5   1   7 2425.16  150.08
   5  -1  -7 2456.15  144.99
   5   1  -7 2516.15  144.29
   5  -1   7 2358.36  151.28
   5  -1   7 2305.57  150.88
   5   1  -7 2144.89  144.39
   5   1   8  264.97   26.50
  -5   1  -8  316.07   23.10
  -5   1  -8  334.67   23.20
   5   1   8  284.47   23.10
   5  -1  -8  291.67   20.10
   5   1   8  316.37   28.40
   5  -1  -8  325.77   20.60
  -5  -1  -8  287.87   22.40
   5  -1   8  283.77   28.50
   5  -1   8  331.87   24.80
   5   1  -8  290.67   19.30
   5   1  -8  310.97   22.70
  -5   1   8  307.97   23.80
   5  -1  -9  485.75   29.30
  -5  -1   9  454.95   30.10
   5  -1  -9  491.35   29.90
   5   1   9  490.45   39.00
  -5   1  -9  474.25   31.90
   5   1   9  435.46   36.90
  -5   1  -9  503.35   33.50
  -5  -1   9  428.96   32.00
   5  -1   9  458.95   39.30
  -5   1   9  438.36   32.40
  -5  -1  -9  417.06   33.50
   5  -1   9  408.36   33.60
  -5  -1  -9  447.76   32.00
  -5   1   9  471.25   30.20
  -5   1 -10  180.98   17.40
  -5  -1  10  180.48   14.10
  -5   1 -10  176.08   15.90
   5  -1 -10  189.18   11.90
  -5   1  10  195.88   14.20
  -5  -1 -10  159.08   16.10
  -5  -1  11  211.68   15.10
  -5   1 -11  199.48   16.00
   5  -1  11  195.98   25.20
  -5   1  11  230.78   15.10
   5  -2   0    1.30    1.80
   5  -2   0    5.10    2.00
  -5   2   0   10.90    2.40
   5  -2   0   10.30    2.70
  -5   2   0    4.00    1.90
   5  -2  -1  132.79    8.90
   5  -2  -1  128.69    8.70
  -5  -2   1  124.19    7.40
   5   2   1  106.99    8.00
   5   2   1  111.29    7.90
   5  -2  -1  120.19    7.90
  -5  -2  -1  121.89    8.70
   5  -2   1   98.19    8.90
  -5   2   1   99.09    8.10
   5  -2   1  116.19    9.20
   5  -2   1  114.09    9.40
   5   2  -1  114.49    7.40
  -5   2   1  120.99    8.40
   5   2   2   44.30    4.70
   5   2   2   42.20    4.10
   5  -2  -2   50.79    4.70
   5  -2  -2   44.40    3.80
   5  -2  -2   50.49    4.70
  -5   2  -2   46.10    7.50
   5   2   2   43.80    4.90
   5  -2   2   42.50    6.30
   5  -2   2   44.10    5.60
  -5   2   2   42.20    4.60
  -5  -2  -2   45.30    5.40
   5   2   3 2276.17  133.79
   5  -2  -3 2344.97  133.29
   5  -2   3 1923.41  134.49
  -5   2  -4  109.79   10.10
   5   2   4  112.39    9.00
   5   2   4  124.29   10.80
  -5  -2   4  116.29    8.00
   5  -2  -4  127.99    8.60
   5  -2  -4  110.49    8.40
   5   2   4  129.19   11.30
  -5  -2   4  117.99    7.90
  -5  -2  -4  105.69   11.10
   5  -2   4   91.89   10.40
  -5   2   4  117.79    9.20
  -5   2   4  112.29    9.50
   5  -2   4   88.19   11.50
   5  -2  -5 1692.43  104.29
   5   2   5 1806.92  105.39
   5  -2   5 1491.65  107.79
  -5  -2  -5 1915.01  108.19
   5  -2   5 1579.94  108.39
   5   2   6   35.50    5.60
   5   2   6   28.10    6.30
  -5   2  -6   32.50    6.20
   5   2   6   26.80    8.10
   5  -2  -6   31.10    4.20
  -5  -2   6   34.80    5.80
   5  -2  -6   33.20    4.90
   5   2   6   37.10    8.20
   5   2  -6   38.30    6.30
  -5   2   6   40.80    6.40
  -5  -2  -6   33.10    6.10
   5  -2   6   16.30    8.50
   5  -2   6   21.50   11.40
  -5   2   6   33.10    6.30
  -5   2  -7   -5.20    4.90
   5   2   7    4.60    5.50
   5   2   7   -0.60    6.60
   5   2   7   -9.80    7.10
  -5  -2   7   -0.60    3.50
   5  -2  -7    1.80    3.00
  -5   2  -7    9.70    4.90
   5  -2  -7    0.10    3.90
   5   2   7   -3.30    4.80
  -5  -2  -7    0.50    4.30
   5  -2   7   -8.00    5.90
  -5  -2  -7    3.90    4.50
  -5   2   7    2.70    4.90
   5  -2   7   -9.40    7.60
  -5   2   7    0.70    4.80
   5   2  -7    7.90    4.80
   5  -2   7    1.00    9.30
  -5   2  -8  152.18   14.20
  -5  -2   8  124.49   12.30
   5  -2  -8  125.29   10.80
   5  -2  -8  119.19   11.40
   5   2   8  122.19   16.80
   5   2   8  141.99   19.00
   5  -2   8  152.08   21.70
  -5  -2  -8  131.89   13.10
   5   2  -8  143.79   14.00
  -5   2   8  151.58   11.50
  -5  -2  -8  137.59   13.90
   5  -2   8  108.29   13.80
   5  -2   8  138.39   22.40
  -5   2   8  138.29   13.70
   5  -2   8  124.79   16.30
  -5   2  -9  119.19   13.50
   5  -2  -9  126.99   10.60
  -5   2  -9  123.89   14.70
   5   2   9  146.49   26.60
  -5  -2   9   99.19   12.20
   5  -2  -9  139.49   11.50
  -5  -2  -9  135.89   15.80
   5  -2   9  146.89   26.20
   5  -2   9  136.19   18.60
  -5   2   9  137.89   14.20
   5  -2   9  114.29   20.20
  -5  -2  -9  116.39   13.60
  -5   2   9  138.39   11.40
  -5   2   9  128.39   13.80
   5  -2 -10   98.49    8.60
  -5   2 -10   94.59   10.90
  -5  -2  10  109.89    9.90
   5  -2  10   72.99   13.50
   5  -2  10  128.69   18.10
  -5   2  10  110.19   10.00
  -5   2 -11    3.20    2.20
  -5  -2  11    4.50    2.90
  -5   2  11   -1.60    3.20
  -5  -2 -11  -15.80    6.30
   5  -3   0   71.49    5.70
   5   3   0   65.99    4.90
  -5  -3   0   70.99    5.40
   5  -3   0   71.89    6.50
   5  -3   0   79.49    6.50
  -5  -3   0   62.69    5.20
   5   3   1 1490.65   84.19
   5  -3  -1 1396.06   84.29
   5  -3   1 1232.98   84.89
   5   3   2   51.99    5.40
   5   3   2   66.29    5.40
  -5   3  -2   53.09    6.20
   5   3   2   58.29    4.80
   5  -3  -2   51.09    4.60
  -5   3   2   45.80    5.10
   5  -3   2   58.29    6.60
  -5  -3  -2   48.90    5.90
   5  -3   2   41.90    7.00
   5  -3   2   66.99    7.00
  -5   3   2   49.80    5.10
  -5   3  -3   51.19    6.20
   5  -3  -3   56.29    4.90
   5  -3  -3   56.19    5.80
   5   3   3   55.59    5.30
   5   3   3   52.99    6.70
  -5  -3  -3   49.30    7.00
   5  -3   3   54.69    8.00
   5  -3   3   51.19    7.60
  -5   3   3   50.59    6.00
  -5   3   3   54.09    5.70
   5   3   4   86.39    8.70
   5  -3  -4   79.29    6.70
   5   3   4   63.09    8.90
  -5  -3   4   68.59    5.60
   5   3   4   86.89    7.60
  -5   3   4   85.09    8.10
   5  -3   4   74.09   10.80
  -5   3   4   75.69    7.40
  -5  -3  -4   71.69    9.60
   5  -3   4   65.79    9.80
   5  -3  -5  132.89    9.40
   5   3   5  116.69   10.10
   5  -3  -5   95.09    8.90
   5   3   5  105.59   11.50
   5   3   5  112.79   12.40
  -5  -3   5  122.89    8.40
  -5   3   5  109.59   10.10
  -5  -3  -5  111.49   12.90
  -5   3   5  101.79   10.50
   5  -3   5   92.09   13.80
   5  -3   5   87.39   14.00
  -5  -3   6  187.08   13.20
   5   3   6  190.48   17.20
   5   3   6  185.18   18.00
   5  -3  -6  190.68   13.20
   5  -3  -6  161.88   12.60
   5   3   6  163.08   13.90
   5   3   6  190.88   14.60
  -5   3  -6  184.38   15.20
  -5   3   6  182.38   12.80
  -5  -3  -6  186.78   15.00
  -5   3   6  168.68   15.40
  -5  -3  -6  162.08   13.50
  -5   3   6  211.08   15.20
   5  -3  -7  201.18   14.40
   5   3   7  160.28   18.20
   5   3   7  161.48   15.00
   5  -3  -7  176.88   13.60
   5   3   7  185.58   19.70
  -5   3  -7  209.98   16.50
  -5  -3   7  199.68   14.50
  -5   3   7  170.98   16.40
   5  -3   7  185.28   23.70
  -5  -3  -7  188.48   14.80
   5  -3   7  159.58   18.00
  -5   3   7  198.88   16.20
   5   3  -7  200.98   16.10
   5  -3   7  166.58   22.80
  -5  -3  -7  175.58   16.20
  -5  -3  -7  212.68   15.70
  -5  -3   8  560.04   40.40
   5  -3  -8  644.44   39.90
   5  -3  -8  599.04   39.30
   5   3   8  580.24   45.00
  -5   3   8  653.83   42.50
  -5  -3  -8  625.34   39.30
   5  -3   8  616.44   50.29
   5   3  -8  628.14   41.90
  -5   3   8  634.24   41.90
  -5   3   8  628.24   39.30
  -5  -3  -8  629.64   40.70
   5  -3   8  637.84   52.09
  -5  -3  -8  536.25   41.60
   5  -3   8  662.73   44.60
  -5   3  -9   -1.70    6.30
  -5   3  -9    2.90    5.40
  -5  -3   9    5.10    5.00
  -5   3  -9    4.40    6.20
   5  -3  -9    4.10    5.40
   5  -3  -9    1.30    4.20
   5   3   9  -16.00    8.40
  -5   3   9    3.70    5.60
  -5  -3  -9   -5.10    6.00
  -5   3   9    2.20    4.10
  -5  -3  -9    8.30    7.90
   5  -3   9   -4.90   10.30
   5   3  -9    5.40    6.80
   5  -3   9  -15.50    8.20
   5  -3   9    7.80   12.40
   5  -3 -10   71.59    7.60
  -5   3 -10   70.89    8.10
   5   3  10   60.39    7.50
   5  -3  10   75.49   12.90
  -5  -3 -10   58.59    9.10
  -5   3  10   72.59    8.40
   5   3  11   63.39    5.90
   5  -3  11   56.99    9.90
  -5  -3 -11   49.60    7.20
  -5  -4   0    1.50    1.70
   5  -4   0    1.20    2.80
  -5   4   0    1.40    2.20
  -5   4   0    2.70    2.50
   5  -4   0    1.90    2.50
  -5   4  -1  317.77   20.30
  -5  -4   1  270.67   18.50
   5  -4   1  322.97   20.50
  -5   4   1  292.67   19.30
  -5  -4  -1  283.77   19.70
  -5   4   1  287.47   19.40
   5  -4   1  290.47   20.10
  -5   4  -2  998.60   66.09
   5   4   2 1158.08   64.89
   5  -4  -2 1077.79   64.89
   5  -4   2  951.70   67.39
   5  -4  -3   83.19    8.00
   5   4   3   90.69    6.90
   5   4   3   66.79    7.20
   5  -4  -3   74.69    6.70
   5   4   3   78.69    8.20
  -5   4   3   80.39    7.80
  -5  -4  -3   97.29    9.50
  -5   4   3   81.89    7.50
   5  -4   3   79.69    9.70
   5  -4   3   85.89    9.40
   5  -4  -4  560.54   36.00
   5  -4  -4  577.04   37.20
   5   4   4  579.14   37.70
   5   4   4  584.94   36.30
   5  -4   4  516.45   39.30
  -5   4   4  573.64   36.90
  -5  -4  -4  568.14   38.80
   5  -4  -5  764.02   50.79
  -5  -4   5  806.42   52.19
   5  -4  -5  799.92   50.69
   5   4   5  811.12   53.09
   5   4   5  773.52   52.99
  -5  -4  -5  833.92   51.59
  -5   4   5  851.31   52.19
  -5  -4  -5  832.42   54.59
  -5   4   5  806.62   51.89
  -5   4  -6   66.09   10.30
   5   4   6   34.00    8.90
   5   4   6   40.30    5.60
   5   4   6   43.80    8.30
  -5   4  -6   57.79    8.30
  -5  -4   6   49.80    5.60
   5  -4  -6   41.20    6.30
   5  -4   6   33.70   11.60
  -5  -4  -6   44.80    7.40
  -5   4   6   43.90    7.70
   5  -4   6   38.60   12.90
  -5   4   6   47.20    6.20
  -5  -4  -6   43.70   10.40
  -5   4   6   65.79    8.60
   5   4  -6   53.49    7.80
  -5  -4  -6   50.09    6.80
  -5  -4  -6   53.49    7.70
  -5  -4   7   52.69    7.00
   5   4   7   56.19   11.80
   5  -4  -7   56.19    8.50
  -5   4  -7   77.09   12.60
  -5   4   7   69.89    9.70
   5  -4   7   36.20   14.50
  -5  -4  -7   74.79   10.40
  -5   4   7   52.79    8.80
   5  -4   7   36.70   10.80
  -5  -4  -7   56.39    8.90
  -5  -4  -7   59.99    8.10
   5  -4   7   29.80   14.30
  -5   4  -8   69.29   10.70
   5   4   8   51.59   12.70
   5  -4  -8   77.39    9.00
  -5  -4   8   63.09    8.30
  -5   4   8   89.79   10.80
   5  -4   8   77.29   19.40
  -5   4   8   80.69   10.80
   5  -4   8   66.49   13.00
  -5  -4  -8   63.19    9.70
   5   4  -8   82.09   12.60
   5  -4   8   67.49   17.80
  -5  -4  -8   65.29   10.00
  -5   4   8   69.79    8.50
  -5   4  -9   -3.50    4.50
  -5   4  -9   -3.00    5.30
   5  -4  -9   -2.80    5.80
  -5   4  -9   -1.20    7.10
   5  -4  -9   -3.30    4.50
  -5   4   9   -0.30    4.20
  -5  -4  -9   -9.00    5.40
   5  -4   9    3.30   16.30
   5  -4   9  -10.00   10.50
   5   4  -9    7.70    7.50
  -5  -4  -9   -6.40   10.20
   5  -4 -10    3.30    3.90
   5   4  10   -4.80    3.20
  -5  -4 -10   -9.60    5.70
   5  -4  10   -0.60    9.40
  -5   4  10    1.60    3.70
  -5   4  11   21.90    3.40
  -5  -4 -11   25.80    5.60
   5  -4  11   21.60    8.00
  -5   5   0  562.44   35.00
   5  -5   0  495.55   34.60
   5  -5   0  583.04   35.80
  -5  -5   1   99.09    7.70
  -5   5  -1  100.49    9.10
   5  -5  -1  109.99    9.60
  -5  -5   1  102.69    7.80
  -5   5   1  113.29    8.70
   5  -5   1   89.59    9.10
   5  -5   1  101.49    9.20
  -5   5   1  126.49    8.70
   5  -5   1  114.79    9.80
  -5  -5  -1  105.79    9.10
   5  -5  -2  747.13   50.59
   5  -5  -2  870.61   52.09
  -5   5   2  776.62   50.99
  -5  -5  -2  866.01   52.29
   5  -5  -3  879.21   53.79
   5  -5  -3  904.21   55.19
   5   5   3  767.32   53.99
   5  -5   3  870.11   56.39
  -5   5   3  830.42   54.29
  -5   5   3  847.32   54.19
   5  -5   3  938.71   56.39
  -5  -5   4   98.79    8.00
   5  -5  -4  105.79   10.60
  -5  -5   4  127.69    7.60
   5   5   4  118.09   11.50
   5  -5  -4  112.09    9.50
  -5   5   4  113.59   10.40
  -5  -5  -4  106.59   10.80
  -5  -5  -4  124.09   13.20
   5  -5   4  142.89   14.30
  -5   5   4  117.79   10.90
   5  -5   4  128.09   14.20
   5  -5  -5  394.46   24.20
   5  -5  -5  374.66   25.10
  -5   5  -5  400.46   26.80
   5   5   5  353.06   27.20
   5  -5   5  314.67   30.40
   5   5  -5  417.56   30.80
  -5   5   5  369.66   26.30
  -5  -5  -5  379.36   29.10
  -5   5   5  353.16   24.10
  -5  -5  -5  390.86   25.90
  -5  -5  -5  367.86   26.10
  -5   5   5  365.16   26.10
  -5  -5   6  173.58   12.20
  -5   5  -6  164.98   15.10
   5   5   6  127.09   16.40
  -5   5  -6  193.68   17.60
   5  -5  -6  161.68   13.60
   5  -5  -6  145.99   12.40
   5   5  -6  179.58   15.50
  -5  -5  -6  149.29   14.30
  -5   5   6  184.78   15.60
   5  -5   6  127.49   21.20
  -5  -5  -6  168.48   13.00
  -5  -5  -6  158.18   15.40
  -5   5   6  161.98   12.20
  -5   5  -7 1377.06   83.09
   5  -5  -7 1231.28   80.09
   5   5   7 1154.68   82.89
  -5  -5  -7 1219.48   79.89
  -5  -5  -7 1376.86   81.79
   5  -5   7 1362.66  106.29
   5   5  -7 1298.07   81.99
   5  -5   7 1233.68   91.39
   5   5   8    1.30    3.60
   5   5   8   -5.70    8.70
  -5   5  -8    4.30    8.40
  -5   5  -8   11.40    5.30
   5  -5  -8    6.40    6.30
  -5  -5   8   14.70    3.90
   5  -5  -8    8.30    4.80
   5  -5   8    3.00   13.40
   5  -5   8  -15.40    9.80
  -5   5   8   15.10    7.30
  -5  -5  -8   -2.00    5.70
  -5  -5  -8   10.30    5.80
   5   5  -8   18.80    7.60
  -5   5   8    6.90    4.20
  -5  -5  -8    1.70    8.10
  -5   5   8   14.40    6.30
   5  -5  -9   32.00    7.30
  -5   5  -9   41.50    6.20
  -5   5  -9   40.90    8.90
   5  -5  -9   32.70    6.00
   5   5  -9   47.10    9.10
  -5   5   9   31.60    5.00
  -5  -5  -9   35.30    7.00
   5  -5   9   19.80   11.30
  -5   5 -10  171.48   15.20
   5  -5 -10  155.48   12.30
  -5   5  10  156.48   11.60
  -5  -5 -10  148.49   14.00
   5  -5  10  151.68   17.60
  -5  -5 -11  244.58   17.50
  -5   5  11  252.97   16.10
   5  -6   0    2.50    3.80
  -5   6   0   -0.40    3.40
  -5   6   0    2.30    3.00
  -5  -6   0   -0.80    2.70
   5  -6   0    1.40    3.70
  -5  -6   1   15.40    3.40
   5  -6  -1   19.70    5.00
   5  -6  -1   20.90    4.10
  -5  -6  -1   11.20    4.30
  -5   6   1   29.10    4.30
   5  -6   1   23.70    5.50
   5  -6   1   22.10    5.00
  -5   6   1   16.40    3.80
   5  -6  -2    4.70    4.20
  -5  -6   2    3.20    2.10
   5  -6  -2    4.60    3.20
  -5  -6  -2    8.40    4.60
  -5   6   2    2.70    3.40
   5  -6   2    9.20    4.70
   5  -6   2    9.90    4.70
  -5   6   2    5.70    3.40
   5  -6  -3   10.50    5.20
  -5  -6   3   16.40    2.60
  -5  -6   3   21.50    2.60
   5  -6  -3   24.20    4.70
  -5  -6  -3   17.80    6.10
  -5   6   3   13.20    4.30
  -5   6   3   18.00    6.70
   5  -6   3   21.10    5.90
   5  -6   3   22.10    6.30
   5  -6  -4  275.97   19.80
   5  -6  -4  320.17   19.70
   5  -6  -4  308.87   20.80
  -5   6  -4  317.87   23.60
  -5   6   4  266.37   21.10
   5   6  -4  288.57   19.80
  -5   6   4  306.37   19.50
  -5  -6  -4  314.27   29.70
  -5  -6  -4  256.97   22.20
   5  -6   4  317.57   25.20
   5   6  -4  309.17   21.80
   5  -6   4  295.87   24.40
  -5   6  -5   23.20    6.80
   5  -6  -5   32.10    4.80
   5   6   5   15.80    6.60
  -5   6  -5   26.60    8.50
   5  -6  -5   36.30    6.10
   5  -6  -5   28.00    5.00
  -5   6   5   31.40    4.30
  -5   6   5   31.10    6.60
  -5  -6  -5   22.00    8.40
   5   6  -5   31.80    6.80
   5   6  -5   26.40    4.30
   5  -6   5   27.90    7.40
  -5  -6  -5   26.30    6.30
   5  -6   5   23.70   10.20
   5  -6   5   24.10    5.50
  -5   6   5   23.10    6.40
   5  -6   5   26.80   10.10
   5  -6  -6   -0.80    3.50
   5  -6  -6    6.20    5.90
   5   6   6   -6.50    6.60
  -5  -6   6    3.60    3.00
  -5   6  -6   -4.30    8.90
   5  -6  -6   -3.00    5.50
   5  -6   6    4.80    9.90
  -5   6   6    1.60    5.50
   5  -6   6    0.10    5.10
  -5  -6  -6   -9.30    7.20
  -5   6   6   -0.10    3.60
  -5  -6  -6   10.10    4.00
   5  -6   6   -2.00   10.50
  -5   6   6    6.80    7.00
  -5  -6  -6   -0.80    6.70
   5  -6   6   -4.40    6.60
   5   6  -6   -5.60    3.10
  -5   6  -7    1.10    8.60
  -5   6  -7   -0.40    5.30
   5  -6  -7    7.50    4.80
   5   6   7   -3.10    7.60
   5   6  -7    9.50    7.50
  -5  -6  -7   10.10    4.90
  -5   6   7   10.20    6.20
   5  -6   7   -3.30   10.10
   5  -6   7   -2.50    8.50
  -5   6   7    5.90    4.10
  -5  -6  -7   -2.30    7.10
  -5   6   7    2.60    6.50
   5  -6   7   -1.80    6.50
   5  -6   7   -3.40   12.20
   5   6   8  166.98   23.40
   5  -6  -8  133.29   14.20
   5  -6  -8  154.88   13.20
  -5   6  -8  177.18   12.30
  -5  -6   8  147.29   11.90
  -5   6  -8  157.48   18.50
   5  -6   8  115.59   22.00
   5  -6   8  110.79   18.10
   5   6  -8  143.09   16.50
  -5   6   8  168.28   12.30
   5  -6   8  110.89   18.90
  -5  -6  -8  150.48   13.50
  -5   6   8  184.18   17.40
  -5   6  -9   -6.40    6.10
   5  -6  -9    2.40    4.70
   5  -6   9  -10.70    7.10
  -5   6   9    2.40    3.50
   5  -6   9   -9.30    8.50
  -5  -6  -9   -3.10    5.10
   5   6  -9   -3.70    5.90
   5  -6 -10   10.70    3.90
  -5   6 -10   12.40    5.10
  -5  -6 -10   10.70    4.80
   5  -6  10   10.30    6.70
  -5   6  10   17.30    3.10
   5  -7   0  750.42   49.20
   5  -7  -1  833.72   53.19
   5   7   1  751.02   51.19
   5  -7   1  862.21   53.39
   5  -7   1  814.82   52.99
   5   7  -1  796.42   50.89
  -5  -7  -1  843.02   52.89
   5  -7  -2  315.47   21.50
   5  -7  -2  328.27   24.00
   5   7   2  329.97   21.80
   5   7   2  354.46   21.90
   5  -7  -2  316.27   21.60
  -5  -7   2  315.57   21.80
   5   7  -2  304.87   21.50
   5  -7   2  313.27   23.90
  -5  -7  -2  334.57   24.20
   5  -7   2  347.47   27.00
   5   7   3  656.63   42.80
   5  -7  -3  653.93   43.70
   5  -7  -3  653.23   42.90
   5  -7  -3  714.33   43.10
  -5  -7   3  634.74   45.10
   5  -7  -3  770.12   46.10
  -5  -7  -3  717.93   43.80
  -5   7   3  745.43   43.90
   5   7  -3  650.63   42.70
   5   7  -3  652.13   44.50
   5  -7   3  618.64   45.90
   5   7  -3  696.33   43.20
  -5  -7  -3  717.43   46.30
   5  -7   3  652.13   46.30
   5  -7  -4 1030.10   68.49
   5  -7  -4 1092.59   69.39
   5   7  -4 1110.19   68.19
   5   7  -4 1118.29   70.49
   5  -7   4 1092.19   68.89
   5   7  -4 1120.39   68.59
  -5  -7  -4 1130.09   69.29
   5  -7   4 1080.49   73.39
   5  -7   4 1059.09   69.29
   5  -7   4 1225.88   73.99
  -5  -7  -4 1060.79   72.19
   5  -7  -5 1756.02  104.59
   5  -7  -5 1752.52  102.89
   5   7  -5 1658.23  103.49
   5  -7   5 1602.14  104.19
   5  -7   5 1583.54  110.09
   5   7  -5 1669.83  105.59
  -5  -7  -5 1577.14  107.69
   5  -7   5 1755.32  110.99
  -5   7   5 1631.34  104.69
   5  -7   5 1749.53  105.09
   5  -7  -6 3676.93  218.98
   5  -7  -6 3698.83  218.08
   5  -7   6 3221.68  225.28
   5  -7  -7   18.40    7.10
   5  -7  -7   37.00    6.30
  -5   7  -7   14.90    9.40
  -5  -7   7   35.30    5.20
  -5   7  -7   32.50    5.40
   5  -7   7   27.10    9.20
  -5   7   7   29.50    4.70
  -5  -7  -7   27.30    8.00
  -5  -7  -7   37.90    6.60
   5  -7   7   35.90   14.50
  -5   7   7   19.70   10.60
   5  -7   7   30.40    7.80
   5   7  -7   34.10    8.90
  -5   7  -8  359.26   27.70
   5  -7  -8  399.66   31.40
   5  -7  -8  366.16   24.20
  -5   7   8  365.86   22.80
  -5  -7  -8  320.07   24.80
   5  -7   8  317.77   26.70
  -5  -7  -8  354.86   24.30
   5   7  -8  324.47   26.70
   5  -7   8  330.17   27.70
   5  -7  -9  299.87   21.30
  -5   7  -9  314.87   23.20
  -5   7   9  348.67   20.00
   5   7  -9  302.07   23.60
   5  -7   9  276.07   25.10
   5  -7   9  283.57   24.20
  -5   7 -10    7.30    3.80
   5  -7 -10    8.30    3.40
  -5  -7 -10   11.60    4.00
   5  -7  10    6.50    4.60
   5  -7  10   11.00    5.20
   5  -8   0    8.10    3.60
   5   8   0    1.60    3.50
   5  -8   0    6.60    5.80
  -5  -8   0    6.20    4.80
   5   8   0    2.40    3.10
   5  -8   0    4.00    3.90
  -5  -8   1   34.80    6.20
   5   8   1   36.90    5.10
   5  -8  -1   42.40    6.40
   5   8   1   32.70    4.90
   5  -8  -1   38.00    5.80
   5  -8  -1   29.20    7.50
   5  -8   1   35.60    7.50
  -5  -8  -1   26.70    6.80
   5  -8   1   28.10    4.50
   5   8  -1   34.90    4.60
   5  -8   1   33.80    5.70
   5  -8   1   27.30    6.90
   5   8  -1   21.90    5.20
   5   8  -1   32.80    4.90
   5  -8  -2   79.69   11.30
  -5  -8   2   75.49    8.20
   5   8   2   65.49    7.30
   5  -8  -2   76.39    8.50
   5  -8  -2   69.89    8.00
   5  -8   2   87.69   11.60
   5   8  -2   69.99    7.90
  -5   8   2   74.69    8.80
   5   8  -2   55.89    8.70
   5  -8   2   56.29    7.70
   5   8  -2   76.99    7.20
   5  -8   2   56.09    9.40
  -5  -8  -2   52.09    9.40
   5  -8   2   69.99    7.70
  -5  -8   3  679.83   45.80
   5  -8  -3  759.72   45.40
   5   8   3  699.23   45.00
   5  -8  -3  673.73   45.40
  -5   8  -3  804.92   47.80
   5  -8  -3  724.33   45.50
   5  -8  -3  712.73   48.60
   5  -8   3  735.83   49.40
   5   8  -3  675.63   46.90
   5  -8   3  719.73   45.50
   5  -8   3  681.83   45.70
  -5  -8  -3  724.03   48.90
  -5  -8  -3  681.23   45.80
   5   8  -3  694.73   45.00
   5   8  -3  720.33   45.40
  -5   8   3  779.32   46.20
   5  -8   3  693.83   48.80
   5  -8  -4  141.09   12.00
   5   8   4  142.09   11.30
   5   8  -4  149.79   14.60
   5   8  -4  152.58   11.20
   5  -8   4  142.49   13.10
   5  -8   4  150.88   17.60
  -5   8   4  154.38   13.50
   5   8  -4  141.39   13.50
   5  -8   4  154.48   17.60
   5  -8   4  158.08   12.50
  -5  -8  -4  131.59   16.40
   5  -8  -5  668.93   46.20
  -5  -8   5  760.22   46.70
   5  -8  -5  745.73   45.00
  -5   8  -5  785.72   49.20
   5  -8  -5  675.03   45.10
   5  -8  -5  732.53   44.30
  -5   8  -5  712.43   45.50
   5  -8   5  711.23   46.30
   5  -8   5  681.03   51.79
   5  -8   5  695.23   52.49
  -5  -8  -5  675.23   45.90
   5   8  -5  637.64   44.60
   5  -8   5  662.13   45.50
  -5   8   5  787.12   43.90
  -5   8   5  715.93   46.00
   5   8  -5  643.24   47.10
  -5  -8  -5  641.14   50.49
   5  -8  -6   91.89   10.80
   5  -8  -6   93.59    9.80
   5  -8  -6   94.09   13.50
   5  -8  -6   84.19   12.00
  -5   8  -6   91.59   10.10
  -5   8  -6  109.39   14.50
  -5  -8   6  117.59    9.10
   5  -8   6  101.19   11.90
   5   8  -6   95.59   14.40
   5  -8   6   98.69   17.70
  -5   8   6  112.99    8.70
  -5   8   6   89.79   11.50
  -5  -8  -6   88.89   12.90
   5  -8   6  102.89   13.00
   5   8  -6   84.39    9.30
  -5   8  -7   19.90    2.50
   5  -8  -7   11.40    5.20
  -5   8  -7    4.70    8.40
   5  -8  -7   10.10    8.00
   5  -8   7   18.30    7.80
  -5  -8  -7   19.10    5.20
   5   8  -7   16.20    8.00
  -5  -8  -7   19.10    7.20
   5  -8   7   20.40    6.70
  -5   8   7   18.10    3.70
  -5   8  -8   40.70    8.60
   5  -8  -8   53.49    6.80
   5  -8   8   52.59    8.30
   5  -8   8   50.89    9.20
   5   8  -8   48.70    8.90
  -5   8   8   56.89    5.50
  -5  -8  -8   44.30    7.40
   5  -8  -9    4.30    4.00
  -5   8  -9   -1.70    4.40
   5   8  -9    0.40    4.70
   5  -8   9    2.50    5.00
   5  -8   9    3.60    4.80
  -5  -8  -9    1.80    3.80
  -5  -9   0  486.95   34.00
   5  -9   0  488.35   32.00
   5  -9   0  460.95   31.80
   5  -9   0  501.15   35.10
   5   9   0  485.25   31.80
   5  -9   0  512.15   35.60
   5  -9  -1   71.79    8.70
   5  -9  -1   80.89   11.70
   5  -9  -1   70.49    9.40
   5   9   1   62.39    7.80
  -5  -9   1   61.09    9.00
   5  -9   1   64.89    8.80
   5  -9   1   70.89   10.90
  -5  -9  -1   83.69    8.50
   5   9  -1   73.59    8.00
  -5  -9  -1   63.49    9.90
   5  -9   1   75.79   11.40
   5  -9   1   69.69    8.60
   5   9  -1   75.49    8.90
   5  -9  -2 1419.06   90.69
   5   9  -2 1256.17   88.19
  -5  -9  -2 1450.35   87.49
   5  -9   2 1386.46   87.19
   5  -9   2 1413.46   90.39
  -5  -9  -2 1389.56   90.19
   5  -9   2 1523.95   91.19
   5  -9  -3  173.88   13.20
  -5   9  -3  175.08   15.70
   5   9   3  132.89   12.10
   5  -9  -3  140.09   16.80
   5  -9  -3  169.08   13.90
  -5  -9   3  133.49   14.50
  -5   9   3  195.98   18.50
  -5  -9  -3  170.18   14.10
   5   9  -3  140.49   15.10
  -5  -9  -3  158.68   22.10
   5  -9   3  153.98   13.30
   5  -9   3  146.69   17.10
   5  -9   3  152.58   12.90
   5   9  -3  162.28   12.90
  -5  -9   4 1551.04  107.49
   5  -9  -4 1749.43  106.59
  -5  -9  -4 1693.03  110.59
   5   9  -4 1653.63  108.29
   5  -9   4 1852.61  112.29
   5  -9   4 1855.81  112.19
   5  -9  -5  574.34   37.70
   5  -9  -5  583.34   36.80
  -5   9  -5  591.24   37.30
  -5   9  -5  606.94   40.80
   5  -9  -5  621.54   37.70
   5  -9   5  569.64   44.00
   5   9  -5  535.55   37.10
  -5   9   5  607.74   38.50
   5  -9   5  550.54   38.00
  -5  -9  -5  577.24   38.50
   5  -9   5  580.34   38.60
   5   9  -5  530.45   39.80
   5  -9  -6 1336.97   80.49
   5  -9  -6 1363.26   81.09
   5  -9   6 1281.57   93.49
   5   9  -6 1153.68   82.69
   5  -9   6 1353.06   82.19
  -5   9  -7  226.18   20.80
   5  -9  -7  240.48   18.00
  -5  -9  -7  249.78   18.80
   5   9  -7  221.68   20.30
  -5  -9  -7  240.58   17.80
   5  -9   7  247.08   19.30
   5  -9   7  248.18   19.20
  -5  -9  -7  282.97   18.10
   5  -9  -8  305.87   22.30
  -5   9  -8  369.76   26.10
   5  -9   8  330.47   23.30
   5   9  -8  328.77   26.30
   5  -9   8  299.87   23.30
  -5  -9  -8  349.67   22.40
  -5   9  -9   87.99    8.40
   5  -9  -9   96.79    8.00
   5   9  -9   73.69    8.70
   5  -9   9  102.29    8.80
   5  -9   9   91.59    8.50
  -5  -9  -9   89.29    7.40
   5 -10   0    4.30    4.40
   5 -10   0    2.80    6.80
   5 -10   0    7.90    5.60
   5 -10   0    1.80    7.00
   5  10   0   -0.80    4.40
  -5 -10   0   -3.30    5.90
   5  10   0   -3.50    4.30
  -5 -10   1   10.40    6.20
   5 -10  -1    7.00    7.60
   5  10   1    6.20    4.60
   5 -10  -1    7.50    7.80
   5 -10  -1   13.60    5.80
   5 -10  -1   17.40    5.30
   5 -10   1   11.60    4.70
  -5 -10  -1   12.20    4.70
   5  10  -1    7.60    5.50
   5 -10   1   18.30    8.40
   5  10  -1    4.60    5.20
   5 -10   1   10.50    7.40
  -5 -10  -1    3.80    6.60
   5 -10   1    8.20    4.90
   5 -10  -2  242.48   23.60
   5  10   2  279.27   19.40
  -5 -10   2  291.17   21.30
   5 -10  -2  286.17   20.00
   5 -10  -2  275.67   20.30
   5 -10   2  253.17   19.80
  -5 -10  -2  282.47   23.30
   5  10  -2  257.57   19.70
   5 -10   2  291.67   20.00
   5 -10   2  272.57   24.00
   5 -10   2  265.67   23.90
  -5 -10  -2  274.27   20.00
   5 -10  -3  543.15   33.40
   5 -10  -3  559.54   33.10
  -5 -10   3  445.96   33.80
  -5  10  -3  548.05   35.30
   5  10   3  512.95   32.40
   5  10  -3  499.45   32.80
   5 -10   3  460.45   37.20
   5 -10   3  510.55   33.30
  -5 -10  -3  513.35   33.60
   5 -10   3  482.15   37.60
  -5 -10  -3  451.95   36.50
   5  10  -3  453.35   34.60
   5 -10   3  471.25   32.90
   5  10   4   56.29    7.20
   5 -10  -4   74.29   10.10
  -5  10  -4   61.79    9.90
   5 -10  -4   61.49   12.30
   5 -10  -4   65.39    9.30
   5 -10  -4   61.99    9.00
   5 -10   4   74.59    9.70
   5 -10   4   66.59    9.50
   5  10  -4   45.90    8.50
  -5 -10  -4   53.09    8.30
   5  10  -4   79.69    8.60
   5 -10  -5  613.64   40.10
   5 -10  -5  636.14   41.30
   5 -10  -5  660.73   41.20
  -5  10  -5  676.43   39.80
  -5  10  -5  710.73   43.80
   5  10  -5  559.44   43.10
   5 -10   5  683.83   42.00
   5  10  -5  565.84   40.60
   5 -10   5  644.24   41.60
  -5 -10  -5  658.23   42.00
   5 -10  -6   28.00    4.90
   5 -10  -6   27.50    5.40
  -5  10  -6   14.70    6.70
   5 -10   6   33.50    5.50
   5  10  -6   28.30    7.40
   5 -10   6   27.90    5.70
  -5 -10  -6   19.30    6.10
   5 -10  -7  127.99   10.80
  -5  10  -7  104.69   12.30
   5 -10   7  135.59   11.50
  -5 -10  -7  111.49    9.60
   5 -10   7  128.59   11.30
   5  10  -7  101.69   17.90
  -5 -10  -7  106.39   11.10
   5 -10  -8   39.70    5.70
  -5  10  -8   25.30    4.80
   5 -10   8   36.10    5.50
   5  10  -8   24.30    4.80
  -5 -10  -8   25.70    4.20
   5  11   0  315.17   21.70
  -5 -11   0  313.37   24.50
   5 -11   0  245.88   26.00
   5 -11   0  262.37   25.50
   5 -11   0  322.17   21.90
  -5 -11   0  292.17   21.30
   5 -11   0  329.57   22.00
  -5  11  -1   79.79   11.30
   5 -11  -1   44.60   10.60
   5 -11  -1   42.20   14.20
   5 -11  -1   69.89   10.50
  -5 -11   1   75.59   11.70
   5  11   1   69.49    8.10
   5 -11  -1   67.89    9.90
   5 -11   1   68.79   15.80
   5 -11   1   67.59   10.00
   5  11  -1   67.29    9.70
  -5 -11  -1   52.49   10.60
   5 -11   1   66.39    9.70
  -5 -11  -1   65.19    9.50
   5 -11   1   57.39   11.40
   5 -11  -2 1006.20   66.09
   5 -11  -2  908.51   66.49
  -5 -11  -2 1045.30   66.19
   5 -11   2 1055.09   62.49
   5  11  -2  889.91   63.19
   5 -11   2 1022.20   67.19
   5 -11  -3  894.01   53.59
   5  11   3  854.41   53.09
  -5 -11  -3  818.42   53.89
   5 -11   3  832.02   53.69
   5 -11   3  827.42   53.79
   5 -11  -4   70.79    9.20
   5 -11  -4   78.89   10.00
  -5  11  -4   74.09    6.80
   5 -11  -4   65.29    8.80
   5  11   4   70.89    7.40
  -5  11  -4   70.49   11.90
   5 -11   4   79.69    9.50
   5 -11   4   85.89    9.90
   5  11  -4   69.89    8.50
  -5 -11  -4   81.09   10.40
   5 -11  -5 1123.49   67.09
   5  11  -5  943.41   68.09
   5 -11   5 1148.19   67.39
   5 -11  -6   90.89    8.80
  -5  11  -6   94.39   12.10
   5  11  -6   72.29   10.30
  -5 -11  -6   74.89    9.10
   5 -11   6   91.09    8.90
   5 -11   6   96.89    9.10
  -5 -11  -6   59.39   10.00
   5 -11  -7  261.17   18.20
  -5  11  -7  262.87   18.70
  -5 -11  -7  257.97   17.70
   5  11  -7  228.68   18.60
   5 -11   7  287.07   18.30
   5 -11   7  302.87   19.60
   5  12   0   -0.60    4.60
  -5  12   0   13.60    5.60
   5  12   0    1.10    4.20
   5 -12   0    6.70    5.00
  -5 -12   0    8.00    4.70
   5 -12   0    5.90    5.20
  -5  12  -1   -0.30    5.40
   5  12   1    0.20    3.90
  -5 -12   1    6.80    4.30
   5 -12  -1   -0.80    4.80
   5 -12  -1    7.00    5.70
   5  12   1    0.90    4.00
   5  12  -1    5.20    4.40
   5 -12   1    5.60    5.00
   5  12  -1    3.50    4.70
   5 -12   1    9.20    4.60
  -5 -12  -1    6.10    4.90
  -5  12  -2  108.39   12.70
   5 -12  -2  110.69   11.50
   5 -12  -2  113.09   11.20
  -5 -12   2  114.29   10.20
   5  12   2  101.29   10.00
  -5 -12  -2  107.99   11.50
   5 -12   2  109.39   11.10
   5 -12   2  120.39   11.00
   5  12  -2   91.39   10.30
  -5  12  -3   30.90    7.10
   5  12   3   27.00    4.50
   5 -12  -3   27.90    6.10
   5  12  -3   21.30    5.80
  -5 -12  -3   32.00    6.40
   5 -12   3   29.40    5.60
   5  12  -3   34.80    5.20
   5 -12   3   33.40    5.50
   5 -12  -4   38.90    5.70
  -5  12  -4   25.50    6.10
   5 -12  -4   28.60    4.20
   5 -12   4   49.60    7.70
  -5 -12  -4   34.80    5.10
   5  12  -4   48.40    6.40
  -5 -12  -4   37.80    6.10
   5  12  -4   26.20    6.40
   5 -12   4   38.60    6.30
   5 -12  -5   40.30    6.10
   5 -12  -5   43.20    5.50
  -5  12  -5   38.80    6.30
  -5 -12  -5   45.80    7.50
   5 -12   5   50.99    6.30
   5  12  -5   35.40    5.90
  -5 -12  -5   41.20    6.40
   5 -12   5   56.59    6.80
   5 -12  -6   -1.40    2.90
  -5  12  -6   -0.10    3.40
   5 -12   6    2.80    2.90
  -5 -12  -6   -2.20    3.10
  -5 -12  -6   -1.20    3.10
   5 -12   6    4.20    2.80
   5  12  -6   -2.40    5.10
  -5 -13   0  303.27   21.20
  -5 -13   0  314.47   21.50
   5 -13   0  315.27   21.80
  -5  13   0  350.66   22.80
   5 -13   0  316.97   21.50
   5  13   0  306.87   21.20
  -5 -13   1  125.09   10.10
  -5  13  -1  125.29   12.20
   5  13   1   98.69   10.50
  -5 -13   1  122.59   10.20
   5 -13  -1  126.19   11.20
   5 -13  -1  113.79   10.60
   5 -13   1  139.69   13.20
  -5 -13  -1  114.39   10.40
  -5 -13  -1  112.69   10.60
   5 -13   1  123.69   10.80
   5  13  -1  118.89   10.20
  -5 -13   2  155.58   12.00
  -5  13  -2  183.58   16.20
   5  13   2  159.78   11.70
   5 -13  -2  163.88   13.50
  -5 -13  -2  163.68   12.70
   5 -13   2  156.68   12.70
  -5 -13  -2  144.89   12.40
   5  13  -2  185.38   13.70
  -5 -13   3  186.88   13.50
   5 -13  -3  188.18   13.40
   5 -13  -3  192.58   14.20
  -5  13  -3  210.58   15.60
   5 -13   3  204.88   14.30
  -5 -13  -3  195.68   14.50
  -5 -13  -3  195.48   13.90
   5 -13   3  192.18   14.10
   5 -13  -4  134.89   10.30
  -5  13  -4  151.48   11.90
   5  13  -4  118.59   11.90
  -5 -13  -4  154.98   11.00
  -5 -13  -4  135.99   10.40
   5 -13   4  142.89   10.90
   5 -13   4  147.39   10.70
  -5  14   0    1.20    3.40
  -5 -14   0   -0.50    2.20
   5 -14   0   -0.50    2.70
  -5 -14   0    1.70    2.50
   5 -14   0    2.40    3.30
   5 -14  -1  123.69    9.70
  -5 -14   1  120.69    9.30
  -5  14  -1  136.19   10.60
   5 -14  -1  117.29    9.30
  -5 -14  -1  128.09    9.50
   5 -14   1  127.19    9.80
   5 -14   1  121.59    9.50
  -5  14   1  134.09   10.80
  -5 -14   2   -2.00    2.10
  -5  14  -2   -0.20    3.00
   5 -14  -2   -2.20    2.80
   5 -14  -2   -2.80    2.30
  -5  14   2    0.90    3.10
   5 -14   2    2.90    2.80
   5 -14   2    0.40    2.50
  -5 -14  -2    0.50    2.40
  -6   0   0  365.26   26.60
  -6   0   0  418.06   26.60
   6   0   0  464.55   26.40
  -6   0   1    2.40    1.40
   6   0  -1    3.10    0.90
   6   0   1    1.50    2.10
  -6   0  -1    1.40    2.60
   6   0   1    0.60    2.00
   6   0   1   -0.60    1.80
  -6   0   1    0.60    1.20
   6   0   2  668.83   38.90
   6   0   2  583.34   37.60
  -6   0  -2  537.25   38.80
   6   0   3    1.30    3.20
   6   0   3    1.80    2.60
   6   0  -3    2.40    1.40
   6   0   3    0.60    3.40
  -6   0  -3    0.30    3.60
   6   0   4 5441.16  347.27
   6   0  -4 5940.31  346.47
  -6   0  -5    3.60    4.60
  -6   0   5    3.00    2.50
   6   0   5   -7.50    4.90
   6   0   5    4.30    4.50
  -6   0   5    4.30    3.00
   6   0   5    0.70    5.10
   6   0  -6  701.33   46.10
   6   0   6  678.73   46.50
  -6   0  -6  769.02   46.60
   6   0  -6  642.54   45.10
   6   0   6  771.32   50.29
  -6   0   6  740.93   46.70
   6   0   6  747.83   46.90
   6   0  -6  744.73   44.80
   6   0  -7    0.10    3.50
  -6   0  -7   -2.70    4.80
   6   0   7  -11.30    7.30
   6   0   7   -3.20    7.40
  -6   0   7    4.00    4.00
   6   0  -7    5.90    3.00
   6   0  -7    1.60    2.20
   6   0   7   -6.20    5.80
  -6   0  -7   -1.00    3.50
  -6   0   7   -0.10    4.30
  -6   0   8  149.39   14.40
   6   0  -8  180.78   11.20
   6   0   8  117.59   18.80
  -6   0  -8  133.19   15.20
   6   0  -8  175.48   11.20
   6   0   8  161.28   16.70
   6   0   8  193.08   27.50
   6   0  -8  159.38   11.70
   6   0   9   -7.00    8.00
   6   0   9  -10.40   17.20
  -6   0   9    6.30    3.50
  -6   0  -9   -5.60    6.80
   6   0   9    8.80   10.30
  -6   0  -9    0.90    9.00
  -6   0   9    8.30    5.50
  -6   0  10  567.54   35.60
  -6   0 -10  543.15   37.70
  -6   0 -11    2.20    4.80
  -6   0  11   -2.00    2.80
  -6   1   0    4.60    2.00
  -6   1   0    1.70    2.00
  -6  -1   0   -0.60    1.60
   6  -1   0    0.50    1.80
   6   1   0    1.50    0.90
   6  -1   0    0.70    1.90
  -6  -1   0    2.10    1.70
   6   1   0    1.40    0.80
   6   1   0   -1.70    1.40
   6   1  -2 2144.39  130.49
  -6  -1   3  198.78   13.00
   6   1   3  173.18   13.50
   6   1   3  196.48   15.00
  -6   1  -3  202.28   15.80
   6   1   3  220.08   15.40
  -6  -1   3  222.98   13.00
   6  -1  -3  208.48   12.80
   6   1  -3  198.38   12.40
   6  -1   3  188.38   15.60
   6   1  -3  173.18   12.40
  -6  -1  -3  172.48   15.20
  -6   1   3  194.48   13.40
  -6   1   3  220.88   13.80
   6  -1   3  183.48   14.30
   6  -1   3  188.28   15.50
   6   1   4   67.79    7.10
  -6  -1   4   72.49    6.10
  -6  -1   4   83.79    6.10
  -6   1  -4   62.09    8.80
   6   1   4   69.49    9.30
   6   1   4   73.39    8.90
   6  -1  -4   74.29    5.70
   6  -1   4   59.59    7.70
  -6   1   4   66.69    6.60
   6  -1   4   60.29    9.10
  -6   1   4   77.19    7.00
   6   1  -4   79.89    5.10
   6   1  -4   68.29    5.10
   6  -1   4   60.89    9.30
  -6  -1  -4   66.49    9.20
   6   1   5   -0.70    4.90
   6  -1  -5    2.50    3.60
   6   1   5    1.80    4.00
   6   1   5    3.60    5.80
  -6  -1   5    3.00    2.20
  -6  -1   5    8.40    2.80
  -6   1   5    1.60    2.90
   6  -1   5   -9.30    5.00
   6  -1   5   -1.70    5.30
   6  -1   5   -8.50    5.40
   6   1  -5    3.20    1.60
  -6   1   5    4.60    3.30
  -6  -1  -5   -4.60    4.30
   6   1  -5    2.50    1.70
   6  -1  -6   33.70    4.60
  -6  -1   6   31.90    5.00
   6   1   6   27.90    8.30
   6   1   6   48.90    8.40
   6   1   6   32.30    8.70
  -6   1  -6   36.40    6.20
   6  -1  -6   32.70    4.50
   6  -1   6   24.30    6.40
  -6  -1  -6   37.80    5.50
   6   1  -6   34.10    3.80
  -6  -1  -6   30.70    5.70
   6   1  -6   35.10    3.40
  -6   1   6   41.80    6.40
   6  -1   6   21.30    5.60
  -6   1   6   36.10    5.90
   6  -1   6   18.80    8.40
   6   1  -6   44.70    6.10
   6  -1   6   12.90    8.00
   6  -1  -7  364.86   22.90
   6  -1  -7  334.97   22.40
   6   1   7  325.77   28.40
   6   1   7  377.96   25.50
  -6   1  -7  339.97   25.20
  -6  -1   7  324.97   24.10
   6   1   7  337.57   29.40
  -6   1   7  357.86   24.90
   6  -1   7  330.17   25.90
   6   1  -7  335.37   24.50
  -6  -1  -7  377.26   23.70
   6  -1   7  335.37   29.90
  -6   1   7  373.96   25.60
   6   1  -7  342.47   21.70
  -6  -1  -7  357.06   24.70
   6  -1   7  331.77   30.50
  -6  -1   8   -0.20    4.60
   6   1   8  -17.60    8.40
  -6   1  -8   -0.10    4.60
  -6   1  -8   -6.30    6.20
   6  -1  -8    4.90    3.90
   6   1   8    1.40    6.80
   6  -1  -8    1.60    3.00
   6   1   8    0.10    8.60
   6  -1   8  -14.00    8.60
   6  -1   8   -3.70   10.40
   6  -1   8  -10.20    7.00
  -6   1   8   -1.20    5.10
  -6  -1  -8   -3.20    5.60
  -6   1   8    7.20    3.30
  -6   1  -9   -6.70    6.40
   6   1   9  -12.70    9.50
   6  -1  -9    3.60    3.00
   6   1   9   14.20   11.70
   6  -1  -9   -0.40    3.40
   6  -1  -9   -4.60    5.30
  -6  -1   9    2.90    5.00
   6  -1   9   -6.70   10.90
  -6   1   9    2.20    3.90
  -6  -1  -9    4.00    8.80
  -6   1   9   -0.10    5.40
   6  -1   9   -3.20    8.50
   6  -1   9   10.80   14.70
  -6  -1  -9   -8.00    6.60
  -6  -1  10  358.56   24.20
  -6   1 -10  369.16   26.10
  -6  -1 -10  347.37   26.50
   6  -1  10  363.06   30.00
  -6   1  10  372.86   24.10
  -6  -1  11   85.39    7.50
  -6   1 -11   76.99    8.50
  -6   1  11   93.39    7.80
  -6  -1 -11   74.49   10.00
   6  -2   0  563.74   34.50
   6   2   0  520.75   34.00
   6  -2   0  567.14   35.50
  -6   2  -1   39.80    5.60
   6  -2  -1   46.10    5.10
   6  -2  -1   49.10    4.00
  -6  -2   1   41.30    3.50
   6   2   1   45.60    4.10
   6   2   1   37.10    4.10
   6  -2  -1   49.60    5.00
   6  -2   1   46.10    5.60
   6  -2   1   53.79    5.90
  -6  -2  -1   40.70    4.90
  -6   2   1   40.10    4.30
  -6   2   1   52.29    4.70
   6   2  -1   48.60    3.40
   6  -2   1   38.60    5.10
   6  -2  -2 1153.58   64.39
  -6   2  -2  952.10   66.39
   6   2   2 1004.90   65.29
   6   2   2 1067.59   64.79
  -6   2  -4  192.18   15.80
  -6  -2   4  214.18   13.00
   6  -2  -4  189.48   13.20
   6   2   4  201.28   16.10
   6   2   4  194.08   15.70
   6   2   4  191.98   14.20
   6  -2  -4  209.78   12.90
  -6  -2  -4  181.78   16.40
   6  -2   4  179.18   16.80
  -6   2   4  202.08   14.20
  -6   2   4  191.88   14.40
   6  -2   4  182.28   17.10
   6  -2  -5 1445.66   84.09
   6   2   5 1416.46   87.39
  -6  -2  -5 1299.37   87.89
   6  -2   5 1281.87   88.59
   6   2   6  111.79   11.10
   6  -2  -6  112.49    9.20
  -6  -2   6  131.69   10.20
   6   2   6   96.59   14.60
  -6   2  -6  137.99   13.20
   6  -2  -6  146.69   10.10
   6   2   6  130.59   12.20
   6   2   6  147.69   14.60
   6   2   6  137.09   11.90
   6   2  -6  113.09   11.50
  -6   2   6  129.99   11.60
   6  -2   6   85.79   14.80
  -6   2   6  126.19   11.90
  -6  -2  -6  117.69   10.60
   6  -2  -7  147.79   10.80
   6   2   7  100.79   15.30
   6  -2  -7  120.29   10.10
  -6   2  -7  165.68   14.30
   6   2   7  118.19   12.50
  -6  -2   7  126.59   11.40
   6   2   7  141.19   13.90
   6   2   7  173.08   17.20
  -6  -2  -7  135.19   12.60
  -6   2   7  143.09   10.70
  -6   2   7  116.09   13.20
   6  -2   7  107.09   17.70
  -6  -2  -7  141.19   12.60
   6  -2   7  118.69   18.80
  -6   2   7  148.79   13.00
   6   2  -7  131.59   12.80
   6  -2  -8   14.30    5.10
  -6   2  -8   33.00    6.70
  -6  -2   8   20.20    5.40
   6  -2  -8   23.30    4.20
   6   2   8    4.20   10.20
  -6   2  -8   16.90    7.70
   6   2  -8   22.20    6.30
  -6   2   8   25.30    7.30
  -6   2   8   21.80    4.20
   6  -2   8   23.00   12.60
  -6  -2  -8   35.10    8.40
   6  -2   8    5.20    9.30
  -6   2   8   24.40    6.60
  -6  -2  -8   14.60    6.00
   6  -2  -9  229.28   14.60
  -6   2  -9  234.48   18.20
  -6  -2   9  171.68   19.90
   6  -2  -9  206.18   14.90
  -6  -2  -9  184.88   17.40
   6  -2   9  182.58   27.20
  -6  -2  -9  183.28   19.10
   6  -2   9  200.78   21.90
   6  -2   9  194.08   28.60
   6  -2 -10    8.40    2.80
  -6   2 -10    4.00    5.60
   6  -2  10    7.40   10.10
  -6  -2  11  357.56   27.50
   6   2  11  384.96   23.90
  -6   2 -11  387.46   23.30
  -6  -2 -11  316.67   25.40
  -6   2  11  386.56   23.90
  -6   3   0    0.80    2.40
   6  -3   0    5.50    2.40
   6   3   0    2.90    1.40
   6  -3   0    4.10    2.60
  -6   3   0    2.10    2.20
   6  -3   0    3.80    2.80
  -6  -3   0    1.30    1.70
   6  -3  -1  117.69    8.70
   6  -3  -1  107.99    8.90
   6   3   1  101.69    7.60
  -6  -3   1  119.49    7.20
  -6  -3   1  103.19    7.20
  -6   3  -1   99.89    9.10
   6  -3  -1  100.49    7.60
   6  -3   1  104.39    8.80
  -6   3   1  109.89    8.30
  -6   3   1  106.49    8.10
   6   3  -1   96.89    6.80
   6  -3   1  101.49    9.30
  -6  -3  -1  112.59    8.60
   6  -3   1  118.89    9.40
   6   3   2    7.10    2.60
   6   3   2    8.60    2.60
   6  -3  -2    7.60    2.20
  -6   3  -2    1.60    3.20
   6  -3  -2    6.40    2.80
   6  -3  -2    9.90    3.10
  -6  -3  -2    2.00    3.20
   6  -3   2   12.80    4.20
   6  -3   2    5.70    3.60
  -6   3   2    5.10    2.60
   6  -3   2    4.40    5.10
   6  -3  -3   10.90    3.20
   6   3   3   14.40    3.40
  -6   3  -3   10.30    4.10
   6  -3  -3   12.40    3.40
   6   3   3   12.60    3.30
   6  -3  -3   13.90    2.80
   6   3   3   11.00    3.90
   6  -3   3    1.90    6.20
  -6  -3  -3   14.50    4.90
  -6   3   3    5.50    3.00
   6  -3   3   14.00    5.20
   6  -3   3   12.90    5.10
   6  -3  -4 1895.11  115.19
   6   3   4 1986.40  115.99
   6   3   4 1751.62  117.09
   6   3   5  118.49   14.90
   6  -3  -5  129.79   10.20
   6   3   5  135.49   11.20
   6   3   5  131.49   13.20
  -6  -3   5  144.49    9.50
   6  -3  -5  139.49    9.80
  -6  -3  -5  126.79   14.50
   6  -3   5  106.49   15.40
   6  -3   5   99.99   14.90
  -6   3   5  130.69   11.90
  -6   3   5  133.09   11.30
   6   3   6  178.98   17.80
   6   3   6  195.18   19.20
   6   3   6  172.78   14.50
   6   3   6  215.28   16.00
   6  -3  -6  183.08   13.60
  -6   3  -6  200.78   16.80
  -6  -3   6  208.78   14.00
  -6  -3  -6  189.78   14.70
  -6   3   6  207.88   16.40
   6   3  -6  211.48   15.70
  -6  -3  -6  169.88   16.00
  -6   3   6  216.58   15.90
   6   3   7   48.60   10.70
   6  -3  -7   55.39    7.40
   6   3   7   34.70   10.50
   6   3   7   39.50    6.80
  -6   3  -7   54.29    9.90
   6  -3  -7   38.10    5.70
  -6  -3   7   49.00    6.70
  -6  -3  -7   51.89    7.00
  -6   3   7   57.89    6.70
   6  -3   7   48.90   14.40
   6  -3   7   43.90   10.60
  -6  -3  -7   43.80    7.70
  -6   3   7   54.09    8.60
  -6   3   7   67.69    9.40
   6   3  -7   64.19    9.70
   6  -3   7   30.00   12.90
   6  -3  -8  313.47   21.50
  -6   3  -8  359.16   24.90
   6   3   8  266.57   27.80
  -6  -3   8  316.57   22.70
  -6   3  -8  339.27   24.20
   6  -3  -8  331.67   24.70
   6   3  -8  311.27   23.90
   6  -3   8  307.17   33.80
  -6  -3  -8  302.37   23.50
  -6  -3  -8  338.97   22.50
   6  -3   8  303.37   27.70
  -6   3   8  348.17   24.90
  -6   3   8  335.97   21.90
  -6   3   8  353.26   24.50
   6  -3   8  271.17   32.40
  -6  -3  -8  285.17   25.20
  -6   3  -9  430.06   28.80
  -6  -3   9  367.06   27.80
   6  -3  -9  416.66   27.20
  -6   3  -9  408.46   28.80
   6  -3  -9  401.96   26.60
  -6   3   9  431.06   26.80
   6   3  -9  389.46   29.60
  -6  -3  -9  448.56   31.70
  -6  -3  -9  379.56   28.50
   6  -3   9  423.46   33.80
   6  -3   9  354.16   38.20
  -6   3 -10   14.90    4.80
   6  -3 -10   19.90    3.80
  -6  -3 -10    6.40    6.60
   6  -3  10   12.00   10.40
  -6   3  10   22.30    4.40
  -6  -3  11   62.09    5.50
  -6  -3 -11   41.60    7.10
  -6   3  11   50.99    6.00
  -6  -4   0   33.70    4.20
  -6   4   0   47.80    5.60
   6  -4   0   32.10    4.30
   6  -4   0   44.30    5.80
  -6   4   0   45.10    5.10
   6  -4  -1 2174.28  139.69
   6   4   1 2422.56  139.59
   6  -4   1 2259.87  140.59
   6   4   2  245.78   17.10
  -6   4  -2  229.78   18.70
   6  -4  -2  251.57   17.10
   6   4   2  276.67   17.30
  -6  -4  -2  259.87   18.70
   6  -4   2  269.57   19.50
   6  -4   2  278.97   19.10
   6  -4   2  239.38   19.60
  -6   4   2  276.97   17.80
  -6   4   2  269.87   17.80
   6  -4  -3 3348.17  202.88
   6   4   3 3298.37  203.08
   6  -4  -4 1703.93  100.39
   6   4   4 1635.74  100.79
   6  -4   4 1643.74  103.99
   6  -4   4 1519.85  104.19
  -6   4  -5  884.91   53.39
   6   4   5  878.91   53.59
   6  -4  -5  791.82   50.39
  -6  -4   5  762.02   51.49
   6  -4  -5  864.71   50.89
  -6   4   5  793.22   52.79
  -6  -4  -5  828.42   55.09
   6  -4   5  801.72   56.39
  -6   4   5  794.62   50.19
  -6  -4  -5  782.92   51.99
   6  -4   5  698.93   55.99
   6  -4  -6   64.39    8.10
  -6  -4   6   70.79    6.40
   6   4   6   56.99    7.10
   6   4   6   47.60   10.10
   6  -4  -6   71.19    7.40
  -6   4  -6   66.49    9.40
  -6  -4  -6   70.19   10.60
   6  -4   6   50.89    7.80
  -6   4   6   70.09   10.10
  -6  -4  -6   65.79   12.30
   6  -4   6   48.40   12.70
  -6   4   6   82.09    9.10
   6  -4   6   51.99   14.40
  -6   4   6   60.39    6.90
   6   4  -6   85.39   10.00
  -6  -4  -6   63.39    9.00
   6  -4  -7  299.37   20.40
  -6  -4   7  303.77   20.50
   6  -4  -7  316.87   21.20
  -6   4  -7  338.37   23.90
   6   4   7  317.87   27.50
  -6  -4  -7  335.87   23.30
   6   4  -7  312.87   23.00
   6  -4   7  230.08   29.80
   6  -4   7  241.48   30.90
   6  -4   7  239.98   26.70
  -6  -4  -7  275.17   22.50
  -6   4   7  296.47   20.20
  -6  -4   8  122.99   11.40
   6  -4  -8  141.19   11.90
   6  -4  -8  144.99   13.10
  -6   4  -8  162.38   15.70
   6   4   8  123.49   17.50
  -6   4  -8  147.29   15.00
  -6  -4  -8  149.88   16.70
  -6   4   8  150.18   14.50
  -6  -4  -8  132.69   13.40
   6  -4   8  176.08   27.30
   6  -4   8  103.99   21.50
   6   4  -8  159.48   15.30
  -6  -4  -8  132.79   13.60
  -6   4   8  141.59   11.70
   6  -4   8  142.19   18.30
  -6   4  -9   92.69   10.90
  -6   4  -9   95.19   12.40
   6  -4  -9   89.79    9.50
  -6  -4  -9   81.09   12.00
   6  -4   9   92.99   15.60
   6   4  -9  105.89   13.20
  -6  -4  -9  105.29   16.50
  -6   4   9   93.29    9.20
   6  -4 -10  127.19    9.80
   6   4  10   98.99    7.90
  -6   4  10  130.59    9.60
  -6  -4 -10  117.09   12.80
   6  -4  10  106.69   17.50
  -6  -4  11  477.05   30.10
  -6   4  11  475.55   30.20
  -6  -4 -11  494.65   31.60
   6  -5   0    2.60    3.30
  -6   5   0    3.10    2.90
  -6   5   0    1.90    3.10
   6  -5   0    1.40    3.20
   6  -5   0    8.70    4.10
  -6  -5   0    2.40    2.40
  -6  -5   1 1179.78   72.99
   6  -5  -1 1211.88   74.39
  -6   5  -1 1274.97   74.39
   6  -5  -1 1099.99   72.89
   6  -5   1 1140.99   73.69
  -6  -5   2   47.40    4.00
   6  -5  -2   46.40    5.50
  -6  -5   2   56.79    4.30
   6  -5  -2   57.49    7.20
  -6  -5  -2   44.90    6.90
   6  -5   2   56.09    7.60
   6  -5   2   59.39    9.30
   6  -5   2   60.09    8.00
  -6   5   2   45.50    6.20
   6   5   3    4.70    3.30
   6  -5  -3    2.50    3.90
   6  -5  -3    0.40    2.90
   6  -5   3    8.30    5.50
  -6  -5  -3    2.10    4.70
  -6   5   3    0.10    3.50
   6  -5   3    9.10    5.20
  -6   5   3    5.10    3.70
   6   5   4    2.10    4.70
   6  -5  -4    1.70    3.90
  -6   5   4    6.80    2.50
   6  -5   4    8.70    6.30
  -6  -5  -4    1.10    6.10
  -6   5   4    1.50    4.10
  -6   5   4    2.00    4.20
   6  -5   4    5.10    6.40
  -6  -5  -4    1.40    5.40
  -6   5  -5 1101.69   68.59
   6  -5  -5  961.60   66.49
   6   5   5 1009.60   68.49
   6  -5  -5 1089.29   65.89
  -6   5  -5  951.50   71.49
   6  -5  -5 1182.48   67.79
  -6  -5  -5 1094.99   67.49
  -6   5   5 1006.10   67.59
   6  -5   5 1043.00   72.39
  -6   5   5 1126.09   67.99
  -6  -5  -5 1162.88   73.19
   6   5  -5 1072.09   67.89
   6  -5  -6   16.00    5.70
   6  -5  -6   14.00    4.20
  -6   5  -6   22.50    7.70
   6   5   6   11.50    2.60
  -6   5  -6   17.30    7.20
  -6  -5   6   15.20    3.00
   6   5   6   -2.70    7.10
   6  -5  -6   20.60    5.30
  -6  -5  -6   23.30    4.80
   6  -5   6   15.90   11.60
   6  -5   6    7.70    5.70
  -6  -5  -6   10.90    8.40
   6  -5   6    5.00    9.90
  -6   5   6   11.70    6.20
  -6  -5  -6    3.70    6.00
   6   5  -6   24.00    6.40
   6  -5   6    3.20    6.60
  -6   5   6   14.00    3.90
  -6   5   6   16.50    6.30
  -6  -5   7  355.06   23.10
   6  -5  -7  377.36   24.40
   6  -5  -7  326.57   23.50
   6   5   7  312.57   28.20
  -6   5  -7  391.86   26.20
   6   5  -7  357.76   26.30
  -6  -5  -7  335.37   25.90
  -6   5   7  352.16   23.10
  -6   5   7  349.07   25.80
   6  -5   7  314.37   35.50
   6  -5   7  301.37   26.10
  -6   5   7  388.16   26.40
  -6  -5  -7  343.77   24.30
   6  -5   7  295.07   34.30
  -6   5  -8  168.18   17.20
  -6   5  -8  174.68   14.50
   6  -5  -8  165.98   14.20
   6  -5  -8  147.69   13.00
   6   5   8  126.69   19.30
  -6   5   8  179.18   17.40
  -6   5   8  160.68   12.40
   6  -5   8  113.59   17.70
   6  -5   8  147.19   19.00
   6   5  -8  154.08   16.20
  -6  -5  -8  152.28   14.00
   6  -5   8  146.29   25.70
   6  -5   8  107.39   22.10
  -6   5  -9  147.29   14.30
  -6   5  -9  132.59   10.50
   6  -5  -9  122.99   10.90
   6  -5   9   96.79   14.10
  -6  -5  -9  104.49   12.80
   6   5  -9  120.79   13.50
  -6   5   9  114.49   10.30
   6  -5   9  117.29   16.70
   6  -5 -10   15.40    5.50
  -6   5  10    9.90    3.20
  -6  -5 -10    7.50    5.80
   6  -5  10   -0.40    7.90
  -6   5  11  290.97   18.90
  -6  -5 -11  310.27   20.20
   6  -6   0 2564.04  157.38
   6  -6  -1   51.39    6.30
  -6  -6   1   38.50    5.10
   6  -6  -1   40.60    6.80
  -6   6   1   54.09    6.50
   6  -6   1   43.40    7.20
  -6   6   1   35.80    5.30
  -6  -6  -1   32.60    5.80
   6  -6   1   36.60    6.50
   6  -6  -2 3381.86  206.78
  -6  -6   3  398.36   24.40
   6  -6  -3  416.66   27.70
   6   6   3  363.66   25.70
   6  -6  -3  393.06   24.90
   6  -6  -3  370.36   25.60
   6  -6  -3  395.56   25.10
  -6   6   3  396.56   26.10
   6  -6   3  375.06   28.20
  -6   6   3  384.46   24.50
   6  -6   3  387.16   29.60
  -6  -6  -3  365.96   28.10
  -6   6   3  380.06   26.10
   6  -6  -4 1702.43  102.69
   6   6   4 1581.34  101.89
   6   6   4 1525.55  102.49
   6   6  -4 1744.93  103.69
   6  -6   4 1829.22  108.49
   6  -6   4 1663.43  102.99
  -6  -6  -4 1623.44  105.59
   6  -6   4 1580.14  106.69
  -6   6   4 1684.03  103.39
   6   6   5   35.20    4.80
   6  -6  -5   29.90    5.00
   6  -6  -5   32.30    6.30
  -6   6  -5   26.50    7.50
  -6   6  -5   30.20    8.50
  -6  -6   5   37.30    4.40
   6   6   5   21.10    6.60
   6  -6  -5   38.00    7.30
  -6  -6  -5   34.40    7.30
   6   6  -5   40.00    6.90
  -6   6   5   26.80    6.80
   6  -6   5   37.00   10.80
   6  -6   5   31.90   10.90
  -6  -6  -5   28.30    9.00
   6   6  -5   33.30    4.70
  -6   6   5   28.70    4.20
  -6   6   5   30.90    6.80
   6  -6   5   30.00    6.80
   6  -6   5   34.10    6.00
   6  -6  -6 1358.56   86.29
   6  -6  -6 1523.75   87.19
   6  -6   6 1344.57   92.69
   6  -6   6 1550.64   96.79
  -6   6   6 1341.57   87.39
  -6  -6  -6 1377.06   91.59
   6  -6   6 1369.16   95.09
   6   6  -6 1213.48   85.59
  -6  -6  -6 1321.77   86.19
  -6   6   6 1468.45   87.59
  -6   6  -7  421.66   28.50
  -6  -6   7  428.66   26.40
   6  -6  -7  391.46   27.20
   6   6   7  407.56   30.40
   6  -6  -7  396.36   28.10
  -6  -6  -7  408.16   29.30
   6  -6   7  392.76   38.50
   6   6  -7  401.36   29.80
   6  -6   7  397.86   29.60
  -6   6   7  415.46   29.40
  -6   6   7  421.36   31.30
  -6  -6  -7  403.16   27.90
  -6   6   7  409.76   26.50
   6  -6   7  370.26   38.90
   6  -6   7  378.96   30.80
  -6   6  -8 1069.59   62.89
  -6  -6  -8 1008.70   60.69
  -6  -6  -8  847.82   60.69
   6   6  -8  861.51   61.79
   6  -6   8 1030.40   64.59
   6  -6   8  915.61   62.79
  -6   6  -9    7.80    5.60
   6  -6  -9    8.30    4.40
   6  -6   9    4.90    7.20
   6   6  -9    3.60    5.80
   6  -6   9    3.90    8.90
  -6   6   9    6.50    3.40
  -6  -6  -9    1.00    5.10
   6  -6 -10  580.94   36.90
   6  -6  10  574.24   39.10
  -6  -6 -10  635.84   37.80
   6  -6  10  552.44   39.30
   6   7   0    4.60    2.90
   6   7   0    3.90    3.00
   6  -7   0   -0.90    2.70
   6  -7   0    5.10    5.10
   6  -7   0    2.20    3.10
   6  -7  -1  548.85   33.70
   6  -7  -1  527.55   36.20
   6  -7  -1  471.95   33.60
   6  -7  -1  481.05   34.30
   6   7   1  518.65   33.70
   6   7   1  557.44   33.90
   6  -7   1  512.15   33.70
   6  -7   1  542.05   36.50
  -6  -7  -1  525.05   35.50
   6   7  -1  527.35   33.70
  -6   7   1  578.54   34.70
   6  -7   1  572.24   38.30
   6  -7   1  505.75   33.80
   6   7  -1  535.45   33.80
   6  -7  -2   86.99   11.00
   6   7   2  101.69    9.40
   6  -7  -2   92.09    8.80
   6  -7  -2   85.59    8.80
   6   7   2   73.49    7.40
   6  -7  -2   80.29    8.70
   6   7  -2   95.99    7.70
  -6   7   2   88.09    9.10
  -6  -7  -2   74.19   10.50
  -6   7   2   88.69    7.00
   6  -7   2   98.19   11.70
   6  -7   2   70.89    8.00
   6  -7   2   75.49    8.10
   6  -7  -3  169.48   11.80
   6  -7  -3  130.69   11.70
  -6   7  -3  165.18   14.60
   6  -7  -3  129.19   14.30
   6   7   3  135.99   11.60
  -6  -7   3  148.49   11.20
   6  -7  -3  164.28   12.20
   6   7   3  155.38   12.10
   6  -7  -3  158.98   12.70
   6   7  -3  135.99   11.60
   6  -7   3  145.29   13.60
   6   7  -3  152.68   13.50
  -6   7   3  154.08   10.90
  -6  -7  -3  182.88   15.70
  -6  -7  -3  160.98   15.40
   6  -7   3  160.18   16.20
   6  -7   3  156.08   15.70
  -6   7   3  152.98   13.00
   6  -7  -4   78.99    9.10
   6  -7  -4   57.99    7.40
   6  -7  -4   73.49    8.00
   6  -7  -4   69.99    7.90
   6   7   4   72.29    7.00
  -6   7  -4   75.69   12.20
   6   7  -4   63.89    6.70
   6  -7   4   55.19   10.30
  -6   7   4   60.29    8.10
   6  -7   4   59.89    8.50
  -6  -7  -4   64.79   11.40
   6   7  -4   76.09    9.70
   6  -7   4   68.59   12.20
  -6  -7  -4   56.49    9.40
   6  -7   4   62.99    8.90
  -6   7   4   74.79    6.90
   6   7  -4   55.29    7.30
   6   7   5    4.70    2.90
   6  -7  -5    1.30    5.60
  -6   7  -5   -3.60   13.10
   6   7   5   -1.40    3.40
  -6   7  -5   -0.50    6.20
  -6  -7   5    3.60    3.20
   6  -7  -5   -6.70    6.10
   6  -7   5    4.60    6.30
  -6  -7  -5   -2.30    5.60
   6  -7   5   13.40    8.60
   6  -7   5    6.80    6.00
  -6   7   5    2.20    3.40
   6  -7   5   -0.40    8.20
  -6  -7  -5    0.40    7.70
  -6   7   5    2.30    6.80
   6  -7  -6   20.70    5.60
  -6   7  -6   18.00    6.40
  -6   7  -6   22.90    8.90
   6  -7  -6   15.10    6.90
   6   7   6   10.60    5.00
   6  -7  -6   17.30    4.30
   6  -7  -6   25.30    7.30
  -6  -7   6   30.00    3.70
   6   7  -6   11.00    4.20
   6   7  -6   18.50    6.90
   6  -7   6   27.00    6.40
  -6  -7  -6   21.30    9.80
  -6  -7  -6   24.70    8.00
   6  -7   6   32.00   11.70
  -6   7   6   22.10    6.50
   6  -7   6   26.00   11.50
   6  -7   6   22.20    7.40
  -6   7   6   21.20    4.30
   6  -7  -7   58.49    7.80
   6   7   7   65.89    9.10
  -6   7  -7   61.99    9.40
  -6   7  -7   60.69   11.00
  -6  -7  -7   42.20    9.20
  -6   7   7   67.29    7.80
  -6   7   7   53.09    8.50
  -6  -7  -7   80.99    9.60
   6   7  -7   73.59   10.40
   6  -7   7   76.69   11.50
   6  -7   7   71.09   11.90
   6  -7   7   47.70   19.90
  -6   7  -8   11.50    3.00
  -6   7  -8    6.20    6.80
   6  -7  -8   14.40    5.50
  -6   7   8   12.20    3.60
   6  -7   8   12.00    7.00
   6  -7   8   10.60    8.70
   6   7  -8   10.70    6.70
  -6  -7  -8    9.70    5.40
  -6  -7  -8    2.00    6.50
  -6   7  -9  101.59   11.10
   6  -7  -9   91.79    9.70
  -6  -7  -9  101.99   10.10
   6  -7   9  103.39   13.30
   6  -7   9   80.49   12.70
   6   7  -9  106.59   14.00
   6  -7 -10   37.60    5.40
   6  -7  10   31.50    5.30
   6  -7  10   32.70    6.80
  -6  -7 -10   30.90    4.70
   6  -8   0  609.54   41.60
   6  -8   0  661.03   41.80
   6   8   0  671.33   41.70
  -6  -8   0  678.53   43.50
   6  -8   0  641.64   44.20
   6   8   0  670.23   41.80
   6  -8  -1  647.74   41.00
   6   8   1  655.13   41.00
  -6  -8   1  677.03   42.30
   6   8   1  622.44   41.00
   6  -8  -1  639.74   40.90
   6  -8  -1  667.13   44.20
   6   8  -1  668.83   41.00
  -6  -8  -1  638.74   43.20
   6  -8   1  597.24   43.50
   6  -8   1  650.73   41.00
   6  -8   1  604.44   40.90
   6  -8   1  656.33   44.20
   6   8  -1  626.24   41.00
   6  -8  -2  426.26   27.90
   6  -8  -2  420.16   28.20
   6   8   2  463.45   28.50
   6  -8  -2  391.06   30.80
  -6  -8   2  459.75   28.80
   6   8   2  450.85   28.00
   6   8  -2  411.56   28.00
  -6  -8  -2  392.56   28.20
   6   8  -2  441.86   27.80
   6  -8   2  407.66   28.00
  -6   8   2  482.05   29.10
   6  -8   2  437.56   31.30
   6  -8   2  410.56   28.20
   6  -8   2  421.86   31.60
  -6  -8  -2  416.06   30.80
   6   8  -2  374.96   28.70
   6  -8  -3   56.09    8.10
   6  -8  -3   65.89   10.90
   6  -8  -3   65.69    9.70
  -6  -8   3   63.29    7.30
  -6   8  -3   66.89   10.90
   6   8   3   61.39    7.40
   6  -8  -3   62.19    8.70
   6  -8  -3   64.09    8.10
   6   8  -3   66.89    7.10
   6  -8   3   77.09    8.70
   6  -8   3   62.49    8.10
   6  -8   3   79.79   12.10
   6   8  -3   64.49    9.30
  -6  -8  -3   58.59   10.50
  -6  -8  -3   52.09    8.60
   6  -8   3   65.59   10.50
   6   8  -3   56.19    7.60
  -6   8   3   68.89    6.40
  -6   8   3   74.79    9.50
   6  -8  -4   92.69   11.50
  -6   8  -4  107.69   13.60
   6  -8  -4  100.49    9.70
   6  -8  -4   95.49   10.30
   6  -8  -4   94.59   12.30
   6   8   4   81.69    8.90
   6  -8   4   93.89   13.90
  -6   8   4  105.59    8.80
  -6  -8  -4   98.49   13.80
   6  -8   4  102.39   14.90
   6   8  -4   89.49    9.50
  -6  -8  -4   96.69   11.20
  -6   8   4  109.09   11.60
   6  -8   4  107.99   15.60
   6   8  -4   89.09    8.50
  -6   8  -5  491.05   33.60
   6  -8  -5  398.86   28.40
   6  -8  -5  466.25   32.90
   6  -8  -5  430.66   29.90
   6  -8  -5  413.46   31.10
   6   8   5  405.46   28.80
   6  -8  -5  485.45   29.70
  -6   8  -5  453.05   30.80
   6  -8   5  490.95   37.30
   6  -8   5  484.65   31.20
   6  -8   5  443.26   30.50
  -6  -8  -5  406.86   34.40
  -6   8   5  474.95   31.10
   6   8  -5  440.16   29.60
   6   8  -5  422.76   31.80
   6  -8   5  531.35   37.70
  -6  -8  -5  457.75   31.00
  -6   8  -6   50.19   10.50
   6  -8  -6   44.80    7.20
  -6   8  -6   53.09    7.10
   6  -8  -6   50.69    7.10
   6  -8  -6   45.10    8.90
  -6   8   6   57.19    6.70
  -6  -8  -6   40.80    8.40
   6  -8   6   66.29   14.20
   6   8  -6   34.90    8.10
   6  -8   6   69.69   10.70
   6  -8   6   65.09   10.30
   6  -8   6   54.69   13.60
  -6   8  -7 1018.90   60.89
  -6   8  -7 1056.19   64.39
   6  -8  -7  843.12   67.89
  -6  -8  -7 1035.70   62.29
   6   8  -7  873.81   63.49
  -6  -8  -7  970.00   62.79
   6  -8   7 1084.19   63.99
   6  -8   7  960.70   63.19
   6  -8  -8   33.40    5.90
  -6   8  -8   21.60    6.40
  -6   8   8   39.50    5.40
   6   8  -8   32.40    7.00
  -6  -8  -8   23.30    6.60
   6  -8   8   37.40    7.20
   6  -8   8   39.60    8.10
   6  -8  -9  480.95   30.00
  -6   8  -9  468.65   30.60
   6   8  -9  411.76   30.90
  -6  -8  -9  470.75   30.10
   6  -8   9  475.55   31.20
   6  -8   9  489.85   31.50
   6   9   0   -3.00    5.90
   6  -9   0    4.60    5.10
   6  -9   0    8.30    7.30
   6  -9   0   12.20    5.40
   6  -9   0    8.10    7.40
   6   9   0   13.70    4.80
  -6  -9   0   -3.60    5.10
  -6  -9   1   11.10    5.60
   6  -9  -1   15.80    7.40
   6  -9  -1    6.90    6.90
   6   9  -1   13.70    6.50
   6   9  -1   16.50    6.50
   6  -9   1   14.80    5.50
  -6  -9  -1   16.00    4.50
   6  -9   1   12.30    6.90
   6  -9   1   14.10    7.40
  -6  -9  -1   11.80    6.80
   6  -9   1   18.00    6.90
   6   9  -1    4.50    4.50
  -6  -9   2  214.18   16.20
   6  -9  -2  183.68   18.90
   6  -9  -2  208.88   16.00
   6  -9  -2  228.38   27.40
   6   9   2  196.88   15.00
   6  -9  -2  215.38   15.40
   6   9  -2  202.58   19.00
   6  -9   2  188.58   16.00
   6  -9   2  206.08   15.70
   6   9  -2  206.78   15.50
   6  -9   2  184.38   18.90
  -6  -9  -2  195.58   15.80
  -6   9   2  180.48   13.60
  -6  -9  -2  170.98   18.20
   6   9  -2  202.88   15.10
   6  -9   2  224.38   20.20
   6   9   3  140.29   11.60
  -6   9  -3  152.98   14.90
   6  -9  -3  140.59   13.00
  -6  -9   3  133.49   12.00
   6  -9  -3  148.29   12.50
   6  -9  -3  124.09   16.10
  -6   9   3  150.48   13.00
   6  -9   3  130.39   16.50
   6  -9   3  138.19   17.10
   6   9  -3  124.79   11.20
  -6  -9  -3  117.39   15.80
   6  -9   3  150.08   12.80
  -6  -9  -3  138.59   12.90
   6   9  -3  138.69   11.90
   6   9  -3  121.59   13.40
   6  -9   3  141.49   12.30
  -6  -9   4   68.79    8.80
   6  -9  -4   88.29   10.10
  -6   9  -4   85.39   13.60
   6   9   4   91.69    8.80
   6  -9  -4  100.09   10.80
   6  -9  -4   70.89   11.50
   6  -9  -4   90.99    9.90
   6  -9   4  113.79   10.90
  -6   9   4   84.29   10.90
   6  -9   4  115.09   16.20
   6  -9   4  102.79   10.40
  -6  -9  -4   75.59   13.10
   6   9  -4   85.69   12.20
   6   9  -4   88.79    9.90
   6  -9   4   78.49   12.80
  -6  -9  -4   93.29   11.60
  -6   9  -5   21.60    5.60
   6  -9  -5   18.20    5.60
   6  -9  -5   17.80    5.40
   6  -9  -5    9.50    4.70
   6   9   5   15.10    3.50
  -6   9  -5   17.40    8.20
  -6  -9  -5    8.90   10.60
  -6   9   5   20.20    8.70
   6   9  -5   17.40    6.50
  -6  -9  -5   16.30    6.90
   6  -9   5   20.50    9.80
   6  -9   5   21.50    6.10
   6  -9   5   17.80    8.60
   6  -9   5   19.70    5.20
   6   9  -5   22.00    5.10
   6  -9  -6  105.49   10.10
  -6   9  -6  125.79   10.20
   6  -9  -6  136.79   11.90
  -6   9  -6  107.69   14.80
   6  -9   6  144.39   12.90
   6   9  -6  112.99   13.80
   6  -9   6  140.79   12.90
   6   9  -6  109.89   10.20
  -6  -9  -6  112.99   13.30
   6  -9  -7   16.30    5.20
  -6   9  -7    4.60    5.70
   6  -9   7   19.50    5.30
   6   9  -7   11.00    6.00
   6  -9   7   17.40    5.90
  -6  -9  -7    4.80    5.90
   6  -9  -8    1.30    4.10
  -6   9  -8   -0.90    4.00
   6  -9   8   10.00    4.50
   6   9  -8    3.50    4.60
  -6  -9  -8   -2.80    4.30
   6  -9   8    6.00    4.90
  -6   9  -9   35.40    5.10
   6  -9  -9   41.10    5.50
   6   9  -9   40.90    5.80
  -6  -9  -9   48.50    5.40
   6  -9   9   44.10    5.90
   6  -9   9   40.40    6.00
   6  10   0   42.20    6.50
  -6 -10   0   43.20    8.70
   6 -10   0   48.50    7.40
   6 -10   0   39.70    9.80
   6  10   0   28.70    5.90
   6 -10   0   26.80    9.20
   6 -10   0   41.20    6.60
   6 -10  -1 1390.46   87.49
   6 -10  -1 1271.57   87.79
  -6 -10  -1 1354.16   84.09
  -6 -10  -1 1378.16   86.99
   6 -10   1 1403.76   88.49
   6 -10   1 1282.27   87.29
   6 -10  -2  165.28   18.20
   6  10   2  162.08   13.40
  -6 -10   2  167.58   14.70
  -6  10  -2  179.78   15.70
   6 -10  -2  120.89   17.40
   6 -10  -2  171.48   14.40
   6 -10  -2  161.78   14.20
  -6 -10  -2  167.88   14.20
   6 -10   2  162.88   14.00
   6  10  -2  140.39   14.40
   6 -10   2  140.49   16.80
   6 -10   2  149.19   18.20
  -6 -10  -2  149.29   16.90
   6 -10   2  184.88   14.30
   6  10  -2  164.48   13.90
  -6 -10   3  282.07   22.60
   6 -10  -3  353.16   22.50
   6 -10  -3  316.87   26.60
  -6  10  -3  339.17   24.50
   6  10   3  324.97   21.80
   6 -10  -3  291.17   22.00
   6 -10  -3  349.17   22.90
   6  10  -3  325.67   22.30
  -6 -10  -3  289.07   26.00
   6 -10   3  284.67   30.60
   6 -10   3  328.67   22.80
  -6 -10  -3  323.57   23.00
   6 -10   3  295.57   27.10
   6 -10   3  334.47   22.60
   6  10  -3  285.27   23.50
   6  10   4   47.20    6.50
   6 -10  -4   41.20    6.80
  -6  10  -4   37.70    8.50
   6 -10  -4   41.70    5.80
   6 -10  -4   40.30    6.40
  -6 -10   4   35.50    6.70
   6 -10  -4   47.90   10.60
  -6 -10  -4   58.29    8.20
   6  10  -4   38.90    7.60
   6  10  -4   36.50    6.00
  -6 -10  -4   35.90    9.60
   6 -10   4   36.60   10.00
  -6  10  -5  632.44   39.10
   6 -10  -5  634.04   40.10
  -6  10  -5  630.64   42.00
   6 -10  -5  629.64   39.80
  -6 -10  -5  613.04   40.60
   6  10  -5  569.94   39.60
   6 -10   5  620.44   40.60
   6 -10   5  640.34   40.50
   6 -10  -6   75.89    9.20
  -6  10  -6   65.59   11.30
   6 -10  -6   54.49    9.10
  -6 -10  -6   77.59    9.90
   6  10  -6   63.49   10.80
   6 -10   6   91.49    9.60
  -6  10  -7  476.55   32.10
   6 -10  -7  486.65   31.10
   6 -10   7  519.75   31.80
   6 -10   7  503.35   31.60
  -6 -10  -7  407.66   33.10
  -6 -10  -7  477.95   30.50
   6 -10  -8  137.19    9.80
  -6  10  -8  123.19   10.10
   6  10  -8  129.39   12.30
   6 -10   8  132.49   10.90
  -6 -10  -8  113.49    8.90
   6 -11   0   -1.00    7.40
   6  11   0   -4.60    5.30
  -6 -11   0   10.60    9.90
   6 -11   0    6.30    5.10
  -6 -11   0   10.50    4.60
   6 -11   0    0.60    7.40
   6 -11   0    3.60    5.90
   6  11   0    1.70    4.20
  -6 -11   1  162.78   16.30
   6 -11  -1  183.08   15.20
   6 -11  -1  140.89   18.30
   6 -11  -1  186.08   15.10
   6 -11  -1  167.08   19.10
   6  11   1  176.48   14.60
   6 -11   1  196.18   15.10
   6 -11   1  164.68   19.10
   6 -11   1  192.38   14.90
   6  11  -1  179.78   14.70
  -6 -11  -1  174.18   14.50
   6 -11   1  140.89   21.70
  -6 -11  -1  156.48   17.60
   6 -11  -2  358.56   24.10
  -6 -11   2  321.57   25.40
  -6  11  -2  352.16   25.20
   6 -11  -2  362.56   23.90
   6  11   2  336.07   23.30
   6 -11   2  349.17   24.10
  -6 -11  -2  319.37   23.90
  -6 -11  -2  297.17   26.60
   6  11  -2  354.76   23.70
   6 -11   2  332.97   29.20
   6 -11   2  337.27   23.90
  -6  11  -3  243.88   19.30
   6  11   3  242.78   17.30
   6 -11  -3  244.88   18.40
   6 -11  -3  232.18   17.70
  -6 -11  -3  237.28   18.30
   6 -11   3  240.78   18.20
   6 -11   3  248.98   18.30
   6  11  -3  226.18   17.60
   6 -11  -4  131.29   12.10
   6 -11  -4  133.39   12.30
   6 -11  -4  110.29   10.40
   6  11   4  119.29   10.40
  -6  11  -4  137.09   10.30
  -6  11  -4  143.09   13.90
   6  11  -4  122.29   12.90
   6 -11   4  148.59   12.30
   6  11  -4  127.39   11.40
   6 -11   4  136.19   12.10
  -6 -11  -4  106.99   12.10
   6 -11  -5   51.59    7.70
   6 -11  -5   56.59    8.10
  -6  11  -5   54.19    8.00
   6 -11   5   65.29    8.50
   6  11  -5   57.69    7.20
  -6 -11  -5   54.39    7.50
   6 -11   5   68.39    8.80
  -6  11  -6   11.90    5.20
   6 -11  -6   12.80    4.20
  -6 -11  -6   10.70    3.70
   6  11  -6   12.20    4.40
   6 -11   6   19.20    4.30
  -6  11  -7   52.29    6.60
   6  11  -7   48.60    6.70
  -6 -11  -7   50.79    6.10
   6 -12   0  325.57   22.60
  -6 -12   0  317.67   22.40
   6 -12   0  323.27   22.90
   6  12   0  331.27   22.60
  -6  12   0  324.17   23.40
  -6  12  -1   10.50    6.10
   6 -12  -1    7.70    5.30
   6  12   1    2.20    4.00
   6 -12  -1   -0.70    4.50
   6  12   1    1.10    4.50
   6 -12   1    9.10    4.60
   6  12  -1   -2.80    4.80
   6  12  -1    1.10    3.80
  -6 -12  -1   13.90    5.00
   6 -12   1    6.00    5.00
  -6  12  -2  625.34   40.30
   6 -12  -2  605.24   39.40
   6  12   2  594.74   39.00
   6 -12  -2  623.14   39.10
   6  12  -2  615.44   39.20
   6 -12   2  614.04   39.60
   6 -12   2  602.94   39.50
  -6 -12  -2  604.54   39.50
  -6  12  -3   45.30    5.60
   6 -12  -3   44.20    7.10
  -6  12  -3   44.40    7.30
   6 -12  -3   52.89    8.30
   6  12   3   34.40    7.00
   6 -12   3   61.89    8.50
   6 -12   3   51.69    8.00
   6  12  -3   53.79    7.50
  -6 -12  -3   54.39    7.10
   6  12  -3   45.50    8.10
  -6  12  -4  322.97   22.40
   6 -12  -4  316.67   22.40
   6  12  -4  318.07   21.10
  -6 -12  -4  299.57   21.80
   6 -12   4  312.27   21.40
   6 -12  -5  165.48   12.80
  -6  12  -5  179.28   14.00
   6 -12  -5  188.58   13.00
   6 -12   5  184.48   13.20
   6 -12   5  176.78   13.00
  -6 -12  -5  159.78   12.60
  -6 -12  -5  174.68   13.20
   6 -12  -6  654.73   41.20
  -6 -12  -6  662.23   41.20
   6 -12   6  661.53   41.30
   6 -13   0    5.40    5.30
  -6  13   0    2.20    4.20
   6 -13   0    2.20    3.70
  -6 -13   0    2.90    3.60
  -6 -13   0    1.80    3.10
  -6 -13   1    3.70    3.00
   6  13   1    1.10    3.60
  -6 -13   1    3.40    3.30
   6 -13  -1    6.30    5.70
  -6  13  -1    0.30    6.00
   6 -13  -1    0.90    4.60
  -6 -13  -1    2.50    3.20
   6 -13   1    8.10    6.40
   6 -13   1    1.80    5.20
  -6  13   1    7.90    6.30
  -6 -13  -1    4.50    3.90
   6  13  -1   10.50    5.60
   6  13  -1    7.50    4.00
  -6 -13   2   18.00    3.50
   6 -13  -2   10.60    3.50
  -6  13  -2   12.70    4.60
   6  13   2   21.00    3.80
   6 -13  -2   17.40    4.60
  -6 -13  -2   17.40    3.80
  -6  13   2   20.50    5.00
   6 -13   2   19.70    4.10
   6 -13   2   19.10    4.40
  -6 -13  -2   19.10    4.50
   6  13  -2   15.80    4.00
   6  13  -2   14.80    3.80
   6  13   3   15.70    3.00
   6 -13  -3   15.40    4.00
  -6  13  -3   15.30    4.20
  -6 -13  -3   19.50    4.40
  -6 -13  -3   15.50    3.60
   6  13  -3   16.80    2.90
   6 -13   3   16.50    4.00
   6 -13   3   18.20    3.80
   6  13  -3   15.40    3.30
   6 -13  -4   36.30    5.70
  -6  13  -4   38.40    6.30
  -6 -13  -4   36.80    5.20
   6 -13   4   42.10    5.40
  -6 -13  -4   34.80    4.70
   6  13  -4   31.90    4.80
   6  14   0   38.30    4.40
  -6 -14   0   29.10    4.50
   6 -14   0   28.10    4.10
  -6 -14   0   32.30    4.40
   6 -14   0   30.30    4.80
  -6  14   0   22.40    4.00
  -6 -14   1   89.69    7.40
  -6  14  -1  108.99    8.90
   6 -14  -1   94.89    8.00
   6 -14   1   94.19    7.90
   6 -14   1  100.99    8.10
  -6 -14  -1   91.49    7.70
  -6 -14  -1   97.69    8.60
  -6  14   1  108.79    8.80
  -7   0   0   -3.70    1.90
   7   0   0    0.10    1.70
  -7   0   0   -0.60    1.90
   7   0   0   -2.80    2.00
   7   0   1   -1.80    1.90
   7   0   1    0.50    2.20
   7   0   1    1.80    2.10
   7   0  -1    7.10    2.00
  -7   0   1    3.20    1.70
  -7   0  -1    4.20    3.30
   7   0   2  400.26   26.30
   7   0   2  399.06   26.50
  -7   0   2  360.56   24.60
  -7   0   2  369.16   24.80
   7   0   2  356.56   25.30
  -7   0  -2  405.36   27.30
   7   0  -2  435.36   24.40
   7   0   3    1.80    3.30
   7   0  -3    3.60    1.70
  -7   0   3   -0.20    1.70
  -7   0  -3   -4.10    3.80
  -7   0   3    2.10    1.90
   7   0   3   -4.70    3.60
   7   0   3    0.70    3.50
  -7   0  -4  171.98   16.30
  -7   0   4  175.78   13.10
  -7   0   4  194.28   13.00
   7   0   4  165.78   14.00
   7   0   4  170.08   15.90
   7   0  -4  192.78   12.00
   7   0   4  196.18   16.00
   7   0   5   -3.10    4.90
  -7   0   5    2.30    2.80
   7   0   5   -1.90    6.10
   7   0  -5    3.10    2.10
   7   0  -5    2.40    2.30
  -7   0  -5    2.00    5.20
   7   0   5   -3.10    5.30
   7   0   6  264.07   23.50
  -7   0  -6  298.57   19.80
  -7   0   6  255.87   19.70
  -7   0   6  289.47   19.60
   7   0   6  281.67   24.60
   7   0   6  269.57   20.00
   7   0   6  255.77   20.50
   7   0   7   -8.10    5.00
   7   0   7   -2.60    6.20
   7   0  -7    2.60    5.30
   7   0  -7    1.30    2.60
  -7   0   7   -0.60    4.10
   7   0   7   -3.90    7.50
  -7   0  -7   -8.50    5.10
   7   0   7  -15.50    7.60
  -7   0  -7    6.60    3.60
   7   0   8 2309.77  156.18
   7   0   8 2552.74  157.28
   7   0   9  -14.70    8.40
   7   0   9    4.00    8.40
  -7   0   9    4.00    4.90
  -7   0  -9   -7.60    6.70
  -7   0   9    3.80    3.40
   7   0   9   -0.70   11.00
  -7   0  10    7.20    3.40
  -7   0 -10   -9.10    6.50
  -7   0 -11   -5.80    4.40
  -7   0  11    0.70    2.50
   7   1   0 2250.87  138.69
   7  -1   0 2292.37  138.99
   7   1   1 1818.82  116.99
   7  -1  -1 2004.80  116.79
   7  -1   1 1851.41  117.39
   7   1  -1 1960.30  116.59
   7   1   2 3103.39  189.78
   7   1  -2 3441.06  189.08
   7  -1   2 2767.82  190.18
   7   1   3  824.62   49.30
   7   1   3  788.02   48.00
  -7  -1   3  760.92   47.20
   7  -1  -3  806.42   46.80
  -7   1  -3  746.23   50.29
  -7   1   3  773.72   47.70
  -7  -1  -3  703.73   49.70
   7  -1   3  793.22   49.60
   7   1  -3  674.53   46.50
   7  -1   3  709.53   49.60
  -7  -1   4  921.81   57.19
   7  -1  -4  921.61   56.39
   7   1   4  908.21   57.99
   7   1   4  956.00   59.69
   7  -1   4  958.30   60.19
   7  -1   4  885.21   60.09
  -7  -1  -4  936.01   60.59
   7   1  -4  939.61   55.99
   7   1  -4  845.72   56.09
  -7   1   4  900.81   57.59
   7   1   5  511.25   36.40
   7   1   5  491.35   36.10
   7   1   5  480.75   34.20
   7  -1   5  494.25   35.40
   7   1  -5  547.75   31.60
   7   1  -5  504.55   31.70
  -7  -1  -5  535.95   37.40
   7  -1   5  466.85   36.50
  -7   1   5  548.75   33.60
   7  -1   5  522.25   37.20
  -7   1   5  519.65   33.80
   7   1   6  832.12   53.09
   7  -1  -6  818.82   47.30
   7   1   6  710.23   48.50
   7   1   6  771.02   49.10
   7   1   6  741.33   49.99
  -7   1  -6  801.32   48.80
  -7   1  -6  818.22   49.99
   7   1   6  750.62   52.29
  -7   1   6  795.92   49.50
  -7  -1  -6  777.32   48.80
   7   1  -6  696.03   46.40
   7  -1   6  663.43   52.69
   7  -1   6  701.63   54.49
   7  -1   6  704.93   48.80
   7  -1   6  702.03   49.10
  -7  -1  -6  817.42   49.90
  -7   1   6  773.42   48.80
   7   1   7 1208.68   81.39
   7   1   7 1282.27   77.29
   7  -1  -7 1330.97   74.99
   7   1   7 1079.79   80.39
   7   1  -7 1211.68   76.49
  -7  -1  -7 1267.37   76.79
  -7  -1  -7 1310.27   76.19
   7  -1   7 1118.59   82.19
  -7   1   7 1253.07   76.89
   7  -1   7 1149.08   77.59
   7  -1   7 1114.09   76.89
  -7   1   7 1226.68   75.19
   7  -1   7 1169.48   82.09
   7   1   8  605.64   40.70
  -7  -1   8  558.24   39.20
   7   1   8  532.35   45.10
  -7   1  -8  652.73   41.00
   7   1   8  541.65   39.40
  -7   1   8  635.14   38.00
   7  -1   8  549.25   40.20
  -7   1   8  637.64   40.10
   7  -1   8  592.84   41.50
   7  -1   8  530.65   46.80
  -7  -1  -8  645.84   40.30
  -7   1  -9  534.05   34.20
   7   1   9  428.86   39.10
  -7  -1   9  446.36   32.30
  -7  -1   9  502.65   30.80
  -7   1   9  508.15   33.10
   7  -1   9  464.35   35.30
   7  -1   9  389.26   39.10
  -7  -1  -9  465.45   35.00
   7  -1   9  406.26   42.10
  -7   1   9  494.75   30.80
  -7  -1  -9  482.75   33.40
   7   1  10   53.39    7.60
  -7   1 -10   54.09    8.30
   7  -1  10   48.20    8.60
  -7  -1 -10   68.49    9.00
   7   1  11   87.49    8.20
  -7   1 -11   85.99    8.80
  -7  -1  11   92.79    7.30
  -7   1  11   93.59    7.60
  -7  -1 -11   65.79   10.50
   7  -2   0    1.00    3.00
   7  -2   0    3.50    2.30
   7   2   0    1.10    1.60
   7  -2   0    0.80    2.30
  -7   2   0    1.80    2.60
  -7   2   0    4.00    2.40
   7   2   1  754.32   46.80
  -7   2  -1  717.33   48.20
   7  -2  -1  748.23   47.90
   7  -2  -1  781.62   46.70
   7   2  -1  787.32   46.30
   7  -2   1  747.73   48.60
   7  -2   1  729.83   47.50
   7   2   2  191.98   13.40
   7   2   2  178.68   13.60
  -7   2  -2  182.88   15.50
   7  -2  -2  208.08   12.80
   7   2   2  202.88   14.00
   7   2  -2  201.58   12.00
  -7  -2  -2  209.18   15.10
  -7   2   2  181.48   13.20
   7  -2   2  175.18   14.50
  -7   2   2  185.88   13.30
   7  -2   2  179.48   15.10
   7  -2  -3 1224.58   69.29
   7   2   3 1131.49   71.09
  -7   2  -3 1056.29   72.29
  -7  -2   3 1049.30   69.19
   7   2   3 1208.38   70.09
   7  -2   3 1063.99   72.09
   7   2   4  107.69   10.70
  -7   2  -4  110.19   11.60
  -7  -2   4   84.09    9.70
   7   2   4   95.09    9.30
   7  -2  -4  116.89    8.20
  -7  -2   4  123.49    7.90
   7   2   4  114.99   11.70
  -7  -2  -4  100.29   12.20
   7  -2   4   92.39   12.00
  -7   2   4   92.49    9.20
   7  -2   4   76.89   11.60
  -7   2   4  117.49    9.20
   7  -2  -5    6.40    3.10
   7   2   5    0.70    5.00
   7   2   5   13.30    4.80
  -7  -2   5    3.00    2.50
   7   2   5   -5.60    7.90
   7  -2   5   -2.00    6.20
  -7  -2  -5   -4.20    5.50
  -7   2   5    2.20    3.80
   7  -2   5   -8.40    6.00
   7   2   6   48.30    7.10
  -7   2  -6   46.50    8.30
   7   2   6   37.10    8.80
   7  -2  -6   43.30    5.30
   7   2   6   44.40    7.40
  -7  -2   6   48.00    6.00
   7   2   6   56.29    8.90
   7   2   6   28.50    9.70
  -7  -2  -6   44.80    6.70
  -7  -2  -6   41.50    7.70
   7   2  -6   42.70    7.30
   7  -2   6   16.70    9.80
   7  -2   6   27.60    7.40
  -7   2   6   43.00    8.60
   7  -2   6   41.50   11.30
  -7   2   6   41.40    6.60
  -7   2  -7    2.80    7.30
   7   2   7    5.10    7.20
   7   2   7   11.50    8.40
   7   2   7   -9.00    8.40
   7   2   7    4.30    5.10
  -7  -2   7    5.10    4.00
   7  -2  -7    9.60    4.20
  -7   2  -7   11.70    4.70
   7  -2  -7    6.40    3.40
   7  -2   7    4.10    5.90
  -7  -2  -7   10.20    5.00
   7  -2   7   -5.40    6.70
  -7  -2  -7    3.90    5.90
  -7   2   7   13.20    5.30
   7  -2   7   -3.90    9.70
   7  -2   7   -2.70    9.20
  -7   2   7   11.00    5.50
   7   2   8  139.29   21.20
  -7  -2   8  168.78   14.60
   7  -2  -8  184.88   13.10
  -7   2  -8  171.18   17.70
  -7   2  -8  194.58   15.00
   7  -2   8  140.79   23.70
  -7  -2  -8  177.88   16.20
  -7   2   8  207.68   16.20
   7   2  -8  191.78   16.40
  -7  -2  -8  180.78   13.60
   7  -2   8  180.78   25.20
  -7   2   8  216.28   17.00
   7  -2   8  139.79   19.00
  -7   2   8  179.98   13.40
  -7   2  -9   -6.20    6.80
  -7  -2   9    4.60    4.30
   7  -2  -9    6.80    4.10
   7  -2  -9    3.90    3.30
  -7  -2  -9   -5.00    6.60
   7  -2   9  -10.60    9.00
   7  -2   9    3.90   12.70
  -7   2   9   17.00    5.80
  -7   2   9    2.90    3.60
  -7  -2  -9    8.40    9.90
   7   2  10  178.48   15.60
  -7   2 -10  223.58   17.00
  -7  -2  10  232.98   14.90
  -7   2  10  216.98   14.90
   7  -2  10  225.18   22.30
  -7  -2 -10  184.38   18.10
  -7   2  11    6.30    2.70
  -7  -2 -11    2.00    5.60
   7   3   0 1658.73   96.69
   7  -3   0 1502.25   97.19
  -7  -3   1   11.40    2.00
   7  -3  -1    6.90    2.50
  -7   3  -1    8.80    3.70
   7  -3  -1    7.00    3.30
   7  -3  -1    8.40    3.10
  -7  -3  -1    7.40    3.10
   7  -3   1    6.90    3.90
   7  -3   1    8.30    3.60
   7   3  -1    6.30    1.40
  -7   3   1   10.20    2.90
   7   3   2  347.57   22.40
  -7  -3   2  362.66   21.50
   7  -3  -2  333.57   23.30
   7   3   2  326.27   22.50
  -7   3  -2  305.77   24.30
   7  -3  -2  370.36   23.00
   7  -3  -2  347.67   22.00
   7  -3   2  344.37   24.10
   7  -3   2  323.87   24.40
  -7   3   2  338.07   22.60
   7  -3   2  390.56   25.60
  -7   3   2  347.17   22.60
  -7  -3  -2  322.97   23.60
   7   3   3  121.09    9.40
   7   3   3  103.19   10.00
  -7  -3   3  120.19    7.20
  -7   3  -3   94.79   10.80
   7  -3  -3  124.39    9.40
   7  -3  -3  113.39    8.30
   7   3   3  100.99    9.30
   7  -3   3   97.69   11.50
  -7  -3  -3   99.69   11.00
  -7   3   3  102.29    9.10
  -7   3   3  104.79    9.30
   7  -3   3  109.19   11.50
   7   3   4  672.53   47.80
   7  -3  -4  802.42   46.30
   7  -3  -4  729.93   45.90
  -7  -3   4  735.93   46.90
   7   3   4  697.93   46.70
   7   3   4  722.33   48.00
   7  -3   4  716.93   49.99
  -7  -3  -4  735.63   49.50
   7  -3   4  756.82   49.80
  -7   3   4  759.72   47.10
   7  -3  -5   28.90    4.10
   7   3   5   34.80    6.40
   7  -3  -5   18.00    4.00
  -7   3  -5   38.30    6.90
   7   3   5   15.70    5.60
  -7  -3   5   25.40    3.30
   7   3   5   16.90    7.10
   7  -3   5   10.40    5.20
  -7  -3  -5   26.10    6.40
   7  -3   5   23.30   13.90
  -7  -3  -5   22.10    8.60
   7  -3   5   13.70    4.80
   7  -3   5    4.40    7.30
  -7   3   5   33.50    9.00
  -7   3   5   15.10    5.10
   7  -3  -6  615.34   39.30
  -7   3  -6  671.53   42.50
   7   3   6  663.03   44.50
   7   3   6  580.54   39.80
  -7  -3   6  657.43   39.80
   7  -3  -6  651.83   39.80
   7   3   6  663.93   42.10
  -7   3   6  666.83   41.70
  -7   3   6  599.54   39.30
   7  -3   6  585.14   41.10
   7  -3   6  565.14   46.60
  -7   3   6  620.84   41.20
   7   3  -6  636.24   41.00
  -7  -3  -6  570.84   41.30
   7  -3  -7   46.30    6.40
   7  -3  -7   37.40    5.00
  -7  -3   7   44.00    5.80
  -7   3  -7   36.40    9.00
  -7   3   7   44.40    7.40
   7  -3   7   20.00   11.80
   7  -3   7   34.70    8.50
  -7   3   7   32.50    7.10
   7  -3   7   22.90   11.70
  -7  -3  -7   39.50    6.60
  -7  -3  -7   21.60   11.70
   7  -3  -8  456.25   29.10
   7   3   8  364.56   34.60
   7  -3  -8  459.45   28.50
  -7  -3   8  442.76   29.60
  -7   3  -8  428.66   32.00
   7   3  -8  445.66   30.80
  -7  -3  -8  429.16   30.40
   7  -3   8  385.06   33.90
  -7  -3  -8  459.95   32.50
  -7   3   8  451.85   28.70
  -7   3   8  460.35   32.00
  -7  -3  -8  443.56   29.70
   7  -3  -9   36.40    4.80
   7  -3  -9   28.10    5.80
  -7   3  -9   34.50    6.30
  -7   3  -9   23.00    7.50
  -7   3   9   31.80    5.00
  -7  -3  -9   29.70    7.40
   7  -3   9   26.00   11.10
  -7  -3  -9   49.20   11.70
   7  -3 -10  630.94   38.80
  -7   3 -10  624.44   40.20
  -7  -3 -10  641.64   41.60
   7  -3  10  603.44   44.70
  -7  -3  11   68.19    5.20
  -7   3  11   52.39    5.80
  -7  -3 -11   48.30    7.30
   7  -4   0    8.50    3.50
   7  -4   0    6.60    3.80
  -7   4   0    3.50    2.90
  -7  -4   0    1.90    2.20
  -7   4   0    1.80    3.10
   7  -4   0   10.80    3.00
   7  -4  -1   25.00    3.90
   7  -4  -1   22.60    4.80
  -7  -4   1   25.60    3.00
   7   4   1   24.30    3.50
  -7  -4   1   21.30    3.10
   7  -4  -1   17.50    4.30
  -7   4   1   22.00    3.80
  -7  -4  -1   17.30    3.90
   7  -4   1   19.50    4.40
   7  -4   1   19.00    4.40
  -7   4   1   25.10    4.00
   7  -4   1   26.90    5.50
   7  -4  -2  262.17   18.80
   7  -4  -2  331.77   20.70
  -7  -4   2  261.37   17.80
   7   4   2  295.07   18.40
  -7   4  -2  279.07   20.90
  -7  -4   2  295.87   18.00
   7   4   2  276.67   18.90
   7  -4  -2  304.97   20.10
  -7   4   2  309.77   19.40
  -7  -4  -2  257.17   20.30
  -7   4   2  306.57   19.60
   7  -4   2  292.77   21.50
   7  -4   2  270.37   21.10
   7  -4   2  269.07   20.80
   7   4   3  470.95   33.80
   7  -4  -3  516.95   34.60
   7   4   3  540.15   33.60
   7  -4  -3  526.15   33.10
  -7   4   3  503.55   33.80
  -7   4   3  531.65   33.90
   7  -4   3  574.24   36.20
  -7  -4  -3  496.25   35.40
   7  -4   3  539.65   36.70
   7  -4  -4  177.38   13.40
  -7  -4   4  162.48   10.40
   7   4   4  166.98   13.10
  -7  -4   4  187.48   11.40
   7  -4  -4  157.98   12.10
   7   4   4  168.08   14.40
  -7   4   4  168.18   13.40
   7  -4   4  149.79   16.30
   7  -4   4  157.98   16.20
  -7  -4  -4  150.68   15.50
  -7   4   4  147.09   13.00
   7  -4  -5  141.29   11.10
  -7  -4   5  139.79    9.40
   7  -4  -5  130.39   10.20
   7   4   5  135.39    9.30
   7   4   5  148.39   12.00
   7  -4  -5  155.48   11.40
  -7   4  -5  123.89   14.20
   7   4   5  130.69   14.40
  -7   4   5  150.28   12.60
   7  -4   5  109.89   16.30
  -7  -4  -5  101.89   15.10
   7  -4   5  115.49   13.80
   7   4  -5  144.39   11.80
   7  -4   5  130.19   16.80
  -7  -4  -5  120.69   12.70
  -7  -4   6  100.99    8.00
   7   4   6   70.39   11.80
   7   4   6   86.99    8.20
  -7   4  -6  110.69   13.90
   7  -4  -6  103.69    8.60
   7  -4  -6  109.79    9.70
   7  -4   6   89.09   15.80
   7  -4   6   75.89   11.60
   7   4  -6  119.69   11.30
  -7   4   6  103.79   11.70
  -7  -4  -6  110.19    9.70
   7  -4   6   85.99   16.90
  -7  -4  -6   77.09   16.70
  -7   4   6   97.89    8.60
   7  -4   6   88.29   11.50
  -7  -4  -6  100.69   12.50
   7  -4  -7  644.14   40.80
   7   4   7  639.74   45.80
   7  -4  -7  663.93   41.40
  -7   4  -7  680.73   44.10
   7   4  -7  656.43   42.90
  -7   4   7  654.73   40.60
   7  -4   7  581.94   44.30
  -7  -4  -7  706.63   44.10
   7  -4   7  637.84   59.59
  -7   4   7  587.24   45.00
   7  -4   7  579.94   43.10
  -7  -4  -7  622.14   42.90
  -7  -4  -7  645.94   41.80
  -7   4   7  666.23   43.30
  -7   4  -8  255.77   19.00
  -7  -4   8  212.68   16.00
   7   4   8  195.58   22.20
  -7   4  -8  239.48   19.70
   7  -4  -8  232.48   16.30
   7  -4  -8  245.28   17.10
   7  -4   8  173.98   20.30
  -7  -4  -8  196.88   18.20
  -7  -4  -8  219.28   17.90
  -7   4   8  241.48   16.10
  -7   4   8  221.48   18.80
   7   4  -8  224.68   18.90
   7  -4   8  169.48   35.90
  -7   4  -9   -0.40    4.80
   7  -4  -9    0.70    4.10
   7  -4  -9    1.40    5.20
   7   4   9    0.40    2.60
  -7   4  -9   -1.80    5.50
   7  -4   9   -8.30   10.30
   7  -4   9  -11.10    7.30
  -7   4   9    4.80    3.90
   7   4  -9   12.40    6.30
  -7  -4  -9   -5.80    6.20
   7  -4 -10  207.78   15.50
  -7   4  10  224.38   14.70
  -7  -4 -10  217.48   18.00
   7  -4  10  184.28   20.70
  -7  -4 -11   -1.50    4.30
   7  -4  11   -7.50    3.90
  -7   4  11    5.10    2.20
   7  -5   0  426.26   30.20
   7  -5   0  453.65   30.00
  -7  -5   0  404.66   28.70
  -7   5   0  491.45   29.40
   7  -5  -1  671.63   42.90
   7  -5  -1  651.43   42.40
   7  -5  -1  607.34   41.20
  -7   5  -1  689.73   42.70
   7  -5   1  700.23   43.50
   7  -5   1  631.54   42.60
  -7   5   1  644.64   41.60
   7  -5   1  639.24   42.10
   7  -5  -2 2398.76  150.38
   7  -5   2 2514.45  152.48
   7  -5  -3 1608.44   95.19
   7  -5  -3 1544.25   93.29
   7  -5   3 1412.56   96.19
   7  -5   3 1464.95   95.69
   7  -5  -4  689.13   42.70
   7  -5  -4  634.24   42.40
   7   5   4  650.43   44.60
   7  -5  -4  670.13   42.90
  -7   5   4  718.13   43.90
  -7  -5  -4  675.73   46.30
  -7   5   4  740.53   44.10
  -7  -5  -4  637.24   43.40
   7  -5   4  659.03   43.10
   7  -5   4  705.53   47.70
   7  -5   4  655.43   43.30
   7   5   5  789.42   51.39
  -7   5  -5  770.72   51.69
   7  -5  -5  728.73   48.90
  -7  -5   5  793.12   48.20
   7  -5  -5  878.71   50.49
  -7  -5   5  797.62   48.10
  -7   5  -5  879.41   51.89
   7   5   5  760.12   49.10
   7   5  -5  715.13   48.70
   7   5  -5  694.53   49.10
   7  -5   5  818.62   55.49
  -7  -5  -5  826.12   50.59
   7  -5   5  753.62   49.90
   7  -5   5  755.02   55.49
   7  -5   5  764.02   50.49
  -7   5   5  782.82   50.59
   7   5  -5  780.22   50.39
  -7  -5  -5  777.52   53.99
   7   5   6  381.26   30.10
  -7  -5   6  423.36   25.70
   7  -5  -6  417.76   27.30
  -7   5   6  402.86   28.70
  -7  -5  -6  383.96   27.00
  -7  -5  -6  375.96   32.70
  -7   5   6  390.26   28.50
   7   5  -6  435.26   28.50
   7  -5   6  400.06   28.40
   7  -5   6  361.76   34.80
   7  -5   6  424.86   35.90
   7  -5   6  387.96   29.00
  -7   5  -7   62.79    9.30
  -7   5  -7   55.49   10.00
   7  -5  -7   51.79    8.10
   7   5   7   43.50   10.50
  -7  -5   7   59.29    5.90
   7  -5  -7   52.69    6.70
  -7   5   7   42.80    8.20
  -7  -5  -7   57.89    8.40
   7  -5   7   40.80   14.50
  -7   5   7   54.19    7.40
   7   5  -7   68.79   11.10
   7  -5   7   45.70   13.50
   7  -5   7   50.79   10.70
  -7  -5  -7   35.60    9.10
   7  -5   7   66.59    9.70
  -7   5   7   53.29    9.10
   7   5   8  447.66   33.70
  -7   5  -8  463.65   30.80
   7  -5  -8  474.35   29.20
  -7  -5   8  438.56   28.70
   7  -5  -8  448.26   29.80
  -7   5   8  457.35   28.60
  -7   5   8  399.06   31.00
  -7  -5  -8  452.55   30.30
   7   5  -8  449.66   31.40
  -7  -5  -8  383.36   30.60
  -7   5   8  513.25   33.00
   7  -5   8  419.66   32.30
   7  -5   8  365.16   39.80
   7  -5   8  411.66   34.20
  -7   5  -9  532.65   33.10
  -7   5  -9  523.25   31.90
   7  -5  -9  519.15   31.70
   7   5  -9  465.35   33.60
   7  -5   9  444.56   34.90
  -7   5   9  470.75   31.20
   7  -5   9  454.95   36.70
  -7  -5  -9  494.45   33.20
   7  -5 -10   95.39    8.00
  -7   5  10   97.89    7.50
   7  -5  10   87.09   12.00
  -7  -5 -10   88.59   10.80
   7  -5  10   71.29    9.70
  -7   6   0   -1.90    3.90
   7  -6   0    0.10    3.90
  -7  -6   0    2.80    3.20
  -7   6   0    4.30    3.50
   7  -6   0    6.80    4.80
   7  -6   0    3.90    4.70
   7  -6  -1 1318.47   80.59
  -7   6   1 1278.57   79.09
   7  -6   1 1103.19   79.19
   7  -6   1 1351.26   80.99
   7  -6   1 1289.87   80.29
   7  -6  -2    5.20    3.10
   7   6   2   12.90    3.80
   7  -6  -2   12.10    5.10
   7  -6  -2    3.20    3.70
   7  -6  -2    3.70    4.80
   7  -6  -2    3.60    3.10
  -7  -6   2    8.50    2.60
  -7  -6  -2    9.40    5.20
  -7   6   2    8.50    3.90
   7  -6   2    5.30    5.50
   7  -6   2   14.90    5.80
  -7   6   2   10.10    3.90
   7  -6  -3  261.77   18.20
   7  -6  -3  259.57   17.50
   7   6   3  240.48   17.60
  -7   6  -3  284.07   20.00
   7  -6  -3  257.47   18.50
   7   6   3  272.47   18.30
   7  -6  -3  274.17   20.10
   7  -6  -3  284.47   20.20
  -7  -6   3  266.47   16.80
  -7  -6  -3  246.38   20.60
   7   6  -3  253.37   17.60
  -7   6   3  246.68   18.80
   7  -6   3  276.57   22.60
   7   6  -3  233.38   17.60
   7  -6   3  243.98   18.20
   7  -6   3  270.47   22.10
  -7   6   3  277.47   18.60
  -7   6   3  292.57   19.10
  -7  -6  -3  257.17   20.90
   7  -6   3  241.68   18.20
   7   6   4  149.69   14.10
   7  -6  -4  195.58   11.90
   7   6   4  166.88   12.90
   7  -6  -4  168.48   13.80
   7  -6  -4  167.88   12.70
   7  -6  -4  180.38   15.40
  -7   6  -4  196.68   16.10
   7  -6  -4  174.68   12.70
  -7  -6  -4  158.28   14.00
  -7   6   4  184.18   14.50
   7   6  -4  178.38   14.80
   7  -6   4  176.58   18.50
  -7  -6  -4  143.39   16.60
   7  -6   4  162.08   13.50
  -7   6   4  164.48   12.30
   7  -6   4  175.68   18.00
   7   6  -4  168.98   12.70
   7  -6   4  170.58   13.90
  -7   6  -5   95.19   13.90
   7   6   5  111.49   11.80
  -7   6  -5  137.79   14.50
   7  -6  -5  115.89    9.70
   7  -6  -5  127.29   13.00
   7   6   5  112.49    9.60
   7  -6  -5  117.09   11.50
   7  -6  -5  108.49   10.60
   7  -6   5  123.89   11.70
   7   6  -5  127.49   12.20
   7  -6   5  134.79   17.50
   7  -6   5  123.99   12.30
   7   6  -5  103.69   10.00
  -7  -6  -5  120.19   12.90
  -7   6   5  127.79    9.90
  -7  -6  -5  113.79   15.70
  -7   6   5  121.59   12.60
  -7   6   5  110.39   12.00
   7   6  -5  129.29    9.60
   7  -6   5  154.78   18.50
  -7   6  -6   21.10    7.80
  -7  -6   6   24.60    3.10
  -7   6  -6    9.30    7.20
   7   6   6   18.90    6.60
   7  -6  -6   23.80    6.50
   7  -6  -6   17.60    5.10
  -7  -6  -6    8.70    6.70
   7  -6   6   15.60   10.00
  -7  -6  -6   -2.90    8.10
   7  -6   6   17.40    5.60
  -7   6   6   16.40    6.60
  -7   6   6   14.60    7.30
   7  -6   6   15.10   10.60
   7   6  -6   19.50    6.20
  -7   6   6   13.20    3.90
   7  -6   6   23.00    7.50
   7  -6  -7    8.30    5.00
   7  -6  -7    4.80    6.20
  -7  -6   7   11.10    2.60
  -7   6  -7    6.50    7.20
   7   6   7    8.70    6.60
  -7   6  -7    3.40    6.80
  -7   6   7    7.80    6.00
   7  -6   7   12.30    8.50
  -7  -6  -7   14.20    5.30
   7  -6   7   11.10   11.40
   7   6  -7   10.60    6.10
  -7   6   7    6.90    5.50
   7  -6   7   18.60    6.80
  -7  -6  -7   -7.60    7.20
   7  -6   7   12.40   11.00
  -7   6   7    6.80    3.70
  -7   6  -8  565.24   34.20
   7  -6  -8  487.15   36.40
   7  -6  -8  528.55   33.80
   7   6  -8  488.55   35.50
  -7  -6  -8  486.55   35.30
  -7  -6  -8  522.05   34.60
   7  -6   8  536.75   38.40
   7  -6   8  522.05   36.40
   7  -6  -9    6.00    4.40
   7   6  -9   12.80    5.50
  -7  -6  -9    1.20    7.10
  -7   6   9   13.00    3.30
   7  -6   9    8.80    6.30
   7  -6   9    0.50    8.00
   7  -6 -10   19.10    3.50
   7  -6  10   10.60    5.00
  -7   6  10   24.80    3.80
  -7  -6 -10   15.80    4.70
   7  -6  10   18.50    6.10
   7   7   0   49.30    7.80
  -7   7   0   37.90    5.40
   7  -7   0   59.29    8.70
   7  -7   0   48.10    8.50
  -7  -7   0   36.80    6.20
  -7  -7   1  591.54   37.50
   7  -7  -1  572.44   36.70
   7  -7  -1  604.34   39.60
   7   7   1  525.45   36.70
   7  -7  -1  519.35   37.40
   7  -7  -1  621.44   39.20
   7   7   1  623.74   37.10
   7  -7  -1  573.44   36.60
   7   7  -1  570.04   36.70
   7  -7   1  594.14   39.40
  -7  -7  -1  535.65   38.40
  -7  -7   2  628.74   39.80
   7   7   2  600.34   39.50
   7  -7  -2  640.94   39.40
   7  -7  -2  616.44   39.50
   7  -7  -2  565.64   40.00
   7  -7  -2  666.53   42.10
   7   7   2  666.73   40.00
   7  -7   2  582.14   39.60
   7  -7   2  669.93   43.50
   7   7  -2  636.14   39.60
   7   7  -2  580.44   39.50
   7  -7   2  636.44   42.60
   7  -7   2  635.64   39.90
  -7  -7  -2  594.94   42.00
   7  -7  -3 1379.36   89.59
   7  -7  -3 1565.04   91.89
   7  -7  -3 1478.75   90.29
   7   7   3 1459.25   89.59
   7  -7   3 1442.36   89.99
   7  -7   3 1433.96   89.79
   7  -7   3 1435.16   93.09
   7  -7   3 1354.66   93.49
   7   7  -3 1476.25   89.49
   7  -7  -4 1592.34   97.69
   7  -7  -4 1651.73   98.99
   7  -7  -4 1607.24   96.19
   7   7  -4 1505.55   97.89
  -7  -7  -4 1488.55  100.49
  -7   7   4 1555.44   98.09
   7   7  -4 1606.44   96.59
   7  -7   4 1569.64  101.39
   7  -7   4 1486.75  101.79
   7  -7  -5  397.66   27.30
   7  -7  -5  421.56   26.70
  -7   7  -5  427.66   29.40
   7  -7  -5  419.86   28.50
   7  -7  -5  421.36   29.60
   7   7  -5  394.26   26.50
   7   7  -5  410.16   28.90
  -7  -7  -5  373.66   31.90
  -7  -7  -5  397.86   28.40
   7   7  -5  377.46   26.90
  -7   7   5  387.96   28.40
   7  -7   5  439.56   28.20
  -7   7   5  423.06   26.30
  -7   7   5  394.06   28.70
   7  -7  -6   25.50    7.60
  -7   7  -6   31.20    7.20
  -7   7  -6   33.10    8.90
   7  -7  -6   26.70    6.10
   7  -7  -6   17.50    6.30
  -7   7   6   17.00    6.20
  -7  -7  -6   18.60    9.50
  -7   7   6   22.70    4.30
  -7  -7  -6   13.30    6.90
   7  -7   6   29.10   11.90
   7  -7   6   29.40    7.10
   7   7  -6   27.20    7.20
   7  -7   6   27.70    6.20
   7  -7   6   31.90   11.80
   7  -7  -7  327.67   23.30
  -7   7  -7  361.06   26.20
  -7   7  -7  350.66   23.90
   7  -7   7  347.47   26.10
   7   7  -7  299.37   24.90
   7  -7   7  355.16   25.30
  -7   7   7  332.87   22.10
  -7  -7  -7  344.87   25.40
  -7  -7  -7  304.97   23.50
   7  -7   7  346.47   32.40
  -7   7  -8   39.60    7.30
   7  -7  -8   55.09    6.70
  -7   7  -8   56.59    6.60
  -7  -7  -8   41.80    6.90
  -7  -7  -8   44.10    8.20
  -7   7   8   47.30    6.20
   7  -7   8   38.50    9.10
   7   7  -8   33.20    7.30
   7  -7   8   39.60    7.70
  -7   7  -9  207.38   15.10
   7  -7   9  200.88   16.60
  -7  -7  -9  186.88   14.80
   7   7  -9  182.68   15.60
  -7   7   9  193.08   13.00
   7  -7   9  200.68   17.40
   7  -7 -10  318.17   20.80
   7  -7  10  318.67   21.90
  -7  -7 -10  342.47   21.50
   7  -8   0    1.60    6.30
   7   8   0    3.10    3.80
   7  -8   0    2.60    4.50
   7   8   0   -1.50    3.80
  -7  -8   0    2.50    4.80
   7  -8   0    5.50    6.20
   7  -8   0    0.70    3.90
   7  -8  -1  130.99   10.90
   7  -8  -1  125.79   11.00
   7   8   1  113.59   10.70
   7  -8  -1  108.19   13.90
   7  -8  -1  105.79   13.70
  -7  -8   1  118.19   11.30
   7   8   1  113.79   10.70
  -7  -8  -1  129.19   12.80
   7  -8   1  116.59   10.90
   7   8  -1  132.19   10.80
   7  -8   1  107.69   14.30
  -7   8   1  113.09    9.40
   7  -8   1  129.29   10.90
   7   8  -1  114.09   10.70
   7  -8   1  103.69   13.80
  -7   8  -2  326.97   22.30
   7   8   2  318.07   21.10
   7   8   2  325.67   21.60
   7  -8  -2  262.37   24.10
   7  -8  -2  312.47   24.20
   7  -8  -2  318.87   21.00
   7  -8  -2  300.87   21.20
  -7  -8   2  310.97   21.50
   7   8  -2  299.97   21.10
  -7   8   2  309.47   22.00
   7   8  -2  327.57   21.00
   7  -8   2  288.47   25.10
   7  -8   2  280.77   21.00
  -7  -8  -2  276.67   21.20
   7  -8   2  316.07   21.40
  -7  -8  -2  296.67   23.90
   7  -8   2  314.07   24.70
   7   8  -2  276.17   21.40
   7  -8  -3 2202.28  126.59
   7   8  -3 1906.21  124.69
   7  -8   3 1982.00  128.29
  -7  -8  -3 1933.21  127.09
   7  -8   3 2027.90  127.69
   7  -8  -4  299.07   21.00
   7  -8  -4  289.67   19.30
   7   8   4  254.57   18.80
  -7   8  -4  270.77   22.00
   7  -8  -4  262.97   19.50
   7  -8  -4  274.67   22.50
   7  -8  -4  255.17   18.50
   7   8  -4  249.48   19.10
   7   8  -4  264.37   18.50
   7   8  -4  257.37   20.50
   7  -8   4  270.87   19.60
   7  -8   4  276.87   25.20
  -7  -8  -4  291.87   20.50
  -7   8   4  274.77   20.40
   7  -8   4  294.57   20.30
   7  -8   4  234.58   23.60
   7  -8  -5   28.30    5.50
  -7   8  -5   21.10    7.90
  -7   8  -5   32.60    7.00
   7  -8  -5   15.30    7.60
   7   8   5   26.80    4.50
   7  -8  -5   22.50    5.40
  -7   8   5   33.10    6.90
   7  -8   5   34.30    6.60
  -7  -8  -5   16.40    6.40
   7   8  -5   17.50    4.60
   7   8  -5   30.00    4.10
   7  -8   5   33.40   10.90
   7   8  -5   30.70    6.80
   7  -8   5   30.00    9.80
  -7  -8  -5   22.60    9.20
  -7   8   5   23.40    4.00
   7  -8  -6   -9.20    6.80
   7  -8  -6    4.30    5.10
  -7   8  -6   -0.60    6.70
   7  -8  -6  -12.60    9.00
  -7   8  -6    0.50    5.00
  -7   8   6    2.70    3.30
   7  -8   6    6.90    6.00
  -7   8   6    0.50    4.90
   7   8  -6    0.50    3.50
   7   8  -6    2.10    5.90
  -7  -8  -6   -6.30    6.70
   7  -8   6   15.40   10.10
  -7   8  -7   77.09    8.40
  -7   8  -7   71.59   12.20
   7  -8  -7   78.59   10.10
  -7  -8  -7   83.89    9.80
   7   8  -7   63.39   11.00
  -7   8   7   77.09    7.20
   7  -8   7   87.89   12.30
   7  -8  -8    3.00    4.60
  -7  -8  -8   -5.70    5.60
  -7  -8  -8    3.70    4.40
   7  -8   8   11.20    8.40
   7   8  -8    4.20    5.70
   7  -8   8    5.20    5.10
   7  -8  -9    0.50    3.20
  -7   8  -9   -2.30    3.20
   7   8  -9    3.40    3.70
  -7  -8  -9    3.90    3.30
   7  -8   9    5.40    4.60
   7  -8   9    3.00    3.80
   7   9   0  320.57   22.20
   7  -9   0  313.27   22.10
   7  -9   0  300.17   25.90
   7   9   0  333.57   22.20
   7  -9   0  314.07   22.30
  -7  -9   0  303.77   23.90
   7  -9  -1   26.30    9.10
   7   9   1   38.70    6.30
   7  -9  -1   30.50    9.10
   7  -9  -1   33.40    5.90
   7   9   1   33.80    5.70
  -7  -9   1   32.80    7.00
   7  -9  -1   32.70    6.30
   7   9  -1   40.60    6.10
  -7  -9  -1   30.50    5.50
  -7  -9  -1   26.50    8.70
   7  -9   1   36.60    6.70
   7   9  -1   29.80    6.20
   7  -9   1   27.10    9.20
   7  -9   1   38.60    6.10
   7   9  -1   25.10    5.20
   7   9   2  757.12   46.80
  -7  -9   2  692.83   49.80
   7  -9  -2  720.53   50.09
   7  -9  -2  759.52   47.00
   7  -9  -2  756.92   46.80
   7  -9  -2  670.63   50.49
  -7   9  -2  761.32   48.00
   7  -9   2  781.42   47.10
  -7  -9  -2  690.03   47.00
  -7   9   2  782.42   45.70
   7  -9   2  691.73   47.00
  -7  -9  -2  676.73   49.70
   7   9  -2  749.33   47.00
   7  -9   2  707.63   57.39
   7   9  -2  750.32   46.80
   7  -9  -3  630.14   46.30
   7  -9  -3  709.53   43.30
   7  -9  -3  751.82   43.00
  -7  -9   3  634.84   43.50
   7  -9  -3  636.94   43.20
   7   9   3  642.44   42.90
  -7   9  -3  727.93   44.70
   7   9  -3  643.94   43.20
  -7  -9  -3  651.93   46.90
   7  -9   3  678.23   43.60
   7   9  -3  688.03   42.90
   7   9  -3  618.14   43.90
   7  -9   3  626.34   48.00
  -7   9   3  723.73   44.10
   7  -9   3  715.63   43.50
  -7  -9  -3  678.43   43.60
   7  -9   3  618.24   47.10
   7   9   4  887.71   53.09
   7  -9  -4  875.51   53.59
   7  -9  -4  855.81   52.69
   7  -9  -4  894.11   53.29
   7  -9  -4  764.02   56.09
  -7  -9   4  781.12   53.49
   7  -9   4  823.82   58.39
   7  -9   4  879.81   59.49
   7   9  -4  765.12   54.29
   7  -9   4  878.41   53.79
   7   9  -4  821.72   53.19
   7  -9   4  865.21   53.99
  -7   9   4  879.71   54.29
   7   9  -4  798.72   52.69
   7  -9  -5   13.10    5.10
   7  -9  -5   23.70    6.00
   7  -9  -5   10.30    7.40
   7   9   5   17.60    3.90
  -7   9  -5   21.50    5.80
  -7   9  -5    7.00    6.80
   7  -9   5   24.10    6.10
   7   9  -5   17.60    6.00
  -7  -9  -5    4.70    7.20
  -7   9   5   16.40    5.80
   7  -9   5   30.20   10.40
   7   9  -5   14.80    4.40
  -7  -9  -5   22.60    7.10
  -7   9  -6  465.55   31.40
   7  -9  -6  439.86   29.70
  -7   9  -6  461.25   28.90
   7   9  -6  408.76   28.80
   7   9  -6  400.26   30.60
   7  -9   6  456.35   30.40
  -7  -9  -6  441.96   30.50
   7  -9   6  474.35   30.20
  -7   9  -7   75.99   10.50
   7  -9  -7   93.99    9.30
  -7  -9  -7   76.09   10.60
  -7  -9  -7   68.39    9.30
   7   9  -7   70.99   10.00
   7  -9  -8  138.99   11.20
  -7   9  -8  124.29   11.40
   7  -9   8  163.58   12.20
   7  -9   8  160.38   12.60
  -7  -9  -8  113.99   11.20
   7  10   0    2.30    3.70
   7 -10   0   10.20    5.90
   7 -10   0    3.20    5.10
   7 -10   0   14.00    8.80
   7  10   0   -1.80    4.90
   7 -10   0    6.60    7.30
  -7 -10   0    8.50    6.50
  -7  10  -1  196.38   15.10
   7 -10  -1  144.49   17.90
   7  10   1  167.98   14.30
  -7 -10   1  171.58   15.60
   7 -10  -1  132.49   20.20
   7 -10  -1  172.98   14.80
   7 -10  -1  177.78   14.40
   7 -10   1  180.98   19.30
  -7 -10  -1  168.18   14.10
   7  10  -1  153.98   14.20
   7 -10   1  177.98   14.70
   7 -10   1  144.29   17.30
  -7 -10  -1  153.08   16.70
   7 -10   1  178.48   14.70
   7  10   2  747.33   45.50
   7 -10  -2  756.42   45.40
  -7  10  -2  753.32   46.60
  -7 -10   2  746.63   46.90
   7 -10  -2  701.83   45.60
   7 -10  -2  635.74   48.70
  -7 -10  -2  657.23   48.60
   7 -10   2  692.33   45.70
   7 -10   2  725.33   45.60
  -7 -10  -2  684.53   45.70
   7 -10   2  682.33   50.39
   7 -10   2  676.23   49.50
   7 -10  -3  311.97   20.30
   7 -10  -3  287.67   20.80
   7  10   3  284.97   20.10
  -7  10  -3  302.27   22.30
   7 -10  -3  259.67   20.10
  -7 -10  -3  252.87   25.00
   7  10  -3  258.97   21.00
   7 -10   3  294.07   21.00
   7 -10   3  240.08   24.40
   7 -10   3  230.48   29.20
   7  10  -3  290.37   20.60
   7 -10   3  326.37   21.30
  -7 -10  -3  297.37   21.10
   7 -10  -4  142.19   11.70
   7 -10  -4  148.99   13.20
   7  10   4  144.79   12.00
  -7  10  -4  143.69   15.00
   7 -10  -4  155.68   13.40
   7  10  -4  138.59   12.50
   7 -10   4  176.68   13.80
  -7 -10  -4  153.28   14.20
   7  10  -4  136.29   13.90
   7 -10   4  174.38   13.90
   7 -10  -5  562.94   38.70
   7  10   5  586.34   38.10
   7 -10  -5  617.04   38.20
  -7  10  -5  609.14   38.10
  -7  10  -5  602.54   40.20
  -7 -10  -5  569.24   39.30
   7 -10   5  649.04   39.20
   7  10  -5  560.54   38.30
   7 -10   5  638.64   39.40
  -7  10  -6   30.70    6.00
  -7 -10  -6   35.30    6.40
   7  10  -6   26.50    6.40
   7 -10  -7  291.47   19.40
  -7  10  -7  260.87   19.70
   7 -10   7  296.27   20.00
   7 -10   7  293.97   19.70
  -7 -10  -7  270.57   18.60
  -7 -10  -7  287.17   19.80
  -7  10  -8   58.19    5.70
   7 -10  -8   62.49    6.20
   7  10  -8   51.59    5.80
   7 -10   8   65.89    6.60
  -7 -11   0  519.05   35.10
   7 -11   0  534.95   35.60
  -7 -11   0  503.45   37.70
   7 -11   0  567.44   35.50
   7  11   0  560.04   35.30
  -7 -11   1  606.14   43.80
  -7  11  -1  666.63   42.30
   7  11   1  661.83   41.60
   7 -11  -1  641.04   41.50
   7 -11  -1  636.94   41.70
   7 -11   1  664.33   41.90
  -7 -11  -1  642.44   41.60
   7  11  -1  647.64   41.60
  -7 -11  -1  597.34   44.30
   7 -11   1  643.64   41.70
   7 -11  -2   22.50    6.30
   7  11   2    8.60    4.80
   7 -11  -2   23.60    5.30
  -7  11  -2   20.90    6.40
   7  11  -2   16.50    5.50
   7 -11   2   17.50    5.20
   7  11  -2   17.40    4.70
   7 -11   2   27.80    6.50
  -7 -11  -2   16.80    5.70
   7 -11  -3  625.44   40.80
  -7  11  -3  617.04   41.70
   7 -11  -3  667.13   40.80
   7 -11  -3  602.74   40.10
   7  11   3  632.44   40.40
   7  11  -3  620.04   40.70
   7 -11   3  598.94   40.80
  -7 -11  -3  629.74   41.10
   7 -11   3  686.93   41.00
   7 -11  -4  114.59   11.30
  -7  11  -4  131.49   10.40
   7  11   4  119.99   10.40
  -7  11  -4  123.59   12.80
   7 -11   4  133.39   11.70
   7  11  -4  125.59   11.10
   7 -11   4  137.49   11.80
   7  11  -4  107.89   11.50
  -7 -11  -4  118.89   12.20
   7 -11  -5 1150.78   70.89
   7 -11  -5 1125.29   70.09
  -7  11  -6  283.57   20.20
   7 -11  -6  284.17   19.60
  -7 -11  -6  279.67   20.00
   7 -11   6  312.77   19.90
   7 -11   6  298.37   19.80
  -7 -11  -6  282.47   19.40
  -7  11  -7  229.68   15.30
   7 -11  -7  197.68   14.20
   7 -11   7  220.88   14.50
   7 -11   7  218.78   15.00
  -7 -11  -7  185.38   14.10
  -7  12   0    6.90    4.80
   7 -12   0   11.50    5.30
  -7 -12   0   13.70    5.50
   7 -12   0    3.90    4.40
   7  12   0    1.40    4.70
  -7  12  -1    2.40    4.70
   7  12   1   -1.70    4.60
   7 -12  -1   -1.10    4.20
   7 -12  -1    1.00    5.00
   7  12  -1   -0.20    4.40
   7 -12   1    5.00    5.20
  -7 -12  -1    0.60    4.50
   7 -12   1    4.40    4.50
   7  12   2  102.39    9.80
   7 -12  -2  101.59    9.60
   7 -12  -2  101.09   10.40
  -7  12  -2  103.19   11.30
  -7 -12  -2   90.09   10.00
   7  12  -2   81.79    8.70
   7  12  -2   95.29   10.10
   7 -12   2  116.69   10.80
   7 -12   2   96.09   10.40
  -7  12  -3  139.49   13.10
   7 -12  -3  118.59   11.30
   7  12   3  135.09   11.00
  -7  12  -3  141.89   11.40
   7 -12  -3  151.68   12.20
  -7 -12  -3  152.48   12.60
   7 -12   3  146.69   12.10
   7 -12   3  157.58   12.20
   7  12  -3  142.09   11.60
   7 -12  -4   36.80    6.70
  -7  12  -4   34.90    5.70
   7 -12  -4   34.70    4.80
   7  12   4   34.80    5.10
   7 -12   4   45.70    7.20
  -7 -12  -4   43.20    6.00
   7  12  -4   26.90    4.10
   7  12  -4   24.90    4.30
   7 -12   4   37.70    5.20
   7 -12  -5    6.90    3.60
  -7  12  -5   -0.20    3.50
   7  12  -5    6.10    2.30
   7 -12   5    9.80    3.40
   7 -12   5    5.90    3.20
  -7 -12  -5    2.50    3.70
  -7 -12  -5    1.90    2.90
   7 -13   0  121.19   11.30
   7 -13   0  105.89    9.70
   7  13   0  114.99    9.80
  -7  13   0  119.79   10.80
  -7 -13   0  103.89    9.30
  -7 -13   1  423.26   26.90
   7  13   1  414.66   26.90
   7 -13  -1  416.76   27.20
  -7  13  -1  414.06   27.60
   7 -13  -1  402.16   26.70
   7  13  -1  426.86   27.00
  -7 -13  -1  408.86   26.90
  -7  13   1  429.36   27.60
  -7 -13  -1  412.26   27.00
   7 -13   1  416.56   26.90
   7 -13   1  402.06   27.20
   7  13   2   93.29    8.10
  -7  13  -2   88.19    9.50
   7 -13  -2   83.89    8.60
  -7 -13   2   87.19    7.60
   7 -13  -2   82.89    7.50
   7  13  -2   93.09    8.20
  -7 -13  -2   95.49    8.90
   7 -13   2  106.59    9.20
  -7 -13  -2   89.99    8.30
  -7  13   2   99.59    9.20
   7 -13   2  103.49    9.00
   7 -13  -3  297.17   20.10
   7  13   3  306.07   19.70
  -7  13  -3  301.27   20.80
   7 -13   3  325.77   20.50
  -7 -13  -3  292.47   20.20
   7  13  -3  331.67   20.30
  -7 -13  -3  285.27   20.40
   7 -13   3  322.27   20.40
  -7  13  -4   67.49    6.80
  -7 -13  -4   72.89    6.90
   7 -13   4   74.59    6.80
   7 -13   4   72.59    6.60
  -7 -13  -4   68.29    6.40
   8   0   0 1149.39   71.09
  -8   0   1    3.30    1.90
  -8   0  -1   -4.20    3.20
   8   0   1   -2.00    2.40
   8   0   1    2.60    2.70
  -8   0   1    3.00    2.00
   8   0   1    2.30    2.20
   8   0  -1    1.20    2.10
   8   0   2 4688.43  286.27
   8   0   3   -0.90    3.50
  -8   0   3    4.40    2.30
   8   0   3    1.10    3.90
   8   0   3    0.50    3.60
  -8   0  -3   -0.50    5.20
   8   0   4  392.66   29.00
   8   0   4  444.06   30.70
   8   0   4  451.95   30.90
  -8   0   4  444.56   27.70
  -8   0  -4  399.96   31.70
  -8   0   4  418.56   27.90
  -8   0  -5   -1.60    5.70
  -8   0  -5   -1.50    4.90
  -8   0   5   10.00    3.40
   8   0   5   -4.70    6.40
   8   0  -5    7.60    2.80
   8   0  -5    9.10    2.50
  -8   0   5    0.00    3.60
   8   0   5    4.70    6.40
   8   0   5   13.80    4.10
   8   0   6  616.44   41.30
   8   0   6  649.54   42.10
   8   0  -6  606.74   39.30
   8   0   6  578.04   46.50
  -8   0  -6  688.53   41.80
  -8   0   6  629.84   41.20
  -8   0  -6  656.43   41.80
   8   0  -6  645.64   39.40
   8   0   6  626.44   46.00
  -8   0   7    1.30    4.20
   8   0  -7    9.20    3.60
   8   0   7   -1.00    7.70
   8   0  -7   -0.10    2.00
   8   0  -7    2.30    2.30
  -8   0  -7   -3.50    6.10
   8   0   7   -9.10    8.90
   8   0  -7   -1.00    2.30
  -8   0  -7    3.30    4.20
  -8   0  -8   48.60    9.90
  -8   0   8   61.69    8.70
   8   0   8   34.70    7.40
   8   0   8   53.89    9.70
   8   0   8   48.60   12.20
   8   0   8   27.50   12.60
  -8   0   9    3.40    3.10
   8   0   9  -18.90    8.00
  -8   0   9    4.90    4.60
  -8   0  -9  -14.80    6.60
  -8   0 -11   -6.00    4.10
  -8   0  11    0.40    2.10
   8  -1   0    3.70    2.50
  -8   1   0    5.30    2.80
  -8   1   0   -0.50    2.70
  -8  -1   0   -2.40    2.30
   8   1   0    2.50    2.30
  -8  -1   0   -0.80    2.50
   8  -1   0    6.00    2.50
   8  -1  -1 3507.45  206.08
   8   1   1 3103.69  206.28
   8   1  -1 3544.45  205.88
   8  -1   1 3359.36  206.68
  -8   1  -2   -3.10    3.80
   8   1   2    1.70    3.20
   8  -1  -2    5.40    2.20
  -8  -1   2    0.40    1.50
   8   1   2    2.70    2.40
   8  -1   2   -0.10    3.30
  -8   1   2   -0.50    2.20
   8   1  -2   -0.40    1.70
   8  -1   2   -2.30    3.70
   8  -1   2    0.80    3.30
  -8   1   2    0.80    2.00
  -8   1  -3  264.47   22.50
   8   1   3  325.27   21.30
  -8  -1   3  264.87   18.70
   8   1   3  251.67   19.50
   8   1   3  281.97   20.70
   8  -1  -3  319.87   18.50
   8  -1   3  301.87   21.80
  -8   1   3  279.47   19.30
  -8  -1  -3  266.47   22.10
   8   1  -3  306.97   18.10
   8  -1   3  319.97   21.70
   8  -1   3  241.48   20.30
  -8   1   3  278.37   19.10
   8   1   4  103.19   11.50
   8  -1  -4   85.49    8.50
   8   1   4   86.99   10.40
   8   1   4   88.99    9.80
  -8  -1   4  102.89    7.80
   8  -1  -4  100.29    7.20
  -8   1  -4   94.49   12.30
  -8   1   4   81.39    8.50
   8   1  -4   89.59    6.40
   8  -1   4   87.99   11.40
   8  -1   4   79.69   10.50
   8  -1   4   83.49   11.60
  -8  -1  -4   92.99   12.50
  -8   1   4   98.49    8.40
   8   1   5  135.89   12.20
  -8  -1   5  159.98   11.30
   8   1   5  147.59   11.50
   8   1   5  136.79   15.60
   8   1   5  122.69   14.30
   8  -1  -5  152.58   10.00
   8   1   5  136.59   13.20
   8  -1  -5  156.08   10.40
   8  -1   5  140.09   15.60
  -8   1   5  159.78   12.70
  -8  -1  -5  132.49   16.30
  -8  -1  -5  135.29   13.20
   8  -1   5  115.99   14.90
   8  -1   5  114.79   15.60
   8   1  -5  160.98    9.20
   8  -1   5  119.49   12.30
   8   1  -5  142.79    9.20
  -8   1   5  145.49   12.10
   8  -1   5  131.89   12.00
   8   1   6  317.87   27.60
   8   1   6  288.17   26.30
   8  -1  -6  358.46   21.30
   8  -1  -6  355.86   21.10
   8   1   6  339.17   23.70
  -8   1  -6  340.67   22.70
   8   1   6  313.87   25.30
  -8  -1   6  356.66   22.60
   8   1   6  305.97   22.70
   8   1  -6  286.47   21.60
   8  -1   6  317.97   23.20
   8   1  -6  299.07   20.20
  -8   1   6  319.77   23.50
  -8  -1  -6  349.27   24.10
  -8  -1  -6  367.56   23.40
   8  -1   6  307.67   28.20
   8   1  -6  329.27   22.60
  -8   1   6  325.97   23.00
   8  -1   6  303.47   23.80
   8  -1  -7  168.98   11.30
   8   1   7  127.89   18.00
   8   1   7  121.09   15.80
   8   1   7  150.18   15.60
  -8  -1   7  139.39   12.70
   8  -1   7  142.29   15.50
  -8   1   7  165.68   14.00
  -8   1   7  154.88   13.60
  -8  -1  -7  151.78   13.80
  -8  -1  -7  151.78   13.90
   8   1   8    3.90    7.60
   8   1   8    2.50   10.60
   8   1   8   13.10    9.30
   8   1   8   10.10    5.80
  -8  -1   8   18.90    5.40
  -8   1  -8    3.80    7.80
  -8  -1  -8   11.00    7.20
   8  -1   8    5.90    6.40
  -8   1   8   22.70    5.90
   8  -1   8   12.50    9.50
   8  -1   8   15.90    8.60
   8  -1   8   15.80   12.50
  -8  -1   9   36.00    9.90
  -8   1  -9   22.70    9.20
  -8   1   9   32.90    4.60
   8  -1   9   15.60    9.10
   8   1  10   53.99    8.20
  -8   1 -10   60.49    8.90
  -8  -1 -10   48.20    8.60
   8  -1  10   56.39    8.00
  -8   1 -11  300.47   20.10
   8   1  11  301.17   18.90
   8  -1  11  283.87   19.90
  -8   1  11  311.27   19.20
  -8  -1 -11  287.37   21.30
  -8  -2   0   38.50    4.90
   8  -2   0   34.20    4.40
  -8   2   0   37.60    5.10
   8  -2   0   31.30    5.30
   8  -2   0   29.60    4.80
   8   2   0   24.20    3.80
   8  -2  -1 2966.80  183.08
   8   2   1 2934.21  183.18
   8   2  -1 2931.61  182.68
   8  -2   1 3172.98  183.98
  -8  -2   2   36.30    3.40
   8   2   2   30.70    4.50
   8  -2  -2   30.00    3.70
  -8  -2   2   37.40    4.00
  -8  -2   2   21.40    3.00
  -8   2  -2   16.70    5.80
   8  -2  -2   27.50    4.00
   8   2   2   24.10    4.30
  -8   2   2   29.30    4.10
   8  -2   2   42.10    6.20
   8  -2   2   36.40    6.20
   8  -2   2   24.70    5.50
  -8  -2  -2   28.90    6.00
   8   2  -2   27.70    2.70
  -8   2   2   27.50    4.10
   8  -2  -3 1493.45   91.89
  -8   2  -3 1514.65   95.69
   8   2   3 1508.65   92.69
   8   2   3 1518.25   93.59
   8  -2   3 1438.56   94.29
   8  -2  -4  221.98   13.40
   8   2   4  194.68   16.80
   8   2   4  165.88   15.60
  -8   2  -4  196.08   17.70
   8   2   4  190.58   15.00
   8  -2   4  192.98   17.60
   8  -2   4  186.88   17.50
  -8   2   4  188.28   14.70
  -8  -2  -4  194.78   18.10
   8   2   5  353.56   29.40
   8   2   5  393.96   30.40
   8  -2  -5  459.25   26.40
   8   2   5  445.26   27.60
   8  -2  -5  412.56   25.90
   8   2   5  434.76   28.70
   8   2   5  400.26   26.60
   8  -2   5  403.36   27.40
   8  -2   5  423.06   31.90
  -8  -2  -5  405.76   32.00
  -8   2   5  389.56   27.70
  -8   2   5  439.26   27.70
  -8  -2  -5  407.76   28.40
   8  -2   5  367.56   27.60
   8  -2   5  346.47   30.80
   8   2   6   36.00    9.30
  -8  -2   6   26.90    4.60
   8  -2  -6   29.60    4.50
   8   2   6   21.20    6.30
   8   2   6   23.40    7.70
   8   2   6   28.20    5.00
  -8   2  -6   18.80    7.20
   8  -2  -6   23.90    3.70
   8   2   6    9.80    8.50
   8  -2   6   10.40    6.50
   8  -2   6   20.20    5.90
  -8  -2  -6   12.20    6.70
   8   2  -6   19.80    5.00
   8  -2   6    5.70    8.70
   8   2  -6   25.90    3.80
   8  -2   6    8.80    8.50
  -8   2   6   20.20    5.70
  -8   2   6   15.60    5.10
  -8  -2  -6   34.10    5.60
   8   2   7  217.58   33.30
   8  -2  -7  299.67   19.20
  -8   2  -7  324.27   20.50
   8   2   7  282.37   22.00
  -8  -2   7  278.87   19.90
   8  -2  -7  300.17   18.80
  -8   2  -7  290.27   23.80
   8   2   7  291.27   20.40
  -8   2   7  304.27   21.30
  -8   2   7  256.27   19.10
   8  -2   7  221.78   26.10
   8  -2   7  242.48   21.50
   8  -2   7  259.37   23.00
   8  -2  -8   11.50    3.60
   8   2   8    6.20    5.10
  -8   2  -8   21.50    4.90
   8  -2  -8   14.30    4.60
   8   2   8   -1.70    8.90
   8  -2  -8    4.40    4.10
  -8  -2   8   17.60    5.10
   8  -2   8    4.90    7.00
  -8   2   8   24.50    6.20
   8  -2   8   23.10   12.90
   8  -2   8    0.70    9.10
  -8  -2  -8   13.40    4.80
  -8   2   8   10.30    3.90
   8  -2   8   22.80    9.70
  -8  -2  -8    3.10    6.40
   8  -2  -9  172.78   11.40
  -8   2  -9  152.08   17.00
  -8  -2  -9  145.99   15.90
   8  -2   9  130.89   18.60
  -8   2   9  168.48   12.30
  -8  -2  -9  155.98   20.20
  -8   2 -10  305.17   23.40
  -8   2  10  368.06   21.50
   8  -2  10  309.17   26.80
  -8  -2 -10  296.37   24.40
  -8  -3   0    2.90    2.50
   8  -3   0    7.80    3.70
   8  -3   0    4.50    3.50
  -8   3   0    7.80    3.20
   8  -3   0   10.30    3.10
   8   3   0   -0.70    1.90
  -8   3   0    0.90    3.40
  -8  -3   1   60.99    5.40
   8   3   1   53.59    5.60
   8  -3  -1   68.49    7.20
   8  -3  -1   53.59    5.50
   8  -3  -1   52.59    9.00
  -8  -3   1   65.19    6.20
   8   3  -1   58.09    4.60
   8  -3   1   65.39    6.90
   8  -3   1   53.09    7.80
   8  -3   1   65.69    7.60
  -8  -3  -1   59.39    6.80
  -8   3   1   73.09    6.50
  -8   3   1   68.09    6.40
  -8   3  -2   91.99   10.30
  -8  -3   2  102.09    7.00
   8   3   2   89.49    7.70
  -8  -3   2   78.59    6.40
   8   3   2   97.69    7.80
   8  -3  -2   85.19    8.50
   8  -3  -2   97.59    8.60
   8  -3  -2   90.69    7.20
  -8  -3  -2   84.19    9.30
   8  -3   2   84.39    9.70
   8  -3   2  107.79   10.20
  -8   3   2   95.99    8.10
  -8   3   2   82.39    7.90
  -8   3  -3  101.19   11.80
   8   3   3  108.59    9.40
   8  -3  -3  123.29    9.60
   8  -3  -3  120.49    8.70
   8   3   3  101.99   10.20
  -8   3   3  120.69    9.80
   8  -3   3   86.69   13.60
  -8  -3  -3  105.29   11.80
   8  -3   3  114.79   11.90
  -8   3   3  113.09    9.60
   8  -3   3   90.19   11.50
  -8  -3   4  112.79   11.30
   8  -3  -4  128.39    9.60
   8   3   4  124.29   12.70
  -8  -3   4  144.29    9.10
   8   3   4  154.68   11.50
  -8  -3  -4  110.09   13.80
   8  -3   4  120.89   14.20
  -8   3   4  132.09   11.30
   8  -3   4  103.89   13.70
  -8   3   4  113.99   10.90
   8  -3   4  125.59   17.90
   8   3   5  213.88   16.70
   8  -3  -5  205.18   13.90
   8   3   5  199.78   18.40
   8   3   5  212.38   13.90
   8  -3  -5  230.18   14.60
  -8  -3  -5  167.58   19.50
  -8   3   5  196.28   15.80
   8  -3   5  199.88   16.00
  -8  -3  -5  204.68   16.80
  -8   3   5  191.38   13.70
   8  -3   5  194.48   27.40
   8   3  -5  198.38   17.10
   8  -3   5  167.18   19.00
   8  -3   5  194.48   20.20
   8  -3  -6    8.30    3.30
  -8   3  -6    4.70    7.50
   8   3   6    5.50    6.80
   8   3   6    1.90    7.50
   8  -3  -6    8.80    4.20
  -8  -3   6    8.00    3.30
  -8  -3  -6    0.50    6.80
   8  -3   6    0.20    8.60
   8   3  -6    8.90    2.80
  -8  -3  -6   10.00    4.20
   8   3  -6   13.00    4.80
   8  -3   6    4.80    6.40
  -8   3   6    5.10    5.10
  -8   3   6    9.50    2.90
   8  -3   6    4.00    4.90
   8  -3   6    3.00    8.80
  -8  -3  -6   11.90    8.40
   8   3   7  -10.10    8.20
   8  -3  -7   -1.40    3.50
   8   3   7    4.50    3.90
  -8   3  -7  -12.20    7.40
   8  -3  -7    4.50    4.60
  -8  -3  -7    0.50    4.90
   8  -3   7   -7.40   10.00
   8  -3   7   -9.30    8.80
  -8  -3  -7   -6.70    6.70
   8   3  -7    8.80    5.20
   8  -3   7   -6.30    7.80
   8  -3   7   -5.00    5.60
  -8   3   7    1.90    3.40
   8  -3  -8   28.60    4.70
  -8   3  -8   16.80    8.80
   8  -3  -8   36.60    5.80
  -8  -3   8   28.90    5.10
   8   3   8   23.90    4.90
  -8   3  -8   36.40    6.10
  -8  -3  -8   24.20    6.80
  -8   3   8   33.90    4.90
  -8   3   8   25.60    6.90
  -8  -3  -8   29.20    7.00
   8  -3   8   17.90    9.80
  -8  -3  -8   38.70   10.50
   8  -3   8   15.80    7.00
   8  -3   8    9.50   11.30
   8  -3   8   21.70   11.90
   8   3  -8   38.80    7.30
   8  -3  -9   52.59    6.90
  -8   3  -9   38.00    8.60
   8   3   9   40.90    6.40
   8  -3  -9   59.89    6.70
   8  -3   9   25.90   10.70
  -8  -3  -9   43.60    8.10
  -8   3   9   54.49    6.90
   8  -3   9   35.60    8.70
  -8   3 -10    4.90    4.60
  -8  -3 -10   -4.80    6.10
   8  -3  10  -11.80    8.30
   8  -3  10   -7.40    5.40
   8  -3  11   54.79    7.40
  -8  -3 -11   60.69    8.70
  -8   3  11   71.49    5.60
   8  -4   0 2403.66  141.39
   8   4   0 2205.48  140.49
   8   4   1 2241.08  134.49
   8  -4  -1 2109.19  134.59
  -8  -4   1 2273.67  135.29
   8  -4   1 2167.18  135.49
   8  -4  -2   82.69    8.70
   8   4   2   77.09    7.40
   8  -4  -2   76.89    8.60
  -8   4  -2   87.39    9.70
  -8  -4   2   72.69    5.80
  -8  -4   2   79.69    6.10
   8  -4  -2   76.69    6.90
  -8   4   2   86.69    7.90
   8  -4   2   88.79    9.70
   8  -4   2   77.79   10.00
  -8   4   2   85.79    7.90
  -8  -4  -2   69.29    8.90
   8   4   3 1835.02  106.39
   8  -4  -3 1706.33  105.59
   8  -4   3 1540.85  108.69
   8  -4   3 1782.62  109.69
   8  -4  -4  150.08   12.10
   8   4   4  130.19   11.80
   8  -4  -4  134.39   10.60
   8  -4  -4  145.49   11.20
  -8   4   4  151.28   12.40
   8  -4   4  144.29   11.80
  -8   4   4  137.29   17.40
  -8  -4  -4  134.99   12.20
   8  -4   4  153.78   17.30
  -8   4   4  149.09   10.30
   8  -4   4  154.78   15.90
  -8  -4  -4  143.09   15.40
   8   4   5 1521.75   98.39
  -8   4  -5 1516.35   99.39
   8   4   5 1656.33   99.69
   8  -4   5 1566.54  102.89
   8   4  -5 1633.74  100.69
  -8  -4  -5 1364.96  101.59
   8  -4   5 1755.42  103.19
  -8   4  -6   25.00    9.00
  -8   4  -6   38.80    6.40
   8  -4  -6   33.50    6.10
  -8  -4   6   35.20    4.50
   8   4   6   24.40    9.20
   8  -4  -6   44.30    6.50
   8   4   6   30.40    4.60
  -8   4   6   37.60    7.50
  -8  -4  -6   21.90    7.90
   8   4  -6   35.80    6.40
  -8   4   6   41.80    7.60
   8  -4   6   25.40   10.90
   8  -4   6   49.30    7.40
  -8  -4  -6   17.40    9.80
  -8   4   6   32.20    4.60
   8  -4   6   29.70   10.90
  -8  -4  -6   39.20    5.90
   8  -4   6   34.40    8.30
   8  -4  -7  329.87   22.50
  -8   4  -7  344.67   27.10
   8   4   7  303.97   28.30
   8  -4  -7  373.86   23.20
  -8  -4   7  373.36   22.60
   8  -4   7  327.97   25.10
   8   4  -7  345.37   24.50
   8  -4   7  260.47   30.80
  -8  -4  -7  301.67   25.40
   8  -4   7  309.47   26.60
  -8  -4  -7  328.67   23.70
  -8   4   7  354.96   25.10
  -8   4   7  336.97   22.20
   8  -4   7  300.87   32.80
  -8   4  -8   20.30    5.70
   8  -4  -8   29.90    6.30
   8   4   8   29.40    4.30
   8   4   8   33.90   10.20
   8  -4  -8   36.20    5.30
  -8  -4   8   40.90    6.30
   8  -4   8   28.40   10.80
  -8  -4  -8   17.60    6.70
  -8  -4  -8   17.60    7.70
  -8   4   8   31.70    7.20
   8  -4   8   28.90    7.90
   8   4  -8   30.80    7.00
  -8   4   8   25.50    9.80
   8  -4   8   33.30   14.80
  -8   4   8   32.60    5.00
  -8   4  -9 1736.63   97.39
   8  -4   9 1380.86   99.99
   8  -4 -10  117.59    8.20
  -8  -4 -10  125.29   12.60
   8  -4  10  100.29   17.70
  -8   4  10  103.09   10.30
   8  -5   0    1.60    3.20
  -8   5   0   -0.30    3.90
  -8   5   0    5.10    3.70
   8  -5   0    0.80    4.00
  -8  -5   0    1.30    2.90
   8  -5  -1  224.08   16.70
   8  -5  -1  181.08   14.20
  -8   5  -1  216.48   16.00
  -8  -5   1  193.28   14.00
   8  -5  -1  209.78   16.10
   8  -5   1  213.78   17.20
  -8  -5  -1  193.28   15.30
  -8   5   1  203.38   14.90
   8  -5   1  196.08   15.30
  -8   5   1  216.28   15.10
   8  -5   1  193.58   16.30
   8  -5  -2  824.92   53.09
   8  -5  -2  739.43   50.89
  -8  -5   2  836.22   50.69
   8  -5  -2  825.62   52.39
  -8   5   2  844.02   51.69
  -8  -5  -2  755.02   52.69
   8  -5   2  792.02   53.09
   8  -5   2  885.31   54.39
   8  -5   2  829.92   53.49
  -8  -5   3   92.19    6.40
   8  -5  -3   91.69    8.70
   8  -5  -3   93.19   10.20
   8   5   3   81.69    6.20
  -8  -5   3   89.59    6.20
   8  -5   3  110.99   12.80
  -8  -5  -3   76.39   11.50
   8  -5   3   84.09    8.50
   8  -5   3   95.79    8.70
  -8   5   3  103.49    9.40
  -8   5   3   93.99    9.40
  -8   5   3   90.89    7.40
   8  -5  -4   13.00    5.20
   8   5   4    2.50    3.70
   8   5   4    5.80    4.40
   8  -5  -4   -1.90    2.70
   8  -5  -4    4.20    4.50
   8  -5  -4    1.30    3.30
  -8   5  -4   12.50    4.40
   8   5   4   -2.90    2.80
  -8   5   4    2.70    2.80
   8  -5   4    2.00    4.10
  -8   5   4    6.80    4.80
   8  -5   4   12.10    6.70
   8  -5   4   -1.30    6.10
  -8  -5  -4    1.50    6.90
   8   5  -4    9.20    2.90
  -8   5   4   -1.70    4.10
   8   5  -4    5.00    2.80
   8  -5  -5  221.18   16.10
   8  -5  -5  226.68   16.50
   8   5   5  186.58   14.90
  -8   5  -5  245.18   17.70
   8   5   5  236.98   18.10
   8  -5  -5  191.98   15.20
  -8   5   5  203.78   16.90
   8  -5   5  206.18   16.80
   8  -5   5  226.48   22.00
   8  -5   5  214.98   16.70
   8   5  -5  198.58   14.80
  -8   5   5  190.58   14.70
   8   5  -5  215.98   16.60
  -8  -5  -5  228.68   17.70
   8  -5   5  212.68   22.10
  -8   5   5  217.18   17.40
  -8  -5  -5  243.18   21.80
   8  -5  -6   75.19    8.70
   8   5   6   70.79    7.60
   8  -5  -6   79.99    9.70
  -8   5  -6   55.09   10.90
  -8  -5   6   89.39    6.60
  -8   5   6   61.09   10.30
  -8  -5  -6   56.29   13.10
   8   5  -6   79.19   10.80
   8  -5   6   85.49   11.70
   8  -5   6   63.39   14.20
  -8   5   6   83.09   10.70
  -8  -5  -6   86.09    8.90
  -8   5   6   83.29    8.20
   8  -5   6   85.99   11.00
  -8   5  -7    0.00    7.80
   8  -5  -7   -2.10    5.60
  -8   5  -7    4.90    6.00
  -8  -5   7    4.70    2.90
   8  -5  -7    2.90    4.50
   8   5   7   -4.00    7.20
   8  -5   7    4.50    9.30
  -8   5   7   -0.30    3.60
   8  -5   7    2.10    6.20
   8  -5   7    5.30    7.80
   8  -5   7    0.20   10.10
  -8  -5  -7  -11.00    6.80
   8   5  -7    5.00    5.60
  -8   5   7    4.50    4.70
  -8   5   7   -1.30    5.40
  -8  -5  -7    8.70    4.80
  -8   5  -8   99.09   10.80
   8  -5  -8   79.79    9.10
   8  -5  -8   72.99    9.90
  -8   5  -8   83.29   10.20
   8  -5   8   75.69   13.10
   8  -5   8   85.29   10.80
  -8  -5  -8   65.39   10.40
  -8   5   8   70.89    8.30
   8   5  -8   68.89   10.90
  -8  -5  -8   71.79   10.70
  -8   5  -9    3.00    6.60
  -8   5  -9   -2.40    4.30
   8  -5  -9    1.80    3.90
   8  -5   9    0.60    8.80
  -8   5   9   -0.20    3.10
  -8  -5  -9   -4.60    5.10
   8  -5   9   -4.00    5.70
   8  -5 -10   96.99    7.30
   8  -5  10   86.29   10.20
   8  -5  10   69.89   10.20
  -8   5  10   90.89    7.30
  -8  -5 -10   94.49   10.30
  -8   6   0 2798.72  168.48
   8  -6   0 2664.33  167.78
   8  -6  -1   68.59    9.00
   8   6   1   77.39    7.30
   8  -6  -1   64.09    7.10
   8   6   1   62.79    6.80
   8  -6  -1   68.89    9.60
   8  -6  -1   51.49    6.60
  -8  -6   1   67.99    6.90
   8  -6  -1   62.79    7.40
   8  -6   1   64.09    7.20
   8  -6   1   67.29    9.00
  -8   6   1   76.19    8.50
   8  -6   1   72.99   10.20
   8  -6   1   74.09   10.50
  -8   6   1   72.19    6.20
   8   6  -1   54.89    6.50
   8  -6   1   66.29    7.00
  -8   6   1   66.39    7.80
  -8  -6  -1   53.99    9.30
   8   6  -1   67.19    7.10
   8   6   2 1561.54   98.59
   8  -6  -2 1600.44  100.79
   8  -6  -2 1526.15   98.59
   8  -6  -2 1586.64   99.99
  -8   6   2 1670.53   99.19
   8  -6   2 1621.54  101.79
   8   6   3   38.80    5.70
   8   6   3   35.30    5.20
   8  -6  -3   44.30    7.70
   8  -6  -3   40.40    6.20
   8  -6  -3   34.10    5.50
  -8  -6   3   43.40    4.50
   8  -6  -3   48.30    6.50
  -8   6  -3   50.39    8.20
   8  -6   3   51.89    9.10
   8   6  -3   46.80    6.20
  -8   6   3   46.50    5.50
   8  -6   3   49.00    7.20
  -8  -6  -3   50.79    9.10
   8  -6   3   45.40    9.80
   8   6  -3   42.70    6.30
   8  -6   3   48.20    7.30
  -8   6   3   64.09    7.90
  -8  -6  -3   40.50    7.00
  -8   6   3   44.30    6.70
   8  -6  -4  995.00   61.49
   8   6   4 1109.19   63.19
   8   6   4  948.91   61.89
   8  -6  -4  938.81   61.89
   8  -6  -4 1035.30   63.79
  -8   6   4  975.00   63.19
  -8   6   4  945.01   62.89
   8   6  -4  975.70   62.69
   8   6  -4  901.71   61.79
   8  -6   4 1059.99   67.59
  -8  -6  -4  945.41   65.69
   8  -6   4 1122.09   67.09
   8  -6   4  993.60   62.39
  -8  -6  -4  959.80   62.79
   8  -6   4 1070.39   62.79
   8   6  -4  925.11   61.69
   8  -6  -5   12.30    5.90
   8   6   5   14.60    4.10
   8   6   5   16.20    4.40
  -8   6  -5   14.50   11.90
   8  -6  -5   10.20    5.40
   8   6  -5   13.80    3.90
  -8   6   5   11.80    4.00
  -8   6   5   16.70    6.20
   8  -6   5   12.60    8.20
   8   6  -5   18.40    5.30
   8  -6   5   26.40   10.00
   8  -6   5   16.70   10.40
   8   6  -5   15.00    3.50
  -8  -6  -5    4.60    8.00
   8  -6  -6  522.25   32.70
   8   6   6  458.65   32.20
   8  -6  -6  436.06   33.10
   8   6   6  472.55   33.40
  -8   6  -6  513.05   35.50
   8  -6   6  548.95   41.60
  -8  -6  -6  523.55   34.90
   8  -6   6  573.64   34.40
  -8   6   6  465.55   34.40
  -8   6   6  484.25   31.90
  -8   6   6  491.15   34.40
   8  -6   6  522.05   41.40
   8  -6   6  556.64   35.00
   8   6  -6  484.35   34.20
  -8   6  -7   57.19    8.40
   8   6   7   62.89    8.80
  -8   6  -7   56.79    9.00
   8  -6  -7   41.40    7.70
   8  -6  -7   49.90    6.90
  -8   6   7   56.59    7.10
   8  -6   7   67.59   10.60
   8   6  -7   42.50    7.60
   8  -6   7   41.30   14.60
  -8  -6  -7   54.49    7.40
  -8  -6  -7   33.10    9.30
   8  -6   7   45.40    7.80
  -8   6   7   42.10    7.90
   8  -6   7   63.09   14.90
   8  -6  -8 1785.92  111.39
   8  -6  -9   10.60    4.10
  -8   6  -9   12.30    4.20
  -8  -6  -9   10.70    5.40
  -8   6   9   11.30    3.00
   8  -6   9   21.30    8.30
   8  -6   9   16.50    5.90
   8  -6 -10  439.36   27.10
  -8   6  10  418.66   26.80
   8  -6  10  420.26   29.30
   8  -6  10  409.36   28.40
  -8  -6 -10  471.45   28.30
   8  -7   0    2.80    5.70
   8  -7   0    0.00    3.80
   8  -7   0    1.30    5.40
   8   7   0    0.30    3.50
  -8   7   0   -1.10    3.30
  -8  -7   0    4.70    4.30
   8  -7   0    0.10    3.40
   8  -7  -1 1035.30   66.09
   8  -7  -1 1043.60   65.39
   8  -7  -1  886.11   63.49
  -8   7  -1 1073.39   62.49
   8  -7   1  992.40   63.09
  -8  -7  -1 1064.69   65.09
   8  -7   1  986.40   66.29
   8  -7   1 1010.70   65.69
   8   7  -1  986.00   63.09
   8  -7  -2  538.05   33.50
   8  -7  -2  497.25   33.20
   8  -7  -2  559.84   36.30
   8  -7  -2  520.95   36.70
  -8  -7   2  466.85   33.50
  -8   7  -2  568.24   34.70
   8  -7  -2  506.75   34.40
   8   7   2  530.55   34.00
   8   7   2  514.65   33.70
  -8   7   2  569.24   34.70
   8  -7   2  526.75   37.70
   8   7  -2  503.35   33.60
   8  -7   2  529.55   33.90
  -8  -7  -2  514.25   36.20
   8  -7   2  528.05   33.80
   8  -7   2  520.35   36.90
   8   7  -2  511.45   33.70
  -8  -7  -2  457.15   35.10
   8  -7  -3  156.18   13.20
   8  -7  -3  162.38   14.00
   8   7   3  154.98   13.10
   8  -7  -3  174.58   16.30
   8   7   3  187.58   14.20
  -8  -7   3  177.18   12.30
   8  -7  -3  166.38   12.60
   8  -7  -3  164.68   13.10
  -8   7  -3  184.58   15.00
  -8  -7  -3  160.88   16.60
   8  -7   3  189.08   14.10
  -8  -7  -3  152.48   13.80
   8   7  -3  171.18   13.10
   8  -7   3  179.48   18.30
   8  -7   3  168.68   13.80
  -8   7   3  172.38   14.40
   8   7  -3  159.28   13.30
   8   7  -3  168.98   13.50
   8  -7   3  159.48   17.00
  -8   7   3  186.88   12.30
   8  -7  -4    6.70    6.40
   8  -7  -4   10.20    6.10
   8   7   4    1.30    3.60
  -8   7  -4    3.80    5.70
   8  -7  -4    4.60    4.30
   8  -7  -4    4.80    4.20
   8  -7   4   10.00    7.10
   8  -7   4   10.30    7.80
   8   7  -4    9.30    3.50
   8   7  -4   11.40    4.60
   8   7  -4   10.90    4.40
  -8  -7  -4   -0.80    7.20
  -8   7   4    4.60    3.90
  -8   7   4   11.50    6.10
   8  -7   4   10.30    8.90
  -8   7   4    2.00    4.90
   8   7   5   -2.60    3.60
   8  -7  -5    3.20    6.00
  -8   7  -5    6.20    6.30
   8  -7  -5    4.70    6.20
   8  -7  -5   12.20    4.90
  -8   7  -5   14.60    6.90
  -8   7   5    5.90    3.50
   8   7  -5    8.10    4.80
   8  -7   5    8.90    8.50
  -8   7   5    2.10    7.90
   8   7  -5    8.50    3.40
  -8   7   5    3.30    5.40
  -8  -7  -5    0.50    6.20
  -8  -7  -5   -2.60    7.40
   8  -7   5    7.90    4.80
   8  -7   5   10.90    5.60
   8   7  -5    5.40    4.00
   8  -7   5    7.50    8.00
  -8   7  -6  299.77   22.20
   8  -7  -6  284.47   20.40
   8  -7  -6  260.77   21.20
   8  -7   6  309.77   28.50
  -8   7   6  292.27   19.20
   8   7  -6  269.57   21.60
  -8   7   6  277.17   21.60
   8  -7   6  298.97   21.80
   8  -7   6  315.47   29.00
  -8  -7  -6  223.88   25.60
  -8  -7  -6  279.37   22.20
   8  -7   6  316.47   22.30
  -8   7  -7   15.80    6.10
  -8   7  -7   16.50    6.90
   8  -7  -7   12.70    5.20
   8  -7   7   23.70    6.50
  -8  -7  -7   23.90    5.60
  -8  -7  -7    5.30    7.70
  -8   7   7   14.30    3.80
   8   7  -7   15.60    5.70
   8  -7   7   31.20    8.60
  -8   7  -8    6.70    5.00
  -8   7  -8    9.40    3.90
   8  -7   8    8.10    7.10
  -8  -7  -8    9.40    5.80
   8  -7   8   13.80    5.60
  -8   7   8   11.10    3.10
   8   7  -8   12.70    5.30
  -8   7  -9    6.80    3.40
   8  -7  -9   10.60    3.70
   8  -7   9   10.50    5.90
  -8  -7  -9    6.40    4.20
   8  -7   9    8.70    4.70
  -8   7   9    5.30    2.40
   8   8   0   26.10    5.20
  -8  -8   0   29.30    6.80
   8   8   0   26.00    5.40
  -8   8   0   26.50    4.40
   8  -8   0   29.50    5.40
   8  -8   0   36.90    8.50
   8  -8   0   33.70    5.90
   8  -8  -1  742.83   51.69
   8  -8  -1  703.93   52.19
   8   8   1  782.32   49.10
  -8  -8   1  772.22   50.19
   8  -8  -1  772.92   49.00
   8   8   1  756.42   49.30
  -8   8   1  793.62   48.20
   8  -8   1  756.92   52.99
   8  -8   1  777.62   49.20
   8   8  -1  805.92   49.30
   8  -8   1  739.53   52.09
   8  -8   1  787.72   49.10
  -8  -8  -1  824.82   51.59
   8  -8  -2   39.80    8.90
   8  -8  -2   34.60    6.20
  -8  -8   2   41.50    6.10
   8   8   2   34.90    8.90
  -8   8  -2   43.20    6.90
   8  -8  -2   33.90    5.60
   8  -8  -2   42.90    9.00
   8   8   2   33.20    5.70
   8  -8   2   39.00    9.50
   8   8  -2   33.00    5.50
  -8   8   2   34.20    6.60
   8  -8   2   30.70    6.60
   8  -8   2   34.10    9.80
  -8  -8  -2   23.50    7.70
   8  -8   2   52.99    8.30
   8   8  -2   43.20    9.30
  -8  -8  -2   35.50    6.00
   8  -8  -3  210.38   15.00
   8  -8  -3  217.98   19.20
   8  -8  -3  208.98   15.70
  -8   8  -3  217.78   17.20
  -8  -8   3  202.68   14.90
   8   8   3  201.38   15.50
   8  -8  -3  173.48   16.80
  -8  -8  -3  200.78   19.60
   8  -8   3  176.78   20.20
  -8   8   3  204.18   16.80
   8   8  -3  183.38   15.60
  -8   8   3  230.88   14.20
  -8  -8  -3  186.88   17.60
   8   8  -3  192.38   15.80
   8   8  -3  208.68   15.30
   8  -8   3  199.58   16.00
   8  -8   3  213.78   16.20
   8  -8  -4   17.10    7.50
  -8   8  -4   38.50    7.80
   8  -8  -4   29.20    5.70
  -8  -8   4   19.20    4.10
   8   8   4   21.50    5.10
   8  -8  -4   24.10    5.80
   8  -8  -4   18.20    3.80
   8  -8  -4   35.70    7.90
   8  -8   4   35.70    6.00
  -8  -8  -4   24.60    8.80
   8   8  -4   25.90    5.60
   8  -8   4   39.70   11.10
   8   8  -4   25.50    5.20
   8   8  -4   28.50    4.60
  -8   8   4   29.20    4.10
  -8  -8  -4   32.60    7.10
   8  -8   4   35.30    9.40
   8  -8   4   34.70    6.50
  -8   8   4   31.30    6.50
   8  -8  -5   35.70    8.10
   8  -8  -5   32.50    8.40
   8   8   5   40.70    5.60
  -8   8  -5   34.60    7.90
  -8   8  -5   47.60    7.70
   8  -8  -5   36.60    6.30
   8  -8  -5   30.90    5.30
  -8   8   5   51.79    7.80
  -8  -8  -5   32.50    7.30
  -8  -8  -5   37.30   10.40
   8   8  -5   30.50    6.10
   8  -8   5   39.80   10.30
   8   8  -5   23.50    4.90
   8   8  -5   45.10    6.10
   8  -8   5   47.20   11.50
  -8   8  -6  136.29   14.80
  -8   8  -6  132.49   13.10
   8  -8  -6  147.69   12.70
   8  -8   6  133.39   19.20
  -8  -8  -6  111.59   14.60
   8  -8   6  162.38   14.10
  -8   8   6  143.79   10.60
   8   8  -6  123.59   13.30
   8  -8  -7  789.62   51.29
  -8   8  -7  812.22   52.29
  -8   8  -7  797.52   50.89
   8  -8   7  891.31   52.89
  -8  -8  -7  795.42   52.29
   8  -8   7  783.02   51.99
  -8   8  -8    9.20    4.30
   8  -8  -8    6.10    4.20
  -8  -8  -8   -0.10    6.30
   8   8  -8   14.50    4.50
   8  -8   8   20.30    5.70
   8  -8   8   20.60    6.40
  -8   8   8    8.40    2.50
  -8  -8  -8   12.90    4.50
  -8   8  -9  317.27   20.80
   8  -8  -9  302.57   20.70
   8  -8   9  303.47   21.40
   8  -8   9  319.97   21.90
  -8  -8  -9  352.76   21.20
   8   9   0   -4.30    4.60
   8   9   0    6.60    4.60
   8  -9   0    5.80    4.70
   8  -9   0    4.10    5.40
   8  -9   0    6.50    7.60
   8  -9   0    1.80    6.90
  -8  -9   0    2.80    5.60
   8  -9  -1   99.09   14.60
   8  -9  -1  100.09   10.80
  -8  -9   1  102.59   11.50
   8  -9  -1  105.19   11.20
   8   9   1   99.19   10.40
   8   9   1   91.79   11.10
   8  -9  -1   89.89   13.60
  -8  -9  -1   96.19   12.90
   8   9  -1   98.89   10.70
   8  -9   1  116.39   11.40
   8  -9   1   86.29   12.80
   8  -9   1  105.39   10.90
   8   9  -1  105.39   10.50
   8  -9  -2  412.26   32.30
   8  -9  -2  463.85   28.90
  -8  -9   2  457.35   30.00
   8  -9  -2  386.66   29.00
   8   9   2  431.26   29.20
  -8   9  -2  439.36   29.90
   8  -9  -2  439.76   29.20
  -8  -9  -2  392.16   32.00
  -8  -9  -2  404.26   29.20
   8   9  -2  435.66   29.10
   8   9  -2  422.46   29.30
   8  -9   2  443.56   29.40
  -8   9   2  467.45   27.90
   8  -9   2  455.25   29.60
   8  -9   2  449.86   33.50
   8  -9   2  439.56   34.30
   8  -9  -3    7.40    5.30
   8   9   3    8.60    4.90
  -8  -9   3   16.10    4.40
  -8   9  -3   10.80    6.10
   8  -9  -3   10.80    5.10
   8  -9  -3   10.90    4.40
   8  -9  -3   11.90    7.90
  -8  -9  -3   10.20    7.90
  -8   9   3   11.30    5.40
   8  -9   3   12.60    6.50
   8   9  -3    8.80    5.00
   8  -9   3   17.50    5.30
   8  -9   3   18.90    8.90
  -8  -9  -3   11.90    5.20
   8  -9   3   22.10    6.20
   8   9  -3   16.90    4.70
   8  -9  -4  135.79   12.00
  -8   9  -4  121.39   14.10
   8  -9  -4  125.19   11.50
   8   9   4  116.29   11.00
  -8  -9  -4   91.49   14.40
   8  -9   4  133.59   12.50
   8  -9   4  117.29   16.90
   8   9  -4  115.89   12.00
  -8  -9  -4  123.19   12.80
   8   9  -4  113.39   11.40
   8   9  -4  126.39   10.40
   8  -9  -5  106.69   10.50
  -8   9  -5  110.69   11.20
   8   9   5   90.79    8.70
   8  -9  -5   84.19    9.00
  -8   9  -5   84.69   12.40
   8   9  -5   74.69    9.10
   8  -9   5  116.59   11.20
  -8  -9  -5   84.69   11.90
   8   9  -5   85.59   10.80
  -8   9  -6   12.30    5.90
   8  -9  -6   23.70    5.70
  -8   9  -6   19.20    4.80
   8  -9   6   31.50    5.90
  -8  -9  -6   26.80    7.30
   8   9  -6   16.90    4.30
   8   9  -6   23.80    5.50
   8  -9   6   33.20    6.60
   8  -9  -7  124.79   10.60
  -8   9  -7  104.99   11.10
  -8  -9  -7  110.99   11.90
   8   9  -7  101.49   10.40
   8  -9   7  122.99   12.20
   8  -9  -8   65.49    7.20
  -8   9  -8   57.39    7.00
  -8  -9  -8   50.79    7.20
   8  -9   8   68.79    7.50
   8  -9   8   66.19    8.30
   8   9  -8   55.99    8.80
  -8 -10   0  899.11   57.99
   8 -10   0  861.21   60.49
   8 -10   0  857.11   59.19
   8 -10  -1 1020.60   76.99
  -8 -10   1 1268.17   74.49
   8 -10   1 1176.58   76.49
   8 -10   1 1136.99   77.39
  -8 -10  -1 1138.69   75.19
  -8 -10  -1 1164.48   72.39
  -8 -10   2  460.95   34.20
   8  10   2  487.45   31.70
   8 -10  -2  489.15   31.40
   8 -10  -2  499.05   31.80
   8 -10  -2  422.56   31.40
  -8  10  -2  464.45   32.50
   8 -10  -2  457.25   42.30
   8 -10   2  510.55   32.20
   8 -10   2  528.35   32.10
   8  10  -2  458.45   31.80
  -8 -10  -2  436.26   34.70
  -8 -10  -2  475.25   31.90
   8 -10   2  466.45   36.60
   8 -10  -3  233.38   17.40
  -8 -10   3  203.48   17.50
   8 -10  -3  211.48   21.20
   8 -10  -3  256.57   16.70
   8  10   3  219.28   17.10
   8 -10  -3  243.28   17.60
  -8  10  -3  236.98   19.00
  -8 -10  -3  228.38   18.10
  -8 -10  -3  189.88   20.50
   8  10  -3  250.77   17.90
   8 -10   3  213.28   22.40
   8 -10   3  263.97   18.20
   8  10  -3  209.48   17.20
   8 -10  -4   27.40    5.60
   8 -10  -4   23.90    5.50
   8  10   4   21.20    4.90
  -8  10  -4   16.20    6.20
   8  10  -4   12.80    4.60
  -8  10   4   20.60    3.60
  -8 -10  -4   20.50    6.30
   8 -10   4   30.70    5.80
   8  10  -4   19.90    4.90
   8 -10   4   25.10    5.90
   8 -10  -5  415.26   27.70
   8 -10  -5  422.36   28.90
  -8  10  -5  421.46   29.80
   8  10   5  433.26   30.10
  -8  10  -5  456.25   28.40
   8 -10   5  458.35   29.40
   8 -10   5  463.25   29.20
   8  10  -5  406.16   28.40
  -8 -10  -5  436.46   29.50
   8 -10  -6  162.08   13.90
  -8  10  -6  113.39   15.00
   8 -10   6  152.88   12.20
  -8 -10  -6  115.59   12.30
   8 -10  -7  397.26   25.50
  -8  10  -7  366.26   25.50
   8 -10   7  429.76   25.90
   8 -10   7  401.56   26.00
  -8 -10  -7  387.36   25.80
  -8 -10  -7  370.06   25.10
   8 -11   0    5.40    5.60
  -8 -11   0    8.20    4.60
   8 -11   0    4.80    4.80
   8  11   0    0.00    5.40
   8  11   1    4.50    5.50
   8 -11  -1    5.70    4.60
  -8  11  -1    8.60    5.30
   8 -11  -1    2.50    5.40
   8 -11   1    5.20    4.90
   8 -11   1   11.40    5.80
   8  11  -1   -1.20    5.10
  -8 -11  -1    2.90    4.50
   8 -11  -2   28.70    6.20
  -8  11  -2   22.50    6.30
   8  11   2   22.90    5.80
   8 -11  -2   24.80    5.10
   8 -11   2   27.30    6.10
  -8 -11  -2   26.50    6.00
   8 -11   2   30.70    5.90
   8  11  -2   22.60    6.00
  -8  11  -3  542.45   37.20
   8 -11  -3  551.64   35.60
   8 -11  -3  579.74   36.60
   8  11   3  566.84   36.50
   8 -11   3  592.24   37.00
   8  11  -3  559.44   36.70
   8 -11   3  575.34   36.80
  -8 -11  -3  547.35   36.80
  -8  11  -4   66.59    9.60
   8 -11  -4   85.99    9.40
   8 -11  -4   59.59    8.20
  -8  11  -4   84.49    8.10
   8  11   4   54.69    9.00
   8  11  -4   61.99    7.70
   8 -11   4   91.29    9.70
   8 -11   4   89.79    9.70
   8  11  -4   75.29    8.50
  -8 -11  -4   70.19    9.80
   8 -11  -5   49.80    7.50
  -8  11  -5   39.60    5.90
  -8 -11  -5   45.40    6.50
   8  11  -5   47.90    6.50
   8  11  -5   41.50    5.80
   8 -11   5   61.69    8.80
  -8  11  -6    4.80    3.10
   8 -11  -6    9.30    3.50
   8 -11   6   10.80    3.60
  -8 -11  -6    3.20    3.20
   8  11  -6    3.50    2.30
  -8 -11  -6    3.60    3.90
   8 -12  -1  238.88   17.30
  -8  12  -1  208.28   17.40
   8  12   1  241.28   17.10
   8 -12  -1  222.98   16.40
   8 -12   1  218.18   16.90
  -8  12   1  225.18   17.20
   8 -12   1  245.28   17.40
   8  12  -1  233.78   17.10
  -8 -12  -1  241.88   16.90
  -8  12  -3   21.70    6.60
   8  12   3   26.90    4.50
  -8 -12  -3   24.70    5.20
   8 -12   3   32.10    4.90
   8  12  -3   25.30    5.00
   8 -12  -4  856.01   51.99
   8  12   4  855.61   51.39
   8 -12  -4  782.42   51.19
   8 -12  -5    2.90    2.80
  -8  12  -5    4.30    2.90
  -8 -12  -5    4.20    2.80
  -8 -12  -5   14.40    3.70
   8 -12   5    9.60    3.30
   8 -12   5    9.30    3.10
  -8  13   0    1.80    3.90
  -8 -13   0    3.00    2.70
   8 -13   0    2.00    3.10
   8 -13   0    2.60    3.80
  -8 -13   0    5.90    3.10
   8  13   0    4.00    3.80
  -8  13  -1   84.49    8.80
   8 -13  -1   79.09    7.60
   8 -13  -1   85.89    8.50
   8  13   1   95.19    8.40
  -8 -13   1  106.39    7.90
   8 -13   1   86.79    8.30
  -8 -13  -1   88.79    8.00
   8 -13   1   97.19    9.10
  -8 -13  -1  101.49    9.80
  -8  13   1   86.69    9.00
   8  13  -1   97.69    8.50
  -8  13  -2   80.79    8.40
   8 -13  -2   80.19    7.70
   8  13   2   83.49    7.40
  -8 -13  -2   88.49    7.90
   8 -13   2   77.89    8.00
   8  13  -2   92.09    7.90
  -8 -13  -2   80.39    7.60
   8 -13   2   83.09    8.00
  -8  13   2   87.89    8.30
   8  13   3   28.40    4.00
  -8  13  -3   23.70    3.80
   8 -13   3   34.20    5.30
  -8 -13  -3   26.90    4.20
   8  13  -3   25.60    3.70
   8 -13   3   30.90    5.10
  -8  13   3   33.00    5.40
  -8 -13  -3   30.70    4.90
  -9   0   0    3.30    3.10
   9   0   0   -0.10    2.80
  -9   0   0   -4.30    2.80
   9   0   0   -2.10    2.00
  -9   0  -1   20.90    5.40
   9   0   2 2406.56  157.18
   9   0  -2 2700.23  155.98
  -9   0   3    2.50    2.70
  -9   0  -3   -1.90    5.60
  -9   0   3    0.40    2.20
   9   0   3    0.40    3.50
   9   0   3   -2.30    4.10
   9   0   3    0.80    4.20
   9   0  -3    4.50    2.30
   9   0  -4  582.74   38.60
   9   0   4  591.74   42.00
  -9   0   4  666.13   39.80
  -9   0  -4  622.14   44.60
   9   0  -5    1.20    2.70
   9   0  -5    1.50    1.80
  -9   0  -5    0.00    6.70
   9   0   5   13.70    6.70
   9   0   5   -6.80    6.40
  -9   0   5    2.10    3.40
   9   0  -5    5.20    2.60
  -9   0   5    5.40    3.30
   9   0   5    5.80    7.80
   9   0   6  415.56   27.80
   9   0   6  361.36   31.70
   9   0   6  414.66   33.20
  -9   0  -6  414.16   29.00
  -9   0  -6  455.85   29.10
   9   0  -6  393.86   25.70
   9   0  -6  383.96   26.00
   9   0   6  406.76   28.70
  -9   0   6  421.86   27.90
   9   0  -6  452.75   25.80
   9   0  -6  402.46   27.20
   9   0   6  371.66   34.20
  -9   0  -7   -1.30    6.20
   9   0  -7   -1.70    4.90
   9   0   7    2.40    5.00
   9   0   7   -1.20    6.60
   9   0   7   -3.90    8.80
   9   0   7   10.40    8.20
  -9   0  -8  109.59   15.40
  -9   0   8  133.09   10.00
   9   0   8  125.39   19.30
   9   0   8  138.79   13.10
   9   0   8  101.89   15.00
  -9   0  -9  -14.20    7.00
   9   0   9   -3.20    5.00
  -9   0   9    4.80    3.00
  -9   0  10    3.80    2.60
   9   0  10   -2.40    3.80
  -9   0 -11   -7.10    3.80
  -9   0  11    1.90    2.10
   9  -1   0 4431.86  265.07
   9   1   0 4257.97  264.87
   9  -1  -1  587.04   36.50
   9  -1  -1  580.94   36.40
   9   1   1  576.54   36.70
  -9   1  -1  502.85   38.10
   9   1   1  526.65   36.70
   9  -1   1  594.44   37.20
   9  -1   1  528.15   37.70
   9   1  -1  639.74   36.40
  -9   1   1  644.44   36.90
   9  -1   1  581.74   37.70
   9   1   2  299.77   22.80
  -9  -1   2  338.17   21.90
   9  -1  -2  362.86   21.80
  -9  -1   2  298.57   21.70
   9   1   2  352.46   23.30
  -9   1   2  303.17   22.10
  -9  -1  -2  361.06   25.40
  -9   1   2  355.96   22.30
   9   1  -2  352.56   21.60
   9  -1   2  296.77   23.80
   9  -1   2  355.86   23.50
   9  -1   2  383.16   24.30
   9   1   3   94.99    9.80
  -9  -1   3  102.09    8.50
  -9  -1   3   98.29    8.40
   9   1   3  103.09   10.30
   9   1   3  121.49   11.50
   9  -1   3  122.49   11.80
   9  -1   3  102.09   11.40
   9  -1   3   98.59   11.70
  -9  -1  -3  128.99   13.70
  -9   1   3  119.09    9.30
  -9   1   3  104.29    9.10
   9   1  -3  123.49    7.80
  -9   1  -4   37.30    9.10
   9   1   4   46.60    7.60
   9   1   4   45.80    8.20
   9  -1  -4   35.00    6.80
  -9  -1   4   38.10    6.70
   9  -1  -4   53.49    5.10
  -9   1   4   43.10    6.20
   9  -1   4   33.30    8.30
  -9  -1  -4   46.70   10.60
  -9   1   4   43.80    6.40
   9  -1   4   48.40    8.70
   9   1  -4   39.10    3.70
   9  -1   4   41.80    8.50
   9   1   5  534.75   36.70
   9   1   5  536.05   38.70
  -9   1  -5  513.65   38.10
   9   1   5  529.65   37.20
  -9  -1   5  565.24   34.90
   9  -1   5  565.44   35.80
   9  -1   5  471.55   38.40
  -9  -1  -5  530.85   40.90
   9   1  -5  542.55   34.60
  -9   1   5  541.35   35.60
   9  -1   5  559.54   39.40
  -9  -1  -5  517.05   37.00
   9  -1   5  587.04   35.40
   9  -1   5  492.95   38.60
  -9   1  -6 2083.19  129.49
   9   1   6 2105.19  132.49
   9  -1  -6 2133.89  128.09
   9   1   6 2092.39  133.49
   9  -1   6 2044.80  134.29
   9  -1  -7 1095.59   64.79
   9   1   7 1045.60   66.19
   9   1   7 1136.39   67.39
   9  -1  -7 1119.79   68.29
   9  -1  -7  917.51   65.29
  -9   1  -7 1067.29   68.39
  -9  -1  -7 1066.29   66.99
   9   1  -7  938.11   65.89
  -9  -1  -7 1112.59   67.49
   9  -1   7 1061.79   67.79
  -9   1   7 1011.60   65.89
   9  -1   7 1046.50   73.09
   9   1   8  309.07   24.00
   9  -1  -8  333.17   19.30
  -9   1  -8  289.67   25.00
   9   1   8  291.27   21.70
   9  -1  -8  280.47   20.50
   9   1   8  275.07   28.40
  -9  -1   8  312.37   21.80
   9  -1   8  262.47   29.60
  -9  -1  -8  317.67   24.20
   9  -1   8  287.37   22.40
   9  -1   8  311.37   24.70
  -9   1   8  308.17   20.30
   9   1   9  412.66   28.40
  -9  -1   9  458.35   27.60
  -9   1  -9  403.16   31.50
  -9  -1  -9  418.16   39.20
  -9  -1  -9  469.65   31.20
   9  -1   9  424.56   31.80
   9  -1   9  392.46   29.30
  -9  -1  10  156.88   10.40
   9   1  10  148.29   12.50
   9  -1  10  114.69   12.20
  -9   1  10  140.69   10.50
  -9   1 -11   29.60    4.60
  -9  -1  11   38.60    3.70
  -9  -1 -11   24.00    5.60
  -9   1  11   41.40    4.20
   9  -2   0    2.00    3.20
   9  -2   0    4.40    3.00
  -9   2   0   -1.80    3.40
   9   2   0    0.80    2.50
  -9   2   0    4.00    3.30
  -9  -2   0    2.70    3.10
   9   2   1 1472.15   87.89
   9  -2  -1 1441.36   87.59
  -9  -2   1 1299.27   87.69
   9   2  -1 1359.86   87.09
   9  -2   1 1588.94   88.59
   9  -2   1 1371.46   89.49
   9   2   2 1236.58   83.49
  -9   2  -2 1173.08   85.79
   9  -2   2 1396.46   84.79
   9   2  -2 1438.06   82.39
   9  -2   2 1489.45   85.99
  -9  -2   3   48.70    4.90
   9   2   3   51.29    7.20
   9   2   3   42.20    6.60
  -9   2  -3   34.70    8.50
   9  -2  -3   52.59    5.40
  -9  -2  -3   45.90    9.00
   9  -2   3   55.99    9.10
  -9   2   3   41.90    6.20
   9  -2   3   54.29    8.90
  -9   2   3   50.99    6.40
   9  -2   3   45.50    7.90
   9   2   4  189.28   18.40
   9  -2  -4  200.38   13.00
  -9   2  -4  155.28   17.30
   9   2   4  181.98   15.30
  -9   2   4  199.58   14.50
  -9  -2  -4  157.18   18.20
   9  -2   4  174.58   17.20
  -9  -2   5  612.04   35.60
  -9   2  -5  559.64   36.70
   9   2   5  567.94   36.10
   9   2   5  529.95   37.40
   9  -2  -5  578.04   35.00
   9   2   5  584.54   39.50
   9   2   5  568.24   37.20
   9  -2  -5  554.94   34.70
  -9   2   5  556.44   36.60
   9  -2   5  532.65   40.20
   9  -2   5  538.75   36.60
   9   2  -5  508.65   35.20
   9  -2   5  506.15   35.90
  -9   2   5  562.84   36.40
   9  -2   5  554.04   40.40
  -9  -2  -5  511.05   37.30
  -9  -2  -5  558.04   41.90
  -9   2  -6  450.25   27.40
  -9   2  -6  445.76   30.90
   9   2   6  403.66   32.30
   9   2   6  420.16   28.70
   9   2   6  417.36   31.40
   9  -2  -6  410.56   26.50
   9  -2  -6  439.56   26.90
   9   2   6  422.06   27.30
  -9  -2   6  425.36   27.50
   9  -2   6  404.86   29.30
   9   2  -6  391.26   27.80
  -9  -2  -6  395.86   30.00
  -9   2   6  398.06   26.50
  -9   2   6  422.96   29.10
   9  -2   6  392.56   33.20
   9  -2   6  390.76   33.80
  -9  -2  -6  417.56   28.30
   9  -2   6  374.16   28.30
  -9   2  -7  194.08   20.20
  -9  -2   7  228.38   16.20
   9  -2  -7  239.18   15.40
   9   2   7  176.78   21.80
   9   2   7  211.38   16.20
   9  -2  -7  236.08   14.90
   9  -2   7  169.58   23.90
   9  -2   7  210.38   19.70
  -9   2   7  199.98   14.90
   9  -2   7  211.78   17.90
  -9  -2  -7  182.18   18.90
  -9  -2  -7  232.28   17.90
  -9  -2   8   54.29    7.40
   9   2   8   41.20    6.00
  -9   2  -8   26.90    9.70
   9  -2  -8   55.59    7.40
   9  -2  -8   38.00    5.80
   9   2   8   46.80   12.90
   9  -2  -8   53.69    6.10
  -9   2   8   44.10    7.60
  -9  -2  -8   46.60    8.40
  -9   2   8   49.50    6.60
   9  -2   8   27.70   16.20
   9  -2   8   38.00    7.80
   9  -2   8   46.00   13.00
  -9  -2  -8   37.40    6.40
   9  -2   8   52.49   10.70
   9   2   9    9.00    3.70
  -9   2  -9   -6.20    7.50
   9  -2  -9    8.00    2.20
  -9  -2  -9   -3.10    6.60
   9  -2   9    3.50    6.00
   9  -2   9   -6.40    8.20
  -9   2 -10  121.19   13.30
  -9   2  10  153.68   12.30
   9  -2  10  131.79   16.20
   9  -2  10  141.89   12.70
  -9  -2 -10  151.08   14.80
  -9   2 -11   31.40    4.50
  -9  -2 -11   18.90    5.30
  -9   2  11   24.30    3.60
   9  -2  11   21.60    3.80
   9   3   0 2099.39  128.19
   9  -3   0 2137.69  128.79
   9  -3   0 2047.70  130.39
  -9   3  -1  930.01   53.89
   9   3   1  811.52   51.79
   9  -3  -1  778.02   53.29
   9  -3  -1  842.22   51.79
   9  -3   1  800.92   53.99
   9  -3   1  858.11   52.79
   9  -3   1  860.21   53.49
   9   3  -1  766.32   50.99
  -9  -3  -1  831.82   53.19
   9  -3  -2 1885.91  116.49
   9   3   2 1759.32  116.89
  -9   3  -2 2028.60  119.79
   9  -3   2 1934.41  118.39
  -9  -3   3  283.27   18.60
   9  -3  -3  311.07   19.40
  -9   3  -3  265.07   22.90
   9   3   3  280.77   20.20
   9  -3  -3  302.47   19.70
   9   3   3  282.87   20.40
  -9   3   3  302.57   20.20
  -9  -3  -3  297.77   22.90
   9  -3   3  281.77   23.10
   9  -3   3  295.27   22.30
  -9   3   3  292.27   20.20
   9  -3   3  256.67   22.40
   9   3   4  148.69   12.60
   9  -3  -4  141.59   10.40
   9   3   4  143.49   13.70
   9  -3   4  138.99   11.70
   9  -3   4  149.09   18.50
   9  -3   4  142.79   15.70
  -9   3   4  153.58   12.50
   9  -3   4  130.39   11.70
  -9  -3  -4  136.59   16.00
  -9  -3  -4  138.19   12.70
   9  -3   4  150.58   15.50
  -9   3   4  144.69   14.20
  -9   3  -5  131.59   10.50
  -9   3  -5  123.39   13.90
  -9  -3   5  133.69    9.40
   9   3   5   96.09   12.60
   9   3   5  112.29   13.90
   9  -3  -5  137.09    9.90
   9  -3  -5  130.59    9.50
   9  -3   5  106.99   15.30
   9  -3   5   98.89   11.50
  -9   3   5  121.69   11.70
  -9   3   5  107.09   11.30
  -9  -3  -5   99.79   17.10
   9  -3   5  108.29   15.30
  -9   3   5  106.89    9.00
   9  -3   5  112.39   11.30
   9   3  -5  106.79   10.00
  -9  -3  -5  114.09   13.00
   9   3   6 1205.68   80.99
   9  -3  -6 1332.47   78.19
  -9   3  -6 1342.57   81.59
   9   3   6 1190.68   77.59
  -9   3   6 1389.16   80.29
  -9  -3  -6 1306.97   79.29
   9   3  -6 1161.38   77.99
  -9   3   6 1270.97   79.79
   9  -3   6 1432.56   86.09
  -9   3   6 1150.58   77.69
   9   3  -6 1241.88   78.99
   9  -3   6 1165.78   84.39
  -9  -3  -6 1127.79   85.29
  -9  -3  -6 1355.36   80.69
   9  -3  -7  199.28   14.00
   9   3   7  169.28   20.30
  -9   3  -7  166.18   19.90
  -9  -3   7  213.28   14.50
   9   3   7  197.08   13.70
   9   3   7  194.58   20.20
  -9   3   7  203.28   17.10
   9  -3   7  145.79   21.30
   9  -3   7  188.68   18.50
   9  -3   7  215.18   17.00
  -9   3   7  187.58   16.50
   9   3  -7  207.18   16.10
  -9  -3  -7  183.98   16.20
  -9  -3  -7  164.08   18.50
  -9   3   7  168.98   13.70
   9  -3   7  197.08   24.10
  -9   3  -8  954.70   63.59
   9   3   8  900.61   59.49
   9  -3  -8 1023.60   60.19
   9   3   8 1070.79   66.19
  -9  -3  -8 1052.59   62.09
   9  -3   8  900.21   70.49
  -9  -3  -8 1004.70   65.39
  -9   3   8 1067.39   64.09
  -9  -3  -8  875.91   61.29
  -9   3   8  856.61   65.99
   9  -3   8  972.70   63.69
   9  -3   8  930.41   61.99
   9  -3   8  879.71   79.09
   9  -3  -9   96.49    7.60
  -9   3  -9   64.69   10.00
   9  -3   9   68.99   11.80
  -9  -3  -9   78.29   12.20
  -9   3   9   90.99    8.20
   9  -3   9   81.29   11.60
  -9  -3 -10  218.18   17.80
  -9   3  10  211.48   14.50
   9  -4   0    3.30    4.20
  -9   4   0    4.30    3.60
   9   4   0    3.30    2.10
  -9  -4   0    0.10    2.90
   9  -4   0    3.30    3.40
  -9   4   0   -4.60    3.60
   9  -4   0    2.20    4.10
  -9   4  -1   12.90    4.70
   9  -4  -1   15.00    4.80
   9  -4  -1   14.00    4.70
   9  -4  -1   12.90    3.60
  -9  -4   1    9.10    2.90
   9   4   1   17.00    3.40
   9  -4   1   13.90    5.00
   9  -4   1   10.80    5.10
  -9   4   1   12.70    4.10
  -9  -4  -1   24.70    4.90
   9  -4   1    6.50    4.70
  -9   4   1   16.90    4.20
   9  -4  -2  686.13   46.10
   9   4   2  691.43   46.40
   9  -4  -2  753.32   47.40
   9  -4   2  725.43   49.20
   9  -4   2  795.92   48.60
   9  -4   2  708.53   48.30
  -9  -4  -2  798.22   48.60
   9   4   3  105.59    8.30
   9  -4  -3   95.59    8.40
  -9  -4   3   86.29    6.50
   9   4   3   79.09    9.20
  -9  -4  -3   84.59   11.50
  -9   4   3   99.79    9.20
   9  -4   3   80.89    8.40
   9  -4   3   96.69   17.00
   9  -4   3   77.99   12.50
  -9   4   3  100.29    9.30
   9  -4   3   77.89    8.30
   9  -4   3   85.69   11.70
  -9   4  -4   67.99    7.60
   9   4   4   61.19    8.40
   9  -4  -4   69.09    7.50
   9  -4  -4   60.59    6.80
  -9  -4   4   71.09    5.50
   9   4   4   70.79    8.50
   9  -4  -4   72.69    7.90
   9  -4   4   62.59    8.20
   9   4  -4   62.89    6.90
   9  -4   4   57.19   13.10
  -9   4   4   73.29    8.90
  -9   4   4   72.79    9.00
  -9  -4  -4   75.69   12.20
   9  -4   4   53.79    8.10
   9  -4   4   76.99   11.40
  -9  -4  -4   81.79   13.10
  -9   4  -5   17.00    5.90
   9  -4  -5    7.10    3.50
   9  -4  -5    4.10    4.20
  -9   4  -5    2.80    7.20
   9   4   5    2.50    6.20
   9   4  -5    7.50    3.10
  -9   4   5    8.90    3.20
   9  -4   5   11.90    8.20
  -9  -4  -5    5.10    6.60
  -9   4   5    6.80    5.20
   9  -4   5   11.30    5.50
   9   4  -5    7.10    3.70
  -9  -4  -5    7.10    8.80
   9  -4   5   10.70    4.70
  -9   4   5    4.70    5.00
   9  -4   5    9.90    7.70
   9  -4  -6   19.40    4.30
   9   4   6   12.00   12.20
   9  -4  -6   22.70    5.50
  -9  -4   6   20.70    3.60
  -9   4  -6   10.00    8.30
   9   4   6    9.30    3.90
  -9   4  -6   26.00    5.30
  -9   4   6   24.20    6.50
   9   4  -6   16.10    4.90
   9  -4   6   25.60    6.20
   9   4  -6   27.80    3.90
  -9  -4  -6   10.80    9.70
   9  -4   6   17.20   12.40
  -9   4   6   15.20    3.80
   9  -4   6   21.30    7.30
   9  -4   6   12.20    9.50
  -9   4   6    9.90    5.80
   9   4   7   13.30    8.60
   9  -4  -7   31.90    6.60
  -9   4  -7    6.90    8.70
  -9   4  -7   21.80    5.30
   9  -4  -7   14.30    4.40
  -9  -4  -7   11.30    8.60
   9  -4   7   16.80    6.50
   9  -4   7   10.60   10.70
   9   4  -7   22.30    5.90
  -9   4   7   24.50    6.00
  -9   4   7   17.30    6.40
   9  -4   7   23.90   11.10
  -9  -4  -7   19.80    6.00
  -9   4   7   11.30    3.90
   9  -4   7   29.60    9.10
  -9   4  -8   19.20    4.90
   9  -4  -8   25.50    4.70
   9  -4  -8   18.30    5.60
  -9   4   8   22.30    6.60
  -9  -4  -8    7.30    5.90
   9  -4   8   12.70    9.20
  -9   4   8   20.00    4.30
   9  -4   8   20.80    6.60
  -9  -4  -8    5.20    7.50
   9  -4  -9    7.20    3.60
   9  -4  -9   16.30    3.80
  -9   4  -9    9.20    6.10
   9  -4   9   11.50    5.80
  -9  -4  -9   12.50    6.40
   9  -4   9   14.80    8.70
  -9   4   9   13.60    3.70
  -9   4 -10   72.39    6.70
   9  -4  10   62.39    8.80
   9  -4  10   63.69    9.80
  -9  -4 -10   52.79    7.50
  -9   4  10   65.79    6.00
  -9   5   0  178.48   15.90
   9  -5   0  178.58   15.90
  -9   5   0  193.58   14.40
   9  -5   0  183.28   15.60
   9  -5   0  174.78   13.60
  -9  -5   0  170.98   13.70
   9  -5  -1 3642.74  234.98
   9  -5   1 4051.99  235.98
   9   5   2 1324.97   80.89
   9  -5  -2 1258.47   80.19
   9  -5   2 1296.57   83.49
   9  -5   2 1360.36   82.29
   9  -5   2 1223.38   82.29
   9   5   3 1790.62  105.89
   9  -5  -3 1756.92  104.59
  -9   5  -3 1869.41  105.09
   9  -5  -3 1749.43  105.29
   9   5  -3 1547.15  104.89
   9  -5   3 1620.14  108.79
  -9  -5  -3 1610.54  105.49
  -9  -5  -3 1674.13  107.99
   9   5   4  911.91   56.09
   9  -5  -4  978.50   58.79
  -9  -5   4  799.92   53.49
  -9  -5   4  910.91   54.79
   9  -5  -4  936.81   56.09
   9  -5  -4  815.12   54.59
   9  -5   4  933.11   59.39
   9  -5   4  825.52   59.39
  -9   5   4  914.71   56.09
   9  -5   4  872.51   55.49
   9  -5   4  861.81   55.19
   9   5  -4  777.12   54.69
  -9  -5  -4  879.81   59.19
   9   5  -4  825.02   55.19
  -9  -5  -4  891.91   55.89
  -9   5   4  887.61   56.09
   9  -5  -5  310.07   21.50
   9   5   5  275.87   20.90
   9  -5  -5  303.37   20.80
   9   5   5  352.76   22.60
  -9  -5   5  311.97   19.30
  -9   5  -5  276.17   23.90
  -9   5   5  325.87   22.90
  -9  -5  -5  324.97   23.40
   9  -5   5  364.56   28.20
   9  -5   5  309.77   22.10
   9  -5   5  354.76   28.20
   9   5  -5  293.67   21.60
   9   5  -5  280.17   21.40
  -9   5   5  307.97   22.80
  -9  -5  -5  265.87   26.60
   9  -5   5  330.87   22.70
   9   5  -5  287.57   20.70
  -9   5   5  305.37   20.40
   9  -5  -6  678.63   41.80
   9   5   6  579.94   41.70
   9  -5  -6  630.14   42.20
   9   5   6  743.43   44.30
   9  -5   6  735.63   50.39
   9   5  -6  597.24   41.40
   9   5  -6  631.84   42.80
  -9  -5  -6  577.34   48.60
   9  -5   6  623.64   49.00
  -9   5   6  674.13   43.70
  -9  -5  -6  682.13   44.50
   9  -5   6  711.93   44.00
  -9   5   6  661.73   43.80
   9  -5   6  676.13   43.10
   9   5   7  664.03   48.90
  -9  -5   7  732.13   42.20
   9  -5  -7  676.33   43.10
   9  -5  -7  636.54   43.60
   9  -5   7  723.43   45.10
   9  -5   7  769.42   46.50
  -9   5   7  706.33   49.50
  -9  -5  -7  642.84   45.80
   9  -5   7  650.13   51.49
   9  -5   7  680.83   58.99
  -9  -5  -7  636.34   44.00
   9   5  -7  635.14   44.30
  -9   5   7  655.43   45.20
  -9   5  -8  428.06   32.90
   9  -5  -8  528.65   34.40
   9  -5  -8  474.95   31.00
  -9  -5  -8  497.75   32.50
   9  -5   8  492.45   33.10
  -9  -5  -8  428.56   33.40
   9   5  -8  446.16   32.30
   9  -5   8  549.25   35.40
  -9   5  -9  504.95   31.80
   9  -5  -9  431.56   31.30
   9  -5  -9  500.05   31.00
   9  -5   9  512.85   35.00
   9  -5   9  490.25   33.10
   9  -5  10  385.26   24.30
   9  -5  10  351.96   25.70
  -9   5  10  346.07   22.70
   9  -6   0   10.30    4.90
   9  -6   0    6.60    5.50
  -9   6   0    3.90    2.40
  -9  -6   0   -0.10    3.60
   9   6   0    8.40    6.20
  -9   6   0   -2.70    2.50
   9  -6   0    2.40    5.60
  -9  -6   1   57.39    6.90
   9  -6  -1   70.89   10.10
  -9   6  -1   58.29    6.70
   9  -6  -1   59.49    7.10
   9  -6  -1   52.09    8.30
   9  -6  -1   54.09    7.40
   9   6   1   53.09    7.10
   9   6   1   59.39    7.50
   9  -6   1   63.19    9.20
  -9   6   1   57.39    8.50
   9   6  -1   57.09    7.70
   9   6  -1   51.29    6.70
  -9   6   1   75.69    8.20
  -9  -6  -1   58.99    8.50
   9  -6   1   55.59    7.40
   9  -6   1   60.79    7.40
   9  -6   1   52.89    8.30
   9  -6   1   59.99    9.80
   9  -6  -2  150.48   11.70
  -9   6  -2  140.69   12.40
   9   6   2  154.18   12.60
   9  -6  -2  138.09   11.50
  -9   6  -2  162.38   11.60
   9  -6  -2  162.48   14.50
   9  -6  -2  132.79   11.60
  -9  -6   2  151.38   11.30
   9   6   2  134.99   11.70
   9  -6  -2  144.19   12.60
   9  -6   2  151.18   12.10
   9  -6   2  160.98   15.40
  -9   6   2  165.28   11.00
  -9  -6  -2  160.38   14.50
   9   6  -2  135.19   11.60
  -9   6   2  151.88   12.70
   9   6  -2  140.79   12.10
  -9   6   2  168.28   13.10
   9   6   3  338.27   24.10
   9  -6  -3  382.56   26.10
   9  -6  -3  349.87   23.50
   9  -6  -3  342.67   23.80
  -9  -6   3  373.16   23.00
   9  -6  -3  357.66   24.60
   9   6   3  388.16   25.00
  -9   6   3  359.96   23.10
   9  -6   3  352.66   27.60
   9   6  -3  328.47   23.70
   9  -6   3  324.77   28.10
   9  -6   3  354.06   24.40
   9  -6   3  375.56   24.30
  -9  -6  -3  380.56   27.70
  -9   6   3  367.56   25.00
   9   6  -3  338.77   24.00
  -9  -6  -3  352.16   24.60
  -9   6   3  367.16   25.00
   9  -6  -4   88.29    9.40
   9   6   4   73.59    8.90
   9   6   4   92.59   10.90
   9  -6  -4   92.29    9.00
   9  -6  -4   82.69   11.30
   9  -6  -4   84.29    8.10
   9   6  -4   99.19    9.00
   9  -6   4  109.69   14.40
  -9  -6  -4   82.89   12.70
  -9  -6  -4   88.99   11.00
   9  -6   4   99.99   10.50
   9   6  -4   99.69    9.20
  -9   6   4   83.09   10.40
  -9   6   4   97.69    8.20
  -9   6   4   96.59   10.70
   9   6  -4   78.69    8.70
   9  -6   4  106.39   14.70
   9  -6  -5  306.77   21.30
   9   6   5  276.57   21.60
   9  -6  -5  304.17   22.00
  -9   6  -5  315.57   24.30
   9  -6  -5  298.97   21.50
  -9  -6  -5  309.97   23.30
  -9   6   5  310.47   22.80
   9  -6   5  342.37   22.70
   9  -6   5  292.97   22.00
  -9   6   5  311.17   20.50
   9  -6   5  337.77   28.30
  -9   6   5  292.87   22.60
   9  -6   5  325.47   28.60
  -9  -6  -5  275.57   26.50
  -9   6  -6   93.09   11.60
   9  -6  -6   79.99   10.20
  -9   6  -6   91.19   13.90
   9   6   6   66.39    8.40
   9  -6  -6   81.89    9.70
   9  -6   6   85.59   15.70
   9  -6   6   99.39   11.30
   9   6  -6   90.19    7.70
  -9   6   6   67.49    9.40
   9   6  -6   88.39   10.60
  -9   6   6   73.89   10.10
  -9   6   6   83.99    8.60
   9  -6   6   99.89   12.10
   9  -6   6   95.69   15.60
  -9  -6  -6   60.29   13.40
  -9  -6  -6   62.99   10.30
  -9   6  -7   29.20    8.00
   9  -6  -7   21.50    5.30
  -9   6  -7   30.50    6.50
   9  -6  -7    9.80    6.10
   9  -6   7   34.70    7.00
   9  -6   7   36.60   11.60
  -9  -6  -7   19.40    9.20
  -9   6   7   22.90    4.30
  -9  -6  -7   28.40    5.80
   9   6  -7   24.60    6.00
   9  -6   7   38.80    8.60
  -9   6  -8   51.19    7.20
   9  -6  -8   52.09    7.80
  -9   6  -8   59.19    8.40
  -9  -6  -8   45.30    7.20
   9  -6   8   58.69    9.50
   9   6  -8   50.79    8.80
  -9   6   8   44.20    6.50
  -9  -6  -8   35.00    8.80
   9  -6  -9    7.90    3.80
   9  -6  -9   13.10    4.80
  -9   6  -9   16.70    3.10
   9  -6   9   16.50    7.90
   9  -6   9   19.90    7.10
  -9   6   9   13.80    3.70
  -9  -6  -9   17.90    5.40
   9  -6  10    8.30    4.60
  -9  -6 -10   16.30    3.90
  -9   6  10   12.70    2.10
   9  -6  10   13.50    3.50
   9  -7   0 1627.24  102.29
   9  -7   0 1734.93  103.79
   9  -7   0 1535.25  105.09
   9   7   1  474.95   32.20
  -9   7  -1  521.15   31.40
   9  -7  -1  499.35   32.00
   9  -7  -1  485.55   33.10
   9  -7  -1  462.55   34.50
   9  -7  -1  510.65   35.70
   9  -7  -1  480.85   31.70
  -9  -7   1  511.65   32.90
   9   7   1  500.25   32.60
   9   7  -1  471.95   32.10
   9  -7   1  472.65   35.00
   9  -7   1  491.75   36.10
   9   7  -1  472.55   32.20
  -9  -7  -1  477.35   34.00
   9  -7   1  495.75   32.30
   9  -7   1  480.05   32.00
  -9   7   1  545.15   33.30
   9  -7  -2  698.63   47.40
   9  -7  -2  675.53   44.50
   9  -7  -2  703.83   45.80
   9   7   2  702.33   45.60
  -9  -7   2  765.92   45.40
   9  -7  -2  659.53   44.90
   9  -7  -2  709.13   44.90
   9   7   2  726.73   45.30
  -9   7  -2  726.73   45.80
   9  -7   2  720.33   45.30
   9   7  -2  676.43   45.10
  -9   7   2  737.73   46.10
   9  -7   2  746.03   48.60
   9  -7   2  711.03   49.50
   9   7  -2  719.03   45.30
  -9  -7  -2  753.62   48.10
   9  -7   2  668.73   45.00
  -9  -7  -2  659.63   45.30
   9   7   3  819.12   52.09
  -9  -7   3  828.62   50.89
   9  -7  -3  857.91   50.99
   9  -7  -3  854.21   53.59
   9  -7  -3  777.12   51.09
   9   7   3  760.22   51.29
  -9   7  -3  873.71   52.59
   9  -7  -3  790.92   50.39
   9  -7  -3  809.92   52.19
  -9   7   3  845.82   52.29
   9  -7   3  802.42   51.39
   9  -7   3  826.32   56.29
   9  -7   3  826.72   51.69
   9   7  -3  758.42   51.19
  -9  -7  -3  741.73   51.59
   9   7  -3  795.42   51.29
   9  -7   3  831.72   55.29
  -9  -7  -3  790.42   54.69
   9   7   4  310.37   23.10
   9  -7  -4  345.47   25.50
   9  -7  -4  321.37   22.40
   9  -7  -4  355.16   23.30
   9  -7  -4  340.47   24.10
  -9   7   4  351.86   22.10
  -9  -7  -4  345.17   24.40
   9  -7   4  326.07   28.70
   9   7  -4  341.97   23.90
   9   7  -4  347.97   23.00
   9  -7   4  339.67   24.00
  -9   7   4  347.77   24.30
   9  -7   4  332.87   23.70
  -9   7   4  298.27   24.10
   9  -7   4  355.46   28.30
   9   7   5  701.63   46.10
   9  -7  -5  718.43   46.10
   9  -7  -5  694.83   47.40
  -9   7  -5  807.82   48.20
   9  -7   5  751.52   52.89
   9   7  -5  654.83   46.60
   9   7  -5  699.23   45.80
   9  -7   5  782.32   46.90
  -9  -7  -5  748.53   47.60
   9   7  -5  638.24   46.00
   9  -7   5  774.12   47.20
  -9   7   5  741.23   47.50
   9   7   6  207.58   15.80
  -9   7  -6  236.28   18.80
   9  -7  -6  214.78   16.80
  -9   7  -6  256.07   18.80
   9  -7  -6  187.88   17.40
  -9  -7  -6  232.78   19.30
   9  -7   6  255.57   18.30
  -9   7   6  223.18   15.40
   9  -7   6  223.18   23.60
  -9   7   6  218.18   18.00
   9   7  -6  196.48   17.30
   9  -7  -7  476.05   31.30
  -9   7  -7  444.26   32.00
   9  -7  -7  450.55   32.90
  -9  -7  -7  507.15   33.50
   9  -7   7  520.95   33.60
   9  -7   7  496.15   32.50
  -9   7   7  448.86   30.10
  -9   7  -8   63.19    8.20
   9  -7  -8   58.09    8.50
  -9   7  -8   67.19    7.80
  -9   7   8   66.29    6.50
   9   7  -8   56.99    9.80
   9  -7   8   90.79   11.90
  -9  -7  -8   77.99    9.50
  -9  -7  -8   76.49    9.50
   9  -7   8   81.09   10.00
   9  -7  -9  389.16   25.00
   9  -7  -9  349.17   25.00
   9  -7   9  399.96   26.70
   9  -7   9  383.66   25.80
  -9   7   9  382.66   24.30
  -9  -7  -9  446.26   28.50
  -9  -8   0   -6.10    4.70
   9  -8   0    3.70    7.00
   9  -8   0    4.90    7.10
  -9   8   0    1.40    3.50
   9  -8  -1  169.48   14.20
   9   8   1  183.18   14.70
   9  -8  -1  183.68   18.60
   9  -8  -1  197.38   14.70
   9  -8  -1  180.68   16.10
   9   8   1  181.38   16.30
   9  -8  -1  164.98   18.20
  -9  -8   1  174.08   15.20
   9  -8   1  170.08   18.80
   9   8  -1  170.68   14.80
   9  -8   1  160.18   14.80
  -9  -8  -1  198.78   17.10
   9   8  -1  201.88   18.10
  -9   8   1  203.18   13.50
   9  -8   1  184.28   15.40
   9  -8   1  178.48   18.30
   9  -8  -2    7.70    7.20
   9  -8  -2    1.40    3.90
   9  -8  -2   13.80    5.20
   9   8   2    1.60    4.90
  -9   8  -2    4.60    5.40
  -9  -8   2   12.80    4.50
   9  -8  -2    1.50   12.50
   9  -8  -2    4.80    6.80
   9   8  -2    2.60    5.00
   9  -8   2    5.20   10.10
   9   8  -2    8.40    4.90
   9  -8   2   10.60    8.20
   9  -8   2    6.10    5.20
  -9   8   2    5.90    5.50
  -9  -8  -2    3.10    7.00
   9  -8   2    9.30    4.60
  -9  -8  -2    8.50    4.70
   9  -8  -3    6.00    4.80
   9  -8  -3   -4.00    6.70
  -9  -8   3   12.70    4.00
   9  -8  -3    8.80    6.90
   9   8   3    8.70    4.70
   9  -8  -3    7.70    3.60
   9  -8  -3   12.30    5.00
  -9   8  -3    7.60    5.50
   9  -8   3   11.90    5.60
  -9  -8  -3    7.80    7.90
   9   8  -3    8.00    5.00
   9  -8   3   14.70    8.70
   9  -8   3   11.00    7.30
  -9   8   3    9.70    3.30
  -9   8   3    4.80    5.60
   9  -8   3   14.50    5.10
   9   8  -3   15.40    4.50
  -9  -8  -3    8.40    5.30
   9  -8  -4    5.10    4.60
  -9   8  -4    3.50    5.80
   9   8   4   -0.40    4.20
   9  -8  -4    2.30    4.60
   9  -8  -4    2.30    6.60
   9  -8   4    9.20    7.40
  -9  -8  -4    2.30    5.90
   9   8  -4    8.00    4.00
  -9   8   4    7.20    5.60
   9   8  -4    6.60    4.00
   9  -8   4   17.20    8.90
  -9  -8  -4    1.00    7.40
  -9   8   4    4.20    3.40
   9   8  -4   -0.10    4.20
   9  -8   4   14.10    5.60
   9  -8   4   14.90    5.20
  -9   8  -5   47.90    8.20
   9  -8  -5   38.10    8.00
   9  -8  -5   44.10    6.60
  -9   8  -5   54.39    8.00
   9   8   5   44.20    6.10
   9  -8   5   37.00   13.80
   9   8  -5   47.50    6.70
  -9   8   5   46.20    6.40
   9  -8   5   47.20   10.50
   9   8  -5   38.30    6.30
  -9  -8  -5   49.20    8.40
  -9  -8  -5   69.79   18.70
   9   8  -5   36.80    5.90
  -9   8   5   45.80    8.20
  -9   8  -6   94.39   10.80
   9   8   6   94.09   11.00
   9  -8  -6   73.69   10.90
  -9   8  -6   92.69   11.30
   9  -8  -6   94.09   10.50
  -9  -8  -6   82.39   12.60
   9   8  -6   71.69    9.60
  -9   8   6   95.09    8.00
  -9   8  -7  165.28   15.00
   9  -8  -7  173.38   14.00
  -9   8  -7  184.68   13.80
  -9  -8  -7  152.68   15.90
  -9   8   7  176.98   12.20
   9  -8   7  204.68   15.20
   9   8  -7  155.18   15.90
   9  -8   7  201.08   16.00
  -9   8  -8  420.86   29.60
   9  -8  -8  455.25   29.80
   9  -8   8  449.95   30.40
  -9  -8  -8  467.15   30.50
  -9  -8  -8  498.35   30.20
   9  -8   8  479.35   31.10
  -9   8   8  467.95   28.60
   9  -8  -9    3.10    2.60
   9  -8   9    2.50    3.50
  -9  -8  -9    5.30    3.10
   9  -8   9    5.40    2.90
   9   9   0  581.14   36.60
   9  -9   0  581.44   36.50
   9  -9   0  507.75   39.60
   9   9   0  595.54   36.80
   9  -9   0  470.65   40.20
   9  -9   0  530.75   35.90
  -9  -9   0  579.24   38.50
   9   9   1  122.39   12.20
  -9   9  -1  130.19   11.80
   9  -9  -1  103.19   11.40
   9  -9  -1  124.39   12.20
   9  -9  -1  121.69   15.90
  -9  -9   1  137.79   13.00
   9  -9  -1  128.69   11.70
  -9  -9  -1  117.69   14.20
   9   9  -1  136.09   12.30
   9  -9   1  117.09   16.30
  -9  -9  -1  127.69   11.50
   9  -9   1  135.39   12.60
   9  -9   1  111.09   16.10
   9   9  -1  112.29   11.80
  -9   9   1  109.29    9.50
   9  -9   1  137.59   12.10
   9  -9  -2  241.48   18.40
   9  -9  -2  242.88   17.80
   9  -9  -2  214.08   21.70
  -9   9  -2  238.78   19.00
   9   9   2  258.57   18.60
   9  -9  -2  242.28   18.30
  -9  -9   2  251.37   18.90
   9  -9   2  239.88   23.50
   9   9  -2  240.58   18.70
   9  -9   2  207.58   22.10
   9  -9   2  265.27   18.80
  -9   9   2  273.57   17.00
  -9  -9  -2  254.77   18.60
   9   9  -2  244.48   18.30
   9  -9   2  253.27   18.80
  -9  -9  -2  234.08   21.50
   9  -9  -3   -1.90    6.60
   9  -9  -3    0.10    3.50
   9  -9  -3    2.10    5.20
  -9   9  -3    2.30    5.30
  -9  -9   3    3.80    3.80
   9  -9  -3    5.70    4.90
   9   9   3   -4.00    5.00
   9  -9   3   -0.20    6.20
   9   9  -3    0.00    4.70
  -9   9   3   -0.40    4.90
   9  -9   3    9.60    5.70
  -9  -9  -3    6.60    5.70
   9  -9   3   11.10    5.20
   9   9  -3    2.90    4.00
   9  -9   3   11.60    8.30
  -9  -9  -3   -2.80    6.50
   9  -9  -4  729.03   44.40
   9  -9  -4  723.93   45.00
   9   9   4  724.43   44.90
   9  -9  -4  632.34   47.20
   9  -9   4  615.54   49.80
   9  -9   4  758.22   45.30
   9   9  -4  646.24   44.80
   9   9  -4  678.83   44.50
  -9  -9  -4  741.23   45.60
  -9   9   4  684.03   45.70
   9  -9   4  759.92   53.89
   9  -9  -5  315.47   23.10
  -9   9  -5  341.47   23.50
  -9   9  -5  343.87   24.20
   9   9   5  303.07   22.40
  -9  -9  -5  336.67   24.20
   9  -9   5  351.26   23.70
  -9   9   5  342.17   21.60
   9  -9   5  329.87   23.50
  -9   9  -6   42.60    6.60
   9  -9  -6   39.20    6.10
  -9   9  -6   51.59    7.80
  -9  -9  -6   40.90    7.60
  -9   9  -7  355.06   25.80
   9  -9  -7  421.96   27.60
   9  -9   7  420.16   28.90
   9  -9   7  381.26   26.80
   9  -9  -8  119.99    9.30
  -9   9  -8  100.99    9.00
   9  -9   8  120.29    9.50
   9  -9   8  120.59   10.00
  -9 -10   0    3.30    6.60
   9 -10   0    6.40    4.70
   9  10   0    2.50    5.70
   9 -10   0   -1.10    8.10
   9 -10   0    6.90    6.10
  -9  10  -1   90.19   10.40
   9 -10  -1   80.79   10.20
   9 -10  -1   73.79   12.30
   9 -10  -1   90.99   10.90
   9  10   1   84.69   10.40
  -9 -10  -1   89.29    9.90
   9  10  -1   96.39   10.40
   9 -10   1  106.49   11.50
   9 -10   1   60.79   11.70
   9  10  -1   77.49   11.10
   9 -10   1   84.49   10.80
   9 -10  -2   32.90    6.60
   9 -10  -2   28.80    9.30
   9  10   2   29.90    6.50
   9 -10  -2   21.80    5.00
  -9 -10   2   25.90    6.00
  -9  10  -2   29.20    6.50
   9 -10  -2   20.20    5.40
   9  10  -2   28.00    6.70
   9 -10   2   31.30    6.00
  -9 -10  -2   16.40    7.90
   9 -10   2   32.20    9.70
   9 -10   2   39.30   14.10
  -9 -10  -2   26.70    6.00
   9 -10   2   26.60    6.30
   9  10  -2   20.50    5.10
   9 -10  -3   72.69    9.50
   9  10   3   64.69    9.10
   9 -10  -3   54.79    7.20
  -9  10  -3   65.89   10.30
   9 -10  -3   74.29    9.60
   9 -10   3   84.39   10.00
   9  10  -3   63.29    7.90
  -9 -10  -3   64.99   10.30
   9  10   4   33.00    5.60
   9 -10  -4   43.90    6.00
  -9  10  -4   55.99    7.60
   9 -10  -4   50.39    6.90
  -9  10   4   35.70    5.30
  -9 -10  -4   58.39    8.00
   9  10  -4   50.59    6.70
  -9  10  -5  235.48   18.40
  -9  10  -5  256.87   17.30
   9  10   5  231.28   17.00
   9 -10  -5  256.17   18.10
   9 -10   5  281.07   18.40
  -9 -10  -5  233.48   18.50
   9  10  -5  234.38   17.30
  -9  10   5  238.48   16.40
  -9  10  -6  224.28   14.60
  -9  10  -6  214.88   16.50
   9 -10  -6  225.48   16.60
   9 -10   6  244.88   16.90
  -9 -10  -6  244.28   18.00
   9 -10  -7   61.89    6.90
  -9  10  -7   52.99    5.80
   9 -10   7   74.19    7.00
  -9 -10  -7   53.19    7.10
  -9 -10  -7   56.19    7.40
   9 -10   7   65.49    7.20
   9 -11   0   22.90    5.10
  -9  11   0   20.30    5.20
   9  11   0   22.70    6.10
   9 -11   0   24.60    6.10
  -9 -11  -1 1043.70   65.59
   9  11   2   10.50    5.40
  -9  11  -2   15.90    5.50
   9 -11  -2   22.20    5.90
   9 -11  -2   10.10    4.10
   9  11  -2   12.40    5.10
   9 -11   2   18.70    5.10
  -9 -11  -2   16.00    5.10
   9 -11   2   25.10    6.20
   9 -11  -3  634.94   41.00
   9 -11  -3  660.73   41.70
   9  11   3  629.34   41.20
  -9  11  -3  639.94   41.90
   9  11  -3  621.74   41.40
   9 -11   3  656.03   41.70
   9 -11   3  644.54   41.50
  -9 -11  -3  679.93   41.70
   9  11   4  638.24   40.70
  -9  11  -4  720.43   44.10
  -9  11  -4  624.44   40.40
   9 -11  -4  663.73   41.20
   9 -11  -4  603.74   40.10
   9  11  -4  623.04   40.90
  -9  11  -5  152.88   13.00
   9 -11  -5  163.98   13.00
  -9 -11  -5  163.88   13.70
   9  11  -5  179.08   12.40
   9 -11   5  191.98   13.40
   9 -11   5  180.78   13.30
  -9  11  -6  107.99    8.70
   9 -11  -6  113.79    9.20
  -9 -11  -6  114.89    9.80
   9 -11   6  126.89    9.40
  -9 -11  -6  108.99    8.90
   9 -11   6  124.99    9.50
  -9  12   0    3.00    4.00
   9  12   0   -0.90    4.80
   9 -12   0    3.90    3.90
  -9 -12   0   10.20    3.90
   9 -12   0    3.50    4.80
   9  12   1   34.40    6.10
   9 -12  -1   28.40    5.40
   9 -12  -1   33.70    5.80
  -9  12  -1   23.80    5.10
   9 -12   1   31.30    5.00
   9 -12   1   34.70    6.10
  -9 -12  -1   32.30    5.40
   9  12  -1   34.30    6.10
  -9  12   1   35.80    5.60
   9  12   2    1.30    4.70
  -9  12  -2    0.40    4.40
   9 -12  -2    5.10    5.80
   9  12  -2    4.80    3.80
  -9 -12  -2    3.20    4.10
   9 -12   2    5.50    3.90
   9 -12   2   10.70    4.60
  -9  12  -3  114.49    8.80
   9 -12  -3  100.49    9.60
  -9  12  -3  105.29    9.90
   9  12   3   99.09    9.50
   9 -12  -3  104.39    9.10
   9 -12   3  109.69    9.80
   9 -12   3  119.19   10.10
   9  12  -3  119.99    9.60
  -9 -12  -3  115.19   10.00
   9 -12  -4   19.70    4.10
   9  12   4   17.00    3.10
  -9  12  -4   15.80    3.60
  -9 -12  -4   21.80    4.30
   9  12  -4   18.30    3.50
   9 -12   4   21.10    3.80
  -9  12  -5   16.40    2.80
   9 -12  -5   20.30    3.20
   9 -12   5   23.10    3.50
  -9 -12  -5   23.00    3.80
  -9 -12  -5   18.10    3.20
  -9 -13   0  838.22   51.09
   9 -13   0  804.42   50.69
   9 -13  -1  185.38   13.10
  -9  13  -1  180.28   13.40
  -9 -13   1  192.58   12.80
   9  13   1  197.38   13.40
  -9 -13  -1  182.28   13.10
   9  13  -1  194.18   13.30
  -9  13   1  181.58   13.40
   9 -13   1  179.78   12.80
   9 -13   1  179.48   13.40
  -9  13  -2  412.86   27.00
   9 -13  -2  412.16   26.40
  -9  13   2  419.16   27.00
   9 -13   2  448.86   27.00
   9  13  -2  456.45   27.00
  -9 -13  -2  395.16   26.70
   9 -13   2  423.06   26.70
  -9 -13  -2  389.66   26.80
   9 -13   3  354.16   21.40
  -9 -13  -3  321.67   21.50
   9 -13   3  336.67   21.50
  -9 -13  -3  315.07   21.30
 -10   0   1    5.60    3.00
  10   0   1    1.70    3.10
 -10   0   1    8.00    3.00
  10   0   1   -0.10    3.80
  10   0  -1    7.30    3.00
 -10   0  -1    1.00    4.60
  10   0   2 9542.15  581.24
  10   0   3   -3.70    4.30
  10   0   3    0.00    4.70
  10   0   3    5.60    4.20
 -10   0  -3   -3.30    6.50
  10   0  -3    3.80    2.50
 -10   0   3    3.00    2.60
 -10   0   3    3.10    3.10
  10   0  -4 3043.30  200.38
  10   0   4 3272.47  203.88
  10   0   4 3388.26  203.18
 -10   0  -4 3448.85  207.28
  10   0  -5    1.30    3.00
 -10   0   5    5.90    5.50
 -10   0  -5    7.30    4.80
  10   0  -5    4.30    2.10
  10   0   5    6.60    4.90
 -10   0  -5   -1.50    6.50
 -10   0  -5   19.10    9.00
  10   0   5   21.50    8.30
  10   0   5    6.50    5.70
  10   0   5    5.60    3.60
  10   0   5    4.60    7.70
  10   0   5   12.60    4.60
  10   0   6 1704.83  127.39
  10   0  -6 2080.39  121.79
  10   0   6 1978.00  128.19
 -10   0  -6 2015.80  124.79
  10   0  -6 2164.88  121.69
  10   0   7    4.20    9.10
 -10   0  -7   -3.70    6.10
  10   0   7   -4.00    6.80
  10   0  -7    3.20    4.10
  10   0   7    1.60    4.70
 -10   0  -7   -1.40    5.30
 -10   0   8  119.79    8.80
  10   0   8   78.99   11.30
  10   0   8   83.69   17.60
  10   0   8   95.49   11.20
 -10   0   8  125.79   13.10
 -10   0  -8  111.79   13.60
  10   0  -8   98.79    9.10
 -10   0  -9   -4.60    7.20
 -10   0   9    2.80    2.80
  10   0   9    2.50    4.30
 -10   0  11    1.90    1.60
 -10   0 -11   -4.50    3.40
  10  -1   0    3.00    3.00
 -10   1   0   -3.00    3.60
  10  -1   0    3.70    3.20
  10   1   0    0.30    3.00
 -10   1   0    3.80    3.50
 -10  -1   0    6.20    3.70
  10  -1  -1   10.50    2.50
  10  -1  -1    6.60    2.90
  10   1   1    9.00    2.90
 -10   1  -1    5.40    4.80
 -10  -1   1    6.00    3.00
  10   1   1    8.60    3.60
 -10  -1   1    4.40    2.80
  10  -1  -1   11.20    2.70
 -10  -1  -1    9.80    5.00
 -10   1   1   11.20    3.60
  10  -1   1   15.60    4.30
  10  -1   1   10.50    3.50
 -10   1   1   20.20    3.90
  10  -1   1    9.50    4.00
  10   1  -1   14.40    3.20
  10   1   2 2417.66  154.68
  10  -1  -2 2697.13  153.68
  10  -1   2 2611.94  155.28
  10  -1   2 2259.77  155.68
  10   1  -2 2566.34  153.48
  10   1   3 1720.93  111.99
  10  -1  -3 1878.71  110.39
 -10  -1   3 1594.84  110.69
  10  -1   3 1699.23  113.29
  10  -1   3 1932.21  113.19
 -10  -1  -3 1836.62  115.49
  10   1  -3 1935.51  109.99
  10   1   4    2.90    5.70
  10  -1  -4    7.00    2.40
 -10   1  -4   -4.30    6.10
  10   1   4    5.00    3.60
  10  -1  -4    8.30    3.10
  10   1   4   -1.90    5.10
 -10  -1  -4    3.90    6.00
  10  -1   4    3.80    3.30
  10  -1   4    5.10    5.30
  10  -1   4    8.20    7.70
  10   1  -4    5.80    1.90
 -10  -1  -4    4.80    8.20
  10   1  -4    3.50    1.70
  10  -1   4    5.90    6.10
  10  -1   4    3.30    4.00
 -10   1   4    7.30    3.80
 -10   1   4   -1.50    3.70
  10   1  -4    0.00    2.90
 -10   1  -5  322.37   24.50
  10   1   5  374.46   23.30
 -10  -1   5  336.37   22.70
  10   1   5  340.17   22.10
  10   1   5  284.77   26.00
  10  -1  -5  322.07   21.20
 -10   1  -5  374.06   30.30
  10   1   5  334.67   26.90
 -10   1   5  356.76   23.40
 -10  -1  -5  369.16   23.50
  10   1  -5  304.07   20.40
  10  -1   5  335.07   23.60
  10  -1   5  336.27   27.50
  10   1  -5  342.57   22.50
  10  -1   5  321.47   22.70
 -10  -1  -5  288.67   25.10
 -10   1   5  322.77   23.50
  10  -1   5  295.97   26.30
  10  -1  -6  100.19    7.70
 -10   1  -6  109.89   13.50
  10   1   6  100.09    9.60
  10   1   6   92.99   11.60
  10   1   6   71.39   12.80
  10  -1  -6  103.89    8.20
 -10   1  -6   83.19   11.40
  10   1   6   73.39   15.00
 -10   1   6  106.59   10.60
  10   1  -6   88.69    9.30
  10  -1   6   85.09   10.20
 -10  -1  -6   72.69   11.40
  10  -1   6   90.49   14.40
 -10  -1  -6  106.69   11.50
  10  -1   6  100.19   12.40
 -10   1   6  102.19   10.70
  10  -1   6   93.69   14.60
  10  -1  -7   24.70    4.70
 -10   1  -7   34.20    5.30
  10  -1  -7   32.90    4.60
  10   1   7   23.40   10.40
  10   1   7   23.10    7.50
  10  -1  -7   27.80    5.70
  10   1   7   32.50    5.60
 -10   1  -7   21.30    8.80
  10  -1  -7   36.20    4.80
 -10  -1  -7   24.40    7.90
  10  -1   7   19.60   10.90
  10  -1   7   28.80    6.20
  10  -1   7   22.70    7.90
  10   1  -7   27.30    4.80
 -10  -1  -7   27.50    7.30
 -10   1   7   32.10    6.80
  10   1   8   39.50    5.80
  10   1   8   18.20   10.20
  10  -1  -8   36.40    5.40
 -10   1  -8   35.40   10.10
  10  -1   8   21.60   11.80
 -10   1   8   45.40    6.00
  10  -1   8   26.70    8.70
  10  -1   8   37.80    6.70
 -10   1   8   44.70    9.80
 -10  -1  -8   33.80    8.80
 -10   1  -9   -8.40    7.80
 -10  -1  -9   -7.20    6.90
  10  -1   9  -14.00    7.00
  10  -1   9   -1.40    4.70
 -10   1 -10    1.30   10.00
 -10  -1 -10   -3.60    9.70
  10  -1  10   17.10    3.80
 -10   1  10   18.50    2.90
 -10   2   0  429.16   27.70
 -10   2   0  433.86   27.90
  10  -2   0  399.56   26.80
  10   2   0  380.16   26.40
  10  -2   0  412.76   27.60
 -10  -2   0  413.26   27.60
  10   2   1 2180.98  134.09
  10  -2  -1 2335.77  133.79
  10  -2   1 2050.09  135.59
  10   2  -1 2278.77  133.39
  10  -2   1 2047.30  134.39
  10   2   2 2569.74  164.08
  10  -2  -2 2834.02  163.38
  10   2  -2 2746.53  162.68
  10  -2   2 2517.75  165.78
  10  -2  -3  300.17   19.60
  10   2   3  290.87   21.50
 -10  -2   3  284.87   19.60
  10   2   3  270.77   21.00
  10  -2   3  270.07   22.90
  10  -2   3  325.47   23.90
  10  -2   3  303.07   22.90
 -10   2   3  320.27   20.80
 -10  -2  -3  319.47   24.80
 -10   2   3  297.37   20.60
  10   2   4  257.47   20.20
 -10  -2   4  257.97   18.60
  10  -2  -4  277.47   17.00
  10   2   4  252.87   17.40
  10   2   4  225.08   19.10
  10  -2   4  226.68   21.00
  10   2  -4  260.37   17.50
  10  -2   4  223.58   22.10
 -10  -2  -4  233.68   19.40
  10  -2   4  212.88   20.10
 -10  -2  -4  248.38   23.40
 -10   2   4  267.17   18.50
 -10   2   4  257.17   18.40
  10  -2   4  267.67   21.70
  10   2   5  685.63   47.60
 -10  -2   5  732.93   44.30
  10   2   5  701.63   44.50
  10  -2  -5  685.43   43.40
 -10   2  -5  670.03   45.20
  10  -2  -5  727.23   43.70
  10   2   5  688.03   43.40
 -10  -2  -5  714.03   45.10
 -10   2   5  735.53   44.40
 -10   2   5  711.43   45.60
  10  -2   5  695.23   49.10
 -10  -2  -5  615.24   51.99
 -10   2   5  745.53   45.40
  10   2  -5  645.94   44.00
 -10  -2  -5  643.94   46.30
  10  -2   5  712.63   45.30
  10  -2   5  659.23   44.50
  10  -2  -6  199.08   13.80
 -10   2  -6  207.38   19.10
  10   2   6  187.88   20.20
  10   2   6  166.08   19.60
  10   2   6  215.88   14.10
  10   2   6  193.98   16.70
 -10  -2  -6  182.98   15.20
 -10   2   6  179.98   15.70
 -10   2   6  174.88   13.20
  10  -2   6  167.98   19.50
  10   2  -6  176.88   14.00
  10  -2   6  177.38   21.10
 -10   2  -7   21.90    9.10
  10  -2  -7   26.90    5.10
  10   2   7   17.10    9.30
  10  -2  -7   30.30    4.20
  10  -2   7   20.90    5.90
  10  -2   7   19.00    8.80
  10  -2   7   26.40    8.10
  10   2  -7   25.30    4.40
 -10   2   7   36.80    6.90
 -10   2   7   38.00    5.80
 -10  -2  -7   19.40    8.80
 -10  -2  -7   24.60    6.60
 -10   2   7   37.90    7.20
  10  -2   7   38.20   11.90
 -10  -2   8  286.57   19.40
  10  -2  -8  286.37   17.40
  10  -2  -8  279.57   17.50
  10  -2  -8  267.07   19.20
 -10   2  -8  210.68   23.00
  10   2   8  253.57   17.90
  10  -2  -8  235.38   18.00
  10   2   8  254.47   24.50
  10  -2   8  284.87   22.50
  10  -2   8  249.97   27.80
  10  -2   8  239.78   30.70
 -10   2   8  278.67   20.60
  10  -2   8  256.07   20.20
 -10  -2  -8  289.37   21.70
 -10   2   8  266.27   18.00
  10   2   9  295.57   21.60
 -10   2  -9  294.87   26.00
 -10  -2  -9  376.36   25.50
  10  -2   9  342.97   26.10
 -10   2   9  350.46   22.00
  10  -2   9  363.26   23.90
 -10  -2  10  276.47   18.00
 -10   2  10  270.87   18.20
  10  -2  10  280.57   19.10
 -10  -2 -10  302.87   21.60
  10  -3   0    3.70    3.60
 -10   3   0   -2.40    3.90
 -10   3   0    3.00    3.80
  10  -3   0    6.60    3.50
  10  -3   0    3.30    4.10
  10   3   0    1.90    2.80
 -10  -3   0    0.30    3.30
  10  -3  -1  262.47   18.80
  10  -3  -1  272.97   19.90
 -10   3  -1  305.27   21.10
  10   3   1  264.67   19.00
 -10  -3   1  307.07   19.20
  10   3  -1  245.38   17.90
 -10   3   1  293.47   19.60
 -10  -3  -1  293.67   20.80
  10  -3   1  301.47   21.00
  10  -3   1  270.57   19.70
 -10   3   1  322.27   19.80
  10  -3   1  240.08   20.80
 -10   3  -2 1473.85   91.99
  10  -3  -2 1347.27   88.59
  10   3   2 1413.76   89.39
  10  -3   2 1511.05   90.69
  10  -3   2 1348.86   91.49
 -10  -3  -2 1544.35   91.69
 -10   3  -3 1022.00   60.59
  10   3   3  840.82   60.39
 -10   3  -3  945.21   63.79
  10  -3  -3  970.40   59.49
  10  -3  -3  871.31   59.09
  10   3   3 1049.00   60.29
  10  -3  -3 1044.10   59.39
  10  -3   3  995.80   62.59
 -10   3   3  979.00   60.39
 -10  -3  -3  956.40   63.39
  10  -3   3  873.81   62.79
  10  -3   3  895.61   59.59
  10   3  -3  976.70   62.39
  10  -3   3 1087.29   63.59
  10  -3   3  842.62   59.59
  10   3   4  272.67   22.60
  10  -3  -4  336.87   20.80
 -10  -3   4  322.47   20.30
  10   3   4  311.87   22.70
  10  -3  -4  291.77   20.30
  10  -3   4  281.67   21.20
 -10   3   4  338.97   22.30
  10  -3   4  291.47   21.40
 -10  -3  -4  322.87   27.40
 -10   3   4  311.07   22.40
 -10  -3  -4  320.27   22.90
  10  -3   4  283.77   24.90
 -10   3   4  302.47   20.00
  10  -3   4  335.87   27.80
  10  -3   4  320.27   25.20
  10   3   5  631.84   42.00
 -10  -3   5  664.73   39.00
  10  -3  -5  638.94   39.00
 -10   3  -5  622.94   41.70
  10  -3  -5  606.24   38.60
 -10   3  -5  658.23   39.70
 -10   3   5  602.14   40.50
  10   3  -5  554.44   39.00
 -10   3   5  651.73   40.70
  10  -3   5  596.44   44.10
  10  -3   5  559.94   39.60
 -10  -3  -5  647.64   41.80
  10  -3   5  604.94   40.20
 -10   3   5  555.34   38.40
 -10  -3  -5  673.33   47.00
  10  -3   5  538.35   43.80
  10  -3  -6  170.98   12.30
  10  -3  -6  171.18   13.00
 -10   3  -6  148.99   17.80
  10   3   6  141.59   16.40
 -10   3   6  181.98   15.30
 -10   3   6  166.88   14.80
  10   3  -6  161.78   12.70
 -10  -3  -6  116.79   20.90
  10  -3   6  192.98   16.10
  10   3  -6  150.98   13.20
  10  -3   6  177.68   14.50
  10  -3   6  147.99   18.70
 -10  -3  -6  153.88   13.50
 -10  -3  -6  137.89   17.40
 -10   3  -7  135.89   19.50
 -10  -3   7  209.68   14.10
  10   3   7  170.58   12.60
  10   3   7  193.68   19.70
  10  -3  -7  195.48   13.50
  10  -3  -7  204.48   14.40
 -10  -3  -7  173.78   16.00
  10  -3   7  202.28   16.20
 -10   3   7  177.08   16.00
  10   3  -7  173.58   13.30
 -10   3   7  182.38   13.30
  10  -3   7  189.98   17.90
  10  -3   7  160.08   20.20
  10  -3   7  157.38   22.60
 -10   3   7  197.78   16.50
 -10  -3  -7  160.18   18.90
  10  -3  -8  146.89   11.10
  10  -3  -8  133.59   12.80
  10  -3  -8  153.58   11.70
 -10  -3  -8  141.09   14.60
  10  -3   8  155.68   14.30
 -10   3   8  133.49   13.80
 -10   3   8  147.89   11.40
  10  -3   8  164.08   16.70
  10  -3  -9   11.00    2.60
 -10   3  -9    1.70    6.90
  10  -3   9   12.20    5.30
 -10  -3  -9   10.00    6.60
  10  -3   9    5.90    7.50
 -10   3   9   11.60    3.30
 -10   3 -10   79.49    8.60
  10  -3  10   84.09   10.10
 -10   3  10   84.69    6.90
  10  -3  10   88.79    8.40
 -10  -3 -10   71.09   10.90
  10  -4   0   48.70    7.70
  10  -4   0   63.69    7.00
  10  -4   0   43.30    7.70
 -10   4   0   57.09    7.80
 -10  -4   0   60.99    7.30
 -10   4   0   65.89    8.00
  10   4   0   67.49    5.80
 -10   4  -1  554.64   35.50
  10  -4  -1  545.35   33.70
 -10  -4   1  522.35   33.60
  10  -4  -1  528.25   34.80
 -10   4   1  523.55   34.20
  10  -4   1  542.75   34.40
  10  -4   1  507.15   35.60
 -10   4   1  509.75   34.00
  10  -4   1  449.56   35.70
 -10  -4  -1  506.35   34.90
  10   4   2   22.60    5.30
 -10   4  -2   28.60    5.10
 -10   4  -2   33.20    7.20
 -10  -4   2   32.40    4.50
  10  -4  -2   29.50    4.80
  10  -4  -2   23.10    5.60
  10  -4   2   20.10    4.20
 -10  -4  -2   27.70    7.70
 -10   4   2   28.30    5.20
  10  -4   2   25.60    6.50
 -10   4   2   34.20    4.80
  10  -4   2   26.50    4.70
  10   4  -2   23.80    4.50
  10  -4   2   30.70    7.20
  10  -4   2   16.70    6.70
  10   4   3  483.25   35.50
 -10  -4   3  543.85   34.00
  10  -4  -3  551.74   34.80
 -10   4   3  603.44   35.90
  10   4  -3  494.15   35.10
 -10  -4  -3  552.74   38.60
 -10  -4  -3  517.15   35.50
  10  -4   3  538.05   38.70
 -10   4   3  603.64   36.40
  10  -4   3  581.84   38.30
  10  -4   3  490.55   35.00
  10  -4   3  525.15   37.50
  10  -4   3  607.84   39.80
  10  -4  -4  168.98   13.70
  10  -4  -4  177.88   12.90
  10   4   4  157.58   14.20
 -10  -4   4  171.38   11.70
 -10   4  -4  197.18   13.90
 -10  -4  -4  159.78   18.20
  10   4  -4  159.88   12.50
 -10   4   4  186.18   14.60
 -10  -4  -4  166.08   15.30
  10  -4   4  158.28   17.70
 -10   4   4  173.88   14.40
  10  -4   4  180.98   14.10
  10  -4   4  199.78   18.20
  10  -4   4  166.68   14.00
  10   4  -4  168.98   13.30
 -10   4   4  170.88   12.30
 -10   4  -5   28.30    9.10
 -10  -4   5   38.70    4.70
  10  -4  -5   35.50    6.00
  10   4   5   39.50    8.30
  10   4   5   48.00    8.00
  10  -4  -5   34.60    5.10
 -10  -4  -5   30.60    8.40
  10  -4   5   58.29   11.20
  10  -4   5   49.99    7.40
 -10   4   5   32.30    6.60
  10   4  -5   30.90    5.10
  10   4  -5   41.40    5.30
 -10   4   5   37.40    5.80
 -10  -4  -5   39.80   11.50
  10  -4   5   39.10   10.10
 -10   4   5   35.20    7.30
  10  -4   5   33.90    6.00
  10  -4  -6   61.99    7.80
  10   4   6   66.39   10.20
 -10   4  -6   42.60   10.70
  10  -4  -6   54.69    8.20
 -10  -4  -6   45.30   13.90
  10   4  -6   64.99    7.30
  10   4  -6   56.19    8.10
 -10   4   6   57.19    7.10
 -10  -4  -6   60.09   11.30
 -10   4   6   55.29    8.20
  10  -4   6   84.49   11.90
  10  -4   6   67.99   13.10
 -10   4   6   51.19    8.20
  10  -4  -7  496.15   32.00
  10   4   7  542.35   36.10
 -10   4  -7  423.86   36.10
  10  -4  -7  513.55   32.70
  10  -4   7  564.64   35.40
 -10   4   7  485.15   31.80
  10  -4   7  567.14   42.10
 -10  -4  -7  460.55   33.40
 -10  -4  -7  471.95   35.90
 -10   4   7  506.65   34.40
  10  -4   7  507.35   33.80
  10   4  -7  475.45   33.10
  10  -4   7  486.35   39.80
  10  -4  -8   34.30    5.10
 -10   4  -8   21.50    8.50
 -10  -4  -8   45.70    8.90
 -10   4   8   46.50    6.50
  10  -4   8   47.00    7.30
  10  -4   8   64.69   10.40
 -10  -4  -8   42.20    7.60
 -10   4  -9  279.07   21.00
  10  -4  -9  313.47   18.70
  10  -4  -9  258.17   19.10
 -10   4   9  269.57   18.70
  10  -4   9  285.27   22.90
 -10  -4  -9  292.07   22.10
  10  -4   9  298.27   20.60
 -10   4 -10   11.40    2.90
 -10  -4 -10    6.20    5.10
 -10   4  10    9.30    2.50
  10  -4  10    1.40    5.60
  10  -4  10    7.80    3.60
 -10  -5   0    0.50    3.60
  10   5   0    0.50    3.40
 -10   5   0    0.40    2.70
  10  -5   0    6.40    5.20
  10  -5   0   -4.30    2.80
  10  -5   0    6.60    5.20
  10   5   0   -0.40    3.10
  10  -5   0   -0.50    3.10
 -10   5   0    4.50    4.10
  10  -5   0    8.50    4.40
  10  -5  -1  124.99   12.90
  10  -5  -1  118.19    9.80
  10  -5  -1  134.39   11.00
 -10   5  -1  132.69   10.20
  10   5   1  118.49   10.70
  10   5   1  102.69   10.60
 -10   5  -1  128.19   12.20
 -10  -5   1  133.09   11.70
 -10   5   1  131.89    9.80
 -10  -5  -1  133.69   12.10
  10  -5   1  120.39   11.70
 -10   5   1  131.69   11.80
  10  -5   1  124.19   13.70
 -10   5   1  139.49   11.40
  10  -5   1  110.89   10.20
  10   5  -1  101.69   10.00
  10   5  -1  115.49   10.70
  10  -5   1  142.19   11.90
  10  -5   1  116.89   12.80
 -10  -5   2  115.99    8.90
  10  -5  -2   95.59    8.80
  10  -5  -2  106.19    9.40
  10  -5  -2  111.79   11.80
  10  -5  -2  118.89   10.30
  10   5   2   86.49    9.60
 -10   5   2  119.49   10.50
  10  -5   2  100.39    9.70
  10  -5   2   95.79   12.80
 -10  -5  -2  100.99   12.10
 -10   5   2  130.89   10.80
 -10   5   2  118.09    8.60
  10   5  -2   98.89    9.80
  10  -5   2   98.79    9.70
  10  -5   2  107.19   12.80
  10  -5   2  129.69   12.90
  10  -5  -3    4.70    3.50
  10  -5  -3    4.60    5.20
 -10  -5   3   12.60    2.80
  10   5   3    3.30    4.10
  10  -5  -3   10.30    3.30
  10   5   3    4.90    5.20
  10  -5  -3    8.70    4.90
 -10   5  -3    7.30    4.20
 -10   5   3    8.70    4.90
 -10  -5  -3    1.20    4.30
 -10  -5  -3    6.90    6.80
  10  -5   3    9.90    4.30
  10   5  -3    4.00    3.30
  10  -5   3   10.30    4.80
  10  -5   3    7.70    6.30
  10   5  -3    7.30    3.90
  10  -5   3    6.50    6.50
 -10   5   3    6.80    3.10
  10  -5  -4   14.10    4.50
  10   5   4   15.40    5.60
  10   5   4    3.40    4.10
 -10   5  -4   14.80    4.10
 -10  -5   4   13.10    2.30
  10  -5  -4   12.10    5.00
  10  -5   4   23.10    5.20
  10   5  -4   14.80    4.40
  10  -5   4   16.60    7.80
 -10  -5  -4    7.50    5.80
  10  -5   4   27.10    8.60
 -10   5   4   19.30    5.90
 -10  -5  -4    3.90    7.60
  10   5  -4   13.70    3.90
  10  -5   4   14.30    5.20
 -10   5   4   15.60    5.50
 -10   5   4   10.30    3.40
  10  -5  -5  104.59    9.90
 -10  -5   5   98.59    7.40
 -10   5  -5   92.69   14.00
  10  -5  -5  112.29   10.90
 -10   5   5  104.09   11.80
 -10   5   5  111.79    9.40
 -10  -5  -5  111.09   13.40
  10   5  -5  102.79   10.00
 -10  -5  -5   93.69   15.20
  10  -5   5  126.79   12.30
  10  -5   5  121.69   11.80
  10  -5   5  117.99   16.20
  10   5   6  213.88   17.20
  10  -5  -6  258.17   17.40
 -10  -5   6  210.58   15.10
 -10   5  -6  196.58   21.20
  10   5   6  282.27   18.40
 -10   5  -6  270.87   18.20
  10  -5   6  241.18   24.10
  10  -5   6  296.47   25.70
 -10  -5  -6  250.07   21.60
  10  -5   6  276.77   20.10
  10   5  -6  231.48   16.90
 -10   5   6  228.08   16.50
 -10  -5  -6  223.88   25.30
 -10   5   6  241.58   19.30
 -10   5   6  234.88   19.10
  10   5  -6  223.48   17.70
 -10   5  -7   54.39   10.50
 -10   5  -7   57.69    9.20
  10  -5  -7   36.80    5.90
  10  -5  -7   57.39    8.50
  10  -5   7   48.80   11.50
 -10   5   7   50.89    6.90
 -10   5   7   41.70    7.80
 -10   5   7   68.09    8.90
 -10  -5  -7   58.09    7.70
  10   5  -7   42.80    6.50
  10  -5   7   47.10   12.50
 -10   5  -8   -0.40    6.20
  10  -5  -8    4.00    3.90
  10  -5   8    7.20    5.40
 -10  -5  -8   -1.20    5.60
  10  -5   8   11.60    7.30
 -10   5   8    2.40    3.30
 -10  -5  -8  -10.90    7.30
  10  -5  -9    3.50    5.20
  10  -5  -9   -1.20    3.30
 -10   5  -9    0.90    4.00
  10  -5   9    3.00    6.20
 -10   5   9    3.00    2.70
 -10  -5  -9   -3.60    4.90
  10  -5   9    2.40    4.30
  10  -5  10   43.30    5.50
  10  -5  10   30.80    5.80
 -10   5  10   43.10    4.20
  10  -6   0 3157.28  196.68
  10  -6  -1   21.70    4.10
 -10   6  -1   27.00    4.80
 -10  -6   1   30.00    5.10
  10  -6  -1   22.30    5.70
  10  -6  -1   31.00    5.20
  10   6   1   24.60    5.10
  10  -6  -1   18.70    6.70
  10   6   1   17.40    4.90
 -10   6   1   20.90    5.80
 -10  -6  -1   18.20    5.90
 -10   6   1   33.00    5.10
  10   6  -1   25.90    5.30
  10  -6   1   15.40    6.40
  10   6  -1   19.50    4.80
 -10   6   1   25.70    5.90
  10  -6   1   25.10    4.60
  10  -6   1   26.20    7.20
  10  -6   1   30.00    5.50
  10  -6   1   36.00    8.80
  10  -6  -2  909.01   56.79
  10   6   2  830.12   54.89
  10  -6  -2  909.21   55.19
  10  -6  -2  836.72   53.79
 -10  -6   2  977.50   54.99
  10  -6  -2  801.52   54.39
 -10   6  -2  956.40   57.19
  10   6   2  822.62   55.29
  10  -6  -2  867.31   54.29
  10   6  -2  893.61   55.09
 -10  -6  -2  852.81   57.29
 -10   6   2  940.31   55.79
  10  -6   2  903.71   57.89
  10  -6   2  797.02   58.29
  10  -6   2  805.02   54.69
  10   6  -2  794.92   54.59
 -10  -6   3  398.86   25.00
 -10   6  -3  430.86   25.20
  10  -6  -3  357.86   25.00
  10   6   3  417.16   27.10
 -10   6  -3  438.16   26.80
  10   6   3  351.36   25.90
  10  -6  -3  359.36   25.50
  10  -6  -3  344.97   25.90
  10  -6  -3  385.06   27.70
 -10  -6  -3  374.76   29.30
  10  -6   3  379.46   26.20
  10  -6   3  406.16   26.00
 -10   6   3  430.66   27.00
 -10   6   3  390.66   24.80
  10  -6   3  392.66   29.70
  10  -6   3  328.67   29.70
 -10   6   3  390.06   26.80
  10   6  -3  357.76   25.60
 -10  -6  -3  360.16   26.30
  10   6  -3  376.06   26.00
  10  -6  -4  454.15   31.20
  10   6   4  421.06   30.70
 -10  -6   4  419.66   26.20
  10  -6  -4  414.86   28.20
  10  -6  -4  399.56   29.00
 -10   6   4  423.16   26.80
 -10   6   4  436.76   29.20
  10   6  -4  375.76   27.60
  10  -6   4  415.86   33.10
  10  -6   4  449.56   33.50
  10  -6   4  426.16   28.30
 -10   6   4  386.86   33.10
 -10  -6  -4  360.76   32.00
  10   6  -4  432.56   30.20
  10  -6   4  440.46   28.50
  10  -6  -5   27.70    6.60
  10  -6  -5   37.50    6.20
 -10   6  -5   43.40    6.70
  10   6   5   28.90    6.00
 -10   6   5   30.50    7.10
  10  -6   5   34.20   10.00
 -10   6   5   33.10    6.80
 -10  -6  -5   14.60    9.30
  10  -6   5   27.60    5.90
 -10   6   5   41.00    6.30
  10  -6   5   60.29   12.20
  10  -6   5   44.30    7.60
  10   6  -5   24.20    5.00
  10   6  -5   34.80    5.30
  10   6  -5   28.80    5.10
 -10  -6  -5   38.10    8.70
  10   6   6  493.45   35.30
  10  -6  -6  546.55   36.10
 -10   6  -6  539.65   37.90
  10  -6  -6  547.45   35.40
  10  -6   6  589.04   44.90
  10  -6   6  573.34   36.50
 -10  -6  -6  583.94   38.00
  10   6  -6  487.25   34.80
 -10   6   6  543.95   37.90
  10  -6   6  615.54   37.20
 -10   6   6  512.35   37.00
  10  -6   6  540.15   42.10
 -10   6  -7   70.29   10.00
 -10   6  -7   87.39    9.30
  10  -6  -7   75.79    9.20
 -10   6   7   79.99    8.00
 -10  -6  -7   86.39   10.20
 -10  -6  -7   71.89   11.20
  10   6  -7   64.59    9.10
 -10  -6  -8  772.62   52.59
  10  -6   8  878.11   53.79
 -10  -6  -8  824.62   53.49
 -10   6  -9   23.60    3.20
  10  -6  -9   19.80    3.60
  10  -6  -9   21.20    4.50
 -10  -6  -9   21.70    4.90
  10  -6   9   23.90    6.10
  10  -6   9   25.50    4.60
 -10   6   9   18.00    2.90
  10   7   0   -4.30    4.30
  10  -7   0    1.50    6.30
  10  -7   0    0.30    6.50
  10  -7   0    3.40    4.70
  10  -7   0   -6.00    7.40
  10   7   0    4.00    4.50
 -10   7   0    5.50    3.80
 -10  -7   0    4.50    4.90
  10  -7   0   -4.00    3.80
  10  -7   0    1.80    3.90
 -10   7  -1   38.30    5.20
  10  -7  -1   33.40    5.60
  10  -7  -1   34.60    7.40
  10   7   1   40.20    6.70
  10  -7  -1   29.00    5.50
  10  -7  -1   38.50    8.50
 -10  -7   1   41.10    6.60
  10   7   1   32.70    6.40
  10   7  -1   31.40    5.90
 -10   7   1   40.10    5.60
  10  -7   1   41.30    5.60
 -10  -7  -1   31.30    7.30
  10   7  -1   33.70    6.00
  10  -7   1   30.90    8.80
  10  -7   1   26.90    8.20
  10  -7   1   36.40    6.10
  10   7   2  200.38   16.40
 -10   7  -2  192.08   15.30
 -10  -7   2  204.18   14.90
  10  -7  -2  188.58   14.90
  10  -7  -2  198.78   16.00
  10  -7  -2  184.08   14.60
 -10   7  -2  188.48   13.70
  10   7   2  174.38   15.20
  10  -7  -2  193.48   18.00
  10  -7  -2  178.88   13.90
 -10  -7  -2  177.08   14.90
 -10  -7  -2  212.88   18.20
  10   7  -2  208.68   15.50
  10   7  -2  187.18   15.20
  10  -7   2  186.08   18.50
 -10   7   2  183.48   16.10
  10  -7   2  226.98   19.90
 -10   7   2  210.88   13.70
  10  -7   2  186.38   19.50
  10  -7   2  205.68   18.90
 -10   7  -3   60.79    9.10
  10  -7  -3   56.69    8.30
  10   7   3   42.90    7.10
  10   7   3   44.40    7.20
  10  -7  -3   46.40    7.40
 -10  -7   3   48.20    6.10
  10  -7  -3   44.40    8.20
 -10   7   3   62.89    6.90
 -10   7   3   38.60    7.30
  10   7  -3   62.89    8.30
  10  -7   3   69.69   12.10
  10   7  -3   65.29    8.50
  10  -7   3   55.79   14.40
  10  -7   3   64.39    8.90
 -10  -7  -3   51.59   10.20
  10  -7  -4   61.89    7.50
  10   7   4   65.09    9.60
  10  -7  -4   61.29    9.50
  10  -7  -4   77.39    9.40
  10  -7  -4   71.69   10.50
 -10  -7  -4   69.49   11.10
 -10  -7  -4   80.89   13.20
  10  -7   4   94.29   10.70
 -10   7   4   87.19    7.80
  10  -7   4   93.89   10.20
  10   7  -4   69.19    9.10
  10   7  -4   60.59    8.80
  10  -7   4   78.39   12.70
 -10   7   4   63.49    8.80
  10  -7   4   94.99   13.30
  10  -7  -5   41.70    6.60
  10  -7  -5   34.60    7.80
 -10   7  -5   48.90    8.50
 -10   7  -5   36.20    6.50
  10   7   5   24.80    5.70
  10   7  -5   25.00    5.00
  10  -7   5   31.60    8.80
  10  -7   5   48.00    6.90
 -10   7   5   29.80    6.90
 -10  -7  -5   45.30   10.90
  10  -7   5   50.39   11.00
 -10   7   5   44.80    6.20
 -10  -7  -5   36.50    8.10
  10   7  -5   38.20    5.40
  10   7  -5   26.50    5.00
  10   7   6  187.68   15.80
 -10   7  -6  242.18   17.20
  10  -7  -6  176.98   17.00
 -10   7  -6  234.58   18.60
  10  -7  -6  212.98   16.50
 -10   7   6  221.28   15.10
  10  -7   6  223.98   17.30
 -10  -7  -6  205.18   18.80
  10  -7   6  250.47   18.30
 -10   7  -7    5.20    5.30
  10  -7  -7    6.50    4.80
 -10   7  -7    5.80    4.40
  10  -7   7   10.90    5.20
 -10   7   7    5.00    3.10
  10  -7   7   17.50    6.40
  10   7  -7    5.00    3.90
 -10  -7  -7   -8.00    7.20
  10  -7  -8   99.69    9.80
 -10   7  -8  102.09   10.10
 -10  -7  -8  128.19   10.90
  10  -7   8  116.89   10.80
 -10   7   8  100.39    8.30
  10  -7   8  113.59   12.00
  10  -7  -9   53.89    5.70
  10  -7  -9   42.00    5.90
 -10   7   9   48.40    4.60
  10  -7   9   64.49    7.90
 -10  -7  -9   68.39    7.00
  10  -7   9   64.89    6.80
 -10   8   0  576.34   34.60
  10   8   0  580.04   36.40
  10  -8   0  539.95   35.30
  10  -8   0  552.84   35.80
  10  -8   0  569.44   39.30
  10   8   0  548.65   36.00
  10  -8   0  498.15   39.70
  10  -8   0  485.45   35.70
  10  -8  -1 2100.89  128.69
  10  -8   1 1901.81  130.09
  10  -8   1 2117.99  129.29
 -10  -8  -1 2029.00  128.39
 -10  -8   2   23.60    5.40
  10  -8  -2   20.20    5.20
  10   8   2   28.10    6.40
  10  -8  -2   17.10    4.30
  10   8   2   14.80    5.80
  10  -8  -2   14.70    8.50
  10  -8  -2   17.60    5.40
 -10   8  -2   35.20    6.20
  10  -8  -2   26.80    8.60
  10  -8   2   21.80    8.60
 -10   8   2   30.60    5.10
  10   8  -2   30.60    6.20
 -10  -8  -2   27.40    8.60
 -10  -8  -2   26.60    5.90
 -10   8   2   13.60    6.10
  10  -8   2   19.20    5.40
  10  -8   2   28.30    6.20
  10   8  -2   24.90    6.10
  10  -8   2   25.90   13.50
 -10  -8   3  792.72   50.79
  10  -8  -3  795.12   50.99
 -10   8  -3  856.61   51.89
  10  -8  -3  764.92   53.29
  10   8   3  804.62   52.09
  10  -8  -3  769.12   50.49
[truncated: 236,470 more chars]
